# Supplementary material
Source: Research Square preprint supplement (doi:10.21203/rs.3.rs-9809611/v1)
Supplement: Supplementary file 1 [file 0944a400744af76764a03023.xlsx]

## Sheet: 华证指数esg 评级评分（年度） 2009-2024
证券代码	时间	证券简称	综合评级	综合复制	综合得分	E评级	E得分	S评级	S得分	G评级	G得分	证监会行业新	同花顺行业新	申万行业
1	2009	平安银行	BBB	6	82.38	CCC	69.87	BB	77.46	AA	91.77	货币金融服务	股份制银行	股份制银行Ⅲ
1	2010	平安银行	BBB	6	81.49	CCC	69.87	BB	75.07	AA	91.51	货币金融服务	股份制银行	股份制银行Ⅲ
1	2011	平安银行	BBB	6	80.71	CC	60.53	BB	77.54	AA	92.55	货币金融服务	股份制银行	股份制银行Ⅲ
1	2012	平安银行	BBB	6	84.76	B	72.98	BBB	82.01	AA	92.29	货币金融服务	股份制银行	股份制银行Ⅲ
1	2013	平安银行	A	7	85.16	BB	76.2	BBB	82.01	AA	91.62	货币金融服务	股份制银行	股份制银行Ⅲ
1	2014	平安银行	BBB	6	84.45	B	72.98	BBB	83.75	AA	90.41	货币金融服务	股份制银行	股份制银行Ⅲ
1	2015	平安银行	BBB	6	83.63	B	72.98	BBB	80.15	AA	91.14	货币金融服务	股份制银行	股份制银行Ⅲ
1	2016	平安银行	BBB	6	84.73	BB	79.41	BB	79.23	AA	91.1	货币金融服务	股份制银行	股份制银行Ⅲ
1	2017	平安银行	BBB	6	81.69	BBB	80.52	B	74.32	A	87.39	货币金融服务	股份制银行	股份制银行Ⅲ
1	2018	平安银行	BB	5	77.59	BB	77.31	CCC	67.27	BBB	84.91	货币金融服务	股份制银行	股份制银行Ⅲ
1	2019	平安银行	BBB	6	82.22	BB	77.31	BB	78.17	A	87.39	货币金融服务	股份制银行	股份制银行Ⅲ
1	2020	平安银行	BBB	6	81.45	BB	77.31	B	71.78	AA	90.18	货币金融服务	股份制银行	股份制银行Ⅲ
1	2021	平安银行	BBB	6	84.84	A	85.58	BBB	83.58	A	85.47	货币金融服务	股份制银行	股份制银行Ⅲ
1	2022	平安银行	BBB	6	84.91	BBB	83.08	BBB	83.29	A	86.77	货币金融服务	股份制银行	股份制银行Ⅲ
1	2023	平安银行	A	7	86.75	BBB	80.81	A	87.69	A	88.3	货币金融服务	股份制银行	股份制银行Ⅲ
1	2024	平安银行	AA	8	91.58	BB	79.42	A	89.39	A	87.36	货币金融服务	股份制银行	股份制银行Ⅲ
2	2009	万科A	BBB	6	80.3	CCC	69.23	BBB	81.92	BBB	82.41	房地产业	住宅开发	住宅开发
2	2010	万科A	BBB	6	83.93	B	70.8	AA	91.05	BBB	81.53	房地产业	住宅开发	住宅开发
2	2011	万科A	BBB	6	81.81	CCC	67.21	AA	92.72	BB	76.29	房地产业	住宅开发	住宅开发
2	2012	万科A	BBB	6	84.27	CCC	65.41	AA	91.88	BBB	83.28	房地产业	住宅开发	住宅开发
2	2013	万科A	BBB	6	83.46	B	70.8	AA	93.64	BB	77.99	房地产业	住宅开发	住宅开发
2	2014	万科A	BBB	6	83.41	CC	63.61	AA	92.3	BBB	81.53	房地产业	住宅开发	住宅开发
2	2015	万科A	BBB	6	84.7	CCC	67.21	AA	92.3	BBB	83.28	房地产业	住宅开发	住宅开发
2	2016	万科A	BBB	6	80.14	CC	62.03	A	87.79	BB	78.88	房地产业	住宅开发	住宅开发
2	2017	万科A	BBB	6	83.49	CC	64.51	AA	93.13	BBB	80.61	房地产业	住宅开发	住宅开发
2	2018	万科A	BBB	6	83.74	CCC	69.91	AA	92.47	BBB	80.02	房地产业	住宅开发	住宅开发
2	2019	万科A	A	7	85.66	CC	64.51	AA	94.06	BBB	84.68	房地产业	住宅开发	住宅开发
2	2020	万科A	A	7	86.21	CC	64.51	AA	94.06	A	85.93	房地产业	住宅开发	住宅开发
2	2021	万科A	BBB	6	83.9	A	88.66	BBB	83.16	BBB	80.73	房地产业	住宅开发	住宅开发
2	2022	万科A	A	7	85.55	A	86.64	A	85.6	BBB	84.65	房地产业	住宅开发	住宅开发
2	2023	万科A	BBB	6	83.78	A	86.37	BB	77.11	A	86.77	房地产业	住宅开发	住宅开发
2	2024	万科A	A	7	87.45	A	86.63	BB	78.11	A	85.59	房地产业	住宅开发	住宅开发
4	2009	国华网安	CCC	3	66.52	C	47.5	CCC	65.26	BB	77.09	软件和信息技术服务业	软件开发	横向通用软件
4	2010	国华网安	CCC	3	65.44	C	51.08	CCC	67.84	B	71.15	软件和信息技术服务业	软件开发	横向通用软件
4	2011	国华网安	CCC	3	69.02	C	54.24	CC	64.63	BB	79.53	软件和信息技术服务业	软件开发	横向通用软件
4	2012	国华网安	B	4	71.15	C	52.45	B	72.54	BB	79.77	软件和信息技术服务业	软件开发	横向通用软件
4	2013	国华网安	B	4	70.68	C	52.45	CC	61.64	A	86.09	软件和信息技术服务业	软件开发	横向通用软件
4	2014	国华网安	CCC	3	65.7	C	50.87	C	53.04	BBB	81.82	软件和信息技术服务业	软件开发	横向通用软件
4	2015	国华网安	CCC	3	66.18	C	52.66	C	58.1	BB	78.54	软件和信息技术服务业	软件开发	横向通用软件
4	2016	国华网安	CC	2	62.06	C	50.87	CC	63.13	CCC	67.06	软件和信息技术服务业	软件开发	横向通用软件
4	2017	国华网安	CCC	3	66.38	C	49.98	CC	60.78	BB	78.53	软件和信息技术服务业	软件开发	横向通用软件
4	2018	国华网安	C	1	58.76	C	49.98	C	57.74	CC	63.92	软件和信息技术服务业	软件开发	横向通用软件
4	2019	国华网安	CC	2	61.07	C	48.19	CC	64.8	CCC	65.13	软件和信息技术服务业	软件开发	横向通用软件
4	2020	国华网安	CCC	3	69.57	C	50.21	BB	75.88	BB	76.58	软件和信息技术服务业	软件开发	横向通用软件
4	2021	国华网安	B	4	74.59	C	56.14	B	72.97	BBB	81.49	软件和信息技术服务业	软件开发	横向通用软件
4	2022	国华网安	B	4	71.55	C	56.14	B	72.04	BB	75.84	软件和信息技术服务业	软件开发	横向通用软件
4	2023	国华网安	CCC	3	67.5	C	56.14	B	72.86	CCC	66.68	软件和信息技术服务业	软件开发	横向通用软件
4	2024	*ST国华	C	1	53.01	C	56.14	B	73.48	C	58.6	软件和信息技术服务业	横向通用软件	横向通用软件
5	2009	ST星源	CCC	3	67	C	56.79	C	56.17	BB	79.55	生态保护和环境治理业	综合环境治理	综合环境治理
5	2010	ST星源	CC	2	64.25	C	59.78	C	56.17	B	72.32	生态保护和环境治理业	综合环境治理	综合环境治理
5	2011	ST星源	CC	2	61.29	C	56.79	C	53.07	CCC	69.49	生态保护和环境治理业	综合环境治理	综合环境治理
5	2012	ST星源	CCC	3	67.32	C	55.11	CC	62.71	BB	75.91	生态保护和环境治理业	综合环境治理	综合环境治理
5	2013	ST星源	CC	2	63.37	C	55.11	C	51.52	BB	75.91	生态保护和环境治理业	综合环境治理	综合环境治理
5	2014	ST星源	CC	2	63.34	C	53.95	C	54.62	B	73.94	生态保护和环境治理业	综合环境治理	综合环境治理
5	2015	ST星源	CCC	3	66.77	C	58.62	C	59.28	BB	75.91	生态保护和环境治理业	综合环境治理	综合环境治理
5	2016	ST星源	CCC	3	65.25	C	59.26	C	59.28	B	72.32	生态保护和环境治理业	综合环境治理	综合环境治理
5	2017	ST星源	CCC	3	66.95	C	57.58	C	59.28	BB	76.72	生态保护和环境治理业	综合环境治理	综合环境治理
5	2018	ST星源	CC	2	63.94	C	54.06	C	59.28	B	71.6	生态保护和环境治理业	综合环境治理	综合环境治理
5	2019	ST星源	CCC	3	67.95	C	54.06	CCC	67.52	B	74.03	生态保护和环境治理业	综合环境治理	综合环境治理
5	2020	ST星源	CCC	3	65.29	C	52.9	CC	64.26	B	71.2	生态保护和环境治理业	综合环境治理	综合环境治理
5	2021	ST星源	CCC	3	67.16	C	59.88	B	70.14	B	74.05	生态保护和环境治理业	综合环境治理	综合环境治理
5	2022	ST星源	CCC	3	65.68	C	59.88	CCC	68.92	B	70.64	生态保护和环境治理业	综合环境治理	综合环境治理
5	2023	ST星源	CC	2	62.72	C	59.88	CCC	67.55	CC	63.2	生态保护和环境治理业	综合环境治理	综合环境治理
6	2009	深振业A	BB	5	77.53	CCC	69.01	A	85.68	B	72.63	房地产业	住宅开发	住宅开发
6	2010	深振业A	BB	5	77.84	CCC	67.21	A	86.1	B	73.52	房地产业	住宅开发	住宅开发
6	2011	深振业A	BBB	6	82.85	CCC	65.41	AA	90.86	BBB	81.02	房地产业	住宅开发	住宅开发
6	2012	深振业A	BBB	6	80.72	CCC	65.41	A	86.68	BBB	80.13	房地产业	住宅开发	住宅开发
6	2013	深振业A	BBB	6	80.09	CC	62.03	BBB	83.51	BBB	82.8	房地产业	住宅开发	住宅开发
6	2014	深振业A	BBB	6	81.06	CC	62.03	A	85.85	BBB	82.8	房地产业	住宅开发	住宅开发
6	2015	深振业A	BB	5	79.01	C	53.09	BBB	83.49	BBB	83.33	房地产业	住宅开发	住宅开发
6	2016	深振业A	BBB	6	81.37	C	57.3	A	86.77	BBB	84.19	房地产业	住宅开发	住宅开发
6	2017	深振业A	BBB	6	83.74	CC	61.58	AA	90.44	BBB	84.7	房地产业	住宅开发	住宅开发
6	2018	深振业A	BBB	6	82.34	CC	60	A	86.68	A	85.59	房地产业	住宅开发	住宅开发
6	2019	深振业A	BBB	6	82.77	CC	60	A	86.77	A	86.48	房地产业	住宅开发	住宅开发
6	2020	深振业A	BBB	6	83.39	C	56.75	A	86.43	A	89.28	房地产业	住宅开发	住宅开发
6	2021	深振业A	BB	5	75.11	CCC	68.59	BB	77.04	BB	78.77	房地产业	住宅开发	住宅开发
6	2022	深振业A	B	4	73.32	CCC	67.94	BB	75.43	BB	75.95	房地产业	住宅开发	住宅开发
6	2023	深振业A	BB	5	79.07	B	73.49	A	87.05	BB	77.42	房地产业	住宅开发	住宅开发
6	2024	深振业A	BBB	6	80.18	BB	76.63	BBB	82.85	BBB	81.1	房地产业	住宅开发	住宅开发
7	2009	*ST全新	B	4	70.6	C	55.11	B	74.97	B	71.56	房地产业	商业物业经营	商业物业经营
7	2010	*ST全新	B	4	71.44	C	55.11	B	74.97	B	73.48	房地产业	商业物业经营	商业物业经营
7	2011	*ST全新	B	4	71.83	C	56.47	B	72.63	BB	76.15	房地产业	商业物业经营	商业物业经营
7	2012	*ST全新	CCC	3	65.62	C	54.89	B	70.54	CC	64.51	房地产业	商业物业经营	商业物业经营
7	2013	*ST全新	B	4	71.92	CCC	65.02	BBB	83.32	CC	63.4	房地产业	商业物业经营	商业物业经营
7	2014	*ST全新	CCC	3	66.43	CCC	65.02	B	72.88	CC	60.8	房地产业	商业物业经营	商业物业经营
7	2015	*ST全新	CC	2	60.59	CC	63.44	B	72.88	C	48.02	房地产业	商业物业经营	商业物业经营
7	2016	*ST全新	CC	2	62.54	CCC	65.02	B	72.88	C	51.94	房地产业	商业物业经营	商业物业经营
7	2017	*ST全新	B	4	74.34	CCC	65.92	BBB	84.99	CCC	67.04	房地产业	商业物业经营	商业物业经营
7	2018	*ST全新	CCC	3	68.29	CC	60.97	B	74.55	CC	64.78	房地产业	商业物业经营	商业物业经营
7	2019	*ST全新	CCC	3	69.8	CC	60.97	B	74.55	CCC	68.22	房地产业	商业物业经营	商业物业经营
7	2020	*ST全新	CCC	3	66.13	CC	60.74	BB	78.72	C	56	房地产业	商业物业经营	商业物业经营
7	2021	*ST全新	CC	2	64.71	CCC	65.5	B	73.47	C	57.5	房地产业	商业物业经营	商业物业经营
7	2022	*ST全新	CCC	3	65.61	CCC	65.5	B	72.44	CC	60.55	房地产业	商业物业经营	商业物业经营
7	2023	*ST全新	CCC	3	67.16	CCC	65.5	B	73.3	CC	63.84	房地产业	商业物业经营	商业物业经营
7	2024	全新好	C	1	51.76	CCC	66.14	B	74.42	CC	60.23	房地产业	商业物业经营	商业物业经营
8	2009	神州高铁	B	4	72.35	C	45.9	CCC	66.35	A	89.9	铁路、船舶、航空航天和其他运输设备制造业	轨交设备	轨交设备Ⅲ
8	2010	神州高铁	B	4	71.87	C	45.9	CC	64.8	A	89.9	铁路、船舶、航空航天和其他运输设备制造业	轨交设备	轨交设备Ⅲ
8	2011	神州高铁	CCC	3	69.5	C	48.93	CC	63.69	BBB	83.92	铁路、船舶、航空航天和其他运输设备制造业	轨交设备	轨交设备Ⅲ
8	2012	神州高铁	CC	2	63.96	C	47.7	C	57.74	BB	76.45	铁路、船舶、航空航天和其他运输设备制造业	轨交设备	轨交设备Ⅲ
8	2013	神州高铁	CCC	3	68.17	C	45.9	CC	64.8	BBB	81.82	铁路、船舶、航空航天和其他运输设备制造业	轨交设备	轨交设备Ⅲ
8	2014	神州高铁	CCC	3	66.36	C	47.48	C	57.74	BBB	81.82	铁路、船舶、航空航天和其他运输设备制造业	轨交设备	轨交设备Ⅲ
8	2015	神州高铁	CCC	3	65.54	C	45.9	C	59.92	BB	79.36	铁路、船舶、航空航天和其他运输设备制造业	轨交设备	轨交设备Ⅲ
8	2016	神州高铁	B	4	71.75	C	49.49	BB	76.11	BBB	80.18	铁路、船舶、航空航天和其他运输设备制造业	轨交设备	轨交设备Ⅲ
8	2017	神州高铁	B	4	70.15	C	54.24	CC	64.35	BBB	82.17	铁路、船舶、航空航天和其他运输设备制造业	轨交设备	轨交设备Ⅲ
8	2018	神州高铁	B	4	71.78	C	54.24	BB	76.11	BB	77.81	铁路、船舶、航空航天和其他运输设备制造业	轨交设备	轨交设备Ⅲ
8	2019	神州高铁	B	4	72.59	C	58.86	B	73.76	BB	78.81	铁路、船舶、航空航天和其他运输设备制造业	轨交设备	轨交设备Ⅲ
8	2020	神州高铁	B	4	70.38	C	52.67	B	72.5	BB	78	铁路、船舶、航空航天和其他运输设备制造业	轨交设备	轨交设备Ⅲ
8	2021	神州高铁	BB	5	76.11	CCC	67.14	BB	76.67	BBB	81.25	铁路、船舶、航空航天和其他运输设备制造业	轨交设备	轨交设备Ⅲ
8	2022	神州高铁	B	4	72.78	CCC	67.28	BB	75.4	B	74.22	铁路、船舶、航空航天和其他运输设备制造业	轨交设备	轨交设备Ⅲ
8	2023	神州高铁	BB	5	79.43	BB	75.11	BBB	80.2	BBB	81.52	铁路、船舶、航空航天和其他运输设备制造业	轨交设备	轨交设备Ⅲ
8	2024	神州高铁	BB	5	78.54	BBB	80.71	BBB	82.23	BB	79.72	铁路、船舶、航空航天和其他运输设备制造业	轨交设备Ⅲ	轨交设备Ⅲ
9	2009	中国宝安	BB	5	78.94	CC	60.58	BBB	80.99	A	86.11	综合	电池	电池化学品
9	2010	中国宝安	B	4	74.27	C	55.27	BB	76.98	BBB	81.31	综合	电池	电池化学品
9	2011	中国宝安	CCC	3	69.12	CC	62.29	BBB	82.21	CC	63.75	综合	电池	电池化学品
9	2012	中国宝安	CCC	3	68.1	CC	60.58	BB	76.25	CCC	66.27	综合	电池	电池化学品
9	2013	中国宝安	B	4	72.14	CCC	65.39	BB	75.95	B	72.78	综合	电池	电池化学品
9	2014	中国宝安	B	4	72.9	C	52.5	BB	76.98	BB	79.7	综合	电池	电池化学品
9	2015	中国宝安	BB	5	77.59	CC	64.69	BB	78.2	BBB	83.16	综合	电池	电池化学品
9	2016	中国宝安	BB	5	75.92	C	59.52	BBB	80.67	BBB	80.42	综合	电池	电池化学品
9	2017	中国宝安	BB	5	78.01	B	70.55	BBB	80.86	BB	79.62	综合	电池	电池化学品
9	2018	中国宝安	B	4	74.46	C	57.99	BBB	81.44	BB	77.54	综合	电池	电池化学品
9	2019	中国宝安	BB	5	78.34	CCC	67.08	A	87.98	BB	77.28	综合	电池	电池化学品
9	2020	中国宝安	B	4	74.62	CC	61.58	BBB	80.2	BB	77.03	综合	电池	电池化学品
9	2021	中国宝安	B	4	71.64	C	59.53	BB	75.8	BB	77.94	综合	电池	电池化学品
9	2022	中国宝安	B	4	73.4	CCC	66.49	BB	75.34	BB	77.25	综合	电池	电池化学品
9	2023	中国宝安	BB	5	75.77	B	70.52	BB	76.48	BB	79.13	综合	电池	电池化学品
9	2024	中国宝安	C	1	53.91	C	58.61	BB	76.41	B	71.74	综合	电池化学品	电池化学品
10	2009	美丽生态	CC	2	62.71	C	44.88	CC	60.13	B	73.26	土木工程建筑业	装饰园林	园林工程
10	2010	美丽生态	CC	2	60.22	C	44.88	C	55.1	B	71.27	土木工程建筑业	装饰园林	园林工程
10	2011	美丽生态	CC	2	60.49	C	47.68	C	55.1	B	70.48	土木工程建筑业	装饰园林	园林工程
10	2012	美丽生态	CC	2	62.16	C	49.08	C	57.95	B	71.47	土木工程建筑业	装饰园林	园林工程
10	2013	美丽生态	CC	2	64.95	C	50.95	C	59.44	BB	75.6	土木工程建筑业	装饰园林	园林工程
10	2014	美丽生态	CCC	3	66.86	C	53.99	C	57.95	BB	79.25	土木工程建筑业	装饰园林	园林工程
10	2015	美丽生态	CC	2	60.66	C	50.95	C	50.68	B	72.22	土木工程建筑业	装饰园林	园林工程
10	2016	美丽生态	CC	2	60.43	C	52.59	C	57.95	CCC	65.97	土木工程建筑业	装饰园林	园林工程
10	2017	美丽生态	C	1	55.29	C	49.93	C	59.92	C	54.8	土木工程建筑业	装饰园林	园林工程
10	2018	美丽生态	CC	2	60.9	C	51.57	CCC	65.77	CC	62.21	土木工程建筑业	装饰园林	园林工程
10	2019	美丽生态	C	1	55.78	C	54.5	CCC	66.77	C	48.97	土木工程建筑业	装饰园林	园林工程
10	2020	美丽生态	C	1	50.76	C	52.65	CC	63.15	C	41.45	土木工程建筑业	装饰园林	园林工程
10	2021	美丽生态	CC	2	64.97	CC	60.03	BB	75.34	CC	61.7	土木工程建筑业	装饰园林	园林工程
10	2022	美丽生态	CCC	3	68.75	CC	60.03	BB	76.27	B	70.64	土木工程建筑业	装饰园林	园林工程
10	2023	美丽生态	CC	2	62.41	CC	60.03	B	74.3	C	55.97	土木工程建筑业	装饰园林	园林工程
10	2024	美丽生态	C	1	50.86	CC	64.42	B	72.96	C	57.35	土木工程建筑业	装饰园林	园林工程
11	2009	深物业A	B	4	74.07	C	56.24	BB	76.8	BB	77.35	房地产业	住宅开发	住宅开发
11	2010	深物业A	CCC	3	69.11	C	53.09	BB	77.64	CCC	66.31	房地产业	住宅开发	住宅开发
11	2011	深物业A	B	4	72.6	C	56.24	BB	79.31	B	71.64	房地产业	住宅开发	住宅开发
11	2012	深物业A	B	4	72.14	C	54.67	B	74.71	BB	75.45	房地产业	住宅开发	住宅开发
11	2013	深物业A	BB	5	75.23	C	53.09	BB	76.8	BBB	81.04	房地产业	住宅开发	住宅开发
11	2014	深物业A	BB	5	77.52	C	56.91	BBB	80.98	BBB	81.04	房地产业	住宅开发	住宅开发
11	2015	深物业A	BB	5	76.96	CCC	65.02	BB	76.8	BBB	81.04	房地产业	住宅开发	住宅开发
11	2016	深物业A	B	4	73.24	CC	60.06	B	70.54	BBB	80.15	房地产业	住宅开发	住宅开发
11	2017	深物业A	BB	5	76.7	CC	60.97	BB	77.05	BBB	81.55	房地产业	住宅开发	住宅开发
11	2018	深物业A	BB	5	78.36	C	57.81	BBB	83.32	BBB	80.45	房地产业	住宅开发	住宅开发
11	2019	深物业A	B	4	73.32	C	55.57	BBB	81.23	B	71.68	房地产业	住宅开发	住宅开发
11	2020	深物业A	BB	5	76.46	C	57.14	A	85.82	B	73.96	房地产业	住宅开发	住宅开发
11	2021	深物业A	B	4	73.13	CCC	65.5	B	74.85	BB	77.82	房地产业	住宅开发	住宅开发
11	2022	深物业A	B	4	71.84	CCC	65.5	BB	75.03	B	74.42	房地产业	住宅开发	住宅开发
11	2023	深物业A	BB	5	76.3	B	72.23	BBB	80.6	BB	76.25	房地产业	住宅开发	住宅开发
11	2024	深物业A	B	4	71.4	B	73	BB	75.23	BB	78.52	房地产业	住宅开发	住宅开发
12	2009	南玻A	BB	5	78.88	CCC	67.13	BBB	80.16	BBB	84.02	非金属矿物制品业	玻璃玻纤	玻璃制造
12	2010	南玻A	BB	5	77.98	CCC	65.55	BB	78.44	BBB	84.02	非金属矿物制品业	玻璃玻纤	玻璃制造
12	2011	南玻A	BBB	6	80.12	B	72.78	BBB	82.87	BBB	82.02	非金属矿物制品业	玻璃玻纤	玻璃制造
12	2012	南玻A	BB	5	77.63	CCC	65.55	BB	77.3	BBB	84.02	非金属矿物制品业	玻璃玻纤	玻璃制造
12	2013	南玻A	B	4	73.29	C	53.65	B	72.25	BBB	84.02	非金属矿物制品业	玻璃玻纤	玻璃制造
12	2014	南玻A	B	4	73.86	CCC	65.55	CCC	68.04	BBB	82.02	非金属矿物制品业	玻璃玻纤	玻璃制造
12	2015	南玻A	BB	5	76.32	CC	63.97	BB	77.23	BBB	82.02	非金属矿物制品业	玻璃玻纤	玻璃制造
12	2016	南玻A	BB	5	75.96	CC	62.39	BB	77.23	BBB	82.02	非金属矿物制品业	玻璃玻纤	玻璃制造
12	2017	南玻A	BB	5	78.31	CCC	65.46	BB	79.58	BBB	84.02	非金属矿物制品业	玻璃玻纤	玻璃制造
12	2018	南玻A	BB	5	78.3	CCC	69.76	BBB	81.3	BBB	80.65	非金属矿物制品业	玻璃玻纤	玻璃制造
12	2019	南玻A	BB	5	77.28	BB	75.81	B	70.17	BBB	82.83	非金属矿物制品业	玻璃玻纤	玻璃制造
12	2020	南玻A	BB	5	77.66	B	72.59	B	74.11	BBB	82.65	非金属矿物制品业	玻璃玻纤	玻璃制造
12	2021	南玻A	B	4	71	C	57.1	BB	77.34	BBB	82.08	非金属矿物制品业	玻璃玻纤	玻璃制造
12	2022	南玻A	CCC	3	69.36	C	56.94	B	74.45	BB	79.58	非金属矿物制品业	玻璃玻纤	玻璃制造
12	2023	南玻A	B	4	71.67	C	57.52	BB	76.55	BBB	83.81	非金属矿物制品业	玻璃玻纤	玻璃制造
12	2024	南玻A	CC	2	63.84	CC	60.53	BBB	83.45	BB	76.77	非金属矿物制品业	玻璃玻纤	玻璃制造
14	2009	沙河股份	B	4	73.44	C	53.09	BB	76.8	BB	76.97	房地产业	住宅开发	住宅开发
14	2010	沙河股份	B	4	72.69	C	59.84	B	72.63	BB	76.97	房地产业	住宅开发	住宅开发
14	2011	沙河股份	B	4	73.27	C	51.51	B	72.63	BBB	81.04	房地产业	住宅开发	住宅开发
14	2012	沙河股份	BB	5	76.84	C	54.89	BBB	80.98	BBB	80.15	房地产业	住宅开发	住宅开发
14	2013	沙河股份	CCC	3	65.69	C	51.51	B	74.71	CC	61.81	房地产业	住宅开发	住宅开发
14	2014	沙河股份	BB	5	75.78	C	53.31	BBB	84.32	BB	75.11	房地产业	住宅开发	住宅开发
14	2015	沙河股份	B	4	73.83	C	51.51	BB	78.06	BB	77.18	房地产业	住宅开发	住宅开发
14	2016	沙河股份	B	4	72.01	C	51.51	B	74.3	BB	76.59	房地产业	住宅开发	住宅开发
14	2017	沙河股份	B	4	73.15	C	52.41	BB	75.8	BB	77.48	房地产业	住宅开发	住宅开发
14	2018	沙河股份	B	4	73.09	C	54.21	B	74.71	BB	77.78	房地产业	住宅开发	住宅开发
14	2019	沙河股份	B	4	71.57	C	52.41	B	72.63	BB	76.89	房地产业	住宅开发	住宅开发
14	2020	沙河股份	B	4	73.31	C	52.41	BB	76.8	BB	76.89	房地产业	住宅开发	住宅开发
14	2021	沙河股份	B	4	72.33	CCC	65.5	B	72.44	BB	77.59	房地产业	住宅开发	住宅开发
14	2022	沙河股份	B	4	72.84	CCC	65.5	B	73.88	BB	77.81	房地产业	住宅开发	住宅开发
14	2023	沙河股份	BB	5	79.33	B	73.67	BBB	81.54	BBB	82.11	房地产业	住宅开发	住宅开发
14	2024	沙河股份	A	7	86.69	BB	77.58	BBB	83.34	A	88.04	房地产业	住宅开发	住宅开发
16	2009	深康佳A	B	4	70.78	C	52.93	CC	64.98	BBB	83.81	计算机、通信和其他电子设备制造业	彩电	彩电
16	2010	深康佳A	CC	2	64.06	C	59.21	B	71.68	CC	61.41	计算机、通信和其他电子设备制造业	彩电	彩电
16	2011	深康佳A	CCC	3	68.67	CC	62.37	CCC	68.83	B	71.79	计算机、通信和其他电子设备制造业	彩电	彩电
16	2012	深康佳A	B	4	70.88	CC	63.95	CCC	66.47	BB	77.39	计算机、通信和其他电子设备制造业	彩电	彩电
16	2013	深康佳A	B	4	74.56	CCC	65.74	B	71.18	BBB	81.36	计算机、通信和其他电子设备制造业	彩电	彩电
16	2014	深康佳A	B	4	73.75	CCC	65.74	CCC	67.33	BBB	82.17	计算机、通信和其他电子设备制造业	彩电	彩电
16	2015	深康佳A	B	4	72.73	CC	64.16	CC	62.27	BBB	84.17	计算机、通信和其他电子设备制造业	彩电	彩电
16	2016	深康佳A	B	4	72.22	CCC	69	CC	64.63	BB	78.98	计算机、通信和其他电子设备制造业	彩电	彩电
16	2017	深康佳A	B	4	74.07	B	70.39	CC	64.86	BBB	82.17	计算机、通信和其他电子设备制造业	彩电	彩电
16	2018	深康佳A	B	4	74.26	B	70.39	CCC	68.7	BB	79.99	计算机、通信和其他电子设备制造业	彩电	彩电
16	2019	深康佳A	B	4	73.47	B	73.55	B	71.05	BB	75.07	计算机、通信和其他电子设备制造业	彩电	彩电
16	2020	深康佳A	B	4	71.84	B	73.55	CC	63.54	BB	76.57	计算机、通信和其他电子设备制造业	彩电	彩电
16	2021	深康佳A	B	4	73.24	CC	62.45	BB	76.67	BB	76.44	计算机、通信和其他电子设备制造业	彩电	彩电
16	2022	深康佳A	B	4	73.04	CC	62.45	BB	76.23	BB	76.33	计算机、通信和其他电子设备制造业	彩电	彩电
16	2023	深康佳A	BB	5	76.9	B	72.33	A	85.65	B	71.79	计算机、通信和其他电子设备制造业	彩电	彩电
16	2024	深康佳A	B	4	71.51	B	73.47	A	87.1	CCC	68.24	计算机、通信和其他电子设备制造业	冰洗	冰洗
17	2009	深中华A	CC	2	61.82	C	46.19	C	58.2	B	72.25	铁路、船舶、航空航天和其他运输设备制造业	饰品	钟表珠宝
17	2010	深中华A	CC	2	60.6	C	46.19	C	53.04	B	73.07	铁路、船舶、航空航天和其他运输设备制造业	饰品	钟表珠宝
17	2011	深中华A	CC	2	63.73	C	49.77	CC	60.45	B	73.07	铁路、船舶、航空航天和其他运输设备制造业	饰品	钟表珠宝
17	2012	深中华A	CC	2	63.35	C	49.77	CC	60.45	B	72.25	铁路、船舶、航空航天和其他运输设备制造业	饰品	钟表珠宝
17	2013	深中华A	CC	2	61.71	C	47.98	C	56.75	B	72.07	铁路、船舶、航空航天和其他运输设备制造业	饰品	钟表珠宝
17	2014	深中华A	CC	2	63.75	C	51.35	C	53.04	BB	77.31	铁路、船舶、航空航天和其他运输设备制造业	饰品	钟表珠宝
17	2015	深中华A	CCC	3	66.35	C	47.98	CC	60.1	BB	79.95	铁路、船舶、航空航天和其他运输设备制造业	饰品	钟表珠宝
17	2016	深中华A	CC	2	62.11	C	47.98	CCC	67.28	CCC	65.83	铁路、船舶、航空航天和其他运输设备制造业	饰品	钟表珠宝
17	2017	深中华A	CC	2	62.99	C	49.36	C	57.74	B	73.49	铁路、船舶、航空航天和其他运输设备制造业	饰品	钟表珠宝
17	2018	深中华A	CC	2	63.39	C	47.57	CC	61.18	B	72.94	铁路、船舶、航空航天和其他运输设备制造业	饰品	钟表珠宝
17	2019	深中华A	CC	2	63.44	C	49.36	CC	63.54	B	70.57	铁路、船舶、航空航天和其他运输设备制造业	饰品	钟表珠宝
17	2020	深中华A	CC	2	64.52	C	49.36	CCC	68.24	CCC	69.75	铁路、船舶、航空航天和其他运输设备制造业	饰品	钟表珠宝
17	2021	深中华A	CCC	3	68.18	CC	60.95	CCC	68.23	B	72.32	铁路、船舶、航空航天和其他运输设备制造业	饰品	钟表珠宝
17	2022	深中华A	CCC	3	66.07	CC	60.95	CCC	65.22	CCC	69.65	铁路、船舶、航空航天和其他运输设备制造业	饰品	钟表珠宝
17	2023	深中华A	CCC	3	68.61	C	59.9	CC	64.57	BB	76.59	铁路、船舶、航空航天和其他运输设备制造业	饰品	钟表珠宝
17	2024	深中华A	CC	2	61.59	C	59.38	B	70.39	BB	77.52	铁路、船舶、航空航天和其他运输设备制造业	饰品	钟表珠宝
19	2009	深粮控股	B	4	73.12	C	52.87	B	70.68	A	85.09	批发业	粮油加工	粮油加工
19	2010	深粮控股	B	4	70.38	C	52.87	CCC	67.77	BBB	81.08	批发业	粮油加工	粮油加工
19	2011	深粮控股	BB	5	75.88	C	56.03	BB	76.01	A	85.91	批发业	粮油加工	粮油加工
19	2012	深粮控股	B	4	74.43	C	56.03	B	73.76	BBB	84.28	批发业	粮油加工	粮油加工
19	2013	深粮控股	B	4	74.16	C	56.03	B	72.9	BBB	84.28	批发业	粮油加工	粮油加工
19	2014	深粮控股	B	4	72.58	C	56.03	CCC	67.51	BBB	84.45	批发业	粮油加工	粮油加工
19	2015	深粮控股	B	4	70.28	C	56.03	C	59.1	A	85.09	批发业	粮油加工	粮油加工
19	2016	深粮控股	CCC	3	69.59	C	54.45	CC	62.8	BBB	81.9	批发业	粮油加工	粮油加工
19	2017	深粮控股	CCC	3	68.33	C	50.79	C	56.75	A	85.09	批发业	粮油加工	粮油加工
19	2018	深粮控股	CCC	3	67.8	C	50.79	CC	63	BB	79.72	批发业	粮油加工	粮油加工
19	2019	深粮控股	B	4	74.36	C	46.26	AAA	100	BB	77.95	批发业	粮油加工	粮油加工
19	2020	深粮控股	B	4	73.84	C	46.26	AAA	95.12	BB	78.64	批发业	粮油加工	粮油加工
19	2021	深粮控股	B	4	71.65	C	59.07	BB	76.64	BBB	81.25	批发业	粮油加工	粮油加工
19	2022	深粮控股	B	4	72.44	C	59.07	B	74.14	A	85.08	批发业	粮油加工	粮油加工
19	2023	深粮控股	CCC	3	69.78	C	59.07	B	70.39	BBB	80.4	批发业	粮油加工	粮油加工
19	2024	深粮控股	B	4	70.01	C	58.58	BB	78.02	BBB	84.42	批发业	粮油加工	粮油加工
20	2009	深华发A	BB	5	76.9	CC	63.1	BB	75.89	BBB	84.63	计算机、通信和其他电子设备制造业	面板	面板
20	2010	深华发A	CCC	3	69.87	CC	61.52	C	55.53	BBB	83.81	计算机、通信和其他电子设备制造业	面板	面板
20	2011	深华发A	CCC	3	67.75	C	49.35	CC	62.58	BBB	80.64	计算机、通信和其他电子设备制造业	面板	面板
20	2012	深华发A	CC	2	63.74	C	54.3	C	55.39	B	74.2	计算机、通信和其他电子设备制造业	面板	面板
20	2013	深华发A	CCC	3	65.63	C	54.3	CC	62.45	B	73.56	计算机、通信和其他电子设备制造业	面板	面板
20	2014	深华发A	CC	2	64.22	C	51.14	C	57.74	BB	75.27	计算机、通信和其他电子设备制造业	面板	面板
20	2015	深华发A	CCC	3	68.52	C	50.93	CCC	65.07	BB	79.82	计算机、通信和其他电子设备制造业	面板	面板
20	2016	深华发A	C	1	54.76	C	50.93	C	59.92	C	53.22	计算机、通信和其他电子设备制造业	面板	面板
20	2017	深华发A	C	1	57.32	C	52.31	CCC	68.24	C	52.5	计算机、通信和其他电子设备制造业	面板	面板
20	2018	深华发A	CC	2	61.56	C	47.54	CCC	65.89	CCC	65.79	计算机、通信和其他电子设备制造业	面板	面板
20	2019	深华发A	CC	2	61.97	C	47.15	CC	63.54	CCC	68.49	计算机、通信和其他电子设备制造业	面板	面板
20	2020	深华发A	CC	2	64.39	C	47.15	CC	61.18	BB	75.36	计算机、通信和其他电子设备制造业	面板	面板
20	2021	深华发A	B	4	70.31	CCC	67.11	CCC	68.37	B	73.37	计算机、通信和其他电子设备制造业	面板	面板
20	2022	深华发A	B	4	71.54	CCC	67.11	CCC	68.97	BB	75.69	计算机、通信和其他电子设备制造业	面板	面板
20	2023	深华发A	CCC	3	65.08	CC	64.19	CCC	66.87	CC	64.26	计算机、通信和其他电子设备制造业	面板	面板
20	2024	深华发A	C	1	52.72	CC	64.19	B	70.03	CC	63.98	计算机、通信和其他电子设备制造业	面板	面板
21	2009	深科技	B	4	74.24	C	55.88	B	70.82	A	85.91	计算机、通信和其他电子设备制造业	消费电子零部件及组装	消费电子零部件及组装
21	2010	深科技	BB	5	75.25	CC	62.93	CCC	69.96	A	85.09	计算机、通信和其他电子设备制造业	消费电子零部件及组装	消费电子零部件及组装
21	2011	深科技	BB	5	79.39	B	70.5	BB	76.81	A	85.66	计算机、通信和其他电子设备制造业	消费电子零部件及组装	消费电子零部件及组装
21	2012	深科技	BB	5	79.66	B	70.5	BB	78.92	BBB	84.84	计算机、通信和其他电子设备制造业	消费电子零部件及组装	消费电子零部件及组装
21	2013	深科技	BB	5	77.69	CCC	67.13	B	71.01	A	87.6	计算机、通信和其他电子设备制造业	消费电子零部件及组装	消费电子零部件及组装
21	2014	深科技	BB	5	76.44	CCC	65.34	B	72.38	BBB	84.84	计算机、通信和其他电子设备制造业	消费电子零部件及组装	消费电子零部件及组装
21	2015	深科技	BBB	6	80.33	CCC	65.34	A	85	BBB	84.84	计算机、通信和其他电子设备制造业	消费电子零部件及组装	消费电子零部件及组装
21	2016	深科技	BBB	6	81.37	B	71.37	A	85	BBB	84.02	计算机、通信和其他电子设备制造业	消费电子零部件及组装	消费电子零部件及组装
21	2017	深科技	BBB	6	81.92	CCC	65.42	AA	91.31	BBB	84.02	计算机、通信和其他电子设备制造业	消费电子零部件及组装	消费电子零部件及组装
21	2018	深科技	BB	5	77.07	CC	64.05	BB	79.87	BBB	81.83	计算机、通信和其他电子设备制造业	消费电子零部件及组装	消费电子零部件及组装
21	2019	深科技	BB	5	77.44	CCC	65.63	BB	79.87	BBB	81.83	计算机、通信和其他电子设备制造业	消费电子零部件及组装	消费电子零部件及组装
21	2020	深科技	BBB	6	82.6	B	71.18	A	88.28	BBB	84.59	计算机、通信和其他电子设备制造业	消费电子零部件及组装	消费电子零部件及组装
21	2021	深科技	BB	5	77.58	CCC	67.92	BB	78.58	BBB	82.14	计算机、通信和其他电子设备制造业	消费电子零部件及组装	消费电子零部件及组装
21	2022	深科技	BB	5	77.3	CCC	68.39	BB	78.82	BBB	80.98	计算机、通信和其他电子设备制造业	消费电子零部件及组装	消费电子零部件及组装
21	2023	深科技	BB	5	78.49	CCC	68.85	BB	79.59	BBB	82.96	计算机、通信和其他电子设备制造业	消费电子零部件及组装	消费电子零部件及组装
21	2024	深科技	A	7	87.74	BB	76.79	A	88.22	A	87.15	计算机、通信和其他电子设备制造业	消费电子零部件及组装	消费电子零部件及组装
23	2009	ST深天	CCC	3	68.88	C	48.59	B	72.45	BB	76.83	非金属矿物制品业	水泥	水泥制品
23	2010	ST深天	CCC	3	68.26	C	56.78	CC	63.96	BB	77.01	非金属矿物制品业	水泥	水泥制品
23	2011	ST深天	B	4	70.91	C	45.76	BB	76.17	BBB	80.21	非金属矿物制品业	水泥	水泥制品
23	2012	ST深天	CCC	3	67.58	C	58.7	CCC	66.67	B	72.74	非金属矿物制品业	水泥	水泥制品
23	2013	ST深天	CC	2	64.7	C	45.76	CCC	68.66	B	71.69	非金属矿物制品业	水泥	水泥制品
23	2014	ST深天	CCC	3	67.84	C	52.51	B	70.47	B	73.89	非金属矿物制品业	水泥	水泥制品
23	2015	ST深天	CCC	3	69.59	C	52.51	B	72.82	BB	76.14	非金属矿物制品业	水泥	水泥制品
23	2016	ST深天	C	1	57.61	C	48.92	B	70.68	C	53.22	非金属矿物制品业	水泥	水泥制品
23	2017	ST深天	CC	2	63.04	C	53.89	CCC	65.75	CCC	65.88	非金属矿物制品业	水泥	水泥制品
23	2018	ST深天	CCC	3	67.01	C	57.26	CCC	68.1	B	71.26	非金属矿物制品业	水泥	水泥制品
23	2019	ST深天	CC	2	61.12	C	58.51	CC	62.94	CC	61.24	非金属矿物制品业	水泥	水泥制品
23	2020	ST深天	CC	2	63.54	CC	63.46	CC	62.94	CC	63.98	非金属矿物制品业	水泥	水泥制品
23	2021	ST深天	CCC	3	68.04	CC	61.85	BB	75.77	B	70.17	非金属矿物制品业	水泥	水泥制品
23	2022	ST深天	CCC	3	66.25	CC	61.85	B	74.22	CCC	66.12	非金属矿物制品业	水泥	水泥制品
23	2023	ST深天	CC	2	60.46	CC	61.54	B	72.57	C	51.24	非金属矿物制品业	水泥	水泥制品
25	2009	特力A	B	4	72.66	C	55.34	BB	75.58	BB	79.11	批发业	综合Ⅲ	综合Ⅲ
25	2010	特力A	B	4	73.09	C	53.35	BBB	80.46	BB	79.11	批发业	综合Ⅲ	综合Ⅲ
25	2011	特力A	B	4	71.9	C	55.34	BBB	80.46	BB	76.17	批发业	综合Ⅲ	综合Ⅲ
25	2012	特力A	B	4	70.92	C	55.34	BBB	80.46	B	74.44	批发业	综合Ⅲ	综合Ⅲ
25	2013	特力A	B	4	73.97	C	55.25	A	85.35	BB	78.24	批发业	综合Ⅲ	综合Ⅲ
25	2014	特力A	B	4	74.75	C	57.23	A	85.35	BB	78.76	批发业	综合Ⅲ	综合Ⅲ
25	2015	特力A	B	4	72.94	C	49.47	BBB	80.46	BBB	80.49	批发业	综合Ⅲ	综合Ⅲ
25	2016	特力A	CCC	3	68.58	C	49.47	A	85.35	B	71.25	批发业	综合Ⅲ	综合Ⅲ
25	2017	特力A	B	4	72.69	C	53.92	A	85.35	BB	76.56	批发业	综合Ⅲ	综合Ⅲ
25	2018	特力A	B	4	71.11	C	50.04	BB	75.58	BB	78.64	批发业	综合Ⅲ	综合Ⅲ
25	2019	特力A	B	4	74.3	C	48.15	AAA	95.12	BB	78.64	批发业	综合Ⅲ	综合Ⅲ
25	2020	特力A	B	4	74.69	C	54.01	A	85.35	BBB	80.03	批发业	综合Ⅲ	综合Ⅲ
25	2021	特力A	B	4	72.77	CC	63.3	B	70.99	BB	78.18	批发业	综合Ⅲ	综合Ⅲ
25	2022	特力A	B	4	72.81	CC	63.3	B	71.33	BB	78.02	批发业	综合Ⅲ	综合Ⅲ
25	2023	特力A	B	4	71.77	CC	63.3	B	73.01	B	74.54	批发业	综合Ⅲ	综合Ⅲ
25	2024	特力A	C	1	58.73	CC	63.3	B	71.04	BB	78.27	批发业	综合Ⅲ	综合Ⅲ
26	2009	飞亚达	BBB	6	80.3	C	56.31	AAA	100	BBB	84.09	零售业	饰品	钟表珠宝
26	2010	飞亚达	BBB	6	80.98	C	56.31	AAA	95.12	A	86.88	零售业	饰品	钟表珠宝
26	2011	飞亚达	BB	5	79.82	C	54.32	AAA	100	BBB	84.09	零售业	饰品	钟表珠宝
26	2012	飞亚达	BB	5	75.65	C	47.67	AAA	100	BB	79.61	零售业	饰品	钟表珠宝
26	2013	飞亚达	BB	5	76.88	C	47.67	AAA	100	BBB	81.77	零售业	饰品	钟表珠宝
26	2014	飞亚达	BB	5	75.32	C	45.69	AA	90.23	BBB	83.1	零售业	饰品	钟表珠宝
26	2015	飞亚达	BB	5	75.59	C	49.57	AAA	95.12	BBB	80.31	零售业	饰品	钟表珠宝
26	2016	飞亚达	BB	5	77.35	C	58.92	AA	90.23	BBB	81	零售业	饰品	钟表珠宝
26	2017	飞亚达	BB	5	75.04	C	57.6	A	85.35	BB	79.11	零售业	饰品	钟表珠宝
26	2018	飞亚达	B	4	73.21	C	46.26	AA	90.23	BB	79.15	零售业	饰品	钟表珠宝
26	2019	飞亚达	BB	5	75.95	C	56.92	A	85.35	BBB	81	零售业	饰品	钟表珠宝
26	2020	飞亚达	BB	5	75.95	C	56.92	A	85.35	BBB	81	零售业	饰品	钟表珠宝
26	2021	飞亚达	B	4	70.97	CC	60.72	CCC	69.89	BB	78.98	零售业	饰品	钟表珠宝
26	2022	飞亚达	B	4	73.06	CC	60.72	B	71.4	BBB	82.96	零售业	饰品	钟表珠宝
26	2023	飞亚达	B	4	71.92	CC	60.72	CCC	69.27	BBB	81.73	零售业	饰品	钟表珠宝
26	2024	飞亚达	BBB	6	84.76	BB	77.52	BB	79.55	A	87.24	零售业	饰品	钟表珠宝
27	2009	深圳能源	BBB	6	81.03	CCC	65.41	A	85.03	A	86.13	电力、热力生产和供应业	火电	火力发电
27	2010	深圳能源	B	4	71.11	CCC	65.41	C	51.64	A	85.37	电力、热力生产和供应业	火电	火力发电
27	2011	深圳能源	B	4	71.6	CCC	66.78	C	52.28	A	85.37	电力、热力生产和供应业	火电	火力发电
27	2012	深圳能源	BB	5	77.81	CCC	65.41	BB	75.05	A	85.37	电力、热力生产和供应业	火电	火力发电
27	2013	深圳能源	B	4	74.34	CC	64.05	CCC	69.6	BBB	82.07	电力、热力生产和供应业	火电	火力发电
27	2014	深圳能源	BB	5	77.04	CCC	65.41	B	73.65	BBB	84.61	电力、热力生产和供应业	火电	火力发电
27	2015	深圳能源	BB	5	78.13	CCC	65.41	BB	78.71	BBB	83.86	电力、热力生产和供应业	火电	火力发电
27	2016	深圳能源	B	4	70.82	CCC	66.78	C	53.38	BBB	83.1	电力、热力生产和供应业	火电	火力发电
27	2017	深圳能源	B	4	73.38	CCC	65.41	CCC	65.67	BBB	81.75	电力、热力生产和供应业	火电	火力发电
27	2018	深圳能源	BB	5	77.99	CCC	65.22	BB	79.67	BBB	83.1	电力、热力生产和供应业	火电	火力发电
27	2019	深圳能源	BBB	6	81.05	CCC	65.22	AA	90.36	BBB	83.1	电力、热力生产和供应业	火电	火力发电
27	2020	深圳能源	BBB	6	80.59	CCC	67.55	A	86.85	BBB	83.1	电力、热力生产和供应业	火电	火力发电
27	2021	深圳能源	B	4	71.42	CC	64.26	CCC	66.41	BBB	81.87	电力、热力生产和供应业	火电	火力发电
27	2022	深圳能源	CCC	3	69.69	CC	62.6	CCC	66.07	BB	79.32	电力、热力生产和供应业	火电	火力发电
27	2023	深圳能源	BBB	6	81.9	BB	79.43	A	85.02	BBB	82.94	电力、热力生产和供应业	火电	火力发电
27	2024	深圳能源	BB	5	77.76	B	74.23	A	85.94	BBB	82.2	电力、热力生产和供应业	火电	火力发电
28	2009	国药一致	BB	5	79.58	CCC	65.96	AAA	95.12	BBB	80.31	批发业	医药商业Ⅲ	医药流通
28	2010	国药一致	B	4	72.22	C	52.34	BB	75.58	BB	79.61	批发业	医药商业Ⅲ	医药流通
28	2011	国药一致	BB	5	76.56	C	58.3	AAA	100	BB	76.68	批发业	医药商业Ⅲ	医药流通
28	2012	国药一致	B	4	72.99	C	58.3	A	85.35	BB	75.21	批发业	医药商业Ⅲ	医药流通
28	2013	国药一致	B	4	73.88	C	58.01	AA	90.23	BB	75.29	批发业	医药商业Ⅲ	医药流通
28	2014	国药一致	BB	5	76.99	CCC	67.56	AA	90.23	BB	76.68	批发业	医药商业Ⅲ	医药流通
28	2015	国药一致	B	4	72.43	C	49.47	AAA	95.12	B	74.79	批发业	医药商业Ⅲ	医药流通
28	2016	国药一致	BB	5	79.39	CCC	67.56	BBB	80.46	BBB	84.09	批发业	医药商业Ⅲ	医药流通
28	2017	国药一致	A	7	86.8	BB	77.78	AAA	100	A	86.33	批发业	医药商业Ⅲ	医药流通
28	2018	国药一致	BB	5	77.51	C	52.91	AAA	95.12	BBB	82.24	批发业	医药商业Ⅲ	医药流通
28	2019	国药一致	BB	5	79.45	C	52.09	AAA	100	BBB	84.4	批发业	医药商业Ⅲ	医药流通
28	2020	国药一致	BB	5	75.16	C	46.26	AAA	95.12	BBB	80.96	批发业	医药商业Ⅲ	医药流通
28	2021	国药一致	BB	5	75.83	C	56.64	BBB	84.83	BB	77.75	批发业	医药商业Ⅲ	医药流通
28	2022	国药一致	B	4	74.59	C	56.64	BB	79.6	BB	79.12	批发业	医药商业Ⅲ	医药流通
28	2023	国药一致	B	4	74.43	C	56.64	BB	79.72	BB	78.65	批发业	医药商业Ⅲ	医药流通
28	2024	国药一致	BBB	6	82.29	BB	75.91	BBB	82.48	BBB	81.57	批发业	医药流通	医药流通
29	2009	深深房A	BB	5	77.93	C	51.51	BBB	82.9	BBB	81.93	房地产业	住宅开发	住宅开发
29	2010	深深房A	BB	5	75.93	C	51.51	BB	79.98	BBB	80.15	房地产业	住宅开发	住宅开发
29	2011	深深房A	BB	5	76.94	C	53.09	BB	79.98	BBB	81.93	房地产业	住宅开发	住宅开发
29	2012	深深房A	BB	5	76.59	C	54.89	BBB	80.39	BBB	80.15	房地产业	住宅开发	住宅开发
29	2013	深深房A	BB	5	75.47	C	59.84	BBB	80.39	BB	75.95	房地产业	住宅开发	住宅开发
29	2014	深深房A	BB	5	76.19	C	53.31	BB	79.98	BBB	80.15	房地产业	住宅开发	住宅开发
29	2015	深深房A	BB	5	77.74	C	53.31	BBB	81.81	BBB	81.93	房地产业	住宅开发	住宅开发
29	2016	深深房A	BB	5	76.71	C	51.51	BB	79.98	BBB	81.93	房地产业	住宅开发	住宅开发
29	2017	深深房A	BBB	6	80.36	C	52.41	A	87.5	BBB	82.82	房地产业	住宅开发	住宅开发
29	2018	深深房A	BB	5	76.71	C	52.41	BBB	81.23	BBB	80.45	房地产业	住宅开发	住宅开发
29	2019	深深房A	BB	5	77.93	C	52.41	BBB	84.15	BBB	80.45	房地产业	住宅开发	住宅开发
29	2020	深深房A	BB	5	77.72	C	52.41	BBB	81.23	BBB	82.73	房地产业	住宅开发	住宅开发
29	2021	深深房A	B	4	74.37	CCC	65.5	B	73.13	BBB	82.26	房地产业	住宅开发	住宅开发
29	2022	深深房A	B	4	74.8	CCC	65.5	B	74.11	BBB	82.62	房地产业	住宅开发	住宅开发
29	2023	深深房A	BB	5	77.45	B	72.15	BB	77.41	BBB	81.63	房地产业	住宅开发	住宅开发
29	2024	深深房A	B	4	71.29	CCC	69.49	BB	77.88	BB	79.25	房地产业	住宅开发	住宅开发
30	2009	富奥股份	C	1	57.7	C	45.76	C	53.04	CCC	66.94	汽车制造业	汽车零部件Ⅲ	底盘与发动机系统
30	2010	富奥股份	C	1	57.04	C	49.35	C	53.04	CC	63.66	汽车制造业	汽车零部件Ⅲ	底盘与发动机系统
30	2011	富奥股份	CC	2	64.94	C	49.35	C	57.74	BB	77.75	汽车制造业	汽车零部件Ⅲ	底盘与发动机系统
30	2012	富奥股份	C	1	58.84	C	49.35	C	57.74	CC	64.43	汽车制造业	汽车零部件Ⅲ	底盘与发动机系统
30	2013	富奥股份	C	1	58.64	C	49.35	C	53.04	CCC	67.17	汽车制造业	汽车零部件Ⅲ	底盘与发动机系统
30	2014	富奥股份	CCC	3	67.08	C	52.29	CCC	67.51	B	74.35	汽车制造业	汽车零部件Ⅲ	底盘与发动机系统
30	2015	富奥股份	CCC	3	65.85	C	52.29	CC	60.45	BB	76.42	汽车制造业	汽车零部件Ⅲ	底盘与发动机系统
30	2016	富奥股份	CCC	3	67.76	C	52.29	CCC	67.51	BB	75.83	汽车制造业	汽车零部件Ⅲ	底盘与发动机系统
30	2017	富奥股份	CCC	3	66.73	C	50.52	CC	62.54	BB	77.83	汽车制造业	汽车零部件Ⅲ	底盘与发动机系统
30	2018	富奥股份	CCC	3	65.6	C	53.89	CC	62.54	B	73.65	汽车制造业	汽车零部件Ⅲ	底盘与发动机系统
30	2019	富奥股份	CCC	3	65.58	C	50.52	CC	63.8	B	74.47	汽车制造业	汽车零部件Ⅲ	底盘与发动机系统
30	2020	富奥股份	CCC	3	70	C	53.89	CC	64.26	BBB	82.09	汽车制造业	汽车零部件Ⅲ	底盘与发动机系统
30	2021	富奥股份	CCC	3	69.62	C	59.79	B	73.37	B	73.45	汽车制造业	汽车零部件Ⅲ	底盘与发动机系统
30	2022	富奥股份	B	4	71.33	C	59.79	B	73.23	BB	77.95	汽车制造业	汽车零部件Ⅲ	底盘与发动机系统
30	2023	富奥股份	B	4	70.26	CC	60.21	B	74.26	B	74.03	汽车制造业	汽车零部件Ⅲ	底盘与发动机系统
30	2024	富奥股份	BB	5	79.91	BB	76.35	BB	76.95	BBB	83.15	汽车制造业	底盘与发动机系统	底盘与发动机系统
31	2009	大悦城	BBB	6	80.51	CC	64.05	A	89.19	BB	77.71	房地产业	商业地产	商业地产
31	2010	大悦城	BB	5	79.45	CC	62.03	BBB	82.93	BBB	81.91	房地产业	商业地产	商业地产
31	2011	大悦城	BBB	6	81.25	CCC	69.23	A	85.69	BBB	81.02	房地产业	商业地产	商业地产
31	2012	大悦城	BBB	6	81.26	CC	63.83	AA	90.54	BB	78.22	房地产业	商业地产	商业地产
31	2013	大悦城	BBB	6	81.51	CC	64.05	AA	90.54	BB	78.73	房地产业	商业地产	商业地产
31	2014	大悦城	BBB	6	80.03	C	58.88	A	86.36	BBB	81.02	房地产业	商业地产	商业地产
31	2015	大悦城	BB	5	79.11	CC	60.45	BBB	83.6	BBB	81.02	房地产业	商业地产	商业地产
31	2016	大悦城	BB	5	79.52	CC	62.03	BBB	84.02	BBB	81.02	房地产业	商业地产	商业地产
31	2017	大悦城	BBB	6	81.6	CCC	68.33	A	87.78	BBB	80.13	房地产业	商业地产	商业地产
31	2018	大悦城	BBB	6	81.41	CC	62.48	A	89.37	BBB	80.13	房地产业	商业地产	商业地产
31	2019	大悦城	BBB	6	83.92	CC	60.81	AA	92.62	BBB	83.3	房地产业	商业地产	商业地产
31	2020	大悦城	A	7	85.86	CCC	67.88	AA	93.88	BBB	84.19	房地产业	商业地产	商业地产
31	2021	大悦城	B	4	74.17	CCC	68.08	BB	77.1	BB	76.72	房地产业	商业地产	商业地产
31	2022	大悦城	B	4	74.26	B	70.89	BB	77.16	B	74.72	房地产业	商业地产	商业地产
31	2023	大悦城	BB	5	76.22	B	71.35	BB	76.59	BB	79.76	房地产业	商业地产	商业地产
31	2024	大悦城	BB	5	78.4	BB	79.93	BB	78.57	BB	79.35	房地产业	商业地产	商业地产
32	2009	深桑达A	B	4	74.25	C	55.34	BB	75.58	BBB	81.9	建筑安装业	专业工程	其他专业工程
32	2010	深桑达A	B	4	72.62	C	53.35	BB	75.58	BB	79.88	建筑安装业	专业工程	其他专业工程
32	2011	深桑达A	B	4	74.33	C	53.54	AAA	100	B	74.79	建筑安装业	专业工程	其他专业工程
32	2012	深桑达A	CCC	3	69.32	C	53.54	BB	75.58	B	74.01	建筑安装业	专业工程	其他专业工程
32	2013	深桑达A	BB	5	75.33	C	59.31	BBB	80.46	BBB	80.49	建筑安装业	专业工程	其他专业工程
32	2014	深桑达A	BB	5	75.41	C	59.31	A	85.35	BB	79.03	建筑安装业	专业工程	其他专业工程
32	2015	深桑达A	B	4	74.5	C	59.31	BBB	80.46	BB	79.03	建筑安装业	专业工程	其他专业工程
32	2016	深桑达A	BB	5	77.97	B	70.66	AAA	100	B	73.86	建筑安装业	专业工程	其他专业工程
32	2017	深桑达A	BB	5	78.7	B	71.22	A	85.35	BB	79.72	建筑安装业	专业工程	其他专业工程
32	2018	深桑达A	BB	5	76.66	B	71.22	BB	75.58	BB	79.34	建筑安装业	专业工程	其他专业工程
32	2019	深桑达A	BB	5	76.2	CCC	69.33	BB	75.58	BB	79.34	建筑安装业	专业工程	其他专业工程
32	2020	深桑达A	BB	5	77.51	CCC	69.33	BBB	80.46	BBB	80.03	建筑安装业	专业工程	其他专业工程
32	2021	深桑达A	B	4	74.11	CCC	68.08	BB	77.24	B	74.98	建筑安装业	专业工程	其他专业工程
32	2022	深桑达A	B	4	74.73	CCC	68.08	BB	79.68	B	74.62	建筑安装业	专业工程	其他专业工程
32	2023	深桑达A	B	4	74.29	CCC	68.08	BB	79.4	B	73.82	建筑安装业	专业工程	其他专业工程
32	2024	深桑达A	B	4	72.6	CCC	66.14	BBB	82.33	BB	76.9	建筑安装业	专业工程	其他专业工程
34	2009	神州数码	CCC	3	69.54	C	59.22	BB	75.58	B	71.97	批发业	IT服务	IT服务Ⅲ
34	2010	神州数码	BB	5	75.2	C	59.31	AAA	95.12	BB	75.45	批发业	IT服务	IT服务Ⅲ
34	2011	神州数码	B	4	71.5	C	45.69	AAA	95.12	B	74.77	批发业	IT服务	IT服务Ⅲ
34	2012	神州数码	B	4	70.09	C	51.55	BBB	80.46	B	74.6	批发业	IT服务	IT服务Ⅲ
34	2013	神州数码	BB	5	75.29	CC	62.99	AA	90.23	BB	75.64	批发业	IT服务	IT服务Ⅲ
34	2014	神州数码	BB	5	78.31	B	70.66	A	85.35	BB	79.27	批发业	IT服务	IT服务Ⅲ
34	2015	神州数码	BB	5	77.91	B	70.66	A	85.35	BB	78.57	批发业	IT服务	IT服务Ⅲ
34	2016	神州数码	B	4	72.29	CCC	66.78	BB	75.58	B	73.56	批发业	IT服务	IT服务Ⅲ
34	2017	神州数码	B	4	74.01	C	48.24	AAA	100	BB	76.49	批发业	IT服务	IT服务Ⅲ
34	2018	神州数码	CCC	3	67.38	C	46.26	AAA	95.12	CCC	67.3	批发业	IT服务	IT服务Ⅲ
34	2019	神州数码	CCC	3	68.82	C	46.26	BBB	80.46	B	74.64	批发业	IT服务	IT服务Ⅲ
34	2020	神州数码	B	4	70.13	C	46.26	A	85.35	BB	75.34	批发业	IT服务	IT服务Ⅲ
34	2021	神州数码	B	4	71.47	CCC	67.11	B	71.28	B	73.89	批发业	IT服务	IT服务Ⅲ
34	2022	神州数码	B	4	71.24	CCC	68.08	B	73.36	B	71.34	批发业	IT服务	IT服务Ⅲ
34	2023	神州数码	B	4	73.34	CCC	68.08	B	72.15	BB	76.92	批发业	IT服务	IT服务Ⅲ
34	2024	神州数码	CCC	3	67.93	CCC	65.17	B	73.25	BB	78.33	批发业	IT服务Ⅲ	IT服务Ⅲ
35	2009	中国天楹	CC	2	62.14	C	54.44	C	54.62	B	71.11	生态保护和环境治理业	固废治理	固废治理
35	2010	中国天楹	CC	2	62.14	C	54.44	C	54.62	B	71.11	生态保护和环境治理业	固废治理	固废治理
35	2011	中国天楹	CC	2	62.04	C	53.92	C	54.62	B	71.11	生态保护和环境治理业	固废治理	固废治理
35	2012	中国天楹	CC	2	61.01	C	56.24	C	51.52	B	70.3	生态保护和环境治理业	固废治理	固废治理
35	2013	中国天楹	CC	2	63.72	C	53.92	C	51.52	BB	77.17	生态保护和环境治理业	固废治理	固废治理
35	2014	中国天楹	CCC	3	66.21	C	56.36	C	53.07	BBB	80.4	生态保护和环境治理业	固废治理	固废治理
35	2015	中国天楹	BB	5	75.06	CCC	67.42	CCC	66.12	A	85.1	生态保护和环境治理业	固废治理	固废治理
35	2016	中国天楹	BB	5	79.16	CCC	67.42	BB	75.91	A	86.51	生态保护和环境治理业	固废治理	固废治理
35	2017	中国天楹	BB	5	79.2	CCC	67.95	BB	77.31	A	85.3	生态保护和环境治理业	固废治理	固废治理
35	2018	中国天楹	BB	5	79.2	CCC	67.95	BBB	80.1	BBB	83.14	生态保护和环境治理业	固废治理	固废治理
35	2019	中国天楹	BB	5	78.56	CCC	68.47	BB	75.91	BBB	84.76	生态保护和环境治理业	固废治理	固废治理
35	2020	中国天楹	BB	5	78.99	CCC	68.47	BB	77.15	BBB	84.76	生态保护和环境治理业	固废治理	固废治理
35	2021	中国天楹	BB	5	76.31	B	70.78	BBB	80.82	BB	78.04	生态保护和环境治理业	固废治理	固废治理
35	2022	中国天楹	B	4	72.78	C	57.45	BB	79.73	BBB	80.91	生态保护和环境治理业	固废治理	固废治理
35	2023	中国天楹	B	4	71.56	CC	63.7	BBB	83.42	B	70.77	生态保护和环境治理业	固废治理	固废治理
35	2024	中国天楹	BBB	6	82.55	B	71.5	A	87.14	BBB	82.17	生态保护和环境治理业	固废治理	固废治理
36	2009	华联控股	B	4	74.18	CC	61.42	B	73.88	BB	78.68	房地产业	住宅开发	住宅开发
36	2010	华联控股	BB	5	76.7	CC	63.22	BB	77.05	BBB	80.82	房地产业	住宅开发	住宅开发
36	2011	华联控股	BB	5	76.96	C	58.26	BB	76.8	BBB	83.26	房地产业	住宅开发	住宅开发
36	2012	华联控股	BBB	6	80.37	C	56.47	A	85.16	BBB	83.71	房地产业	住宅开发	住宅开发
36	2013	华联控股	BB	5	75.06	C	58.26	B	74.71	BBB	80.91	房地产业	住宅开发	住宅开发
36	2014	华联控股	BB	5	76.66	CC	60.06	BB	78.89	BBB	80.02	房地产业	住宅开发	住宅开发
36	2015	华联控股	BB	5	78.78	C	56.69	A	85.16	BBB	80.02	房地产业	住宅开发	住宅开发
36	2016	华联控股	BB	5	78.63	C	54.67	A	85.91	BB	79.64	房地产业	住宅开发	住宅开发
36	2017	华联控股	BBB	6	80.07	C	57.37	A	87.5	BBB	80.53	房地产业	住宅开发	住宅开发
36	2018	华联控股	B	4	74.73	C	57.14	BB	77.22	BB	78.16	房地产业	住宅开发	住宅开发
36	2019	华联控股	BBB	6	80.1	C	58.94	BBB	84.15	BBB	83.24	房地产业	住宅开发	住宅开发
36	2020	华联控股	BB	5	77.06	C	57.14	BB	77.47	BBB	83.24	房地产业	住宅开发	住宅开发
36	2021	华联控股	BB	5	75.32	CCC	65.5	BB	78.01	BBB	80.98	房地产业	住宅开发	住宅开发
36	2022	华联控股	BB	5	75.81	CCC	65.5	BB	76.85	BBB	83.1	房地产业	住宅开发	住宅开发
36	2023	华联控股	BB	5	76.64	CCC	68.08	BB	75.14	BBB	84.48	房地产业	住宅开发	住宅开发
36	2024	华联控股	CCC	3	67.28	CCC	66.14	BB	76.19	BB	78.12	房地产业	住宅开发	住宅开发
37	2009	深南电A	CCC	3	67.01	C	59.77	C	59.14	BB	75.13	电力、热力生产和供应业	火电	火力发电
37	2010	深南电A	CCC	3	65.96	C	58.4	C	59.14	B	73.61	电力、热力生产和供应业	火电	火力发电
37	2011	深南电A	CC	2	63.96	C	59.77	C	59.14	CCC	68.83	电力、热力生产和供应业	火电	火力发电
37	2012	深南电A	B	4	70.25	C	58.4	CCC	65.58	BB	78.67	电力、热力生产和供应业	火电	火力发电
37	2013	深南电A	CCC	3	69.28	C	59.77	CCC	66.13	BB	75.7	电力、热力生产和供应业	火电	火力发电
37	2014	深南电A	CCC	3	69.96	C	56.47	CCC	66.13	BB	78.67	电力、热力生产和供应业	火电	火力发电
37	2015	深南电A	CCC	3	69.41	C	56.47	CCC	66.13	BB	77.54	电力、热力生产和供应业	火电	火力发电
37	2016	深南电A	CCC	3	69.81	C	56.47	BB	77.12	B	71.86	电力、热力生产和供应业	火电	火力发电
37	2017	深南电A	CCC	3	69.06	C	55.89	CC	63.25	BB	78.81	电力、热力生产和供应业	火电	火力发电
37	2018	深南电A	CCC	3	67.11	C	57.25	CC	63.25	B	74.11	电力、热力生产和供应业	火电	火力发电
37	2019	深南电A	CCC	3	69.56	C	57.25	CCC	69.02	BB	75.76	电力、热力生产和供应业	火电	火力发电
37	2020	深南电A	CCC	3	69.16	C	57.25	CCC	66.13	BB	76.65	电力、热力生产和供应业	火电	火力发电
37	2021	深南电A	B	4	70.41	CC	63.35	CCC	68.75	BB	78.98	电力、热力生产和供应业	火电	火力发电
37	2022	深南电A	B	4	71.16	CC	64.51	CCC	69.56	BB	79.25	电力、热力生产和供应业	火电	火力发电
37	2023	深南电A	B	4	70.23	CC	63.93	CCC	69.97	BB	77.22	电力、热力生产和供应业	火电	火力发电
37	2024	深南电A	C	1	58.1	CC	63.35	CCC	66.85	BB	79.51	电力、热力生产和供应业	火电	火力发电
38	2021	大通退	B	4	72.54	CC	60.67	B	72.76	B	73.91	商务服务业	综合Ⅲ	综合Ⅲ
38	2022	大通退	CCC	3	65.94	CC	60.67	B	72.53	CC	61.2	商务服务业	综合Ⅲ	综合Ⅲ
39	2009	中集集团	BB	5	77.02	B	70.67	CCC	69.97	A	85.02	金属制品业	金属制品	金属制品
39	2010	中集集团	BB	5	76.56	CCC	67.3	B	72.24	BBB	84.2	金属制品业	金属制品	金属制品
39	2011	中集集团	BB	5	79	CCC	69.09	BBB	80	BBB	83.38	金属制品业	金属制品	金属制品
39	2012	中集集团	BB	5	77.23	CC	64.48	B	73.68	A	86.14	金属制品业	金属制品	金属制品
39	2013	中集集团	BB	5	78.41	CCC	67.85	B	74.95	A	86.14	金属制品业	金属制品	金属制品
39	2014	中集集团	CCC	3	69.92	C	59.25	CC	64.26	BB	79.18	金属制品业	金属制品	金属制品
39	2015	中集集团	BB	5	79.54	B	70.67	BBB	80.65	BBB	83.32	金属制品业	金属制品	金属制品
39	2016	中集集团	BB	5	77.36	B	70.67	B	73.6	BBB	83.32	金属制品业	金属制品	金属制品
39	2017	中集集团	B	4	73.46	CCC	65.98	CCC	66.54	BBB	81.94	金属制品业	金属制品	金属制品
39	2018	中集集团	BB	5	78.87	B	70.27	BB	78.78	BBB	83.32	金属制品业	金属制品	金属制品
39	2019	中集集团	BBB	6	81.28	B	70.27	A	85.36	BBB	84.14	金属制品业	金属制品	金属制品
39	2020	中集集团	BBB	6	80.06	B	72.06	BBB	83.01	BBB	82.15	金属制品业	金属制品	金属制品
39	2021	中集集团	BB	5	77.15	BB	77.72	B	71.09	BBB	80.52	金属制品业	金属制品	金属制品
39	2022	中集集团	BBB	6	84.35	BBB	80.16	AA	93.03	BBB	82.17	金属制品业	金属制品	金属制品
39	2023	中集集团	A	7	85.42	BBB	80.49	AA	91.43	A	85.47	金属制品业	金属制品	金属制品
39	2024	中集集团	AAA	9	95.18	BBB	84.13	AA	92.53	A	86.51	金属制品业	金属制品	金属制品
40	2009	东旭蓝天	CCC	3	69.31	C	55.76	BB	76.57	B	71.48	电力、热力生产和供应业	新能源发电	光伏发电
40	2010	东旭蓝天	B	4	71.92	C	55.76	B	71.35	BB	79.97	电力、热力生产和供应业	新能源发电	光伏发电
40	2011	东旭蓝天	CCC	3	67.83	C	55.76	CC	63.86	BB	75.94	电力、热力生产和供应业	新能源发电	光伏发电
40	2012	东旭蓝天	CCC	3	65.67	C	50.54	C	53.37	BBB	80.19	电力、热力生产和供应业	新能源发电	光伏发电
40	2013	东旭蓝天	CC	2	62	C	50.54	BB	78.29	C	57.83	电力、热力生产和供应业	新能源发电	光伏发电
40	2014	东旭蓝天	CCC	3	67.34	C	51.9	BB	77.12	CCC	68.91	电力、热力生产和供应业	新能源发电	光伏发电
40	2015	东旭蓝天	CCC	3	67.11	C	50.54	CC	62.02	BB	78.05	电力、热力生产和供应业	新能源发电	光伏发电
40	2016	东旭蓝天	CCC	3	69.84	C	51.9	CCC	67.79	BB	79.62	电力、热力生产和供应业	新能源发电	光伏发电
40	2017	东旭蓝天	B	4	72.54	C	54.04	B	74.23	BBB	80.38	电力、热力生产和供应业	新能源发电	光伏发电
40	2018	东旭蓝天	BB	5	76.49	CC	63.13	BBB	84.11	BB	78.36	电力、热力生产和供应业	新能源发电	光伏发电
40	2019	东旭蓝天	B	4	71.02	CC	63.13	CCC	69.69	BB	75.58	电力、热力生产和供应业	新能源发电	光伏发电
40	2020	东旭蓝天	CCC	3	68.34	CCC	66.04	CCC	69.69	CCC	68.63	电力、热力生产和供应业	新能源发电	光伏发电
40	2021	东旭蓝天	CCC	3	68.58	B	72.09	B	73.01	CC	62.42	电力、热力生产和供应业	新能源发电	光伏发电
40	2022	东旭蓝天	B	4	73.53	BB	77.61	B	73.5	CCC	69.12	电力、热力生产和供应业	新能源发电	光伏发电
40	2023	东旭蓝天	B	4	74.83	BB	76.27	BB	79.77	B	70.63	电力、热力生产和供应业	新能源发电	光伏发电
40	2024	*ST旭蓝	C	1	59.72	CCC	69.03	BBB	80.14	CCC	69.28	电力、热力生产和供应业	新能源发电	光伏发电
42	2009	中洲控股	BB	5	76.36	C	59.84	BB	76.22	BBB	81.93	房地产业	住宅开发	住宅开发
42	2010	中洲控股	B	4	73.98	C	55.11	B	74.97	BB	79.26	房地产业	住宅开发	住宅开发
42	2011	中洲控股	BB	5	77.25	C	54.89	BBB	82.9	BB	79.26	房地产业	住宅开发	住宅开发
42	2012	中洲控股	B	4	73.86	C	53.09	BB	75.38	BB	79.26	房地产业	住宅开发	住宅开发
42	2013	中洲控股	B	4	74.25	C	53.09	BB	79.14	BB	76.59	房地产业	住宅开发	住宅开发
42	2014	中洲控股	B	4	73.71	C	53.09	BB	79.73	B	74.81	房地产业	住宅开发	住宅开发
42	2015	中洲控股	BB	5	75.98	C	54.67	BBB	81.81	BB	77.48	房地产业	住宅开发	住宅开发
42	2016	中洲控股	CCC	3	69.37	C	54.67	BBB	83.9	CC	60.46	房地产业	住宅开发	住宅开发
42	2017	中洲控股	B	4	74.87	CC	62.32	A	86.41	CCC	68.08	房地产业	住宅开发	住宅开发
42	2018	中洲控股	B	4	70.31	CC	60.52	BBB	83.9	CC	60.67	房地产业	住宅开发	住宅开发
42	2019	中洲控股	CCC	3	68.53	C	57.14	BBB	83.4	C	58.22	房地产业	住宅开发	住宅开发
42	2020	中洲控股	B	4	70.35	C	57.14	BBB	81.73	CC	63.93	房地产业	住宅开发	住宅开发
42	2021	中洲控股	B	4	70.59	CCC	68.08	BB	75.38	CCC	68.96	房地产业	住宅开发	住宅开发
42	2022	中洲控股	B	4	71.58	CCC	68.08	BB	75.03	B	71.74	房地产业	住宅开发	住宅开发
42	2023	中洲控股	B	4	70.18	CCC	68.08	BB	75.38	CCC	67.91	房地产业	住宅开发	住宅开发
42	2024	中洲控股	C	1	56.47	CCC	65.5	BB	75.76	CCC	65.59	房地产业	住宅开发	住宅开发
45	2009	深纺织A	B	4	71.49	C	45.76	CCC	67.84	A	87.09	计算机、通信和其他电子设备制造业	面板	面板
45	2010	深纺织A	B	4	72.61	C	45.76	B	72.67	A	86.27	计算机、通信和其他电子设备制造业	面板	面板
45	2011	深纺织A	B	4	70.85	C	45.76	CCC	67.51	A	85.91	计算机、通信和其他电子设备制造业	面板	面板
45	2012	深纺织A	C	1	57.87	C	45.76	C	26.66	A	85.09	计算机、通信和其他电子设备制造业	面板	面板
45	2013	深纺织A	CCC	3	65.42	CC	61.52	C	48.64	BB	78.73	计算机、通信和其他电子设备制造业	面板	面板
45	2014	深纺织A	B	4	70.13	C	55.88	C	57.51	A	85.91	计算机、通信和其他电子设备制造业	面板	面板
45	2015	深纺织A	B	4	71.77	CC	61.52	CC	61.81	BBB	83.72	计算机、通信和其他电子设备制造业	面板	面板
45	2016	深纺织A	B	4	71.49	C	59.94	C	57.11	A	87.09	计算机、通信和其他电子设备制造业	面板	面板
45	2017	深纺织A	B	4	72.07	CC	61.33	CC	62.94	BBB	83.72	计算机、通信和其他电子设备制造业	面板	面板
45	2018	深纺织A	B	4	73.66	CC	61.88	CCC	67.64	BBB	83.73	计算机、通信和其他电子设备制造业	面板	面板
45	2019	深纺织A	B	4	70.05	CC	62.91	CCC	65.29	BB	76.9	计算机、通信和其他电子设备制造业	面板	面板
45	2020	深纺织A	B	4	70.6	CC	61.33	CCC	65.29	BB	78.92	计算机、通信和其他电子设备制造业	面板	面板
45	2021	深纺织A	B	4	71.64	CC	64.19	CCC	65.8	BB	79.73	计算机、通信和其他电子设备制造业	面板	面板
45	2022	深纺织A	B	4	71.12	CC	64.19	CCC	66.1	BB	78.36	计算机、通信和其他电子设备制造业	面板	面板
45	2023	深纺织A	B	4	73.25	CC	64.19	B	70.48	BB	79.97	计算机、通信和其他电子设备制造业	面板	面板
45	2024	深纺织A	CCC	3	67.67	CC	64.19	CCC	68.93	BBB	81.48	计算机、通信和其他电子设备制造业	面板	面板
46	2009	*ST泛海	BBB	6	81.74	CC	64.28	AA	90.86	BB	78.86	其他金融业	住宅开发	住宅开发
46	2010	*ST泛海	BBB	6	80.3	CC	62.48	A	88.03	BB	78.86	其他金融业	住宅开发	住宅开发
46	2011	*ST泛海	BB	5	77.87	CC	62.25	BBB	81.51	BB	79.57	其他金融业	住宅开发	住宅开发
46	2012	*ST泛海	BB	5	79.09	C	58.88	A	88.96	BB	76.42	其他金融业	住宅开发	住宅开发
46	2013	*ST泛海	BBB	6	82.7	CCC	67.43	A	89.28	BBB	81.5	其他金融业	住宅开发	住宅开发
46	2014	*ST泛海	BBB	6	82.84	CCC	69.01	AA	90.54	BBB	80.11	其他金融业	住宅开发	住宅开发
46	2015	*ST泛海	BBB	6	82.27	CC	63.83	A	89.12	BBB	81.86	其他金融业	住宅开发	住宅开发
46	2016	*ST泛海	BB	5	78.05	CC	60.45	A	89.12	B	73.37	其他金融业	住宅开发	住宅开发
46	2017	*ST泛海	BB	5	78.69	CCC	66.75	A	85.36	BB	76.3	其他金融业	住宅开发	住宅开发
46	2018	*ST泛海	BB	5	79.71	CC	63.15	A	88.96	BB	76.42	其他金融业	住宅开发	住宅开发
46	2019	*ST泛海	BB	5	77.93	CC	63.15	A	85.78	BB	75.37	其他金融业	住宅开发	住宅开发
46	2020	*ST泛海	CCC	3	68.36	CCC	68.39	BBB	81.81	C	58.98	其他金融业	住宅开发	住宅开发
46	2021	*ST泛海	CCC	3	65.69	CC	60.62	BB	75.11	C	59.59	其他金融业	住宅开发	住宅开发
46	2022	*ST泛海	CCC	3	65.3	CC	60.62	B	74.66	C	59.16	其他金融业	住宅开发	住宅开发
46	2023	*ST泛海	CC	2	64.19	CC	60.62	B	73.58	C	57.76	其他金融业	住宅开发	住宅开发
48	2009	京基智农	CCC	3	69.1	CC	60.98	CC	64.63	BB	76.26	农副食品加工业	畜禽养殖	住宅开发
48	2010	京基智农	B	4	71.13	C	57.61	CCC	65.26	BBB	82	农副食品加工业	畜禽养殖	住宅开发
48	2011	京基智农	CCC	3	69.74	C	57.61	CCC	65.49	BB	78.8	农副食品加工业	畜禽养殖	住宅开发
48	2012	京基智农	CCC	3	68.51	C	56.03	CC	60.91	BBB	80	农副食品加工业	畜禽养殖	住宅开发
48	2013	京基智农	CC	2	61.75	C	57.82	CCC	69.96	C	58.22	农副食品加工业	畜禽养殖	住宅开发
48	2014	京基智农	CC	2	63.48	C	59.4	CCC	68.83	CC	61.96	农副食品加工业	畜禽养殖	住宅开发
48	2015	京基智农	CC	2	64.31	C	54.24	CCC	68.83	CCC	66.41	农副食品加工业	畜禽养殖	住宅开发
48	2016	京基智农	CCC	3	66.48	C	58.64	CCC	69.82	CCC	68.24	农副食品加工业	畜禽养殖	住宅开发
48	2017	京基智农	CCC	3	65.16	C	56.51	B	70.45	CCC	66.01	农副食品加工业	畜禽养殖	住宅开发
48	2018	京基智农	C	1	58.54	C	51.22	CCC	65.24	C	57.77	农副食品加工业	畜禽养殖	住宅开发
48	2019	京基智农	C	1	52.78	C	48.68	CCC	66.47	C	45.65	农副食品加工业	畜禽养殖	住宅开发
48	2020	京基智农	C	1	55.5	C	52.05	CC	63	C	52.21	农副食品加工业	畜禽养殖	住宅开发
48	2021	京基智农	CCC	3	68.06	CC	60.85	BBB	81.39	CCC	65.43	农副食品加工业	畜禽养殖	住宅开发
48	2022	京基智农	CCC	3	68.51	CC	60.7	BB	77.06	CCC	69.78	农副食品加工业	畜禽养殖	住宅开发
48	2023	京基智农	BB	5	77.49	B	74.73	BBB	82.04	BB	76.22	农副食品加工业	畜禽养殖	住宅开发
48	2024	京基智农	BB	5	78.82	B	71.67	BBB	84.48	BB	79.15	农副食品加工业	生猪养殖	住宅开发
49	2009	德赛电池	CCC	3	67.96	CC	60.51	C	53.04	BBB	81.82	电气机械和器材制造业	电池	锂电池
49	2010	德赛电池	CCC	3	69.96	CC	64.37	CC	62.58	BB	77.8	电气机械和器材制造业	电池	锂电池
49	2011	德赛电池	CCC	3	68.75	C	53.98	CC	64.8	BB	78.95	电气机械和器材制造业	电池	锂电池
49	2012	德赛电池	B	4	70.41	C	57.14	CC	64.8	BBB	80.97	电气机械和器材制造业	电池	锂电池
49	2013	德赛电池	CCC	3	69.68	C	58.93	CC	60.42	BBB	81.41	电气机械和器材制造业	电池	锂电池
49	2014	德赛电池	B	4	72.7	C	57.14	B	72.17	BBB	81	电气机械和器材制造业	电池	锂电池
49	2015	德赛电池	B	4	71.68	C	57.14	B	71.31	BB	79.36	电气机械和器材制造业	电池	锂电池
49	2016	德赛电池	CCC	3	68.22	C	55.35	CC	61.45	BB	79.36	电气机械和器材制造业	电池	锂电池
49	2017	德赛电池	B	4	70.64	C	57.98	CCC	67.28	BB	79.36	电气机械和器材制造业	电池	锂电池
49	2018	德赛电池	B	4	71.07	C	55.16	B	70.82	BB	79.36	电气机械和器材制造业	电池	锂电池
49	2019	德赛电池	CCC	3	67.83	C	56.95	C	57.74	BBB	80.18	电气机械和器材制造业	电池	锂电池
49	2020	德赛电池	CCC	3	67.47	C	56.95	C	55.39	BBB	81	电气机械和器材制造业	电池	锂电池
49	2021	德赛电池	B	4	72.45	CC	64.19	B	70.8	BB	77.94	电气机械和器材制造业	电池	锂电池
49	2022	德赛电池	B	4	70.35	CC	64.19	CCC	69.88	B	73.9	电气机械和器材制造业	电池	锂电池
49	2023	德赛电池	B	4	72.55	CC	64.19	B	71.1	BB	77.94	电气机械和器材制造业	电池	锂电池
49	2024	德赛电池	CCC	3	68.45	CCC	68.5	B	70.51	BB	79.05	电气机械和器材制造业	锂电池	锂电池
50	2009	深天马A	B	4	72.38	C	57.45	CC	62.45	A	86.69	计算机、通信和其他电子设备制造业	面板	面板
50	2010	深天马A	B	4	70.29	C	55.88	CC	64	BBB	81.9	计算机、通信和其他电子设备制造业	面板	面板
50	2011	深天马A	B	4	71.89	C	45.76	B	73.31	BBB	84.28	计算机、通信和其他电子设备制造业	面板	面板
50	2012	深天马A	B	4	71.93	CC	61.52	CCC	65.15	BBB	81.82	计算机、通信和其他电子设备制造业	面板	面板
50	2013	深天马A	B	4	70.03	CC	60.77	C	58.11	BBB	82.79	计算机、通信和其他电子设备制造业	面板	面板
50	2014	深天马A	B	4	71.6	CC	64.14	CCC	65.95	BB	79.21	计算机、通信和其他电子设备制造业	面板	面板
50	2015	深天马A	BB	5	75.33	CC	62.14	B	70.65	A	85.22	计算机、通信和其他电子设备制造业	面板	面板
50	2016	深天马A	B	4	73.05	CC	62.35	CC	62.82	A	85.42	计算机、通信和其他电子设备制造业	面板	面板
50	2017	深天马A	BB	5	75.69	CCC	66.9	B	70.33	BBB	83.79	计算机、通信和其他电子设备制造业	面板	面板
50	2018	深天马A	BB	5	76.72	CC	63.53	BB	75.03	BBB	84.59	计算机、通信和其他电子设备制造业	面板	面板
50	2019	深天马A	B	4	73.72	CC	61.95	BB	75.03	BB	78.85	计算机、通信和其他电子设备制造业	面板	面板
50	2020	深天马A	B	4	72.85	CC	63.53	CCC	67.98	BBB	80.9	计算机、通信和其他电子设备制造业	面板	面板
50	2021	深天马A	BB	5	77.34	B	73.92	BB	76.44	BB	79.78	计算机、通信和其他电子设备制造业	面板	面板
50	2022	深天马A	BB	5	77.25	B	73.92	BB	76.42	BB	79.58	计算机、通信和其他电子设备制造业	面板	面板
50	2023	深天马A	BB	5	75.75	B	72.83	BB	77.29	BB	76.16	计算机、通信和其他电子设备制造业	面板	面板
50	2024	深天马A	BBB	6	82.71	BB	79.31	BBB	83.72	BBB	80.44	计算机、通信和其他电子设备制造业	面板	面板
55	2009	方大集团	B	4	74.23	CC	61.07	CCC	66.35	A	86.27	金属制品业	其他建材	其他建材
55	2010	方大集团	B	4	74.6	CC	61.07	CCC	69.96	BBB	84.63	金属制品业	其他建材	其他建材
55	2011	方大集团	BB	5	75.14	C	59.49	B	72.9	BBB	84.63	金属制品业	其他建材	其他建材
55	2012	方大集团	BB	5	76.27	CC	62.32	BB	76.87	BBB	82.99	金属制品业	其他建材	其他建材
55	2013	方大集团	B	4	71.12	C	59.49	CCC	66.47	BBB	80.18	金属制品业	其他建材	其他建材
55	2014	方大集团	B	4	70.05	C	59.49	CC	61.28	BBB	81.36	金属制品业	其他建材	其他建材
55	2015	方大集团	B	4	73.57	C	59.49	B	73.9	BBB	80.54	金属制品业	其他建材	其他建材
55	2016	方大集团	CCC	3	69.04	C	57.91	CC	60.42	BBB	80.54	金属制品业	其他建材	其他建材
55	2017	方大集团	BB	5	76.79	CC	63.37	BB	78.96	BBB	82.17	金属制品业	其他建材	其他建材
55	2018	方大集团	B	4	71.4	C	48.98	B	72.41	BBB	82.17	金属制品业	其他建材	其他建材
55	2019	方大集团	BB	5	75.93	CC	60.4	BB	77.2	BBB	83.01	金属制品业	其他建材	其他建材
55	2020	方大集团	BB	5	77.96	CC	60.4	BBB	83.75	BBB	83.01	金属制品业	其他建材	其他建材
55	2021	方大集团	B	4	73.88	CC	62.22	BB	77.38	BBB	81.04	金属制品业	其他建材	其他建材
55	2022	方大集团	B	4	74.47	CC	61.04	BB	78.87	BBB	82.51	金属制品业	其他建材	其他建材
55	2023	方大集团	B	4	74.97	CC	61.04	BB	78.21	BBB	84	金属制品业	其他建材	其他建材
55	2024	方大集团	B	4	70	C	59.13	BB	77.46	BBB	82.47	金属制品业	其他建材	其他建材
56	2009	皇庭国际	B	4	71.87	C	51.51	B	72.63	BB	77.85	商务服务业	商业物业经营	物业管理
56	2010	皇庭国际	CCC	3	67.63	C	51.51	B	74.71	CCC	66.23	商务服务业	商业物业经营	物业管理
56	2011	皇庭国际	CC	2	60.7	C	54.67	BB	76.8	C	47.45	商务服务业	商业物业经营	物业管理
56	2012	皇庭国际	CCC	3	66.15	C	53.09	BBB	80.98	C	56.42	商务服务业	商业物业经营	物业管理
56	2013	皇庭国际	B	4	70.15	C	56.69	BB	78.89	CCC	66.31	商务服务业	商业物业经营	物业管理
56	2014	皇庭国际	B	4	70.38	C	55.11	BB	78.89	CCC	67.35	商务服务业	商业物业经营	物业管理
56	2015	皇庭国际	B	4	71.07	C	51.51	BBB	80.98	CCC	68.13	商务服务业	商业物业经营	物业管理
56	2016	皇庭国际	B	4	70.78	C	51.51	B	70.54	BB	77.35	商务服务业	商业物业经营	物业管理
56	2017	皇庭国际	B	4	71.98	C	52.41	BB	78.89	B	71.89	商务服务业	商业物业经营	物业管理
56	2018	皇庭国际	B	4	71.26	C	55.57	BBB	80.98	CCC	67.23	商务服务业	商业物业经营	物业管理
56	2019	皇庭国际	CCC	3	67.3	C	52.89	B	72.5	B	73.03	商务服务业	商业物业经营	物业管理
56	2020	皇庭国际	CC	2	61.95	C	51.55	CCC	68.78	CC	64.08	商务服务业	商业物业经营	物业管理
56	2021	皇庭国际	B	4	71.73	CCC	65.5	B	74.22	B	74.74	商务服务业	商业物业经营	物业管理
56	2022	皇庭国际	CC	2	63.59	CCC	65.5	B	71.29	C	56.28	商务服务业	商业物业经营	物业管理
56	2023	皇庭国际	CC	2	63.84	CCC	65.5	B	73.01	C	55.63	商务服务业	商业物业经营	物业管理
56	2024	皇庭国际	C	1	50	CCC	66.14	BB	77.17	C	56.11	商务服务业	商业物业经营	物业管理
58	2009	深赛格	CCC	3	69.94	C	51.07	CCC	67.19	BBB	83.68	商务服务业	商业物业经营	商业物业经营
58	2010	深赛格	CCC	3	69.68	C	55.11	CC	64.64	BBB	82.18	商务服务业	商业物业经营	商业物业经营
58	2011	深赛格	B	4	73.74	C	48.17	BBB	83.32	BBB	83.68	商务服务业	商业物业经营	商业物业经营
58	2012	深赛格	B	4	70.95	C	48.17	BB	77.39	BBB	81.17	商务服务业	商业物业经营	商业物业经营
58	2013	深赛格	CCC	3	68.11	C	49.62	CCC	66.02	BBB	81.17	商务服务业	商业物业经营	商业物业经营
58	2014	深赛格	B	4	73.27	C	51.07	BBB	80.15	BBB	82.84	商务服务业	商业物业经营	商业物业经营
58	2015	深赛格	B	4	71.77	C	49.62	BBB	80.15	BBB	80.33	商务服务业	商业物业经营	商业物业经营
58	2016	深赛格	B	4	72.15	C	52.52	BB	77.39	BBB	81.17	商务服务业	商业物业经营	商业物业经营
58	2017	深赛格	CCC	3	67.92	C	53	CC	64.64	BB	79.49	商务服务业	商业物业经营	商业物业经营
58	2018	深赛格	B	4	73.69	C	55.79	BBB	84.3	BB	78.09	商务服务业	商业物业经营	商业物业经营
58	2019	深赛格	B	4	71.68	C	56.08	BB	75.7	BB	78.93	商务服务业	商业物业经营	商业物业经营
58	2020	深赛格	B	4	73.66	C	55.69	BBB	84.3	BB	78.09	商务服务业	商业物业经营	商业物业经营
58	2021	深赛格	B	4	73.11	CCC	67.55	BB	75.64	BB	75.55	商务服务业	商业物业经营	商业物业经营
58	2022	深赛格	B	4	72.78	CCC	67.55	BB	77.37	B	73.43	商务服务业	商业物业经营	商业物业经营
58	2023	深赛格	B	4	72.71	CCC	67.55	BB	76.51	B	73.9	商务服务业	商业物业经营	商业物业经营
58	2024	深赛格	CCC	3	65.08	CCC	66.31	B	74.78	BB	76.28	商务服务业	商业物业经营	商业物业经营
59	2009	华锦股份	BB	5	75.96	CC	60.98	B	72.54	A	85.91	石油加工、炼焦和核燃料加工业	石油加工	炼油化工
59	2010	华锦股份	BB	5	77.35	CC	63.39	B	74.39	A	86.48	石油加工、炼焦和核燃料加工业	石油加工	炼油化工
59	2011	华锦股份	BB	5	78.78	B	70.45	BBB	80.54	BBB	81.84	石油加工、炼焦和核燃料加工业	石油加工	炼油化工
59	2012	华锦股份	BBB	6	80.03	B	73.82	BBB	83.25	BBB	81.03	石油加工、炼焦和核燃料加工业	石油加工	炼油化工
59	2013	华锦股份	BB	5	77.9	B	73.82	B	73.14	BBB	83.2	石油加工、炼焦和核燃料加工业	石油加工	炼油化工
59	2014	华锦股份	B	4	74.78	CCC	68.04	B	74.18	BB	78.62	石油加工、炼焦和核燃料加工业	石油加工	炼油化工
59	2015	华锦股份	B	4	73.26	CC	64.67	B	71.83	BB	78.62	石油加工、炼焦和核燃料加工业	石油加工	炼油化工
59	2016	华锦股份	B	4	72.72	C	50.38	B	73.72	BBB	83.46	石油加工、炼焦和核燃料加工业	石油加工	炼油化工
59	2017	华锦股份	BB	5	76.37	C	58.7	BBB	81.67	BBB	81.82	石油加工、炼焦和核燃料加工业	石油加工	炼油化工
59	2018	华锦股份	BB	5	76.21	CC	62.27	BBB	81.67	BB	79.63	石油加工、炼焦和核燃料加工业	石油加工	炼油化工
59	2019	华锦股份	BB	5	77.06	CCC	67.42	BB	79.32	BBB	80.45	石油加工、炼焦和核燃料加工业	石油加工	炼油化工
59	2020	华锦股份	BB	5	78.36	CCC	66.77	BBB	82.82	BBB	81.27	石油加工、炼焦和核燃料加工业	石油加工	炼油化工
59	2021	华锦股份	B	4	71.52	CC	62.43	BB	78.59	BB	75.79	石油加工、炼焦和核燃料加工业	石油加工	炼油化工
59	2022	华锦股份	B	4	72.5	CCC	65.31	BB	78.94	BB	75.37	石油加工、炼焦和核燃料加工业	石油加工	炼油化工
59	2023	华锦股份	BB	5	76.64	B	70.35	A	85.81	BB	76.96	石油加工、炼焦和核燃料加工业	石油加工	炼油化工
59	2024	华锦股份	A	7	87.39	BB	76.54	A	85.84	A	87.43	石油加工、炼焦和核燃料加工业	石油加工	炼油化工
60	2009	中金岭南	BB	5	76.24	CC	63.53	B	74.05	BBB	84.2	有色金属冶炼和压延加工业	铅锌	铅锌
60	2010	中金岭南	BB	5	79.29	B	70.97	BB	79.52	BBB	83.38	有色金属冶炼和压延加工业	铅锌	铅锌
60	2011	中金岭南	BB	5	79.58	B	70.75	BB	76.54	A	86.14	有色金属冶炼和压延加工业	铅锌	铅锌
60	2012	中金岭南	BB	5	79.03	B	70.75	B	74.74	A	86.14	有色金属冶炼和压延加工业	铅锌	铅锌
60	2013	中金岭南	BB	5	79.13	B	72.55	BB	76.6	BBB	84.2	有色金属冶炼和压延加工业	铅锌	铅锌
60	2014	中金岭南	B	4	72.55	C	59.33	CCC	67.33	BBB	82.82	有色金属冶炼和压延加工业	铅锌	铅锌
60	2015	中金岭南	BB	5	77.76	CCC	67.93	B	74.19	A	85.19	有色金属冶炼和压延加工业	铅锌	铅锌
60	2016	中金岭南	BB	5	78.03	CC	64.35	BB	76.54	A	86.01	有色金属冶炼和压延加工业	铅锌	铅锌
60	2017	中金岭南	BB	5	78.78	CCC	65.5	BB	75.42	A	87.83	有色金属冶炼和压延加工业	铅锌	铅锌
60	2018	中金岭南	BB	5	76.32	CC	61.28	BB	76.28	BBB	84.02	有色金属冶炼和压延加工业	铅锌	铅锌
60	2019	中金岭南	BB	5	77.76	CC	64.46	BB	78.55	BBB	84.02	有色金属冶炼和压延加工业	铅锌	铅锌
60	2020	中金岭南	BB	5	78.64	CCC	67.59	BB	77.82	BBB	84.84	有色金属冶炼和压延加工业	铅锌	铅锌
60	2021	中金岭南	B	4	72.33	CC	60.92	BB	77.87	BBB	82.56	有色金属冶炼和压延加工业	铅锌	铅锌
60	2022	中金岭南	B	4	73.74	CCC	65.97	BB	78.22	BBB	80.18	有色金属冶炼和压延加工业	铅锌	铅锌
60	2023	中金岭南	BB	5	75.84	B	72.28	BB	78.92	BB	78	有色金属冶炼和压延加工业	铅锌	铅锌
60	2024	中金岭南	B	4	74.94	CCC	65.3	BBB	84.22	BBB	82.74	有色金属冶炼和压延加工业	铅锌	铅锌
61	2009	农产品	B	4	74.73	CC	61.34	B	73.54	BBB	83.97	商务服务业	商业物业经营	商业物业经营
61	2010	农产品	BB	5	75.35	C	55.86	BBB	82.36	BBB	83.13	商务服务业	商业物业经营	商业物业经营
61	2011	农产品	B	4	74.6	C	58.76	BBB	83.74	BB	78.67	商务服务业	商业物业经营	商业物业经营
61	2012	农产品	BB	5	78.04	CC	64.14	BBB	83.74	BBB	83.13	商务服务业	商业物业经营	商业物业经营
61	2013	农产品	B	4	74.58	CC	62.69	B	72.37	BBB	83.55	商务服务业	商业物业经营	商业物业经营
61	2014	农产品	B	4	73.82	CC	61.34	B	70.99	BBB	83.55	商务服务业	商业物业经营	商业物业经营
61	2015	农产品	BB	5	77.23	CC	61.34	BBB	82.97	BBB	83.55	商务服务业	商业物业经营	商业物业经营
61	2016	农产品	BB	5	78.23	CC	64.14	BBB	83.74	BBB	83.55	商务服务业	商业物业经营	商业物业经营
61	2017	农产品	BB	5	78.15	CC	64.62	BBB	83	BBB	83.55	商务服务业	商业物业经营	商业物业经营
61	2018	农产品	BB	5	78.15	CC	64.62	BBB	83	BBB	83.55	商务服务业	商业物业经营	商业物业经营
61	2019	农产品	BB	5	77.75	CC	64.62	BBB	81.62	BBB	83.55	商务服务业	商业物业经营	商业物业经营
61	2020	农产品	BB	5	77.88	CC	62.31	BBB	82.34	BBB	84.82	商务服务业	商业物业经营	商业物业经营
61	2021	农产品	B	4	73.93	CCC	66.38	B	73.11	BB	78.25	商务服务业	商业物业经营	商业物业经营
61	2022	农产品	B	4	73.33	CCC	66.03	B	71.73	BB	78.09	商务服务业	商业物业经营	商业物业经营
61	2023	农产品	B	4	74.97	CCC	69.91	B	71.14	BBB	80.27	商务服务业	商业物业经营	商业物业经营
61	2024	农产品	B	4	73.76	CCC	67.44	BBB	80.86	BBB	83.32	商务服务业	商业物业经营	商业物业经营
62	2009	深圳华强	B	4	71.67	C	53.26	BB	75.58	BB	78.26	批发业	其他电子Ⅲ	其他电子Ⅲ
62	2010	深圳华强	BB	5	77.45	C	51.37	AAA	100	BBB	81.19	批发业	其他电子Ⅲ	其他电子Ⅲ
62	2011	深圳华强	B	4	70.77	C	49.57	BB	75.58	BB	78.26	批发业	其他电子Ⅲ	其他电子Ⅲ
62	2012	深圳华强	B	4	73.76	C	49.57	AAA	100	BB	75.48	批发业	其他电子Ⅲ	其他电子Ⅲ
62	2013	深圳华强	BB	5	76.85	C	55.43	AAA	100	BB	78.41	批发业	其他电子Ⅲ	其他电子Ⅲ
62	2014	深圳华强	B	4	71.81	C	49.57	A	85.35	BB	76.87	批发业	其他电子Ⅲ	其他电子Ⅲ
62	2015	深圳华强	B	4	72.66	C	51.46	A	85.35	BB	77.56	批发业	其他电子Ⅲ	其他电子Ⅲ
62	2016	深圳华强	B	4	73.48	C	49.57	A	85.35	BB	79.8	批发业	其他电子Ⅲ	其他电子Ⅲ
62	2017	深圳华强	B	4	72.28	C	46.26	A	85.35	BB	79.11	批发业	其他电子Ⅲ	其他电子Ⅲ
62	2018	深圳华强	BB	5	76.53	C	54.11	AAA	100	BB	78.41	批发业	其他电子Ⅲ	其他电子Ⅲ
62	2019	深圳华强	B	4	74.24	C	52.21	AA	90.23	BB	78.41	批发业	其他电子Ⅲ	其他电子Ⅲ
62	2020	深圳华强	B	4	74.19	C	54.11	A	85.35	BB	79.11	批发业	其他电子Ⅲ	其他电子Ⅲ
62	2021	深圳华强	B	4	74.05	CC	64.19	B	70.41	BBB	81.8	批发业	其他电子Ⅲ	其他电子Ⅲ
62	2022	深圳华强	B	4	73.46	CC	64.19	B	71.66	BB	79.59	批发业	其他电子Ⅲ	其他电子Ⅲ
62	2023	深圳华强	B	4	73.63	CC	64.19	CCC	69.25	BBB	81.7	批发业	其他电子Ⅲ	其他电子Ⅲ
62	2024	深圳华强	CCC	3	66.54	CC	64.19	CCC	68.4	BBB	80.57	批发业	其他电子Ⅲ	其他电子Ⅲ
63	2009	中兴通讯	BB	5	78.23	B	70.67	B	71.01	A	86.96	计算机、通信和其他电子设备制造业	通信网络设备及器件	通信网络设备及器件
63	2010	中兴通讯	BB	5	77.27	CCC	69.09	CCC	69.09	A	86.96	计算机、通信和其他电子设备制造业	通信网络设备及器件	通信网络设备及器件
63	2011	中兴通讯	BB	5	76.13	CCC	68.71	CCC	69.87	BBB	84.14	计算机、通信和其他电子设备制造业	通信网络设备及器件	通信网络设备及器件
63	2012	中兴通讯	BB	5	78.1	B	70.5	B	73.68	BBB	84.96	计算机、通信和其他电子设备制造业	通信网络设备及器件	通信网络设备及器件
63	2013	中兴通讯	B	4	73.34	CCC	67.13	CC	62.57	BBB	83.76	计算机、通信和其他电子设备制造业	通信网络设备及器件	通信网络设备及器件
63	2014	中兴通讯	B	4	74.3	B	70.5	CC	62.57	BBB	84.14	计算机、通信和其他电子设备制造业	通信网络设备及器件	通信网络设备及器件
63	2015	中兴通讯	BB	5	76.66	B	70.5	B	71.98	BBB	82.97	计算机、通信和其他电子设备制造业	通信网络设备及器件	通信网络设备及器件
63	2016	中兴通讯	BBB	6	80.35	B	72.08	BB	79.76	BBB	84.96	计算机、通信和其他电子设备制造业	通信网络设备及器件	通信网络设备及器件
63	2017	中兴通讯	BB	5	79.63	BBB	83.01	BB	77.17	BB	79.57	计算机、通信和其他电子设备制造业	通信网络设备及器件	通信网络设备及器件
63	2018	中兴通讯	BB	5	79.9	A	87.25	B	74.82	BB	79.58	计算机、通信和其他电子设备制造业	通信网络设备及器件	通信网络设备及器件
63	2019	中兴通讯	BBB	6	80.65	A	87.46	BB	78.55	BB	78.59	计算机、通信和其他电子设备制造业	通信网络设备及器件	通信网络设备及器件
63	2020	中兴通讯	BBB	6	83.3	A	87.46	BBB	83.25	BBB	81.22	计算机、通信和其他电子设备制造业	通信网络设备及器件	通信网络设备及器件
63	2021	中兴通讯	BBB	6	84.89	BBB	80.34	A	86.02	A	85.87	计算机、通信和其他电子设备制造业	通信网络设备及器件	通信网络设备及器件
63	2022	中兴通讯	A	7	85.18	BB	77.71	A	86.29	A	87.53	计算机、通信和其他电子设备制造业	通信网络设备及器件	通信网络设备及器件
63	2023	中兴通讯	A	7	85.88	BB	79.02	A	88.2	A	86.72	计算机、通信和其他电子设备制造业	通信网络设备及器件	通信网络设备及器件
63	2024	中兴通讯	AA	8	92.37	BBB	83.03	A	85.53	A	88.17	计算机、通信和其他电子设备制造业	通信网络设备及器件	通信网络设备及器件
65	2009	北方国际	CCC	3	67.81	C	47.16	CCC	66.84	BB	78.67	土木工程建筑业	专业工程	国际工程
65	2010	北方国际	CCC	3	65.9	C	47.16	C	57.19	BBB	81.06	土木工程建筑业	专业工程	国际工程
65	2011	北方国际	CC	2	62.67	C	48.56	CC	60.1	B	71.38	土木工程建筑业	专业工程	国际工程
65	2012	北方国际	B	4	70.18	C	56.48	BB	78.39	B	71.38	土木工程建筑业	专业工程	国际工程
65	2013	北方国际	B	4	74.68	CC	64.48	BB	77.64	BB	77.71	土木工程建筑业	专业工程	国际工程
65	2014	北方国际	BB	5	75.65	CC	63.32	B	72.02	BBB	84.2	土木工程建筑业	专业工程	国际工程
65	2015	北方国际	B	4	70.25	C	58.12	CCC	65.5	BB	79.47	土木工程建筑业	专业工程	国际工程
65	2016	北方国际	BB	5	76.6	CC	61.68	B	72.74	A	86.59	土木工程建筑业	专业工程	国际工程
65	2017	北方国际	BB	5	77.52	CC	63.25	BB	79.33	BBB	83.34	土木工程建筑业	专业工程	国际工程
65	2018	北方国际	BB	5	76.43	CCC	68.8	BB	75.71	BBB	80.69	土木工程建筑业	专业工程	国际工程
65	2019	北方国际	BB	5	78.57	CCC	69.4	BBB	83.73	BB	79.61	土木工程建筑业	专业工程	国际工程
65	2020	北方国际	BB	5	77.54	CCC	69.4	BBB	80.82	BB	79.34	土木工程建筑业	专业工程	国际工程
65	2021	北方国际	B	4	74.59	CC	62.91	BBB	82.61	BB	78.56	土木工程建筑业	专业工程	国际工程
65	2022	北方国际	B	4	72.54	CC	64.01	BBB	81.69	B	73.11	土木工程建筑业	专业工程	国际工程
65	2023	北方国际	BB	5	79.95	BB	75.06	A	89.45	BB	77.26	土木工程建筑业	专业工程	国际工程
65	2024	北方国际	BBB	6	84.32	BB	75.05	AA	90.33	BBB	81.34	土木工程建筑业	专业工程	国际工程
66	2009	中国长城	BB	5	77.57	B	74.38	B	72.46	BBB	82.64	计算机、通信和其他电子设备制造业	计算机设备Ⅲ	其他计算机设备
66	2010	中国长城	BB	5	78.73	B	72.8	BB	78.66	BBB	81.82	计算机、通信和其他电子设备制造业	计算机设备Ⅲ	其他计算机设备
66	2011	中国长城	BBB	6	81.79	BB	78.57	BBB	83.36	BBB	82.38	计算机、通信和其他电子设备制造业	计算机设备Ⅲ	其他计算机设备
66	2012	中国长城	BBB	6	82.69	BB	76.99	BBB	83.36	A	85.14	计算机、通信和其他电子设备制造业	计算机设备Ⅲ	其他计算机设备
66	2013	中国长城	BBB	6	82.18	BB	78.57	A	85	BBB	82.12	计算机、通信和其他电子设备制造业	计算机设备Ⅲ	其他计算机设备
66	2014	中国长城	BB	5	77.49	BB	76.78	BB	77.95	BB	77.55	计算机、通信和其他电子设备制造业	计算机设备Ⅲ	其他计算机设备
66	2015	中国长城	BB	5	78.72	BB	75.2	BB	77.16	BBB	81.56	计算机、通信和其他电子设备制造业	计算机设备Ⅲ	其他计算机设备
66	2016	中国长城	BB	5	76.72	B	72.48	B	74.82	BBB	80.18	计算机、通信和其他电子设备制造业	计算机设备Ⅲ	其他计算机设备
66	2017	中国长城	BBB	6	81.77	BB	77.85	BB	77.31	A	86.78	计算机、通信和其他电子设备制造业	计算机设备Ⅲ	其他计算机设备
66	2018	中国长城	BBB	6	84.83	BBB	81.87	BBB	84.17	A	86.78	计算机、通信和其他电子设备制造业	计算机设备Ⅲ	其他计算机设备
66	2019	中国长城	A	7	85.5	BBB	82.09	AA	90.37	BBB	83.96	计算机、通信和其他电子设备制造业	计算机设备Ⅲ	其他计算机设备
66	2020	中国长城	A	7	85.48	A	85.46	A	88.02	BBB	83.79	计算机、通信和其他电子设备制造业	计算机设备Ⅲ	其他计算机设备
66	2021	中国长城	BB	5	77.14	B	73.97	BBB	81.6	B	74.99	计算机、通信和其他电子设备制造业	计算机设备Ⅲ	其他计算机设备
66	2022	中国长城	BB	5	76.66	B	73.72	BBB	82.71	B	72.94	计算机、通信和其他电子设备制造业	计算机设备Ⅲ	其他计算机设备
66	2023	中国长城	BB	5	75.61	B	73.97	BB	77.69	B	74.68	计算机、通信和其他电子设备制造业	计算机设备Ⅲ	其他计算机设备
66	2024	中国长城	CCC	3	66.85	BB	75.23	BB	79.69	BB	75.1	计算机、通信和其他电子设备制造业	其他计算机设备	其他计算机设备
68	2009	华控赛格	B	4	70.29	C	52.96	CC	62.27	BBB	84.55	专业技术服务业	综合环境治理	综合环境治理
68	2010	华控赛格	CC	2	61.98	C	47.59	C	53.04	BB	75.35	专业技术服务业	综合环境治理	综合环境治理
68	2011	华控赛格	CC	2	62.91	C	47.59	C	53.04	BB	77.39	专业技术服务业	综合环境治理	综合环境治理
68	2012	华控赛格	CC	2	62.91	C	47.59	C	53.04	BB	77.39	专业技术服务业	综合环境治理	综合环境治理
68	2013	华控赛格	C	1	57.55	C	47.59	C	53.04	CCC	65.68	专业技术服务业	综合环境治理	综合环境治理
68	2014	华控赛格	CC	2	61.11	C	47.59	CC	64.8	CCC	65.53	专业技术服务业	综合环境治理	综合环境治理
68	2015	华控赛格	CCC	3	65.8	C	50.96	CC	64.8	B	74.05	专业技术服务业	综合环境治理	综合环境治理
68	2016	华控赛格	B	4	70.38	C	57.49	CCC	66.15	BB	79.82	专业技术服务业	综合环境治理	综合环境治理
68	2017	华控赛格	B	4	70.49	C	57.09	CC	64.8	BBB	81.18	专业技术服务业	综合环境治理	综合环境治理
68	2018	华控赛格	B	4	72.19	C	58.88	B	73.4	BB	78.17	专业技术服务业	综合环境治理	综合环境治理
68	2019	华控赛格	CCC	3	68.68	C	55.51	CCC	66.35	BB	76.97	专业技术服务业	综合环境治理	综合环境治理
68	2020	华控赛格	CCC	3	68.78	C	56.45	C	57.24	BBB	84.18	专业技术服务业	综合环境治理	综合环境治理
68	2021	华控赛格	B	4	70.76	C	56.14	B	70.22	BB	75.62	专业技术服务业	综合环境治理	综合环境治理
68	2022	华控赛格	CCC	3	67.32	C	56.14	B	71.85	CCC	67.11	专业技术服务业	综合环境治理	综合环境治理
68	2023	华控赛格	CCC	3	65.94	C	56.14	B	71.44	CC	64.53	专业技术服务业	综合环境治理	综合环境治理
68	2024	华控赛格	C	1	57.47	C	56.14	B	72.9	CC	64.18	批发业	综合环境治理	综合环境治理
69	2009	华侨城A	BBB	6	80.05	CC	62.48	BB	79.01	A	86.82	房地产业	商业地产	商业地产
69	2010	华侨城A	BB	5	79.8	C	51.51	BBB	84.32	BBB	84.85	房地产业	商业地产	商业地产
69	2011	华侨城A	A	7	86.33	CCC	65.63	AA	92.3	A	87.5	房地产业	商业地产	商业地产
69	2012	华侨城A	BBB	6	80.62	CC	61.64	BBB	81.81	A	85.74	房地产业	商业地产	商业地产
69	2013	华侨城A	BBB	6	84.93	CC	64.05	A	85.78	AA	91.01	房地产业	商业地产	商业地产
69	2014	华侨城A	BBB	6	84.88	CCC	66.08	BBB	84.95	AA	91.01	房地产业	商业地产	商业地产
69	2015	华侨城A	A	7	85.81	CCC	66.08	A	89.96	A	88.39	房地产业	商业地产	商业地产
69	2016	华侨城A	BBB	6	82.17	CC	64.28	BBB	82.77	A	87.5	房地产业	商业地产	商业地产
69	2017	华侨城A	BB	5	78.86	C	59.39	BB	79.31	BBB	84.85	房地产业	商业地产	商业地产
69	2018	华侨城A	BBB	6	84.92	CC	63.6	BBB	84.02	AA	92.79	房地产业	商业地产	商业地产
69	2019	华侨城A	BBB	6	83.07	B	71.71	BBB	82.35	A	87.5	房地产业	商业地产	商业地产
69	2020	华侨城A	BBB	6	84.67	B	71.71	A	86.2	A	87.5	房地产业	商业地产	商业地产
69	2021	华侨城A	BB	5	76.41	CCC	69.23	BB	77.68	BBB	81.07	房地产业	商业地产	商业地产
69	2022	华侨城A	BBB	6	82.07	BB	76.16	A	85.72	BBB	83.96	房地产业	商业地产	商业地产
69	2023	华侨城A	BB	5	76.72	B	73.05	BBB	84.17	B	73.99	房地产业	商业地产	商业地产
69	2024	华侨城A	B	4	71.24	B	71.88	BBB	83.77	B	73.13	房地产业	旅游综合	商业地产
70	2009	特发信息	B	4	71.89	C	55.35	CCC	69.96	BBB	81.64	电气机械和器材制造业	通信线缆及配套	通信线缆及配套
70	2010	特发信息	B	4	71.42	C	53.56	B	71.68	BBB	80.36	电气机械和器材制造业	通信线缆及配套	通信线缆及配套
70	2011	特发信息	B	4	70.78	C	53.56	B	70.82	BB	79.54	电气机械和器材制造业	通信线缆及配套	通信线缆及配套
70	2012	特发信息	B	4	70.91	C	53.56	B	70.82	BB	79.82	电气机械和器材制造业	通信线缆及配套	通信线缆及配套
70	2013	特发信息	CCC	3	69.96	C	53.56	CC	64.8	BBB	81.82	电气机械和器材制造业	通信线缆及配套	通信线缆及配套
70	2014	特发信息	CCC	3	69.23	C	55.14	CC	62.45	BBB	81	电气机械和器材制造业	通信线缆及配套	通信线缆及配套
70	2015	特发信息	CCC	3	68.44	C	51.77	CC	62.45	BBB	81	电气机械和器材制造业	通信线缆及配套	通信线缆及配套
70	2016	特发信息	CCC	3	69.58	C	55.14	CC	64.8	BBB	80.18	电气机械和器材制造业	通信线缆及配套	通信线缆及配套
70	2017	特发信息	CCC	3	69.42	C	47.61	CCC	68.24	BBB	81.36	电气机械和器材制造业	通信线缆及配套	通信线缆及配套
70	2018	特发信息	B	4	70.45	C	50.57	CCC	69.59	BBB	81.18	电气机械和器材制造业	通信线缆及配套	通信线缆及配套
70	2019	特发信息	CCC	3	66	C	50.78	C	56.48	BBB	80.18	电气机械和器材制造业	通信线缆及配套	通信线缆及配套
70	2020	特发信息	CCC	3	67.39	C	54.95	C	57.84	BBB	80.18	电气机械和器材制造业	通信线缆及配套	通信线缆及配套
70	2021	特发信息	B	4	72.79	CC	64.94	BB	75.18	B	74.02	电气机械和器材制造业	通信线缆及配套	通信线缆及配套
70	2022	特发信息	B	4	74.22	CC	64.94	BB	79.22	B	73.52	电气机械和器材制造业	通信线缆及配套	通信线缆及配套
70	2023	特发信息	BB	5	79.18	CCC	69.84	BBB	84.58	BB	78.11	电气机械和器材制造业	通信线缆及配套	通信线缆及配套
70	2024	ST特信	CCC	3	65.74	CCC	66.06	BBB	81.68	CCC	67.12	电气机械和器材制造业	通信线缆及配套	通信线缆及配套
78	2009	海王生物	B	4	72.33	C	49.66	BBB	80.46	BB	79.34	零售业	医药商业Ⅲ	医药流通
78	2010	海王生物	B	4	73.34	C	53.35	AAA	100	B	73.14	零售业	医药商业Ⅲ	医药流通
78	2011	海王生物	B	4	73.09	C	53.54	AAA	100	B	72.61	零售业	医药商业Ⅲ	医药流通
78	2012	海王生物	B	4	71.17	C	47.67	AAA	100	B	71.75	零售业	医药商业Ⅲ	医药流通
78	2013	海王生物	B	4	74.29	CCC	66.88	AAA	95.12	B	70.63	零售业	医药商业Ⅲ	医药流通
78	2014	海王生物	BB	5	75.13	CCC	66.88	AAA	95.12	B	72.09	零售业	医药商业Ⅲ	医药流通
78	2015	海王生物	B	4	72.83	CC	61.21	AA	90.23	B	72.09	零售业	医药商业Ⅲ	医药流通
78	2016	海王生物	B	4	72.63	CC	61.21	BBB	80.46	B	74.95	零售业	医药商业Ⅲ	医药流通
78	2017	海王生物	BB	5	75.54	C	59.79	AAA	100	B	74.25	零售业	医药商业Ⅲ	医药流通
78	2018	海王生物	B	4	74.01	C	57.8	AAA	100	B	72.4	零售业	医药商业Ⅲ	医药流通
78	2019	海王生物	B	4	71.13	C	57.89	AAA	100	CCC	67.31	零售业	医药商业Ⅲ	医药流通
78	2020	海王生物	C	1	54.61	C	55.91	C	9.77	CCC	68.78	零售业	医药商业Ⅲ	医药流通
78	2021	海王生物	CCC	3	66.76	C	56.64	B	72.05	CCC	67.33	零售业	医药商业Ⅲ	医药流通
78	2022	海王生物	CCC	3	67.64	C	56.64	B	71.08	B	70.11	零售业	医药商业Ⅲ	医药流通
78	2023	海王生物	CCC	3	66.83	C	56.64	BB	76.11	CC	64.21	零售业	医药商业Ⅲ	医药流通
78	2024	海王生物	C	1	56.29	C	56.64	BB	76.74	CC	64.46	零售业	医药流通	医药流通
88	2009	盐田港	B	4	71.63	CC	63.48	C	42.4	A	89.12	道路运输业	港口	港口
88	2010	盐田港	B	4	74.89	CC	61.76	C	59.35	A	89.12	道路运输业	港口	港口
88	2011	盐田港	BB	5	75.17	CC	62.75	C	59.35	A	89.12	道路运输业	港口	港口
88	2012	盐田港	CCC	3	66.66	CC	60.54	C	34.8	BBB	84.16	道路运输业	港口	港口
88	2013	盐田港	B	4	72.95	CC	61.03	C	51.47	A	89.12	道路运输业	港口	港口
88	2014	盐田港	CCC	3	69.48	CC	61.76	C	59.35	BB	78.29	道路运输业	港口	港口
88	2015	盐田港	B	4	71.24	CC	61.03	C	56	BBB	83.7	道路运输业	港口	港口
88	2016	盐田港	B	4	72.6	CC	61.03	C	56	A	86.41	道路运输业	港口	港口
88	2017	盐田港	B	4	73.57	CCC	67.37	C	57.48	BBB	84.16	道路运输业	港口	港口
88	2018	盐田港	BB	5	76.88	CC	64.36	CCC	65.07	A	89.12	道路运输业	港口	港口
88	2019	盐田港	BB	5	75.89	CC	62.64	CC	60.54	AA	90.1	道路运输业	港口	港口
88	2020	盐田港	B	4	74.2	CC	60.92	CC	60.54	A	87.68	道路运输业	港口	港口
88	2021	盐田港	B	4	73.72	CC	61.37	B	72.44	BBB	83.05	道路运输业	港口	港口
88	2022	盐田港	B	4	74.16	CC	61.37	B	72.83	BBB	83.82	道路运输业	港口	港口
88	2023	盐田港	BB	5	76.47	CCC	68.75	BB	78.04	BBB	80.55	道路运输业	港口	港口
88	2024	盐田港	BB	5	77.77	B	70.31	BB	77.71	A	86.65	道路运输业	港口	港口
89	2009	深圳机场	BB	5	75.9	CC	63.32	CCC	68.8	A	86.07	航空运输业	机场	机场
89	2010	深圳机场	BB	5	76.36	CCC	68.51	CC	64.35	A	86.07	航空运输业	机场	机场
89	2011	深圳机场	BB	5	78.15	B	71.98	B	71.9	BBB	84.37	航空运输业	机场	机场
89	2012	深圳机场	B	4	73.59	CC	64.3	C	59.35	A	85.09	航空运输业	机场	机场
89	2013	深圳机场	B	4	72.21	CC	62.09	C	59.63	BBB	83.44	航空运输业	机场	机场
89	2014	深圳机场	B	4	70.62	CC	63.81	C	56.29	BBB	80.76	航空运输业	机场	机场
89	2015	深圳机场	CCC	3	69.99	CC	63.81	C	55.1	BBB	80.04	航空运输业	机场	机场
89	2016	深圳机场	BB	5	76.98	B	72.48	CCC	68.09	BBB	83.44	航空运输业	机场	机场
89	2017	深圳机场	BB	5	75.97	B	74.1	CCC	68.09	BBB	80.49	航空运输业	机场	机场
89	2018	深圳机场	BB	5	76.46	BB	75.86	CCC	68.09	BBB	80.49	航空运输业	机场	机场
89	2019	深圳机场	BBB	6	80	BB	79.3	BB	79.79	BBB	80.49	航空运输业	机场	机场
89	2020	深圳机场	BB	5	77.64	BB	79.3	B	70.72	BB	79.77	航空运输业	机场	机场
89	2021	深圳机场	B	4	73.06	CC	63.39	BB	79.18	BB	75.14	航空运输业	机场	机场
89	2022	深圳机场	B	4	73.34	CC	63.52	BB	77.5	BB	76.97	航空运输业	机场	机场
89	2023	深圳机场	B	4	73.39	CCC	67.5	BB	76.07	BB	75.43	航空运输业	机场	机场
89	2024	深圳机场	BBB	6	81.15	BB	78.73	BBB	83.76	BBB	80.57	航空运输业	机场	机场
90	2009	天健集团	CCC	3	67.4	C	49.08	CC	61.82	BBB	80.23	土木工程建筑业	住宅开发	住宅开发
90	2010	天健集团	CC	2	62.05	C	48.15	C	57.99	B	71.65	土木工程建筑业	住宅开发	住宅开发
90	2011	天健集团	CCC	3	67.86	C	46.28	CCC	69.21	BB	77.61	土木工程建筑业	住宅开发	住宅开发
90	2012	天健集团	CCC	3	69.3	C	53.99	CCC	67.99	BB	77.75	土木工程建筑业	住宅开发	住宅开发
90	2013	天健集团	B	4	70.7	C	57.16	CCC	66.77	BBB	80.04	土木工程建筑业	住宅开发	住宅开发
90	2014	天健集团	CCC	3	66.77	C	55.52	C	56.55	BB	79.25	土木工程建筑业	住宅开发	住宅开发
90	2015	天健集团	CCC	3	69.49	C	55.52	CCC	65.26	BB	79.25	土木工程建筑业	住宅开发	住宅开发
90	2016	天健集团	BB	5	75.42	CCC	66.93	CC	63.87	A	87.44	土木工程建筑业	住宅开发	住宅开发
90	2017	天健集团	CCC	3	69.86	CCC	66.86	C	51.55	BBB	83.74	土木工程建筑业	住宅开发	住宅开发
90	2018	天健集团	B	4	72.64	CCC	65.09	CCC	66.05	BBB	80.82	土木工程建筑业	住宅开发	住宅开发
90	2019	天健集团	BB	5	75.17	CC	63.82	B	72.76	BBB	82.41	土木工程建筑业	住宅开发	住宅开发
90	2020	天健集团	B	4	74.23	C	56.22	BB	76.47	BBB	81.62	土木工程建筑业	住宅开发	住宅开发
90	2021	天健集团	CCC	3	69.11	CC	64.79	CCC	69.38	B	72.49	土木工程建筑业	住宅开发	住宅开发
90	2022	天健集团	CCC	3	69.84	CC	63.59	CCC	66.75	BB	77.18	土木工程建筑业	住宅开发	住宅开发
90	2023	天健集团	BB	5	75.05	CC	63.59	BBB	81.77	BB	79.75	土木工程建筑业	住宅开发	住宅开发
90	2024	天健集团	CCC	3	66.14	CC	62.84	BB	77.31	BB	76	土木工程建筑业	住宅开发	住宅开发
96	2009	广聚能源	B	4	72.33	C	45.69	BB	75.58	BBB	82.65	批发业	油品石化贸易	油品石化贸易
96	2010	广聚能源	BB	5	76.38	C	45.69	AAA	95.12	BBB	83.35	批发业	油品石化贸易	油品石化贸易
96	2011	广聚能源	B	4	73.64	C	45.69	BBB	80.46	BBB	83.35	批发业	油品石化贸易	油品石化贸易
96	2012	广聚能源	B	4	73.69	C	49.66	BB	75.58	BBB	83.35	批发业	油品石化贸易	油品石化贸易
96	2013	广聚能源	BB	5	75.96	C	51.46	A	85.35	BBB	83.35	批发业	油品石化贸易	油品石化贸易
96	2014	广聚能源	BB	5	75.5	C	49.57	A	85.35	BBB	83.35	批发业	油品石化贸易	油品石化贸易
96	2015	广聚能源	BB	5	75.47	C	45.69	AA	90.23	BBB	83.35	批发业	油品石化贸易	油品石化贸易
96	2016	广聚能源	BB	5	75.04	C	47.67	A	85.35	BBB	83.35	批发业	油品石化贸易	油品石化贸易
96	2017	广聚能源	BB	5	76.09	C	48.24	AA	90.23	BBB	83.35	批发业	油品石化贸易	油品石化贸易
96	2018	广聚能源	BB	5	75.6	C	46.26	AA	90.23	BBB	83.35	批发业	油品石化贸易	油品石化贸易
96	2019	广聚能源	BB	5	76.53	C	50.04	AA	90.23	BBB	83.35	批发业	油品石化贸易	油品石化贸易
96	2020	广聚能源	BB	5	75.61	C	50.04	A	85.35	BBB	83.35	批发业	油品石化贸易	油品石化贸易
96	2021	广聚能源	B	4	72.65	CC	60.74	B	70.65	A	85.22	批发业	油品石化贸易	油品石化贸易
96	2022	广聚能源	B	4	72.63	CC	60.74	B	70.65	A	85.18	批发业	油品石化贸易	油品石化贸易
96	2023	广聚能源	B	4	73.19	C	59.41	BB	76.21	BBB	84.43	批发业	油品石化贸易	油品石化贸易
96	2024	广聚能源	CCC	3	68.78	C	59.41	B	73.8	BBB	84.68	批发业	油品石化贸易	油品石化贸易
99	2009	中信海直	CCC	3	67.17	C	58.65	C	46.03	BBB	81.29	航空运输业	航空运输	航空运输
99	2010	中信海直	B	4	71.17	C	58.65	CC	64.17	BBB	81.29	航空运输业	航空运输	航空运输
99	2011	中信海直	B	4	71.66	CC	60.37	CC	64.17	BBB	81.29	航空运输业	航空运输	航空运输
99	2012	中信海直	B	4	70.65	CC	60.37	C	59.63	BBB	81.29	航空运输业	航空运输	航空运输
99	2013	中信海直	B	4	70.21	C	58.65	C	58.19	BBB	82	航空运输业	航空运输	航空运输
99	2014	中信海直	B	4	70.62	CC	63.81	C	55.1	BBB	81.29	航空运输业	航空运输	航空运输
99	2015	中信海直	B	4	71.14	CC	62.09	C	59.63	BBB	81.29	航空运输业	航空运输	航空运输
99	2016	中信海直	B	4	70.18	C	56.93	C	59.63	BBB	82.27	航空运输业	航空运输	航空运输
99	2017	中信海直	CCC	3	67.5	C	55.32	C	51.75	BBB	81.29	航空运输业	航空运输	航空运输
99	2018	中信海直	CCC	3	67.5	C	55.32	C	51.75	BBB	81.29	航空运输业	航空运输	航空运输
99	2019	中信海直	CCC	3	66.38	C	56.93	C	59.6	B	74.67	航空运输业	航空运输	航空运输
99	2020	中信海直	CCC	3	69.62	CC	60.27	C	55.06	BBB	81.29	航空运输业	航空运输	航空运输
99	2021	中信海直	BB	5	78	CCC	67.63	BB	79.92	BBB	84.24	航空运输业	航空运输	航空运输
99	2022	中信海直	BB	5	75.67	CCC	67.63	BB	77.72	BBB	80.11	航空运输业	航空运输	航空运输
99	2023	中信海直	BB	5	77.06	CCC	68.1	B	74	A	85.77	航空运输业	航空运输	航空运输
99	2024	中信海直	BB	5	78.04	CCC	66.26	BBB	81.02	BBB	84.44	航空运输业	航空运输	航空运输
100	2009	TCL科技	BB	5	79.09	BB	78.74	CCC	67.69	A	86.96	计算机、通信和其他电子设备制造业	面板	面板
100	2010	TCL科技	BBB	6	82.08	BB	78.74	BB	78.6	A	86.14	计算机、通信和其他电子设备制造业	面板	面板
100	2011	TCL科技	BB	5	79.11	CCC	65.26	BB	76.75	A	87.78	计算机、通信和其他电子设备制造业	面板	面板
100	2012	TCL科技	BBB	6	82.25	BB	78.36	BB	78.74	A	86.6	计算机、通信和其他电子设备制造业	面板	面板
100	2013	TCL科技	BBB	6	81.13	BBB	80.15	BB	78.89	BBB	83.15	计算机、通信和其他电子设备制造业	面板	面板
100	2014	TCL科技	BB	5	79.15	BBB	80.15	B	74.9	BBB	81.51	计算机、通信和其他电子设备制造业	面板	面板
100	2015	TCL科技	BBB	6	80.32	BBB	83.2	B	72.74	BBB	83.96	计算机、通信和其他电子设备制造业	面板	面板
100	2016	TCL科技	BB	5	76.85	BB	78.04	CCC	68.65	BBB	81.77	计算机、通信和其他电子设备制造业	面板	面板
100	2017	TCL科技	BBB	6	81.55	BB	77.64	BB	77.96	A	85.96	计算机、通信和其他电子设备制造业	面板	面板
100	2018	TCL科技	BBB	6	80.2	BBB	81.22	B	70.9	A	85.96	计算机、通信和其他电子设备制造业	面板	面板
100	2019	TCL科技	BBB	6	81.48	B	74.62	BBB	80.31	A	85.77	计算机、通信和其他电子设备制造业	面板	面板
100	2020	TCL科技	BB	5	77.28	CCC	69.67	CCC	67.77	A	87.59	计算机、通信和其他电子设备制造业	面板	面板
100	2021	TCL科技	BBB	6	80.57	B	74.92	BBB	82.01	BBB	82.48	计算机、通信和其他电子设备制造业	面板	面板
100	2022	TCL科技	BB	5	77.24	B	74.92	BBB	81.91	BB	75.08	计算机、通信和其他电子设备制造业	面板	面板
100	2023	TCL科技	BB	5	76.15	BB	75.75	BBB	81.01	B	72.85	计算机、通信和其他电子设备制造业	面板	面板
100	2024	TCL科技	A	7	86.3	A	85.04	A	85.53	BBB	80.25	计算机、通信和其他电子设备制造业	面板	面板
150	2021	*ST宜康	CC	2	64.4	C	58.75	CCC	69.23	CC	63.23	卫生	其他医疗服务	医院
150	2022	*ST宜康	CC	2	60.33	C	58.75	CCC	69.74	C	53.14	卫生	其他医疗服务	医院
151	2009	中成股份	B	4	74.88	C	45.69	AAA	100	BB	79.11	批发业	贸易Ⅲ	贸易Ⅲ
151	2010	中成股份	B	4	72.53	C	45.69	A	85.35	BB	79.8	批发业	贸易Ⅲ	贸易Ⅲ
151	2011	中成股份	B	4	71.23	C	45.69	BBB	80.46	BB	79.11	批发业	贸易Ⅲ	贸易Ⅲ
151	2012	中成股份	B	4	71.03	C	47.67	A	85.35	BB	76.32	批发业	贸易Ⅲ	贸易Ⅲ
151	2013	中成股份	B	4	74.77	C	59.12	BB	75.58	BBB	81.19	批发业	贸易Ⅲ	贸易Ⅲ
151	2014	中成股份	BB	5	77.84	CCC	69.61	BBB	80.46	BBB	80.49	批发业	贸易Ⅲ	贸易Ⅲ
151	2015	中成股份	BBB	6	81.01	CCC	67.63	AAA	100	BBB	80.49	批发业	贸易Ⅲ	贸易Ⅲ
151	2016	中成股份	BBB	6	80.44	CC	61.85	AAA	100	BBB	81.96	批发业	贸易Ⅲ	贸易Ⅲ
151	2017	中成股份	BB	5	78.83	CC	62.42	AAA	95.12	BBB	80.49	批发业	贸易Ⅲ	贸易Ⅲ
151	2018	中成股份	BB	5	78.55	B	74.72	A	85.35	BB	77.95	批发业	贸易Ⅲ	贸易Ⅲ
151	2019	中成股份	BB	5	77.71	B	72.92	A	85.35	BB	77.26	批发业	贸易Ⅲ	贸易Ⅲ
151	2020	中成股份	BB	5	77.2	B	72.92	BBB	80.46	BB	77.95	批发业	贸易Ⅲ	贸易Ⅲ
151	2021	中成股份	B	4	71.18	C	59.46	BB	77.13	B	73.29	批发业	贸易Ⅲ	贸易Ⅲ
151	2022	中成股份	CCC	3	69.96	C	59.46	BB	76.99	B	70.81	批发业	贸易Ⅲ	贸易Ⅲ
151	2023	中成股份	B	4	71.04	C	59.46	B	74.84	B	74.41	批发业	贸易Ⅲ	贸易Ⅲ
151	2024	中成股份	BBB	6	84.32	BBB	83.06	BBB	80.77	BBB	82.64	批发业	贸易Ⅲ	贸易Ⅲ
153	2009	丰原药业	B	4	72.95	C	57.61	B	70.19	BBB	82.64	医药制造业	化学制剂	化学制剂
153	2010	丰原药业	CCC	3	68.31	C	51.08	CC	63.77	BBB	80.18	医药制造业	化学制剂	化学制剂
153	2011	丰原药业	CCC	3	69.86	C	54.24	CCC	67.61	BB	79.36	医药制造业	化学制剂	化学制剂
153	2012	丰原药业	CCC	3	69.53	C	56.03	CCC	68.83	BB	76.9	医药制造业	化学制剂	化学制剂
153	2013	丰原药业	B	4	72.4	C	54.24	B	72.17	BBB	81.82	医药制造业	化学制剂	化学制剂
153	2014	丰原药业	CCC	3	69.12	C	54.24	CC	62.77	BBB	81	医药制造业	化学制剂	化学制剂
153	2015	丰原药业	CCC	3	68.59	C	54.24	CC	62.27	BBB	80.18	医药制造业	化学制剂	化学制剂
153	2016	丰原药业	CCC	3	68.53	C	50.87	CC	64.63	BBB	80.18	医药制造业	化学制剂	化学制剂
153	2017	丰原药业	CCC	3	67.97	C	45.82	CCC	67.84	BB	79.36	医药制造业	化学制剂	化学制剂
153	2018	丰原药业	CCC	3	65.93	C	45.61	CC	64.63	BB	77.18	医药制造业	化学制剂	化学制剂
153	2019	丰原药业	CCC	3	68.26	C	47.4	B	70.82	BB	77.18	医药制造业	化学制剂	化学制剂
153	2020	丰原药业	CCC	3	66.92	C	47.59	CCC	65.12	BB	78	医药制造业	化学制剂	化学制剂
153	2021	丰原药业	B	4	73.88	C	56.41	BB	75.22	BBB	80.91	医药制造业	化学制剂	化学制剂
153	2022	丰原药业	BB	5	75.21	C	56.41	BB	78.86	BBB	81.01	医药制造业	化学制剂	化学制剂
153	2023	丰原药业	B	4	73.76	C	56.41	BB	76.63	BB	79.51	医药制造业	化学制剂	化学制剂
153	2024	丰原药业	CCC	3	68.68	C	56.41	BB	75.72	BB	76.18	医药制造业	化学制剂	化学制剂
155	2009	川能动力	BB	5	77.06	CC	63.9	B	72.17	A	87.09	电力、热力生产和供应业	新能源发电	风力发电
155	2010	川能动力	BB	5	75.96	CC	63.9	CCC	69.82	A	86.27	电力、热力生产和供应业	新能源发电	风力发电
155	2011	川能动力	B	4	72.79	CC	61.07	CCC	68.83	BBB	81.44	电力、热力生产和供应业	新能源发电	风力发电
155	2012	川能动力	B	4	72.06	CC	61.07	CCC	66.47	BBB	81.44	电力、热力生产和供应业	新能源发电	风力发电
155	2013	川能动力	BB	5	75.34	CCC	66.72	CCC	68.1	BBB	84.63	电力、热力生产和供应业	新能源发电	风力发电
155	2014	川能动力	B	4	70.27	CC	63.9	CC	63.4	BB	78.16	电力、热力生产和供应业	新能源发电	风力发电
155	2015	川能动力	CCC	3	69.54	CC	63.9	CC	63.4	BB	76.58	电力、热力生产和供应业	新能源发电	风力发电
155	2016	川能动力	CCC	3	66.18	C	57.7	CC	60.91	B	74.06	电力、热力生产和供应业	新能源发电	风力发电
155	2017	川能动力	CCC	3	69.68	C	59.09	CC	63	BB	79.59	电力、热力生产和供应业	新能源发电	风力发电
155	2018	川能动力	B	4	73.04	C	55.72	B	74.26	BBB	81.07	电力、热力生产和供应业	新能源发电	风力发电
155	2019	川能动力	B	4	71.26	C	50.77	BB	76.11	BB	78.46	电力、热力生产和供应业	新能源发电	风力发电
155	2020	川能动力	B	4	71.75	C	53.06	BB	76.57	BB	77.82	电力、热力生产和供应业	新能源发电	风力发电
155	2021	川能动力	B	4	70.28	CC	62.18	B	72.46	BB	77.94	电力、热力生产和供应业	新能源发电	风力发电
155	2022	川能动力	B	4	70.56	CC	64.67	B	71.88	BB	76.27	电力、热力生产和供应业	新能源发电	风力发电
155	2023	川能动力	BB	5	75.57	BB	77.42	BBB	80.62	B	70.88	电力、热力生产和供应业	新能源发电	风力发电
155	2024	川能动力	B	4	70.34	B	74.95	BB	78.45	BB	76.07	电力、热力生产和供应业	新能源发电	风力发电
156	2009	华数传媒	B	4	72.92	C	58.6	CCC	66.18	A	86.17	广播、电视、电影和影视录音制作业	有线电视网络	电视广播Ⅲ
156	2010	华数传媒	BB	5	79.99	C	58.6	BBB	81.55	A	88.5	广播、电视、电影和影视录音制作业	有线电视网络	电视广播Ⅲ
156	2011	华数传媒	CCC	3	69.14	BB	76.08	C	51.33	BBB	83.17	广播、电视、电影和影视录音制作业	有线电视网络	电视广播Ⅲ
156	2012	华数传媒	CCC	3	68.81	CC	61.21	C	57.69	BBB	83.17	广播、电视、电影和影视录音制作业	有线电视网络	电视广播Ⅲ
156	2013	华数传媒	B	4	73.94	CC	61.21	BB	79.16	B	74.83	广播、电视、电影和影视录音制作业	有线电视网络	电视广播Ⅲ
156	2014	华数传媒	B	4	71.19	C	49.2	BB	76.78	BB	76.08	广播、电视、电影和影视录音制作业	有线电视网络	电视广播Ⅲ
156	2015	华数传媒	BB	5	76.45	C	56.38	B	73.39	A	88.83	广播、电视、电影和影视录音制作业	有线电视网络	电视广播Ⅲ
156	2016	华数传媒	BBB	6	80.23	C	57.41	BBB	81.87	A	89.33	广播、电视、电影和影视录音制作业	有线电视网络	电视广播Ⅲ
156	2017	华数传媒	BB	5	78.99	CCC	67.43	B	72.54	AA	90.67	广播、电视、电影和影视录音制作业	有线电视网络	电视广播Ⅲ
156	2018	华数传媒	BBB	6	81.83	BBB	82.43	B	73.12	AA	90	广播、电视、电影和影视录音制作业	有线电视网络	电视广播Ⅲ
156	2019	华数传媒	BBB	6	80.85	B	72.38	BB	75.51	AA	90	广播、电视、电影和影视录音制作业	有线电视网络	电视广播Ⅲ
156	2020	华数传媒	A	7	85.5	BBB	82.43	BB	76.52	AAA	95.67	广播、电视、电影和影视录音制作业	有线电视网络	电视广播Ⅲ
156	2021	华数传媒	BB	5	79.1	CC	61.33	BB	77.21	BBB	82.98	广播、电视、电影和影视录音制作业	有线电视网络	电视广播Ⅲ
156	2022	华数传媒	BB	5	77.46	CC	61.33	B	74.59	BBB	81.92	广播、电视、电影和影视录音制作业	有线电视网络	电视广播Ⅲ
156	2023	华数传媒	BB	5	78.14	B	71	BB	78.36	BB	78.89	广播、电视、电影和影视录音制作业	有线电视网络	电视广播Ⅲ
156	2024	华数传媒	BB	5	75.59	CCC	68	BB	76.55	BB	78.93	广播、电视、电影和影视录音制作业	电视广播	电视广播Ⅲ
157	2009	中联重科	BB	5	77.36	CCC	69.03	CCC	69.09	A	87.19	专用设备制造业	工程机械	工程机械整机
157	2010	中联重科	BB	5	76.46	CC	64.3	CCC	69.78	A	87.19	专用设备制造业	工程机械	工程机械整机
157	2011	中联重科	BB	5	76.94	CCC	67.24	CCC	69.09	A	87.19	专用设备制造业	工程机械	工程机械整机
157	2012	中联重科	B	4	74.42	C	56.43	CCC	69.09	A	87.19	专用设备制造业	工程机械	工程机械整机
157	2013	中联重科	BB	5	76.65	CC	60.02	B	73.62	A	87.19	专用设备制造业	工程机械	工程机械整机
157	2014	中联重科	BB	5	75.9	CCC	65.66	CCC	66.92	A	87.19	专用设备制造业	工程机械	工程机械整机
157	2015	中联重科	B	4	74.15	CCC	67.24	CC	60.04	A	87.19	专用设备制造业	工程机械	工程机械整机
157	2016	中联重科	B	4	74.5	CCC	67.24	CC	62.39	A	86.37	专用设备制造业	工程机械	工程机械整机
157	2017	中联重科	BB	5	75.68	CCC	67.94	CCC	69.2	BBB	83.99	专用设备制造业	工程机械	工程机械整机
157	2018	中联重科	B	4	72.3	C	58.92	B	70.06	BBB	80.63	专用设备制造业	工程机械	工程机械整机
157	2019	中联重科	BB	5	77.77	CC	60.71	BBB	82.12	BBB	83.55	专用设备制造业	工程机械	工程机械整机
157	2020	中联重科	BB	5	78.57	CC	62.5	BBB	82.12	BBB	84.37	专用设备制造业	工程机械	工程机械整机
157	2021	中联重科	BB	5	77.71	B	72.26	BBB	81.53	BB	79.55	专用设备制造业	工程机械	工程机械整机
157	2022	中联重科	BB	5	78.09	BB	75.39	BB	78.15	BBB	80.16	专用设备制造业	工程机械	工程机械整机
157	2023	中联重科	BBB	6	81.88	BB	75.92	A	85.93	BBB	83.96	专用设备制造业	工程机械	工程机械整机
157	2024	中联重科	BBB	6	82.43	B	74.22	BB	79.17	BBB	84.65	专用设备制造业	工程机械Ⅲ	工程机械整机
158	2009	常山北明	CCC	3	67.3	C	52.87	C	53.04	BBB	84.28	软件和信息技术服务业	IT服务	IT服务Ⅲ
158	2010	常山北明	CCC	3	67.95	C	51.08	C	57.74	BBB	83.46	软件和信息技术服务业	IT服务	IT服务Ⅲ
158	2011	常山北明	CCC	3	68.72	C	52.87	CC	60.1	BBB	82.64	软件和信息技术服务业	IT服务	IT服务Ⅲ
158	2012	常山北明	CCC	3	68.45	C	51.08	CC	60.55	BBB	82.64	软件和信息技术服务业	IT服务	IT服务Ⅲ
158	2013	常山北明	CCC	3	69.99	C	55.82	CC	63.17	BBB	81.82	软件和信息技术服务业	IT服务	IT服务Ⅲ
158	2014	常山北明	CCC	3	67.98	C	52.45	C	58.01	BBB	82.64	软件和信息技术服务业	IT服务	IT服务Ⅲ
158	2015	常山北明	CCC	3	66.99	C	54.24	C	59.25	BB	78.72	软件和信息技术服务业	IT服务	IT服务Ⅲ
158	2016	常山北明	B	4	70.52	C	54.03	B	70.84	BB	78.72	软件和信息技术服务业	IT服务	IT服务Ⅲ
158	2017	常山北明	CCC	3	69.45	C	52.56	BB	75.77	B	73.8	软件和信息技术服务业	IT服务	IT服务Ⅲ
158	2018	常山北明	B	4	71.05	CCC	67.23	B	73.01	B	71.67	软件和信息技术服务业	IT服务	IT服务Ⅲ
158	2019	常山北明	B	4	73.29	BB	75.4	BBB	81.96	CCC	68.37	软件和信息技术服务业	IT服务	IT服务Ⅲ
158	2020	常山北明	BB	5	75.93	BB	77.08	BB	77.31	B	74.74	软件和信息技术服务业	IT服务	IT服务Ⅲ
158	2021	常山北明	B	4	72.62	CC	60.97	B	74.19	BB	79.7	软件和信息技术服务业	IT服务	IT服务Ⅲ
158	2022	常山北明	B	4	72.43	CC	60.97	BB	75.87	BB	78.02	软件和信息技术服务业	IT服务	IT服务Ⅲ
158	2023	常山北明	CCC	3	69.64	CC	60.97	CCC	67.78	BB	77.11	软件和信息技术服务业	IT服务	IT服务Ⅲ
158	2024	常山北明	CC	2	63.25	CC	60.17	BB	77.46	B	74.01	软件和信息技术服务业	IT服务Ⅲ	IT服务Ⅲ
159	2009	国际实业	B	4	72.84	C	59.31	BB	75.58	BB	77.72	批发业	专业工程	钢结构
159	2010	国际实业	B	4	71.65	C	59.31	BB	75.58	BB	75.64	批发业	专业工程	钢结构
159	2011	国际实业	CC	2	62.53	C	47.67	BB	75.58	CC	64.6	批发业	专业工程	钢结构
159	2012	国际实业	B	4	71.8	C	49.66	AAA	100	B	72.01	批发业	专业工程	钢结构
159	2013	国际实业	B	4	70.56	C	47.67	A	85.35	BB	75.48	批发业	专业工程	钢结构
159	2014	国际实业	B	4	72.96	C	55.43	AA	90.23	B	74.79	批发业	专业工程	钢结构
159	2015	国际实业	B	4	74.94	C	47.58	AAA	100	BB	78.41	批发业	专业工程	钢结构
159	2016	国际实业	B	4	72.35	C	53.54	BBB	80.46	BB	77.72	批发业	专业工程	钢结构
159	2017	国际实业	B	4	70.63	C	50.23	BB	75.58	BB	77.72	批发业	专业工程	钢结构
159	2018	国际实业	CCC	3	69.43	C	57.8	BB	75.58	B	72.39	批发业	专业工程	钢结构
159	2019	国际实业	CCC	3	69.66	C	55.81	BB	75.58	B	73.63	批发业	专业工程	钢结构
159	2020	国际实业	B	4	73.92	C	59.79	BBB	80.46	BB	77.81	批发业	专业工程	钢结构
159	2021	国际实业	B	4	73.67	CC	62.07	BB	77.59	BBB	82.28	批发业	专业工程	钢结构
159	2022	国际实业	B	4	70.43	CC	62.07	B	72.05	BB	77.39	批发业	专业工程	钢结构
159	2023	国际实业	CCC	3	65.98	CC	60.74	B	73.24	CCC	66.47	批发业	专业工程	钢结构
159	2024	国际实业	CC	2	60.71	C	59.41	B	71.58	B	74.56	批发业	光伏辅材	光伏辅材
166	2015	申万宏源	BBB	6	82.29	CCC	68.53	BBB	81.96	A	89.07	资本市场服务	证券Ⅲ	证券Ⅲ
166	2016	申万宏源	BBB	6	81.48	CC	63.07	BBB	83.17	A	89.07	资本市场服务	证券Ⅲ	证券Ⅲ
166	2017	申万宏源	BB	5	76.27	CC	64.33	CCC	68.74	A	87.22	资本市场服务	证券Ⅲ	证券Ⅲ
166	2018	申万宏源	BB	5	78.24	CCC	69.55	B	72.63	A	86.29	资本市场服务	证券Ⅲ	证券Ⅲ
166	2019	申万宏源	BB	5	77.61	CCC	69.55	CCC	67.66	A	88.4	资本市场服务	证券Ⅲ	证券Ⅲ
166	2020	申万宏源	BB	5	78.8	B	73.73	CCC	68.98	A	88.06	资本市场服务	证券Ⅲ	证券Ⅲ
166	2021	申万宏源	BBB	6	83.48	B	71.36	A	89.19	BBB	83.02	资本市场服务	证券Ⅲ	证券Ⅲ
166	2022	申万宏源	BBB	6	82.92	B	74.61	BBB	80.41	A	86.92	资本市场服务	证券Ⅲ	证券Ⅲ
166	2023	申万宏源	A	7	85.18	CCC	68.51	A	88.99	A	87.26	资本市场服务	证券Ⅲ	证券Ⅲ
166	2024	申万宏源	AA	8	93.99	CCC	66.54	A	89.45	A	89.31	资本市场服务	证券Ⅲ	证券Ⅲ
301	2009	东方盛虹	BB	5	75.49	CC	62.12	CCC	68.34	A	86.13	化学纤维制造业	涤纶	炼油化工
301	2010	东方盛虹	BB	5	76.27	C	58.4	B	73.07	A	86.7	化学纤维制造业	涤纶	炼油化工
301	2011	东方盛虹	BBB	6	80.54	CC	60.19	BBB	82.76	A	88.95	化学纤维制造业	涤纶	炼油化工
301	2012	东方盛虹	BB	5	77	C	55.5	BBB	82.76	BBB	83.86	化学纤维制造业	涤纶	炼油化工
301	2013	东方盛虹	BB	5	77.13	C	55.5	BB	78.71	A	86.53	化学纤维制造业	涤纶	炼油化工
301	2014	东方盛虹	BB	5	78.84	C	57.69	BB	79.87	A	88.33	化学纤维制造业	涤纶	炼油化工
301	2015	东方盛虹	B	4	74.39	C	54.54	B	73.68	BBB	84.3	化学纤维制造业	涤纶	炼油化工
301	2016	东方盛虹	BB	5	79.84	CC	64.09	BBB	82.76	A	85.64	化学纤维制造业	涤纶	炼油化工
301	2017	东方盛虹	BB	5	79.62	C	57.86	BBB	83.99	A	87.43	化学纤维制造业	涤纶	炼油化工
301	2018	东方盛虹	CCC	3	66.29	C	53.76	CCC	68.52	B	70.95	化学纤维制造业	涤纶	炼油化工
301	2019	东方盛虹	CCC	3	69.2	C	51.71	B	71.31	BB	76.7	化学纤维制造业	涤纶	炼油化工
301	2020	东方盛虹	B	4	74.98	C	52.93	B	74.25	A	86.72	化学纤维制造业	涤纶	炼油化工
301	2021	东方盛虹	B	4	71.47	CC	61.77	B	74.47	BBB	80.75	化学纤维制造业	涤纶	炼油化工
301	2022	东方盛虹	B	4	72.31	CC	62.32	B	74.42	BBB	82.51	化学纤维制造业	涤纶	炼油化工
301	2023	东方盛虹	BB	5	79.6	BB	75.69	BBB	80.75	BBB	83.38	化学纤维制造业	涤纶	炼油化工
301	2024	东方盛虹	BB	5	79.38	BB	77.35	BB	77.34	BBB	80.9	化学纤维制造业	石油加工	炼油化工
333	2013	美的集团	CCC	3	66.29	C	53	C	54.28	BBB	81.18	电气机械和器材制造业	空调	空调
333	2014	美的集团	BB	5	78.97	CCC	67.11	BB	79.37	BBB	84.76	电气机械和器材制造业	空调	空调
333	2015	美的集团	B	4	71.14	CC	60.09	CC	64.63	BBB	81.18	电气机械和器材制造业	空调	空调
333	2016	美的集团	B	4	72.66	CC	62.5	CC	64.21	BBB	83.55	电气机械和器材制造业	空调	空调
333	2017	美的集团	BB	5	78.59	CCC	66.37	BBB	80.46	BBB	83.55	电气机械和器材制造业	空调	空调
333	2018	美的集团	B	4	74.91	C	58.93	BB	75.93	BBB	82.38	电气机械和器材制造业	空调	空调
333	2019	美的集团	B	4	70.72	CC	62.79	BB	75.8	B	71.35	电气机械和器材制造业	空调	空调
333	2020	美的集团	B	4	72.67	CC	62.79	B	73.31	BB	77.28	电气机械和器材制造业	空调	空调
333	2021	美的集团	BB	5	75.31	CCC	67.33	BB	79.55	BB	76.19	电气机械和器材制造业	空调	空调
333	2022	美的集团	BB	5	78.02	CCC	68.63	BBB	81.07	BBB	80.74	电气机械和器材制造业	空调	空调
333	2023	美的集团	BB	5	79.65	B	70	BBB	81.43	BBB	83.65	电气机械和器材制造业	空调	空调
333	2024	美的集团	BBB	6	84.91	BB	79	BB	79.78	A	87.47	电气机械和器材制造业	空调	空调
338	2009	潍柴动力	BB	5	77.41	CC	60.28	BBB	81.8	BBB	83.2	汽车制造业	汽车零部件Ⅲ	底盘与发动机系统
338	2010	潍柴动力	BB	5	76.19	CCC	65.51	B	73.89	BBB	83.2	汽车制造业	汽车零部件Ⅲ	底盘与发动机系统
338	2011	潍柴动力	BB	5	75.81	CCC	65.51	BB	76.83	BBB	80.38	汽车制造业	汽车零部件Ⅲ	底盘与发动机系统
338	2012	潍柴动力	B	4	73.09	C	56.49	B	73.62	BBB	81.2	汽车制造业	汽车零部件Ⅲ	底盘与发动机系统
338	2013	潍柴动力	B	4	70.87	C	52.51	CCC	67.33	BBB	82.64	汽车制造业	汽车零部件Ⅲ	底盘与发动机系统
338	2014	潍柴动力	B	4	74.77	C	58.28	B	74.76	BBB	83.2	汽车制造业	汽车零部件Ⅲ	底盘与发动机系统
338	2015	潍柴动力	B	4	72.76	C	50.93	B	74.39	BBB	82.82	汽车制造业	汽车零部件Ⅲ	底盘与发动机系统
338	2016	潍柴动力	BB	5	75.49	CC	60.56	B	73.9	BBB	84.2	汽车制造业	汽车零部件Ⅲ	底盘与发动机系统
338	2017	潍柴动力	B	4	74.65	CC	60.37	B	70.46	BBB	84.76	汽车制造业	汽车零部件Ⅲ	底盘与发动机系统
338	2018	潍柴动力	BB	5	76.55	CC	61.95	BB	79.87	BBB	81.77	汽车制造业	汽车零部件Ⅲ	底盘与发动机系统
338	2019	潍柴动力	BB	5	77.35	CCC	66.68	BB	78.87	BBB	81.77	汽车制造业	汽车零部件Ⅲ	底盘与发动机系统
338	2020	潍柴动力	BB	5	76.79	CCC	65.11	BB	79.73	BBB	80.77	汽车制造业	汽车零部件Ⅲ	底盘与发动机系统
338	2021	潍柴动力	BBB	6	82.94	BBB	83	A	85.44	BBB	81.35	汽车制造业	汽车零部件Ⅲ	底盘与发动机系统
338	2022	潍柴动力	BBB	6	84.85	A	87.17	AA	92.54	BB	78.17	汽车制造业	汽车零部件Ⅲ	底盘与发动机系统
338	2023	潍柴动力	BBB	6	84.8	A	85.86	BBB	84.94	BBB	83.89	汽车制造业	汽车零部件Ⅲ	底盘与发动机系统
338	2024	潍柴动力	AA	8	90.84	A	85.06	BBB	84.57	BBB	84.52	汽车制造业	底盘与发动机系统	底盘与发动机系统
400	2009	许继电气	B	4	74.47	CC	63.32	CCC	68.77	BBB	84.02	电气机械和器材制造业	电气自控设备	电网自动化设备
400	2010	许继电气	B	4	74.84	CCC	69.72	CCC	66.31	BBB	83.2	电气机械和器材制造业	电气自控设备	电网自动化设备
400	2011	许继电气	B	4	73.63	CCC	69.72	CCC	68.31	BB	79.21	电气机械和器材制造业	电气自控设备	电网自动化设备
400	2012	许继电气	CCC	3	67.11	C	54.93	CC	60.45	BB	77.83	电气机械和器材制造业	电气自控设备	电网自动化设备
400	2013	许继电气	CCC	3	68.06	C	58.51	CC	62.27	BB	76.83	电气机械和器材制造业	电气自控设备	电网自动化设备
400	2014	许继电气	B	4	72.41	CCC	67.76	CCC	68.79	BB	77.21	电气机械和器材制造业	电气自控设备	电网自动化设备
400	2015	许继电气	BB	5	75.31	CCC	67.76	BB	78.2	BB	77.21	电气机械和器材制造业	电气自控设备	电网自动化设备
400	2016	许继电气	B	4	73.18	CCC	67.98	B	71.14	BB	77.21	电气机械和器材制造业	电气自控设备	电网自动化设备
400	2017	许继电气	BB	5	75.38	CCC	67.57	BB	78.31	BB	77.39	电气机械和器材制造业	电气自控设备	电网自动化设备
400	2018	许继电气	BB	5	75.29	CCC	69.15	BB	78.31	BB	76.4	电气机械和器材制造业	电气自控设备	电网自动化设备
400	2019	许继电气	BB	5	76.17	B	72.02	BB	77.77	BB	77.21	电气机械和器材制造业	电气自控设备	电网自动化设备
400	2020	许继电气	BB	5	75.34	CCC	68.44	BB	77.77	BB	77.21	电气机械和器材制造业	电气自控设备	电网自动化设备
400	2021	许继电气	B	4	72.39	CC	62.19	BBB	80.61	BB	76.03	电气机械和器材制造业	电气自控设备	电网自动化设备
400	2022	许继电气	B	4	70.54	CC	61.99	BB	79.25	B	72.47	电气机械和器材制造业	电气自控设备	电网自动化设备
400	2023	许继电气	BBB	6	82.02	BBB	82.16	A	86.56	BB	79.12	电气机械和器材制造业	电气自控设备	电网自动化设备
400	2024	许继电气	A	7	85.82	BBB	83.97	A	87.31	BB	75.9	电气机械和器材制造业	电气自控设备	电网自动化设备
401	2009	冀东水泥	BBB	6	83.31	BB	77.94	BBB	82.24	A	86.78	非金属矿物制品业	水泥	水泥制造
401	2010	冀东水泥	BBB	6	82.29	BBB	83.58	BB	78.76	BBB	84.02	非金属矿物制品业	水泥	水泥制造
401	2011	冀东水泥	BBB	6	80.68	BBB	80.21	BB	79.72	BBB	81.56	非金属矿物制品业	水泥	水泥制造
401	2012	冀东水泥	BBB	6	81.15	BBB	83.42	BBB	80.58	BBB	80.38	非金属矿物制品业	水泥	水泥制造
401	2013	冀东水泥	BBB	6	80.98	BBB	83.42	BBB	81.24	BB	79.57	非金属矿物制品业	水泥	水泥制造
401	2014	冀东水泥	B	4	70.87	BBB	85	BB	77.16	C	59.41	非金属矿物制品业	水泥	水泥制造
401	2015	冀东水泥	BB	5	75.13	BBB	83.2	BBB	82.73	CCC	65.88	非金属矿物制品业	水泥	水泥制造
401	2016	冀东水泥	B	4	72.92	BB	77.64	B	71.83	B	71.24	非金属矿物制品业	水泥	水泥制造
401	2017	冀东水泥	BB	5	78.02	CCC	68.73	B	74.5	A	85.14	非金属矿物制品业	水泥	水泥制造
401	2018	冀东水泥	BBB	6	81.25	BBB	81.68	A	86.37	BB	77.57	非金属矿物制品业	水泥	水泥制造
401	2019	冀东水泥	A	7	87.09	BBB	83.82	AA	94.21	BBB	83.96	非金属矿物制品业	水泥	水泥制造
401	2020	冀东水泥	AA	8	90.93	A	87.39	AAA	96.79	A	88.77	非金属矿物制品业	水泥	水泥制造
401	2021	冀东水泥	CCC	3	69.85	CC	61.15	BB	78.65	B	74.2	非金属矿物制品业	水泥	水泥制造
401	2022	冀东水泥	B	4	72.22	CCC	66.57	BB	79.46	B	74.03	非金属矿物制品业	水泥	水泥制造
401	2023	冀东水泥	B	4	73.03	CCC	67.78	BB	76.71	BB	76.74	非金属矿物制品业	水泥	水泥制造
401	2024	冀东水泥	B	4	73.32	B	71.58	BBB	81.68	BBB	80.3	非金属矿物制品业	水泥	水泥制造
402	2009	金融街	BBB	6	80.52	C	56.24	A	87.5	BBB	81.93	房地产业	住宅开发	商业地产
402	2010	金融街	BB	5	78.99	C	56.24	BBB	84.74	BBB	81.04	房地产业	住宅开发	商业地产
402	2011	金融街	BB	5	79.61	C	57.82	BBB	84.74	BBB	81.93	房地产业	住宅开发	商业地产
402	2012	金融街	BB	5	79.22	C	57.82	BBB	84.74	BBB	81.04	房地产业	住宅开发	商业地产
402	2013	金融街	BB	5	77.54	C	54.67	BBB	81.81	BBB	81.04	房地产业	住宅开发	商业地产
402	2014	金融街	B	4	73.12	C	56.53	BBB	80.26	B	71.83	房地产业	住宅开发	商业地产
402	2015	金融街	BB	5	77.15	C	55.79	BBB	83.02	BB	78.64	房地产业	住宅开发	商业地产
402	2016	金融街	BBB	6	82	C	58.11	A	87.78	BBB	84.41	房地产业	住宅开发	商业地产
402	2017	金融街	BB	5	78.82	C	52.41	BBB	84.74	BBB	81.93	房地产业	住宅开发	商业地产
402	2018	金融街	BB	5	79.93	CC	60.58	BBB	81.76	BBB	84.57	房地产业	住宅开发	商业地产
402	2019	金融街	BBB	6	80.03	C	56.75	BBB	84.27	BBB	83.68	房地产业	住宅开发	商业地产
402	2020	金融街	BBB	6	82.16	C	59.78	A	89.28	BBB	82.8	房地产业	住宅开发	商业地产
402	2021	金融街	B	4	74.19	CCC	68.08	BB	75.83	BB	77.73	房地产业	住宅开发	商业地产
402	2022	金融街	BB	5	79.99	BB	79.21	BBB	83.34	BB	78.07	房地产业	住宅开发	商业地产
402	2023	金融街	BBB	6	82.05	BBB	80.3	BB	78.24	A	86.28	房地产业	住宅开发	商业地产
402	2024	金融街	BBB	6	84.61	A	86.76	BB	78.46	BBB	81.74	房地产业	住宅开发	商业地产
403	2009	派林生物	B	4	72.15	C	57.61	BB	75.25	BB	77.49	医药制造业	血液制品	血液制品
403	2010	派林生物	CCC	3	65.77	C	57.61	CC	63.49	B	71.48	医药制造业	血液制品	血液制品
403	2011	派林生物	CC	2	61.12	C	51.08	C	59.06	CCC	67.64	医药制造业	血液制品	血液制品
403	2012	派林生物	C	1	54.07	C	51.08	CCC	68.7	C	45.72	医药制造业	血液制品	血液制品
403	2013	派林生物	C	1	55.67	C	49.29	CC	61.64	C	54.91	医药制造业	血液制品	血液制品
403	2014	派林生物	C	1	58.64	C	50.87	B	71.68	C	53.8	医药制造业	血液制品	血液制品
403	2015	派林生物	C	1	53.39	C	50.87	CC	62.77	C	48.34	医药制造业	血液制品	血液制品
403	2016	派林生物	CC	2	61.23	C	50.87	CC	64.63	CC	64.24	医药制造业	血液制品	血液制品
403	2017	派林生物	C	1	58.83	C	48.19	CC	63.13	CC	61.35	医药制造业	血液制品	血液制品
403	2018	派林生物	C	1	59.4	C	48.19	CCC	69.96	C	57.99	医药制造业	血液制品	血液制品
403	2019	派林生物	C	1	59.7	C	49.98	CCC	65.12	CC	61	医药制造业	血液制品	血液制品
403	2020	派林生物	CC	2	63.29	C	51.77	CC	62.14	CCC	69.95	医药制造业	血液制品	血液制品
403	2021	派林生物	B	4	71.05	C	56.41	B	73.48	BB	75.9	医药制造业	血液制品	血液制品
403	2022	派林生物	CCC	3	68.33	C	56.41	B	71.54	B	71.29	医药制造业	血液制品	血液制品
403	2023	派林生物	B	4	74.05	CC	63.28	BB	77.58	BB	76.22	医药制造业	血液制品	血液制品
403	2024	派林生物	BBB	6	81.9	CC	62.9	BBB	84.4	BBB	83.64	医药制造业	血液制品	血液制品
404	2009	长虹华意	B	4	73.42	C	59.25	B	71.68	BBB	81.82	通用设备制造业	其他白色家电	家电零部件Ⅲ
404	2010	长虹华意	CCC	3	69.81	C	50.5	CCC	67.84	BBB	81	通用设备制造业	其他白色家电	家电零部件Ⅲ
404	2011	长虹华意	CCC	3	66.3	C	48.79	CC	63.69	BB	77.01	通用设备制造业	其他白色家电	家电零部件Ⅲ
404	2012	长虹华意	CCC	3	68.06	C	57.45	CCC	65.26	BB	75.37	通用设备制造业	其他白色家电	家电零部件Ⅲ
404	2013	长虹华意	CCC	3	69.16	C	59.25	CCC	66.25	BB	76.19	通用设备制造业	其他白色家电	家电零部件Ⅲ
404	2014	长虹华意	B	4	74.37	CCC	66.3	BB	76.31	BB	77.19	通用设备制造业	其他白色家电	家电零部件Ⅲ
404	2015	长虹华意	BB	5	75.14	CC	62.93	BB	78.66	BB	79	通用设备制造业	其他白色家电	家电零部件Ⅲ
404	2016	长虹华意	B	4	72.82	CC	62.93	B	71.14	BB	79	通用设备制造业	其他白色家电	家电零部件Ⅲ
404	2017	长虹华意	BB	5	75.55	CCC	66.98	BB	75.42	BBB	80	通用设备制造业	其他白色家电	家电零部件Ⅲ
404	2018	长虹华意	B	4	73.83	CCC	68.56	BB	75.42	BB	75.46	通用设备制造业	其他白色家电	家电零部件Ⅲ
404	2019	长虹华意	BB	5	78.6	CCC	68.56	A	87.64	BB	77.64	通用设备制造业	其他白色家电	家电零部件Ⅲ
404	2020	长虹华意	BB	5	75.09	CC	60.06	BB	78.52	BBB	80.45	通用设备制造业	其他白色家电	家电零部件Ⅲ
404	2021	长虹华意	B	4	70.58	C	59.8	BB	77.57	B	74.56	通用设备制造业	其他白色家电	家电零部件Ⅲ
404	2022	长虹华意	B	4	73.2	CC	62.3	BB	78.19	BB	78.56	通用设备制造业	其他白色家电	家电零部件Ⅲ
404	2023	长虹华意	B	4	72.57	C	59.97	BB	79.64	BB	77.93	通用设备制造业	其他白色家电	家电零部件Ⅲ
404	2024	长虹华意	A	7	85.95	BBB	80.09	A	85.4	BBB	81.24	通用设备制造业	家电零部件	家电零部件Ⅲ
407	2009	胜利股份	BB	5	75.6	C	51.51	B	74.79	A	87.59	燃气生产和供应业	燃气Ⅲ	燃气Ⅲ
407	2010	胜利股份	B	4	72.87	C	49.58	B	71.9	BBB	84.57	燃气生产和供应业	燃气Ⅲ	燃气Ⅲ
407	2011	胜利股份	B	4	73.88	C	57.16	B	70.06	BBB	84.13	燃气生产和供应业	燃气Ⅲ	燃气Ⅲ
407	2012	胜利股份	C	1	59.37	C	50.94	CCC	65.58	C	59.72	燃气生产和供应业	燃气Ⅲ	燃气Ⅲ
407	2013	胜利股份	B	4	70.71	CC	62.42	BB	78.1	B	70.3	燃气生产和供应业	燃气Ⅲ	燃气Ⅲ
407	2014	胜利股份	B	4	71.53	C	53.29	BB	79.32	BB	75.61	燃气生产和供应业	燃气Ⅲ	燃气Ⅲ
407	2015	胜利股份	B	4	72.8	C	51.88	B	70.06	BBB	84.41	燃气生产和供应业	燃气Ⅲ	燃气Ⅲ
407	2016	胜利股份	B	4	74.77	C	49.95	BB	76.99	A	85.3	燃气生产和供应业	燃气Ⅲ	燃气Ⅲ
407	2017	胜利股份	BB	5	75.39	C	57.92	BB	76.99	BBB	82.79	燃气生产和供应业	燃气Ⅲ	燃气Ⅲ
407	2018	胜利股份	B	4	72.22	C	52.09	B	72.33	BBB	81.77	燃气生产和供应业	燃气Ⅲ	燃气Ⅲ
407	2019	胜利股份	CC	2	64.48	C	50.16	A	85.03	C	59.13	燃气生产和供应业	燃气Ⅲ	燃气Ⅲ
407	2020	胜利股份	CCC	3	68.44	C	47.09	BBB	80.98	B	71.21	燃气生产和供应业	燃气Ⅲ	燃气Ⅲ
407	2021	胜利股份	B	4	71.49	CC	63.14	BB	76.83	BB	77.08	燃气生产和供应业	燃气Ⅲ	燃气Ⅲ
407	2022	胜利股份	B	4	70.83	CC	62.86	BB	77.84	BB	75.18	燃气生产和供应业	燃气Ⅲ	燃气Ⅲ
407	2023	胜利股份	CCC	3	69.17	CC	61.32	BB	76.41	B	73.28	燃气生产和供应业	燃气Ⅲ	燃气Ⅲ
407	2024	胜利股份	CC	2	60.86	CC	64.63	BB	79.25	B	74.98	燃气生产和供应业	燃气Ⅲ	燃气Ⅲ
408	2009	藏格矿业	CCC	3	67	C	55.88	CC	63.13	BB	75.29	化学原料和化学制品制造业	钾肥	锂
408	2010	藏格矿业	C	1	58.04	C	45.76	C	57.74	CC	64.5	化学原料和化学制品制造业	钾肥	锂
408	2011	藏格矿业	C	1	57.05	C	45.76	C	53.04	CCC	65.53	化学原料和化学制品制造业	钾肥	锂
408	2012	藏格矿业	C	1	52.33	C	45.76	C	55.75	C	53.37	化学原料和化学制品制造业	钾肥	锂
408	2013	藏格矿业	CC	2	61.19	C	45.76	CC	60.1	CCC	69.8	化学原料和化学制品制造业	钾肥	锂
408	2014	藏格矿业	C	1	53.64	C	45.76	CC	62.45	C	51.73	化学原料和化学制品制造业	钾肥	锂
408	2015	藏格矿业	C	1	48.72	C	45.76	C	53.04	C	47.31	化学原料和化学制品制造业	钾肥	锂
408	2016	藏格矿业	C	1	56.92	C	45.76	C	53.04	CCC	65.23	化学原料和化学制品制造业	钾肥	锂
408	2017	藏格矿业	CCC	3	67.67	C	53.89	BBB	80.32	CCC	66.18	化学原料和化学制品制造业	钾肥	锂
408	2018	藏格矿业	B	4	70.34	C	58.84	B	70.32	BB	76.22	化学原料和化学制品制造业	钾肥	锂
408	2019	藏格矿业	C	1	52.47	C	58.84	CCC	65.02	C	40.74	化学原料和化学制品制造业	钾肥	锂
408	2020	藏格矿业	CC	2	61.2	C	55.47	B	73.26	C	55.99	化学原料和化学制品制造业	钾肥	锂
408	2021	藏格矿业	CC	2	64.11	C	59.37	B	73.61	CC	63.2	化学原料和化学制品制造业	钾肥	锂
408	2022	藏格矿业	CCC	3	67.79	C	59.37	B	74.9	B	72.8	化学原料和化学制品制造业	钾肥	锂
408	2023	藏格矿业	BB	5	75.88	B	72.65	B	74.73	BBB	80.43	化学原料和化学制品制造业	钾肥	锂
408	2024	藏格矿业	BBB	6	82.97	BB	77.7	A	85.38	BBB	80.95	化学原料和化学制品制造业	钾肥	锂
409	2009	云鼎科技	CCC	3	68.82	C	51.44	CCC	67	BB	78.05	软件和信息技术服务业	IT服务	IT服务Ⅲ
409	2010	云鼎科技	CCC	3	67.41	C	55.92	CC	63.83	BB	75.06	软件和信息技术服务业	IT服务	IT服务Ⅲ
409	2011	云鼎科技	CC	2	60.1	C	53.16	CC	62.08	CC	62.03	软件和信息技术服务业	IT服务	IT服务Ⅲ
409	2012	云鼎科技	CCC	3	68.66	C	53.16	CCC	69.47	BB	75.32	软件和信息技术服务业	IT服务	IT服务Ⅲ
409	2013	云鼎科技	B	4	73.51	C	49.73	B	73.04	BBB	84.83	软件和信息技术服务业	IT服务	IT服务Ⅲ
409	2014	云鼎科技	B	4	73.62	C	51.44	BBB	80.05	BB	79.7	软件和信息技术服务业	IT服务	IT服务Ⅲ
409	2015	云鼎科技	B	4	73.3	C	51.44	BBB	80.05	BB	79.01	软件和信息技术服务业	IT服务	IT服务Ⅲ
409	2016	云鼎科技	B	4	74.09	C	54.21	BB	78.38	BBB	80.51	软件和信息技术服务业	IT服务	IT服务Ⅲ
409	2017	云鼎科技	CC	2	60.37	C	47.74	CCC	68.53	CC	60.9	软件和信息技术服务业	IT服务	IT服务Ⅲ
409	2018	云鼎科技	C	1	59.43	C	51.69	CC	64.5	C	59.72	软件和信息技术服务业	IT服务	IT服务Ⅲ
409	2019	云鼎科技	C	1	55.22	C	49.45	CCC	65.78	C	51.01	软件和信息技术服务业	IT服务	IT服务Ⅲ
409	2020	云鼎科技	CC	2	61.75	C	53.51	CCC	66.86	CC	62.22	软件和信息技术服务业	IT服务	IT服务Ⅲ
409	2021	云鼎科技	CCC	3	69.19	C	56.14	B	72.46	B	70.56	软件和信息技术服务业	IT服务	IT服务Ⅲ
409	2022	云鼎科技	B	4	70.78	C	56.14	B	71.38	B	74.76	软件和信息技术服务业	IT服务	IT服务Ⅲ
409	2023	云鼎科技	B	4	74.8	C	57.29	BB	78.46	BB	77.21	软件和信息技术服务业	IT服务	IT服务Ⅲ
409	2024	云鼎科技	BB	5	78.38	CC	60.14	BBB	82.98	BB	79.46	软件和信息技术服务业	IT服务Ⅲ	IT服务Ⅲ
410	2009	沈阳机床	B	4	72.8	C	55.88	CCC	67.51	A	85.01	通用设备制造业	机床工具	机床工具
410	2010	沈阳机床	B	4	70.74	C	52.51	CCC	69.33	BBB	81	通用设备制造业	机床工具	机床工具
410	2011	沈阳机床	CCC	3	68.03	C	48.79	CCC	68.22	BB	77.72	通用设备制造业	机床工具	机床工具
410	2012	沈阳机床	CCC	3	69.18	C	49.35	CCC	67.61	BBB	80.36	通用设备制造业	机床工具	机床工具
410	2013	沈阳机床	B	4	71.43	C	52.82	BB	77.4	BB	76.9	通用设备制造业	机床工具	机床工具
410	2014	沈阳机床	B	4	71.15	C	56.19	B	73.95	BB	76.9	通用设备制造业	机床工具	机床工具
410	2015	沈阳机床	B	4	71.75	C	54.4	B	74.82	BB	78.54	通用设备制造业	机床工具	机床工具
410	2016	沈阳机床	C	1	57.91	C	54.4	CCC	66.44	C	53.94	通用设备制造业	机床工具	机床工具
410	2017	沈阳机床	C	1	58.24	C	54.21	CCC	66.44	C	54.77	通用设备制造业	机床工具	机床工具
410	2018	沈阳机床	CCC	3	66.7	C	55.79	BB	77.68	CC	64.87	通用设备制造业	机床工具	机床工具
410	2019	沈阳机床	CC	2	60.99	CC	60.02	BB	75.88	C	51.43	通用设备制造业	机床工具	机床工具
410	2020	沈阳机床	CCC	3	69.27	CC	61.82	BBB	80.58	CCC	65.44	通用设备制造业	机床工具	机床工具
410	2021	沈阳机床	CCC	3	66.94	C	56.79	BB	77.27	CCC	68.35	通用设备制造业	机床工具	机床工具
410	2022	沈阳机床	CCC	3	66.93	C	55.92	BB	75.29	B	70.25	通用设备制造业	机床工具	机床工具
410	2023	沈阳机床	BB	5	75.28	CCC	70	BBB	80.91	BB	75.85	通用设备制造业	机床工具	机床工具
410	2024	沈阳机床	BB	5	75.32	CCC	69.39	A	85.18	BB	75.2	通用设备制造业	机床工具	机床工具
411	2009	英特集团	BB	5	76.83	C	55.34	AAA	100	BB	78.41	批发业	医药商业Ⅲ	医药流通
411	2010	英特集团	BB	5	76.01	C	57.33	AAA	95.12	BB	77.72	批发业	医药商业Ⅲ	医药流通
411	2011	英特集团	BB	5	76.92	C	57.33	AAA	100	BB	77.72	批发业	医药商业Ⅲ	医药流通
411	2012	英特集团	BB	5	75.52	C	51.55	AAA	100	BB	77.72	批发业	医药商业Ⅲ	医药流通
411	2013	英特集团	B	4	74.18	C	51.46	AAA	95.12	BB	77.03	批发业	医药商业Ⅲ	医药流通
411	2014	英特集团	BB	5	75.93	C	51.46	AAA	100	BB	78.49	批发业	医药商业Ⅲ	医药流通
411	2015	英特集团	B	4	73.73	C	53.35	AA	90.23	BB	77.03	批发业	医药商业Ⅲ	医药流通
411	2016	英特集团	B	4	73.73	C	53.35	AA	90.23	BB	77.03	批发业	医药商业Ⅲ	医药流通
411	2017	英特集团	B	4	72.47	C	51.93	A	85.35	BB	77.03	批发业	医药商业Ⅲ	医药流通
411	2018	英特集团	B	4	74.16	C	51.93	AAA	100	BB	75.18	批发业	医药商业Ⅲ	医药流通
411	2019	英特集团	B	4	70.96	C	50.04	A	85.35	BB	75.18	批发业	医药商业Ⅲ	医药流通
411	2020	英特集团	B	4	74.58	C	52.03	AAA	100	BB	75.87	批发业	医药商业Ⅲ	医药流通
411	2021	英特集团	B	4	72.4	C	56.64	BB	75.75	BB	77.23	批发业	医药商业Ⅲ	医药流通
411	2022	英特集团	B	4	74.72	C	56.64	BB	78.66	BBB	80.17	批发业	医药商业Ⅲ	医药流通
411	2023	英特集团	B	4	73.77	C	56.64	BB	75.44	BBB	80.6	批发业	医药商业Ⅲ	医药流通
411	2024	英特集团	BB	5	77.08	C	56.64	BBB	84.45	BBB	83.12	批发业	医药流通	医药流通
413	2009	东旭光电	CCC	3	69.98	C	57.45	C	57.74	BBB	84.63	计算机、通信和其他电子设备制造业	面板	面板
413	2010	东旭光电	CCC	3	67.36	C	54.08	C	57.74	BBB	80.62	计算机、通信和其他电子设备制造业	面板	面板
413	2011	东旭光电	CCC	3	65.59	C	54.3	C	53.04	BB	79.82	计算机、通信和其他电子设备制造业	面板	面板
413	2012	东旭光电	CCC	3	65.99	C	56.09	CC	60.1	BB	75.02	计算机、通信和其他电子设备制造业	面板	面板
413	2013	东旭光电	B	4	71.59	C	56.09	B	73.4	BB	78.29	计算机、通信和其他电子设备制造业	面板	面板
413	2014	东旭光电	B	4	70.84	C	56.09	B	73.4	BB	76.65	计算机、通信和其他电子设备制造业	面板	面板
413	2015	东旭光电	CCC	3	68.27	C	56.09	CC	64.8	BB	76.83	计算机、通信和其他电子设备制造业	面板	面板
413	2016	东旭光电	B	4	71.3	C	56.09	CC	64.8	BBB	83.46	计算机、通信和其他电子设备制造业	面板	面板
413	2017	东旭光电	BB	5	77.3	CCC	67.11	B	70.06	A	87.39	计算机、通信和其他电子设备制造业	面板	面板
413	2018	东旭光电	B	4	73.98	C	55.75	BB	78.55	BBB	80.2	计算机、通信和其他电子设备制造业	面板	面板
413	2019	东旭光电	CCC	3	68.64	C	47.15	B	72.77	BB	76.82	计算机、通信和其他电子设备制造业	面板	面板
413	2020	东旭光电	C	1	52.61	C	58.84	CCC	67.79	C	39.19	计算机、通信和其他电子设备制造业	面板	面板
413	2021	东旭光电	CCC	3	68.55	CCC	68.08	BB	76.84	CC	62.79	计算机、通信和其他电子设备制造业	面板	面板
413	2022	东旭光电	CCC	3	66.8	CCC	68.08	B	73.11	CC	61.58	计算机、通信和其他电子设备制造业	面板	面板
413	2023	东旭光电	CCC	3	69.99	B	70.58	B	71.1	CCC	68.88	计算机、通信和其他电子设备制造业	面板	面板
415	2009	渤海租赁	CCC	3	68.49	C	52.51	CCC	68.09	BB	78.87	租赁业	多元金融	租赁
415	2010	渤海租赁	B	4	70.31	C	56.85	CCC	68.94	BB	79.7	租赁业	多元金融	租赁
415	2011	渤海租赁	CCC	3	68.34	C	50.86	CCC	66.91	BBB	80.33	租赁业	多元金融	租赁
415	2012	渤海租赁	CC	2	61.81	C	55.51	C	56.34	CCC	69.36	租赁业	多元金融	租赁
415	2013	渤海租赁	CCC	3	67.44	C	51.37	BB	78.77	B	70.24	租赁业	多元金融	租赁
415	2014	渤海租赁	CCC	3	68.47	C	56.96	BBB	81.54	CCC	67.25	租赁业	多元金融	租赁
415	2015	渤海租赁	CC	2	63.64	C	54.16	CC	61.44	B	71.07	租赁业	多元金融	租赁
415	2016	渤海租赁	CCC	3	66.55	C	52.71	CCC	66.54	BB	75.3	租赁业	多元金融	租赁
415	2017	渤海租赁	B	4	71.69	C	53.09	BBB	82.92	BB	76.14	租赁业	多元金融	租赁
415	2018	渤海租赁	B	4	73.11	C	57.26	BBB	84.3	BB	75.85	租赁业	多元金融	租赁
415	2019	渤海租赁	CC	2	64.43	CC	60.78	BBB	80.58	C	56.21	租赁业	多元金融	租赁
415	2020	渤海租赁	CCC	3	66.84	CC	62.22	B	71.55	CCC	66.69	租赁业	多元金融	租赁
415	2021	渤海租赁	CCC	3	68.45	CC	60.62	B	71.66	CCC	67.81	租赁业	多元金融	租赁
415	2022	渤海租赁	B	4	70.45	CC	60.62	B	72.13	B	71.46	租赁业	多元金融	租赁
415	2023	渤海租赁	B	4	71.22	CC	60.62	B	74.17	B	71.42	租赁业	多元金融	租赁
415	2024	渤海租赁	C	1	56.51	CCC	69	BB	77.97	CCC	69.21	租赁业	多元金融Ⅲ	租赁
416	2009	*ST民控	B	4	72.38	C	59.69	C	54.4	AA	90.97	其他金融业	多元金融	金融控股
416	2010	*ST民控	B	4	71.27	C	59.69	C	52.27	AA	90.04	其他金融业	多元金融	金融控股
416	2011	*ST民控	B	4	71.27	C	59.69	C	52.27	AA	90.04	其他金融业	多元金融	金融控股
416	2012	*ST民控	B	4	71.05	C	55.19	CC	61.31	A	85.4	其他金融业	多元金融	金融控股
416	2013	*ST民控	CCC	3	69.53	CC	64.53	C	52.27	BBB	83.95	其他金融业	多元金融	金融控股
416	2014	*ST民控	CCC	3	68.39	CC	62.28	B	74.86	CCC	66.8	其他金融业	多元金融	金融控股
416	2015	*ST民控	CCC	3	65.51	CC	64.53	C	52.27	BB	75.21	其他金融业	多元金融	金融控股
416	2016	*ST民控	BB	5	75.97	CC	63.67	B	74.86	BBB	82.61	其他金融业	多元金融	金融控股
416	2017	*ST民控	B	4	70.42	CC	61.66	C	52.27	A	87.26	其他金融业	多元金融	金融控股
416	2018	*ST民控	CCC	3	70	C	59.41	C	54.7	A	85.71	其他金融业	多元金融	金融控股
416	2019	*ST民控	B	4	72	CC	61.66	CC	60.75	BBB	84.78	其他金融业	多元金融	金融控股
416	2020	*ST民控	B	4	72.37	CC	62.53	CC	61.31	BBB	84.78	其他金融业	多元金融	金融控股
416	2021	*ST民控	CCC	3	69.68	CC	60.62	B	73.03	CCC	69.23	其他金融业	多元金融	金融控股
416	2022	*ST民控	CCC	3	70	CC	60.62	B	70.11	B	72.12	其他金融业	多元金融	金融控股
416	2023	*ST民控	CCC	3	67.82	CC	60.62	B	70.11	CCC	67.74	其他金融业	多元金融	金融控股
417	2009	合肥百货	BB	5	78.35	C	51.65	AAA	100	BBB	82.65	零售业	百货零售	多业态零售
417	2010	合肥百货	BB	5	76.13	C	51.65	AA	90.23	BBB	81.96	零售业	百货零售	多业态零售
417	2011	合肥百货	BB	5	79.94	C	51.65	AAA	100	A	85.44	零售业	百货零售	多业态零售
417	2012	合肥百货	BB	5	76.52	C	51.65	AA	90.23	BBB	82.65	零售业	百货零售	多业态零售
417	2013	合肥百货	BB	5	78.91	C	59.31	AAA	95.12	BBB	81.96	零售业	百货零售	多业态零售
417	2014	合肥百货	BB	5	76.69	C	59.31	A	85.35	BBB	81.27	零售业	百货零售	多业态零售
417	2015	合肥百货	BB	5	77.14	C	57.42	AA	90.23	BBB	81.27	零售业	百货零售	多业态零售
417	2016	合肥百货	BB	5	77.14	C	57.42	AA	90.23	BBB	81.27	零售业	百货零售	多业态零售
417	2017	合肥百货	BB	5	76.43	C	59.88	A	85.35	BBB	80.57	零售业	百货零售	多业态零售
417	2018	合肥百货	BB	5	77.43	C	57.99	AAA	100	BB	78.34	零售业	百货零售	多业态零售
417	2019	合肥百货	B	4	73.74	C	57.99	AA	90.23	BB	75.05	零售业	百货零售	多业态零售
417	2020	合肥百货	BB	5	75.22	C	57.99	AA	90.23	BB	77.66	零售业	百货零售	多业态零售
417	2021	合肥百货	BB	5	77.38	CCC	66.77	BB	78.91	BBB	81.39	零售业	百货零售	多业态零售
417	2022	合肥百货	BB	5	75.78	CCC	66.77	B	74.56	BBB	81.17	零售业	百货零售	多业态零售
417	2023	合肥百货	BB	5	76.06	CCC	66.77	BB	76.46	BBB	80.33	零售业	百货零售	多业态零售
417	2024	合百集团	B	4	72.41	CCC	66.15	BB	79.71	BBB	84.2	零售业	百货零售	多业态零售
419	2009	通程控股	BB	5	78.19	C	59.31	AAA	100	BB	79.11	零售业	百货零售	多业态零售
419	2010	通程控股	BBB	6	80.13	C	57.33	AAA	100	BBB	83.36	零售业	百货零售	多业态零售
419	2011	通程控股	BB	5	77.78	C	47.67	AAA	100	BBB	83.36	零售业	百货零售	多业态零售
419	2012	通程控股	CC	2	62.27	C	47.67	BBB	80.46	CC	62.54	零售业	百货零售	多业态零售
419	2013	通程控股	B	4	72.11	CC	61.21	AA	90.23	B	70.83	零售业	百货零售	多业态零售
419	2014	通程控股	CCC	3	65.95	C	59.31	BB	75.58	CCC	65.63	零售业	百货零售	多业态零售
419	2015	通程控股	BB	5	75.31	C	55.43	A	85.35	BBB	80.51	零售业	百货零售	多业态零售
419	2016	通程控股	B	4	73.19	C	51.65	A	85.35	BB	78.41	零售业	百货零售	多业态零售
419	2017	通程控股	BB	5	75.83	C	52.21	AA	90.23	BBB	81.2	零售业	百货零售	多业态零售
419	2018	通程控股	B	4	74.29	C	56.09	BBB	80.46	BBB	80.05	零售业	百货零售	多业态零售
419	2019	通程控股	BB	5	77.48	B	72.92	BB	75.58	BBB	80.05	零售业	百货零售	多业态零售
419	2020	通程控股	BB	5	78.39	B	72.92	BBB	80.46	BBB	80.05	零售业	百货零售	多业态零售
419	2021	通程控股	BB	5	76.08	CCC	68.09	BB	78.34	BB	78.21	零售业	百货零售	多业态零售
419	2022	通程控股	BB	5	75.99	CCC	68.35	BB	77.26	BB	78.74	零售业	百货零售	多业态零售
419	2023	通程控股	BB	5	78.71	CCC	68.71	BB	79.8	BBB	82.76	零售业	百货零售	多业态零售
419	2024	通程控股	CCC	3	69.1	CCC	67.21	BB	79.8	BBB	80.53	零售业	百货零售	多业态零售
420	2009	吉林化纤	B	4	73.42	CC	64.89	CCC	69.46	BBB	80.44	化学纤维制造业	粘胶	粘胶
420	2010	吉林化纤	B	4	70.93	C	57.45	CCC	66.47	BBB	80.82	化学纤维制造业	粘胶	粘胶
420	2011	吉林化纤	CCC	3	68.92	C	55.66	CCC	69.69	BB	75.17	化学纤维制造业	粘胶	粘胶
420	2012	吉林化纤	CCC	3	67.81	C	52.29	CC	63.26	BB	78.8	化学纤维制造业	粘胶	粘胶
420	2013	吉林化纤	B	4	70.75	C	57.67	CC	62.77	BBB	82.82	化学纤维制造业	粘胶	粘胶
420	2014	吉林化纤	B	4	72.22	C	57.45	B	72.17	BB	79.8	化学纤维制造业	粘胶	粘胶
420	2015	吉林化纤	CCC	3	67.84	C	54.08	CC	60.78	BB	79.62	化学纤维制造业	粘胶	粘胶
420	2016	吉林化纤	CCC	3	67.42	C	52.29	CC	60.1	BBB	80.08	化学纤维制造业	粘胶	粘胶
420	2017	吉林化纤	CCC	3	68.56	C	50.31	CC	62.45	BBB	82	化学纤维制造业	粘胶	粘胶
420	2018	吉林化纤	CCC	3	69.72	C	50.31	CCC	68.24	BBB	80.63	化学纤维制造业	粘胶	粘胶
420	2019	吉林化纤	B	4	71.4	C	50.31	B	73.4	BBB	80.81	化学纤维制造业	粘胶	粘胶
420	2020	吉林化纤	CCC	3	67.87	C	50.18	CC	64.78	BB	78.99	化学纤维制造业	粘胶	粘胶
420	2021	吉林化纤	CCC	3	66.73	CC	60.96	CCC	68.65	B	72.16	化学纤维制造业	粘胶	粘胶
420	2022	吉林化纤	CCC	3	68.58	CC	62.75	CCC	68.65	BB	75.34	化学纤维制造业	粘胶	粘胶
420	2023	吉林化纤	CCC	3	68.87	CC	62.28	B	71.75	B	74.59	化学纤维制造业	粘胶	粘胶
420	2024	吉林化纤	C	1	59.96	CC	60.49	B	74.82	B	72.15	化学纤维制造业	粘胶	粘胶
421	2009	南京公用	B	4	71.54	C	47.08	B	70.18	BBB	84.02	燃气生产和供应业	燃气Ⅲ	综合Ⅲ
421	2010	南京公用	C	1	57.69	C	43.79	CC	60.36	CC	62.75	燃气生产和供应业	燃气Ⅲ	综合Ⅲ
421	2011	南京公用	CCC	3	66.81	C	45.15	BB	77.12	B	71.05	燃气生产和供应业	燃气Ⅲ	综合Ⅲ
421	2012	南京公用	CCC	3	67.53	C	43.79	B	70.18	BB	77.29	燃气生产和供应业	燃气Ⅲ	综合Ⅲ
421	2013	南京公用	CCC	3	67.22	C	45.72	CC	61.53	BBB	80.86	燃气生产和供应业	燃气Ⅲ	综合Ⅲ
421	2014	南京公用	B	4	70.89	C	42.42	B	70.18	BBB	84.92	燃气生产和供应业	燃气Ⅲ	综合Ⅲ
421	2015	南京公用	CCC	3	67.76	C	45.72	C	59.14	BBB	83.4	燃气生产和供应业	燃气Ⅲ	综合Ⅲ
421	2016	南京公用	B	4	72.21	C	45.72	BB	75.95	BBB	82.65	燃气生产和供应业	燃气Ⅲ	综合Ⅲ
421	2017	南京公用	CCC	3	68.02	C	44.56	CCC	65.03	BBB	81	燃气生产和供应业	燃气Ⅲ	综合Ⅲ
421	2018	南京公用	CCC	3	66.81	C	43.2	CC	63.8	BB	79.87	燃气生产和供应业	燃气Ⅲ	综合Ⅲ
421	2019	南京公用	CCC	3	65.87	C	44.56	CC	60.92	BB	78.98	燃气生产和供应业	燃气Ⅲ	综合Ⅲ
421	2020	南京公用	CCC	3	69.26	C	47.29	CCC	67.79	BBB	80.63	燃气生产和供应业	燃气Ⅲ	综合Ⅲ
421	2021	南京公用	B	4	71.71	CC	63.14	B	73.5	BB	79.34	燃气生产和供应业	燃气Ⅲ	综合Ⅲ
421	2022	南京公用	B	4	70.92	CC	62.5	B	73.92	BB	77.76	燃气生产和供应业	燃气Ⅲ	综合Ⅲ
421	2023	南京公用	B	4	72.98	CC	63.41	B	74.77	BBB	81.59	燃气生产和供应业	燃气Ⅲ	综合Ⅲ
421	2024	南京公用	C	1	50	CC	60.78	BB	75.61	CCC	67.93	燃气生产和供应业	燃气Ⅲ	综合Ⅲ
422	2009	湖北宜化	BB	5	75.97	CCC	65.02	B	70.84	A	85.02	化学原料和化学制品制造业	磷肥及磷化工	氮肥
422	2010	湖北宜化	CCC	3	66.74	CC	63.23	C	39.87	A	86.65	化学原料和化学制品制造业	磷肥及磷化工	氮肥
422	2011	湖北宜化	B	4	72.03	CCC	65.02	C	56.41	A	86.14	化学原料和化学制品制造业	磷肥及磷化工	氮肥
422	2012	湖北宜化	B	4	71.25	B	72.08	C	47.08	A	87.13	化学原料和化学制品制造业	磷肥及磷化工	氮肥
422	2013	湖北宜化	B	4	73.02	B	72.08	C	53.06	A	86.96	化学原料和化学制品制造业	磷肥及磷化工	氮肥
422	2014	湖北宜化	B	4	70.29	B	72.08	C	44.23	A	86.96	化学原料和化学制品制造业	磷肥及磷化工	氮肥
422	2015	湖北宜化	CC	2	60.17	C	50.44	C	50.98	B	71.33	化学原料和化学制品制造业	磷肥及磷化工	氮肥
422	2016	湖北宜化	CCC	3	67.23	C	54.21	CC	63.69	BB	76.25	化学原料和化学制品制造业	磷肥及磷化工	氮肥
422	2017	湖北宜化	C	1	55.21	CC	61.84	C	43.41	C	59.79	化学原料和化学制品制造业	磷肥及磷化工	氮肥
422	2018	湖北宜化	CCC	3	67.2	CCC	65.4	B	72.04	CC	64.86	化学原料和化学制品制造业	磷肥及磷化工	氮肥
422	2019	湖北宜化	C	1	58.48	C	55.85	CCC	67.93	C	53.45	化学原料和化学制品制造业	磷肥及磷化工	氮肥
422	2020	湖北宜化	CCC	3	68.9	CC	61.96	BB	77.08	CCC	66.92	化学原料和化学制品制造业	磷肥及磷化工	氮肥
422	2021	湖北宜化	CCC	3	67.17	CC	61.2	B	73.94	CCC	69.56	化学原料和化学制品制造业	磷肥及磷化工	氮肥
422	2022	湖北宜化	B	4	70.53	CC	61.2	BB	75.55	BB	78	化学原料和化学制品制造业	磷肥及磷化工	氮肥
422	2023	湖北宜化	CCC	3	69.26	CC	60.66	BB	75.33	BB	75.18	化学原料和化学制品制造业	磷肥及磷化工	氮肥
422	2024	湖北宜化	B	4	70.16	CC	64.22	A	85.6	BB	76.74	化学原料和化学制品制造业	磷肥及磷化工	氮肥
423	2009	东阿阿胶	BB	5	78.41	CC	60.84	BB	78.54	A	87.29	医药制造业	中药Ⅲ	中药Ⅲ
423	2010	东阿阿胶	BB	5	76.3	C	50.66	BBB	81.46	A	85.91	医药制造业	中药Ⅲ	中药Ⅲ
423	2011	东阿阿胶	BBB	6	81.89	CCC	67.08	A	85.08	A	87.29	医药制造业	中药Ⅲ	中药Ⅲ
423	2012	东阿阿胶	BBB	6	80.28	CCC	65.28	BBB	81.24	A	87.29	医药制造业	中药Ⅲ	中药Ⅲ
423	2013	东阿阿胶	BBB	6	80.62	CC	62.13	BBB	83.59	A	88.06	医药制造业	中药Ⅲ	中药Ⅲ
423	2014	东阿阿胶	BB	5	78.12	CCC	67.08	BB	77.31	BBB	84.3	医药制造业	中药Ⅲ	中药Ⅲ
423	2015	东阿阿胶	BB	5	75.97	CC	63.71	B	74.1	BBB	83.48	医药制造业	中药Ⅲ	中药Ⅲ
423	2016	东阿阿胶	BB	5	78.57	CC	63.71	BBB	84.96	BBB	81.84	医药制造业	中药Ⅲ	中药Ⅲ
423	2017	东阿阿胶	BB	5	75.32	C	59.71	BB	79.87	BBB	80.21	医药制造业	中药Ⅲ	中药Ⅲ
423	2018	东阿阿胶	BBB	6	80.56	C	59.71	AA	94.44	BBB	81.83	医药制造业	中药Ⅲ	中药Ⅲ
423	2019	东阿阿胶	BB	5	78.98	CC	61.29	A	87.88	BBB	82.01	医药制造业	中药Ⅲ	中药Ⅲ
423	2020	东阿阿胶	BB	5	75.84	CC	62.74	A	86.03	BB	75.65	医药制造业	中药Ⅲ	中药Ⅲ
423	2021	东阿阿胶	BB	5	76.99	CC	62.81	BB	79.86	BBB	81.27	医药制造业	中药Ⅲ	中药Ⅲ
423	2022	东阿阿胶	BB	5	77.54	CC	61.63	BBB	82.59	BBB	80.89	医药制造业	中药Ⅲ	中药Ⅲ
423	2023	东阿阿胶	BBB	6	84.29	BBB	80.31	A	87.55	BBB	83.54	医药制造业	中药Ⅲ	中药Ⅲ
423	2024	东阿阿胶	AA	8	91.72	BB	77.48	AA	90.85	BBB	84.68	医药制造业	中药Ⅲ	中药Ⅲ
425	2009	徐工机械	BB	5	75.91	B	70.61	CCC	69.12	BBB	83.2	专用设备制造业	工程机械	工程机械整机
425	2010	徐工机械	BB	5	76.5	B	70.61	B	71.01	BBB	83.2	专用设备制造业	工程机械	工程机械整机
425	2011	徐工机械	BB	5	76.35	CCC	67.79	B	72.66	BBB	83.2	专用设备制造业	工程机械	工程机械整机
425	2012	徐工机械	BB	5	75.94	CCC	67.79	CCC	69.85	BBB	84.2	专用设备制造业	工程机械	工程机械整机
425	2013	徐工机械	B	4	70.89	CC	62.63	C	58.9	BBB	83.2	专用设备制造业	工程机械	工程机械整机
425	2014	徐工机械	CCC	3	69.35	C	54.03	CC	62.45	BBB	81.82	专用设备制造业	工程机械	工程机械整机
425	2015	徐工机械	B	4	72.58	C	56.43	CCC	67.58	BBB	84.2	专用设备制造业	工程机械	工程机械整机
425	2016	徐工机械	B	4	71.48	CC	62.29	CCC	65.23	BBB	80.38	专用设备制造业	工程机械	工程机械整机
425	2017	徐工机械	B	4	73.05	CC	60.62	CCC	68.36	BBB	82.56	专用设备制造业	工程机械	工程机械整机
425	2018	徐工机械	B	4	73.32	CC	61.9	CCC	67.04	BBB	83.38	专用设备制造业	工程机械	工程机械整机
425	2019	徐工机械	B	4	73.75	CC	61.14	B	70.75	BBB	82.2	专用设备制造业	工程机械	工程机械整机
425	2020	徐工机械	B	4	74.23	CCC	66.9	CCC	69.18	BBB	81.38	专用设备制造业	工程机械	工程机械整机
425	2021	徐工机械	BB	5	76.22	CC	64.97	BBB	82.93	BBB	80.74	专用设备制造业	工程机械	工程机械整机
425	2022	徐工机械	B	4	73.63	CC	60.33	BBB	82.24	BB	78.58	专用设备制造业	工程机械	工程机械整机
425	2023	徐工机械	B	4	74.27	CC	61.72	BBB	84.31	BB	77.71	专用设备制造业	工程机械	工程机械整机
425	2024	徐工机械	A	7	85.86	BB	79.1	A	88.57	BBB	80.04	专用设备制造业	工程机械Ⅲ	工程机械整机
426	2009	兴业银锡	B	4	71.26	C	49.82	B	74.39	BB	79.26	有色金属矿采选业	铅锌	铅锌
426	2010	兴业银锡	B	4	72.56	C	49.91	B	72.97	BBB	83.16	有色金属矿采选业	铅锌	铅锌
426	2011	兴业银锡	CCC	3	67.66	C	48.7	CCC	69.41	BB	75.5	有色金属矿采选业	铅锌	铅锌
426	2012	兴业银锡	C	1	47.26	C	51.24	C	15.36	CCC	69.03	有色金属矿采选业	铅锌	铅锌
426	2013	兴业银锡	C	1	50.19	C	52.38	C	18.44	B	72.71	有色金属矿采选业	铅锌	铅锌
426	2014	兴业银锡	C	1	49.95	C	51.15	C	13	BB	76.81	有色金属矿采选业	铅锌	铅锌
426	2015	兴业银锡	C	1	58.34	C	47.36	C	39.12	BB	77.9	有色金属矿采选业	铅锌	铅锌
426	2016	兴业银锡	C	1	43.99	C	47.36	C	14.9	CC	63.97	有色金属矿采选业	铅锌	铅锌
426	2017	兴业银锡	C	1	57.32	C	46.12	C	43.62	B	72.88	有色金属矿采选业	铅锌	铅锌
426	2018	兴业银锡	C	1	55.53	C	31.08	CC	60.58	CC	63.55	有色金属矿采选业	铅锌	铅锌
426	2019	兴业银锡	C	1	41.19	C	42.02	C	29.9	C	49.17	有色金属矿采选业	铅锌	铅锌
426	2020	兴业银锡	C	1	49.38	C	49.65	C	46.8	C	51.17	有色金属矿采选业	铅锌	铅锌
426	2021	兴业银锡	CC	2	62.41	C	59.42	CCC	65.53	CC	63.83	有色金属矿采选业	铅锌	铅锌
426	2022	兴业银锡	CC	2	62.84	C	59.42	CC	64.9	CCC	65.61	有色金属矿采选业	铅锌	铅锌
426	2023	兴业银锡	CCC	3	66.42	C	59.42	BB	77.3	CCC	67.05	有色金属矿采选业	铅锌	铅锌
426	2024	兴业银锡	B	4	72.06	B	73.51	CCC	69.21	BB	78.15	有色金属矿采选业	其他小金属	铅锌
428	2009	华天酒店	CCC	3	69.83	C	43.71	BBB	83.65	B	74.84	住宿业	酒店	酒店
428	2010	华天酒店	B	4	73.59	C	48.03	AAA	100	B	74.84	住宿业	酒店	酒店
428	2011	华天酒店	BB	5	75.39	C	45.69	AAA	100	BB	78.58	住宿业	酒店	酒店
428	2012	华天酒店	BB	5	75.87	C	45.87	AAA	100	BB	79.29	住宿业	酒店	酒店
428	2013	华天酒店	B	4	73.02	C	45.87	BBB	83.65	BB	79.29	住宿业	酒店	酒店
428	2014	华天酒店	CCC	3	67.59	C	45.87	B	72.75	B	73.55	住宿业	酒店	酒店
428	2015	华天酒店	CCC	3	67.2	C	48.03	B	72.75	B	72.18	住宿业	酒店	酒店
428	2016	华天酒店	CCC	3	69.17	C	43.71	B	72.75	BB	76.85	住宿业	酒店	酒店
428	2017	华天酒店	B	4	73.26	C	44.29	A	89.1	BB	78.67	住宿业	酒店	酒店
428	2018	华天酒店	B	4	71.98	C	44.29	BBB	83.65	BB	78.13	住宿业	酒店	酒店
428	2019	华天酒店	B	4	70.95	C	44.29	BB	78.2	BB	78	住宿业	酒店	酒店
428	2020	华天酒店	B	4	73.51	C	48.48	BB	78.2	BBB	80.73	住宿业	酒店	酒店
428	2021	华天酒店	CCC	3	67.53	C	58.06	B	70.73	CCC	69.96	住宿业	酒店	酒店
428	2022	华天酒店	CCC	3	67.5	C	58.06	B	70.97	CCC	69.72	住宿业	酒店	酒店
428	2023	华天酒店	CCC	3	68.06	C	58.06	B	71.69	B	70.44	住宿业	酒店	酒店
428	2024	华天酒店	C	1	56.31	C	58.06	B	71.69	B	72.25	住宿业	酒店	酒店
429	2009	粤高速A	B	4	72.39	CC	62.26	C	59.63	BBB	83.7	道路运输业	高速公路	高速公路
429	2010	粤高速A	CCC	3	69.17	CC	60.54	C	47.22	BBB	83.7	道路运输业	高速公路	高速公路
429	2011	粤高速A	B	4	70.67	CC	62.26	C	55.1	BBB	82.27	道路运输业	高速公路	高速公路
429	2012	粤高速A	CCC	3	69.95	CC	62.26	C	55.1	BBB	80.83	道路运输业	高速公路	高速公路
429	2013	粤高速A	B	4	71.94	CC	62.26	CC	60.82	BBB	82.27	道路运输业	高速公路	高速公路
429	2014	粤高速A	CCC	3	69.41	CC	63.98	C	47.22	BBB	82.27	道路运输业	高速公路	高速公路
429	2015	粤高速A	CCC	3	68.65	CC	62.26	C	42.68	BBB	83.7	道路运输业	高速公路	高速公路
429	2016	粤高速A	CCC	3	66.35	CC	60.54	C	39.34	BBB	81.55	道路运输业	高速公路	高速公路
429	2017	粤高速A	B	4	72.01	CC	63.87	C	57.48	BBB	82.99	道路运输业	高速公路	高速公路
429	2018	粤高速A	CCC	3	66.24	CC	60.43	C	43.87	BB	79.37	道路运输业	高速公路	高速公路
429	2019	粤高速A	CCC	3	67.6	CC	60.43	C	48.41	BBB	80.09	道路运输业	高速公路	高速公路
429	2020	粤高速A	CCC	3	69.73	CC	62.15	C	43.87	A	85.4	道路运输业	高速公路	高速公路
429	2021	粤高速A	B	4	72.72	C	59.14	B	73.62	BBB	81.3	道路运输业	高速公路	高速公路
429	2022	粤高速A	B	4	72.87	C	59.14	BB	77.05	BB	79.13	道路运输业	高速公路	高速公路
429	2023	粤高速A	B	4	74.41	CC	62.12	B	73.73	BBB	83.27	道路运输业	高速公路	高速公路
429	2024	粤高速A	BB	5	78.22	CCC	69.3	BB	78.9	A	87.02	道路运输业	高速公路	高速公路
430	2009	张家界	B	4	70.03	C	52.51	B	70.16	BB	77.17	公共设施管理业	自然景点	自然景区
430	2010	张家界	CCC	3	67.41	C	51.99	CC	63.01	BB	77.17	公共设施管理业	自然景点	自然景区
430	2011	张家界	CCC	3	67.27	C	50.28	C	59.91	BB	79.95	公共设施管理业	自然景点	自然景区
430	2012	张家界	B	4	73.84	C	51.47	BB	77.62	BBB	80.16	公共设施管理业	自然景点	自然景区
430	2013	张家界	B	4	72.61	C	50.31	BB	76.07	BB	79.14	公共设施管理业	自然景点	自然景区
430	2014	张家界	BB	5	75.16	C	49.27	BB	77.62	BBB	83.95	公共设施管理业	自然景点	自然景区
430	2015	张家界	BB	5	75.63	C	49.79	BB	77.62	BBB	84.76	公共设施管理业	自然景点	自然景区
430	2016	张家界	B	4	72.15	C	49.79	B	74.52	BB	79.55	公共设施管理业	自然景点	自然景区
430	2017	张家界	BB	5	75.38	C	48.71	BBB	83.22	BBB	80.36	公共设施管理业	自然景点	自然景区
430	2018	张家界	B	4	74	C	47.55	BB	77.01	BBB	82.6	公共设施管理业	自然景点	自然景区
430	2019	张家界	B	4	70.43	C	47.55	BB	78.56	B	73.62	公共设施管理业	自然景点	自然景区
430	2020	张家界	B	4	72.86	C	47.55	BB	78.56	BB	78.92	公共设施管理业	自然景点	自然景区
430	2021	张家界	B	4	70.23	C	58.06	B	73.51	B	73.94	公共设施管理业	自然景点	自然景区
430	2022	张家界	CCC	3	69.63	C	58.06	B	72.97	B	73.01	公共设施管理业	自然景点	自然景区
430	2023	张家界	B	4	70.31	C	58.06	B	72.31	B	75	公共设施管理业	自然景点	自然景区
430	2024	ST张家界	C	1	58.79	C	58.06	B	72.3	B	74.46	公共设施管理业	自然景点	自然景区
488	2009	晨鸣纸业	BB	5	76.3	CC	60.98	B	74.03	A	85.66	造纸和纸制品业	造纸Ⅲ	大宗用纸
488	2010	晨鸣纸业	B	4	71.51	CC	60.98	CC	60.55	BBB	84.28	造纸和纸制品业	造纸Ⅲ	大宗用纸
488	2011	晨鸣纸业	BB	5	76.53	B	70.61	B	71.12	BBB	83.2	造纸和纸制品业	造纸Ⅲ	大宗用纸
488	2012	晨鸣纸业	CCC	3	69.04	C	55.82	CC	60.1	BBB	81.82	造纸和纸制品业	造纸Ⅲ	大宗用纸
488	2013	晨鸣纸业	CCC	3	67.68	CC	63.8	C	54.39	BB	78.62	造纸和纸制品业	造纸Ⅲ	大宗用纸
488	2014	晨鸣纸业	B	4	71.6	CC	63.8	C	59.92	BBB	83.46	造纸和纸制品业	造纸Ⅲ	大宗用纸
488	2015	晨鸣纸业	B	4	71.95	CCC	66.63	CC	63.77	BBB	80.18	造纸和纸制品业	造纸Ⅲ	大宗用纸
488	2016	晨鸣纸业	B	4	71.76	CCC	66.63	CC	61.41	BBB	81.36	造纸和纸制品业	造纸Ⅲ	大宗用纸
488	2017	晨鸣纸业	B	4	73.13	C	59.98	CCC	68.47	BBB	82.99	造纸和纸制品业	造纸Ⅲ	大宗用纸
488	2018	晨鸣纸业	CCC	3	68.99	C	48.29	CCC	68.6	BB	79.81	造纸和纸制品业	造纸Ⅲ	大宗用纸
488	2019	晨鸣纸业	CCC	3	65.26	C	48.29	BB	75.03	CCC	67.33	造纸和纸制品业	造纸Ⅲ	大宗用纸
488	2020	晨鸣纸业	B	4	70.44	CCC	66.75	CCC	68.11	B	73.89	造纸和纸制品业	造纸Ⅲ	大宗用纸
488	2021	晨鸣纸业	BB	5	79.31	BB	76.22	A	88.98	BB	76.58	造纸和纸制品业	造纸Ⅲ	大宗用纸
488	2022	晨鸣纸业	BBB	6	81.75	BB	75.6	AA	93.98	BBB	81.04	造纸和纸制品业	造纸Ⅲ	大宗用纸
488	2023	晨鸣纸业	BB	5	77.1	BB	78.94	B	70.16	BB	79.54	造纸和纸制品业	造纸Ⅲ	大宗用纸
488	2024	ST晨鸣	BB	5	76.78	BBB	80.74	BB	78.46	BB	78.96	造纸和纸制品业	造纸Ⅲ	大宗用纸
498	2009	山东路桥	CC	2	62.81	C	53.99	C	55.1	B	72.39	土木工程建筑业	基础建设	基建市政工程
498	2010	山东路桥	C	1	55.2	C	48.15	C	53.59	C	59.77	土木工程建筑业	基础建设	基建市政工程
498	2011	山东路桥	C	1	55.21	C	47.68	C	49.17	CC	63.01	土木工程建筑业	基础建设	基建市政工程
498	2012	山东路桥	C	1	58.39	C	47.68	C	52.08	CCC	67.96	土木工程建筑业	基础建设	基建市政工程
498	2013	山东路桥	CC	2	60.99	CC	60.72	C	42.59	B	73.58	土木工程建筑业	基础建设	基建市政工程
498	2014	山东路桥	CCC	3	65.66	C	57.92	C	55.11	BB	76.63	土木工程建筑业	基础建设	基建市政工程
498	2015	山东路桥	CCC	3	67.47	C	54.89	CCC	65.74	B	74.86	土木工程建筑业	基础建设	基建市政工程
498	2016	山东路桥	CCC	3	67.05	C	54.89	CCC	67.58	B	72.7	土木工程建筑业	基础建设	基建市政工程
498	2017	山东路桥	B	4	71.23	CCC	65.22	B	73.46	B	72.7	土木工程建筑业	基础建设	基建市政工程
498	2018	山东路桥	B	4	73.83	CCC	68.26	BB	77.57	B	74.04	土木工程建筑业	基础建设	基建市政工程
498	2019	山东路桥	B	4	71.87	CC	63.69	B	72.61	BB	75.41	土木工程建筑业	基础建设	基建市政工程
498	2020	山东路桥	B	4	72.96	CC	61.32	BB	77.51	BB	75.63	土木工程建筑业	基础建设	基建市政工程
498	2021	山东路桥	CCC	3	68.37	CC	64.79	CCC	66.53	B	72.61	土木工程建筑业	基础建设	基建市政工程
498	2022	山东路桥	CCC	3	69.16	CC	62.97	CCC	66.53	BB	76.11	土木工程建筑业	基础建设	基建市政工程
498	2023	山东路桥	B	4	73.94	CC	63.59	BB	79.28	BB	78.69	土木工程建筑业	基础建设	基建市政工程
498	2024	山东路桥	CCC	3	66.63	CC	61.42	BB	77.61	BB	77.62	土木工程建筑业	基础建设	基建市政工程
501	2009	武商集团	BB	5	75.71	C	45.69	AAA	100	BBB	80.57	零售业	百货零售	百货
501	2010	武商集团	B	4	73.44	C	51.37	BBB	80.46	BBB	80.57	零售业	百货零售	百货
501	2011	武商集团	BB	5	77.1	C	51.37	AAA	100	BBB	80.57	零售业	百货零售	百货
501	2012	武商集团	BB	5	77.32	C	55.34	AAA	100	BB	79.27	零售业	百货零售	百货
501	2013	武商集团	BB	5	77.45	C	57.23	A	85.35	BBB	83.51	零售业	百货零售	百货
501	2014	武商集团	BB	5	77.09	C	55.43	AA	90.23	BBB	82.04	零售业	百货零售	百货
501	2015	武商集团	B	4	74.38	C	51.46	A	85.35	BBB	80.57	零售业	百货零售	百货
501	2016	武商集团	B	4	73.41	C	51.55	BB	75.58	BBB	82.04	零售业	百货零售	百货
501	2017	武商集团	B	4	71.77	C	48.24	BB	75.58	BBB	80.57	零售业	百货零售	百货
501	2018	武商集团	B	4	72.63	C	50.23	A	85.35	BB	78.03	零售业	百货零售	百货
501	2019	武商集团	CC	2	64.6	C	46.26	BB	75.58	CCC	68.84	零售业	百货零售	百货
501	2020	武商集团	B	4	70.49	C	46.26	AA	90.23	B	74.36	零售业	百货零售	百货
501	2021	武商集团	BB	5	75.39	CCC	67.38	BB	75.84	BB	78.97	零售业	百货零售	百货
501	2022	武商集团	B	4	74.3	CCC	67.38	BB	75.56	BB	76.71	零售业	百货零售	百货
501	2023	武商集团	BB	5	75.26	CCC	67.38	B	73.74	BBB	80.35	零售业	百货零售	百货
501	2024	武商集团	CC	2	62.48	CCC	65.53	B	74.1	BB	79.71	零售业	百货零售	百货
503	2009	国新健康	B	4	74.02	CC	61.27	CCC	65.4	BBB	84.32	互联网和相关服务	软件开发	垂直应用软件
503	2010	国新健康	B	4	71.83	C	58.86	C	58.55	BBB	84.32	互联网和相关服务	软件开发	垂直应用软件
503	2011	国新健康	B	4	72.81	C	54.68	CCC	67.62	BBB	84.32	互联网和相关服务	软件开发	垂直应用软件
503	2012	国新健康	B	4	73.33	C	59.37	CC	64.55	BBB	84.32	互联网和相关服务	软件开发	垂直应用软件
503	2013	国新健康	CC	2	61.48	C	51.13	BB	76.91	C	59.86	互联网和相关服务	软件开发	垂直应用软件
503	2014	国新健康	CCC	3	65.96	C	57.47	B	72.27	CCC	67.45	互联网和相关服务	软件开发	垂直应用软件
503	2015	国新健康	B	4	72.92	C	58.67	B	73.9	BB	79.72	互联网和相关服务	软件开发	垂直应用软件
503	2016	国新健康	BB	5	76.22	C	57.02	BB	79.89	BBB	84.32	互联网和相关服务	软件开发	垂直应用软件
503	2017	国新健康	BB	5	79.02	CCC	66.12	BB	78.54	A	85.79	互联网和相关服务	软件开发	垂直应用软件
503	2018	国新健康	B	4	72.05	CC	60.1	CCC	66.26	BBB	80.7	互联网和相关服务	软件开发	垂直应用软件
503	2019	国新健康	B	4	71.52	CC	60.1	CCC	67.76	BB	78.98	互联网和相关服务	软件开发	垂直应用软件
503	2020	国新健康	B	4	70.98	CC	62.89	CCC	68.56	BB	76.17	互联网和相关服务	软件开发	垂直应用软件
503	2021	国新健康	B	4	74.97	C	56.14	B	73.51	BBB	81.84	互联网和相关服务	软件开发	垂直应用软件
503	2022	国新健康	B	4	74.16	C	56.14	CCC	69.84	BBB	83.08	互联网和相关服务	软件开发	垂直应用软件
503	2023	国新健康	BB	5	77.25	CCC	66.88	B	71.09	BBB	83.63	互联网和相关服务	软件开发	垂直应用软件
503	2024	国新健康	CCC	3	68.49	B	70.81	B	70.46	BBB	80.43	互联网和相关服务	垂直应用软件	垂直应用软件
504	2009	南华生物	CC	2	63.48	C	45.84	C	48.79	BBB	84.16	科技推广和应用服务业	其他医疗服务	其他医疗服务
504	2010	南华生物	CCC	3	67.27	C	52.32	CC	60.06	BBB	80.88	科技推广和应用服务业	其他医疗服务	其他医疗服务
504	2011	南华生物	CCC	3	67.94	C	56.08	C	54.42	BBB	84.57	科技推广和应用服务业	其他医疗服务	其他医疗服务
504	2012	南华生物	CCC	3	66.87	C	45.84	CC	62.88	BBB	81.41	科技推广和应用服务业	其他医疗服务	其他医疗服务
504	2013	南华生物	CC	2	64.97	C	52.32	C	54.42	BB	79.8	科技推广和应用服务业	其他医疗服务	其他医疗服务
504	2014	南华生物	CC	2	60.71	C	52.32	C	48.79	B	74.24	科技推广和应用服务业	其他医疗服务	其他医疗服务
504	2015	南华生物	C	1	49.33	C	50.16	C	48.79	C	49.29	科技推广和应用服务业	其他医疗服务	其他医疗服务
504	2016	南华生物	C	1	59.78	C	48	CC	62.88	CC	63.93	科技推广和应用服务业	其他医疗服务	其他医疗服务
504	2017	南华生物	CCC	3	69.54	CC	60.24	CCC	68.65	BB	75.33	科技推广和应用服务业	其他医疗服务	其他医疗服务
504	2018	南华生物	CCC	3	69.18	CC	60.24	B	70.95	B	72.77	科技推广和应用服务业	其他医疗服务	其他医疗服务
504	2019	南华生物	CCC	3	69.18	CC	60.24	B	70.95	B	72.77	科技推广和应用服务业	其他医疗服务	其他医疗服务
504	2020	南华生物	B	4	74.94	CC	60.24	BB	77.23	BBB	81.3	科技推广和应用服务业	其他医疗服务	其他医疗服务
504	2021	南华生物	B	4	72.94	CC	62.55	B	73.97	BB	76.49	科技推广和应用服务业	其他医疗服务	其他医疗服务
504	2022	南华生物	B	4	70.54	CC	62.55	B	73.33	B	71.7	科技推广和应用服务业	其他医疗服务	其他医疗服务
504	2023	南华生物	CCC	3	68.03	CC	62.55	CCC	66.03	B	71.9	科技推广和应用服务业	其他医疗服务	其他医疗服务
504	2024	*ST生物	CC	2	61.88	CC	61.41	B	72.02	BB	76.24	科技推广和应用服务业	其他医疗服务	其他医疗服务
505	2009	京粮控股	CCC	3	68.67	C	52.24	CCC	66.35	BB	78.62	农副食品加工业	粮油加工	粮油加工
505	2010	京粮控股	B	4	70.87	C	54.24	CC	64.8	BBB	83.46	农副食品加工业	粮油加工	粮油加工
505	2011	京粮控股	CCC	3	67.51	C	50.66	C	59.06	BBB	81.82	农副食品加工业	粮油加工	粮油加工
505	2012	京粮控股	CCC	3	69.86	C	54.24	CCC	68.7	BB	78.62	农副食品加工业	粮油加工	粮油加工
505	2013	京粮控股	CCC	3	68.8	C	54.24	CCC	66.48	BB	77.8	农副食品加工业	粮油加工	粮油加工
505	2014	京粮控股	CC	2	64.82	C	54.24	CCC	66.25	CCC	69.26	农副食品加工业	粮油加工	粮油加工
505	2015	京粮控股	CCC	3	65.8	C	54.24	CCC	67.28	B	70.71	农副食品加工业	粮油加工	粮油加工
505	2016	京粮控股	CCC	3	67.57	C	58.09	CCC	69.1	B	71.39	农副食品加工业	粮油加工	粮油加工
505	2017	京粮控股	CC	2	63	C	51.35	CCC	65.26	CCC	67.42	农副食品加工业	粮油加工	粮油加工
505	2018	京粮控股	CC	2	64.11	C	48.19	C	58.2	BB	76.22	农副食品加工业	粮油加工	粮油加工
505	2019	京粮控股	CCC	3	68.6	C	48.19	CCC	65.26	BBB	81.27	农副食品加工业	粮油加工	粮油加工
505	2020	京粮控股	CCC	3	67.87	C	48.19	CC	62.91	BBB	81.27	农副食品加工业	粮油加工	粮油加工
505	2021	京粮控股	CCC	3	69.61	C	58.52	B	73.76	BB	77.02	农副食品加工业	粮油加工	粮油加工
505	2022	京粮控股	CCC	3	69.78	C	58.52	B	72.73	BB	78.2	农副食品加工业	粮油加工	粮油加工
505	2023	京粮控股	B	4	73.27	CCC	65.66	B	73.76	BBB	80.01	农副食品加工业	粮油加工	粮油加工
505	2024	京粮控股	B	4	70.79	CC	63.26	B	74.48	BBB	81.96	农副食品加工业	粮油加工	粮油加工
506	2009	中润资源	B	4	74.67	C	47.36	BBB	80.03	BBB	83.86	有色金属矿采选业	贵金属Ⅲ	黄金
506	2010	中润资源	B	4	71.88	C	47.45	BB	78.63	BB	78.65	有色金属矿采选业	贵金属Ⅲ	黄金
506	2011	中润资源	CCC	3	69.46	C	48.77	B	71.53	BB	77.9	有色金属矿采选业	贵金属Ⅲ	黄金
506	2012	中润资源	B	4	71.88	C	47.45	BB	78.63	BB	78.65	有色金属矿采选业	贵金属Ⅲ	黄金
506	2013	中润资源	CCC	3	68.31	C	46.12	B	70.83	BB	77.14	有色金属矿采选业	贵金属Ⅲ	黄金
506	2014	中润资源	B	4	70.62	C	52.56	B	72.23	BB	78.13	有色金属矿采选业	贵金属Ⅲ	黄金
506	2015	中润资源	B	4	70.79	C	52.56	BB	79.33	B	73.25	有色金属矿采选业	贵金属Ⅲ	黄金
506	2016	中润资源	CCC	3	69.86	C	50	B	72.95	BB	77.14	有色金属矿采选业	贵金属Ⅲ	黄金
506	2017	中润资源	B	4	70.27	C	47.74	BBB	80.71	B	73.38	有色金属矿采选业	贵金属Ⅲ	黄金
506	2018	中润资源	CC	2	64.71	C	48.5	BB	77.91	CC	62.72	有色金属矿采选业	贵金属Ⅲ	黄金
506	2019	中润资源	CC	2	62.13	C	47.26	B	74.35	CC	60.22	有色金属矿采选业	贵金属Ⅲ	黄金
506	2020	中润资源	C	1	57.37	C	48.2	CCC	68.77	C	53.33	有色金属矿采选业	贵金属Ⅲ	黄金
506	2021	中润资源	CCC	3	65.79	C	59.42	BB	75.29	CCC	66.66	有色金属矿采选业	贵金属Ⅲ	黄金
506	2022	中润资源	CC	2	63.78	C	59.42	BB	75.57	CC	60.4	有色金属矿采选业	贵金属Ⅲ	黄金
506	2023	中润资源	CC	2	64.19	C	59.42	B	70.53	CCC	65.42	有色金属矿采选业	贵金属Ⅲ	黄金
506	2024	*ST中润	C	1	53.81	CC	60.91	B	70.52	CC	62.14	有色金属矿采选业	贵金属Ⅲ	黄金
507	2009	珠海港	CC	2	64.9	C	56.36	C	34.8	BBB	82.99	水上运输业	港口	风力发电
507	2010	珠海港	CC	2	60.16	C	56.36	C	42.68	B	70	水上运输业	港口	风力发电
507	2011	珠海港	CC	2	62.58	C	56.36	C	38.15	BB	76.85	水上运输业	港口	风力发电
507	2012	珠海港	CCC	3	69.03	C	56.36	CC	60.82	BB	79.75	水上运输业	港口	风力发电
507	2013	珠海港	B	4	70.76	C	56.36	CC	64.17	BBB	81.74	水上运输业	港口	风力发电
507	2014	珠海港	B	4	70.74	C	56.36	C	59.63	BBB	83.7	水上运输业	港口	风力发电
507	2015	珠海港	CCC	3	68.33	C	54.64	C	59.63	BB	79.85	水上运输业	港口	风力发电
507	2016	珠海港	CCC	3	68.95	C	54.64	CC	60.82	BBB	80.57	水上运输业	港口	风力发电
507	2017	珠海港	CCC	3	67.41	C	54.53	C	51.75	BBB	81.55	水上运输业	港口	风力发电
507	2018	珠海港	CCC	3	68.38	C	57.97	C	51.75	BBB	81.55	水上运输业	港口	风力发电
507	2019	珠海港	B	4	70.14	C	57.97	B	70.36	BB	76.85	水上运输业	港口	风力发电
507	2020	珠海港	CCC	3	65.12	C	57.97	C	41.49	BB	79.56	水上运输业	港口	风力发电
507	2021	珠海港	BB	5	78.8	B	73.72	BB	76.14	BBB	84.4	水上运输业	港口	风力发电
507	2022	珠海港	BBB	6	80.59	B	73.95	BBB	83.31	BBB	83.54	水上运输业	港口	风力发电
507	2023	珠海港	BBB	6	82.29	BB	76.94	BB	78.21	A	89.1	水上运输业	港口	风力发电
507	2024	珠海港	BBB	6	84.61	BB	75.63	BB	78.02	A	88.46	水上运输业	港口	风力发电
509	2009	华塑控股	B	4	70.54	C	59.4	CCC	66.98	BB	78.62	卫生	面板	面板
509	2010	华塑控股	CC	2	64.98	C	56.03	C	58.2	B	74.12	卫生	面板	面板
509	2011	华塑控股	CCC	3	65.17	C	51.08	C	55.39	BB	78.95	卫生	面板	面板
509	2012	华塑控股	CCC	3	67.67	C	54.24	CC	62.91	BB	77.75	卫生	面板	面板
509	2013	华塑控股	C	1	51.35	C	52.45	C	59.1	C	45.56	卫生	面板	面板
509	2014	华塑控股	C	1	52.62	C	54.24	C	57.74	C	48.34	卫生	面板	面板
509	2015	华塑控股	C	1	55.08	C	52.45	C	53.04	C	57.79	卫生	面板	面板
509	2016	华塑控股	CC	2	61.6	C	49.08	C	53.04	B	73.76	卫生	面板	面板
509	2017	华塑控股	CC	2	62.65	C	49.77	C	53.04	BB	75.7	卫生	面板	面板
509	2018	华塑控股	CC	2	62.88	C	48.19	CC	61.18	B	71.53	卫生	面板	面板
509	2019	华塑控股	C	1	48.93	C	48.19	C	55.39	C	44.95	卫生	面板	面板
509	2020	华塑控股	C	1	53.28	C	49.77	C	57.74	C	52.06	卫生	面板	面板
509	2021	华塑控股	CCC	3	65.59	C	58.3	CCC	67.85	B	70.02	卫生	面板	面板
509	2022	华塑控股	CCC	3	67.86	C	58.3	B	70.06	B	74.06	卫生	面板	面板
509	2023	华塑控股	B	4	70.04	CC	64.19	CCC	68.12	B	74.46	卫生	面板	面板
509	2024	华塑控股	C	1	58.38	CCC	65.17	CCC	69.6	B	70.11	卫生	面板	面板
510	2009	新金路	B	4	73.53	C	59.25	CCC	69.69	BBB	83.42	化学原料和化学制品制造业	氯碱	氯碱
510	2010	新金路	B	4	72.68	C	59.25	CC	60.91	A	87.47	化学原料和化学制品制造业	氯碱	氯碱
510	2011	新金路	B	4	73.64	C	59.25	CCC	66.47	A	85.83	化学原料和化学制品制造业	氯碱	氯碱
510	2012	新金路	B	4	73.29	CC	62.07	B	72.67	BB	79.44	化学原料和化学制品制造业	氯碱	氯碱
510	2013	新金路	B	4	70.19	C	54.3	CC	63.77	BBB	82.64	化学原料和化学制品制造业	氯碱	氯碱
510	2014	新金路	CCC	3	69.14	C	54.3	CC	63.63	BBB	80.44	化学原料和化学制品制造业	氯碱	氯碱
510	2015	新金路	B	4	70.18	C	52.51	CCC	68.33	BBB	80.44	化学原料和化学制品制造业	氯碱	氯碱
510	2016	新金路	C	1	59.64	C	55.88	C	28.38	BBB	82.64	化学原料和化学制品制造业	氯碱	氯碱
510	2017	新金路	C	1	49.6	C	55.68	C	48.7	C	47.11	化学原料和化学制品制造业	氯碱	氯碱
510	2018	新金路	CC	2	60.14	CC	60.09	CC	62.5	C	58.58	化学原料和化学制品制造业	氯碱	氯碱
510	2019	新金路	CCC	3	67.77	C	55.68	B	70.01	B	72.43	化学原料和化学制品制造业	氯碱	氯碱
510	2020	新金路	CCC	3	68.42	C	55.68	B	71.37	B	72.94	化学原料和化学制品制造业	氯碱	氯碱
510	2021	新金路	CCC	3	68.01	CC	62.32	CCC	65.98	BB	76.01	化学原料和化学制品制造业	氯碱	氯碱
510	2022	新金路	CCC	3	68.76	CC	61.78	CCC	65.92	BB	78.8	化学原料和化学制品制造业	氯碱	氯碱
510	2023	新金路	CCC	3	69.22	C	59.37	B	73.05	BB	78.1	化学原料和化学制品制造业	氯碱	氯碱
510	2024	新金路	C	1	58.99	C	59.37	B	72.39	B	73.48	化学原料和化学制品制造业	氯碱	氯碱
513	2009	丽珠集团	B	4	71.31	C	57.61	CCC	67.84	BBB	80.64	医药制造业	化学制剂	化学制剂
513	2010	丽珠集团	B	4	71.92	C	55.82	CCC	69.96	BBB	81.46	医药制造业	化学制剂	化学制剂
513	2011	丽珠集团	B	4	70.06	C	50.52	CCC	66.73	BBB	82.28	医药制造业	化学制剂	化学制剂
513	2012	丽珠集团	B	4	72.56	C	55.82	B	70.82	BBB	82.28	医药制造业	化学制剂	化学制剂
513	2013	丽珠集团	B	4	74.52	CC	63.04	CCC	68.47	BBB	84.45	医药制造业	化学制剂	化学制剂
513	2014	丽珠集团	B	4	74.42	CC	63.04	CCC	65.84	A	86.01	医药制造业	化学制剂	化学制剂
513	2015	丽珠集团	CCC	3	68.21	C	58.64	B	72.04	B	70.51	医药制造业	化学制剂	化学制剂
513	2016	丽珠集团	B	4	70.55	CC	61.47	CCC	68.96	BB	76.25	医药制造业	化学制剂	化学制剂
513	2017	丽珠集团	BB	5	75.05	C	59.34	B	74.11	BBB	83.7	医药制造业	化学制剂	化学制剂
513	2018	丽珠集团	CCC	3	67.44	CC	63.74	C	48.02	BBB	82.42	医药制造业	化学制剂	化学制剂
513	2019	丽珠集团	B	4	71.35	C	58.19	CC	64.9	BBB	82.42	医药制造业	化学制剂	化学制剂
513	2020	丽珠集团	BB	5	78.63	CCC	65.53	B	73.77	A	88.59	医药制造业	化学制剂	化学制剂
513	2021	丽珠集团	BBB	6	83.56	B	72.42	BBB	81.42	AA	90.43	医药制造业	化学制剂	化学制剂
513	2022	丽珠集团	BBB	6	84.07	BB	77.07	BBB	80.99	A	89.76	医药制造业	化学制剂	化学制剂
513	2023	丽珠集团	A	7	85.08	B	74.77	A	88.34	A	87.25	医药制造业	化学制剂	化学制剂
513	2024	丽珠集团	A	7	88.53	B	73.6	A	87.77	BBB	84.66	医药制造业	化学制剂	化学制剂
514	2009	渝开发	BB	5	77.3	C	53.09	B	73.04	A	89.3	房地产业	住宅开发	住宅开发
514	2010	渝开发	BB	5	78.67	C	54.67	B	74.71	AA	90.33	房地产业	住宅开发	住宅开发
514	2011	渝开发	BBB	6	82.45	C	54.67	BBB	84.74	A	89.44	房地产业	住宅开发	住宅开发
514	2012	渝开发	BB	5	76.38	C	53.09	A	86.66	B	74.33	房地产业	住宅开发	住宅开发
514	2013	渝开发	BB	5	75.23	C	51.51	BBB	83.32	BB	75.4	房地产业	住宅开发	住宅开发
514	2014	渝开发	BB	5	76.53	C	58.04	B	74.97	BBB	84.11	房地产业	住宅开发	住宅开发
514	2015	渝开发	BB	5	76	C	54.67	BB	77.97	BBB	81.17	房地产业	住宅开发	住宅开发
514	2016	渝开发	B	4	74.79	C	51.51	BBB	80.06	BB	77.47	房地产业	住宅开发	住宅开发
514	2017	渝开发	BB	5	76.58	C	53.99	BB	76.64	BBB	83.96	房地产业	住宅开发	住宅开发
514	2018	渝开发	B	4	74.93	C	55.79	B	74.55	BBB	81.59	房地产业	住宅开发	住宅开发
514	2019	渝开发	BB	5	75.86	C	57.59	BBB	80.06	BB	77.91	房地产业	住宅开发	住宅开发
514	2020	渝开发	BB	5	75.47	C	52.41	BB	77.97	BBB	80.7	房地产业	住宅开发	住宅开发
514	2021	渝开发	B	4	72.67	CCC	68.08	B	72.73	BB	76.24	房地产业	住宅开发	住宅开发
514	2022	渝开发	B	4	72.45	B	70.39	B	72.15	B	74.29	房地产业	住宅开发	住宅开发
514	2023	渝开发	B	4	73.69	CCC	69.74	B	73.41	BB	76.98	房地产业	住宅开发	住宅开发
514	2024	渝开发	CCC	3	69.13	B	70.11	B	74.75	BB	78.32	房地产业	住宅开发	住宅开发
516	2009	国际医学	B	4	70.31	C	54.21	CCC	65.23	BBB	84.41	卫生	其他医疗服务	医院
516	2010	国际医学	CCC	3	66.67	C	57.36	B	73.1	CCC	69.15	卫生	其他医疗服务	医院
516	2011	国际医学	CCC	3	69.43	C	52.9	BB	75.37	BB	77.13	卫生	其他医疗服务	医院
516	2012	国际医学	CCC	3	69.05	C	52.32	CCC	69.22	BBB	80.4	卫生	其他医疗服务	医院
516	2013	国际医学	CCC	3	65.4	C	52.88	C	54.33	BBB	80.68	卫生	其他医疗服务	医院
516	2014	国际医学	CCC	3	66.68	C	50.11	CC	64.95	BB	79.06	卫生	其他医疗服务	医院
516	2015	国际医学	CCC	3	68.68	C	52.36	CC	61.77	BBB	84.04	卫生	其他医疗服务	医院
516	2016	国际医学	B	4	70.33	C	56.06	CCC	65.23	BBB	83.2	卫生	其他医疗服务	医院
516	2017	国际医学	B	4	71.94	CC	63.71	CC	62.65	BBB	83.2	卫生	其他医疗服务	医院
516	2018	国际医学	CCC	3	68.8	C	52.24	CCC	65.23	BBB	82.3	卫生	其他医疗服务	医院
516	2019	国际医学	CCC	3	67.91	C	55.23	C	59.88	BBB	81.46	卫生	其他医疗服务	医院
516	2020	国际医学	CCC	3	66.41	C	48.79	CCC	68.94	BB	76.93	卫生	其他医疗服务	医院
516	2021	国际医学	B	4	72.59	C	54.89	B	73.97	BB	78.69	卫生	其他医疗服务	医院
516	2022	国际医学	CCC	3	68.64	C	54.89	B	72.94	B	70.89	卫生	其他医疗服务	医院
516	2023	国际医学	B	4	71.42	CC	62.09	B	74.61	B	72.74	卫生	其他医疗服务	医院
516	2024	国际医学	C	1	59.78	C	58.22	BB	78.87	BB	75.31	卫生	医院	医院
517	2009	荣安地产	B	4	70.29	C	56.69	B	70.54	B	74.55	房地产业	住宅开发	住宅开发
517	2010	荣安地产	B	4	74.79	C	51.51	BBB	80.98	BB	76.59	房地产业	住宅开发	住宅开发
517	2011	荣安地产	BB	5	75.57	C	51.51	BBB	84.74	B	74.81	房地产业	住宅开发	住宅开发
517	2012	荣安地产	B	4	74.79	C	51.51	BBB	84.74	B	73.03	房地产业	住宅开发	住宅开发
517	2013	荣安地产	B	4	72.65	CC	61.64	BB	75.13	B	73.92	房地产业	住宅开发	住宅开发
517	2014	荣安地产	BBB	6	81.12	CC	64.28	AA	91.79	BB	76.57	房地产业	住宅开发	住宅开发
517	2015	荣安地产	BBB	6	81.59	CC	64.28	AA	91.04	BB	78.35	房地产业	住宅开发	住宅开发
517	2016	荣安地产	BB	5	77.64	C	58.33	BBB	83.6	BB	78.35	房地产业	住宅开发	住宅开发
517	2017	荣安地产	BB	5	78.85	C	59.23	A	85.27	BB	79.24	房地产业	住宅开发	住宅开发
517	2018	荣安地产	BB	5	77.19	C	58.2	A	89.87	B	71.45	房地产业	住宅开发	住宅开发
517	2019	荣安地产	BB	5	77.47	C	56.75	A	87.61	B	74.71	房地产业	住宅开发	住宅开发
517	2020	荣安地产	BB	5	78.94	C	57.43	A	88.61	BB	76.87	房地产业	住宅开发	住宅开发
517	2021	荣安地产	B	4	72.96	CCC	67.8	BB	76.45	B	74.36	房地产业	住宅开发	住宅开发
517	2022	荣安地产	B	4	72.64	CCC	66.65	BB	75.89	B	74.89	房地产业	住宅开发	住宅开发
517	2023	荣安地产	BB	5	76.06	B	70.83	BB	79.29	BB	77.73	房地产业	住宅开发	住宅开发
517	2024	荣安地产	CCC	3	69.82	CCC	69.53	BB	78.76	BB	76.78	房地产业	住宅开发	住宅开发
518	2009	四环生物	CCC	3	66.86	C	47.5	CC	61.64	BBB	80.26	医药制造业	其他生物制品	其他生物制品
518	2010	四环生物	B	4	70.83	C	47.5	B	73.4	BBB	81	医药制造业	其他生物制品	其他生物制品
518	2011	四环生物	CCC	3	69.8	C	47.5	CC	64	A	85.09	医药制造业	其他生物制品	其他生物制品
518	2012	四环生物	B	4	70.02	C	51.08	CCC	66.35	BBB	82.17	医药制造业	其他生物制品	其他生物制品
518	2013	四环生物	B	4	73.76	C	56.03	B	73.4	BBB	83.05	医药制造业	其他生物制品	其他生物制品
518	2014	四环生物	CCC	3	68.4	C	57.61	CC	64	BB	76.89	医药制造业	其他生物制品	其他生物制品
518	2015	四环生物	B	4	71.17	C	52.66	CC	64	A	85.45	医药制造业	其他生物制品	其他生物制品
518	2016	四环生物	CCC	3	69.21	C	50.87	B	73.4	BB	75.76	医药制造业	其他生物制品	其他生物制品
518	2017	四环生物	CC	2	64.74	C	48.19	CCC	67.7	B	71.2	医药制造业	其他生物制品	其他生物制品
518	2018	四环生物	CCC	3	66.97	C	48.19	CC	61.64	BBB	80.14	医药制造业	其他生物制品	其他生物制品
518	2019	四环生物	CC	2	62.41	C	48.19	B	73.4	CC	62.25	医药制造业	其他生物制品	其他生物制品
518	2020	四环生物	CC	2	61.7	C	48.19	B	71.05	CC	62.29	医药制造业	其他生物制品	其他生物制品
518	2021	四环生物	CCC	3	67.74	C	56.41	B	70.54	B	70.75	医药制造业	其他生物制品	其他生物制品
518	2022	四环生物	CCC	3	69.21	C	56.41	B	72.08	B	72.84	医药制造业	其他生物制品	其他生物制品
518	2023	四环生物	CCC	3	68.88	C	56.41	B	70.99	B	72.98	医药制造业	其他生物制品	其他生物制品
518	2024	*ST四环	CC	2	61.02	C	56.41	B	72.28	CCC	68.95	医药制造业	其他生物制品	其他生物制品
519	2009	中兵红箭	CCC	3	68.22	C	59.4	C	57.74	BB	79.8	专用设备制造业	地面兵装	地面兵装Ⅲ
519	2010	中兵红箭	B	4	70.74	C	57.61	CC	60.1	BBB	84.63	专用设备制造业	地面兵装	地面兵装Ⅲ
519	2011	中兵红箭	CCC	3	67.39	C	51.08	C	55.39	BBB	83.81	专用设备制造业	地面兵装	地面兵装Ⅲ
519	2012	中兵红箭	CCC	3	66.66	C	51.08	C	57.74	BBB	80.62	专用设备制造业	地面兵装	地面兵装Ⅲ
519	2013	中兵红箭	B	4	70.14	C	55.82	C	57.74	A	85.81	专用设备制造业	地面兵装	地面兵装Ⅲ
519	2014	中兵红箭	B	4	74.1	CC	63.04	CCC	66.15	A	85.09	专用设备制造业	地面兵装	地面兵装Ⅲ
519	2015	中兵红箭	B	4	73.14	C	58.64	CCC	68.83	BBB	83.46	专用设备制造业	地面兵装	地面兵装Ⅲ
519	2016	中兵红箭	B	4	72.68	C	58.64	CCC	67.33	BBB	83.46	专用设备制造业	地面兵装	地面兵装Ⅲ
519	2017	中兵红箭	CCC	3	69.36	C	55.17	B	70.95	BB	75.54	专用设备制造业	地面兵装	地面兵装Ⅲ
519	2018	中兵红箭	CC	2	63.95	C	52	CCC	66.07	CCC	68.61	专用设备制造业	地面兵装	地面兵装Ⅲ
519	2019	中兵红箭	CC	2	61.49	C	56.51	CCC	67.56	C	59.94	专用设备制造业	地面兵装	地面兵装Ⅲ
519	2020	中兵红箭	CCC	3	68.08	CC	60.37	B	73.13	CCC	68.61	专用设备制造业	地面兵装	地面兵装Ⅲ
519	2021	中兵红箭	CCC	3	69.99	CC	61.15	B	70.64	BB	76.02	专用设备制造业	地面兵装	地面兵装Ⅲ
519	2022	中兵红箭	B	4	71.83	CC	61.15	B	72.97	BB	78.89	专用设备制造业	地面兵装	地面兵装Ⅲ
519	2023	中兵红箭	B	4	73.17	CC	61.15	B	73.97	BBB	81.42	专用设备制造业	地面兵装	地面兵装Ⅲ
519	2024	中兵红箭	CC	2	64.55	C	59.06	B	70.77	BBB	84.87	专用设备制造业	地面兵装	地面兵装Ⅲ
520	2009	凤凰航运	B	4	72.53	C	59.31	C	53.37	A	88.4	水上运输业	航运	航运
520	2010	凤凰航运	CCC	3	65.63	C	56.36	C	55.1	BB	75.48	水上运输业	航运	航运
520	2011	凤凰航运	CCC	3	67.29	C	58.08	C	50.56	BB	79.85	水上运输业	航运	航运
520	2012	凤凰航运	CC	2	62.38	C	56.36	C	46.03	B	72.97	水上运输业	航运	航运
520	2013	凤凰航运	CC	2	61.12	C	58.08	C	38.15	B	72.97	水上运输业	航运	航运
520	2014	凤凰航运	CC	2	60.76	C	58.08	C	38.15	B	72.25	水上运输业	航运	航运
520	2015	凤凰航运	CC	2	63.12	C	58.08	C	38.15	BB	76.99	水上运输业	航运	航运
520	2016	凤凰航运	CC	2	62.07	C	54.64	C	38.15	BB	76.81	水上运输业	航运	航运
520	2017	凤凰航运	CC	2	63.14	C	53.02	C	39.34	BB	79.32	水上运输业	航运	航运
520	2018	凤凰航运	CC	2	62	C	53.02	C	38.15	BB	77.58	水上运输业	航运	航运
520	2019	凤凰航运	CC	2	64.41	C	53.02	C	38.15	BBB	82.4	水上运输业	航运	航运
520	2020	凤凰航运	CC	2	62.19	C	52.81	C	34.8	BB	79.54	水上运输业	航运	航运
520	2021	凤凰航运	CCC	3	69.51	C	57.76	B	71.25	BB	78.94	水上运输业	航运	航运
520	2022	凤凰航运	B	4	70.64	C	57.76	B	72.17	BBB	81.25	水上运输业	航运	航运
520	2023	凤凰航运	B	4	70.72	C	57.76	B	73.38	BBB	80.6	水上运输业	航运	航运
520	2024	凤凰航运	C	1	53.68	C	58.46	B	74.08	BB	77.39	水上运输业	航运	航运
521	2009	长虹美菱	BB	5	75.89	CCC	65.74	BB	76.01	BBB	81	电气机械和器材制造业	冰洗	冰洗
521	2010	长虹美菱	B	4	70.79	CC	60.09	CC	63.77	BBB	81	电气机械和器材制造业	冰洗	冰洗
521	2011	长虹美菱	B	4	73.95	CC	63.46	CCC	69.96	BBB	82	电气机械和器材制造业	冰洗	冰洗
521	2012	长虹美菱	BB	5	79.2	B	70.52	BB	78.66	BBB	83.99	电气机械和器材制造业	冰洗	冰洗
521	2013	长虹美菱	BB	5	76.96	B	70.52	BB	75.85	BBB	81	电气机械和器材制造业	冰洗	冰洗
521	2014	长虹美菱	B	4	73.18	B	70.52	CCC	69.25	BB	77.19	电气机械和器材制造业	冰洗	冰洗
521	2015	长虹美菱	BB	5	76.09	CCC	68.94	BB	78.66	BB	78.01	电气机械和器材制造业	冰洗	冰洗
521	2016	长虹美菱	B	4	74.4	CCC	67.36	BB	75.85	BB	77.01	电气机械和器材制造业	冰洗	冰洗
521	2017	长虹美菱	B	4	73.22	CCC	66.95	B	71.14	BB	77.83	电气机械和器材制造业	冰洗	冰洗
521	2018	长虹美菱	B	4	70.75	CC	62.66	CCC	69.34	BB	75.82	电气机械和器材制造业	冰洗	冰洗
521	2019	长虹美菱	CCC	3	69.12	CC	62.66	BB	75.42	CCC	68.16	电气机械和器材制造业	冰洗	冰洗
521	2020	长虹美菱	CCC	3	69.38	CC	62.66	B	70.72	B	71.91	电气机械和器材制造业	冰洗	冰洗
521	2021	长虹美菱	B	4	73.85	CCC	67.53	BBB	82.66	CCC	69.7	电气机械和器材制造业	冰洗	冰洗
521	2022	长虹美菱	B	4	74.98	CCC	66.47	BBB	80.41	BB	75.09	电气机械和器材制造业	冰洗	冰洗
521	2023	长虹美菱	BB	5	75.04	CCC	68.58	BBB	82.13	B	72.5	电气机械和器材制造业	冰洗	冰洗
521	2024	长虹美菱	A	7	85.37	BB	77.48	BBB	84.82	BBB	84.43	电气机械和器材制造业	冰洗	冰洗
523	2009	红棉股份	BB	5	75.65	CCC	67.32	CC	64.98	A	87.09	化学原料和化学制品制造业	商业物业经营	洗护用品
523	2010	红棉股份	B	4	74.98	CCC	67.32	CCC	66.47	BBB	84.63	化学原料和化学制品制造业	商业物业经营	洗护用品
523	2011	红棉股份	B	4	73.5	CCC	67.32	CC	60.45	A	85.45	化学原料和化学制品制造业	商业物业经营	洗护用品
523	2012	红棉股份	B	4	74.98	CCC	67.32	CCC	66.47	BBB	84.63	化学原料和化学制品制造业	商业物业经营	洗护用品
523	2013	红棉股份	BB	5	76.89	CCC	67.32	B	72.67	BBB	84.63	化学原料和化学制品制造业	商业物业经营	洗护用品
523	2014	红棉股份	B	4	73.24	CCC	67.32	CC	63.26	BBB	82.99	化学原料和化学制品制造业	商业物业经营	洗护用品
523	2015	红棉股份	B	4	73.55	CCC	67.32	CC	64.26	BBB	82.99	化学原料和化学制品制造业	商业物业经营	洗护用品
523	2016	红棉股份	B	4	75	CCC	67.32	CCC	68.96	BBB	82.99	化学原料和化学制品制造业	商业物业经营	洗护用品
523	2017	红棉股份	BB	5	75.71	B	71.97	CCC	68.96	BBB	82.17	化学原料和化学制品制造业	商业物业经营	洗护用品
523	2018	红棉股份	B	4	73.13	B	73.55	B	70.32	B	74.81	化学原料和化学制品制造业	商业物业经营	洗护用品
523	2019	红棉股份	CCC	3	69.05	B	73.55	CCC	65.61	CCC	69.07	化学原料和化学制品制造业	商业物业经营	洗护用品
523	2020	红棉股份	B	4	74.01	B	71.97	B	70.95	BB	77.12	化学原料和化学制品制造业	商业物业经营	洗护用品
523	2021	红棉股份	CC	2	63.4	CC	60.49	B	73.6	C	58.21	化学原料和化学制品制造业	商业物业经营	洗护用品
523	2022	红棉股份	CCC	3	65.08	CC	60.49	B	71.22	CC	63.79	化学原料和化学制品制造业	商业物业经营	洗护用品
523	2023	红棉股份	CCC	3	68.84	CCC	69.54	CCC	69.13	CCC	68.18	化学原料和化学制品制造业	商业物业经营	洗护用品
523	2024	红棉股份	CC	2	62.96	B	70.79	B	74.64	BB	76.04	农副食品加工业	综合Ⅲ	综合Ⅲ
524	2009	岭南控股	CCC	3	69.66	C	41.55	B	72.75	BB	78.39	商务服务业	旅游综合	旅游综合
524	2010	岭南控股	CCC	3	69.86	C	43.58	BB	78.2	BB	76.47	商务服务业	旅游综合	旅游综合
524	2011	岭南控股	B	4	73.21	C	45.61	BB	78.2	BBB	81.23	商务服务业	旅游综合	旅游综合
524	2012	岭南控股	B	4	74.16	C	45.61	BBB	83.65	BBB	81.23	商务服务业	旅游综合	旅游综合
524	2013	岭南控股	B	4	73.28	C	47.63	BBB	83.65	BB	79.1	商务服务业	旅游综合	旅游综合
524	2014	岭南控股	B	4	74.16	C	45.61	BBB	83.65	BBB	81.23	商务服务业	旅游综合	旅游综合
524	2015	岭南控股	B	4	71.84	C	43.58	B	72.75	BBB	81.23	商务服务业	旅游综合	旅游综合
524	2016	岭南控股	BB	5	75.01	C	49.66	BBB	83.65	BBB	81.23	商务服务业	旅游综合	旅游综合
524	2017	岭南控股	B	4	74.56	C	43	A	89.1	BBB	81.23	商务服务业	旅游综合	旅游综合
524	2018	岭南控股	BB	5	77.74	C	53.25	AAA	100	BB	79.81	商务服务业	旅游综合	旅游综合
524	2019	岭南控股	BB	5	78.82	C	53.25	AA	94.55	BBB	83.09	商务服务业	旅游综合	旅游综合
524	2020	岭南控股	BB	5	77.45	C	56.72	A	89.1	BBB	81.23	商务服务业	旅游综合	旅游综合
524	2021	岭南控股	CCC	3	69.49	C	57.02	BB	75.88	BB	75.66	商务服务业	旅游综合	旅游综合
524	2022	岭南控股	CCC	3	69.95	C	57.02	B	73.09	BB	78.42	商务服务业	旅游综合	旅游综合
524	2023	岭南控股	CCC	3	69.61	C	57.02	BB	75.64	BB	76.09	商务服务业	旅游综合	旅游综合
524	2024	岭南控股	CCC	3	67.36	C	57.02	BB	76.86	BB	78.36	商务服务业	旅游综合	旅游综合
525	2009	ST红太阳	BB	5	76.08	C	59.25	B	74.39	A	85.81	化学原料和化学制品制造业	农药	农药
525	2010	ST红太阳	BB	5	75.44	C	59.25	B	73.53	BBB	84.99	化学原料和化学制品制造业	农药	农药
525	2011	ST红太阳	CCC	3	67.9	C	48.79	C	59.44	BBB	83.35	化学原料和化学制品制造业	农药	农药
525	2012	ST红太阳	B	4	72.28	CCC	66.3	BBB	81.01	CCC	69.45	化学原料和化学制品制造业	农药	农药
525	2013	ST红太阳	B	4	74.59	CCC	66.3	BBB	82.73	B	73.32	化学原料和化学制品制造业	农药	农药
525	2014	ST红太阳	B	4	72.71	CCC	66.3	BBB	80.38	B	70.81	化学原料和化学制品制造业	农药	农药
525	2015	ST红太阳	B	4	73.24	CCC	66.3	B	74.82	BB	75.73	化学原料和化学制品制造业	农药	农药
525	2016	ST红太阳	CCC	3	69.9	C	52.02	B	71.83	BB	77.72	化学原料和化学制品制造业	农药	农药
525	2017	ST红太阳	B	4	71.49	C	53.41	BB	77.17	BB	76.9	化学原料和化学制品制造业	农药	农药
525	2018	ST红太阳	BB	5	77.37	CC	64.78	A	89.36	BB	75.72	化学原料和化学制品制造业	农药	农药
525	2019	ST红太阳	B	4	74.2	CCC	68.36	A	86.38	CCC	68.98	化学原料和化学制品制造业	农药	农药
525	2020	ST红太阳	CC	2	62.78	B	71.93	BB	79.95	C	46.52	化学原料和化学制品制造业	农药	农药
525	2021	ST红太阳	CC	2	64.75	CC	61.3	BBB	82.13	C	57.03	化学原料和化学制品制造业	农药	农药
525	2022	ST红太阳	CC	2	64.07	CC	60.6	BB	79.26	C	57.85	化学原料和化学制品制造业	农药	农药
525	2023	ST红太阳	CC	2	62.77	CC	62.08	B	74.68	C	55.54	化学原料和化学制品制造业	农药	农药
525	2024	ST红太阳	C	1	55.34	CC	63.93	BBB	84.95	C	54.6	化学原料和化学制品制造业	农药	农药
526	2009	学大教育	CCC	3	68.72	C	49.92	C	57.62	A	87.81	教育	教育Ⅲ	培训教育
526	2010	学大教育	CCC	3	66.1	C	49.92	C	52.74	A	85.79	教育	教育Ⅲ	培训教育
526	2011	学大教育	CC	2	64.34	C	49.92	C	47.86	A	85.79	教育	教育Ⅲ	培训教育
526	2012	学大教育	CC	2	63.04	C	45.21	C	47.86	A	85.11	教育	教育Ⅲ	培训教育
526	2013	学大教育	CCC	3	65.98	C	50.8	C	47.86	A	89.21	教育	教育Ⅲ	培训教育
526	2014	学大教育	CCC	3	65.73	C	50.8	C	52.74	BBB	84.46	教育	教育Ⅲ	培训教育
526	2015	学大教育	CCC	3	65.01	C	50.8	C	50.3	BBB	84.83	教育	教育Ⅲ	培训教育
526	2016	学大教育	C	1	56.04	C	45.21	C	47.86	CCC	68.55	教育	教育Ⅲ	培训教育
526	2017	学大教育	C	1	53.11	C	45.96	BB	79.76	C	34	教育	教育Ⅲ	培训教育
526	2018	学大教育	C	1	46.45	C	45.96	C	55.18	C	39.24	教育	教育Ⅲ	培训教育
526	2019	学大教育	CC	2	63.71	C	48.75	CC	62.12	B	72.7	教育	教育Ⅲ	培训教育
526	2020	学大教育	CCC	3	67.98	C	52.07	CC	64.56	BB	79.02	教育	教育Ⅲ	培训教育
526	2021	学大教育	B	4	72.65	CCC	66.84	CCC	69.17	BB	77.26	教育	教育Ⅲ	培训教育
526	2022	学大教育	B	4	70.16	CCC	66.84	CCC	66.85	B	73.93	教育	教育Ⅲ	培训教育
526	2023	学大教育	B	4	73.19	CCC	66.84	B	70.23	BB	77.49	教育	教育Ⅲ	培训教育
526	2024	学大教育	CC	2	64.82	CCC	66.84	B	73.55	B	71.17	教育	教育Ⅲ	培训教育
528	2009	柳工	B	4	72.11	C	59.19	CCC	67.51	BBB	81.82	专用设备制造业	工程机械	工程机械整机
528	2010	柳工	BB	5	77.47	CCC	66.21	BB	75.47	BBB	84.58	专用设备制造业	工程机械	工程机械整机
528	2011	柳工	B	4	74.57	CCC	66.21	CCC	66.06	BBB	84.58	专用设备制造业	工程机械	工程机械整机
528	2012	柳工	BB	5	78.09	CC	64.67	BBB	82.73	BBB	81.82	专用设备制造业	工程机械	工程机械整机
528	2013	柳工	BB	5	78.5	CC	63.49	BB	78.81	A	85.96	专用设备制造业	工程机械	工程机械整机
528	2014	柳工	BB	5	79.65	CCC	68.87	BB	77.24	A	86.78	专用设备制造业	工程机械	工程机械整机
528	2015	柳工	BB	5	78.96	CCC	67.08	B	74.89	A	87.78	专用设备制造业	工程机械	工程机械整机
528	2016	柳工	BB	5	77.44	CCC	65.5	B	72.38	A	86.96	专用设备制造业	工程机械	工程机械整机
528	2017	柳工	BB	5	78.38	CC	61.84	BB	78.17	A	86.96	专用设备制造业	工程机械	工程机械整机
528	2018	柳工	BBB	6	83.57	CC	64.26	AA	94.36	A	86.14	专用设备制造业	工程机械	工程机械整机
528	2019	柳工	BBB	6	83.94	CC	62.87	AA	94.21	A	87.78	专用设备制造业	工程机械	工程机械整机
528	2020	柳工	BBB	6	84.18	B	70.21	AA	91.86	A	86.14	专用设备制造业	工程机械	工程机械整机
528	2021	柳工	BB	5	75.76	CCC	66.64	BBB	83.83	BB	77.78	专用设备制造业	工程机械	工程机械整机
528	2022	柳工	B	4	72.72	CC	60.1	BBB	82.93	BB	76.11	专用设备制造业	工程机械	工程机械整机
528	2023	柳工	BB	5	75.49	CC	60.85	A	85.24	BBB	80.76	专用设备制造业	工程机械	工程机械整机
528	2024	柳工	BB	5	77.89	CC	64.31	A	87.7	BBB	81.17	专用设备制造业	工程机械Ⅲ	工程机械整机
529	2009	广弘控股	CCC	3	66.58	C	52.87	C	53.04	BBB	82.72	农副食品加工业	肉制品	肉制品
529	2010	广弘控股	B	4	74.14	C	55.82	B	70.55	A	85.91	农副食品加工业	肉制品	肉制品
529	2011	广弘控股	B	4	72.31	C	59.4	CCC	69.05	BBB	81.11	农副食品加工业	肉制品	肉制品
529	2012	广弘控股	B	4	74.5	C	57.82	B	71.41	A	85.09	农副食品加工业	肉制品	肉制品
529	2013	广弘控股	B	4	74.6	C	59.4	B	70.55	A	85.09	农副食品加工业	肉制品	肉制品
529	2014	广弘控股	B	4	74	C	56.03	CCC	69.69	A	86.09	农副食品加工业	肉制品	肉制品
529	2015	广弘控股	B	4	73.45	C	54.45	CCC	65.84	A	88.29	农副食品加工业	肉制品	肉制品
529	2016	广弘控股	B	4	71.88	C	50.87	CCC	68.19	A	85.09	农副食品加工业	肉制品	肉制品
529	2017	广弘控股	B	4	72.76	C	51.56	CCC	69.05	A	86.09	农副食品加工业	肉制品	肉制品
529	2018	广弘控股	B	4	73.82	C	56.94	B	71.64	BBB	83.91	农副食品加工业	肉制品	肉制品
529	2019	广弘控股	B	4	72.24	C	40.86	BB	78.69	BBB	83.91	农副食品加工业	肉制品	肉制品
529	2020	广弘控股	CCC	3	69.65	C	46.42	CCC	67.56	BBB	82.91	农副食品加工业	肉制品	肉制品
529	2021	广弘控股	CCC	3	68.43	C	58.52	BB	76.55	B	71.97	农副食品加工业	肉制品	肉制品
529	2022	广弘控股	CCC	3	67.91	C	58.52	BB	75.93	B	71.03	农副食品加工业	肉制品	肉制品
529	2023	广弘控股	CCC	3	69.44	C	58.52	B	71.6	BB	78.1	农副食品加工业	肉制品	肉制品
529	2024	广弘控股	CCC	3	65.03	C	58.99	B	71.6	BB	79.31	农副食品加工业	肉制品	肉制品
530	2009	冰山冷热	B	4	71.32	C	55.88	C	59.06	A	87.47	通用设备制造业	制冷空调设备	制冷空调设备
530	2010	冰山冷热	B	4	72.47	C	55.88	CC	62.8	A	87.47	通用设备制造业	制冷空调设备	制冷空调设备
530	2011	冰山冷热	B	4	73.02	C	55.88	B	70.23	BBB	83.66	通用设备制造业	制冷空调设备	制冷空调设备
530	2012	冰山冷热	B	4	72.46	C	55.88	B	71.68	BBB	81.46	通用设备制造业	制冷空调设备	制冷空调设备
530	2013	冰山冷热	B	4	72.6	C	57.67	CCC	67.51	BBB	83.66	通用设备制造业	制冷空调设备	制冷空调设备
530	2014	冰山冷热	B	4	72.58	C	59.86	CC	63.74	A	85.04	通用设备制造业	制冷空调设备	制冷空调设备
530	2015	冰山冷热	B	4	74.79	CC	61.65	CCC	65.09	A	88.03	通用设备制造业	制冷空调设备	制冷空调设备
530	2016	冰山冷热	B	4	72.28	C	58.5	CC	64.09	BBB	84.84	通用设备制造业	制冷空调设备	制冷空调设备
530	2017	冰山冷热	BB	5	77.87	CCC	67.11	BB	76.91	BBB	84.02	通用设备制造业	制冷空调设备	制冷空调设备
530	2018	冰山冷热	B	4	73.12	C	58.58	CCC	69.99	BBB	82.65	通用设备制造业	制冷空调设备	制冷空调设备
530	2019	冰山冷热	CCC	3	69.96	C	58.58	CCC	69.86	BB	75.85	通用设备制造业	制冷空调设备	制冷空调设备
530	2020	冰山冷热	B	4	71.98	C	58.58	CCC	67.5	BBB	81.83	通用设备制造业	制冷空调设备	制冷空调设备
530	2021	冰山冷热	B	4	72.91	C	57.94	BBB	80.51	BB	79.77	通用设备制造业	制冷空调设备	制冷空调设备
530	2022	冰山冷热	B	4	72.37	C	57.72	BB	79	BB	79.6	通用设备制造业	制冷空调设备	制冷空调设备
530	2023	冰山冷热	B	4	74.72	CC	62.48	BB	76.02	BBB	83.42	通用设备制造业	制冷空调设备	制冷空调设备
530	2024	冰山冷热	CCC	3	69.24	CC	60.33	BBB	82.41	BB	75.57	通用设备制造业	制冷空调设备	制冷空调设备
531	2009	穗恒运A	B	4	73.06	C	58.4	B	71.9	BBB	80.75	电力、热力生产和供应业	火电	火力发电
531	2010	穗恒运A	B	4	73.69	C	58.4	CCC	69.63	BBB	83.4	电力、热力生产和供应业	火电	火力发电
531	2011	穗恒运A	B	4	74.32	CC	61.13	CCC	69.63	BBB	83.4	电力、热力生产和供应业	火电	火力发电
531	2012	穗恒运A	BB	5	76.48	C	59.77	BB	78.29	BBB	83.4	电力、热力生产和供应业	火电	火力发电
531	2013	穗恒运A	B	4	73.64	C	59.77	CCC	69.63	BBB	82.65	电力、热力生产和供应业	火电	火力发电
531	2014	穗恒运A	B	4	74.32	CC	61.13	CCC	69.63	BBB	83.4	电力、热力生产和供应业	火电	火力发电
531	2015	穗恒运A	BB	5	75.63	C	59.77	BB	76.57	BBB	82.65	电力、热力生产和供应业	火电	火力发电
531	2016	穗恒运A	B	4	74.82	C	57.84	BB	76.57	BBB	81.89	电力、热力生产和供应业	火电	火力发电
531	2017	穗恒运A	B	4	74.36	C	57.25	BB	75.46	BBB	81.89	电力、热力生产和供应业	火电	火力发电
531	2018	穗恒运A	BB	5	75.62	CC	60.17	BB	78.34	BBB	81.38	电力、热力生产和供应业	火电	火力发电
531	2019	穗恒运A	BB	5	76.67	CC	62.1	BB	78.34	BBB	82.65	电力、热力生产和供应业	火电	火力发电
531	2020	穗恒运A	BB	5	76.64	CC	62.1	BB	75.46	BBB	84.3	电力、热力生产和供应业	火电	火力发电
531	2021	穗恒运A	B	4	72.65	CC	62.1	B	74.3	BBB	83.27	电力、热力生产和供应业	火电	火力发电
531	2022	穗恒运A	B	4	72.11	CC	62.68	B	73.83	BBB	81.46	电力、热力生产和供应业	火电	火力发电
531	2023	穗恒运A	B	4	71.16	CC	62.68	B	73.83	BB	78.98	电力、热力生产和供应业	火电	火力发电
531	2024	穗恒运A	C	1	55.09	C	57.66	BB	75.35	BB	77.92	电力、热力生产和供应业	火电	火力发电
532	2009	华金资本	B	4	71.27	C	55.57	CCC	69.3	BB	79.82	综合	多元金融	资产管理
532	2010	华金资本	BB	5	77.08	CC	64.67	CCC	67.38	A	89.15	综合	多元金融	资产管理
532	2011	华金资本	BB	5	79.93	B	72.35	BB	78.08	BBB	84.64	综合	多元金融	资产管理
532	2012	华金资本	B	4	71.87	C	57.28	CCC	67	BBB	81.81	综合	多元金融	资产管理
532	2013	华金资本	B	4	71.61	CCC	66.67	CC	60.95	BBB	80.84	综合	多元金融	资产管理
532	2014	华金资本	B	4	71.69	CC	63.25	CCC	65.87	BB	79.38	综合	多元金融	资产管理
532	2015	华金资本	B	4	70.46	CCC	68.38	C	58.49	BB	79.23	综合	多元金融	资产管理
532	2016	华金资本	CCC	3	69.14	C	55.57	CC	64.54	BB	78.42	综合	多元金融	资产管理
532	2017	华金资本	CCC	3	66.12	C	57.96	B	70.34	CCC	67.15	综合	多元金融	资产管理
532	2018	华金资本	CCC	3	66.73	C	59.67	CCC	65.66	B	70.7	综合	多元金融	资产管理
532	2019	华金资本	CCC	3	66.65	C	56.58	CC	63.2	B	73.56	综合	多元金融	资产管理
532	2020	华金资本	B	4	70.09	C	59.67	CCC	66.54	BB	77.23	综合	多元金融	资产管理
532	2021	华金资本	B	4	72.5	CC	64.19	B	72.35	BB	76.93	综合	多元金融	资产管理
532	2022	华金资本	B	4	74.4	CC	64.19	B	73.41	BBB	80.43	综合	多元金融	资产管理
532	2023	华金资本	B	4	71.09	CC	64.19	B	74.29	B	72.38	综合	多元金融	资产管理
532	2024	华金资本	CCC	3	69.75	CCC	68.08	B	72.05	BB	79.67	综合	多元金融Ⅲ	资产管理
533	2009	顺钠股份	B	4	70.77	CC	60.09	CCC	67.61	BB	78.36	电气机械和器材制造业	输变电设备	输变电设备
533	2010	顺钠股份	CCC	3	67.76	C	53.56	CC	62.8	BB	78.36	电气机械和器材制造业	输变电设备	输变电设备
533	2011	顺钠股份	CCC	3	68.4	C	56.72	CCC	66.12	BB	75.91	电气机械和器材制造业	输变电设备	输变电设备
533	2012	顺钠股份	CCC	3	68.79	CC	60.09	CC	62.41	BB	77.54	电气机械和器材制造业	输变电设备	输变电设备
533	2013	顺钠股份	CCC	3	65.55	CC	61.88	CC	63.77	CCC	68.62	电气机械和器材制造业	输变电设备	输变电设备
533	2014	顺钠股份	B	4	70.15	CC	61.88	B	73.53	B	72.08	电气机械和器材制造业	输变电设备	输变电设备
533	2015	顺钠股份	B	4	71.1	C	58.51	B	72.17	BB	76.81	电气机械和器材制造业	输变电设备	输变电设备
533	2016	顺钠股份	B	4	71.6	CC	60.09	CCC	66.12	BBB	81.18	电气机械和器材制造业	输变电设备	输变电设备
533	2017	顺钠股份	CCC	3	69.12	C	55.33	CC	62.91	BBB	80.36	电气机械和器材制造业	输变电设备	输变电设备
533	2018	顺钠股份	CCC	3	69.29	CC	60.3	C	59.56	BBB	80.45	电气机械和器材制造业	输变电设备	输变电设备
533	2019	顺钠股份	C	1	57.79	C	56.93	C	59.56	C	57.04	电气机械和器材制造业	输变电设备	输变电设备
533	2020	顺钠股份	CC	2	60.93	C	58.1	CC	62.91	CC	61.05	电气机械和器材制造业	输变电设备	输变电设备
533	2021	顺钠股份	CCC	3	66.43	C	57.76	B	71.22	B	70.85	电气机械和器材制造业	输变电设备	输变电设备
533	2022	顺钠股份	CCC	3	65.64	C	58.36	B	72.34	CCC	67.73	电气机械和器材制造业	输变电设备	输变电设备
533	2023	顺钠股份	CC	2	64.02	C	55.97	B	71.93	CCC	66.01	电气机械和器材制造业	输变电设备	输变电设备
533	2024	顺钠股份	BBB	6	82.53	BB	78.37	A	85.15	BB	77.06	电气机械和器材制造业	输变电设备	输变电设备
534	2009	万泽股份	BB	5	77.69	C	51.51	A	85.16	BB	79.26	医药制造业	其他生物制品	其他生物制品
534	2010	万泽股份	B	4	73.92	CC	63.44	B	72.88	BB	78.37	医药制造业	其他生物制品	其他生物制品
534	2011	万泽股份	BB	5	78.17	CCC	65.02	BBB	83.49	BB	77.48	医药制造业	其他生物制品	其他生物制品
534	2012	万泽股份	B	4	73.07	C	54.89	BBB	83.07	CCC	69.6	医药制造业	其他生物制品	其他生物制品
534	2013	万泽股份	B	4	70.56	C	51.51	B	74.71	B	72.91	医药制造业	其他生物制品	其他生物制品
534	2014	万泽股份	BB	5	75.25	C	58.04	BB	78.89	BB	77.48	医药制造业	其他生物制品	其他生物制品
534	2015	万泽股份	B	4	72.25	CC	61.42	BB	76.8	B	71.51	医药制造业	其他生物制品	其他生物制品
534	2016	万泽股份	BB	5	75.12	C	54.67	BB	76.8	BBB	80.28	医药制造业	其他生物制品	其他生物制品
534	2017	万泽股份	CCC	3	67.36	C	53.99	BB	76.8	CC	62.83	医药制造业	其他生物制品	其他生物制品
534	2018	万泽股份	B	4	73.04	C	53.99	BBB	80.98	B	71.8	医药制造业	其他生物制品	其他生物制品
534	2019	万泽股份	C	1	59.54	C	51.77	CC	61.64	CC	62.08	医药制造业	其他生物制品	其他生物制品
534	2020	万泽股份	CC	2	60.05	C	51.77	B	70.82	C	57.01	医药制造业	其他生物制品	其他生物制品
534	2021	万泽股份	B	4	70.27	C	56.64	B	73.97	B	73.79	医药制造业	其他生物制品	其他生物制品
534	2022	万泽股份	B	4	72.27	C	56.64	B	74.08	BB	78.27	医药制造业	其他生物制品	其他生物制品
534	2023	万泽股份	B	4	72.56	C	56.64	B	74.29	BB	78.76	医药制造业	其他生物制品	其他生物制品
534	2024	万泽股份	CC	2	61.45	CC	60.27	B	71.48	B	72.83	医药制造业	其他生物制品	其他生物制品
536	2009	华映科技	B	4	74.55	CCC	65.02	CCC	68.93	BBB	83.2	计算机、通信和其他电子设备制造业	面板	面板
536	2010	华映科技	BB	5	75.8	CC	60.07	CCC	68.93	A	88.47	计算机、通信和其他电子设备制造业	面板	面板
536	2011	华映科技	BB	5	76.03	CC	64.48	B	73.47	BBB	83.66	计算机、通信和其他电子设备制造业	面板	面板
536	2012	华映科技	B	4	71.76	CC	62.9	CC	62.57	BBB	82.49	计算机、通信和其他电子设备制造业	面板	面板
536	2013	华映科技	B	4	71.49	CC	62.9	CC	61.25	BBB	82.79	计算机、通信和其他电子设备制造业	面板	面板
536	2014	华映科技	B	4	73.55	CC	61.11	BB	76.54	BB	77.87	计算机、通信和其他电子设备制造业	面板	面板
536	2015	华映科技	CCC	3	69.7	C	59.53	CCC	65.28	BB	77.87	计算机、通信和其他电子设备制造业	面板	面板
536	2016	华映科技	B	4	74.05	CCC	65.72	B	71.98	BB	79.69	计算机、通信和其他电子设备制造业	面板	面板
536	2017	华映科技	CCC	3	69.53	CC	63.74	C	57.9	BBB	80.33	计算机、通信和其他电子设备制造业	面板	面板
536	2018	华映科技	CCC	3	66.29	C	57.54	C	56.55	BB	77.33	计算机、通信和其他电子设备制造业	面板	面板
536	2019	华映科技	C	1	56.98	CC	60.37	CC	63.6	C	50.79	计算机、通信和其他电子设备制造业	面板	面板
536	2020	华映科技	C	1	57.55	CC	63.53	C	57.33	C	54.65	计算机、通信和其他电子设备制造业	面板	面板
536	2021	华映科技	B	4	71.28	CCC	67.11	BB	79.94	CCC	67.19	计算机、通信和其他电子设备制造业	面板	面板
536	2022	华映科技	B	4	72.06	CCC	68.08	BBB	81.12	CCC	67.59	计算机、通信和其他电子设备制造业	面板	面板
536	2023	华映科技	B	4	73.56	CCC	69.21	BBB	80.99	B	70.47	计算机、通信和其他电子设备制造业	面板	面板
536	2024	华映科技	CC	2	61.62	CCC	67.25	BBB	83.13	CC	63.47	计算机、通信和其他电子设备制造业	面板	面板
537	2009	中绿电	BB	5	75.71	C	58.49	BB	78.89	BB	78.37	房地产业	新能源发电	风力发电
537	2010	中绿电	B	4	71.75	C	55.11	B	70.54	BB	78.37	房地产业	新能源发电	风力发电
537	2011	中绿电	B	4	74.31	C	53.88	B	74.71	BBB	80.66	房地产业	新能源发电	风力发电
537	2012	中绿电	BB	5	77	C	53.31	BBB	80.98	BBB	81.04	房地产业	新能源发电	风力发电
537	2013	中绿电	BB	5	75.39	C	51.51	BB	76.8	BBB	81.93	房地产业	新能源发电	风力发电
537	2014	中绿电	BB	5	76.24	C	51.51	BB	76.8	BBB	83.84	房地产业	新能源发电	风力发电
537	2015	中绿电	B	4	74.59	C	51.51	B	74.71	BBB	82.07	房地产业	新能源发电	风力发电
537	2016	中绿电	BB	5	76.51	C	54.67	BBB	82.15	BB	78.37	房地产业	新能源发电	风力发电
537	2017	中绿电	BB	5	77.12	C	52.41	BBB	83.32	BB	79.4	房地产业	新能源发电	风力发电
537	2018	中绿电	BB	5	77.11	CC	60.52	BBB	84.99	BB	75.11	房地产业	新能源发电	风力发电
537	2019	中绿电	BB	5	76.5	CC	62.32	BBB	82.9	BB	75.11	房地产业	新能源发电	风力发电
537	2020	中绿电	BB	5	77.51	CC	62.32	BBB	83.32	BB	77.03	房地产业	新能源发电	风力发电
537	2021	中绿电	B	4	70.19	CC	62.85	B	72.52	BB	76.96	房地产业	新能源发电	风力发电
537	2022	中绿电	B	4	73.02	CC	62.85	B	72.9	BBB	84.16	房地产业	新能源发电	风力发电
537	2023	中绿电	B	4	72.77	CC	64.26	B	73.25	BBB	81.78	房地产业	新能源发电	风力发电
537	2024	中绿电	CC	2	62.06	CCC	66.75	B	74.58	BB	77.28	房地产业	新能源发电	风力发电
538	2009	云南白药	B	4	74.35	C	57.61	B	70.82	A	85.27	医药制造业	中药Ⅲ	中药Ⅲ
538	2010	云南白药	BB	5	76.5	CCC	65.18	B	72.46	A	85.02	医药制造业	中药Ⅲ	中药Ⅲ
538	2011	云南白药	BB	5	76.66	CC	63.6	B	71.27	A	86.96	医药制造业	中药Ⅲ	中药Ⅲ
538	2012	云南白药	B	4	72.04	C	57.61	CCC	66.98	BBB	82.82	医药制造业	中药Ⅲ	中药Ⅲ
538	2013	云南白药	B	4	72.76	C	55.82	B	70.68	BBB	82.82	医药制造业	中药Ⅲ	中药Ⅲ
538	2014	云南白药	BB	5	78.48	CC	61.81	BB	77.33	A	87.78	医药制造业	中药Ⅲ	中药Ⅲ
538	2015	云南白药	B	4	73.49	C	54.24	B	73.03	BBB	83.63	医药制造业	中药Ⅲ	中药Ⅲ
538	2016	云南白药	BB	5	79.84	CC	61.26	BBB	82.14	A	87.78	医药制造业	中药Ⅲ	中药Ⅲ
538	2017	云南白药	BB	5	77.48	CCC	66.57	B	74.63	BBB	84.96	医药制造业	中药Ⅲ	中药Ⅲ
538	2018	云南白药	BB	5	76.46	CC	61.41	B	72.28	A	86.96	医药制造业	中药Ⅲ	中药Ⅲ
538	2019	云南白药	B	4	74.41	CC	61.2	B	73.63	BBB	81.69	医药制造业	中药Ⅲ	中药Ⅲ
538	2020	云南白药	CCC	3	69.74	C	53.35	B	71.77	BB	76.73	医药制造业	中药Ⅲ	中药Ⅲ
538	2021	云南白药	BBB	6	81.59	BBB	81.18	BBB	82.12	BBB	81.36	医药制造业	中药Ⅲ	中药Ⅲ
538	2022	云南白药	A	7	85.87	BBB	83.22	A	89.57	BBB	84.15	医药制造业	中药Ⅲ	中药Ⅲ
538	2023	云南白药	BB	5	78.6	BBB	81.91	BBB	84.01	B	72.76	医药制造业	中药Ⅲ	中药Ⅲ
538	2024	云南白药	BBB	6	81.25	BBB	81.68	A	85.31	B	73.47	医药制造业	中药Ⅲ	中药Ⅲ
539	2009	粤电力A	BB	5	75.21	C	54.96	BB	76.87	BBB	83.9	电力、热力生产和供应业	火电	火力发电
539	2010	粤电力A	B	4	73.92	CC	61.74	CC	62.45	A	86.55	电力、热力生产和供应业	火电	火力发电
539	2011	粤电力A	BB	5	78.81	CCC	65.04	BB	76.87	A	86.55	电力、热力生产和供应业	火电	火力发电
539	2012	粤电力A	BB	5	77.47	CCC	67.95	B	71.1	A	85.79	电力、热力生产和供应业	火电	火力发电
539	2013	粤电力A	B	4	74.99	CCC	67.95	CC	62.45	A	85.79	电力、热力生产和供应业	火电	火力发电
539	2014	粤电力A	BBB	6	80.45	CCC	69.31	BB	79.14	A	86.55	电力、热力生产和供应业	火电	火力发电
539	2015	粤电力A	BB	5	79.15	CCC	67.38	B	73.37	A	88.2	电力、热力生产和供应业	火电	火力发电
539	2016	粤电力A	BB	5	78.78	CCC	67.38	B	73.37	A	87.44	电力、热力生产和供应业	火电	火力发电
539	2017	粤电力A	BB	5	79.36	CCC	69.52	BB	75.15	A	86.55	电力、热力生产和供应业	火电	火力发电
539	2018	粤电力A	BBB	6	80.29	CCC	66.41	BBB	80.92	A	86.55	电力、热力生产和供应业	火电	火力发电
[truncated: 50,454 more rows]
