# Supplementary material
Source: Research Square preprint supplement (doi:10.21203/rs.3.rs-9809611/v1)
Supplement: Supplementary file 2 [file 1d1b9455f5cf83fd24e0fd2f.xlsx]

## Sheet: 模板
RateYear	INDCLASSIFYSYSTEM	IndustryName	TatolRateNum	AARateNum	ARateNum	A_RateNum	BBRateNum	BRateNum	B_RateNum	CCRateNum	CRateNum	C_RateNum	DRateNum	ESGHighScore	ESGLowScore	ESGAverageScore	EAverageScore	SAverageScore	GAverageScore	ESGManagementAvgscore	ESGRiskAvgscore
评级年份	行业分类标准	行业名称	评级总数量	A+评级数量	A评级数量	A-评级数量	B+评级数量	B评级数量	B-评级数量	C+评级数量	C评级数量	C-评级数量	D评级数量	ESG最高分	ESG最低分	ESG平均分	E平均分	S平均分	G平均分	ESG管理平均分	ESG风险评估平均分
			个	个	个	个	个	个	个	个	个	个	个
2015	证监会行业	专用设备制造业	8	0	0	0	0	1	3	4	0	0	0	51.63	43	46.2538	44.6975	54.2163	39.71	15.705	92.0713
2015	证监会行业	互联网和相关服务	6	0	0	0	0	0	2	3	1	0	0	46.63	38.88	43.8367	46.3033	47.285	37.435	10.3833	94.01
2015	证监会行业	保险业	4	0	0	0	0	2	1	1	0	0	0	53.88	40.25	48.0025	51.59	53.9525	38.86	24.22	83.6725
2015	证监会行业	其他金融业	1	0	0	0	0	0	0	1	0	0	0	43.13	43.13	43.13	44.44	53.68	31.52	6.88	97.5
2015	证监会行业	农业	2	0	0	0	0	0	2	0	0	0	0	48.25	47.88	48.065	45.065	50.935	48.68	14.895	97.815
2015	证监会行业	农副食品加工业	3	0	0	0	0	0	2	1	0	0	0	47.25	42	45.3333	39.8033	50.98	45.9833	16.0433	89.2733
2015	证监会行业	化学原料及化学制品制造业	7	0	0	0	0	1	2	3	1	0	0	50.13	37.38	43.8971	44.5743	47.7614	38.3286	14.1686	88.4843
2015	证监会行业	医药制造业	20	0	0	0	1	3	12	4	0	0	0	62.13	43	48.1025	50.2115	51.68	41.815	17.8545	93.4695
2015	证监会行业	卫生	1	0	0	0	0	0	0	1	0	0	0	43.5	43.5	43.5	53.03	40	37.5	11.67	91.25
2015	证监会行业	商务服务业	5	0	0	0	0	0	4	1	0	0	0	47.13	41.5	45.128	51.568	47.728	36.12	13.126	93.126
2015	证监会行业	土木工程建筑业	12	0	0	0	1	3	4	1	3	0	0	55.38	30.88	45.805	47.9433	46.5275	41.9642	20.2442	84.1417
2015	证监会行业	广播、电视、电影和影视录音制作业	5	0	0	0	0	0	1	4	0	0	0	48.25	41.75	43.6	48.432	49.09	33.36	9.252	95.124
2015	证监会行业	建筑装饰和其他建筑业	2	0	0	0	0	0	1	1	0	0	0	47.25	42.88	45.065	45.51	51.895	36.385	15	90.155
2015	证监会行业	开采辅助活动	2	0	0	0	1	0	1	0	0	0	0	59.88	47.25	53.565	55.16	60.285	44.18	28.125	91.72
2015	证监会行业	房地产业	13	0	0	0	0	2	3	6	2	0	0	52.5	38.75	44.4446	45.1715	47.3438	40.5792	14.9838	88.63
2015	证监会行业	批发业	4	0	0	0	0	0	2	2	0	0	0	47.63	44	45.3775	53.4525	48.01	34.7	13.8525	92.655
2015	证监会行业	文化艺术业	1	0	0	0	0	0	0	1	0	0	0	44.5	44.5	44.5	47.76	46.97	38.81	10.42	95.63
2015	证监会行业	文教、工美、体育和娱乐用品制造业	1	0	0	0	0	0	1	0	0	0	0	45.63	45.63	45.63	44.08	47.79	45.09	9.38	100
2015	证监会行业	新闻和出版业	5	0	0	0	0	0	3	2	0	0	0	49	40.75	45.376	48.194	51.138	36.892	11.626	96
2015	证监会行业	有色金属冶炼和压延加工业	10	0	0	0	0	1	4	4	1	0	0	54	37.38	45.877	43.344	49.552	44.955	19.938	84.783
2015	证监会行业	有色金属矿采选业	7	0	0	0	0	0	2	5	0	0	0	48.63	41.25	43.9857	40.2686	52.3614	40.1471	14.14	88.7514
2015	证监会行业	橡胶和塑料制品业	1	0	0	0	0	0	0	1	0	0	0	44.38	44.38	44.38	43.51	50.75	37.95	12.29	92.5
2015	证监会行业	水上运输业	7	0	0	0	2	1	4	0	0	0	0	64.5	45.75	52.1271	53.8114	55.62	45.8743	22.7686	96.1614
2015	证监会行业	水的生产和供应业	3	0	0	0	0	0	1	2	0	0	0	45.5	41.75	43.5833	39.8133	53.04	38.3933	11.5267	91.6667
2015	证监会行业	汽车制造业	12	0	0	0	0	5	6	1	0	0	0	53.63	44.38	49.3883	47.0083	55.0975	46.1275	22.2742	90.0525
2015	证监会行业	煤炭开采和洗选业	9	0	0	0	2	1	1	3	2	0	0	58.5	39.25	47.0989	42.75	52.1489	47.8456	24.6533	80.7644
2015	证监会行业	燃气生产和供应业	1	0	0	0	0	0	1	0	0	0	0	47.88	47.88	47.88	41.98	53.17	50.45	18.13	92.5
2015	证监会行业	生态保护和环境治理业	2	0	0	0	0	0	1	1	0	0	0	46.63	44.75	45.69	47.765	51.325	38.06	15.935	90.315
2015	证监会行业	电信、广播电视和卫星传输服务	5	0	0	0	0	1	3	1	0	0	0	54.5	40.63	47.202	47.184	49.848	44.446	16	94.002
2015	证监会行业	电力、热力生产和供应业	16	0	0	0	0	5	6	4	1	0	0	54.63	37.25	47.1969	43.5188	54.3656	44.4481	17.1219	92.3056
2015	证监会行业	电气机械和器材制造业	8	0	0	0	0	1	5	2	0	0	0	50.75	43	46.7513	46.6263	51.135	41.9188	15.9138	93.0088
2015	证监会行业	石油加工、炼焦及核燃料加工业	1	0	0	0	0	0	1	0	0	0	0	50	50	50	45.78	45.52	61.16	27.5	83.75
2015	证监会行业	石油和天然气开采业	3	0	0	0	0	0	2	1	0	0	0	46.38	43	45.0867	45.0033	44.76	45.5467	30.07	67.6067
2015	证监会行业	租赁业	1	0	0	0	0	0	0	1	0	0	0	43	43	43	44.44	52.94	31.88	8.33	95
2015	证监会行业	纺织服装、服饰业	2	0	0	0	0	0	1	1	0	0	0	49.25	44.25	46.75	45.39	49.445	45.31	12.815	97.655
2015	证监会行业	综合	3	0	0	0	0	0	1	2	0	0	0	46.75	40.75	42.8333	47.44	51.7633	29.3567	9.5833	92.71
2015	证监会行业	航空运输业	7	0	0	0	1	1	3	1	1	0	0	55.63	38.75	47.4843	52.8957	46.5329	41.6871	18.2457	91.34
2015	证监会行业	计算机、通信和其他电子设备制造业	19	0	0	1	3	2	8	5	0	0	0	65.13	40.75	49.3711	50.1395	53.8068	43.3074	19.1132	94.7537
2015	证监会行业	货币金融服务	16	0	0	0	3	7	6	0	0	0	0	57.63	45.63	51.8788	54.91	51.8138	49.1613	30.4956	83.9475
2015	证监会行业	资本市场服务	21	0	0	0	0	2	12	7	0	0	0	54	41.38	46.3657	47.3938	52.6076	39.269	16.3505	91.3843
2015	证监会行业	软件和信息技术服务业	11	0	0	0	0	0	6	5	0	0	0	47.63	42.88	45.4455	48.3355	50.3091	37.0845	11.1182	96.9327
2015	证监会行业	通用设备制造业	4	0	0	0	0	1	3	0	0	0	0	53.13	46.38	49.065	49.92	55.655	40.73	19.9	92.8125
2015	证监会行业	道路运输业	1	0	0	0	0	0	1	0	0	0	0	47	47	47	44.59	51.84	44.4	16.46	92.81
2015	证监会行业	酒、饮料和精制茶制造业	7	0	0	0	0	3	1	2	1	0	0	54.75	39.13	46.7	45.7714	50.3157	43.5586	22.62	82.8143
2015	证监会行业	金属制品业	2	0	0	0	0	1	0	1	0	0	0	51.13	42	46.565	39.445	53.92	47.545	17.5	90.155
2015	证监会行业	铁路、船舶、航空航天和其他运输设备制造业	9	0	0	0	0	1	3	5	0	0	0	53.75	40.75	46.2667	41.7011	55.9511	41.9522	14.9544	93.2289
2015	证监会行业	铁路运输业	2	0	0	0	0	1	1	0	0	0	0	53.13	47	50.065	50.51	50.55	48.92	20.42	94.535
2015	证监会行业	零售业	6	0	0	0	1	1	1	1	2	0	0	55.25	36.5	45.335	48.9433	51.3883	35.7583	17.1183	87.6567
2015	证监会行业	非金属矿物制品业	4	0	0	0	0	0	2	1	1	0	0	48.25	39	44.5325	42.5325	49.4425	41.405	15.8875	87.5025
2015	证监会行业	食品制造业	6	0	0	0	0	0	1	5	0	0	0	46.25	41.38	43.355	38.7033	48.9567	42.8583	11.9433	90.47
2015	证监会行业	黑色金属冶炼和压延加工业	5	0	0	0	2	2	0	1	0	0	0	58.13	45	52.378	54.676	54.326	46.874	26.834	90.688
2015	证监会行业	黑色金属矿采选业	1	0	0	0	0	0	1	0	0	0	0	46.63	46.63	46.63	40.31	52.82	48.71	15.83	92.81
2016	证监会行业	专用设备制造业	8	0	0	0	0	1	6	1	0	0	0	50.5	42	46.3925	44.2625	54.165	40.84	16.145	91.76
2016	证监会行业	互联网和相关服务	8	0	0	0	0	0	3	4	1	0	0	46.63	37	43.4713	45.9513	48.105	35.815	10.26	93.2813
2016	证监会行业	住宿业	1	0	0	0	0	0	1	0	0	0	0	49.13	49.13	49.13	48.88	59.85	38.81	18.13	95.63
2016	证监会行业	保险业	5	0	0	0	0	2	2	1	0	0	0	54.13	40.63	48.83	50.558	55.956	40.218	22.708	88
2016	证监会行业	其他金融业	2	0	0	0	0	0	1	1	0	0	0	47.38	42.88	45.13	46.23	51.84	37.5	11.88	95
2016	证监会行业	农业	1	0	0	0	0	0	1	0	0	0	0	48.25	48.25	48.25	50	55.97	36.84	16.88	95.31
2016	证监会行业	农副食品加工业	4	0	0	0	0	1	2	0	1	0	0	50.5	39.25	45.875	39.555	52.39	46.5425	19.325	85.7025
2016	证监会行业	化学原料及化学制品制造业	6	0	0	0	0	1	2	0	3	0	0	53	35.13	43.6267	43.0717	48.5083	38.5417	15.695	85.5233
2016	证监会行业	医药制造业	18	0	0	0	1	3	7	7	0	0	0	64.63	42.38	47.5517	49.6289	51.5556	40.8378	18.3694	91.3206
2016	证监会行业	卫生	1	0	0	0	0	0	0	1	0	0	0	40.25	40.25	40.25	46.97	36.43	37.5	10.83	84.38
2016	证监会行业	商务服务业	6	0	0	0	0	0	1	5	0	0	0	45.25	41.5	44.2717	49.255	47.9783	35.635	11.5283	93.385
2016	证监会行业	土木工程建筑业	12	0	0	0	1	4	3	2	2	0	0	57.5	34.5	47.7617	48.745	48.7375	45.2383	23.4025	84.2983
2016	证监会行业	广播、电视、电影和影视录音制作业	6	0	0	0	0	0	2	3	1	0	0	49.88	39.38	43.9183	48.1967	49.18	34.4533	10.0683	94.6867
2016	证监会行业	建筑装饰和其他建筑业	1	0	0	0	0	0	0	0	1	0	0	39.38	39.38	39.38	39.74	46.59	30.36	11.88	80.63
2016	证监会行业	开采辅助活动	3	0	0	0	1	1	1	0	0	0	0	60.25	47	52.96	53.1267	58.33	46.9833	26.8733	92.0867
2016	证监会行业	房地产业	19	0	0	0	1	1	5	8	4	0	0	57.75	36.38	44.3189	44.2574	49.6611	38.9553	14.8374	88.5368
2016	证监会行业	批发业	5	0	0	0	1	0	3	1	0	0	0	56.75	44	48.502	55.298	51.742	38.508	18.874	92.938
2016	证监会行业	文化艺术业	1	0	0	0	0	0	0	1	0	0	0	43.88	43.88	43.88	45.9	46.97	38.81	11.04	93.13
2016	证监会行业	文教、工美、体育和娱乐用品制造业	1	0	0	0	0	0	0	1	0	0	0	44.63	44.63	44.63	41.45	47.79	45.09	9.38	97.5
2016	证监会行业	新闻和出版业	4	0	0	0	0	0	1	3	0	0	0	47.75	41.13	44.0025	47.2925	50.19	34.61	10.8325	93.75
2016	证监会行业	有色金属冶炼和压延加工业	6	0	0	0	0	2	1	2	1	0	0	51.75	37	45.9583	43.235	48.6933	46.4283	21.285	82.97
2016	证监会行业	有色金属矿采选业	5	0	0	0	0	0	0	5	0	0	0	43.63	42.25	43.052	40.062	50.888	38.792	16.584	82.752
2016	证监会行业	橡胶和塑料制品业	1	0	0	0	0	0	0	1	0	0	0	42.38	42.38	42.38	40.91	52.99	31.7	12.29	87.5
2016	证监会行业	水上运输业	6	0	0	0	3	0	2	1	0	0	0	63.5	44.88	52.5667	54.8983	56.19	45.3317	24.2017	95.105
2016	证监会行业	水的生产和供应业	1	0	0	0	0	0	0	1	0	0	0	40.63	40.63	40.63	33.95	52.38	37.05	7.71	90
2016	证监会行业	汽车制造业	11	0	0	0	1	2	5	3	0	0	0	55.5	44.25	48.5473	45.28	55.5245	45.0564	22.2745	87.9555
2016	证监会行业	煤炭开采和洗选业	6	0	0	0	1	1	1	1	2	0	0	57.88	36.5	46.1483	41.6917	52.9567	45.26	24.1667	79.1167
2016	证监会行业	燃气生产和供应业	1	0	0	0	0	0	1	0	0	0	0	45.5	45.5	45.5	34.26	54.37	51.79	17.5	87.5
2016	证监会行业	生态保护和环境治理业	2	0	0	0	0	0	2	0	0	0	0	46.63	45.38	46.005	47.765	51.705	38.62	16.46	90.315
2016	证监会行业	电信、广播电视和卫星传输服务	6	0	0	0	0	1	2	3	0	0	0	52.25	41.13	45.9183	47.0083	49.7483	40.675	14.445	93.1283
2016	证监会行业	电力、热力生产和供应业	16	0	0	0	2	3	5	5	1	0	0	62.63	36.38	47.5969	44.8306	54.9844	43.2763	19.9231	89.1019
2016	证监会行业	电气机械和器材制造业	9	0	0	0	0	1	5	2	1	0	0	52.13	38.13	45.5578	46.9278	50.38	38.2667	15.3244	90.9022
2016	证监会行业	畜牧业	2	0	0	0	0	1	1	0	0	0	0	54.25	46	50.125	46.055	55.22	49.56	20.005	95.31
2016	证监会行业	石油加工、炼焦及核燃料加工业	1	0	0	0	0	1	0	0	0	0	0	53.13	53.13	53.13	48.05	54.1	58.93	32.92	83.44
2016	证监会行业	石油和天然气开采业	3	0	0	0	0	0	2	1	0	0	0	48.38	40.75	45.0867	39.69	48.12	49.28	31.9467	64.7933
2016	证监会行业	租赁业	1	0	0	0	0	0	1	0	0	0	0	45.5	45.5	45.5	46.83	54.78	35.14	12.5	95
2016	证监会行业	纺织服装、服饰业	2	0	0	0	0	0	1	1	0	0	0	45.75	42.88	44.315	42.105	48.895	41.74	12.92	91.405
2016	证监会行业	综合	3	0	0	0	0	0	0	3	0	0	0	45	43	44.3333	44.15	51.24	37.8167	10.4867	95.1033
2016	证监会行业	航空运输业	7	0	0	0	1	3	1	2	0	0	0	56.88	40.63	49.02	55.0671	49.0529	41.2543	23.0671	87.9486
2016	证监会行业	计算机、通信和其他电子设备制造业	24	0	0	0	3	3	9	8	1	0	0	62.63	39	47.8554	47.3142	53.2983	42.3679	16.7896	94.4529
2016	证监会行业	货币金融服务	16	0	0	0	3	7	6	0	0	0	0	58.75	45.75	51.98	55.1581	52.3906	48.6638	31.3681	82.8931
2016	证监会行业	资本市场服务	26	0	0	0	0	5	10	11	0	0	0	53	40.88	46.0312	47.2538	53.0404	38.0019	15.8492	91.2977
2016	证监会行业	软件和信息技术服务业	16	0	0	0	0	0	10	6	0	0	0	49.63	40.88	45.6281	47.4475	49.9288	39.0613	11.4856	96.8363
2016	证监会行业	通用设备制造业	5	0	0	0	0	2	3	0	0	0	0	53.63	47.75	50.202	49.998	56.746	43.362	21.25	93.626
2016	证监会行业	酒、饮料和精制茶制造业	7	0	0	0	0	2	2	3	0	0	0	51.88	40.63	46.5386	43.0943	51.3114	45.4086	21.1614	84.6
2016	证监会行业	金属制品业	2	0	0	0	0	0	1	1	0	0	0	48.13	44.25	46.19	38.15	54.665	47.095	18.54	87.655
2016	证监会行业	铁路、船舶、航空航天和其他运输设备制造业	11	0	0	0	1	3	0	6	1	0	0	55.63	38.88	46.1055	42.4609	55.6291	40.7145	15.7773	91.5918
2016	证监会行业	铁路运输业	2	0	0	0	0	1	1	0	0	0	0	50.63	46.5	48.565	47.8	48.16	50	19.48	92.19
2016	证监会行业	零售业	7	0	0	0	0	2	1	3	1	0	0	53	37.75	45.4843	48.88	50.1629	37.4729	17.5014	87.4557
2016	证监会行业	非金属矿物制品业	3	0	0	0	0	0	1	2	0	0	0	46.75	43.63	44.71	38.53	53.11	43.1567	15.9733	87.8133
2016	证监会行业	食品制造业	3	0	0	0	0	1	1	1	0	0	0	53.5	41.63	47.1267	40.4567	53.9233	47.9167	18.1233	90.6267
2016	证监会行业	黑色金属冶炼和压延加工业	6	0	0	0	2	1	2	1	0	0	0	59.88	43.25	50.65	49.9983	54.6667	46.725	25.6967	88.0733
2016	证监会行业	（已退市）	1	0	0	0	0	0	0	0	1	0	0	40	40	40	36.04	48.51	35.27	16.25	75.63
2017	证监会行业	专用设备制造业	6	0	0	0	0	1	3	2	0	0	0	50.38	41	45.71	42.9317	55.62	38.7217	16.39	89.69
2017	证监会行业	互联网和相关服务	10	0	0	0	0	0	3	6	1	0	0	46.38	35.63	43.277	45.986	46.667	36.667	10.19	92.908
2017	证监会行业	保险业	5	0	0	0	1	2	1	1	0	0	0	55.5	44.13	50.502	51.586	55.662	44.42	25.752	87.626
2017	证监会行业	其他金融业	3	0	0	0	0	0	2	1	0	0	0	48.38	41.5	45.67	46.6933	54.0433	36.4733	12.64	95.2067
2017	证监会行业	农业	1	0	0	0	0	0	1	0	0	0	0	46.63	46.63	46.63	47.37	55.6	35.09	15.83	92.81
2017	证监会行业	农副食品加工业	4	0	0	0	0	1	2	0	1	0	0	53	38.88	47.2825	38.8175	55.1475	49.2175	19.635	88.7525
2017	证监会行业	化学原料及化学制品制造业	7	0	0	0	0	1	2	1	3	0	0	51.88	37.38	43.52	43.5071	48.0271	38.1386	18.2743	81.3843
2017	证监会行业	医药制造业	17	0	0	0	2	1	9	5	0	0	0	62.38	41.25	48.2594	51.18	52.24	40.6071	19.8665	90.8465
2017	证监会行业	卫生	2	0	0	0	0	0	0	1	1	0	0	44.38	39.13	41.755	43.18	45.715	35.935	14.79	82.185
2017	证监会行业	商务服务业	4	0	0	0	0	0	1	2	1	0	0	45.13	40	42.44	49.7225	44.2225	33.395	10.9375	89.6875
2017	证监会行业	土木工程建筑业	13	0	0	0	1	5	2	4	1	0	0	56.75	36.25	47.8492	46.9569	50.5369	45.9677	24.1362	83.4138
2017	证监会行业	家具制造业	2	0	0	0	0	0	0	2	0	0	0	42.63	41.13	41.88	40.79	46.69	37.5	6.875	94.375
2017	证监会行业	广播、电视、电影和影视录音制作业	6	0	0	0	0	0	2	4	0	0	0	49.38	41.25	44.0017	49.13	50	32.96	10	95
2017	证监会行业	建筑装饰和其他建筑业	1	0	0	0	0	0	0	1	0	0	0	43.75	43.75	43.75	42.31	50.76	37.5	12.71	90.31
2017	证监会行业	开采辅助活动	2	0	0	0	1	0	1	0	0	0	0	55.63	49.25	52.44	51.88	61.895	43.105	24.9	93.75
2017	证监会行业	房地产业	18	0	0	0	1	1	6	8	2	0	0	55.38	36.5	44.9122	43.5789	50.0678	41.3472	16.0872	88.1428
2017	证监会行业	批发业	3	0	0	0	0	1	1	1	0	0	0	50.5	44.88	47.0867	51.6167	51.3867	38.3067	15	95.2067
2017	证监会行业	文化艺术业	1	0	0	0	0	0	0	1	0	0	0	43.88	43.88	43.88	45.9	46.97	38.81	11.04	93.13
2017	证监会行业	文教、工美、体育和娱乐用品制造业	1	0	0	0	0	0	0	1	0	0	0	44.88	44.88	44.88	44.08	47.79	42.41	9.79	97.5
2017	证监会行业	新闻和出版业	2	0	0	0	0	0	0	2	0	0	0	44.63	44.25	44.44	47.945	51.135	34.33	10.73	95
2017	证监会行业	有色金属冶炼和压延加工业	11	0	0	0	1	2	4	4	0	0	0	60.25	40.63	47.0827	44.3327	50.5764	46.6736	20.7	86.6491
2017	证监会行业	有色金属矿采选业	5	0	0	0	0	1	2	2	0	0	0	52.25	40.63	46.178	42.276	53.226	44.31	21.874	82.626
2017	证监会行业	橡胶和塑料制品业	3	0	0	0	0	0	0	2	1	0	0	42.88	38.5	41.2933	44.37	46.3967	30.9533	9.3767	89.17
2017	证监会行业	水上运输业	6	0	0	0	3	0	3	0	0	0	0	61.5	45.5	53.7717	55.46	59.2517	45.1867	24.3417	97.9167
2017	证监会行业	水的生产和供应业	1	0	0	0	0	0	0	1	0	0	0	40.63	40.63	40.63	33.95	52.38	37.05	7.71	90
2017	证监会行业	汽车制造业	10	0	0	0	0	4	4	2	0	0	0	54.38	42.13	48.602	46.123	55.424	44.211	24	85.501
2017	证监会行业	煤炭开采和洗选业	6	0	0	0	1	1	1	2	1	0	0	59.5	38.88	46.7533	42.1	52.9583	46.7683	26.4933	77.1367
2017	证监会行业	生态保护和环境治理业	2	0	0	0	0	0	1	1	0	0	0	46.13	44.75	45.44	43.285	53.03	40.11	16.46	88.905
2017	证监会行业	电信、广播电视和卫星传输服务	6	0	0	0	1	0	2	3	0	0	0	55.38	42.25	46.44	47.7133	50.6317	40.6083	16.2833	91.67
2017	证监会行业	电力、热力生产和供应业	10	0	0	0	0	4	3	3	0	0	0	54.75	41	48.377	45.277	54.841	45.58	22.667	86.938
2017	证监会行业	电气机械和器材制造业	9	0	0	0	0	1	4	4	0	0	0	53.5	40.88	45.4744	47.8622	48.9433	38.41	15.3011	90.7289
2017	证监会行业	畜牧业	2	0	0	0	0	1	1	0	0	0	0	54.25	46.63	50.44	46.545	56.16	48.905	22.815	91.88
2017	证监会行业	石油加工、炼焦及核燃料加工业	2	0	0	0	0	1	0	1	0	0	0	53.63	41.38	47.505	40.425	51.305	52.68	25.415	80.625
2017	证监会行业	石油和天然气开采业	3	0	0	0	0	1	1	1	0	0	0	50.88	44.88	47.38	44.27	49.73	49.14	34.5133	66.6667
2017	证监会行业	租赁业	1	0	0	0	0	0	0	1	0	0	0	44.13	44.13	44.13	44.44	57.35	30.8	10.21	95
2017	证监会行业	纺织服装、服饰业	1	0	0	0	0	0	0	1	0	0	0	44.5	44.5	44.5	46.05	48.53	37.5	10.83	95
2017	证监会行业	综合	2	0	0	0	0	0	1	1	0	0	0	46.13	44.38	45.255	42.315	50.76	39.365	14.48	91.405
2017	证监会行业	航空运输业	6	0	0	0	1	3	0	2	0	0	0	59.63	43.75	51.1267	57.94	50.2433	43.465	27.5017	86.5617
2017	证监会行业	计算机、通信和其他电子设备制造业	25	0	0	0	5	2	10	8	0	0	0	64	40.75	48.3724	47.9212	54.3328	42.1724	17.9844	93.9496
2017	证监会行业	货币金融服务	21	0	0	0	5	10	4	2	0	0	0	61	44.13	51.8352	54.5352	53.3262	47.8943	29.5938	85.1952
2017	证监会行业	资本市场服务	29	0	0	0	1	6	13	9	0	0	0	56.25	42.38	47.3124	48.1124	53.4872	40.4914	18.2766	90.8641
2017	证监会行业	软件和信息技术服务业	13	0	0	0	0	1	9	3	0	0	0	50.63	41.13	46.2346	48.0769	49.8554	40.3538	12.8692	96.2738
2017	证监会行业	通用设备制造业	4	0	0	0	2	0	2	0	0	0	0	57.5	47.38	52.5025	52.2125	60.8125	43.8575	25.7275	92.6575
2017	证监会行业	造纸及纸制品业	1	0	0	0	0	0	0	1	0	0	0	44.13	44.13	44.13	42.11	52.94	36.16	11.88	92.5
2017	证监会行业	邮政业	3	0	0	0	0	0	0	1	2	0	0	44.38	37.88	40.2133	42.7933	38.48	38.9367	13.1933	80.73
2017	证监会行业	酒、饮料和精制茶制造业	4	0	0	0	0	2	1	1	0	0	0	54	44.63	49.065	48.6	51.565	46.6525	23.02	88.1275
2017	证监会行业	铁路、船舶、航空航天和其他运输设备制造业	11	0	0	0	1	3	2	4	1	0	0	61.75	37.88	47.23	43.6136	55.7364	42.9073	18.9973	89.5745
2017	证监会行业	铁路运输业	2	0	0	0	0	1	1	0	0	0	0	53.25	46	49.625	51.015	51.475	45.69	22.295	90.625
2017	证监会行业	零售业	7	0	0	0	1	1	2	3	0	0	0	55.75	43.25	47.61	49.7857	50.5957	42.4843	19.1071	90.3571
2017	证监会行业	非金属矿物制品业	4	0	0	0	0	0	3	1	0	0	0	48.88	41.75	46.345	42.8575	52.1475	44.1975	18.96	87.4225
2017	证监会行业	食品制造业	1	0	0	0	1	0	0	0	0	0	0	55.75	55.75	55.75	48.03	68.01	51.34	33.96	88.44
2017	证监会行业	黑色金属冶炼和压延加工业	5	0	0	0	0	2	2	1	0	0	0	54.75	40.5	48.652	51.232	50.824	42.5	25.792	82.938
2018	证监会行业	专用设备制造业	5	0	0	0	0	1	3	1	0	0	0	50.75	40.88	46.652	43.86	54.286	42.154	18.874	88.312
2018	证监会行业	互联网和相关服务	7	0	0	0	0	0	4	3	0	0	0	49	40.5	45.4129	46.3271	47.9429	41.7243	13.7814	92.8586
2018	证监会行业	保险业	5	0	0	0	2	2	1	0	0	0	0	58.13	47.75	53.052	54.286	59.264	45.798	31.918	84.75
2018	证监会行业	其他金融业	3	0	0	0	0	1	2	0	0	0	0	51.13	45.5	47.7533	44.9733	53.43	44.6867	17.0867	93.75
2018	证监会行业	农副食品加工业	5	0	0	0	0	1	1	2	1	0	0	51.38	39.13	44.904	34.21	57.058	44.644	17.168	86.502
2018	证监会行业	化学原料及化学制品制造业	10	0	0	0	2	1	4	2	1	0	0	58.88	39.38	48.241	47.111	53.096	43.974	21.5	88.345
2018	证监会行业	化学纤维制造业	3	0	0	0	0	0	1	2	0	0	0	46	43.38	44.7933	43.6133	50.87	39.1367	10.6233	96.0433
2018	证监会行业	医药制造业	23	0	0	1	3	8	9	2	0	0	0	65.38	42.75	49.8826	53.0609	52.6287	43.267	21.8122	91.9843
2018	证监会行业	卫生	2	0	0	0	0	0	1	0	1	0	0	47.63	39.25	43.44	41.665	44.82	43.75	20.415	77.97
2018	证监会行业	商务服务业	4	0	0	0	1	0	0	3	0	0	0	56.25	41.5	46.565	51.8675	45.74	42.0725	19.17	87.6575
2018	证监会行业	土木工程建筑业	13	0	0	0	1	6	3	3	0	0	0	55.88	40.75	49.2246	46.5977	52.6808	48.7985	26.2992	83.6062
2018	证监会行业	家具制造业	2	0	0	0	0	0	2	0	0	0	0	49.13	45.75	47.44	45.72	50.185	46.425	15.31	95.625
2018	证监会行业	广播、电视、电影和影视录音制作业	4	0	0	0	0	0	1	3	0	0	0	45.75	42.75	44.0325	48.695	48.5775	34.8875	9.585	95.7025
2018	证监会行业	建筑装饰和其他建筑业	1	0	0	0	0	0	1	0	0	0	0	47.38	47.38	47.38	44.87	54.17	42.86	15.63	95
2018	证监会行业	开采辅助活动	3	0	0	0	1	1	1	0	0	0	0	63	45.75	53.6667	53.96	57.66	48.9933	27.2933	93.23
2018	证监会行业	房地产业	16	0	0	0	0	2	6	7	1	0	0	53.38	36.63	46.0263	44.0744	50.4019	44.0313	17.8663	88.2619
2018	证监会行业	批发业	3	0	0	0	0	0	3	0	0	0	0	49.88	47.63	48.7133	52.3633	48.4867	45.2733	18.7533	93.6467
2018	证监会行业	文化艺术业	1	0	0	0	0	0	1	0	0	0	0	46.38	46.38	46.38	48.88	46.97	43.28	11.88	98.13
2018	证监会行业	新闻和出版业	1	0	0	0	0	0	1	0	0	0	0	48.13	48.13	48.13	51.12	50.76	42.54	13.54	100
2018	证监会行业	有色金属冶炼和压延加工业	11	0	0	0	2	1	5	3	0	0	0	61.88	40.88	48.3318	46.9018	53.3918	44.2382	22.2727	87.4155
2018	证监会行业	有色金属矿采选业	5	0	0	0	1	1	2	1	0	0	0	57.88	44.25	49.952	47.25	56.29	46.896	26.918	84.502
2018	证监会行业	橡胶和塑料制品业	1	0	0	0	0	0	0	1	0	0	0	44.88	44.88	44.88	43.18	51.49	39.29	14.79	90
2018	证监会行业	水上运输业	5	0	0	0	3	0	2	0	0	0	0	63.88	48.13	56.204	57.162	58.31	52.5	28.668	97.5
2018	证监会行业	水的生产和供应业	1	0	0	0	0	0	1	0	0	0	0	45.13	45.13	45.13	30.86	61.11	47.77	21.88	80
2018	证监会行业	汽车制造业	12	0	0	0	3	1	4	4	0	0	0	56	42.25	49.0742	46.8467	56.185	44.0058	24.8617	85.3908
2018	证监会行业	煤炭开采和洗选业	6	0	0	1	1	0	1	2	1	0	0	66.75	36.63	49.4617	42.9683	56.0483	51.3633	30.9033	77.2917
2018	证监会行业	生态保护和环境治理业	2	0	0	0	0	0	1	1	0	0	0	45.75	44.63	45.19	43.47	51.515	40.67	18.335	85.47
2018	证监会行业	电信、广播电视和卫星传输服务	4	0	0	0	0	1	2	1	0	0	0	54.88	41.5	48.7525	50.4425	54.3525	40.9725	21.5625	89.5325
2018	证监会行业	电力、热力生产和供应业	11	0	0	0	1	7	1	2	0	0	0	56	43.13	50.5591	45.3709	57.6845	50.04	25.2082	88.58
2018	证监会行业	电气机械和器材制造业	10	0	0	0	0	2	6	1	1	0	0	52.38	36.88	46.265	48.617	50.871	37.931	16.584	90.782
2018	证监会行业	畜牧业	1	0	0	0	1	0	0	0	0	0	0	56	56	56	51.64	60.82	56.14	31.25	93.13
2018	证监会行业	石油加工、炼焦及核燃料加工业	2	0	0	0	1	0	0	1	0	0	0	59.88	43.13	51.505	48.865	53.355	52.9	31.355	81.72
2018	证监会行业	石油和天然气开采业	2	0	0	0	0	0	1	1	0	0	0	47.13	44.5	45.815	37.815	50.405	51.94	43.02	50.005
2018	证监会行业	研究和试验发展	1	0	0	0	0	0	0	0	1	0	0	39.38	39.38	39.38	46.64	44.7	26.87	11.46	81.25
2018	证监会行业	租赁业	1	0	0	0	0	0	1	0	0	0	0	46.88	46.88	46.88	44.44	59.56	36.59	11.46	100
2018	证监会行业	纺织服装、服饰业	2	0	0	0	0	0	2	0	0	0	0	46.25	45.38	45.815	43.095	49.815	44.645	15.42	91.405
2018	证监会行业	航空运输业	7	0	0	0	1	2	3	1	0	0	0	59.38	42.88	49.9671	56.5143	49.5286	42.1186	25.5371	86.6071
2018	证监会行业	计算机、通信和其他电子设备制造业	24	0	0	1	3	5	11	4	0	0	0	65.13	43.25	50.1225	49.2483	54.6092	46.2467	20.2267	94.9608
2018	证监会行业	货币金融服务	21	0	0	0	5	12	4	0	0	0	0	58.63	47.25	52.6571	55.9719	54.6386	47.6705	32.1933	83.35
2018	证监会行业	资本市场服务	28	0	0	0	4	8	10	6	0	0	0	57.5	41.13	48.9943	50.68	55.3964	41.1364	21.4893	90.2468
2018	证监会行业	软件和信息技术服务业	8	0	0	0	0	1	5	2	0	0	0	51.63	40.13	47.0025	49.8225	50.5213	40.13	14.09	96.3675
2018	证监会行业	通用设备制造业	4	0	0	0	2	1	1	0	0	0	0	61	47	53.815	52.215	60.4175	48.815	27.19	93.75
2018	证监会行业	道路运输业	1	0	0	0	0	0	0	1	0	0	0	44.63	44.63	44.63	44.93	48.53	39.66	7.71	100
2018	证监会行业	邮政业	4	0	0	0	0	0	0	2	2	0	0	43	38.63	40.5025	46.3675	37.2225	36.8525	14.065	80.155
2018	证监会行业	酒、饮料和精制茶制造业	6	0	0	0	0	2	3	1	0	0	0	54	44.38	49.295	46.765	53.9817	47.025	21.5633	90.8867
2018	证监会行业	金属制品业	1	0	0	0	0	0	0	1	0	0	0	43.63	43.63	43.63	51.62	38.06	39.29	19.38	80
2018	证监会行业	铁路、船舶、航空航天和其他运输设备制造业	8	0	0	0	1	3	3	0	1	0	0	58.25	36.13	48.9863	44.3438	55.605	48.115	22.97	88.0075
2018	证监会行业	铁路运输业	2	0	0	0	1	0	1	0	0	0	0	56.5	47.25	51.875	49.83	53.125	53.015	25.42	91.565
2018	证监会行业	零售业	6	0	0	0	1	2	3	0	0	0	0	59.13	46.63	51.3167	54.9133	49.3683	49.6283	26.1467	89.0617
2018	证监会行业	非金属矿物制品业	8	0	0	0	1	2	4	1	0	0	0	59.38	43.38	49.955	44.3575	55.9238	50.5025	22.6575	90.9
2018	证监会行业	食品与主要用品零售	1	0	0	0	0	0	0	1	0	0	0	44.5	44.5	44.5	45.52	41.67	46.27	23.13	76.56
2018	证监会行业	食品制造业	2	0	0	0	1	0	0	1	0	0	0	55.63	45	50.315	47.205	56.435	47.095	22.71	91.72
2018	证监会行业	黑色金属冶炼和压延加工业	5	0	0	0	1	2	1	0	1	0	0	57.63	38.75	48.852	50.326	51.342	43.838	26.752	82.002
2019	证监会行业	专用设备制造业	5	0	0	0	0	2	2	1	0	0	0	52.75	43	47.776	46.834	53.968	42.328	19.71	89.876
2019	证监会行业	互联网和相关服务	5	0	0	0	0	0	5	0	0	0	0	49.75	45.38	46.678	48.026	51.744	39.842	14.916	94.312
2019	证监会行业	保险业	6	0	0	0	4	1	1	0	0	0	0	60.75	46.5	55.5217	59.5233	61.0283	46.4383	35.3133	85.8333
2019	证监会行业	信息传输、软件和信息技术服务业-电信、广播电视和卫星传输服务	1	0	0	0	0	0	0	1	0	0	0	45	45	45	45.07	48.48	41.27	9.58	98.13
2019	证监会行业	其他金融业	3	0	0	0	0	0	2	1	0	0	0	47.25	43.5	45.5433	43.7833	54.1667	38.6467	14.5133	92.0833
2019	证监会行业	农副食品加工业	4	0	0	0	0	2	2	0	0	0	0	53.75	45.25	48.845	39.4725	57.6275	50.895	24.01	86.095
2019	证监会行业	制造业-化学原料及化学制品制造业	1	0	0	0	0	0	0	1	0	0	0	42.63	42.63	42.63	39.61	48.13	40.18	10.83	90.31
2019	证监会行业	制造业-文教、工美、体育和娱乐用品制造业	1	0	0	0	0	1	0	0	0	0	0	51.75	51.75	51.75	49.01	52.57	54.46	21.04	97.81
2019	证监会行业	制造业-石油加工、炼焦及核燃料加工业	1	0	0	0	0	0	0	1	0	0	0	42.63	42.63	42.63	37.34	41.79	50.89	17.08	80.94
2019	证监会行业	制造业-计算机、通信和其他电子设备制造业	4	0	0	0	0	1	3	0	0	0	0	54	45.5	48.47	48.0275	53.125	43.75	14.9475	98.75
2019	证监会行业	化学原料及化学制品制造业	8	0	0	0	3	0	3	2	0	0	0	63.5	42.75	50.7675	51.3388	55.6438	44.1413	25.0788	89.2975
2019	证监会行业	化学纤维制造业	3	0	0	0	0	1	1	1	0	0	0	54.38	43.5	47.8767	48.4867	51.9933	42.1167	17.0133	94.1667
2019	证监会行业	医药制造业	22	0	0	1	2	7	10	2	0	0	0	66.25	42.38	51.1732	54.2259	53.6982	45.0877	23.9027	92.0741
2019	证监会行业	卫生	2	0	0	0	0	0	1	0	1	0	0	49.63	38.88	44.255	44.32	44.105	44.335	21.77	77.97
2019	证监会行业	卫生和社会工作-卫生	1	0	0	0	0	0	1	0	0	0	0	46.25	46.25	46.25	48.48	46.43	43.75	10.42	100
2019	证监会行业	商务服务业	5	0	0	0	0	1	2	2	0	0	0	52.25	42.75	46.002	52.016	45.68	40.298	18.876	86.69
2019	证监会行业	土木工程建筑业	10	0	0	0	0	4	4	2	0	0	0	53.63	40.75	48.565	46.956	49.773	49.376	28.375	78.844
2019	证监会行业	家具制造业	1	0	0	0	0	0	0	1	0	0	0	44.63	44.63	44.63	42.11	48.9	42.86	13.96	90.63
2019	证监会行业	广播、电视、电影和影视录音制作业	3	0	0	0	0	0	3	0	0	0	0	48.88	45.25	46.8767	50.1233	49.9967	40.5433	13.1267	97.5
2019	证监会行业	建筑装饰和其他建筑业	1	0	0	0	0	0	1	0	0	0	0	45.13	45.13	45.13	43.27	50.38	41.52	16.25	88.44
2019	证监会行业	开采辅助活动	3	0	0	0	1	1	1	0	0	0	0	62.88	47	53.92	53.44	57.5267	50.72	27.1533	94.0633
2019	证监会行业	房地产业	16	0	0	0	0	2	6	6	2	0	0	52.63	37.88	45.2063	44.2375	49.27	42.2881	18.4113	85.3925
2019	证监会行业	房地产业-房地产业	1	0	0	0	0	1	0	0	0	0	0	53.13	53.13	53.13	50.65	56.05	53.28	21.88	100
2019	证监会行业	批发业	3	0	0	0	0	1	1	1	0	0	0	50.5	44.25	46.96	48.88	47.73	44.2767	20.21	87.0833
2019	证监会行业	批发和零售业-零售业	1	0	0	0	0	1	0	0	0	0	0	50.13	50.13	50.13	48.88	53.79	47.76	18.54	97.5
2019	证监会行业	教育-教育	1	0	0	0	0	0	1	0	0	0	0	47.88	47.88	47.88	51.12	50.76	41.79	14.79	97.5
2019	证监会行业	文化艺术业	2	0	0	0	0	0	2	0	0	0	0	48	46.88	47.44	47.385	50.19	44.775	14.065	97.5
2019	证监会行业	有色金属冶炼和压延加工业	10	0	0	0	2	4	3	1	0	0	0	63.5	42.5	51.865	52.76	54.028	48.037	28.73	86.563
2019	证监会行业	有色金属矿采选业	4	0	0	0	2	2	0	0	0	0	0	60.5	50.25	56.5025	58.28	60.8875	49.3525	38.44	83.595
2019	证监会行业	水上运输业	5	0	0	0	3	1	1	0	0	0	0	59.25	46.88	54.228	55.138	58.896	47.588	28.5	92.814
2019	证监会行业	汽车制造业	11	0	0	0	2	4	4	1	0	0	0	57.75	43.38	51.1618	50.5527	57.4136	44.8564	28.1045	85.74
2019	证监会行业	煤炭开采和洗选业	4	0	0	1	0	2	1	0	0	0	0	66.75	49.38	55.815	52.4975	59.98	55.9275	39.79	79.845
2019	证监会行业	生态保护和环境治理业	1	0	0	0	0	0	1	0	0	0	0	46.63	46.63	46.63	44.78	53.41	41.79	19.17	87.81
2019	证监会行业	电信、广播电视和卫星传输服务	2	0	0	0	1	1	0	0	0	0	0	60.13	54.38	57.255	60.565	63.255	47.22	33.96	92.19
2019	证监会行业	电力、热力生产和供应业	9	0	0	0	4	3	2	0	0	0	0	61.88	45.38	54.4044	51.1322	59.1711	53.77	29.7922	91.32
2019	证监会行业	电气机械和器材制造业	9	0	0	0	0	2	6	1	0	0	0	54	44.88	47.7667	49.4878	52.9467	39.6089	19.2144	90.5911
2019	证监会行业	畜牧业	2	0	0	0	1	0	1	0	0	0	0	56	48.5	52.25	48.025	60.635	48.025	27.395	89.535
2019	证监会行业	石油加工、炼焦及核燃料加工业	1	0	0	0	1	0	0	0	0	0	0	61.88	61.88	61.88	60.06	67.16	58.04	49.79	80
2019	证监会行业	石油和天然气开采业	2	0	0	0	0	2	0	0	0	0	0	52.63	52.5	52.565	51.41	49.8	57.115	51.045	54.845
2019	证监会行业	研究和试验发展	1	0	0	0	1	0	0	0	0	0	0	57.75	57.75	57.75	66.79	62.88	43.66	35.83	90.63
2019	证监会行业	租赁业	1	0	0	0	0	0	1	0	0	0	0	49.75	49.75	49.75	50.4	57.72	41.3	16.25	100
2019	证监会行业	纺织服装、服饰业	1	0	0	0	0	0	1	0	0	0	0	48.75	48.75	48.75	46.05	53.31	46.88	17.71	95.31
2019	证监会行业	航空运输业	7	0	0	0	3	1	2	1	0	0	0	58	44.5	51.4486	57.3843	51.9443	43.29	29.0186	85.09
2019	证监会行业	计算机、通信和其他电子设备制造业	26	0	0	1	6	6	11	2	0	0	0	67.63	43.5	51.5315	51.0881	57.1096	45.755	23.6146	93.4015
2019	证监会行业	货币金融服务	22	0	0	0	6	10	6	0	0	0	0	60.63	47.75	53.5714	56.0791	55.7986	49.0786	33.3159	83.95
2019	证监会行业	资本市场服务	27	0	0	0	9	5	10	3	0	0	0	58.5	44.38	51.1504	51.8967	57.9522	43.76	24.8689	90.5667
2019	证监会行业	软件和信息技术服务业	9	0	0	0	0	2	6	1	0	0	0	50.5	40.88	47.7522	50.2722	51.9378	40.52	15.4633	96.18
2019	证监会行业	通用设备制造业	4	0	0	1	1	0	2	0	0	0	0	65.25	48.63	54.7225	56.96	61.2125	44.6125	29.3225	92.815
2019	证监会行业	邮政业	4	0	0	0	0	0	0	3	1	0	0	43	38.63	41.19	47.975	36.305	38.255	16.0425	78.9075
2019	证监会行业	酒、饮料和精制茶制造业	7	0	0	0	0	2	4	1	0	0	0	51.63	43.75	48.0386	45.7229	53.4657	44.58	20.18	89.8214
2019	证监会行业	采矿业-开采辅助活动	1	0	0	0	0	0	1	0	0	0	0	48.88	48.88	48.88	46.56	56.85	43.53	21.25	90.31
2019	证监会行业	金属制品业	1	0	0	0	0	0	0	1	0	0	0	41.13	41.13	41.13	46.43	37.69	37.95	15.42	79.69
2019	证监会行业	金融业-货币金融服务	2	0	0	0	0	1	1	0	0	0	0	52.25	49.13	50.69	51.985	54.96	45.29	21.77	94.06
2019	证监会行业	金融业-资本市场服务	1	0	0	0	0	0	1	0	0	0	0	49.75	49.75	49.75	44.44	50	54.35	19.17	95.63
2019	证监会行业	铁路、船舶、航空航天和其他运输设备制造业	8	0	0	0	2	3	2	1	0	0	0	56.38	41.38	50.3788	46.4	57.0925	48.49	24.3213	89.4525
2019	证监会行业	铁路运输业	1	0	0	0	0	1	0	0	0	0	0	50.5	50.5	50.5	54.73	49.63	46.12	25.42	88.13
2019	证监会行业	零售业	5	0	0	0	1	2	2	0	0	0	0	56.13	47.88	51.728	55.972	49.47	49.702	28.458	86.624
2019	证监会行业	非金属矿物制品业	8	0	0	0	2	2	4	0	0	0	0	60.5	45.13	51.8925	49.96	53.4075	52.7338	27.8663	87.93
2019	证监会行业	食品制造业	2	0	0	0	1	0	0	1	0	0	0	55.88	43.88	49.88	49.345	55.145	44.195	25.94	85.785
2019	证监会行业	黑色金属冶炼和压延加工业	4	0	0	0	1	2	0	1	0	0	0	57	44	51.0625	50.245	58.3	43.5275	31.2	80.86
2015	融绿一级行业	交通运输、仓储和邮政业	17	0	0	0	3	3	9	1	1	0	0	64.5	38.75	49.6712	52.5035	51.0594	44.4218	20.2588	93.7876
2015	融绿一级行业	信息传输、软件和信息技术服务业	23	0	0	0	0	1	12	9	1	0	0	54.5	38.88	45.5243	47.413	49.5548	39.1652	12.093	95.6665
2015	融绿一级行业	其他服务业	27	0	0	0	1	1	10	13	2	0	0	55.25	36.5	44.5244	49.8896	49.3685	34.3837	12.5163	92.5348
2015	融绿一级行业	农、林、牧、渔业	2	0	0	0	0	0	2	0	0	0	0	48.25	47.88	48.065	45.065	50.935	48.68	14.895	97.815
2015	融绿一级行业	制造业	1	0	0	0	0	0	1	0	0	0	0	50	50	50	45.78	45.52	61.16	27.5	83.75
2015	融绿一级行业	医药制造业	20	0	0	0	1	3	12	4	0	0	0	62.13	43	48.1025	50.2115	51.68	41.815	17.8545	93.4695
2015	融绿一级行业	卫生	1	0	0	0	0	0	0	1	0	0	0	43.5	43.5	43.5	53.03	40	37.5	11.67	91.25
2015	融绿一级行业	原材料加工制造业	30	0	0	0	2	5	8	12	3	0	0	58.13	37.38	46.211	45.022	50.311	42.931	18.5983	87.6263
2015	融绿一级行业	建筑业	14	0	0	0	1	3	5	2	3	0	0	55.38	30.88	45.6993	47.5957	47.2943	41.1671	19.495	85.0007
2015	融绿一级行业	房地产业	13	0	0	0	0	2	4	5	2	0	0	52.5	38.75	44.6369	45.4538	48.2331	39.9423	14.6308	89.64
2015	融绿一级行业	木材、纺织、服饰和文教用品制造业	4	0	0	0	0	0	2	2	0	0	0	49.25	44.25	45.845	44.405	47.7925	45.4225	13.8575	93.8275
2015	融绿一级行业	水利、环境和公共设施管理业	2	0	0	0	0	0	1	1	0	0	0	46.63	44.75	45.69	47.765	51.325	38.06	15.935	90.315
2015	融绿一级行业	汽车制造业	12	0	0	0	0	5	6	1	0	0	0	53.63	44.38	49.3883	47.0083	55.0975	46.1275	22.2742	90.0525
2015	融绿一级行业	电力、热力、燃气及水的生产和供应业	20	0	0	0	0	5	8	6	1	0	0	54.63	37.25	46.689	42.886	54.107	43.84	16.333	92.2195
2015	融绿一级行业	电气机械和器材、计算机、通信和其他电子设备制造业	27	0	0	1	3	3	13	7	0	0	0	65.13	40.75	48.5948	49.0985	53.0152	42.8959	18.1652	94.2367
2015	融绿一级行业	运输设备和通用专用设备制造业	21	0	0	0	0	3	9	9	0	0	0	53.75	40.75	46.7948	44.4081	55.2338	40.8652	16.1824	92.7086
2015	融绿一级行业	采矿业	22	0	0	0	3	1	7	9	2	0	0	59.88	39.25	46.4005	43.285	51.9791	44.7886	21.9614	83.055
2015	融绿一级行业	金融业	43	0	0	0	3	11	19	10	0	0	0	57.63	40.25	48.4158	50.4435	52.47	42.5598	21.9391	88.126
2015	融绿一级行业	食品饮料制造业	16	0	0	0	0	3	4	8	1	0	0	54.75	39.13	45.1894	42.0019	49.9306	43.7506	17.3831	86.8963
2016	融绿一级行业	交通运输、仓储和邮政业	15	0	0	0	4	4	4	3	0	0	0	63.5	40.63	50.378	54.0307	51.7887	44.0513	23.0427	91.3767
2016	融绿一级行业	信息传输、软件和信息技术服务业	30	0	0	0	0	1	15	13	1	0	0	52.25	37	45.111	46.9607	49.4063	38.5183	11.7507	95.1467
2016	融绿一级行业	其他服务业	32	0	0	0	1	2	9	18	2	0	0	56.75	37.75	45.2206	49.2884	49.9644	36.4747	13.6653	92.5491
2016	融绿一级行业	农、林、牧、渔业	3	0	0	0	0	1	2	0	0	0	0	54.25	46	49.5	47.37	55.47	45.32	18.9633	95.31
2016	融绿一级行业	制造业	1	0	0	0	0	1	0	0	0	0	0	53.13	53.13	53.13	48.05	54.1	58.93	32.92	83.44
2016	融绿一级行业	医药制造业	18	0	0	0	1	3	7	7	0	0	0	64.63	42.38	47.5517	49.6289	51.5556	40.8378	18.3694	91.3206
2016	融绿一级行业	卫生	1	0	0	0	0	0	0	1	0	0	0	40.25	40.25	40.25	46.97	36.43	37.5	10.83	84.38
2016	融绿一级行业	原材料加工制造业	25	0	0	0	2	4	7	7	5	0	0	59.88	35.13	46.012	43.4668	51.2548	43.232	19.584	85.6512
2016	融绿一级行业	建筑业	13	0	0	0	1	4	3	2	3	0	0	57.5	34.5	47.1169	48.0523	48.5723	44.0938	22.5162	84.0162
2016	融绿一级行业	房地产业	19	0	0	0	1	1	5	8	4	0	0	57.75	36.38	44.3847	44.3426	50.0005	38.7179	14.4979	89.2111
2016	融绿一级行业	木材、纺织、服饰和文教用品制造业	4	0	0	0	0	0	1	3	0	0	0	45.75	42.88	44.2525	41.6425	48.5925	42.695	13.7	90.0775
2016	融绿一级行业	水利、环境和公共设施管理业	2	0	0	0	0	0	2	0	0	0	0	46.63	45.38	46.005	47.765	51.705	38.62	16.46	90.315
2016	融绿一级行业	汽车制造业	11	0	0	0	1	2	5	3	0	0	0	55.5	44.25	48.5473	45.28	55.5245	45.0564	22.2745	87.9555
2016	融绿一级行业	电力、热力、燃气及水的生产和供应业	18	0	0	0	2	3	6	6	1	0	0	62.63	36.38	47.0933	43.6389	54.8056	43.4033	19.11	89.0628
2016	融绿一级行业	电气机械和器材、计算机、通信和其他电子设备制造业	33	0	0	0	3	4	14	10	2	0	0	62.63	38.13	47.2288	47.2088	52.5024	41.2494	16.39	93.4845
2016	融绿一级行业	运输设备和通用专用设备制造业	24	0	0	0	1	6	9	7	1	0	0	55.63	38.88	47.0546	44.6317	55.3738	41.3079	17.04	92.0717
2016	融绿一级行业	采矿业	17	0	0	0	2	2	4	7	2	0	0	60.25	36.5	46.2524	42.8771	52.4429	44.3712	23.7871	79.9471
2016	融绿一级行业	金融业	50	0	0	0	3	14	20	13	0	0	0	58.75	40.63	48.168	50.0642	53.1108	41.558	21.2754	88.5006
2016	融绿一级行业	食品饮料制造业	14	0	0	0	0	4	5	4	1	0	0	53.5	39.25	46.475	41.5179	52.1793	46.27	19.9857	86.2064
2017	融绿一级行业	交通运输、仓储和邮政业	17	0	0	0	4	4	4	3	2	0	0	61.5	37.88	49.9576	53.5771	51.4918	43.5353	23.2488	90.0182
2017	融绿一级行业	信息传输、软件和信息技术服务业	29	0	0	0	1	1	14	12	1	0	0	55.38	35.63	45.2572	47.2807	48.9166	39.1352	12.6517	94.1607
2017	融绿一级行业	其他服务业	24	0	0	0	1	2	6	14	1	0	0	55.75	40	45.2267	49.0829	49.4	37.2513	13.7067	92.5
2017	融绿一级行业	农、林、牧、渔业	3	0	0	0	0	1	2	0	0	0	0	54.25	46.63	49.17	46.82	55.9733	44.3	20.4867	92.19
2017	融绿一级行业	制造业	2	0	0	0	0	1	0	1	0	0	0	53.63	41.38	47.505	40.425	51.305	52.68	25.415	80.625
2017	融绿一级行业	医药制造业	17	0	0	0	2	1	9	5	0	0	0	62.38	41.25	48.2594	51.18	52.24	40.6071	19.8665	90.8465
2017	融绿一级行业	卫生	2	0	0	0	0	0	0	1	1	0	0	44.38	39.13	41.755	43.18	45.715	35.935	14.79	82.185
2017	融绿一级行业	原材料加工制造业	30	0	0	0	1	5	11	9	4	0	0	60.25	37.38	45.8357	45.097	49.8143	42.0843	19.6183	85.1573
2017	融绿一级行业	建筑业	13	0	0	0	1	5	2	4	1	0	0	56.75	36.25	47.8392	47.2646	50.4092	45.6054	24.2485	83.2215
2017	融绿一级行业	房地产业	19	0	0	0	1	1	6	9	2	0	0	55.38	36.5	44.8647	43.2674	50.2753	41.0132	15.5258	88.8653
2017	融绿一级行业	木材、纺织、服饰和文教用品制造业	6	0	0	0	0	0	1	5	0	0	0	46	41.13	43.8783	43.32	48.5717	39.0167	11.18	92.9167
2017	融绿一级行业	水利、环境和公共设施管理业	2	0	0	0	0	0	1	1	0	0	0	46.13	44.75	45.44	43.285	53.03	40.11	16.46	88.905
2017	融绿一级行业	汽车制造业	10	0	0	0	0	4	4	2	0	0	0	54.38	42.13	48.602	46.123	55.424	44.211	24	85.501
2017	融绿一级行业	电力、热力、燃气及水的生产和供应业	11	0	0	0	0	4	3	4	0	0	0	54.75	40.63	47.6727	44.2473	54.6173	44.8045	21.3073	87.2164
2017	融绿一级行业	电气机械和器材、计算机、通信和其他电子设备制造业	34	0	0	0	5	3	14	12	0	0	0	64	40.75	47.6053	47.9056	52.9062	41.1765	17.2741	93.0971
2017	融绿一级行业	运输设备和通用专用设备制造业	21	0	0	0	3	4	7	6	1	0	0	61.75	37.88	47.8	45.0567	56.67	41.8924	19.5343	90.1948
2017	融绿一级行业	采矿业	16	0	0	0	2	3	5	5	1	0	0	59.5	38.88	47.4019	43.7844	53.5538	45.9869	26.3544	78.9656
2017	融绿一级行业	金融业	59	0	0	0	7	18	20	14	0	0	0	61	41.5	49.0551	50.5585	53.708	43.0907	22.5149	88.8629
2017	融绿一级行业	食品饮料制造业	9	0	0	0	1	3	3	1	1	0	0	55.75	38.88	49.0156	44.1889	54.9844	48.3133	22.7311	88.44
2018	融绿一级行业	交通运输、仓储和邮政业	19	0	0	0	5	2	6	4	2	0	0	63.88	38.63	49.5358	53.2353	49.5747	44.7595	22.9953	89.3421
2018	融绿一级行业	信息传输、软件和信息技术服务业	19	0	0	0	0	2	11	6	0	0	0	54.88	40.13	46.7853	48.6653	50.3779	40.8947	15.5495	93.6358
2018	融绿一级行业	其他服务业	17	0	0	0	1	2	9	4	1	0	0	59.13	39.38	47.5624	51.3829	48.24	43.0647	18.3229	91.4153
2018	融绿一级行业	农、林、牧、渔业	1	0	0	0	1	0	0	0	0	0	0	56	56	56	51.64	60.82	56.14	31.25	93.13
2018	融绿一级行业	制造业	2	0	0	0	0	0	0	2	0	0	0	45	43.38	44.19	43.505	50	38.17	9.27	96.565
2018	融绿一级行业	医药制造业	23	0	0	1	3	8	9	2	0	0	0	65.38	42.75	49.8826	53.0609	52.6287	43.267	21.8122	91.9843
2018	融绿一级行业	卫生和社会工作	2	0	0	0	0	0	1	0	1	0	0	47.63	39.25	43.44	41.665	44.82	43.75	20.415	77.97
2018	融绿一级行业	原材料加工制造业	39	0	0	0	7	6	15	9	2	0	0	61.88	38.75	48.6021	46.92	53.1087	45.5133	22.6982	87.4531
2018	融绿一级行业	建筑业	14	0	0	0	1	6	4	3	0	0	0	55.88	40.75	49.0929	46.4743	52.7871	48.3743	25.5371	84.42
2018	融绿一级行业	房地产业	16	0	0	0	0	2	6	7	1	0	0	53.38	36.63	46.0263	44.0744	50.4019	44.0313	17.8663	88.2619
2018	融绿一级行业	木材、纺织、服饰和文教用品制造业	4	0	0	0	0	0	4	0	0	0	0	49.13	45.38	46.6275	44.4075	50	45.535	15.365	93.515
2018	融绿一级行业	水利、环境和公共设施管理业	2	0	0	0	0	0	1	1	0	0	0	45.75	44.63	45.19	43.47	51.515	40.67	18.335	85.47
2018	融绿一级行业	汽车制造业	12	0	0	0	3	1	4	4	0	0	0	56	42.25	49.0742	46.8467	56.185	44.0058	24.8617	85.3908
2018	融绿一级行业	电力、热力、燃气及水生产和供应业	11	0	0	0	1	6	2	2	0	0	0	56	43.13	50.0136	43.9118	58.37	49.4318	24.4891	88.2955
2018	融绿一级行业	电力、热力、燃气及水的生产和供应业	1	0	0	0	0	1	0	0	0	0	0	51.13	51.13	51.13	46.91	53.57	54.46	29.79	83.13
2018	融绿一级行业	电气机械和器材、计算机、通信和其他电子设备制造业	34	0	0	1	3	7	17	5	1	0	0	65.13	36.88	48.9879	49.0626	53.5097	43.8009	19.1553	93.7318
2018	融绿一级行业	租赁和商务服务业	4	0	0	0	1	0	0	3	0	0	0	56.25	41.5	46.565	51.8675	45.74	42.0725	19.17	87.6575
2018	融绿一级行业	运输设备和通用专用设备制造业	17	0	0	0	3	5	7	1	1	0	0	61	36.13	49.4359	46.0535	56.3494	46.5265	22.7582	89.4482
2018	融绿一级行业	采矿业	16	0	0	1	3	2	5	4	1	0	0	66.75	36.63	49.9475	45.7231	55.7206	49.595	30.4956	79.1225
2018	融绿一级行业	金融业	58	0	0	0	11	23	18	6	0	0	0	58.63	41.13	50.5697	52.5041	55.4255	44.0093	25.8633	87.6252
2018	融绿一级行业	食品饮料制造业	13	0	0	0	1	3	4	4	1	0	0	55.63	39.13	47.7631	42.0038	55.5423	46.12	20.0492	89.3285
2019	融绿一级行业	交通运输、仓储和邮政业	17	0	0	0	6	3	3	4	1	0	0	59.25	38.63	49.7965	54.3535	50.1729	43.5359	25.6012	86.0859
2019	融绿一级行业	信息传输、软件和信息技术服务业	17	0	0	0	1	3	11	2	0	0	0	60.13	40.88	48.3924	50.5165	53.0088	41.1529	17.1324	95.2759
2019	融绿一级行业	其他服务业	21	0	0	0	2	5	11	3	0	0	0	57.75	42.75	48.6095	52.31	49.3686	44.1533	20.6652	90.5214
2019	融绿一级行业	农、林、牧、渔业	2	0	0	0	1	0	1	0	0	0	0	56	48.5	52.25	48.025	60.635	48.025	27.395	89.535
2019	融绿一级行业	制造业	3	0	0	0	1	1	0	1	0	0	0	55.25	42.63	49.3367	48.2367	54.83	44.5967	23.8867	87.5
2019	融绿一级行业	医药制造业	22	0	0	1	2	7	10	2	0	0	0	66.25	42.38	51.1732	54.2259	53.6982	45.0877	23.9027	92.0741
2019	融绿一级行业	卫生	3	0	0	0	0	0	2	0	1	0	0	49.63	38.88	44.92	45.7067	44.88	44.14	17.9867	85.3133
2019	融绿一级行业	原材料加工制造业	36	0	0	0	9	9	11	7	0	0	0	63.5	41.13	50.9292	50.8481	54.3014	47	26.7428	87.2053
2019	融绿一级行业	建筑业	11	0	0	0	0	4	5	2	0	0	0	53.63	40.75	48.2527	46.6209	49.8282	48.6618	27.2727	79.7164
2019	融绿一级行业	房地产业	17	0	0	0	0	3	6	6	2	0	0	53.13	37.88	45.6724	44.6147	49.6688	42.9347	18.6153	86.2518
2019	融绿一级行业	木材、纺织、服饰和文教用品制造业	3	0	0	0	0	1	1	1	0	0	0	51.75	44.63	48.3767	45.7233	51.5933	48.0667	17.57	94.5833
2019	融绿一级行业	水利、环境和公共设施管理业	1	0	0	0	0	0	1	0	0	0	0	46.63	46.63	46.63	44.78	53.41	41.79	19.17	87.81
2019	融绿一级行业	汽车制造业	9	0	0	0	1	3	4	1	0	0	0	57.75	43.38	50.8222	49.8567	56.5389	45.6133	28.2856	84.62
2019	融绿一级行业	电力、热力、燃气及水的生产和供应业	9	0	0	0	4	3	2	0	0	0	0	61.88	45.38	54.4044	51.1322	59.1711	53.77	29.7922	91.32
2019	融绿一级行业	电气机械和器材、计算机、通信和其他电子设备制造业	39	0	0	1	6	9	20	3	0	0	0	67.63	43.5	50.3487	50.4049	55.7403	44.131	21.7103	93.3015
2019	融绿一级行业	运输设备和通用专用设备制造业	17	0	0	1	3	5	6	2	0	0	0	65.25	41.38	50.6353	49.0124	57.1429	45.7653	24.1418	90.3682
2019	融绿一级行业	采矿业	14	0	0	1	3	7	3	0	0	0	0	66.75	47	54.6457	53.7721	58.0357	52.2171	36.98	81.1393
2019	融绿一级行业	金融业	62	0	0	0	19	17	22	4	0	0	0	60.75	43.5	52.1011	53.5847	57.074	45.8395	28.045	88.1806
2019	融绿一级行业	食品饮料制造业	13	0	0	0	1	4	6	2	0	0	0	55.88	43.75	48.57	44.3569	55.0046	46.4638	22.2446	88.0538
2015	融绿二级行业	互联网和相关服务	7	0	0	0	0	0	3	3	1	0	0	48.13	38.88	44.45	46.1271	48.16	38.6629	10.8343	94.8657
2015	融绿二级行业	其他服务业	23	0	0	0	1	1	8	11	2	0	0	55.25	36.5	44.4961	50.0487	49.1596	34.3448	12.7543	92.1061
2015	融绿二级行业	其他运输业和邮政业	9	0	0	0	2	2	5	0	0	0	0	64.5	45.75	51.6689	53.0778	54.4933	46.5511	22.2467	95.8
2015	融绿二级行业	农业	2	0	0	0	0	0	2	0	0	0	0	48.25	47.88	48.065	45.065	50.935	48.68	14.895	97.815
2015	融绿二级行业	化学、橡胶、塑料和非金属矿物制品业	12	0	0	0	0	1	4	5	2	0	0	50.13	37.38	44.1492	43.805	48.5708	39.3225	14.585	88.4917
2015	融绿二级行业	医药制造业	20	0	0	0	1	3	12	4	0	0	0	62.13	43	48.1025	50.2115	51.68	41.815	17.8545	93.4695
2015	融绿二级行业	卫生	1	0	0	0	0	0	0	1	0	0	0	43.5	43.5	43.5	53.03	40	37.5	11.67	91.25
2015	融绿二级行业	土木工程建筑业	12	0	0	0	1	3	4	1	3	0	0	55.38	30.88	45.805	47.9433	46.5275	41.9642	20.2442	84.1417
2015	融绿二级行业	建筑装饰和其他建筑业	2	0	0	0	0	0	1	1	0	0	0	47.25	42.88	45.065	45.51	51.895	36.385	15	90.155
2015	融绿二级行业	房地产业	13	0	0	0	0	2	4	5	2	0	0	52.5	38.75	44.6369	45.4538	48.2331	39.9423	14.6308	89.64
2015	融绿二级行业	文教、工美、体育和娱乐用品制造业	1	0	0	0	0	0	1	0	0	0	0	45.63	45.63	45.63	44.08	47.79	45.09	9.38	100
2015	融绿二级行业	新闻和出版业	4	0	0	0	0	0	2	2	0	0	0	49	40.75	44.6875	48.975	50.57	34.6075	11.1475	95
2015	融绿二级行业	汽车制造业	12	0	0	0	0	5	6	1	0	0	0	53.63	44.38	49.3883	47.0083	55.0975	46.1275	22.2742	90.0525
2015	融绿二级行业	生态保护和环境治理业	2	0	0	0	0	0	1	1	0	0	0	46.63	44.75	45.69	47.765	51.325	38.06	15.935	90.315
2015	融绿二级行业	电信、广播电视和卫星传输服务	5	0	0	0	0	1	3	1	0	0	0	54.5	40.63	47.202	47.184	49.848	44.446	16	94.002
2015	融绿二级行业	电力、热力、燃气及水的生产和供应业	20	0	0	0	0	5	8	6	1	0	0	54.63	37.25	46.689	42.886	54.107	43.84	16.333	92.2195
2015	融绿二级行业	电气机械和器材制造业	8	0	0	0	0	1	5	2	0	0	0	50.75	43	46.7513	46.6263	51.135	41.9188	15.9138	93.0088
2015	融绿二级行业	石油加工、炼焦及核燃料加工业	1	0	0	0	0	0	1	0	0	0	0	50	50	50	45.78	45.52	61.16	27.5	83.75
2015	融绿二级行业	纺织业	3	0	0	0	0	0	1	2	0	0	0	49.25	44.25	45.9167	44.5133	47.7933	45.5333	15.35	91.77
2015	融绿二级行业	航空运输业	7	0	0	0	1	1	3	1	1	0	0	55.63	38.75	47.4843	52.8957	46.5329	41.6871	18.2457	91.34
2015	融绿二级行业	计算机、通信和其他电子设备制造业	19	0	0	1	3	2	8	5	0	0	0	65.13	40.75	49.3711	50.1395	53.8068	43.3074	19.1132	94.7537
2015	融绿二级行业	软件和信息技术服务业	11	0	0	0	0	0	6	5	0	0	0	47.63	42.88	45.4455	48.3355	50.3091	37.0845	11.1182	96.9327
2015	融绿二级行业	运输设备制造业	9	0	0	0	0	1	3	5	0	0	0	53.75	40.75	46.2667	41.7011	55.9511	41.9522	14.9544	93.2289
2015	融绿二级行业	通用专用设备制造业	12	0	0	0	0	2	6	4	0	0	0	53.13	43	47.1908	46.4383	54.6958	40.05	17.1033	92.3183
2015	融绿二级行业	道路运输业	1	0	0	0	0	0	1	0	0	0	0	47	47	47	44.59	51.84	44.4	16.46	92.81
2015	融绿二级行业	采矿业	22	0	0	0	3	1	7	9	2	0	0	59.88	39.25	46.4005	43.285	51.9791	44.7886	21.9614	83.055
2015	融绿二级行业	金属冶炼和压延加工业	16	0	0	0	2	3	4	6	1	0	0	58.13	37.38	47.7131	46.6319	51.165	45.0606	21.7456	86.6613
2015	融绿二级行业	金属制品业	2	0	0	0	0	1	0	1	0	0	0	51.13	42	46.565	39.445	53.92	47.545	17.5	90.155
2015	融绿二级行业	银行业	16	0	0	0	3	7	6	0	0	0	0	57.63	45.63	51.8788	54.91	51.8138	49.1613	30.4956	83.9475
2015	融绿二级行业	非银金融业	27	0	0	0	0	4	13	10	0	0	0	54	40.25	46.3637	47.7967	52.8589	38.6478	16.8685	90.6022
2015	融绿二级行业	食品饮料制造业	16	0	0	0	0	3	4	8	1	0	0	54.75	39.13	45.1894	42.0019	49.9306	43.7506	17.3831	86.8963
2016	融绿二级行业	互联网和相关服务	8	0	0	0	0	0	3	4	1	0	0	46.63	37	43.4713	45.9513	48.105	35.815	10.26	93.2813
2016	融绿二级行业	住宿和餐饮业	1	0	0	0	0	0	1	0	0	0	0	49.13	49.13	49.13	48.88	59.85	38.81	18.13	95.63
2016	融绿二级行业	其他服务业	27	0	0	0	1	2	7	15	2	0	0	56.75	37.75	45.2563	49.5993	49.5648	36.6644	13.9196	92.257
2016	融绿二级行业	其他运输业和邮政业	8	0	0	0	3	1	3	1	0	0	0	63.5	44.88	51.5663	53.1238	54.1825	46.4988	23.0213	94.3763
2016	融绿二级行业	农业	1	0	0	0	0	0	1	0	0	0	0	48.25	48.25	48.25	50	55.97	36.84	16.88	95.31
2016	融绿二级行业	化学、橡胶、塑料和非金属矿物制品业	10	0	0	0	0	1	3	3	3	0	0	53	35.13	43.827	41.493	50.337	39.242	15.438	86.408
2016	融绿二级行业	医药制造业	18	0	0	0	1	3	7	7	0	0	0	64.63	42.38	47.5517	49.6289	51.5556	40.8378	18.3694	91.3206
2016	融绿二级行业	卫生	1	0	0	0	0	0	0	1	0	0	0	40.25	40.25	40.25	46.97	36.43	37.5	10.83	84.38
2016	融绿二级行业	土木工程建筑业	12	0	0	0	1	4	3	2	2	0	0	57.5	34.5	47.7617	48.745	48.7375	45.2383	23.4025	84.2983
2016	融绿二级行业	建筑装饰和其他建筑业	1	0	0	0	0	0	0	0	1	0	0	39.38	39.38	39.38	39.74	46.59	30.36	11.88	80.63
2016	融绿二级行业	房地产业	19	0	0	0	1	1	5	8	4	0	0	57.75	36.38	44.3847	44.3426	50.0005	38.7179	14.4979	89.2111
2016	融绿二级行业	文教、工美、体育和娱乐用品制造业	1	0	0	0	0	0	0	1	0	0	0	44.63	44.63	44.63	41.45	47.79	45.09	9.38	97.5
2016	融绿二级行业	新闻和出版业	4	0	0	0	0	0	1	3	0	0	0	47.75	41.13	44.0025	47.2925	50.19	34.61	10.8325	93.75
2016	融绿二级行业	汽车制造业	11	0	0	0	1	2	5	3	0	0	0	55.5	44.25	48.5473	45.28	55.5245	45.0564	22.2745	87.9555
2016	融绿二级行业	生态保护和环境治理业	2	0	0	0	0	0	2	0	0	0	0	46.63	45.38	46.005	47.765	51.705	38.62	16.46	90.315
2016	融绿二级行业	电信、广播电视和卫星传输服务	6	0	0	0	0	1	2	3	0	0	0	52.25	41.13	45.9183	47.0083	49.7483	40.675	14.445	93.1283
2016	融绿二级行业	电力、热力、燃气及水的生产和供应业	18	0	0	0	2	3	6	6	1	0	0	62.63	36.38	47.0933	43.6389	54.8056	43.4033	19.11	89.0628
2016	融绿二级行业	电气机械和器材制造业	9	0	0	0	0	1	5	2	1	0	0	52.13	38.13	45.5578	46.9278	50.38	38.2667	15.3244	90.9022
2016	融绿二级行业	畜牧业	2	0	0	0	0	1	1	0	0	0	0	54.25	46	50.125	46.055	55.22	49.56	20.005	95.31
2016	融绿二级行业	石油加工、炼焦及核燃料加工业	1	0	0	0	0	1	0	0	0	0	0	53.13	53.13	53.13	48.05	54.1	58.93	32.92	83.44
2016	融绿二级行业	纺织业	3	0	0	0	0	0	1	2	0	0	0	45.75	42.88	44.1267	41.7067	48.86	41.8967	15.14	87.6033
2016	融绿二级行业	航空运输业	7	0	0	0	1	3	1	2	0	0	0	56.88	40.63	49.02	55.0671	49.0529	41.2543	23.0671	87.9486
2016	融绿二级行业	计算机、通信和其他电子设备制造业	24	0	0	0	3	3	9	8	1	0	0	62.63	39	47.8554	47.3142	53.2983	42.3679	16.7896	94.4529
2016	融绿二级行业	软件和信息技术服务业	16	0	0	0	0	0	10	6	0	0	0	49.63	40.88	45.6281	47.4475	49.9288	39.0613	11.4856	96.8363
2016	融绿二级行业	运输设备制造业	11	0	0	0	1	3	0	6	1	0	0	55.63	38.88	46.1055	42.4609	55.6291	40.7145	15.7773	91.5918
2016	融绿二级行业	通用专用设备制造业	13	0	0	0	0	3	9	1	0	0	0	53.63	42	47.8577	46.4685	55.1577	41.81	18.1085	92.4777
2016	融绿二级行业	采矿业	17	0	0	0	2	2	4	7	2	0	0	60.25	36.5	46.2524	42.8771	52.4429	44.3712	23.7871	79.9471
2016	融绿二级行业	金属冶炼和压延加工业	13	0	0	0	2	3	3	3	2	0	0	59.88	37	47.6654	45.8031	51.4362	45.7069	22.9338	84.7608
2016	融绿二级行业	金属制品业	2	0	0	0	0	0	1	1	0	0	0	48.13	44.25	46.19	38.15	54.665	47.095	18.54	87.655
2016	融绿二级行业	银行业	16	0	0	0	3	7	6	0	0	0	0	58.75	45.75	51.98	55.1581	52.3906	48.6638	31.3681	82.8931
2016	融绿二级行业	非银金融业	34	0	0	0	0	7	14	13	0	0	0	54.13	40.63	46.3741	47.6671	53.4497	38.2141	16.5259	91.1394
2016	融绿二级行业	食品饮料制造业	14	0	0	0	0	4	5	4	1	0	0	53.5	39.25	46.475	41.5179	52.1793	46.27	19.9857	86.2064
2017	融绿二级行业	互联网和相关服务	10	0	0	0	0	0	3	6	1	0	0	46.38	35.63	43.277	45.986	46.667	36.667	10.19	92.908
2017	融绿二级行业	其他服务业	22	0	0	0	1	2	6	12	1	0	0	55.75	40	45.2982	49.1864	49.2423	37.5168	13.9773	92.2727
2017	融绿二级行业	其他运输业和邮政业	11	0	0	0	3	1	4	1	2	0	0	61.5	37.88	49.32	51.1973	52.1727	43.5736	20.9291	91.9036
2017	融绿二级行业	农业	1	0	0	0	0	0	1	0	0	0	0	46.63	46.63	46.63	47.37	55.6	35.09	15.83	92.81
2017	融绿二级行业	化学、橡胶、塑料和非金属矿物制品业	14	0	0	0	0	1	5	4	4	0	0	51.88	37.38	43.85	43.5064	48.855	38.33	16.5636	84.7779
2017	融绿二级行业	医药制造业	17	0	0	0	2	1	9	5	0	0	0	62.38	41.25	48.2594	51.18	52.24	40.6071	19.8665	90.8465
2017	融绿二级行业	卫生	2	0	0	0	0	0	0	1	1	0	0	44.38	39.13	41.755	43.18	45.715	35.935	14.79	82.185
2017	融绿二级行业	土木工程建筑业	12	0	0	0	1	5	2	3	1	0	0	56.75	36.25	48.18	47.6775	50.38	46.2808	25.21	82.6308
2017	融绿二级行业	建筑装饰和其他建筑业	1	0	0	0	0	0	0	1	0	0	0	43.75	43.75	43.75	42.31	50.76	37.5	12.71	90.31
2017	融绿二级行业	房地产业	19	0	0	0	1	1	6	9	2	0	0	55.38	36.5	44.8647	43.2674	50.2753	41.0132	15.5258	88.8653
2017	融绿二级行业	文教、工美、体育和娱乐用品制造业	1	0	0	0	0	0	0	1	0	0	0	44.88	44.88	44.88	44.08	47.79	42.41	9.79	97.5
2017	融绿二级行业	新闻和出版业	2	0	0	0	0	0	0	2	0	0	0	44.63	44.25	44.44	47.945	51.135	34.33	10.73	95
2017	融绿二级行业	木材制品制造业	3	0	0	0	0	0	0	3	0	0	0	44.13	41.13	42.63	41.23	48.7733	37.0533	8.5433	93.75
2017	融绿二级行业	汽车制造业	10	0	0	0	0	4	4	2	0	0	0	54.38	42.13	48.602	46.123	55.424	44.211	24	85.501
2017	融绿二级行业	生态保护和环境治理业	2	0	0	0	0	0	1	1	0	0	0	46.13	44.75	45.44	43.285	53.03	40.11	16.46	88.905
2017	融绿二级行业	电信、广播电视和卫星传输服务	6	0	0	0	1	0	2	3	0	0	0	55.38	42.25	46.44	47.7133	50.6317	40.6083	16.2833	91.67
2017	融绿二级行业	电力、热力、燃气及水的生产和供应业	11	0	0	0	0	4	3	4	0	0	0	54.75	40.63	47.6727	44.2473	54.6173	44.8045	21.3073	87.2164
2017	融绿二级行业	电气机械和器材制造业	9	0	0	0	0	1	4	4	0	0	0	53.5	40.88	45.4744	47.8622	48.9433	38.41	15.3011	90.7289
2017	融绿二级行业	畜牧业	2	0	0	0	0	1	1	0	0	0	0	54.25	46.63	50.44	46.545	56.16	48.905	22.815	91.88
2017	融绿二级行业	石油加工、炼焦及核燃料加工业	2	0	0	0	0	1	0	1	0	0	0	53.63	41.38	47.505	40.425	51.305	52.68	25.415	80.625
2017	融绿二级行业	纺织业	2	0	0	0	0	0	1	1	0	0	0	46	44.5	45.25	46.075	48.66	40.265	15.83	89.375
2017	融绿二级行业	航空运输业	6	0	0	0	1	3	0	2	0	0	0	59.63	43.75	51.1267	57.94	50.2433	43.465	27.5017	86.5617
2017	融绿二级行业	计算机、通信和其他电子设备制造业	25	0	0	0	5	2	10	8	0	0	0	64	40.75	48.3724	47.9212	54.3328	42.1724	17.9844	93.9496
2017	融绿二级行业	软件和信息技术服务业	13	0	0	0	0	1	9	3	0	0	0	50.63	41.13	46.2346	48.0769	49.8554	40.3538	12.8692	96.2738
2017	融绿二级行业	运输设备制造业	11	0	0	0	1	3	2	4	1	0	0	61.75	37.88	47.23	43.6136	55.7364	42.9073	18.9973	89.5745
2017	融绿二级行业	通用专用设备制造业	10	0	0	0	2	1	5	2	0	0	0	57.5	41	48.427	46.644	57.697	40.776	20.125	90.877
2017	融绿二级行业	采矿业	16	0	0	0	2	3	5	5	1	0	0	59.5	38.88	47.4019	43.7844	53.5538	45.9869	26.3544	78.9656
2017	融绿二级行业	金属冶炼和压延加工业	16	0	0	0	1	4	6	5	0	0	0	60.25	40.5	47.5731	46.4888	50.6538	45.3694	22.2913	85.4894
2017	融绿二级行业	银行业	21	0	0	0	5	10	4	2	0	0	0	61	44.13	51.8352	54.5352	53.3262	47.8943	29.5938	85.1952
2017	融绿二级行业	非银金融业	38	0	0	0	2	8	16	12	0	0	0	56.25	41.5	47.5187	48.3608	53.9189	40.4361	18.6029	90.8897
2017	融绿二级行业	食品饮料制造业	9	0	0	0	1	3	3	1	1	0	0	55.75	38.88	49.0156	44.1889	54.9844	48.3133	22.7311	88.44
2018	融绿二级行业	互联网和相关服务	7	0	0	0	0	0	4	3	0	0	0	49	40.5	45.4129	46.3271	47.9429	41.7243	13.7814	92.8586
2018	融绿二级行业	其他服务业	20	0	0	0	2	2	8	7	1	0	0	59.13	39.38	47.3345	51.493	47.614	42.8925	18.7315	90.2345
2018	融绿二级行业	其他运输业和邮政业	11	0	0	0	4	0	3	2	2	0	0	63.88	38.63	49.7073	51.9036	49.6991	46.9036	22.7673	90.1136
2018	融绿二级行业	化学、橡胶、塑料和非金属矿物制品业	22	0	0	0	3	3	9	6	1	0	0	59.38	39.38	48.2414	45.4541	53.7477	45.4755	20.1327	90.3991
2018	融绿二级行业	医药制造业	23	0	0	1	3	8	9	2	0	0	0	65.38	42.75	49.8826	53.0609	52.6287	43.267	21.8122	91.9843
2018	融绿二级行业	卫生	2	0	0	0	0	0	1	0	1	0	0	47.63	39.25	43.44	41.665	44.82	43.75	20.415	77.97
2018	融绿二级行业	土木工程建筑业	13	0	0	0	1	6	3	3	0	0	0	55.88	40.75	49.2246	46.5977	52.6808	48.7985	26.2992	83.6062
2018	融绿二级行业	建筑装饰和其他建筑业	1	0	0	0	0	0	1	0	0	0	0	47.38	47.38	47.38	44.87	54.17	42.86	15.63	95
2018	融绿二级行业	房地产业	16	0	0	0	0	2	6	7	1	0	0	53.38	36.63	46.0263	44.0744	50.4019	44.0313	17.8663	88.2619
2018	融绿二级行业	新闻和出版业	1	0	0	0	0	0	1	0	0	0	0	48.13	48.13	48.13	51.12	50.76	42.54	13.54	100
2018	融绿二级行业	木材制品制造业	2	0	0	0	0	0	2	0	0	0	0	49.13	45.75	47.44	45.72	50.185	46.425	15.31	95.625
2018	融绿二级行业	水的生产和供应业	1	0	0	0	0	0	1	0	0	0	0	45.13	45.13	45.13	30.86	61.11	47.77	21.88	80
2018	融绿二级行业	汽车制造业	12	0	0	0	3	1	4	4	0	0	0	56	42.25	49.0742	46.8467	56.185	44.0058	24.8617	85.3908
2018	融绿二级行业	生态保护和环境治理业	2	0	0	0	0	0	1	1	0	0	0	45.75	44.63	45.19	43.47	51.515	40.67	18.335	85.47
2018	融绿二级行业	电信、广播电视和卫星传输服务	4	0	0	0	0	1	2	1	0	0	0	54.88	41.5	48.7525	50.4425	54.3525	40.9725	21.5625	89.5325
2018	融绿二级行业	电力、热力、燃气及水的生产和供应业	1	0	0	0	0	1	0	0	0	0	0	51.13	51.13	51.13	46.91	53.57	54.46	29.79	83.13
2018	融绿二级行业	电力、热力生产和供应业	10	0	0	0	1	6	1	2	0	0	0	56	43.13	50.502	45.217	58.096	49.598	24.75	89.125
2018	融绿二级行业	电气机械和器材制造业	10	0	0	0	0	2	6	1	1	0	0	52.38	36.88	46.265	48.617	50.871	37.931	16.584	90.782
2018	融绿二级行业	畜牧业	1	0	0	0	1	0	0	0	0	0	0	56	56	56	51.64	60.82	56.14	31.25	93.13
2018	融绿二级行业	石油加工、炼焦及核燃料加工业	2	0	0	0	1	0	0	1	0	0	0	59.88	43.13	51.505	48.865	53.355	52.9	31.355	81.72
2018	融绿二级行业	纺织业	2	0	0	0	0	0	2	0	0	0	0	46.25	45.38	45.815	43.095	49.815	44.645	15.42	91.405
2018	融绿二级行业	航空运输业	7	0	0	0	1	2	3	1	0	0	0	59.38	42.88	49.9671	56.5143	49.5286	42.1186	25.5371	86.6071
2018	融绿二级行业	计算机、通信和其他电子设备制造业	24	0	0	1	3	5	11	4	0	0	0	65.13	43.25	50.1225	49.2483	54.6092	46.2467	20.2267	94.9608
2018	融绿二级行业	软件和信息技术服务业	8	0	0	0	0	1	5	2	0	0	0	51.63	40.13	47.0025	49.8225	50.5213	40.13	14.09	96.3675
2018	融绿二级行业	运输设备制造业	8	0	0	0	1	3	3	0	1	0	0	58.25	36.13	48.9863	44.3438	55.605	48.115	22.97	88.0075
2018	融绿二级行业	通用专用设备制造业	9	0	0	0	2	2	4	1	0	0	0	61	40.88	49.8356	47.5733	57.0111	45.1144	22.57	90.7289
2018	融绿二级行业	道路运输业	1	0	0	0	0	0	0	1	0	0	0	44.63	44.63	44.63	44.93	48.53	39.66	7.71	100
2018	融绿二级行业	采矿业	16	0	0	1	3	2	5	4	1	0	0	66.75	36.63	49.9475	45.7231	55.7206	49.595	30.4956	79.1225
2018	融绿二级行业	金属冶炼和压延加工业	16	0	0	0	3	3	6	3	1	0	0	61.88	38.75	48.4944	47.9719	52.7513	44.1131	23.6725	85.7238
2018	融绿二级行业	金属制品业	1	0	0	0	0	0	0	1	0	0	0	43.63	43.63	43.63	51.62	38.06	39.29	19.38	80
2018	融绿二级行业	银行业	21	0	0	0	5	12	4	0	0	0	0	58.63	47.25	52.6571	55.9719	54.6386	47.6705	32.1933	83.35
2018	融绿二级行业	非银金融业	37	0	0	0	6	11	14	6	0	0	0	58.13	41.13	49.3849	50.5359	55.8722	41.9314	22.2705	90.0516
2018	融绿二级行业	食品饮料制造业	13	0	0	0	1	3	4	4	1	0	0	55.63	39.13	47.7631	42.0038	55.5423	46.12	20.0492	89.3285
2019	融绿二级行业	互联网和相关服务	5	0	0	0	0	0	5	0	0	0	0	49.75	45.38	46.678	48.026	51.744	39.842	14.916	94.312
2019	融绿二级行业	其他服务业	21	0	0	0	2	5	11	3	0	0	0	57.75	42.75	48.6095	52.31	49.3686	44.1533	20.6652	90.5214
2019	融绿二级行业	其他运输业和邮政业	10	0	0	0	3	2	1	3	1	0	0	59.25	38.63	48.64	52.232	48.933	43.708	23.209	86.783
2019	融绿二级行业	化学、橡胶、塑料和非金属矿物制品业	20	0	0	0	5	3	8	4	0	0	0	63.5	42.63	50.377	49.773	53.826	47.0765	24.2715	89.5315
2019	融绿二级行业	医药制造业	22	0	0	1	2	7	10	2	0	0	0	66.25	42.38	51.1732	54.2259	53.6982	45.0877	23.9027	92.0741
2019	融绿二级行业	卫生	3	0	0	0	0	0	2	0	1	0	0	49.63	38.88	44.92	45.7067	44.88	44.14	17.9867	85.3133
2019	融绿二级行业	土木工程建筑业	10	0	0	0	0	4	4	2	0	0	0	53.63	40.75	48.565	46.956	49.773	49.376	28.375	78.844
2019	融绿二级行业	建筑装饰和其他建筑业	1	0	0	0	0	0	1	0	0	0	0	45.13	45.13	45.13	43.27	50.38	41.52	16.25	88.44
2019	融绿二级行业	房地产业	17	0	0	0	0	3	6	6	2	0	0	53.13	37.88	45.6724	44.6147	49.6688	42.9347	18.6153	86.2518
2019	融绿二级行业	文教、工美、体育和娱乐用品制造业	1	0	0	0	0	1	0	0	0	0	0	51.75	51.75	51.75	49.01	52.57	54.46	21.04	97.81
2019	融绿二级行业	木材制品制造业	1	0	0	0	0	0	0	1	0	0	0	44.63	44.63	44.63	42.11	48.9	42.86	13.96	90.63
2019	融绿二级行业	汽车制造业	11	0	0	0	2	4	4	1	0	0	0	57.75	43.38	51.1618	50.5527	57.4136	44.8564	28.1045	85.74
2019	融绿二级行业	生态保护和环境治理业	1	0	0	0	0	0	1	0	0	0	0	46.63	46.63	46.63	44.78	53.41	41.79	19.17	87.81
2019	融绿二级行业	电信、广播电视和卫星传输服务	3	0	0	0	1	1	0	1	0	0	0	60.13	45	53.17	55.4	58.33	45.2367	25.8333	94.17
2019	融绿二级行业	电力、热力、燃气及水的生产和供应业	9	0	0	0	4	3	2	0	0	0	0	61.88	45.38	54.4044	51.1322	59.1711	53.77	29.7922	91.32
2019	融绿二级行业	电气机械和器材制造业	9	0	0	0	0	2	6	1	0	0	0	54	44.88	47.7667	49.4878	52.9467	39.6089	19.2144	90.5911
2019	融绿二级行业	畜牧业	2	0	0	0	1	0	1	0	0	0	0	56	48.5	52.25	48.025	60.635	48.025	27.395	89.535
2019	融绿二级行业	石油加工、炼焦及核燃料加工业	2	0	0	0	1	0	0	1	0	0	0	61.88	42.63	52.255	48.7	54.475	54.465	33.435	80.47
2019	融绿二级行业	纺织业	1	0	0	0	0	0	1	0	0	0	0	48.75	48.75	48.75	46.05	53.31	46.88	17.71	95.31
2019	融绿二级行业	航空运输业	7	0	0	0	3	1	2	1	0	0	0	58	44.5	51.4486	57.3843	51.9443	43.29	29.0186	85.09
2019	融绿二级行业	计算机、通信和其他电子设备制造业	30	0	0	1	6	7	14	2	0	0	0	67.63	43.5	51.1233	50.68	56.5783	45.4877	22.459	94.1147
2019	融绿二级行业	软件和信息技术服务业	9	0	0	0	0	2	6	1	0	0	0	50.5	40.88	47.7522	50.2722	51.9378	40.52	15.4633	96.18
2019	融绿二级行业	运输设备制造业	8	0	0	0	2	3	2	1	0	0	0	56.38	41.38	50.3788	46.4	57.0925	48.49	24.3213	89.4525
2019	融绿二级行业	通用专用设备制造业	9	0	0	1	1	2	4	1	0	0	0	65.25	43	50.8633	51.3344	57.1878	43.3433	23.9822	91.1822
2019	融绿二级行业	采矿业	14	0	0	1	3	7	3	0	0	0	0	66.75	47	54.6457	53.7721	58.0357	52.2171	36.98	81.1393
2019	融绿二级行业	金属冶炼和压延加工业	14	0	0	0	3	6	3	2	0	0	0	63.5	42.5	51.6357	52.0414	55.2486	46.7486	29.4357	84.9336
2019	融绿二级行业	金属制品业	1	0	0	0	0	0	0	1	0	0	0	41.13	41.13	41.13	46.43	37.69	37.95	15.42	79.69
2019	融绿二级行业	银行业	24	0	0	0	6	11	7	0	0	0	0	60.63	47.75	53.3313	55.7379	55.7288	48.7629	32.3538	84.7925
2019	融绿二级行业	非银金融业	38	0	0	0	13	6	15	4	0	0	0	60.75	43.5	51.3242	52.2247	57.9237	43.9932	25.3237	90.3205
2019	融绿二级行业	食品饮料制造业	13	0	0	0	1	4	6	2	0	0	0	55.88	43.75	48.57	44.3569	55.0046	46.4638	22.2446	88.0538
2020	证监会行业	交通运输、仓储和邮政业-水上运输业	5	0	0	1	1	1	1	1	0	0	0	65.75	44.625	54.725	56.486	58.528	48.014	30.71	90.75
2020	证监会行业	交通运输、仓储和邮政业-航空运输业	7	0	0	0	2	4	1	0	0	0	0	57.25	46.25	52.3214	56.42	54.2043	44.8886	28.7186	87.7229
2020	证监会行业	交通运输、仓储和邮政业-邮政业	4	0	0	0	0	0	1	3	0	0	0	45.125	41	42.6875	47.9725	39.155	40.0875	17.655	80.2375
2020	证监会行业	交通运输、仓储和邮政业-铁路运输业	2	0	0	0	0	0	1	1	0	0	0	48.5	44	46.25	44.595	47.61	46.765	18.435	87.97
2020	证监会行业	信息传输、软件和信息技术服务业-互联网和相关服务	4	0	0	0	1	0	3	0	0	0	0	62	45.875	51.0313	55.8975	54.545	41.865	22.865	93.2825
2020	证监会行业	信息传输、软件和信息技术服务业-电信、广播电视和卫星传输服务	3	0	0	0	2	0	1	0	0	0	0	58.125	45.25	52.875	55.1667	57.4533	45.5	25.8333	93.44
2020	证监会行业	信息传输、软件和信息技术服务业-软件和信息技术服务业	8	0	0	0	0	5	2	1	0	0	0	54.875	40.75	49.7031	53.8288	52.6513	41.965	19.4038	95.1563
2020	证监会行业	农、林、牧、渔业-畜牧业	2	0	0	0	0	1	1	0	0	0	0	52.625	49.125	50.875	47.04	57.275	48.465	24.795	90.005
2020	证监会行业	制造业-专用设备制造业	9	0	0	0	0	3	4	2	0	0	0	53.75	40.25	47.6806	46.2022	54.2767	42.53	17.6167	92.7778
2020	证监会行业	制造业-农副食品加工业	5	0	0	0	1	0	3	0	1	0	0	59.5	39.5	47.975	41.512	55	48.216	23.75	84.312
2020	证监会行业	制造业-化学原料及化学制品制造业	6	0	0	1	0	2	2	1	0	0	0	71	43.75	53.4167	54.9783	55.4117	48.8867	30.1067	88.3867
2020	证监会行业	制造业-化学纤维制造业	3	0	0	0	1	0	2	0	0	0	0	56.25	45.625	49.3333	50.8667	52.24	43.7533	18.75	95.21
2020	证监会行业	制造业-医药制造业	22	0	0	2	3	8	9	0	0	0	0	68.75	45.75	52.8125	57.3614	54.0027	46.3159	24.8223	94.8023
2020	证监会行业	制造业-家具制造业	1	0	0	0	0	0	0	1	0	0	0	40.125	40.125	40.125	43.42	40.44	35.27	12.08	82.19
2020	证监会行业	制造业-文教、工美、体育和娱乐用品制造业	1	0	0	0	0	1	0	0	0	0	0	51.75	51.75	51.75	54.28	52.57	47.32	21.04	97.81
2020	证监会行业	制造业-有色金属冶炼和压延加工业	8	0	0	0	4	0	3	1	0	0	0	64.625	43.125	53.4844	54.6275	54.5263	50.67	31.485	86.485
2020	证监会行业	制造业-橡胶和塑料制品业	1	0	0	0	0	0	1	0	0	0	0	49.75	49.75	49.75	49.35	51.87	47.77	17.71	97.81
2020	证监会行业	制造业-汽车制造业	9	0	0	0	4	2	3	0	0	0	0	64.375	45.375	53.0694	54.8078	56.4533	46.8322	33.0089	83.16
2020	证监会行业	制造业-电气机械和器材制造业	12	0	0	0	2	1	7	2	0	0	0	60.125	43.875	49.9167	51.0958	55.3675	42.17	22.015	91.7717
2020	证监会行业	制造业-石油加工、炼焦及核燃料加工业	1	0	0	0	0	0	0	1	0	0	0	43.75	43.75	43.75	32.47	43.28	59.82	20.63	78.44
2020	证监会行业	制造业-纺织服装、服饰业	2	0	0	0	0	1	1	0	0	0	0	51.375	48.625	50	48.025	56.435	44.865	19.685	95.47
2020	证监会行业	制造业-计算机、通信和其他电子设备制造业	39	0	0	2	11	9	14	3	0	0	0	69.75	42.75	52.6923	52.6995	58.3336	46.2646	25.1982	93.9341
2020	证监会行业	制造业-通用设备制造业	3	0	0	0	2	0	1	0	0	0	0	62.75	49.375	56.2083	57.7033	61.7733	48.13	34.3033	89.0633
2020	证监会行业	制造业-酒、饮料和精制茶制造业	10	0	0	0	0	4	4	2	0	0	0	54.375	41.5	48.95	46.942	53.309	46.383	21.773	89.719
2020	证监会行业	制造业-金属制品业	1	0	0	0	0	0	0	0	1	0	0	40	40	40	41.56	0	40.18	13.54	79.69
2020	证监会行业	制造业-铁路、船舶、航空航天和其他运输设备制造业	10	0	0	0	3	3	3	1	0	0	0	60.125	44.25	51.875	47.658	57.183	51.852	26.209	90.376
2020	证监会行业	制造业-非金属矿物制品业	8	0	0	0	2	3	3	0	0	0	0	64.25	45.125	52.7969	52.6375	52.7988	53.0138	32.1638	83.7513
2020	证监会行业	制造业-食品制造业	3	0	0	0	1	0	1	1	0	0	0	58.875	43.375	50.375	48.4633	56.25	45.8333	24.7233	88.8567
2020	证监会行业	制造业-黑色金属冶炼和压延加工业	4	0	0	0	1	2	0	1	0	0	0	56.75	42.375	50.5625	49.5125	56.4375	44.9775	25.73	87.8125
2020	证监会行业	卫生和社会工作-卫生	4	0	0	0	0	3	0	1	0	0	0	54.125	41.875	49.7813	49.6175	51.07	48.535	23.385	89.375
2020	证监会行业	建筑业-土木工程建筑业	9	0	0	0	0	5	3	1	0	0	0	53.25	40.375	48.8333	46.7233	49.6211	50.8444	30.7878	75.9033
2020	证监会行业	房地产业-房地产业	14	0	0	0	0	2	4	4	4	0	0	54.125	34.25	43.7946	43.5286	45.7386	42.1536	20.1936	79.1971
2020	证监会行业	批发和零售业-批发业	1	0	0	0	0	0	1	0	0	0	0	46.875	46.875	46.875	48.88	45.45	46.27	27.08	76.56
2020	证监会行业	批发和零售业-零售业	6	0	0	0	0	3	3	0	0	0	0	53.75	46.375	49.8958	55.0983	49.8733	44.7133	26.25	85.3633
2020	证监会行业	教育-教育	1	0	0	0	0	0	1	0	0	0	0	49.875	49.875	49.875	53.36	43.94	52.24	21.04	93.13
2020	证监会行业	文化、体育和娱乐业-广播、电视、电影和影视录音制作业	2	0	0	0	0	1	1	0	0	0	0	52.25	46.75	49.5	53.92	50.755	43.845	19.165	95
2020	证监会行业	文化、体育和娱乐业-文化艺术业	2	0	0	0	0	1	1	0	0	0	0	50.5	47.25	48.875	50	51.895	44.78	16.46	97.5
2020	证监会行业	电力、热力、燃气及水生产和供应业-电力、热力生产和供应业	9	0	0	1	3	3	2	0	0	0	0	66	48	56.0556	53.1544	59.3022	56.5978	32.9644	90.6967
2020	证监会行业	科学研究和技术服务业-专业技术服务业	1	0	0	0	0	1	0	0	0	0	0	50.875	50.875	50.875	60.07	50.76	41.79	27.71	85.63
2020	证监会行业	科学研究和技术服务业-研究和试验发展	1	0	0	0	1	0	0	0	0	0	0	61.25	61.25	61.25	68.94	58.57	56.25	41.67	90.63
2020	证监会行业	租赁和商务服务业-商务服务业	3	0	0	0	0	1	1	1	0	0	0	50.625	43.5	46.75	52.7367	48.1067	39.4267	19.0267	88.3333
2020	证监会行业	采矿业-开采辅助活动	3	0	0	0	2	1	0	0	0	0	0	64	50.625	57.625	59.1667	62.0967	50.7167	34.5167	92.29
2020	证监会行业	采矿业-有色金属矿采选业	4	0	0	1	1	2	0	0	0	0	0	65.75	53.5	58.0313	60.7825	59.5775	52.585	43.385	80
2020	证监会行业	采矿业-煤炭开采和洗选业	4	0	0	1	1	2	0	0	0	0	0	71.875	50.25	57.9063	57.1125	61.3925	55.28	42.9175	80.39
2020	证监会行业	采矿业-石油和天然气开采业	2	0	0	0	2	0	0	0	0	0	0	57.25	56	56.625	61.095	51.41	56.035	55.105	58.905
2020	证监会行业	金融业-保险业	6	0	0	0	4	1	1	0	0	0	0	62.75	46.875	57.3542	58.665	63.2967	50.3033	37.2933	87.4483
2020	证监会行业	金融业-其他金融业	2	0	0	0	0	0	1	1	0	0	0	47	43.25	45.125	41.665	52.76	40.76	12.29	94.375
2020	证监会行业	金融业-货币金融服务	27	0	0	0	13	11	3	0	0	0	0	63	48	54.963	57.2459	56.74	51.1278	34.7856	85.2333
2020	证监会行业	金融业-资本市场服务	32	0	0	0	12	5	10	5	0	0	0	63.625	42.875	51.8359	53.5238	57.5478	44.6669	26.4009	89.9913
2020	融绿一级行业	交通运输、仓储和邮政业	18	0	0	1	3	5	4	5	0	0	0	65.75	41	50.1736	53.2472	51.3283	44.8983	25.6706	86.9278
2020	融绿一级行业	信息传输、软件和信息技术服务业	15	0	0	0	3	5	6	1	0	0	0	62	40.75	50.6917	54.648	54.1167	42.6453	21.6127	94.3133
2020	融绿一级行业	其他服务业	16	0	0	0	0	7	8	1	0	0	0	53.75	43.5	49	53.6844	49.3131	44.0069	22.6038	88.5938
2020	融绿一级行业	农、林、牧、渔业	2	0	0	0	0	1	1	0	0	0	0	52.625	49.125	50.875	47.04	57.275	48.465	24.795	90.005
2020	融绿一级行业	医药制造业	22	0	0	2	3	8	9	0	0	0	0	68.75	45.75	52.8125	57.3614	54.0027	46.3159	24.8223	94.8023
2020	融绿一级行业	卫生	5	0	0	0	1	3	0	1	0	0	0	61.25	41.875	52.075	53.482	52.57	50.078	27.042	89.626
2020	融绿一级行业	原材料加工制造业	32	0	0	1	8	7	11	4	1	0	0	71	40	51.7031	51.9381	52.1466	49.4291	28.1525	87.0322
2020	融绿一级行业	建筑业	9	0	0	0	0	5	3	1	0	0	0	53.25	40.375	48.8333	46.7233	49.6211	50.8444	30.7878	75.9033
2020	融绿一级行业	房地产业	14	0	0	0	0	2	4	4	4	0	0	54.125	34.25	43.7946	43.5286	45.7386	42.1536	20.1936	79.1971
2020	融绿一级行业	木材、纺织、服饰和文教用品制造业	4	0	0	0	0	2	1	1	0	0	0	51.75	40.125	47.9688	48.4375	51.47	43.08	18.1225	92.735
2020	融绿一级行业	汽车制造业	9	0	0	0	4	2	3	0	0	0	0	64.375	45.375	53.0694	54.8078	56.4533	46.8322	33.0089	83.16
2020	融绿一级行业	电力、热力、燃气及水的生产和供应业	9	0	0	1	3	3	2	0	0	0	0	66	48	56.0556	53.1544	59.3022	56.5978	32.9644	90.6967
2020	融绿一级行业	电气机械和器材、计算机、通信和其他电子设备制造业	51	0	0	2	13	10	21	5	0	0	0	69.75	42.75	52.0392	52.3222	57.6357	45.3012	24.4492	93.4253
2020	融绿一级行业	运输设备和通用专用设备制造业	22	0	0	0	5	6	8	3	0	0	0	62.75	40.25	50.75	48.4323	56.62	47.5309	23.7977	91.1795
2020	融绿一级行业	采矿业	13	0	0	2	6	5	0	0	0	0	0	71.875	50.25	57.6827	59.3285	59.4608	53.5138	42.9977	79.7108
2020	融绿一级行业	金融业	67	0	0	0	29	17	15	6	0	0	0	63.625	42.875	53.3899	55.1301	57.5942	47.6587	30.334	87.977
2020	融绿一级行业	食品饮料制造业	18	0	0	0	2	4	8	3	1	0	0	59.5	39.5	48.9167	45.6872	54.2689	46.8006	22.8139	88.0733
2020	融绿二级行业	互联网和相关服务	4	0	0	0	1	0	3	0	0	0	0	62	45.875	51.0313	55.8975	54.545	41.865	22.865	93.2825
2020	融绿二级行业	其他服务业	16	0	0	0	0	7	8	1	0	0	0	53.75	43.5	49	53.6844	49.3131	44.0069	22.6038	88.5938
2020	融绿二级行业	其他运输业和邮政业	11	0	0	1	1	1	3	5	0	0	0	65.75	41	48.8068	51.2282	49.4982	44.9045	23.7309	86.4218
2020	融绿二级行业	化学、橡胶、塑料和非金属矿物制品业	18	0	0	1	3	5	8	1	0	0	0	71	43.75	52.2569	52.94	53.525	49.8033	28.4394	87.9872
2020	融绿二级行业	医药制造业	22	0	0	2	3	8	9	0	0	0	0	68.75	45.75	52.8125	57.3614	54.0027	46.3159	24.8223	94.8023
2020	融绿二级行业	卫生	5	0	0	0	1	3	0	1	0	0	0	61.25	41.875	52.075	53.482	52.57	50.078	27.042	89.626
2020	融绿二级行业	土木工程建筑业	9	0	0	0	0	5	3	1	0	0	0	53.25	40.375	48.8333	46.7233	49.6211	50.8444	30.7878	75.9033
2020	融绿二级行业	房地产业	14	0	0	0	0	2	4	4	4	0	0	54.125	34.25	43.7946	43.5286	45.7386	42.1536	20.1936	79.1971
2020	融绿二级行业	文教、工美、体育和娱乐用品制造业	1	0	0	0	0	1	0	0	0	0	0	51.75	51.75	51.75	54.28	52.57	47.32	21.04	97.81
2020	融绿二级行业	木材制品制造业	1	0	0	0	0	0	0	1	0	0	0	40.125	40.125	40.125	43.42	40.44	35.27	12.08	82.19
2020	融绿二级行业	汽车制造业	9	0	0	0	4	2	3	0	0	0	0	64.375	45.375	53.0694	54.8078	56.4533	46.8322	33.0089	83.16
2020	融绿二级行业	电信、广播电视和卫星传输服务	3	0	0	0	2	0	1	0	0	0	0	58.125	45.25	52.875	55.1667	57.4533	45.5	25.8333	93.44
2020	融绿二级行业	电力、热力、燃气及水的生产和供应业	9	0	0	1	3	3	2	0	0	0	0	66	48	56.0556	53.1544	59.3022	56.5978	32.9644	90.6967
2020	融绿二级行业	电气机械和器材制造业	12	0	0	0	2	1	7	2	0	0	0	60.125	43.875	49.9167	51.0958	55.3675	42.17	22.015	91.7717
2020	融绿二级行业	畜牧业	2	0	0	0	0	1	1	0	0	0	0	52.625	49.125	50.875	47.04	57.275	48.465	24.795	90.005
2020	融绿二级行业	石油加工、炼焦及核燃料加工业	1	0	0	0	0	0	0	1	0	0	0	43.75	43.75	43.75	32.47	43.28	59.82	20.63	78.44
2020	融绿二级行业	纺织业	2	0	0	0	0	1	1	0	0	0	0	51.375	48.625	50	48.025	56.435	44.865	19.685	95.47
2020	融绿二级行业	航空运输业	7	0	0	0	2	4	1	0	0	0	0	57.25	46.25	52.3214	56.42	54.2043	44.8886	28.7186	87.7229
2020	融绿二级行业	计算机、通信和其他电子设备制造业	39	0	0	2	11	9	14	3	0	0	0	69.75	42.75	52.6923	52.6995	58.3336	46.2646	25.1982	93.9341
2020	融绿二级行业	软件和信息技术服务业	8	0	0	0	0	5	2	1	0	0	0	54.875	40.75	49.7031	53.8288	52.6513	41.965	19.4038	95.1563
2020	融绿二级行业	运输设备制造业	10	0	0	0	3	3	3	1	0	0	0	60.125	44.25	51.875	47.658	57.183	51.852	26.209	90.376
2020	融绿二级行业	通用专用设备制造业	12	0	0	0	2	3	5	2	0	0	0	62.75	40.25	49.8125	49.0775	56.1508	43.93	21.7883	91.8492
2020	融绿二级行业	采矿业	13	0	0	2	6	5	0	0	0	0	0	71.875	50.25	57.6827	59.3285	59.4608	53.5138	42.9977	79.7108
2020	融绿二级行业	金属冶炼和压延加工业	12	0	0	0	5	2	3	2	0	0	0	64.625	42.375	52.5104	52.9225	55.1633	48.7725	29.5667	86.9275
2020	融绿二级行业	金属制品业	1	0	0	0	0	0	0	0	1	0	0	40	40	40	41.56	0	40.18	13.54	79.69
2020	融绿二级行业	银行业	27	0	0	0	13	11	3	0	0	0	0	63	48	54.963	57.2459	56.74	51.1278	34.7856	85.2333
2020	融绿二级行业	非银金融业	40	0	0	0	16	6	12	6	0	0	0	63.625	42.875	52.3281	53.702	58.1708	45.317	27.3293	89.829
2020	融绿二级行业	食品饮料制造业	18	0	0	0	2	4	8	3	1	0	0	59.5	39.5	48.9167	45.6872	54.2689	46.8006	22.8139	88.0733
2021	证监会行业	交通运输、仓储和邮政业-水上运输业	3	0	0	0	1	1	1	0	0	0	0	64	49.5	55.9167	55.2933	60.9067	50.8633	34.0267	88.75
2021	证监会行业	交通运输、仓储和邮政业-航空运输业	5	0	0	0	3	1	1	0	0	0	0	58.875	48.25	54.575	58.58	54.704	49.31	32.416	87.816
2021	证监会行业	交通运输、仓储和邮政业-邮政业	3	0	0	0	0	1	1	1	0	0	0	50.875	44.375	46.7917	57.6567	40.6833	40.0867	23.1933	82.19
2021	证监会行业	交通运输、仓储和邮政业-铁路运输业	2	0	0	0	0	0	2	0	0	0	0	49.625	47.75	48.6875	47.295	47.79	51.51	18.44	94.065
2021	证监会行业	信息传输、软件和信息技术服务业-互联网和相关服务	4	0	0	0	2	0	1	1	0	0	0	62.25	44.625	53	61.4425	56.9125	39.385	28.49	89.765
2021	证监会行业	信息传输、软件和信息技术服务业-电信、广播电视和卫星传输服务	3	0	0	1	1	0	1	0	0	0	0	65.5	49.25	59.9167	65.61	64.0133	49.2033	38.89	91.4633
2021	证监会行业	信息传输、软件和信息技术服务业-软件和信息技术服务业	10	0	0	0	3	3	4	0	0	0	0	59.5	45.25	52.1	54.471	54.886	46.509	22.582	96.376
2021	证监会行业	农、林、牧、渔业-畜牧业	2	0	0	0	1	1	0	0	0	0	0	57.625	52.375	55	55.92	60.635	47.15	34.375	85.94
2021	证监会行业	制造业-专用设备制造业	15	0	0	0	3	6	4	2	0	0	0	59.88	44	50.6923	50.5693	56.1113	44.972	21.4873	94.5007
2021	证监会行业	制造业-农副食品加工业	7	0	0	0	2	2	1	1	1	0	0	61.75	38.75	50.4293	44.4557	57.5629	49.8729	26.1329	86.8757
2021	证监会行业	制造业-化学原料及化学制品制造业	8	0	0	1	2	0	4	1	0	0	0	73	44.625	52.9063	54.6663	56.3913	46.3175	27.5013	91.0163
2021	证监会行业	制造业-化学纤维制造业	5	0	0	0	2	1	2	0	0	0	0	57.625	46.875	51.551	53.57	54.552	45.178	22.336	95.376
2021	证监会行业	制造业-医药制造业	24	0	0	1	7	7	8	1	0	0	0	68.625	43.75	53.2396	58.4204	56.3733	43.9171	26.8929	92.7617
2021	证监会行业	制造业-家具制造业	1	0	0	0	0	0	0	1	0	0	0	40.375	40.375	40.375	43.42	41.18	35.27	12.5	82.19
2021	证监会行业	制造业-文教、工美、体育和娱乐用品制造业	1	0	0	0	1	0	0	0	0	0	0	56.875	56.875	56.875	63.16	57.35	47.77	29.58	97.81
2021	证监会行业	制造业-有色金属冶炼和压延加工业	6	0	0	1	3	1	1	0	0	0	0	71.875	46.25	58.4583	60.985	60.8217	52.1567	39.4133	87.0333
2021	证监会行业	制造业-橡胶和塑料制品业	5	0	0	0	1	2	2	0	0	0	0	61.625	46.25	51.925	51.818	56.416	46.7	23.792	94.124
2021	证监会行业	制造业-汽车制造业	9	0	0	0	4	2	3	0	0	0	0	61.625	47.125	53.9722	55.7678	58.8022	46.0056	34.0533	83.8556
2021	证监会行业	制造业-电气机械和器材制造业	17	0	0	2	7	1	6	1	0	0	0	69.38	45	55.3974	59.5594	58.2447	46.7041	30.2712	93.0876
2021	证监会行业	制造业-纺织业	1	0	0	0	1	0	0	0	0	0	0	60.38	60.38	60.38	63.16	60.66	56.25	38.75	92.81
2021	证监会行业	制造业-计算机、通信和其他电子设备制造业	42	0	1	4	15	8	12	2	0	0	0	75.125	44.625	54.9258	56.2967	60.6867	46.5729	28.5774	94.4493
2021	证监会行业	制造业-通用设备制造业	3	0	0	0	2	0	1	0	0	0	0	63.875	49.125	57.2083	60.9733	60.8467	48.13	37.9867	86.0433
2021	证监会行业	制造业-酒、饮料和精制茶制造业	12	0	0	0	2	5	5	0	0	0	0	58.25	45.25	51.2296	49.8625	57.3842	45.6092	24.3225	91.59
2021	证监会行业	制造业-金属制品业	2	0	0	0	0	0	1	1	0	0	0	49.25	41.875	45.5625	46.105	47.015	43.085	14.585	92.03
2021	证监会行业	制造业-铁路、船舶、航空航天和其他运输设备制造业	8	0	0	0	3	2	2	1	0	0	0	62.75	43.625	53.5625	51.1063	59.5738	50.3775	28.1	91.76
2021	证监会行业	制造业-非金属矿物制品业	7	0	0	2	2	2	1	0	0	0	0	69.375	49.375	58.0543	61.8743	57.4071	53.5714	38.3057	87.68
2021	证监会行业	制造业-食品制造业	3	0	0	0	2	1	0	0	0	0	0	60.375	51.5	55.8333	58.0033	59.93	47.9167	32.85	90.3133
2021	证监会行业	制造业-黑色金属冶炼和压延加工业	3	0	0	0	1	1	1	0	0	0	0	58.625	48.375	53.875	51.73	58.83	50.8933	33.3333	84.6867
2021	证监会行业	卫生和社会工作-卫生	5	0	0	1	1	2	1	0	0	0	0	65.5	49.75	56.7	62.046	59.07	48.594	34.71	89.688
2021	证监会行业	建筑业-土木工程建筑业	7	0	0	0	3	1	3	0	0	0	0	64.75	45.25	52.6964	52.8843	50.65	54.8486	37.9186	74.8657
2021	证监会行业	房地产业-房地产业	10	0	0	0	0	3	2	2	3	0	0	53.375	34.125	44.3	44.157	45.927	42.827	23.147	76.032
2021	证监会行业	批发和零售业-零售业	7	0	0	0	2	3	1	0	1	0	0	56.75	39.5	51.0893	57.4629	50	45.79	28.3057	85.2671
2021	证监会行业	教育-教育	1	0	0	0	0	1	0	0	0	0	0	54.25	54.25	54.25	55.6	50.38	56.72	31.25	88.75
2021	证监会行业	文化、体育和娱乐业-广播、电视、电影和影视录音制作业	1	0	0	0	0	0	0	1	0	0	0	44.625	44.625	44.625	53.36	48.48	32.09	11.04	95
2021	证监会行业	文化、体育和娱乐业-文化艺术业	2	0	0	0	0	0	2	0	0	0	0	49.25	47.5	48.375	50	50.38	44.78	15.625	97.5
2021	证监会行业	电力、热力、燃气及水生产和供应业-电力、热力生产和供应业	8	0	0	1	3	4	0	0	0	0	0	66.75	50.375	55.7975	53.28	59.3275	55.47	32.6813	90.4713
2021	证监会行业	科学研究和技术服务业-专业技术服务业	1	0	0	0	0	1	0	0	0	0	0	53.375	53.375	53.375	69.4	51.89	38.81	31.88	85.63
2021	证监会行业	科学研究和技术服务业-研究和试验发展	2	0	0	1	1	0	0	0	0	0	0	67.38	64.5	65.94	74.81	70.175	52.15	48.855	91.565
2021	证监会行业	租赁和商务服务业-商务服务业	2	0	0	0	0	0	2	0	0	0	0	48	47.25	47.625	49.07	47.915	45.895	16.67	94.06
2021	证监会行业	采矿业-开采辅助活动	1	0	0	0	1	0	0	0	0	0	0	62.75	62.75	62.75	65.63	67.34	53.88	42.29	93.44
2021	证监会行业	采矿业-有色金属矿采选业	4	0	0	0	4	0	0	0	0	0	0	64.875	55.125	60.1875	59.065	61.795	60.0225	48.23	78.125
2021	证监会行业	采矿业-煤炭开采和洗选业	3	0	0	0	1	2	0	0	0	0	0	64.875	53	57.4583	55.42	64.5167	52.7267	41.1833	81.8767
2021	证监会行业	采矿业-石油和天然气开采业	2	0	0	0	2	0	0	0	0	0	0	59.75	58	58.875	62.66	54.435	58.405	59.585	57.81
2021	证监会行业	金融业-保险业	5	0	0	1	4	0	0	0	0	0	0	70.625	57	61.95	67.62	66.4	52.392	47.376	83.814
2021	证监会行业	金融业-其他金融业	2	0	0	0	1	0	0	1	0	0	0	62.5	43.625	53.0625	58.335	58.64	42.75	25.73	94.06
2021	证监会行业	金融业-货币金融服务	23	0	0	0	13	7	3	0	0	0	0	64.375	49.375	55.6196	59.8352	56.1535	51.2448	39.2043	80.247
2021	证监会行业	金融业-资本市场服务	31	0	0	0	14	5	12	0	0	0	0	63.125	45.625	53.7742	56.0823	59.381	46.1426	30.3645	88.8926
2021	融绿一级行业	交通运输、仓储和邮政业	13	0	0	0	4	3	5	1	0	0	0	64	44.375	52.1827	55.8723	51.8362	47.8785	28.5092	87.6946
2021	融绿一级行业	信息传输、软件和信息技术服务业	17	0	0	1	6	3	6	1	0	0	0	65.5	44.625	53.6912	58.0771	56.9735	45.3082	26.85	93.9535
2021	融绿一级行业	其他服务业	14	0	0	0	2	5	5	1	1	0	0	56.75	39.5	50.1339	55.6243	49.81	44.9643	24.0643	89.2407
2021	融绿一级行业	农、林、牧、渔业	2	0	0	0	1	1	0	0	0	0	0	57.625	52.375	55	55.92	60.635	47.15	34.375	85.94
2021	融绿一级行业	医药制造业	24	0	0	1	7	7	8	1	0	0	0	68.625	43.75	53.2396	58.4204	56.3733	43.9171	26.8929	92.7617
2021	融绿一级行业	卫生	7	0	0	2	2	2	1	0	0	0	0	67.38	49.75	59.34	65.6929	62.2429	49.61	38.7514	90.2243
2021	融绿一级行业	原材料加工制造业	36	0	0	4	11	7	12	2	0	0	0	73	41.875	54.1808	55.8528	56.7575	48.7978	30.1233	90.2697
2021	融绿一级行业	建筑业	7	0	0	0	3	1	3	0	0	0	0	64.75	45.25	52.6964	52.8843	50.65	54.8486	37.9186	74.8657
2021	融绿一级行业	房地产业	10	0	0	0	0	3	2	2	3	0	0	53.375	34.125	44.3	44.157	45.927	42.827	23.147	76.032
2021	融绿一级行业	木材、纺织、服饰和文教用品制造业	3	0	0	0	2	0	0	1	0	0	0	60.38	40.375	52.5433	56.58	53.0633	46.43	26.9433	90.9367
2021	融绿一级行业	汽车制造业	9	0	0	0	4	2	3	0	0	0	0	61.625	47.125	53.9722	55.7678	58.8022	46.0056	34.0533	83.8556
2021	融绿一级行业	电力、热力、燃气及水的生产和供应业	8	0	0	1	3	4	0	0	0	0	0	66.75	50.375	55.7975	53.28	59.3275	55.47	32.6813	90.4713
2021	融绿一级行业	电气机械和器材、计算机、通信和其他电子设备制造业	59	0	1	6	22	9	18	3	0	0	0	75.125	44.625	55.0617	57.2368	59.9831	46.6107	29.0654	94.0569
2021	融绿一级行业	运输设备和通用专用设备制造业	26	0	0	0	8	8	7	3	0	0	0	63.875	43.625	52.3273	51.935	57.7231	46.9996	25.4258	92.6815
2021	融绿一级行业	采矿业	10	0	0	0	8	2	0	0	0	0	0	64.875	53	59.3625	59.347	61.694	56.896	47.793	76.719
2021	融绿一级行业	金融业	61	0	0	1	32	12	15	1	0	0	0	70.625	43.625	55.1168	58.5169	58.7151	48.4674	34.94	85.3859
2021	融绿一级行业	食品饮料制造业	22	0	0	0	6	8	6	1	1	0	0	61.75	38.75	51.6027	49.2523	57.7882	47.2805	26.0614	89.9159
2021	融绿二级行业	互联网和相关服务	4	0	0	0	2	0	1	1	0	0	0	62.25	44.625	53	61.4425	56.9125	39.385	28.49	89.765
2021	融绿二级行业	其他服务业	14	0	0	0	2	5	5	1	1	0	0	56.75	39.5	50.1339	55.6243	49.81	44.9643	24.0643	89.2407
2021	融绿二级行业	其他运输业和邮政业	8	0	0	0	1	2	4	1	0	0	0	64	44.375	50.6875	54.18	50.0438	46.9838	26.0675	87.6188
2021	融绿二级行业	化学、橡胶、塑料和非金属矿物制品业	25	0	0	3	7	5	9	1	0	0	0	73	44.625	53.8804	55.8956	56.3128	48.1972	28.7516	91.5756
2021	融绿二级行业	医药制造业	24	0	0	1	7	7	8	1	0	0	0	68.625	43.75	53.2396	58.4204	56.3733	43.9171	26.8929	92.7617
2021	融绿二级行业	卫生	7	0	0	2	2	2	1	0	0	0	0	67.38	49.75	59.34	65.6929	62.2429	49.61	38.7514	90.2243
2021	融绿二级行业	土木工程建筑业	7	0	0	0	3	1	3	0	0	0	0	64.75	45.25	52.6964	52.8843	50.65	54.8486	37.9186	74.8657
2021	融绿二级行业	房地产业	10	0	0	0	0	3	2	2	3	0	0	53.375	34.125	44.3	44.157	45.927	42.827	23.147	76.032
2021	融绿二级行业	文教、工美、体育和娱乐用品制造业	1	0	0	0	1	0	0	0	0	0	0	56.875	56.875	56.875	63.16	57.35	47.77	29.58	97.81
2021	融绿二级行业	木材制品制造业	1	0	0	0	0	0	0	1	0	0	0	40.375	40.375	40.375	43.42	41.18	35.27	12.5	82.19
2021	融绿二级行业	汽车制造业	9	0	0	0	4	2	3	0	0	0	0	61.625	47.125	53.9722	55.7678	58.8022	46.0056	34.0533	83.8556
2021	融绿二级行业	电信、广播电视和卫星传输服务	3	0	0	1	1	0	1	0	0	0	0	65.5	49.25	59.9167	65.61	64.0133	49.2033	38.89	91.4633
2021	融绿二级行业	电力、热力、燃气及水的生产和供应业	8	0	0	1	3	4	0	0	0	0	0	66.75	50.375	55.7975	53.28	59.3275	55.47	32.6813	90.4713
2021	融绿二级行业	电气机械和器材制造业	17	0	0	2	7	1	6	1	0	0	0	69.38	45	55.3974	59.5594	58.2447	46.7041	30.2712	93.0876
2021	融绿二级行业	畜牧业	2	0	0	0	1	1	0	0	0	0	0	57.625	52.375	55	55.92	60.635	47.15	34.375	85.94
2021	融绿二级行业	纺织业	1	0	0	0	1	0	0	0	0	0	0	60.38	60.38	60.38	63.16	60.66	56.25	38.75	92.81
2021	融绿二级行业	航空运输业	5	0	0	0	3	1	1	0	0	0	0	58.875	48.25	54.575	58.58	54.704	49.31	32.416	87.816
2021	融绿二级行业	计算机、通信和其他电子设备制造业	42	0	1	4	15	8	12	2	0	0	0	75.125	44.625	54.9258	56.2967	60.6867	46.5729	28.5774	94.4493
2021	融绿二级行业	软件和信息技术服务业	10	0	0	0	3	3	4	0	0	0	0	59.5	45.25	52.1	54.471	54.886	46.509	22.582	96.376
2021	融绿二级行业	运输设备制造业	8	0	0	0	3	2	2	1	0	0	0	62.75	43.625	53.5625	51.1063	59.5738	50.3775	28.1	91.76
2021	融绿二级行业	通用专用设备制造业	18	0	0	0	5	6	5	2	0	0	0	63.875	44	51.7783	52.3033	56.9006	45.4983	24.2372	93.0911
2021	融绿二级行业	采矿业	10	0	0	0	8	2	0	0	0	0	0	64.875	53	59.3625	59.347	61.694	56.896	47.793	76.719
2021	融绿二级行业	金属冶炼和压延加工业	9	0	0	1	4	2	2	0	0	0	0	71.875	46.25	56.9306	57.9	60.1578	51.7356	37.3867	86.2511
2021	融绿二级行业	金属制品业	2	0	0	0	0	0	1	1	0	0	0	49.25	41.875	45.5625	46.105	47.015	43.085	14.585	92.03
2021	融绿二级行业	银行业	23	0	0	0	13	7	3	0	0	0	0	64.375	49.375	55.6196	59.8352	56.1535	51.2448	39.2043	80.247
2021	融绿二级行业	非银金融业	38	0	0	1	19	5	12	1	0	0	0	70.625	43.625	54.8125	57.7189	60.2655	46.7863	32.3589	88.4963
2021	融绿二级行业	食品饮料制造业	22	0	0	0	6	8	6	1	1	0	0	61.75	38.75	51.6027	49.2523	57.7882	47.2805	26.0614	89.9159
2022	证监会行业	交通运输、仓储和邮政业-水上运输业	2	0	0	1	0	1	0	0	0	0	0	71.24	54.86	63.05	63.205	59.705	66.33	47.065	87.025
2022	证监会行业	交通运输、仓储和邮政业-航空运输业	5	0	0	1	2	1	1	0	0	0	0	69.03	47.47	59.114	61.452	54.052	62.314	41.51	85.518
2022	证监会行业	交通运输、仓储和邮政业-邮政业	3	0	0	1	1	0	0	1	0	0	0	70.74	44.14	56.9667	59.64	55.25	56.4567	38.9	84.0633
2022	证监会行业	交通运输、仓储和邮政业-铁路运输业	2	0	0	0	0	1	1	0	0	0	0	54.69	46.34	50.515	51.53	39.725	60.68	22.855	92
2022	证监会行业	信息传输、软件和信息技术服务业-互联网和相关服务	2	0	0	1	0	1	0	0	0	0	0	68.22	51.18	59.7	61.33	64.22	52.61	42.64	85.275
2022	证监会行业	信息传输、软件和信息技术服务业-电信、广播电视和卫星传输服务	4	0	0	1	2	1	0	0	0	0	0	68.81	51.48	59.88	67.4775	56.24	61.495	42.7525	85.5675
2022	证监会行业	信息传输、软件和信息技术服务业-软件和信息技术服务业	11	0	1	0	5	4	1	0	0	0	0	75.48	45.97	56.9355	53.81	56.6018	58.8291	35.7309	88.7464
2022	证监会行业	农、林、牧、渔业-畜牧业	2	0	0	0	2	0	0	0	0	0	0	60.1	58.91	59.505	62.265	59.26	56.53	44.86	81.485
2022	证监会行业	制造业-专用设备制造业	15	0	0	0	8	3	2	2	0	0	0	63.16	43.56	54.014	53.4887	52.192	56.3447	30.8253	88.7947
2022	证监会行业	制造业-农副食品加工业	5	0	0	1	3	1	0	0	0	0	0	66.3	50.97	59.434	63.55	55.766	59.79	43.398	83.476
2022	证监会行业	制造业-化学原料和化学制品制造业	11	0	0	0	5	1	3	2	0	0	0	63.27	43.95	53.0009	48.9809	54.0745	56.8373	33.0682	82.8982
2022	证监会行业	制造业-化学纤维制造业	5	0	0	1	2	2	0	0	0	0	0	66.27	52.2	57.312	57.62	53.364	59.754	37.042	87.714
2022	证监会行业	制造业-医药制造业	16	0	0	4	6	4	2	0	0	0	0	73.49	47.31	59.2444	63.5119	58.6906	57.1438	40.6306	87.165
2022	证监会行业	制造业-家具制造业	1	0	0	0	0	1	0	0	0	0	0	50.54	50.54	50.54	52.69	49.5	48.82	28.25	83.98
2022	证监会行业	制造业-文教、工美、体育和娱乐用品制造业	1	0	0	0	1	0	0	0	0	0	0	60.47	60.47	60.47	56.86	64.19	61.87	40.9	89.8
2022	证监会行业	制造业-有色金属冶炼和压延加工业	7	0	0	3	2	1	1	0	0	0	0	70.23	47.77	60.5429	60.0471	61.6386	60.3371	48.1286	79.1614
2022	证监会行业	制造业-橡胶和塑料制品业	3	0	0	1	1	1	0	0	0	0	0	65.53	51.83	59.1067	63.65	59.2033	53.8367	41.1267	86.0633
2022	证监会行业	制造业-汽车制造业	11	0	0	2	3	3	3	0	0	0	0	67.2	45.98	56.0718	58.18	55.0218	55.5945	37.5736	83.8191
2022	证监会行业	制造业-电气机械和器材制造业	26	0	0	7	12	2	4	1	0	0	0	72.56	42.9	58.6581	60.4273	57.3777	58.6908	41.2923	84.7058
2022	证监会行业	制造业-皮革、毛皮、羽毛及其制品和制鞋业	1	0	0	0	1	0	0	0	0	0	0	60.6	60.6	60.6	68	52.67	57.94	39.07	92.9
2022	证监会行业	制造业-石油加工、炼焦和核燃料加工业	1	0	0	0	1	0	0	0	0	0	0	55.61	55.61	55.61	43.24	62.64	64.81	48	67.02
2022	证监会行业	制造业-计算机、通信和其他电子设备制造业	38	0	0	7	15	6	9	1	0	0	0	73.9	41.49	57.6058	55.2845	58.2355	58.7018	37.7155	87.4387
2022	证监会行业	制造业-通用设备制造业	3	0	0	1	1	0	1	0	0	0	0	67.04	46.1	58.38	59.4967	61.2667	54.47	43.2667	81.04
2022	证监会行业	制造业-酒、饮料和精制茶制造业	10	0	0	0	3	5	2	0	0	0	0	64.86	46.68	53.606	57.181	50.824	53.556	31.921	86.137
2022	证监会行业	制造业-金属制品业	1	0	0	0	1	0	0	0	0	0	0	60.08	60.08	60.08	61.55	66.34	53.95	43.43	85.05
2022	证监会行业	制造业-铁路、船舶、航空航天和其他运输设备制造业	7	0	0	0	4	2	1	0	0	0	0	63.96	45.11	55.7871	51.76	55.6529	59.1029	34.1243	88.28
2022	证监会行业	制造业-非金属矿物制品业	7	0	0	2	4	1	0	0	0	0	0	71.67	52.7	60.7371	63.8	57.36	59.6214	46.09	82.7029
2022	证监会行业	制造业-食品制造业	2	0	0	0	2	0	0	0	0	0	0	59.27	56.31	57.79	63.475	59.94	51.705	40.14	84.26
2022	证监会行业	制造业-黑色金属冶炼和压延加工业	4	0	0	1	1	1	1	0	0	0	0	68.38	48.05	57.1825	54.23	55.3675	61.8475	41.455	80.78
2022	证监会行业	卫生和社会工作-卫生	3	0	0	0	2	1	0	0	0	0	0	64.43	50.12	57.55	64.6367	56.66	54.3767	41.9067	81.0167
2022	证监会行业	建筑业-土木工程建筑业	10	0	0	1	6	1	1	1	0	0	0	65.9	41.18	55.271	55.163	51.845	58.689	36.693	83.131
2022	证监会行业	房地产业-房地产业	6	0	0	0	5	1	0	0	0	0	0	61.76	50.54	56.6367	52.73	58.8	57.1633	41.8717	78.785
2022	证监会行业	批发和零售业-零售业	1	0	0	0	0	0	1	0	0	0	0	47.69	47.69	47.69	43.52	48.6	48.61	24.4	82.62
2022	证监会行业	文化、体育和娱乐业-文化艺术业	1	0	0	0	1	0	0	0	0	0	0	58.82	58.82	58.82	72.59	52.48	60.26	38.33	89.55
2022	证监会行业	电力、热力、燃气及水生产和供应业-燃气生产和供应业	1	0	0	1	0	0	0	0	0	0	0	69.1	69.1	69.1	75.27	61.4	65.74	59.57	83.4
2022	证监会行业	电力、热力、燃气及水生产和供应业-电力、热力生产和供应业	10	0	0	2	3	3	1	1	0	0	0	66.06	44.29	55.577	51.645	55.078	60.885	35.755	85.299
2022	证监会行业	科学研究和技术服务业-研究和试验发展	3	0	1	1	1	0	0	0	0	0	0	75.14	64.75	70.05	73.8567	71.8767	65.91	57.5067	88.8667
2022	证监会行业	租赁和商务服务业-商务服务业	2	0	0	0	1	0	1	0	0	0	0	60.22	46.41	53.315	49.64	50.845	58.56	28.975	89.825
2022	证监会行业	采矿业-开采辅助活动	1	0	0	0	1	0	0	0	0	0	0	63.87	63.87	63.87	64.3	60.13	66.13	49.45	85.5
2022	证监会行业	采矿业-有色金属矿采选业	3	0	0	2	1	0	0	0	0	0	0	69.85	55.69	65.06	67.7533	61.1333	65.37	55.0067	80.14
2022	证监会行业	采矿业-煤炭开采和洗选业	4	0	0	2	1	0	1	0	0	0	0	71.17	48.51	62.0675	63.3575	60.9625	61.6725	50.285	79.7525
2022	证监会行业	采矿业-石油和天然气开采业	2	0	0	1	1	0	0	0	0	0	0	69.63	62.09	65.86	65.985	62.52	68.12	60.905	73.29
2022	证监会行业	金融业-保险业	5	0	0	2	3	0	0	0	0	0	0	66.11	59.45	62.552	68.502	59.434	64.228	49.06	82.788
2022	证监会行业	金融业-其他金融业	1	0	0	0	0	0	0	1	0	0	0	43.22	43.22	43.22	41.95	38.82	49.25	14.6	86.15
2022	证监会行业	金融业-货币金融服务	21	0	0	5	10	5	1	0	0	0	0	72.1	48.31	59.7838	61.5833	54.971	65.159	45.8057	80.7562
2022	证监会行业	金融业-资本市场服务	20	0	0	5	11	3	1	0	0	0	0	74.14	49.78	60.185	58.304	57.5935	64.165	43.713	84.894
2022	融绿一级行业	交通运输、仓储和邮政业	12	0	0	3	3	3	2	1	0	0	0	71.24	44.14	57.8	59.6375	52.9058	61.2467	38.6742	86.4858
2022	融绿一级行业	信息传输、软件和信息技术服务业	17	0	1	2	7	6	1	0	0	0	0	75.48	45.97	57.9535	57.9106	57.4129	58.7247	38.1959	87.59
2022	融绿一级行业	其他服务业	4	0	0	0	2	0	2	0	0	0	0	60.22	46.41	53.285	53.8475	50.6925	56.4975	30.17	87.955
2022	融绿一级行业	农、林、牧、渔业	2	0	0	0	2	0	0	0	0	0	0	60.1	58.91	59.505	62.265	59.26	56.53	44.86	81.485
2022	融绿一级行业	医药制造业	16	0	0	4	6	4	2	0	0	0	0	73.49	47.31	59.2444	63.5119	58.6906	57.1438	40.6306	87.165
2022	融绿一级行业	卫生服务业	6	0	1	1	3	1	0	0	0	0	0	75.14	50.12	63.8	69.2467	64.2683	60.1433	49.7067	84.9417
2022	融绿一级行业	原材料加工制造业	39	0	0	8	17	7	5	2	0	0	0	71.67	43.95	57.4428	56.5764	56.9921	58.7526	40.7467	82.4841
2022	融绿一级行业	建筑业	11	0	0	1	7	1	1	1	0	0	0	65.9	41.18	55.8209	55.3991	52.8136	59.0364	37.0318	83.9982
2022	融绿一级行业	房地产业	6	0	0	0	5	1	0	0	0	0	0	61.76	50.54	56.6367	52.73	58.8	57.1633	41.8717	78.785
2022	融绿一级行业	木材、纺织、服饰和文教用品制造业	3	0	0	0	2	1	0	0	0	0	0	60.6	50.54	57.2033	59.1833	55.4533	56.21	36.0733	88.8933
2022	融绿一级行业	汽车制造业	11	0	0	2	3	3	3	0	0	0	0	67.2	45.98	56.0718	58.18	55.0218	55.5945	37.5736	83.8191
2022	融绿一级行业	电力、热力、燃气及水的生产和供应业	11	0	0	3	3	3	1	1	0	0	0	69.1	44.29	56.8064	53.7927	55.6527	61.3264	37.92	85.1264
2022	融绿一级行业	电气机械和器材、计算机、通信和其他电子设备制造业	64	0	0	14	27	8	13	2	0	0	0	73.9	41.49	58.0333	57.3738	57.887	58.6973	39.1686	86.3284
2022	融绿一级行业	运输设备和通用专用设备制造业	24	0	0	1	12	5	4	2	0	0	0	67.04	43.56	54.7725	53.5575	53.9063	56.6579	32.9429	87.5138
2022	融绿一级行业	采矿业	10	0	0	5	4	0	1	0	0	0	0	71.17	48.51	63.904	65.296	61.242	64.517	53.742	79.151
2022	融绿一级行业	金融业	47	0	0	12	24	8	2	1	0	0	0	74.14	43.22	59.8966	60.5062	56.2181	64.2985	44.5974	82.8479
2022	融绿一级行业	食品饮料制造业	17	0	0	1	8	6	2	0	0	0	0	66.3	46.68	55.8124	59.7947	53.35	55.1718	36.2635	85.1335
2022	融绿二级行业	专用设备制造业	15	0	0	0	8	3	2	2	0	0	0	63.16	43.56	54.014	53.4887	52.192	56.3447	30.8253	88.7947
2022	融绿二级行业	中药制造业	4	0	0	2	1	1	0	0	0	0	0	67.87	54.04	63.4425	67.745	64.68	59.715	48.8775	85.2925
2022	融绿二级行业	互联网和相关服务	2	0	0	1	0	1	0	0	0	0	0	68.22	51.18	59.7	61.33	64.22	52.61	42.64	85.275
2022	融绿二级行业	其他矿物采选业和开采辅助活动	4	0	0	2	2	0	0	0	0	0	0	69.85	55.69	64.7625	66.89	60.8825	65.56	53.6175	81.48
2022	融绿二级行业	其他运输业和邮政业	3	0	0	1	1	0	0	1	0	0	0	70.74	44.14	56.9667	59.64	55.25	56.4567	38.9	84.0633
2022	融绿二级行业	化学、橡胶、塑料和非金属矿物制品业	26	0	0	4	12	5	3	2	0	0	0	71.67	43.95	56.6173	56.3246	55.4142	57.8015	38.2681	84.1369
2022	融绿二级行业	化学、生物药品制造业和其他医药制造业	12	0	0	2	5	3	2	0	0	0	0	73.49	47.31	57.845	62.1008	56.6942	56.2867	37.8817	87.7892
2022	融绿二级行业	卫生服务业	6	0	1	1	3	1	0	0	0	0	0	75.14	50.12	63.8	69.2467	64.2683	60.1433	49.7067	84.9417
2022	融绿二级行业	商务服务、批发、零售和其他服务业	3	0	0	0	1	0	2	0	0	0	0	60.22	46.41	51.44	47.6	50.0967	55.2433	27.45	87.4233
2022	融绿二级行业	土木工程建筑业	11	0	0	1	7	1	1	1	0	0	0	65.9	41.18	55.8209	55.3991	52.8136	59.0364	37.0318	83.9982
2022	融绿二级行业	房地产业	6	0	0	0	5	1	0	0	0	0	0	61.76	50.54	56.6367	52.73	58.8	57.1633	41.8717	78.785
2022	融绿二级行业	教育和文娱业	1	0	0	0	1	0	0	0	0	0	0	58.82	58.82	58.82	72.59	52.48	60.26	38.33	89.55
2022	融绿二级行业	文教、工美、体育和娱乐用品制造业	1	0	0	0	1	0	0	0	0	0	0	60.47	60.47	60.47	56.86	64.19	61.87	40.9	89.8
2022	融绿二级行业	木材制品制造业	1	0	0	0	0	1	0	0	0	0	0	50.54	50.54	50.54	52.69	49.5	48.82	28.25	83.98
2022	融绿二级行业	水上运输业	2	0	0	1	0	1	0	0	0	0	0	71.24	54.86	63.05	63.205	59.705	66.33	47.065	87.025
2022	融绿二级行业	汽车制造业	11	0	0	2	3	3	3	0	0	0	0	67.2	45.98	56.0718	58.18	55.0218	55.5945	37.5736	83.8191
2022	融绿二级行业	煤炭开采和洗选业	4	0	0	2	1	0	1	0	0	0	0	71.17	48.51	62.0675	63.3575	60.9625	61.6725	50.285	79.7525
2022	融绿二级行业	电信、广播电视和卫星传输服务	4	0	0	1	2	1	0	0	0	0	0	68.81	51.48	59.88	67.4775	56.24	61.495	42.7525	85.5675
2022	融绿二级行业	电力、热力、燃气的生产和供应业	11	0	0	3	3	3	1	1	0	0	0	69.1	44.29	56.8064	53.7927	55.6527	61.3264	37.92	85.1264
2022	融绿二级行业	电气机械和器材制造业	26	0	0	7	12	2	4	1	0	0	0	72.56	42.9	58.6581	60.4273	57.3777	58.6908	41.2923	84.7058
2022	融绿二级行业	畜牧业	2	0	0	0	2	0	0	0	0	0	0	60.1	58.91	59.505	62.265	59.26	56.53	44.86	81.485
2022	融绿二级行业	石油加工、炼焦和核燃料加工业	1	0	0	0	1	0	0	0	0	0	0	55.61	55.61	55.61	43.24	62.64	64.81	48	67.02
2022	融绿二级行业	石油和天然气开采业	2	0	0	1	1	0	0	0	0	0	0	69.63	62.09	65.86	65.985	62.52	68.12	60.905	73.29
2022	融绿二级行业	羽毛皮革制品业	1	0	0	0	1	0	0	0	0	0	0	60.6	60.6	60.6	68	52.67	57.94	39.07	92.9
2022	融绿二级行业	航空运输业	5	0	0	1	2	1	1	0	0	0	0	69.03	47.47	59.114	61.452	54.052	62.314	41.51	85.518
2022	融绿二级行业	计算机、通信和其他电子设备制造业	38	0	0	7	15	6	9	1	0	0	0	73.9	41.49	57.6058	55.2845	58.2355	58.7018	37.7155	87.4387
2022	融绿二级行业	软件和信息技术服务业	11	0	1	0	5	4	1	0	0	0	0	75.48	45.97	56.9355	53.81	56.6018	58.8291	35.7309	88.7464
2022	融绿二级行业	运输设备制造业	6	0	0	0	3	2	1	0	0	0	0	63.96	45.11	54.865	50.76	54.5117	58.535	33.075	87.5483
2022	融绿二级行业	通用设备制造业	3	0	0	1	1	0	1	0	0	0	0	67.04	46.1	58.38	59.4967	61.2667	54.47	43.2667	81.04
2022	融绿二级行业	道路运输业	2	0	0	0	0	1	1	0	0	0	0	54.69	46.34	50.515	51.53	39.725	60.68	22.855	92
2022	融绿二级行业	金属冶炼和压延加工业	11	0	0	4	3	2	2	0	0	0	0	70.23	47.77	59.3209	57.9318	59.3582	60.8864	45.7018	79.75
2022	融绿二级行业	金属制品业	1	0	0	0	1	0	0	0	0	0	0	60.08	60.08	60.08	61.55	66.34	53.95	43.43	85.05
2022	融绿二级行业	银行业	21	0	0	5	10	5	1	0	0	0	0	72.1	48.31	59.7838	61.5833	54.971	65.159	45.8057	80.7562
2022	融绿二级行业	非银金融业	26	0	0	7	14	3	1	1	0	0	0	74.14	43.22	59.9877	59.6362	57.2254	63.6035	43.6215	84.5373
2022	融绿二级行业	食品饮料制造业	17	0	0	1	8	6	2	0	0	0	0	66.3	46.68	55.8124	59.7947	53.35	55.1718	36.2635	85.1335
2023	证监会行业	交通运输、仓储和邮政业-水上运输业	3	0	0	1	2	0	0	0	0	0	0	70.1	57.82	64.15	69.84	61.54	62.0233	47.52	89.1
2023	证监会行业	交通运输、仓储和邮政业-航空运输业	5	0	0	3	1	0	1	0	0	0	0	69.14	47.88	61.858	63.958	58.902	63.106	44.596	87.75
2023	证监会行业	交通运输、仓储和邮政业-邮政业	3	0	1	0	0	1	1	0	0	0	0	76.66	47.59	59.4667	59.98	59.7033	58.7933	45.2933	80.7333
2023	证监会行业	交通运输、仓储和邮政业-铁路运输业	2	0	0	0	0	1	1	0	0	0	0	54.8	49.63	52.215	53.255	44.365	59.335	26.455	90.855
2023	证监会行业	住宿和餐饮业-住宿业	1	0	0	0	1	0	0	0	0	0	0	61.51	61.51	61.51	55.84	67.58	56.28	43.88	87.96
2023	证监会行业	信息传输、软件和信息技术服务业-互联网和相关服务	2	0	0	1	1	0	0	0	0	0	0	71.51	55.04	63.275	60.175	65.55	61.485	48.27	85.785
2023	证监会行业	信息传输、软件和信息技术服务业-电信、广播电视和卫星传输服务	4	0	0	1	3	0	0	0	0	0	0	70.61	55.51	63.155	68.205	61.285	64.2025	49.035	84.335
2023	证监会行业	信息传输、软件和信息技术服务业-软件和信息技术服务业	10	0	0	2	6	2	0	0	0	0	0	69.69	52.38	61.02	57.114	61.762	61.759	42.445	88.878
2023	证监会行业	农、林、牧、渔业-畜牧业	2	0	0	0	2	0	0	0	0	0	0	62.64	61.13	61.885	66	59.755	58.7	49.25	80.83
2023	证监会行业	制造业-专用设备制造业	12	0	0	3	8	0	1	0	0	0	0	69.75	49.22	61.5292	62.62	59.505	62.7608	42.8933	89.4817
2023	证监会行业	制造业-农副食品加工业	5	0	0	2	2	0	1	0	0	0	0	72.33	47	62.458	67.152	59.78	61.57	50.196	80.852
2023	证监会行业	制造业-化学原料和化学制品制造业	11	0	0	2	6	0	1	2	0	0	0	68.64	43.89	57.8009	56.7418	57.4655	59.2564	42.4064	80.8927
2023	证监会行业	制造业-化学纤维制造业	5	0	0	1	3	1	0	0	0	0	0	66.85	52.75	60.878	63.71	59.63	58.518	44.148	85.97
2023	证监会行业	制造业-医药制造业	16	0	0	8	4	4	0	0	0	0	0	72.16	50.05	63.4381	68.5856	63.0481	60.6763	47.75	86.9713
2023	证监会行业	制造业-家具制造业	1	0	0	0	0	1	0	0	0	0	0	53.51	53.51	53.51	58.07	49.48	51.22	32.96	84.33
2023	证监会行业	制造业-文教、工美、体育和娱乐用品制造业	1	0	0	1	0	0	0	0	0	0	0	67.61	67.61	67.61	67.16	70.06	66.36	52.87	89.72
2023	证监会行业	制造业-有色金属冶炼和压延加工业	7	0	2	4	0	1	0	0	0	0	0	75.24	54.15	70.1429	75.5243	64.7314	67.8114	62.3186	81.8843
2023	证监会行业	制造业-橡胶和塑料制品业	2	0	0	1	1	0	0	0	0	0	0	70.64	57.01	63.825	65.71	64.925	60.88	51.23	82.715
2023	证监会行业	制造业-汽车制造业	11	0	0	5	3	0	3	0	0	0	0	73.86	45.55	61.1736	64.8218	59.7273	60.3245	44.2755	86.5218
2023	证监会行业	制造业-电气机械和器材制造业	27	0	2	12	9	3	0	1	0	0	0	75.78	44.83	64.5996	70.4356	63.5489	61.2641	51.5093	84.237
2023	证监会行业	制造业-皮革、毛皮、羽毛及其制品和制鞋业	1	0	0	0	1	0	0	0	0	0	0	59.14	59.14	59.14	61.38	57.12	58.07	40.97	86.4
2023	证监会行业	制造业-石油加工、炼焦和核燃料加工业	1	0	0	0	0	1	0	0	0	0	0	52.87	52.87	52.87	38.85	59.88	63.97	45.62	63.74
2023	证监会行业	制造业-计算机、通信和其他电子设备制造业	37	0	0	15	14	5	2	1	0	0	0	74.5	43.1	62.4281	61.0665	63.0322	62.7976	45.0581	88.4843
2023	证监会行业	制造业-通用设备制造业	4	0	0	2	1	0	1	0	0	0	0	69	47.6	61.445	63.3325	61.9675	59.385	47.065	83.015
2023	证监会行业	制造业-酒、饮料和精制茶制造业	10	0	0	5	4	1	0	0	0	0	0	70.08	54.94	63.289	68.198	60.088	62.648	48.086	86.089
2023	证监会行业	制造业-铁路、船舶、航空航天和其他运输设备制造业	7	0	0	1	4	2	0	0	0	0	0	66.08	51.59	57.6729	55.6671	56.7786	60.22	38.2386	86.8286
2023	证监会行业	制造业-非金属矿物制品业	7	0	0	4	3	0	0	0	0	0	0	73.77	59.85	66.7114	69.3543	65.0429	64.8743	56.3243	82.2914
2023	证监会行业	制造业-食品制造业	2	0	0	1	1	0	0	0	0	0	0	70.16	64.27	67.215	78.52	66.575	59.6	54.34	86.525
2023	证监会行业	制造业-黑色金属冶炼和压延加工业	4	0	0	1	1	0	2	0	0	0	0	70.02	47.13	56.4475	51.2875	55.9925	62.685	41.43	78.9725
2023	证监会行业	卫生和社会工作-卫生	2	0	0	1	0	1	0	0	0	0	0	65.8	54.58	60.19	67.095	60.86	55.48	48.695	77.44
2023	证监会行业	建筑业-土木工程建筑业	10	0	0	2	4	2	1	1	0	0	0	67.69	44.02	57.855	59.996	53.937	60.219	42.887	80.305
2023	证监会行业	房地产业-房地产业	6	0	0	1	5	0	0	0	0	0	0	66.77	57.39	61.175	60.1967	64.54	58.8183	48.8283	79.6917
2023	证监会行业	批发和零售业-零售业	2	0	0	0	2	0	0	0	0	0	0	62.73	58.52	60.625	61.57	59.305	61.975	46.675	81.56
2023	证监会行业	文化、体育和娱乐业-文化艺术业	1	0	0	0	1	0	0	0	0	0	0	57.59	57.59	57.59	65.93	53.58	59.41	35.58	90.59
2023	证监会行业	电力、热力、燃气及水生产和供应业-燃气生产和供应业	1	0	1	0	0	0	0	0	0	0	0	76.23	76.23	76.23	81.44	70.11	73.17	71.74	82.97
2023	证监会行业	电力、热力、燃气及水生产和供应业-电力、热力生产和供应业	10	0	0	4	5	1	0	0	0	0	0	72.83	50.2	63.903	62.863	63.919	65.224	50.547	83.938
2023	证监会行业	科学研究和技术服务业-研究和试验发展	3	0	1	2	0	0	0	0	0	0	0	78.46	69.65	73.0567	77.2067	74.7633	68.8433	61.9233	89.7533
2023	证监会行业	租赁和商务服务业-商务服务业	2	0	0	1	1	0	0	0	0	0	0	74.27	57.57	65.92	60.565	66.935	67.3	47.85	93.02
2023	证监会行业	采矿业-开采辅助活动	1	0	0	1	0	0	0	0	0	0	0	67.03	67.03	67.03	68.59	66.06	66.28	52.36	89.03
2023	证监会行业	采矿业-有色金属矿采选业	3	0	1	1	1	0	0	0	0	0	0	78.4	62.05	70.1733	70.8933	69.9067	69.7067	66.1067	76.28
2023	证监会行业	采矿业-煤炭开采和洗选业	6	0	0	2	1	2	1	0	0	0	0	70.44	45.74	59.01	58.68	55.6983	61.6983	48.4033	74.9233
2023	证监会行业	采矿业-石油和天然气开采业	2	0	0	1	1	0	0	0	0	0	0	72.92	64.02	68.47	68.46	65.885	70.325	69.14	67.475
2023	证监会行业	金融业-保险业	5	0	0	3	2	0	0	0	0	0	0	72.97	60.36	66.86	74.132	64.96	66.508	56.772	81.994
2023	证监会行业	金融业-其他金融业	1	0	0	0	0	0	0	1	0	0	0	44.78	44.78	44.78	43.13	38.63	54.18	19.87	82.14
2023	证监会行业	金融业-货币金融服务	21	0	0	5	14	2	0	0	0	0	0	70.59	50.36	62.0529	66.431	58.6105	64.7281	49.7629	80.489
2023	证监会行业	金融业-资本市场服务	21	0	0	6	13	2	0	0	0	0	0	73.85	52.85	62.6019	62.6214	59.8471	66.0662	47.2938	85.5648
2023	融绿一级行业	交通运输、仓储和邮政业	13	0	1	4	3	2	3	0	0	0	0	76.66	47.59	60.3515	62.7508	57.4592	61.2808	42.6408	86.92
2023	融绿一级行业	信息传输、软件和信息技术服务业	18	0	0	4	10	3	0	1	0	0	0	71.51	44.78	60.5261	60.3317	59.875	61.5222	42.7522	87.185
2023	融绿一级行业	其他服务业	4	0	0	1	3	0	0	0	0	0	0	74.27	57.57	64.02	62.7125	65.8125	62.2825	47.3375	89.045
2023	融绿一级行业	农、林、牧、渔业	3	0	0	0	3	0	0	0	0	0	0	62.64	59.64	61.1367	63.1233	58.4467	60.7933	47.3867	81.76
2023	融绿一级行业	医药制造业	16	0	0	7	5	4	0	0	0	0	0	72.16	50.05	62.7994	66.8413	62.3781	60.7125	47.1363	86.2963
2023	融绿一级行业	卫生服务业	6	0	1	4	0	1	0	0	0	0	0	78.46	54.58	68.0483	73.83	68.9233	63.7683	56.0933	85.98
2023	融绿一级行业	原材料加工制造业	39	0	2	14	15	3	3	2	0	0	0	75.24	43.89	62.6008	63.3128	61.1323	62.829	50.5074	80.7413
2023	融绿一级行业	建筑业	9	0	0	2	4	2	1	0	0	0	0	67.69	45.88	59.3922	62.59	55.3656	61.2222	45.4211	80.3478
2023	融绿一级行业	房地产业	7	0	0	1	5	0	0	1	0	0	0	66.77	44.02	58.7243	56.8329	61.1886	57.7286	44.7214	79.7243
2023	融绿一级行业	木材、纺织、服饰和文教用品制造业	3	0	0	1	1	1	0	0	0	0	0	67.61	53.51	60.0867	62.2033	58.8867	58.55	42.2667	86.8167
2023	融绿一级行业	汽车制造业	6	0	0	3	3	0	0	0	0	0	0	73.86	58.01	64.8833	70.995	64.2867	60.83	51.5367	84.9033
2023	融绿一级行业	电力、热力、燃气及水的生产和供应业	11	0	1	4	5	1	0	0	0	0	0	76.23	50.2	65.0236	64.5518	64.4818	65.9464	52.4736	83.85
2023	融绿一级行业	电气机械和器材、计算机、通信和其他电子设备制造业	70	0	2	29	25	7	5	2	0	0	0	75.78	43.1	62.9099	64.3706	62.6983	62.0191	47.029	86.7324
2023	融绿一级行业	运输设备和通用专用设备制造业	23	0	0	6	13	2	2	0	0	0	0	69.75	47.6	60.3409	60.6278	59.1035	61.4004	42.2022	87.5496
2023	融绿一级行业	采矿业	10	0	1	4	2	2	1	0	0	0	0	78.4	45.74	63.161	63.335	60.997	64.559	54.11	76.741
2023	融绿一级行业	金融业	47	0	0	14	29	4	0	0	0	0	0	73.85	50.36	62.8096	65.5481	59.8385	65.5153	49.4053	82.917
2023	融绿一级行业	食品饮料制造业	15	0	0	8	5	1	1	0	0	0	0	72.33	47	63.746	69.8107	61.0553	61.8	49.572	85.0027
2023	融绿二级行业	专用设备制造业	11	0	0	3	7	0	1	0	0	0	0	69.75	49.22	61.9845	62.93	60.0864	63.2018	43.7936	89.27
2023	融绿二级行业	中药制造业	4	0	0	3	0	1	0	0	0	0	0	68.74	50.05	63.225	71.905	63.215	57.9325	50.985	81.5825
2023	融绿二级行业	互联网和相关服务	2	0	0	1	1	0	0	0	0	0	0	71.51	57.59	64.55	70.055	65.78	60.295	48.91	88.005
2023	融绿二级行业	住宿和餐饮业	1	0	0	0	1	0	0	0	0	0	0	61.51	61.51	61.51	55.84	67.58	56.28	43.88	87.96
2023	融绿二级行业	其他矿物采选业和开采辅助活动	4	0	1	2	1	0	0	0	0	0	0	78.4	62.05	69.3875	70.3175	68.945	68.85	62.67	79.4675
2023	融绿二级行业	其他运输业和邮政业	3	0	1	0	0	1	1	0	0	0	0	76.66	47.59	59.4667	59.98	59.7033	58.7933	45.2933	80.7333
2023	融绿二级行业	化学、橡胶、塑料和非金属矿物制品业	22	0	0	8	10	1	1	2	0	0	0	73.77	43.89	61.3655	62.3018	60.5023	60.9095	47.6064	82.0036
2023	融绿二级行业	化学、生物药品制造业和其他医药制造业	12	0	0	4	5	3	0	0	0	0	0	72.16	52.75	62.6575	65.1533	62.0992	61.6392	45.8533	87.8675
2023	融绿二级行业	卫生服务业	6	0	1	4	0	1	0	0	0	0	0	78.46	54.58	68.0483	73.83	68.9233	63.7683	56.0933	85.98
2023	融绿二级行业	商务服务、批发、零售和其他服务业	3	0	0	1	2	0	0	0	0	0	0	74.27	57.57	64.8567	65.0033	65.2233	64.2833	48.49	89.4067
2023	融绿二级行业	土木工程建筑业	9	0	0	2	4	2	1	0	0	0	0	67.69	45.88	59.3922	62.59	55.3656	61.2222	45.4211	80.3478
2023	融绿二级行业	房地产业	7	0	0	1	5	0	0	1	0	0	0	66.77	44.02	58.7243	56.8329	61.1886	57.7286	44.7214	79.7243
2023	融绿二级行业	文教、工美、体育和娱乐用品制造业	1	0	0	1	0	0	0	0	0	0	0	67.61	67.61	67.61	67.16	70.06	66.36	52.87	89.72
2023	融绿二级行业	木材制品制造业	1	0	0	0	0	1	0	0	0	0	0	53.51	53.51	53.51	58.07	49.48	51.22	32.96	84.33
2023	融绿二级行业	水上运输业	3	0	0	1	2	0	0	0	0	0	0	70.1	57.82	64.15	69.84	61.54	62.0233	47.52	89.1
2023	融绿二级行业	汽车制造业	6	0	0	3	3	0	0	0	0	0	0	73.86	58.01	64.8833	70.995	64.2867	60.83	51.5367	84.9033
2023	融绿二级行业	煤炭开采和洗选业	6	0	0	2	1	2	1	0	0	0	0	70.44	45.74	59.01	58.68	55.6983	61.6983	48.4033	74.9233
2023	融绿二级行业	电信、广播电视和卫星传输服务	3	0	0	1	2	0	0	0	0	0	0	70.61	62.33	65.7033	74.94	62.52	65.93	54.6733	82.25
2023	融绿二级行业	电力、热力、燃气的生产和供应业	11	0	1	4	5	1	0	0	0	0	0	76.23	50.2	65.0236	64.5518	64.4818	65.9464	52.4736	83.85
2023	融绿二级行业	电气机械和器材制造业	33	0	2	14	10	3	3	1	0	0	0	75.78	44.83	63.353	68.1539	62.183	60.94	49.0967	84.7388
2023	融绿二级行业	畜牧业	3	0	0	0	3	0	0	0	0	0	0	62.64	59.64	61.1367	63.1233	58.4467	60.7933	47.3867	81.76
2023	融绿二级行业	石油加工、炼焦和核燃料加工业	6	0	0	1	4	1	0	0	0	0	0	72.92	52.87	62.4333	60.79	62.67	64.15	53.4167	75.9583
2023	融绿二级行业	羽毛皮革制品业	1	0	0	0	1	0	0	0	0	0	0	59.14	59.14	59.14	61.38	57.12	58.07	40.97	86.4
2023	融绿二级行业	航空运输业	5	0	0	3	1	0	1	0	0	0	0	69.14	47.88	61.858	63.958	58.902	63.106	44.596	87.75
2023	融绿二级行业	计算机、通信和其他电子设备制造业	37	0	0	15	15	4	2	1	0	0	0	74.5	43.1	62.5146	60.9962	63.1578	62.9816	45.1849	88.5105
2023	融绿二级行业	软件和信息技术服务业	13	0	0	2	7	3	0	1	0	0	0	70.62	44.78	58.7123	55.4646	58.3562	60.6938	39.0538	88.1977
2023	融绿二级行业	运输设备制造业	7	0	0	1	4	2	0	0	0	0	0	66.08	51.59	57.6729	55.6671	56.7786	60.22	38.2386	86.8286
2023	融绿二级行业	通用设备制造业	5	0	0	2	2	0	1	0	0	0	0	69	47.6	60.46	62.508	60.196	59.09	44.25	84.774
2023	融绿二级行业	道路运输业	2	0	0	0	0	1	1	0	0	0	0	54.8	49.63	52.215	53.255	44.365	59.335	26.455	90.855
2023	融绿二级行业	金属冶炼和压延加工业	11	0	2	5	1	1	2	0	0	0	0	75.24	47.13	65.1627	66.7109	61.5536	65.9473	54.7227	80.8255
2023	融绿二级行业	银行业	21	0	0	5	14	2	0	0	0	0	0	70.59	50.36	62.0529	66.431	58.6105	64.7281	49.7629	80.489
2023	融绿二级行业	非银金融业	26	0	0	9	15	2	0	0	0	0	0	73.85	52.85	63.4208	64.835	60.8304	66.1512	49.1165	84.8781
2023	融绿二级行业	食品饮料制造业	15	0	0	8	5	1	1	0	0	0	0	72.33	47	63.746	69.8107	61.0553	61.8	49.572	85.0027
2015	证监会行业	（已退市）	1	0	0	0	0	0	0	1	0	0	0	42.75	42.75	42.75	39.29	51.49	37.05	14.38	85.31
2024	证监会行业	交通运输、仓储和邮政业-水上运输业	4	0	2	1	1	0	0	0	0	0	0	78.4	58.36	70.9725	75.465	68.385	69.835	57.5	91.1875
2024	证监会行业	交通运输、仓储和邮政业-航空运输业	5	0	0	3	1	0	1	0	0	0	0	72.15	46.72	63.364	65.654	59.084	65.802	46.95	87.992
2024	证监会行业	交通运输、仓储和邮政业-道路运输业	1	0	0	1	0	0	0	0	0	0	0	65.57	65.57	65.57	72.89	62.67	62.37	47.23	93.07
2024	证监会行业	交通运输、仓储和邮政业-邮政业	2	0	1	0	0	0	1	0	0	0	0	76.87	47.99	62.43	66.935	61.32	59.77	50.67	80.08
2024	证监会行业	交通运输、仓储和邮政业-铁路运输业	2	0	0	0	1	1	0	0	0	0	0	59.82	51.19	55.505	60.08	46.85	60.48	33.31	88.795
2024	证监会行业	信息传输、软件和信息技术服务业-互联网和相关服务	5	0	0	2	1	1	0	1	0	0	0	71.6	44.64	59.206	62.978	58.442	58.554	39.126	89.326
2024	证监会行业	信息传输、软件和信息技术服务业-电信、广播电视和卫星传输服务	4	0	0	3	1	0	0	0	0	0	0	72.98	56.18	65.49	73.575	62.3325	66.34	53.2625	83.8325
2024	证监会行业	信息传输、软件和信息技术服务业-软件和信息技术服务业	11	0	0	5	5	1	0	0	0	0	0	72.93	54.58	64.4191	64.9764	64.5218	64.1073	48.3955	88.4509
2024	证监会行业	农、林、牧、渔业-畜牧业	2	0	0	2	0	0	0	0	0	0	0	70.78	70.41	70.595	78.3	64.39	66.215	62.075	83.37
2024	证监会行业	制造业-专用设备制造业	12	0	1	6	5	0	0	0	0	0	0	76.17	61.46	67.2533	67.9225	66.4942	67.5017	51.5742	90.7667
2024	证监会行业	制造业-农副食品加工业	4	0	1	2	0	1	0	0	0	0	0	78.29	50.7	67.0025	73.2625	65.825	62.8225	56.55	82.6775
2024	证监会行业	制造业-化学原料和化学制品制造业	13	0	1	6	5	1	0	0	0	0	0	75.43	50.49	64.7523	67.7138	61.5546	63.6362	52.3454	83.3615
2024	证监会行业	制造业-化学纤维制造业	1	0	0	1	0	0	0	0	0	0	0	67.73	67.73	67.73	75.24	66	60.33	56.31	84.85
2024	证监会行业	制造业-医药制造业	18	0	2	9	7	0	0	0	0	0	0	79.06	55.06	67.4033	74.7828	65.9544	64.2411	54.0761	87.3928
2024	证监会行业	制造业-家具制造业	1	0	0	1	0	0	0	0	0	0	0	68.51	68.51	68.51	81.38	62.23	58.4	58.6	83.36
2024	证监会行业	制造业-文教、工美、体育和娱乐用品制造业	1	0	0	1	0	0	0	0	0	0	0	71.65	71.65	71.65	75.4	75.74	64.45	60.45	88.45
2024	证监会行业	制造业-有色金属冶炼和压延加工业	8	0	1	5	2	0	0	0	0	0	0	75.96	63.96	70.6675	75.355	69.35	66.2238	64.6075	79.7525
2024	证监会行业	制造业-橡胶和塑料制品业	2	0	0	1	1	0	0	0	0	0	0	69.77	60.46	65.115	69.57	61.515	62.565	54.365	81.235
2024	证监会行业	制造业-汽车制造业	11	0	1	5	3	1	0	1	0	0	0	76.3	44.54	64.47	68.4173	63.2318	63.2982	49.4036	87.0664
2024	证监会行业	制造业-电气机械和器材制造业	21	0	8	9	3	0	1	0	0	0	0	79.55	46.34	71.0205	80.0767	69.9319	65.2533	61.9395	84.6433
2024	证监会行业	制造业-皮革、毛皮、羽毛及其制品和制鞋业	1	0	0	0	1	0	0	0	0	0	0	60.99	60.99	60.99	63.38	61.6	57.84	46.3	83.02
2024	证监会行业	制造业-计算机、通信和其他电子设备制造业	39	0	6	22	8	2	0	1	0	0	0	81.14	44.82	67.4095	68.0464	68.1579	66.1651	53.0733	88.9126
2024	证监会行业	制造业-通用设备制造业	3	0	0	2	1	0	0	0	0	0	0	68.31	59.54	65.2867	69.8967	62.9267	64.03	48.7967	90.0167
2024	证监会行业	制造业-酒、饮料和精制茶制造业	10	0	0	6	4	0	0	0	0	0	0	70.96	59.49	65.435	72.805	61.969	63.25	51.706	86.027
2024	证监会行业	制造业-铁路、船舶、航空航天和其他运输设备制造业	9	0	1	4	3	1	0	0	0	0	0	75.14	54.8	64.6811	67.2156	62.5344	64.88	48.1867	89.4256
2024	证监会行业	制造业-非金属矿物制品业	6	0	0	5	1	0	0	0	0	0	0	74.3	63.35	70.6533	76.89	66.945	66.1417	63.1683	81.8767
2024	证监会行业	制造业-食品制造业	2	0	0	2	0	0	0	0	0	0	0	73.31	69.85	71.58	83.27	70.7	63.895	63.055	84.365
2024	证监会行业	制造业-黑色金属冶炼和压延加工业	3	0	1	2	0	0	0	0	0	0	0	75.72	71.69	73.21	77.3767	70.69	70.22	68.1467	80.8067
2024	证监会行业	卫生和社会工作-卫生	1	0	0	1	0	0	0	0	0	0	0	66.04	66.04	66.04	74.55	66.55	60.56	63.46	69.91
2024	证监会行业	建筑业-土木工程建筑业	9	0	0	2	6	0	1	0	0	0	0	66.26	49.45	60.8333	63.1056	56.9578	63.1233	46.9244	81.6911
2024	证监会行业	房地产业-房地产业	4	0	0	3	1	0	0	0	0	0	0	71.62	64.81	66.9575	69.895	69.965	62.48	55.9175	83.5175
2024	证监会行业	批发和零售业-零售业	2	0	0	2	0	0	0	0	0	0	0	69.42	65.79	67.605	76.24	65.435	65.82	59.37	79.96
2024	证监会行业	电力、热力、燃气及水生产和供应业-燃气生产和供应业	1	0	1	0	0	0	0	0	0	0	0	78.32	78.32	78.32	81.82	72.99	77	74.57	83.96
2024	证监会行业	电力、热力、燃气及水生产和供应业-电力、热力生产和供应业	12	0	0	9	2	1	0	0	0	0	0	74.74	50.7	66.5225	67.8725	65.0067	65.685	54.4275	84.6575
2024	证监会行业	科学研究和技术服务业-研究和试验发展	3	0	1	2	0	0	0	0	0	0	0	83.84	73.18	76.9833	83.1	76.9433	73.4733	67.3433	91.4367
2024	证监会行业	租赁和商务服务业-商务服务业	3	0	0	1	2	0	0	0	0	0	0	72.39	55.68	61.7333	59.1033	61.2467	63.74	43.2267	89.4967
2024	证监会行业	采矿业-开采辅助活动	1	0	0	1	0	0	0	0	0	0	0	67.69	67.69	67.69	70.35	69.11	64.21	53.69	88.68
2024	证监会行业	采矿业-有色金属矿采选业	4	0	1	1	2	0	0	0	0	0	0	77.31	61.68	69.1775	71.7175	68.0475	67.645	62.6925	78.905
2024	证监会行业	采矿业-煤炭开采和洗选业	6	0	0	3	0	2	0	1	0	0	0	73.85	42.18	60.3383	61.3667	55.3183	62.99	51.7033	73.29
2024	证监会行业	采矿业-石油和天然气开采业	3	0	1	2	0	0	0	0	0	0	0	75.29	68.57	71.8967	70.7033	69.6867	75.0167	70.9	73.3867
2024	证监会行业	金融业-保险业	5	0	0	4	1	0	0	0	0	0	0	72.31	62.01	68.088	76.02	65.628	68.18	59.06	81.628
2024	证监会行业	金融业-其他金融业	1	0	0	0	0	0	1	0	0	0	0	45.13	45.13	45.13	50.59	39.66	50.32	20.46	82.14
2024	证监会行业	金融业-货币金融服务	22	0	0	14	7	1	0	0	0	0	0	74.85	53.42	66.1182	74.3395	61.9032	68.3132	56.1859	81.02
2024	证监会行业	金融业-资本市场服务	22	0	1	13	7	0	1	0	0	0	0	75.25	47.91	65.3341	67.4473	62.715	67.8373	51.5314	86.0423
2024	融绿一级行业	交通运输、仓储和邮政业	14	0	3	5	3	1	2	0	0	0	0	78.4	46.72	64.4393	68.3607	60.5693	65.0871	48.5671	88.2521
2024	融绿一级行业	信息传输、软件和信息技术服务业	20	0	0	10	5	3	1	1	0	0	0	72.98	44.64	62.392	66.9775	61.2385	61.911	45.7005	87.428
2024	融绿一级行业	其他服务业	4	0	0	2	2	0	0	0	0	0	0	72.39	55.68	63.655	66.0175	62.505	63.99	48.2575	86.755
2024	融绿一级行业	农、林、牧、渔业	3	0	0	3	0	0	0	0	0	0	0	70.78	68.75	69.98	76.67	64.3367	66.3633	61.31	82.9833
2024	融绿一级行业	医药制造业	19	0	3	9	7	0	0	0	0	0	0	79.06	55.06	67.5211	73.9811	66.2447	64.7189	54.8863	86.4716
2024	融绿一级行业	卫生服务业	5	0	1	4	0	0	0	0	0	0	0	83.84	66.04	73.714	81.132	73.138	70.016	64.744	87.166
2024	融绿一级行业	原材料加工制造业	34	0	2	22	9	1	0	0	0	0	0	75.96	50.49	68.0471	72.0488	65.2185	65.4647	59.3756	81.0512
2024	融绿一级行业	建筑业	9	0	0	2	6	0	1	0	0	0	0	66.26	49.45	60.8333	63.1056	56.9578	63.1233	46.9244	81.6911
2024	融绿一级行业	房地产业	4	0	0	3	1	0	0	0	0	0	0	71.62	64.81	66.9575	69.895	69.965	62.48	55.9175	83.5175
2024	融绿一级行业	木材、纺织、服饰和文教用品制造业	3	0	0	2	1	0	0	0	0	0	0	71.65	60.99	67.05	73.3867	66.5233	60.23	55.1167	84.9433
2024	融绿一级行业	汽车制造业	6	0	0	4	2	0	0	0	0	0	0	74.86	63.01	68.4067	73.9583	67.205	65.4433	57.1417	85.305
2024	融绿一级行业	电力、热力、燃气及水的生产和供应业	13	0	1	9	2	1	0	0	0	0	0	78.32	50.7	67.43	68.9454	65.6208	66.5554	55.9769	84.6038
2024	融绿一级行业	电气机械和器材、计算机、通信和其他电子设备制造业	66	0	15	32	14	2	1	2	0	0	0	81.14	44.54	67.9245	70.8974	67.9579	65.6029	54.8282	87.5682
2024	融绿一级行业	运输设备和通用专用设备制造业	24	0	2	12	9	1	0	0	0	0	0	76.17	54.8	66.0429	67.9042	64.5633	66.0846	49.9567	90.17
2024	融绿一级行业	采矿业	12	0	2	5	2	2	0	1	0	0	0	77.31	42.18	65.1433	66.9333	62.2858	65.5408	56.845	77.5892
2024	融绿一级行业	金融业	49	0	1	31	15	1	1	0	0	0	0	75.25	47.91	65.9671	71.4165	62.6478	68.0859	54.3894	83.3369
2024	融绿一级行业	食品饮料制造业	15	0	1	9	4	1	0	0	0	0	0	78.29	50.7	66.4513	74.282	64.0107	62.9947	53.9727	85.1667
2024	融绿二级行业	专用设备制造业	12	0	1	6	5	0	0	0	0	0	0	76.17	61.46	67.2533	67.9225	66.4942	67.5017	51.5742	90.7667
2024	融绿二级行业	中药制造业	6	0	0	5	1	0	0	0	0	0	0	74.51	58.54	67.8833	78.13	67.105	62.3233	58.4083	82.0917
2024	融绿二级行业	互联网和相关服务	3	0	0	1	1	0	0	1	0	0	0	71.6	44.64	60.2633	66.56	59.7567	58.0967	41.3933	88.57
2024	融绿二级行业	其他矿物采选业和开采辅助活动	5	0	1	2	2	0	0	0	0	0	0	77.31	61.68	68.88	71.444	68.26	66.958	60.892	80.86
2024	融绿二级行业	其他运输业和邮政业	2	0	1	0	0	0	1	0	0	0	0	76.87	47.99	62.43	66.935	61.32	59.77	50.67	80.08
2024	融绿二级行业	化学、橡胶、塑料和非金属矿物制品业	18	0	0	10	7	1	0	0	0	0	0	74.3	50.49	65.8017	69.07	62.6783	64.2733	54.6194	82.5728
2024	融绿二级行业	化学、生物药品制造业和其他医药制造业	13	0	3	4	6	0	0	0	0	0	0	79.06	55.06	67.3538	72.0662	65.8477	65.8246	53.2608	88.4931
2024	融绿二级行业	卫生服务业	5	0	1	4	0	0	0	0	0	0	0	83.84	66.04	73.714	81.132	73.138	70.016	64.744	87.166
2024	融绿二级行业	商务服务、批发、零售和其他服务业	4	0	0	2	2	0	0	0	0	0	0	72.39	55.68	63.655	66.0175	62.505	63.99	48.2575	86.755
2024	融绿二级行业	土木工程建筑业	9	0	0	2	6	0	1	0	0	0	0	66.26	49.45	60.8333	63.1056	56.9578	63.1233	46.9244	81.6911
2024	融绿二级行业	房地产业	4	0	0	3	1	0	0	0	0	0	0	71.62	64.81	66.9575	69.895	69.965	62.48	55.9175	83.5175
2024	融绿二级行业	文教、工美、体育和娱乐用品制造业	1	0	0	1	0	0	0	0	0	0	0	71.65	71.65	71.65	75.4	75.74	64.45	60.45	88.45
2024	融绿二级行业	木材制品制造业	1	0	0	1	0	0	0	0	0	0	0	68.51	68.51	68.51	81.38	62.23	58.4	58.6	83.36
2024	融绿二级行业	水上运输业	4	0	2	1	1	0	0	0	0	0	0	78.4	58.36	70.9725	75.465	68.385	69.835	57.5	91.1875
2024	融绿二级行业	汽车制造业	6	0	0	4	2	0	0	0	0	0	0	74.86	63.01	68.4067	73.9583	67.205	65.4433	57.1417	85.305
2024	融绿二级行业	煤炭开采和洗选业	6	0	0	3	0	2	0	1	0	0	0	73.85	42.18	60.3383	61.3667	55.3183	62.99	51.7033	73.29
2024	融绿二级行业	电信、广播电视和卫星传输服务	3	0	0	3	0	0	0	0	0	0	0	72.98	65.33	68.5933	80.53	64.98	68.1867	60.01	81.47
2024	融绿二级行业	电力、热力、燃气的生产和供应业	13	0	1	9	2	1	0	0	0	0	0	78.32	50.7	67.43	68.9454	65.6208	66.5554	55.9769	84.6038
2024	融绿二级行业	电气机械和器材制造业	26	0	9	10	4	1	1	1	0	0	0	79.55	44.54	68.9735	76.125	67.7923	64.7677	57.9504	85.5077
2024	融绿二级行业	畜牧业	3	0	0	3	0	0	0	0	0	0	0	70.78	68.75	69.98	76.67	64.3367	66.3633	61.31	82.9833
2024	融绿二级行业	石油加工、炼焦和核燃料加工业	5	0	0	5	0	0	0	0	0	0	0	71.83	67.07	68.84	74.286	64.47	65.686	62.864	77.798
2024	融绿二级行业	石油和天然气开采业	1	0	1	0	0	0	0	0	0	0	0	75.29	75.29	75.29	77.78	74.22	73.76	67.46	87.03
2024	融绿二级行业	羽毛皮革制品业	1	0	0	0	1	0	0	0	0	0	0	60.99	60.99	60.99	63.38	61.6	57.84	46.3	83.02
2024	融绿二级行业	航空运输业	5	0	0	3	1	0	1	0	0	0	0	72.15	46.72	63.364	65.654	59.084	65.802	46.95	87.992
2024	融绿二级行业	计算机、通信和其他电子设备制造业	40	0	6	22	10	1	0	1	0	0	0	81.14	44.82	67.2428	67.4995	68.0655	66.1458	52.7988	88.9075
2024	融绿二级行业	软件和信息技术服务业	14	0	0	6	4	3	1	0	0	0	0	72.93	45.13	61.5193	64.1629	60.7543	61.3836	43.5571	88.46
2024	融绿二级行业	运输设备制造业	9	0	1	4	3	1	0	0	0	0	0	75.14	54.8	64.6811	67.2156	62.5344	64.88	48.1867	89.4256
2024	融绿二级行业	通用设备制造业	3	0	0	2	1	0	0	0	0	0	0	68.31	59.54	65.2867	69.8967	62.9267	64.03	48.7967	90.0167
2024	融绿二级行业	道路运输业	3	0	0	1	1	1	0	0	0	0	0	65.57	51.19	58.86	64.35	52.1233	61.11	37.95	90.22
2024	融绿二级行业	金属冶炼和压延加工业	11	0	2	7	2	0	0	0	0	0	0	75.96	63.96	71.3609	75.9064	69.7155	67.3136	65.5727	80.04
2024	融绿二级行业	银行业	22	0	0	14	7	1	0	0	0	0	0	74.85	53.42	66.1182	74.3395	61.9032	68.3132	56.1859	81.02
2024	融绿二级行业	非银金融业	27	0	1	17	8	0	1	0	0	0	0	75.25	47.91	65.8441	69.0348	63.2544	67.9007	52.9256	85.2248
2024	融绿二级行业	食品饮料制造业	15	0	1	9	4	1	0	0	0	0	0	78.29	50.7	66.4513	74.282	64.0107	62.9947	53.9727	85.1667
