# Supplementary material
Source: Research Square preprint supplement (doi:10.21203/rs.3.rs-9809611/v1)
Supplement: Supplementary file 4 [file 914c71519866eb91cd7209c5.xlsx]

## Sheet: 模板
ListedCoID	Symbol	ShortName	EndDate	FullName	IndustryName	IndustryCode	RegisterAddress	OfficeAddress	EstablishDate	IPODate	PROVINCE	CITY	Zipcode	Secretary	SecretaryTel	SecretaryFax	SecretaryEmail	SecurityConsultant	SocialCreditCode	Sigchange	OfficeAddressLng	OfficeAddressLat	RegisterAddressLng	RegisterAddressLat	LegalRepresentative	MAINBUSSINESS	RegisterCapital	BusinessScope	EMAIL	Crcd	Website	ISIN
上市公司ID	股票代码	股票简称	年度区间	公司全称	行业名称	行业代码	注册具体地址	公司办公地址	公司成立日期	首次上市日期	所属省份	所属城市	办公地址邮政编码	董事会秘书	董秘联系电话	董秘传真	董秘电子邮箱	证券事务代表	统一社会信用代码	重大变更	办公地经度	办公地纬度	注册地经度	注册地纬度	法人代表	主营业务	注册资本	经营范围	电子邮箱	ABH股交叉码	公司网址	ISIN编码
101704	000001	平安银行	2015-12-31	平安银行股份有限公司	货币金融服务	J66	广东省深圳市罗湖区深南东路5047号	广东省深圳市罗湖区深南东路5047号	1987-12-22	1991-04-03	广东省	深圳市	518001	周强	0755-82080387	0755-82080386	pabdsh@pingan.com.cn	吕旭光		报告期内公司无收购及出售资产、吸收合并事项	114.10773682	22.54068139	114.10763282	22.54046739	谢永林	办理人民币存、贷、结算、汇兑业务；人民币票据承兑和贴现；各项信托业务；经人民银行批准发行或买卖人民币有价证券；外汇存款、汇款；境内境外借款；在境内境外发行或代理发行外币有价证券外汇存款、汇款、境内境外汇借款等。	14308676139	经批准的商业银行业务	pabdsh@pingan.com.cn		www.bank.pingan.com	CNE000000040
101704	000001	平安银行	2016-12-31	平安银行股份有限公司	货币金融服务	J66	广东省深圳市罗湖区深南东路5047号	广东省深圳市深南东路5047号	1987-12-22	1991-04-03	广东省	深圳市	518001	周强	0755-82080387	0755-82080386	pabdsh@pingan.com.cn	吕旭光	91440300192185379H	报告期内公司无收购及出售资产、吸收合并事项	114.10773682	22.54068139	114.10763282	22.54046739	谢永林	办理人民币存、贷、结算、汇兑业务；人民币票据承兑和贴现；各项信托业务；经人民银行批准发行或买卖人民币有价证券；外汇存款、汇款；境内境外借款；在境内境外发行或代理发行外币有价证券外汇存款、汇款、境内境外汇借款等。	17170000000	经批准的商业银行业务。	pabdsh@pingan.com.cn		www.bank.pingan.com	CNE000000040
101704	000001	平安银行	2017-12-31	平安银行股份有限公司	货币金融服务	J66	广东省深圳市罗湖区深南东路5047号	广东省深圳市深南东路5047号	1987-12-22	1991-04-03	广东省	深圳市	518001	周强	0755-82080387	0551-63689787	zmq@helichina.com	胡彦军	91440300192185379H	报告期内公司无收购及出售资产、吸收合并事项	114.10773682	22.54068139	114.10763282	22.54046739	谢永林	办理人民币存、贷、结算、汇兑业务；人民币票据承兑和贴现；各项信托业务；经人民银行批准发行或买卖人民币有价证券；外汇存款、汇款；境内境外借款；在境内境外发行或代理发行外币有价证券外汇存款、汇款、境内境外汇借款等。	740180802	经批准的商业银行业务	pabdsh@pingan.com.cn		www.bank.pingan.com	CNE000000040
101704	000001	平安银行	2018-12-31	平安银行股份有限公司	货币金融服务	J66	广东省深圳市罗湖区深南东路5047号	广东省深圳市深南东路5047号	1987-12-22	1991-04-03	广东省	深圳市	518001	周强	0755-82080387	0755-82080386	pabdsh@pingan.com.cn	吕旭光	91440300192185379H	报告期内公司无收购及出售资产、吸收合并事项	114.10796582	22.54057839	114.10763282	22.54046739	谢永林	办理人民币存、贷、结算、汇兑业务；人民币票据承兑和贴现；各项信托业务；经人民银行批准发行或买卖人民币有价证券；外汇存款、汇款；境内境外借款；在境内境外发行或代理发行外币有价证券外汇存款、汇款、境内境外汇借款等。	17170000000	经批准的商业银行业务	pabdsh@pingan.com.cn		www.bank.pingan.com	CNE000000040
101775	000002	万科A	2015-12-31	万科企业股份有限公司	房地产业	K70	广东省深圳市盐田区大梅沙环梅路33号万科中心	广东省深圳市盐田区大梅沙环梅路33号万科中心	1984-05-30	1991-01-29	广东省	深圳市	518083	谭华杰	0755-25606666	0755-25531696	IR@vanke.com	梁洁		报告期内公司无收购及出售资产、吸收合并事项	114.3029745306	22.5968412369	114.3046415306	22.5978732369	王石	房地产、贸易及零售等。	11051612300	兴办实业(具体项目另行申报) ；国内商业；物资供销业(不含专营、专控、专卖商品) ；进出口业务(按深经发审证字第113号外贸企业审定证书规定办理) ；房地产开发。控股子公司主营业务包括房地产开发、物业管理、投资咨询等。	IR@vanke.com	02202	www.vanke.com	CNE0000000T2
101775	000002	万科A	2016-12-31	万科企业股份有限公司	房地产业	K70	广东省深圳市盐田区大梅沙环路33号万科中心	广东省深圳市盐田区大梅沙环路33号万科中心	1984-05-30	1991-01-29	广东省	深圳市	518083	朱旭	0755-25606666	0755-25531696	IR@vanke.com	梁洁	91440300192181490G	重大收购及出售资产事项:2015年12月18日,公司股票因筹划重大资产重组事项而停牌。2016年6月17日,公司召开第十七届董事会第十一次会议,审议通过了以发行股份的方式向地铁集团购买其持有的深圳地铁前海国际发展有限公司100%股权等有关事项。因各方股东未达成一致意见,2016年12月16日,公司董事会审议通过终止本次发行股份购买资产事项。具体情况可查阅公司于2016年6月18日、7月2日、12月19日披露的公告。2016年9月23日,本集团投资约人民币38.89亿元,通过与几个合作方组成的联合收购平台收购了印力集团的多数股权,并完成交割。具体情况可查阅公司于2016年7月12日、7月21日和8月22日披露的公告。	114.3035755306	22.5970112369	114.3046415306	22.5978732369	王石	房地产、贸易及零售等。	11039152001	兴办实业(具体项目另行申报);国内商业;物资供销业(不含专营、专控、专卖商品);进出口业务(按深经发审证字第113号外贸企业审定证书规定办理);房地产开发。控股子公司主营业务包括房地产开发、物业管理、投资咨询等。	IR@vanke.com	02202	www.vanke.com	CNE0000000T2
101775	000002	万科A	2017-12-31	万科企业股份有限公司	房地产业	K70	广东省深圳市盐田区大梅沙环梅路33号万科中心	广东省深圳市盐田区大梅沙环梅路33号万科中心	1984-05-30	1991-01-29	广东省	深圳市	518083	朱旭	0755-25606666	0755-25531696	IR@vanke.com	梁洁	91440300192181490G	报告期内公司无收购及出售资产、吸收合并事项	114.3029745306	22.5968412369	114.3046415306	22.5978732369	郁亮	房地产、贸易及零售等。	11039152001	兴办实业(具体项目另行申报);国内商业;物资供销业(不含专营、专控、专卖商品);进出口业务(按深经发审证字第113号外贸企业审定证书规定办理);房地产开发。控股子公司主营业务包括房地产开发、物业管理、投资咨询等。	IR@vanke.com	02202	www.vanke.com	CNE0000000T2
101775	000002	万科A	2018-12-31	万科企业股份有限公司	房地产业	K70	广东省深圳市盐田区大梅沙环梅路33号万科中心	广东省深圳市盐田区大梅沙环梅路33号万科中心	1984-05-30	1991-01-29	广东省	深圳市	518083	朱旭	0755-25606666	0755-25531696	IR@vanke.com	吉江华	91440300192181490G	报告期内公司无收购及出售资产、吸收合并事项	114.3029745306	22.5968412369	114.3046415306	22.5978732369	郁亮	房地产、贸易及零售等。	11039152001	兴办实业(具体项目另行申报);国内商业;物资供销业(不含专营、专控、专卖商品);进出口业务(按深经发审证字第113号外贸企业审定证书规定办理);房地产开发。	IR@vanke.com	02202	www.vanke.com	CNE0000000T2
102314	000008	神州高铁	2016-12-31	神州高铁技术股份有限公司	铁路、船舶、航空航天和其它运输设备制造业	C37	北京市海淀区高梁桥斜街59号院1号楼16层1606	北京市海淀区高梁桥斜街59号院1号楼中坤大厦16层	1989-10-11	1992-05-07	北京市	北京市	100044	王志刚	010-56500580	010-56500580	dongmi@shenzhou-gaotie.com	侯小婧	91110000192184333K	出售重大股权情况:交易对方:宝利来实业;王勇、楚立、宋金虎;被出售股权:宝利来投资100%股权;掌娱天下10%股权及其业绩补偿款;出售日:2016年8月10日;2016年12月9日;交易价格(万元):66,000;6,000;本期初起至出售日该股权为上市公司贡献的净利润(万元):1,402.89;-150;出售对公司的影响:聚焦公司主业,提高公司资产的流动性,优化公司资产结构,交易实现收益14,658.40万元;聚焦公司主业,加快回收投资,提高公司资金流动性,优化公司资产结构;推进解决掌娱天下业绩补偿款支付事项;股权出售为上市公司贡献的净利润占净利润总额的比例:2.64%;-0.28%;股权出售定价原则:参考交易标的评估价值定价;双方协商定价;是否为关联交易:是;否;与交易对方的关联关系:在协议签署日,宝利来实业持有公司6.52%股份,且同受公司原实际控制人文炳荣先生控制;不存在关联关系…	116.3489737031	39.9442985804	116.3498077031	39.9439765804	王志全	轨道交通运营维护业务。	2809078279	轨道交通、计息机网络的技术开发、技术咨询、技术转让、技术服务;销售开发后的产品;计算机系统服务;货物进出口;技术进出口;代理进出口;项目投资;物业管理。(企业依法自主选择经营项目,开展经营活动;依法须经批准的项目,经相关部门批准后依批准的内容开展经营活动;不得从事本市产业政策禁止和限制类项目的经营活动。)	sqdq@163.com		www.shenzhou-gaotie.com	CNE0000001C6
102336	000009	中国宝安	2015-12-31	中国宝安集团股份有限公司	综合	S90	广东省深圳市笋岗东路1002号宝安广场A座28-29层	广东省深圳市笋岗东路1002号宝安广场A座28-29层	1983-07-01	1991-06-25	广东省	深圳市	518020	郭山清	0755-25170336	0755-25170367	zgbajt@163.net	唐智乐		出售重大股权情况: 交易对方:东旭集团 被出售股权:宝安鸿基地产集团股份有限公司15%股权 出售日:2015年09月25日 交易价格（万元）:119,663 本期初起至出售日该股权为上市公司贡献的净利润（万元）:435.78 出售对公司的影响:产生78,993.78万元投资收益 股权出售为上市公司贡献的净利润占净利润总额的比例:81.78% 股权出售定价原则:协议定价 是否为关联交易:否 与交易对方的关联关系:非关联方 所涉及的股权是否已全部过户:是 是否按计划如期实施，如未按计划实施，应当说明原因及公司已采取的措施:已如期实施 披露日期:-- 披露索引:--	114.12178171	22.55674643	114.12204771	22.55707643	陈政立	房地产开发经营	1592107386	国内商业，物资供销业（不含专营、专控、专 卖商品）；投资兴办工业，引进三来一补；进出口贸易业务（按深贸管审证第094号文规定办理）； 房地产开发、仓储、运输、酒店等服务业，文化业；药品的生产销售；经营锰酸锂正极、改性石 墨材料、进出口等。	zgbajt@163.net		www.chinabaoan.com	CNE000000222
102336	000009	中国宝安	2016-12-31	中国宝安集团股份有限公司	综合	S90	广东省深圳市笋岗东路1002号宝安广场A座28-29层	广东省深圳市笋岗东路1002号宝安广场A座28-29层	1983-07-01	1991-06-25	广东省	深圳市	518020	郭山清	0755-25170336	0755-25170367	zgbajt@163.net	唐智乐	9144030019219665XD	报告期内公司无收购及出售资产、吸收合并事项	114.12178171	22.55674643	114.12204771	22.55707643	陈政立	房地产开发经营	2149344971	新材料、新能源材料、新能源等高新技术产业项目的投资及经营,现代生物医药项目的投资及经营,房地产开发经营。	zgbajt@163.net		www.chinabaoan.com	CNE000000222
101655	000027	深圳能源	2015-12-31	深圳能源集团股份有限公司	电力、热力生产和供应业	D44	广东省深圳市福田区深南中路2068号华能大厦5,33,35-36,38-41层	广东省深圳市福田区深南中路2068号华能大厦5,33,35-36,38-41层	1993-08-21	1993-09-03	广东省	深圳市	518031	邵崇	0755-83684138	0755-83684128	ir@sec.com.cn	周朝晖		报告期内公司无收购及出售资产、吸收合并事项	114.0899644392	22.5411595234	114.0897454392	22.5413455234	熊佩锦	各种常规能源和新能源的开发、生产、购销；投资和经营与能源相关的原材料的开发和运输、港口、码头和仓储工业等。	3964491597	各种常规能源和新能源的开发、生产、购 销；投资和经营与能源相关的原材料的开发和运输、港口、码头和仓储工业等。	ir@sec.com.cn		www.sec.com.cn	CNE000000933
10985	000039	中集集团	2015-12-31	中国国际海运集装箱(集团)股份有限公司	金属制品业	C33	广东省深圳市南山蛇口工业区港湾大道2号中集研发中心8楼	广东省南山区深圳市蛇口工业区港湾大道2号中集集团研发中心	1992-09-30	1994-03-23	广东省	深圳市	518067	于玉群	0755-26691130	0755-26826579	shareholder@cimc.com	王心九		报告期内公司无收购及出售资产、吸收合并事项	113.91186135	22.47709764	113.91178635	22.47731064	王宏	干货集装箱制造。	2977819686	现代化交通运输装备、能源、食品、化工等装备的制造 及服务业务,其中主要包括:制造修理各种集装箱及其有关业务,利用现有设备加工制造各类零部件结 构件和有关设备,并提供切割、冲压成型、铆接表面处理,包括喷沙喷漆、焊接和装配等加工服务;开 发、生产、销售各种高技术、高性能的专用汽车、半挂车系列;集装箱租赁;压力容器、压缩机等高端 燃气装备产品的研发、生产、销售及天然气输配系统的集成业务;静态储罐、罐式码头设备的生产;在 LNG、LPG及其他石油化工气体的存贮、处理领域,为客户提供 EP+CS(设计、采购和建造监工)等技术 工程服务。除此之外,本集团还从事物流服务、海洋工程、铁路货车制造、房地产开发等业务。	shareholder@cimc.com	02039	www.cimc.com	CNE000000644
101185	000046	泛海控股	2015-12-31	泛海控股股份有限公司	房地产业	K70	北京市东城区建国门内大街28号民生金融中心C座22层	北京市东城区建国门内大街28号民生金融中心C座22层	1989-01-04	1994-09-12	北京市	北京市	100005	陈怀东	010-85259683	010-85259797	chd@fhkg.com	陆洋		报告期内公司无收购及出售资产、吸收合并事项	116.4210165882	39.9076321004	116.4195935882	39.9071481004	卢志强	房地产及相关业务。	4557311768	金融业务；投资及投资管理；资产管理；经营房地产业务及物业管理；自有物业租赁；企业管理咨询；销售建筑材料、装饰材料、机械设备。	dsh@fhjs.cn		www.fhkg.com	CNE000000123
101551	000060	中金岭南	2015-12-31	深圳市中金岭南有色金属股份有限公司	有色金属冶炼及压延加工业	C32	广东省深圳市福田区车公庙深南大道6013号中国有色大厦24-26楼	广东省深圳市福田区车公庙深南大道6013号中国有色大厦24-26楼	1984-09-01	1997-01-23	广东省	深圳市	518040	彭玲	0755-82839363	0755-83474889	dsh@nonfemet.com.cn	黄建民		出售重大资产情况： 交易对方：深圳前海腾飞壹号基金合伙企业（有限合伙） 被出售资产：全资子公司深圳市金鹰出租汽车有限公司98%股权 出售日：2015年12月22日 交易价格（万元）：21,261.01 本期初起至出售日该资产为上市公司贡献的净利润（万元）：13,627.49 出售对公司的影响（注3）：为公司带来归属母公司净利润1.36亿元 资产出售为上市公司贡献的净利润占净利润总额的比例：67.82% 资产出售定价原则：评估价 是否为关联交易：是 与交易对方的关联关系（适用关联交易情形）：本公司控股股东广东省广晟资产经营有限公司之全资子公司管理的基金 所涉及的资产产权是否已全部过户：是 所涉及的债权债务是否已全部转移：是 是否按计划如期实施，如未按计划实施，应当说明原因及公司已采取的措施：是 披露日期：2015年12月24日 披露索引：巨潮资讯网（www.cninfo.com.cn）公告…	114.0268267797	22.5355241501	114.0267697797	22.5355091501	朱伟	铅锌精矿开采及冶炼，有色金属贸易等。	2212627938	兴办实业（具体项目另行申报）；国内贸易（不含专营、专控、专卖商品）；经济信息咨询（不含限制项目）；经营进出口业务；在韶关市设立分公司从事采选、冶炼、制造、加工：有色金属矿产品、冶炼产品、深加工产品、综合利用产品(含硫酸、氧气、硫磺、镓、锗、电炉锌粉的生产) 及包装物、容器（含钢提桶、塑料编织袋）( 以上经营范围仅限于分支机构生产，其营业执照另行申报)；建筑材料、机械设备及管道安装、维修；工程建设、地测勘探、科研设计；从事境外期货业务。	zjln@nonfemet.com.cn		www.nonfemet.com	CNE000000FS7
101551	000060	中金岭南	2016-12-31	深圳市中金岭南有色金属股份有限公司	有色金属冶炼及压延加工业	C32	广东省深圳市福田区深南大道6013号中国有色大厦24-26楼	广东省深圳市福田区深南大道6013号中国有色大厦24-26楼	1984-09-01	1997-01-23	广东省	深圳市	518040	黄建民	0755-82839363	0755-83474889	dsh@nonfemet.com.cn	刘渝华	914403001922063360	报告期内公司无收购及出售资产、吸收合并事项	114.0268267797	22.5355241501	114.0267697797	22.5355091501	马建华	铅锌精矿开采及冶炼，有色金属贸易等。	2212627938	兴办实业(具体项目另行申报);国内贸易(不含专营、专控、专卖商品);经济信息咨询(不含限制项目);经营进出口业务;在韶关市设立分公司从事采选、冶炼、制造、加工:有色金属矿产品、冶炼产品、深加工产品、综合利用产品(含硫酸、氧气、硫磺、镓、锗、电炉锌粉的生产)及包装物、容器(含钢提桶、塑料编织袋)(以上经营范围仅限于分支机构生产,其营业执照另行申报);建筑材料、机械设备及管道安装、维修;工程建设、地测勘探、科研设计;从事境外期货业务。	zjln@nonfemet.com.cn		www.nonfemet.com	CNE000000FS7
101551	000060	中金岭南	2017-12-31	深圳市中金岭南有色金属股份有限公司	有色金属冶炼及压延加工业	C32	广东省深圳市福田区深南大道6013号中国有色大厦24-26楼	广东省深圳市福田区深南大道6013号中国有色大厦24-26楼	1984-09-01	1997-01-23	广东省	深圳市	518040	黄建民	0755-82839363	0755-83474889	dsh@nonfemet.com.cn	刘渝华	914403001922063360	出售重大资产情况:交易对方:国澳锂业有限公司;被出售资产:加拿大摩布朗锂矿项目60%权益;出售日:2017年12月19日;交易价格(万元):6000万美元;本期初起至出售日该资产为上市公司贡献的净利润(万元):89,902,891.48;出售对公司的影响:-;资产出售为上市公司贡献的净利润占净利润总额的比例:8.22%;资产出售定价原则:市场价;是否为关联交易:否;与交易对方的关联关系(适用关联交易情形):否;所涉及的资产产权是否已全部过户:是;所涉及的债权债务是否已全部转移:已完成;是否按计划如期实施,如未按计划实施,应当说明原因及公司已采取的措施:是;披露日期:2017/12/20;披露索引:编号:2017-94	114.0268267797	22.5355241501	114.0267697797	22.5355091501	余刚	铅锌精矿开采及冶炼，有色金属贸易等。	2379790218	兴办实业(具体项目另行申报);国内贸易(不含专营、专控、专卖商品);经济信息咨询(不含限制项目);经营进出口业务;在韶关市设立分公司从事采选、冶炼、制造、加工:有色金属矿产品、冶炼产品、深加工产品、综合利用产品(含硫酸、氧气、硫磺、镓、锗、电炉锌粉的生产)及包装物、容器(含钢提桶、塑料编织袋)(以上经营范围仅限于分支机构生产,其营业执照另行申报);建筑材料、机械设备及管道安装、维修;工程建设、地测勘探、科研设计;从事境外期货业务。	zjln@nonfemet.com.cn		www.nonfemet.com	CNE000000FS7
10864	000061	农产品	2015-12-31	深圳市农产品股份有限公司	商务服务业	L72	广东省深圳市布吉路1021号天乐大厦22楼	广东省深圳市福田区深南大道7028号时代科技大厦13楼	1989-01-14	1997-01-10	广东省	深圳市	518040	刘雄佳	0755-82589021	0755-82589021	IR@szap.com	裴欣		出售重大股权情况: 关于公开挂牌转让交易大厦公司股权的事项: 2015年5月20日，公司2014 年度股东大会审议通过了《关于公开挂牌转让交易大厦公司 100%股权 的议案》，同意公司联合控股子公司深圳市福田农产品批发市场有限公司、深圳市农产品运输服务有限公 司通过“100%股权转让＋代偿债务”整体转让方式，以不低于评估价作为挂牌底价委托深圳联合产权交易 所公开挂牌转让旗下深圳市农产品交易大厦有限公司（以下简称“交易大厦公司”）100%股权，并授权管 理层履行挂牌等相关程序，签署股权转让相关法律文件。（具体详见公司于 2015 年 4 月 30 日、5 月 22 日在《证券时报》、《中国证券报》、《上海证券报》和《证券日报》上刊登的公司公告） 公司严格按照国有产权变动规定，委托深圳德正信国际资产评估有限公司（具有证券从业资质）对交 易大厦公司 100%股权进行了资产评估，评估结果为：交易…	114.023920122	22.5366848317	114.11784413	22.58124358	蔡颖	农产品的经营和管理。	1696964131	农产品批发市场的开发、建设、经营和管理，业务范围 涉及农产品流通、农产品供应链管理、大宗农产品电子交易、农产品电子商务和“新农业基地建设”等。	IR@szap.com		www.szap.com	CNE0000008V1
101553	000063	中兴通讯	2015-12-31	中兴通讯股份有限公司	计算机、通信和其他电子设备制造业	C39	广东省深圳市南山区高新技术产业园科技南路中兴通讯大厦	广东省深圳市南山区高新技术产业园科技南路中兴通讯大厦	1997-11-11	1997-11-18	广东省	深圳市	518057	曹巍	0755-26770282	0755-26770286	IR@zte.com.cn	徐宇龙	9144030027939873X7	报告期内公司无收购及出售资产、吸收合并事项	113.949066546	22.5377322498	113.948891546	22.5378492498	殷一民	信息产业、通讯及电子设备、计算机系统的硬件、软件等。	4150791215	生产程控交换系统、多媒体通 讯系统、通讯传输系统；研制、生产移动通信系统设备、卫星通讯、微波通讯设备、寻 呼机、计算机软硬件、闭路电视、微波通信、信号自动控制、计算机信息处理、过程监 控系统、防灾报警系统、新能源发电及应用系统等项目的技术设计、开发、咨询、服务； 铁路、地下铁路、城市轨道交通、公路、厂矿、港口码头、机场的有线无线通信等项目 的技术设计、开发、咨询、服务(不含限制项目)；电子设备、微电子器件的购销(不含专 营、专控、专卖商品)；承包境外通讯及相关工程和境内国际招标工程，上述境外工程所 需的设备、材料进出口、对外派遣实施上述境外工程的劳务人员；电子系统设备的技术 开发和购销(不含限制项目及专营、专控、专卖商品)；经营进出口业务(按贸发局核发的 资格证书规定执行)；电信工程专业承包。	fengjianxiong@zte.com.cn	00763	www.zte.com.cn	CNE000000TK5
101553	000063	中兴通讯	2016-12-31	中兴通讯股份有限公司	计算机、通信和其他电子设备制造业	C39	广东省深圳市南山区高新技术产业园科技南路中兴通讯大厦	广东省深圳市南山区高新技术产业园科技南路中兴通讯大厦	1997-11-11	1997-11-18	广东省	深圳市	518057	曹巍	0755-26770282	0755-26770286	IR@zte.com.cn	徐宇龙	9144030027939873X7	报告期内公司无收购及出售资产、吸收合并事项	113.949066546	22.5377322498	113.948891546	22.5378492498	殷一民	信息产业、通讯及电子设备、计算机系统的硬件、软件等。	4184628000	生产程控交换系统、多媒体通讯系统、通讯传输系统;研制、生产移动通信系统设备、卫星通讯、微波通讯设备、寻呼机、计算机软硬件、闭路电视、微波通信、信号自动控制、计算机信息处理、过程监控系统、防灾报警系统、新能源发电及应用系统等项目的技术设计、开发、咨询、服务;铁路、地下铁路、城市轨道交通、公路、厂矿、港口码头、机场的有线无线通信等项目的技术设计、开发、咨询、服务(不含限制项目);电子设备、微电子器件的购销(不含专营、专控、专卖商品);承包境外通讯及相关工程和境内国际招标工程,上述境外工程所需的设备、材料进出口、对外派遣实施上述境外工程的劳务人员;电子系统设备的技术开发和购销(不含限制项目及专营、专控、专卖商品);经营进出口业务(按贸发局核发的资格证书规定执行);电信工程专业承包。	fengjianxiong@zte.com.cn	00763	www.zte.com.cn	CNE000000TK5
101553	000063	中兴通讯	2017-12-31	中兴通讯股份有限公司	计算机、通信和其他电子设备制造业	C39	广东省深圳市南山区高新技术产业园科技南路中兴通讯大厦	广东省深圳市南山区高新技术产业园科技南路中兴通讯大厦	1997-11-11	1997-11-18	广东省	深圳市	518057	曹巍	0755-26770282	0755-26770286	IR@zte.com.cn	徐宇龙	9144030027939873X7	本集团重大资产和股权出售情况:资产交易事项1、本公司子公司收购土耳其上市公司Netaş公司股权本公司全资附属公司中兴通讯荷兰控股有限公司(ZTE Cooperatief U.A.,以下简称“荷兰控股”)以101,280,539美元的交易价格向OEPTurkey Tech.B.V.收购土耳其上市公司NETAŞ TELEKOMÜNİKASYON A.Ş.(以下简称“Netaş”)48.04%股权,双方已完成相关股权交割事宜。荷兰控股已根据土耳其本地法律法规完成强制要约收购,目前,荷兰控股持有Netaş23,351,328股A股、7,817,023.34股B股,合计占Netaş已发行股份总额的48.05%。上述事项的具体情况请见本公司分别于2016年12月6日、2017年5月8日、2017年7月29日及2017年10月19日发布的相关公告。2、深圳湾超级总部基地相关事宜基于经营发展需要,本公司…	113.949066546	22.5377322498	113.948891546	22.5378492498	殷一民	信息产业、通讯及电子设备、计算机系统的硬件、软件等。	4192672000	生产程控交换系统、多媒体通讯系统、通讯传输系统;研制、生产移动通信系统设备、卫星通讯、微波通讯设备、寻呼机、计算机软硬件、闭路电视、微波通信、信号自动控制、计算机信息处理、过程监控系统、防灾报警系统、新能源发电及应用系统等项目的技术设计、开发、咨询、服务;铁路、地下铁路、城市轨道交通、公路、厂矿、港口码头、机场的有线无线通信等项目的技术设计、开发、咨询、服务(不含限制项目);电子设备、微电子器件的购销(不含专营、专控、专卖商品);承包境外通讯及相关工程和境内国际招标工程,上述境外工程所需的设备、材料进出口、对外派遣实施上述境外工程的劳务人员;电子系统设备的技术开发和购销(不含限制项目及专营、专控、专卖商品);经营进出口业务(按贸发局核发的资格证书规定执行);电信工程专业承包(待取得资质证书后方可经营);自有房屋租赁。	fengjianxiong@zte.com.cn	00763	www.zte.com.cn	CNE000000TK5
101553	000063	中兴通讯	2018-12-31	中兴通讯股份有限公司	计算机、通信和其他电子设备制造业	C39	广东省深圳市南山区高新技术产业园科技南路中兴通讯大厦	广东省深圳市南山区高新技术产业园科技南路中兴通讯大厦	1997-11-11	1997-11-18	广东省	深圳市	518057	曹巍	0755-26770282	0755-26770286	IR@zte.com.cn	徐宇龙	9144030027939873X7	本集团重大资产和股权出售情况:资产交易事项:1、深圳湾超级总部基地相关事宜基于经营发展需要,本公司于2017年6月27日竞得深圳市南山区深圳湾超级总部基地编号T208-0049土地使用权。经过竞争性谈判,本公司选定深圳市万科房地产有限公司(以下简称“万科”)为本公司提供T208-0049宗地的开发建设、销售、运营等服务,并分别于2017年12月25日及2018年1月25日与万科签署《意向书》及《关于<意向书>之补充协议》。具体情况请见本公司分别于2017年12月26日、2018年1月26日发布的《关于与深圳市万科房地产有限公司签署<意向书>的公告》、《关于与深圳市万科房地产有限公司签署<意向书>的进展公告》。2018年2月9日,本公司与万科签订《委托开发建设、销售、运营框架协议》等交易文件,据此,万科向本公司提供以下服务:(1)开发建设T208-0049宗地的189,890平方米物业;(…	113.949066546	22.5377322498	113.948891546	22.5378492498	李自学	信息产业、通讯及电子设备、计算机系统的硬件、软件等。	4192672000	生产程控交换系统、多媒体通讯系统、通讯传输系统;研制、生产移动通信系统设备、卫星通讯、微波通讯设备、寻呼机、计算机软硬件、闭路电视、微波通信、信号自动控制、计算机信息处理、过程监控系统、防灾报警系统、新能源发电及应用系统等项目的技术设计、开发、咨询、服务;铁路、地下铁路、城市轨道交通、公路、厂矿、港口码头、机场的有线无线通信等项目的技术设计、开发、咨询、服务(不含限制项目);电子设备、微电子器件的购销(不含专营、专控、专卖商品);承包境外通讯及相关工程和境内国际招标工程,上述境外工程所需的设备、材料进出口、对外派遣实施上述境外工程的劳务人员;电子系统设备的技术开发和购销(不含限制项目及专营、专控、专卖商品);经营进出口业务(按贸发局核发的资格证书规定执行);电信工程专业承包(待取得资质证书后方可经营);自有房屋租赁。	fengjianxiong@zte.com.cn	00763	www.zte.com.cn	CNE000000TK5
101663	000069	华侨城A	2015-12-31	深圳华侨城股份有限公司	公共设施管理业	N78	广东省深圳市南山区华侨城集团办公大楼	广东省深圳市南山区华侨城集团办公大楼	1997-09-02	1997-09-10	广东省	深圳市	518053	曾辉	0755-26909069	0755-26600936	000069IR@chinaoct.com	陈钢		报告期内公司无收购及出售资产、吸收合并事项	113.9787768502	22.5344183335	114.1038727081	22.6569754498	段先念	旅游业及与旅游配套的供水、供电、水电安装维修。	8205681415	旅游及其关联产业的投资和管理；房地产开发；自有物业租赁； 酒店管理；文化活动的组织策划；会展策划；旅游项目策划；旅游信息咨询；旅游工艺品的 销售；投资兴办实业（具体项目另行申报）；国内商业（不含专营、专控、专卖商品）；经营 进出口业务（法律、行政法规、国务院决定禁止的项目除外，限制的项目须取得许可后方可 经营）。	000069IR@chinaoct.com		www.octholding.com	CNE000000SS0
101663	000069	华侨城A	2016-12-31	深圳华侨城股份有限公司	公共设施管理业	N78	广东省深圳市南山区华侨城指挥部大楼103、105、107、111、112室	广东省深圳市南山区华侨城办公大楼	1997-09-02	1997-09-10	广东省	深圳市	518053	关山	0755-26909069	0755-26600936	000069IR@chinaoct.com	陈钢	91440300279374105B	报告期内公司无收购及出售资产、吸收合并事项	113.9815640202	22.537019261	113.9842488502	22.5342203335	段先念	旅游业及与旅游配套的供水、供电、水电安装维修。	8205681415	旅游及其关联产业的投资和管理;房地产开发;自有物业租赁;酒店管理;文化活动的组织策划;会展策划;旅游项目策划;旅游信息咨询;旅游工艺品的销售;投资兴办实业(具体项目另行申报);国内商业(不含专营、专控、专卖商品);经营进出口业务(法律、行政法规、国务院决定禁止的项目除外,限制的项目须取得许可后方可经营)。	000069IR@chinaoct.com		www.octholding.com	CNE000000SS0
101663	000069	华侨城A	2017-12-31	深圳华侨城股份有限公司	公共设施管理业	N78	广东省深圳市南山区华侨城指挥部大楼103、105、107、111、112室	广东省深圳市南山区华侨城办公大楼	1997-09-02	1997-09-10	广东省	深圳市	518053	关山	0755-26909069	0755-26600936	000069IR@chinaoct.com	陈兰	91440300279374105B	出售重大股权情况:交易对方:华侨城集团有限公司;北京泰禾锦辉置业有限公司;华侨城华东投资有限公司;new china oct fund spc;被出售股权:深圳华侨城文化旅游科技股份有限公司;北京侨禧投资有限公司;泰州华侨城有限公司;资汇控股有限公司;出售日:2017年08月29日;2017年09月20日;2017年11月30日;2017年12月29日;交易价格(万元):101,693.16;73,416;5,196.49;72,805.77;本期初起至出售日该股权为上市公司贡献的净利润(万元):3,370;-1,396;-11,793;-1,288.36;出售对公司的影响:实现投资收益8.42亿元;实现投资收益22.92亿元;实现投资收益2.11亿元;实现投资收益11.29亿元;股权出售为上市公司贡献的净利润占净利润总额的比例:8.04%;12.11%;0.10%;10.62%;股权出…	113.9815640202	22.537019261	113.9842488502	22.5342203335	段先念	旅游业及与旅游配套的供水、供电、水电安装维修。	8204081415	旅游及其关联产业的投资和管理;房地产开发;自有物业租赁;酒店管理;文化活动的组织策划;会展策划;旅游项目策划;旅游信息咨询;旅游工艺品的销售;投资兴办实业(具体项目另行申报);国内商业(不含专营、专控、专卖商品);经营进出口业务(法律、行政法规、国务院决定禁止的项目除外,限制的项目须取得许可后方可经营)。	000069IR@chinaoct.com		www.octholding.com	CNE000000SS0
101663	000069	华侨城A	2018-12-31	深圳华侨城股份有限公司	房地产业	K70	广东省深圳市南山区华侨城指挥部大楼103、105、107、111、112室	广东省深圳市南山区华侨城办公大楼	1997-09-02	1997-09-10	广东省	深圳市	518053	关山	0755-26909069	0755-26600936	000069IR@chinaoct.com	陈兰	91440300279374105B	出售重大股权情况:交易对方:上海源堃祥实业有限公司;被出售股权:上海万锦置业发展有限公司;出售日:2018年12月29日;交易价格(万元):130,000;本期初起至出售日该股权为上市公司贡献的净利润(万元):-1,496.98;出售对公司的影响:实现投资收益10.03亿;股权出售为上市公司贡献的净利润占净利润总额的比例:6.66%;股权出售定价原则:按评估价确定;是否为关联交易:否;与交易对方的关联关系:否;所涉及的股权是否已全部过户:是;是否按计划如期实施,如未按计划实施,应当说明原因及公司已采取的措施:是	113.9840248502	22.5348313335	113.9842488502	22.5342203335	段先念	旅游业及与旅游配套的供水、供电、水电安装维修。	8203106415	旅游及其关联产业的投资和管理;房地产开发;自有物业租赁;酒店管理;文化活动的组织策划;会展策划;旅游项目策划;旅游信息咨询;旅游工艺品的销售;投资兴办实业(具体项目另行申报);国内商业(不含专营、专控、专卖商品);经营进出口业务(法律、行政法规、国务院决定禁止的项目除外,限制的项目须取得许可后方可经营)。	000069IR@chinaoct.com		www.octholding.com	CNE000000SS0
102272	000100	TCL集团	2015-12-31	TCL集团股份有限公司	计算机、通信和其他电子设备制造业	C39	广东省惠州市仲恺高新技术开发区十九号小区	广东省惠州市仲恺高新区惠风三路17号TCL科技大厦	1997-07-17	2004-01-30	广东省	惠州市	516006	廖骞	0755-33968898	0755-33313819	ir@tcl.com	王建勋		出售重大股权情况： 临时公告名称：关于重组惠州高盛达科技有限公司暨关联交易的公告 临时公告披露日期：2015年3月3日 临时公告披露网站名称：巨潮资讯网（http://www.cninfo.com.cn）	114.3539556802	23.0296183498	114.3538646802	23.0301603498	李东生	业务主要涉及多媒体电子、通讯、家电、信息、电工和部品等六大产业群。	12228359702	本公司及其附属子公司(统称“本公司”)主要从事研究、开发、生产、销售电子产品及通讯设备、新型光电、液晶显示器件，五金交电，VCD、DVD视盘机，家庭影院系统，电子计算机及配件，电池，数字卫星电视接收机，建筑材料，普通机械；电子计算机技术服务；货运仓储；影视器材维修；废旧物资回收；在合法取得的土地上进行房地产开发；货物、技术进出口；创业投资业务及创业投资咨询，受托管理其他创业投资机构的创业投资资本，为创业企业提供创业管理服务，参与发起创业投资机构与投资管理顾问机构。	ir@tcl.com		www.tcl.com	CNE000001GL8
102272	000100	TCL集团	2016-12-31	TCL集团股份有限公司	计算机、通信和其他电子设备制造业	C39	广东省惠州市仲恺高新技术开发区十九号小区	广东省惠州市仲恺高新区惠风三路17号TCL科技大厦	1997-07-17	2004-01-30	广东省	惠州市	516001	廖骞	0755-33311666	0755-33313819	ir@tcl.com	王建勋	91441300195971850Y	出售重大资产情况:临时公告名称:向得润电子出售资产;披露日期:2016年1月6日;临时报告披露网站查询索引:巨潮资讯网(http://www.cninfo.com.cn);出售重大股权情况:交易对方:希杰大韩通运(中国)投资有限公司;被出售股权:深圳速必达商务服务有限公司股权;出售日:2016年7月31日;交易价格(万元):48,000;本期初起至出售日该股权为上市公司贡献的净利润(万元):-;出售对公司的影响:有助于公司供应链能力、电商物流能力及包括IT、供应链咨询、海外货代等在内的业务能力提升,也有助于速必达从内部服务平台向社会化服务平台的转型;股权出售为上市公司贡献的净利润占净利润总额的比例:19.1%;股权出售定价原则:双方协商;是否为关联交易:否;与交易对方的关联关系:不适用;所涉及的股权是否已全部过户:是;是否按计划如期实施,如未按计划实施,应当说明原因及公司已采取的措施:是…	114.3539556802	23.0296183498	114.3538646802	23.0301603498	李东生	业务主要涉及多媒体电子、通讯、家电、信息、电工和部品等六大产业群。	12213682000	研究、开发、生产、销售电子产品及通讯设备、新型光电、液晶显示器件,五金交电,VCD、DVD视盘机,家庭影院系统,电子计算机及配件,电池,数字卫星电视接收机,建筑材料,普通机械;电子计算机技术服务;货运仓储;影视器材维修;废旧物资回收;在合法取得的土地上进行房地产开发;货物、技术进出口;创业投资业务及创业投资咨询,受托管理其他创业投资机构的创业投资资本,为创业企业提供创业管理服务,参与发起创业投资机构与投资管理顾问机构。	ir@tcl.com		www.tcl.com	CNE000001GL8
102272	000100	TCL集团	2017-12-31	TCL集团股份有限公司	计算机、通信和其他电子设备制造业	C39	广东省惠州市仲恺高新技术开发区十九号小区	广东省惠州市仲恺高新区惠风三路17号TCL科技大厦	1997-07-17	2004-01-30	广东省	惠州市	516001	廖骞	0755-33311666	0755-33313819	ir@tcl.com	王建勋	91441300195971850Y	出售重大资产情况:交易对方:惠州亿纬锂能股份有限公司;被出售资产:惠州金能电池有限公司;出售日:2017年12月28日;交易价格(万元):7,359;本期初起至出售日该资产为上市公司贡献的净利润(万元):-;出售对公司的影响:本次重组有利于提升公司产业链的专业分工和协同发展,不会对公司产生重大影响;资产出售为上市公司贡献的净利润占净利润总额的比例:-;资产出售定价原则:-;是否为关联交易:否;与交易对方的关联关系(适用关联交易情形):不适用;所涉及的资产产权是否已全部过户:-;所涉及的债权债务是否已全部转移:-;是否按计划如期实施,如未按计划实施,应当说明原因及公司已采取的措施:-;披露日期:2017年12月29日;披露索引:巨潮资讯网(http://www.cninfo.com.cn);出售重大股权情况:交易对方:紫光科技创业投资有限公司、Oriente Grande Investme…	114.3539556802	23.0296183498	114.3538646802	23.0301603498	李东生	业务主要涉及多媒体电子、通讯、家电、信息、电工和部品等六大产业群。	13514972063	研究、开发、生产、销售电子产品及通讯设备、新型光电、液晶显示器件,五金交电,VCD、DVD视盘机,家庭影院系统,电子计算机及配件,电池,数字卫星电视接收机,建筑材料,普通机械;电子计算机技术服务;货运仓储;影视器材维修;废旧物资回收;在合法取得的土地上进行房地产开发经营;货物及技术进出口;创业投资业务及创业投资咨询,受托管理其他创业投资机构的创业投资资本,为创业企业提供创业管理服务,参与发起创业投资机构与投资管理顾问机构。	ir@tcl.com		www.tcl.com	CNE000001GL8
102272	000100	TCL集团	2018-12-31	TCL集团股份有限公司	计算机、通信和其他电子设备制造业	C39	广东省惠州市仲恺高新技术开发区十九号小区	广东省惠州市仲恺高新区惠风三路17号TCL科技大	1997-07-17	2004-01-30	广东省	惠州市	516001	廖骞	0755-33311666	0755-33313819	ir@tcl.com		91441300195971850Y	出售重大资产情况:交易对方:TCL实业控股(广东)股份有限公司;被出售资产:TCL实业100%股权、惠州家电100%股权、合肥家电100%股权、酷友科技56.50%股权、客音商务100%股权、TCL产业园100%股权、简单汇75%股权、格创东智36.00%股权;出售日:2019年1月7日;交易价格(万元):476,000.00;本期初起至出售日该资产为上市公司贡献的净利润(万元):-;出售对公司的影响:本次交易系公司重组出售消费电子、家电等智能终端业务以及相关配套业务;交易完成后,公司多元化的业务结构将被精简,聚焦半导体显示及材料业务。按照本次重组安排,原属标的公司的TCL集团的高级管理人员已辞去相应的职务。由于报告期内,标的资产尚未出表,因而本次重组对公司报告期内财务状况及经营成果无影响;资产出售为上市公司贡献的净利润占净利润总额的比例:-;资产出售定价原则:参照标的资产评估值,经交易…	114.3541826802	23.0296143498	114.3538646802	23.0301603498	李东生	业务主要涉及多媒体电子、通讯、家电、信息、电工和部品等六大产业群。	13549648507	研究、开发、生产、销售电子产品及通讯设备、新型光电、液晶显示器件,五金交电,VCD、DVD视盘机,家庭影院系统,电子计算机及配件,电池,数字卫星电视接收机,建筑材料,普通机械;电子计算机技术服务;货运仓储;影视器材维修;废旧物资回收;在合法取得的土地上进行房地产开发经营;货物及技术进出口;创业投资业务及创业投资咨询,受托管理其他创业投资机构的创业投资资本,为创业企业提供创业管理服务,参与发起创业投资机构与投资管理顾问机构。	ir@tcl.com		www.tcl.com	CNE000001GL8
101842	000156	华数传媒	2015-12-31	华数传媒控股股份有限公司	广播、电视、电影和影视录音制作业	R86	浙江省杭州市滨江区江南大道3850号创新大厦15楼1505室	浙江省杭州市西湖区莲花街333号莲花商务中心A座8楼	1994-06-30	2000-09-06	浙江省	杭州市	310012	王颖轶	0571-28327789	0571-28327791	000156@wasu.com	吴帅		报告期内公司无收购及出售资产、吸收合并事项	120.0996859386	30.2695493216	120.1612583069	30.1836517441	王健儿	杭州地区有线电视网络及全国范围内新媒体业务。	1433351902	有线电视、数字电视网络及产业投资，数字通信产业投资，互 联网及电视传媒信息服务产业投资。	ss000156@163.com		www.wasu.com	CNE0000014L0
101842	000156	华数传媒	2016-12-31	华数传媒控股股份有限公司	广播、电视、电影和影视录音制作业	R86	浙江省杭州市滨江区江南大道3850号创新大厦15楼1505室	浙江省杭州市滨江区天马路79号华数白马湖数字电视产业园B座9楼	1994-06-30	2000-09-06	浙江省	杭州市	310052	王颖轶	0571-28327789	0571-28327791	000156@wasu.com	洪方磊	91330000189080365C	报告期内公司无收购及出售资产、吸收合并事项	120.1610543069	30.1838257441	120.1612583069	30.1836517441	王健儿	杭州地区有线电视网络及全国范围内新媒体业务。	1433351902	有线电视、数字电视网络及产业投资,数字通信产业投资,互联网及电视传媒信息服务产业投资。	ss000156@163.com		www.wasu.com	CNE0000014L0
103592	000157	中联重科	2015-12-31	中联重科股份有限公司	专用设备制造业	C35	湖南省长沙市银盆南路361号	湖南省长沙市银盆南路361号	1999-08-31	2000-10-12	湖南省	长沙市	410013	申柯	0731-85650157	0731-85651157	157@zoomlion.com	郭慆		报告期内公司无收购及出售资产、吸收合并事项	112.9539838599	28.2210866805	112.9540428599	28.2210206805	詹纯新	开发、生产、销售建筑业重大装备及新材料。	7664132250	开发、生产、销售工程机械、环卫机械、汽车起重机及其专用底盘、消防车辆及其专用底盘、其它机械设备、金属与非金属材料、光机电一体化高新技术产品并提供租赁、售后技术服务；销售建筑装饰材料（不含硅酮胶）、工程专用车辆（不含乘用车）及政策允许的金属材料、化工原料、化工产品；经营商品和技术的进出口业务（不涉及国营贸易管理商品，涉及配额、许可证管理商品的按国家有关规定办理申请）；房地产业投资。	157@zoomlion.com	01157	www.zoomlion.com	CNE000001527
103592	000157	中联重科	2016-12-31	中联重科股份有限公司	专用设备制造业	C35	湖南省长沙市银盆南路361号	湖南省长沙市银盆南路361号	1999-08-31	2000-10-12	湖南省	长沙市	410013	申柯	0731-85650157	0731-85651157	157@zoomlion.com	郭慆	914300007121944054	报告期内公司无收购及出售资产、吸收合并事项	112.9539838599	28.2210866805	112.9540428599	28.2210206805	詹纯新	开发、生产、销售建筑业重大装备及新材料。	7664132250	开发、生产、销售工程机械、环卫机械、汽车起重机及其专用底盘、消防车辆及其专用底盘、其它机械设备、金属与非金属材料、光机电一体化高新技术产品并提供租赁、售后技术服务;销售建筑装饰材料(不含硅酮胶)、工程专用车辆(不含乘用车)及政策允许的金属材料、化工原料、化工产品;经营商品和技术的进出口业务(不涉及国营贸易管理商品,涉及配额、许可证管理商品的按国家有关规定办理申请);房地产业投资。	157@zoomlion.com	01157	www.zoomlion.com	CNE000001527
103592	000157	中联重科	2017-12-31	中联重科股份有限公司	专用设备制造业	C35	湖南省长沙市银盆南路361号	湖南省长沙市银盆南路361号	1999-08-31	2000-10-12	湖南省	长沙市	410013	申柯	0731-85650157	0731-85651157	157@zoomlion.com	郭慆	914300007121944054	出售重大股权情况:交易对方:盈峰投资控股集团有限公司、广州粤民投盈联投资合伙企业(有限合伙)、上海绿联君和产业并购股权投资基金合伙企业(有限合伙)、弘创(深圳)投资中心(有限合伙);被出售股权:长沙中联重科环境产业有限公司80%的股权;出售日:2017年05月21日;交易价格(万元):1,160,000;本期初起至出售日该股权为上市公司贡献的净利润(万元):19,081.14;出售对公司的影响:本次交易完成后,公司将持有环境产业公司20%股权,环境产业公司不再纳入公司合并报表范围,剩余股权将通过权益法核算。从财务指标角度来看,通过本次交易,公司将取得116亿元的现金,公司的资产流动性将大大得到改善;同时,公司财务稳健性将大大提高,公司持续发展能力更强;股权出售为上市公司贡献的净利润占净利润总额的比例:749.62%;股权出售定价原则:本次交易定价为公司与交易对方根据环境业务板块的过往盈利…	112.9539838599	28.2210866805	112.9540428599	28.2210206805	詹纯新	开发、生产、销售建筑业重大装备及新材料。	7794048075	开发、生产、销售工程机械、环卫机械、汽车起重机及其专用底盘、消防车辆及其专用底盘、其它机械设备、金属与非金属材料、光机电一体化高新技术产品并提供租赁、售后技术服务;销售建筑装饰材料(不含硅酮胶)、工程专用车辆(不含乘用车)及政策允许的金属材料、化工原料、化工产品;经营商品和技术的进出口业务(不涉及国营贸易管理商品,涉及配额、许可证管理商品的按国家有关规定办理申请);房地产业投资。	157@zoomlion.com	01157	www.zoomlion.com	CNE000001527
103592	000157	中联重科	2018-12-31	中联重科股份有限公司	专用设备制造业	C35	湖南省长沙市银盆南路361号	湖南省长沙市银盆南路361号	1999-08-31	2000-10-12	湖南省	长沙市	410013	杨笃志	0731-85650157	0731-85651157	157@zoomlion.com	郭慆	914300007121944054	报告期内公司无收购及出售资产、吸收合并事项	112.9539838599	28.2210866805	112.9540428599	28.2210206805	詹纯新	开发、生产、销售建筑业重大装备及新材料。	7808536633	开发、生产、销售工程机械、环卫机械、汽车起重机及其专用底盘、消防车辆及其专用底盘、其它机械设备、金属与非金属材料、光机电一体化高新技术产品并提供租赁、售后技术服务;销售建筑装饰材料(不含硅酮胶)、工程专用车辆(不含乘用车)及政策允许的金属材料、化工原料、化工产品;经营商品和技术的进出口业务(不涉及国营贸易管理商品,涉及配额、许可证管理商品的按国家有关规定办理申请);房地产业投资。	157@zoomlion.com	01157	www.zoomlion.com	CNE000001527
104100	000166	申万宏源	2015-12-31	申万宏源集团股份有限公司	资本市场服务	J67	新疆乌鲁木齐市高新区北京南路358号大成国际大厦20楼2001室	新疆维吾尔自治区乌鲁木齐市文艺路233号宏源大厦,北京市西城区太平桥大街19号	1996-09-16	2015-01-26	新疆维吾尔自治区	乌鲁木齐市	830002,100033	阳昌云	0991-2301870	0991-2301779	swhy@swhygh.com	徐亮	91650000132278661Y	收购、出售资产、企业合并事项: 申银万国证券换股吸收合并宏源证券的重大资产重组方案于2014年12月1 日取 得中国证监会的核准，并于2015年1 月完成了合并。（详见2015年1 月22日、2015 年4 月30 日刊登在《中国证券报》、《上海证券报》、《证券时报》和巨潮资讯网 （http://www.cninfo.com.cn）的《申万宏源集团股份有限公司换股吸收合并宏源证券股 份有限公司上市公告书》，《申万宏源集团2014年年度报告》）	87.6173270904	43.7980767537	87.5700201181	43.8537271454	陈亮	金融投资、股权投资等	14856744977	证券经纪业务、融资融券业务、证券自营业务、 证券承销与保荐业务、证券资产管理业务、基金管理业务、股票期权做市、期 货经纪业务、直接投资业务和创新投资业务等。	swhy@swhygh.com		www.swhygh.com	CNE100002FD4
104100	000166	申万宏源	2016-12-31	申万宏源集团股份有限公司	资本市场服务	J67	新疆维吾尔自治区乌鲁木齐市高新区北京南路358号大成国际大厦20楼2001室	新疆维吾尔自治区乌鲁木齐市高新区北京南路358号大成国际大厦20楼;北京市西城区太平桥大街19号	1996-09-16	2015-01-26	新疆维吾尔自治区	乌鲁木齐市	830011,100033	阳昌云	0991-2301870	0991-2301779	swhy@swhygh.com	徐亮	91650000132278661Y	报告期内公司无收购及出售资产、吸收合并事项	87.5703321181	43.8536601454	87.5700201181	43.8537271454	陈亮	金融投资、股权投资等	20056605718	证券经纪业务、融资融券业务、证券自营业务、证券承销与保荐业务、证券资产管理业务、基金管理业务、股票期权做市业务、期货经纪业务、直接投资业务和创新投资业务等。	swhy@swhygh.com		www.swhygh.com	CNE100002FD4
104100	000166	申万宏源	2017-12-31	申万宏源集团股份有限公司	资本市场服务	J67	新疆维吾尔自治区乌鲁木齐市高新区北京南路358号大成国际大厦20楼2001室	新疆维吾尔自治区乌鲁木齐市高新区北京南路358号大成国际大厦20楼,北京市西城区太平桥大街19号	1996-09-16	2015-01-26	新疆维吾尔自治区	乌鲁木齐市	830011,100033	阳昌云	0991-2301870	0991-2301779	swhy@swhygh.com	徐亮	91650000132278661Y	报告期内公司无收购及出售资产、吸收合并事项	87.5703321181	43.8536601454	87.5700201181	43.8537271454	陈亮	金融投资、股权投资等	20056605718	证券经纪业务、融资融券业务、证券自营业务、证券承销与保荐业务、证券资产管理业务、基金管理业务、股票期权做市业务、期货经纪业务、直接投资业务和创新投资业务等。	swhy@swhygh.com		www.swhygh.com	CNE100002FD4
104100	000166	申万宏源	2018-12-31	申万宏源集团股份有限公司	资本市场服务	J67	新疆维吾尔自治区乌鲁木齐市高新区北京南路358号大成国际大厦20楼2001室	新疆维吾尔自治区乌鲁木齐市高新区北京南路358号大成国际大厦20楼;北京市西城区太平桥大街19号	1996-09-16	2015-01-26	新疆维吾尔自治区	乌鲁木齐市	830011,100033	阳昌云	0991-2301870	0991-2301779	swhy@swhygh.com	徐亮	91650000132278661Y	报告期内公司无收购及出售资产、吸收合并事项	87.5700201181	43.8537271454	87.5700201181	43.8537271454	陈亮	金融投资、股权投资等	22535944560	证券经纪业务、融资融券业务、证券自营业务、证券承销与保荐业务、证券资产管理业务、基金管理业务、股票期权做市业务、期货经纪业务、直接投资业务和创新投资业务等。	swhy@swhygh.com		www.swhygh.com	CNE100002FD4
106591	000333	美的集团	2015-12-31	美的集团股份有限公司	电气机械及器材制造业	C38	广东省佛山市顺德区北滘镇美的大道6号美的总部大楼B区26-28楼	广东省佛山市顺德区北滘镇美的大道6号美的总部大楼B区26-28楼	2000-04-07	2013-09-18	广东省	佛山市	528311	江鹏	0757-22607708	0757-26651991	IR@midea.com	欧云彬		报告期内公司无收购及出售资产、吸收合并事项	113.2195829504	22.9346936606	113.2198439504	22.9348316606	方洪波	以家电产业为主，涉足电机、物流等领域，旗下分为四大业务板块，分别为大家电、小家电、电机及物流。	4266839449	家用电器、电机及其零部件的生产及销售，以及物流配送；其他业务包括家 电原材料销售、批发及加工业务，以及从事吸收存款、同业拆借、消费信贷、买 方信贷及融资租赁等金融业务。	groupir@midea.com.cn		www.midea.com	CNE100001QQ5
106591	000333	美的集团	2016-12-31	美的集团股份有限公司	电气机械及器材制造业	C38	广东省佛山市顺德区北滘镇美的大道6号美的总部大楼	广东省佛山市顺德区北滘镇美的大道6号美的总部大楼	2000-04-07	2013-09-18	广东省	佛山市	528311	江鹏	0757-22607708	0757-26605456	IR@midea.com	欧云彬	91440606722473344C	报告期内公司无收购及出售资产、吸收合并事项	113.2195829504	22.9346936606	113.2198439504	22.9348316606	方洪波	以家电产业为主，涉足电机、物流等领域，旗下分为四大业务板块，分别为大家电、小家电、电机及物流。	6458766808	家用电器、电机及其零部件的生产销售,以及物流配送;其他业务包括家电原材料销售、批发及加工业务,以及从事吸收存款、同拆借、消费信贷、买方信贷及融资租赁等金业务	groupir@midea.com.cn		www.midea.com	CNE100001QQ5
106591	000333	美的集团	2017-12-31	美的集团股份有限公司	电气机械及器材制造业	C38	广东省佛山市顺德区北滘镇美的大道6号美的总部大楼	广东省佛山市顺德区北滘镇美的大道6号美的总部大楼	2000-04-07	2013-09-18	广东省	佛山市	528311	江鹏	0757-22607708	0757-26605456	IR@midea.com	欧云彬	91440606722473344C	报告期内公司无收购及出售资产、吸收合并事项	113.2195829504	22.9346936606	113.2198439504	22.9348316606	方洪波	以家电产业为主，涉足电机、物流等领域，旗下分为四大业务板块，分别为大家电、小家电、电机及物流。	6561053319	家用电器、电机及其零部件的生产及销售,机器人及工业自动化系统方案设计和实施,以及物流配送;其他业务包括家电原材料销售、批发及加工业务,以及从事吸收存款、同业拆借、消费信贷、买方信贷及融资租赁等金融业务。	groupir@midea.com.cn		www.midea.com	CNE100001QQ5
106591	000333	美的集团	2018-12-31	美的集团股份有限公司	电气机械及器材制造业	C38	广东省佛山市顺德区北滘镇美的大道6号美的总部大楼	广东省佛山市顺德区北滘镇美的大道6号美的总部大楼	2000-04-07	2013-09-18	广东省	佛山市	528311	江鹏	0757-22607708	0757-26605456	IR@midea.com	欧云彬	91440606722473344C	报告期内公司无收购及出售资产、吸收合并事项	113.2198439504	22.9348316606	113.2198439504	22.9348316606	方洪波	以家电产业为主，涉足电机、物流等领域，旗下分为四大业务板块，分别为大家电、小家电、电机及物流。	6663030506	家用空调、中央空调、供暖及通风系统为核心的暖通空调业务;以厨房家电、冰箱、洗衣机及各类小家电为核心的消费电器业务;以KUKAAktiengesellschaft(以下简称“KUKA”)及其子公司(以下简称“KUKA集团”)和其他美的机器人公司等为核心的机器人及自动化系统业务;其他业务包括以安得智联为智能供应链集成解决方案的服务平台、家电原材料销售、批发及加工业务,以及从事吸收存款、同业拆借、消费信贷、买方信贷及融资租赁等金融业务。	groupir@midea.com.cn		www.midea.com	CNE100001QQ5
102980	000338	潍柴动力	2015-12-31	潍柴动力股份有限公司	汽车制造业	C36	山东省潍坊市高新技术产业开发区福寿东街197号甲	山东省潍坊市高新技术产业开发区福寿东街197号甲	2002-12-23	2004-03-11	山东省	潍坊市	261061	戴立新	0536-2297068	0536-8197073	dailx@weichai.com	王丽		报告期内公司无收购及出售资产、吸收合并事项	119.1524955908	36.7202955416	119.2099364547	36.7259232813	谭旭光	生产及销售柴油机及相关零部件，以及为柴油机及配套产品的设计、开发、生产、销售及维修	3998619278	柴油机及配套产品，汽车(小轿车除外)，汽车车桥及零部件，汽车变速器及零部件以及其他汽车零部件，液压泵、液压马达、液压阀门、齿轮和齿轮传动装置、液压元件附属铸件和铸造品的设计、开发、生产、销售、维修、进出口；技术咨询和技术服务；自有房租租赁、钢材销售、企业管理服务；叉车及仓库技术服务(涉及行政许可的凭许可证经营)。	weichai@weichai.com	02338	www.weichaipower.com	CNE1000000D4
102980	000338	潍柴动力	2016-12-31	潍柴动力股份有限公司	汽车制造业	C36	山东省潍坊市高新技术产业开发区福寿东街197号甲	山东省潍坊市高新技术产业开发区福寿东街197号甲	2002-12-23	2004-03-11	山东省	潍坊市	261061	戴立新	0536-2297068	0536-8197073	dailx@weichai.com	王丽	913700007456765902	报告期内公司无收购及出售资产、吸收合并事项	119.1524955908	36.7202955416	119.2099364547	36.7259232813	谭旭光	生产及销售柴油机及相关零部件，以及为柴油机及配套产品的设计、开发、生产、销售及维修	3998619278	柴油机及配套产品,汽车,汽车车桥及零部件,汽车变速器及零部件以及其他汽车零部件液压泵、液压马达、液压阀门、齿轮和齿轮传动装置、液压元件附属铸件和铸造品、内燃机、新能源动力总成系统及配套产品的设计、开发、生产、销售、维修、进出口;技术咨询和技术服务;自有房租租赁、钢材销售、企业管理服务;叉车生产、仓库技术及供应链解决方案服务。以上经营范围涉及行政许可的凭许可证经营	weichai@weichai.com	02338	www.weichaipower.com	CNE1000000D4
102980	000338	潍柴动力	2017-12-31	潍柴动力股份有限公司	汽车制造业	C36	山东省潍坊市高新技术产业开发区福寿东街197号甲	山东省潍坊市高新技术产业开发区福寿东街197号甲	2002-12-23	2004-03-11	山东省	潍坊市	261061	戴立新	0536-2297068	0536-8197073	dailx@weichai.com	王丽	913700007456765902	报告期内公司无收购及出售资产、吸收合并事项	119.1524955908	36.7202955416	119.2099364547	36.7259232813	谭旭光	生产及销售柴油机及相关零部件，以及为柴油机及配套产品的设计、开发、生产、销售及维修	7997238556	柴油机及配套产品,汽车,汽车车桥及零部件,汽车变速器及零部件以及其他汽车零部件,液压泵、液压马达、液压阀门、齿轮和齿轮传动装置、液压元件附属铸件和铸造品、内燃机、新能源动力总成系统及配套产品的设计、开发、生产、销售、维修、进出口;技术咨询和技术服务;自有房租租赁、钢材销售、企业管理服务;叉车生产、仓库技术及供应链解决方案服务。以上经营范围涉及行政许可的凭许可证经营。	weichai@weichai.com	02338	www.weichaipower.com	CNE1000000D4
102980	000338	潍柴动力	2018-12-31	潍柴动力股份有限公司	汽车制造业	C36	山东省潍坊市高新技术产业开发区福寿东街197号甲	山东省潍坊市高新技术产业开发区福寿东街197号甲	2002-12-23	2004-03-11	山东省	潍坊市	261061	郝庆贵	0536-2297068	0536-8197073	haoqg@weichai.com	王丽	913700007456765902	报告期内公司无收购及出售资产、吸收合并事项	119.1524955908	36.7202955416	119.2099364547	36.7259232813	谭旭光	生产及销售柴油机及相关零部件，以及为柴油机及配套产品的设计、开发、生产、销售及维修	7997238556	柴油机及配套产品,汽车,汽车车桥及零部件,汽车变速器及零部件以及其他汽车零部件,液压泵、液压马达、液压阀门、齿轮和齿轮传动装置、液压元件附属铸件和铸造品、内燃机、新能源动力总成系统及配套产品的设计、开发、生产、销售、维修、进出口;技术咨询和技术服务;自有房屋租赁、钢材销售、企业管理服务;叉车生产、仓库技术及供应链解决方案服务。以上经营范围涉及行政许可的凭许可证经营。	weichai@weichai.com	02338	www.weichaipower.com	CNE1000000D4
101862	000402	金融街	2015-12-31	金融街控股股份有限公司	房地产业	K70	北京市西城区金融大街丙17号北京银行大厦11层	北京市西城区金城坊街7号	1954-01-01	1996-06-26	北京市	北京市	100033	张晓鹏	010-66573955,66573088	010-66573956	investors@jrjkg.com	吕国强		报告期内公司无收购及出售资产、吸收合并事项	116.3628213807	39.9172824338	116.3586213807	39.9161984338	高靓	房地产开发、物业管理、高科技及产品投资开发。	2988929907	房地产开发，销售商品房；物业管理；新技术及产品项目 投资；技术开发；技术服务；技术咨询；停车服务；出租办公用房、商业用房；健身 服务；劳务服务；打字；复印；会议服务；技术培训；承办展览展示；饭店管理；餐 饮管理；企业形象策划；组织文化交流活动；销售百货、工艺美术品、建筑材料、机 械电气设备安装；货物进出口、技术进出口、代理进出口	investors@jrjkg.com		www.jrjkg.com.cn	CNE000000KT5
101862	000402	金融街	2016-12-31	金融街控股股份有限公司	房地产业	K70	北京市西城区金城坊街7号	北京市西城区金城坊街7号	1954-01-01	1996-06-26	北京市	北京市	100033	张晓鹏	010-66573955,66573088	010-66573956	investors@jrjkg.com	范文	9111000020283066XF	报告期内公司无收购及出售资产、吸收合并事项	116.3628213807	39.9172824338	116.3622683807	39.9168694338	高靓	房地产开发、物业管理、高科技及产品投资开发。	2988929907	房地产开发,销售商品房;物业管理;新技术及产品项目投资;技术开发;技术服务;技术咨询;停车服务;出租办公用房、商业用房;健身服务;劳务服务;打字;复印;会议服务;技术培训;承办展览展示;饭店管理;餐饮管理;企业形象策划;组织文化交流活动;销售百货、工艺美术品、建筑材料、机械电气设备安装;货物进出口、技术进出口、代理进出口;以下项目仅限分公司经营:住宿、游泳池、网球场、中西餐、冷、热饮、糕点、美容美发、洗浴、零售烟卷、图书期刊。	investors@jrjkg.com		www.jrjkg.com.cn	CNE000000KT5
101862	000402	金融街	2017-12-31	金融街控股股份有限公司	房地产业	K70	北京市西城区金城坊街7号	北京市西城区金城坊街7号	1954-01-01	1996-06-26	北京市	北京市	100033	张晓鹏	010-66573955,66573088	010-66573956	investors@jrjkg.com	范文	9111000020283066XF	报告期内公司无收购及出售资产、吸收合并事项	116.3628213807	39.9172824338	116.3622683807	39.9168694338	高靓	房地产开发、物业管理、高科技及产品投资开发。	2988929907	房地产开发,销售商品房;物业管理;新技术及产品项目投资;技术开发;技术服务;技术咨询;停车服务;出租办公用房、商业用房;健身服务;劳务服务;打字;复印;会议服务;技术培训;承办展览展示;饭店管理;餐饮管理;企业形象策划;组织文化交流活动;销售百货、工艺美术品、建筑材料、机械电气设备安装;货物进出口、技术进出口、代理进出口	investors@jrjkg.com		www.jrjkg.com.cn	CNE000000KT5
101862	000402	金融街	2018-12-31	金融街控股股份有限公司	房地产业	K70	北京市西城区金城坊街7号	北京市西城区金城坊街7号	1954-01-01	1996-06-26	北京市	北京市	100033	张晓鹏	010-66573955,66573088	010-66573956	investors@jrjkg.com	范文	9111000020283066XF	报告期内公司无收购及出售资产、吸收合并事项	116.3628213807	39.9172824338	116.3622683807	39.9168694338	高靓	房地产开发、物业管理、高科技及产品投资开发。	2988929907	房地产开发,销售商品房;物业管理;新技术及产品项目投资;技术开发;技术服务;技术咨询;停车服务;出租办公用房、商业用房;健身服务;劳务服务;打字;复印;会议服务;技术培训;承办展览展示;饭店管理;餐饮管理;企业形象策划;组织文化交流活动;销售百货、工艺美术品、建筑材料、机械电气设备安装;货物进出口、技术进出口、代理进出口	investors@jrjkg.com		www.jrjkg.com.cn	CNE000000KT5
101731	000408	藏格控股	2018-12-31	藏格控股股份有限公司	化学原料及化学制品制造业	C26	青海省格尔木市昆仑南路15-02号	青海省格尔木市昆仑南路15-02号	1996-06-25	1996-06-28	青海省	格尔木市	081600	蒋秀恒	028-65531312	0979-8433995	jxh_000408@163.com	曹东林	9113040060115569X8	报告期内公司无收购及出售资产、吸收合并事项	94.9033768034	36.3917724125	94.9033768034	36.3917724125	肖永明	陶瓷制品，电线电缆，通讯产品。	1993779522	投资与投资管理、资产管理;投资咨询;钾肥、化肥、工业盐、农药(不含属于危险化学品的农药)销售;氯化镁经销;矿产品、百货、针纺织品、五金交电、机械设备、化工产品(不含危险化学品)、铁矿石、首饰、玉石、日用杂货、装饰材料、工艺品、花草、文化用品、建筑材料、有色金属、矿石、建材、钢材、水泥、煤炭销售(国家有专项规定的除外);销售陶瓷产品、陶瓷原辅材料;酒店和物业管理;仓储;通讯设备、电子产品、家用电器、计算机系统工程建设、软件开发、硬件销售、维护,计算机耗材销售,技术培训(有专项规定的除外)、房屋租赁;货物进出口、技术的进出口。出口自产的化学品(不含危险化学品),进口本企业生产、科研所需要的原材料、机电设备、仪器仪表及零配件;道路普通货物运输。(以上经营范围依法须经批准的项目,经相关部门批准后方可开展经营活动)。	zgjf000408@163.com		www.zanggegf.com	CNE000000L08
101724	000413	东旭光电	2015-12-31	东旭光电科技股份有限公司	计算机、通信和其他电子设备制造业	C39	河北省石家庄市高新技术产业开发区黄河大道9号	北京市海淀区复兴路甲23号临5院	1992-12-26	1996-07-08	河北省	石家庄市	100036	龚昕	010-68297016	010-68297016	gongxin_dx@126.com	王青飞		报告期内公司无收购及出售资产、吸收合并事项	116.3075530324	39.9084176659	114.5954601882	38.0444434333	李兆廷	黑白显像管和黑白玻壳。	3835000526	电真空玻璃器件及配套的电子元器件、汽车零配件的生产与销售及售后服务;经营本企业自产产品的出口业务和本企业所需的机械设备、零配件、原辅材料的进口业务(国家限定公司经营或禁止进出口的商品及技术除外),平板显示玻璃基板产业投资、建设与运营及相关的技术开发、技术咨询、技术服务、技术转让;氢气(52.23吨/年)的生产(有效期至2015年6月30日止(法律、法规及国务院决定禁止或限制的事项,不得经营;需其它部门审批的事项,待批准后,方可经营)。	bs@bseg.cn	200413	www.dongxuguangdian.com.cn	CNE000000578
101724	000413	东旭光电	2016-12-31	东旭光电科技股份有限公司	计算机、通信和其他电子设备制造业	C39	河北省石家庄市高新区黄河大道9号	北京市海淀区复兴路甲23号临5院	1992-12-26	1996-07-08	河北省	石家庄市	100036	龚昕	010-68297016	010-68297016	gongxin_dx@126.com	王青飞	911301001043959836	报告期内公司无收购及出售资产、吸收合并事项	116.3075530324	39.9084176659	114.5954601882	38.0444434333	李兆廷	黑白显像管和黑白玻壳。	4939928983	电真空玻璃器件及配套的电子元器件、汽车零配件的生产与销售及售后服务;经营本企业自产产品的出口业务和本企业所需的机械设备、零配件、原辅材料的进口业务(国家限定公司经营或禁止进出口的商品及技术除外),平板显示玻璃基板产业投资、建设与运营及相关的技术开发、技术咨询、技术服务、技术转让.(依法须经批准的项目,经相关部门批准后方可开展经营活动)	bs@bseg.cn	200413	www.dongxuguangdian.com.cn	CNE000000578
101724	000413	东旭光电	2017-12-31	东旭光电科技股份有限公司	计算机、通信和其他电子设备制造业	C39	河北省石家庄市高新区黄河大道9号	北京市海淀区复兴路甲23号临5院	1992-12-26	1996-07-08	河北省	石家庄市	100036	龚昕	010-68297016	010-68297016	gongxin_dx@126.com	王青飞	911301001043959836	报告期内公司无收购及出售资产、吸收合并事项	116.3075530324	39.9084176659	114.5954601882	38.0444434333	李兆廷	黑白显像管和黑白玻壳。	5730250118	电真空玻璃器件及配套的电子元器件、汽车零配件的生产与销售及售后服务;经营本企业自产产品的出口业务和本企业所需的机械设备、零配件、原辅材料的进口业务(国家限定公司经营或禁止进出口的商品及技术除外),平板显示玻璃基板产业投资、建设与运营及相关的技术开发、技术咨询、技术服务、技术转让.(依法须经批准的项目,经相关部门批准后方可开展经营活动)	bs@bseg.cn	200413	www.dongxuguangdian.com.cn	CNE000000578
101724	000413	东旭光电	2018-12-31	东旭光电科技股份有限公司	计算机、通信和其他电子设备制造业	C39	河北省石家庄市高新区黄河大道9号	北京市西城区菜园街1号	1992-12-26	1996-07-08	河北省	石家庄市	100053	龚昕	010-63541061	010-63541061	gongxin_dx@126.com	王青飞	911301001043959836	出售重大股权情况:交易对方:东旭科技集团有限公司;被出售股权:旭友电子材料科技(无锡)有限公司;出售日:2018年04月28日;交易价格(万元):55,000;本期初起至出售日该股权为上市公司贡献的净利润(万元):-1,487.57;出售对公司的影响:无;股权出售为上市公司贡献的净利润占净利润总额的比例:-0.55%;股权出售定价原则:依据经审计的净资产;是否为关联交易:是;与交易对方的关联关系:同一母公司;所涉及的股权是否已全部过户:是;是否按计划如期实施,如未按计划实施,应当说明原因及公司已采取的措施:是;披露日期:2018年04月14日;披露索引:巨潮网http://www.cninfo.com.cn	116.3538636786	39.8806583544	114.5954601882	38.0444434333	王立鹏	黑白显像管和黑白玻壳。	5730250118	电真空玻璃器件及配套的电子元器件、汽车零配件的生产与销售及售后服务;经营本企业自产产品的出口业务和本企业所需的机械设备、零配件、原辅材料的进口业务(国家限定公司经营或禁止进出口的商品及技术除外),平板显示玻璃基板产业投资、建设与运营及相关的技术开发、技术咨询、技术服务、技术转让.(依法须经批准的项目,经相关部门批准后方可开展经营活动)	dxgd@dong-xu.com	200413	www.dongxuguangdian.com.cn	CNE000000578
101742	000415	渤海金控	2015-12-31	渤海金控投资股份有限公司	租赁业	L71	新疆维吾尔自治区乌鲁木齐市黄河路93号汇通大厦	新疆维吾尔自治区乌鲁木齐市新华北路165号广汇中天广场41楼	1993-06-30	1996-07-16	新疆维吾尔自治区	乌鲁木齐市	830002	马伟华	0991-2327723	0991-2327709	weihua_ma@bohaileasing.com	王景然	916500002285973682	报告期内公司无收购及出售资产、吸收合并事项	87.5964439516	43.7854063761	87.6014239516	43.7900753761	汤亮	工程承包、建筑工程施工、工业设备的制作和安装。	6184521282	从事境外飞机租赁业务、集装 箱租赁业务及境内基础设施、高端设备、商业物业、新能源等租赁业务。	bohaileasing@gmail.com		www.bohaileasing.com	CNE0000009B1
101742	000415	渤海金控	2016-12-31	渤海金控投资股份有限公司	租赁业	L71	新疆维吾尔自治区乌鲁木齐市黄河路93号	新疆维吾尔自治区乌鲁木齐市新华北路165号广汇中天场41楼	1993-06-30	1996-07-16	新疆维吾尔自治区	乌鲁木齐市	830002	马伟华	0991-2327723	0991-2327709	weihua_ma@bohaileasing.com	王景然	916500002285973682	报告期内公司无收购及出售资产、吸收合并事项	87.6015139516	43.7901363761	87.6003680616	43.7816623262	金川	工程承包、建筑工程施工、工业设备的制作和安装。	6184521000	飞机租赁业务、集装箱租赁业务及境内基础设施、高端设备、商业物业、新能源等租赁业务。投资保险、证券、银行及互联网金融领域。	bohaileasing@gmail.com		www.bohaileasing.com	CNE0000009B1
101742	000415	渤海金控	2017-12-31	渤海金控投资股份有限公司	租赁业	L71	新疆维吾尔自治区乌鲁木齐市黄河路93号	新疆维吾尔自治区乌鲁木齐市新华北路165号广汇中天广场41楼	1993-06-30	1996-07-16	新疆维吾尔自治区	乌鲁木齐市	830002	王景然	010-57583606	010-57582368	jr.wang1@bohaiholding.com	王佳魏	916500002285973682	报告期内公司无收购及出售资产、吸收合并事项	87.6015139516	43.7901363761	87.6003680616	43.7816623262	卓逸群	工程承包、建筑工程施工、工业设备的制作和安装。	6184521000	飞机租赁业务、集装箱租赁业务及境内基础设施、高端设备、商业物业、新能源等租赁业务。本集团亦投资保险、证券、银行及互联网金融领域。	bohaileasing@gmail.com		www.bohaiholding.com	CNE0000009B1
101742	000415	渤海金控	2018-12-31	渤海租赁股份有限公司	租赁业	L71	新疆维吾尔自治区乌鲁木齐市黄河路93号	新疆维吾尔自治区乌鲁木齐市新华北路165号广汇中天广场39楼	1993-06-30	1996-07-16	新疆维吾尔自治区	乌鲁木齐市	830002	王景然	010-57583606	010-57582368	jr.wang1@bohaileasing.com	王佳魏	916500002285973682	出售重大股权情况:交易对方:ORIX Corporation;安徽省交通控股集团有限公司;被出售股权:Avolon Holdings Limited30%股权;皖江金租35.87%股权;出售日:2018年11月05日;2019年01月08日;交易价格(万元):1,570,982.7;298,187;本期初起至出售日该股权为上市公司贡献的净利润(万元):105,780.19;不适用;出售对公司的影响:公司使用回流的处置对价偿付有息债务,优化了公司的资产结构,降低了资产负债率;有利于提升Avolon的国际信用评级、增强公司持续经营能力及盈利能力;本次出售优化了公司产业及债务结构,降低了公司资产负债率,出售所得资金将用于偿还公司债务及补充运营资金;股权出售为上市公司贡献的净利润占净利润总额的比例:0.00%;不适用;股权出售定价原则:根据Avolon于交割日的账面净资产值(根据国际会计准则编制…	87.6085185916	43.7997011502	87.6003680616	43.7816623262	卓逸群	工程承包、建筑工程施工、工业设备的制作和安装。	6184521000	飞机租赁业务、集装箱租赁业务及境内基础设施、高端设备、商业物业、新能源等租赁业务。	bohaileasing@gmail.com		www.bohaileasing.com	CNE0000009B1
102324	000423	东阿阿胶	2015-12-31	东阿阿胶股份有限公司	医药制造业	C27	山东省东阿县阿胶街78号	山东省聊城市东阿县阿胶街78号	1993-05-28	1996-07-29	山东省	聊城市	252201	吴怀峰	0635-3264069	0635-3260786	wuhf@dongeejiao.com	王鹏		出售重大股权情况： 交易对方：裕昌投资控股集团有限公司 被出售股权：47.295% 出售日：2015年07月03日 交易价格（万元）：4,830 本期初起至出售日该股权为上市公司贡献的净利润（万元）：30.91 出售对公司的影响：无重大影响 股权出售为上市公司贡献的净利润占净利润总额的比例：0.02% 股权出售定价原则：网络竞价 是否为关联交易：否 与交易对方的关联关系：无 所涉及的股权是否已全部过户：是 是否按计划如期实施，如未按计划实施，应当说明原因及公司已采取的措施：是 披露日期：2015年03月19日 披露索引：www.cninfo.com.cn	116.2590882957	36.3425467045	116.2583122957	36.3425267045	秦玉峰	经营和销售医药、化工和轻工产品。	654021537	许可证批准范围内的药品生产、销售,许可证批准范围内的保健食品生产、销售,许可证批准范围内的食品生产、销售,预包装食品批发、零售,许可范围内畜牧养殖、收购、销售;进出口业务;化工产品(不含易燃易爆危险品)销售;以自有资金对外投资;中药材种植、收购。	webmaster@dongeejiao.com		www.dongeejiao.com	CNE0000006Y9
102324	000423	东阿阿胶	2016-12-31	东阿阿胶股份有限公司	医药制造业	C27	山东省聊城市东阿县阿胶街78号	山东省聊城市东阿县阿胶街78号	1993-05-28	1996-07-29	山东省	聊城市	252201	吴怀峰	0635-3264069	0635-3260786	wuhf@dongeejiao.com	王鹏	91370000168130028J	出售重大股权情况:交易对方:丛长利;王卫健;被出售股权:37.5%;36%;出售日:2016年07月15日;2016年07月2日;交易价格(万元):5,700;2958.51;本期初起至出售日该股权为上市公司贡献的净利润(万元):793.04;263.93;出售对公司的影响:3936.64万元;2761.55万元;股权出售为上市公司贡献的净利润占净利润总额的比例:1.8%;1.27%;股权出售定价原则:网络竞价;网络竞价;是否为关联交易:否;否;与交易对方的关联关系:无;无;所涉及的股权是否已全部过户:是;是;是否按计划如期实施,如未按计划实施,应当说明原因及公司已采取的措施:是;是;披露日期:2016年05月21日;2016年05月21日;披露索引:www.cinfo.com.cn;www.cinfo.com.cn	116.2590882957	36.3425467045	116.2583122957	36.3425267045	秦玉峰	经营和销售医药、化工和轻工产品。	654021537	许可证批准范围内的药品生产、销售,许可证批准范围内的保健食品生产、销售,许可证批准范围内的食品生产、销售,预包装食品批发、零售,许可范围内畜牧养殖、收购、销售;进出口业务;化工产品(不含易燃易爆危险品)销售;以自有资金对外投资;中药材种植、收购。	webmaster@dongeejiao.com		www.dongeejiao.com	CNE0000006Y9
102324	000423	东阿阿胶	2017-12-31	东阿阿胶股份有限公司	医药制造业	C27	山东省聊城市东阿县阿胶街78号	山东省聊城市东阿县阿胶街78号	1993-05-28	1996-07-29	山东省	聊城市	252201	吴怀峰	0635-3264069	0635-3260786	wuhf@dongeejiao.com		91370000168130028J	报告期内公司无收购及出售资产、吸收合并事项	116.2590882957	36.3425467045	116.2583122957	36.3425267045	秦玉峰	经营和销售医药、化工和轻工产品。	654021537	许可证批准范围内的药品生产、销售,许可证批准范围内的保健食品生产、销售,许可证批准范围内的食品生产、销售,预包装食品批发、零售,许可范围内畜牧养殖、收购、销售;进出口业务;化工产品(不含易燃易爆危险品)销售;以自有资金对外投资;中药材种植、收购。	webmaster@dongeejiao.com		www.dongeejiao.com	CNE0000006Y9
102324	000423	东阿阿胶	2018-12-31	东阿阿胶股份有限公司	医药制造业	C27	山东省聊城市东阿县阿胶街78号	山东省聊城市东阿县阿胶街78号	1993-05-28	1996-07-29	山东省	聊城市	252201	吴怀峰	0635-3264069	0635-3260786	wuhf@dongeejiao.com	付延	91370000168130028J	报告期内公司无收购及出售资产、吸收合并事项	116.2590882957	36.3425467045	116.2583122957	36.3425267045	秦玉峰	经营和销售医药、化工和轻工产品。	654021537	许可证批准范围内的药品生产、销售,许可证批准范围内的保健食品生产、销售,许可证批准范围内的食品生产、销售,预包装食品批发、零售,许可范围内畜牧养殖、收购、销售;进出口业务;化工产品(不含易燃易爆危险品)销售;以自有资金对外投资;中药材种植、收购。	webmaster@dongeejiao.com		www.dongeejiao.com	CNE0000006Y9
101882	000425	徐工机械	2015-12-31	徐工集团工程机械股份有限公司	专用设备制造业	C35	江苏省徐州经济开发区工业一区	江苏省徐州市经济技术开发区驮蓝山路26号	1993-12-15	1996-08-28	江苏省	徐州市	221004	费广胜	0516-87565621	0516-87565610	fgs@xcmg.com		913203001347934993	出售重大股权情况： 交易对方：徐工（香港）国际发展有限公司；徐工集团 被出售股权：徐工集团巴西投资有限公司90%股权；徐州徐工施维英机械有限公司75%股权 出售日：2015年06月12日；2015年12月10日 交易价格（万元）：37,967.11；67,663.29 本期初起至出售日该股权为上市公司贡献的净利润（万元）：1,641.63；54,490 出售对公司的影响：出售事项对公司业务连续性、管理层稳定性无影响；出售事项对公司业务连续性、管理层稳定性无影响 股权出售为上市公司贡献的净利润占净利润总额的比例：61%；915% 股权出售定价原则：交易以经徐州市人民政府国有资产监督管理委员会备案后的评估报告所载的评估结果为交易价格；交易以经徐州市人民政府国有资产监督管理委员会备案后的评估报告所载的评估结果为交易价格 是否为关联交易：是；是 与交易对方的关联关系：徐工集团是公司的实际控制人，…	117.273639664	34.300252441	117.243416354	34.2912928244	王民	工程机械、建筑工程机械及其配件。	7084287702	工程机械及成套设备、专用汽车、建筑工程机械、矿山机械、环卫机械、商用车、载货汽车、工程机械发动机、通用基础零部件、仪器、仪表制造、加工、销售；环保工程施工；二手机械再制造、收购、销售、租赁。	zqb@xcmg.com		xgjx.xcmg.com	CNE000000FH0
101882	000425	徐工机械	2016-12-31	徐工集团工程机械股份有限公司	专用设备制造业	C35	江苏省徐州市经济技术开发区驮蓝山路26号	江苏省徐州市经济技术开发区驮蓝山路26号	1993-12-15	1996-08-28	江苏省	徐州市	221004	费广胜	0516-87565621	0516-87565610	fgs@xcmg.com		913203001347934993	报告期内公司无收购及出售资产、吸收合并事项	117.273639664	34.300252441	117.272897664	34.301643441	王民	工程机械、建筑工程机械及其配件。	7007727655	工程机械及成套设备、专用汽车、建筑工程机械、矿山机械、环卫机械、商用车、载货汽车、工程机械发动机、通用基础零部件、仪器、仪表制造、加工、销售;环保工程施工;二手机械再制造、收购、销售、租赁	zqb@xcmg.com		xgjx.xcmg.com	CNE000000FH0
101882	000425	徐工机械	2017-12-31	徐工集团工程机械股份有限公司	专用设备制造业	C35	江苏省徐州市经济技术开发区驮蓝山路26号	江苏省徐州市经济技术开发区驮蓝山路26号	1993-12-15	1996-08-28	江苏省	徐州市	221004	费广胜	0516-87565621	0516-87565610	fgs@xcmg.com		913203001347934993	报告期内公司无收购及出售资产、吸收合并事项	117.273639664	34.300252441	117.272897664	34.301643441	王民	工程机械、建筑工程机械及其配件。	7007727655	工程机械及成套设备、专用汽车、建筑工程机械、物料搬运设备及配件、矿山机械、环卫机械、商用车、载货汽车、工程机械发动机、通用基础零部件、仪器、仪表、衡器制造、加工、销售、维修;环保工程施工;二手车机械再制造、收购、销售、租赁。(依法须经批准的项目,经相关部门批准后方可开展经营活动)	zqb@xcmg.com		xgjx.xcmg.com	CNE000000FH0
101882	000425	徐工机械	2018-12-31	徐工集团工程机械股份有限公司	专用设备制造业	C35	江苏省徐州市经济技术开发区驮蓝山路26号	江苏省徐州市经济技术开发区驮蓝山路26号	1993-12-15	1996-08-28	江苏省	徐州市	221004	费广胜	0516-87565621	0516-87565610	fgs@xcmg.com		913203001347934993	报告期内公司无收购及出售资产、吸收合并事项	117.273639664	34.300252441	117.272897664	34.301643441	王民	工程机械、建筑工程机械及其配件。	7833668430	工程机械及成套设备、专用汽车、建筑工程机械、物料搬运设备及配件、矿山机械、环卫机械、商用车、载货汽车、工程机械发动机、通用基础零部件、仪器、仪表、衡器制造、加工、销售、维修;环保工程施工;二手车机械再制造、收购、销售、租赁。	zqb@xcmg.com		xgjx.xcmg.com	CNE000000FH0
101480	000503	海虹控股	2015-12-31	海虹企业(控股)股份有限公司	互联网和相关服务	I64	海南省海口市文华路18号文华大酒店七层	海南省海口市文华路18号文华大酒店七层	1991-09-26	1992-11-30	海南省	海口市	570105	肖琴	010-64424355	0898-68510496	IR@SEARAINBOW.COM	刘雯雯		出售重大股权情况: 交易对方:中海恒实业发展有限公司 被出售股权:北京威邦物业管理有限公司 出售日:2015年09月30日 交易价格（万元）:18,367.23 本期初起至出售日该股权为上市公司贡献的净利润（万元）:-229 出售对公司的影响:实现投资收益131,767,385.7元 股权出售为上市公司贡献的净利润占净利润总额的比例:571.00% 股权出售定价原则:合同 是否为关联交易:是 与交易对方的关联关系:控股股东 所涉及的股权是否已全部过户:是 是否按计划如期实施，如未按计划实施，应当说明原因及公司已采取的措施:是 披露日期:2015年12月04日 披露索引:公告编号：2015-63、2015-72	110.2999626088	20.0219000265	110.3002296088	20.0216390265	康健	化纤、服装及房地产、投资业务等。	898822204	主要服务为大健康服务产业，包括医药电子交易及电子商务业务、PBM业务及海虹新健康业务	IR@searainbow.com		WWW.SEARAINBOW.COM	CNE000000255
101480	000503	海虹控股	2016-12-31	海虹企业(控股)股份有限公司	互联网和相关服务	I64	海南省海口市文华路18号君华海逸大酒店(原文华大酒店)七层	海南省海口市文华路18号君华海逸大酒店(原文华大酒店)七层	1991-09-26	1992-11-30	海南省	海口市	570105	肖琴	010-64424355	0898-68510496	IR@SEARAINBOW.COM	刘雯雯	914600002012808546	出售重大股权情况:交易对方:中海恒实业发展有限公司;康驰;中海恒实业发展有限公司;康驰;FAYYEH;被出售股权:北京海虹药通电子商务有限公司;北京海虹药通电子商务有限公司;重庆卫虹医药电子商务有限公司;重庆卫虹医药电子商务有限公司;金萃科技有限公司;出售日:2016年10月31日;2016年10月31日;2016年09月30日;2016年09月30日;2016年09月30日;交易价格(万元):13,054.14;131.86;69.3;0.7;1,906.03;本期初起至出售日该股权为上市公司贡献的净利润(万元):-967.41;-967.41;67.6;67.6;-21.95;出售对公司的影响:实现投资收益6,363.72万元;实现投资收益64.28万元;实现投资收益663.3万元;实现投资收益6.7万元;实现投资收益2024.33万元;股权出售为上市公司贡献的净利润占净利润总额的比…	110.2999626088	20.0219000265	110.3002296088	20.0216390265	康健	化纤、服装及房地产、投资业务等。	898822204	大健康服务产业,包括医药电子交易及电子商务业务、医疗福利管理业务及海虹新健康业务。	IR@searainbow.com		WWW.SEARAINBOW.COM	CNE000000255
101480	000503	海虹控股	2017-12-31	海虹企业(控股)股份有限公司	互联网和相关服务	I64	海南省海口市文华路18号君华海逸大酒店(原文华大酒店)七层	海南省海口市文华路18号君华海逸大酒店(原文华大酒店)七层	1991-09-26	1992-11-30	海南省	海口市	570105	肖琴	010-64424355	0898-68510496	IR@SEARAINBOW.COM	刘雯雯	914600002012808546	出售重大股权情况:交易对方:王忠勇;王忠勇;被出售股权:广东海虹药通电子商务有限公司;海虹医药电子交易中心有限公司;出售日:2017年12月26日;2017年12月08日;交易价格(万元):16,806.35;0.0001;本期初起至出售日该股权为上市公司贡献的净利润(万元):-211.09;-6,826.54;出售对公司的影响:剥离药品及医疗器械招标代理业务,集中资源加速公司业务重心转型;剥离药品及医疗器械招标代理业务,集中资源加速公司业务转型;股权出售为上市公司贡献的净利润占净利润总额的比例:59,540.41%;22,777.92%;股权出售定价原则:评估价格及合同定价;评估价格及合同定价;是否为关联交易:否;否;与交易对方的关联关系:无;无;所涉及的股权是否已全部过户:是;是;是否按计划如期实施,如未按计划实施,应当说明原因及公司已采取的措施:是;是;披露日期:2017年11月1…	110.2999626088	20.0219000265	110.3002296088	20.0216390265	康健	化纤、服装及房地产、投资业务等。	898822204	主要产品和服务为健康保障服务业务,包括医保基金精细化综合管理、商业健康保险第三方服务(TPA)、医药福利管理(PBM)、健康医疗大数据、医疗人工智能等业务。	IR@searainbow.com		WWW.SEARAINBOW.COM	CNE000000255
102274	000538	云南白药	2015-12-31	云南白药集团股份有限公司	医药制造业	C27	云南省昆明市呈贡区云南白药街3686号	云南省昆明市呈贡区云南白药街3686号	1993-11-30	1993-12-15	云南省	昆明市	650500	吴伟	0871-66324159	0871-66324169	wuwei@yunnanbaiyao.com.cn	赵雁	9153000021652214XX	报告期内公司无收购及出售资产、吸收合并事项	102.8329233952	24.8270789923	102.8328103952	24.8270409923	王明辉	制造和销售以白药为主的各类药品。	1041399718	中药资源、中西药原料/制剂、个人护理产品、原生药 材、商业流通等，产品以云南白药系列、天然药物系列及健康护理系列为主	ynby@yunnanbaiyao.com.cn		www.yunnanbaiyao.com.cn	CNE0000008X7
102274	000538	云南白药	2016-12-31	云南白药集团股份有限公司	医药制造业	C27	云南省昆明市呈贡区云南白药街3686号	云南省昆明市呈贡区云南白药街3686号	1993-11-30	1993-12-15	云南省	昆明市	650500	吴伟	0871-66324159	0871-66324169	wuwei@yunnanbaiyao.com.cn	赵雁	9153000021652214XX	报告期内公司无收购及出售资产、吸收合并事项	102.8329233952	24.8270789923	102.8328103952	24.8270409923	王明辉	制造和销售以白药为主的各类药品。	1041399718	化学原料药、化学药制剂、中成药、中药材、生物制品、医疗器械、保健食品、食品、饮料、特种劳保防护用品、非家用纺织成品、日化用品、化妆品、户外用品的研制、生产及销售;橡胶膏剂、贴膏剂、消毒产品、电子和数码产品的销售;信息技术、科技及经济技术咨询服务;货物进出口;物业经营管理(凭资质证开展经营活动)。(依法须经批准的项目,经相关部门批准后方可开展经营活动)	ynby@yunnanbaiyao.com.cn		www.yunnanbaiyao.com.cn	CNE0000008X7
102274	000538	云南白药	2017-12-31	云南白药集团股份有限公司	医药制造业	C27	云南省昆明市呈贡区云南白药街3686号	云南省昆明市呈贡区云南白药街3686号	1993-11-30	1993-12-15	云南省	昆明市	650500	吴伟	0871-66324159	0871-66324169	wuwei@yunnanbaiyao.com.cn	赵雁	9153000021652214XX	报告期内公司无收购及出售资产、吸收合并事项	102.8329233952	24.8270789923	102.8328103952	24.8270409923	王明辉	制造和销售以白药为主的各类药品。	1041399718	化学原料药、化学药制剂、中成药、中药材、生物制品、医疗器械、保健食品、食品、饮料、特种劳保防护用品、非家用纺织成品、日化用品、化妆品、户外用品的研制、生产及销售;橡胶膏剂、贴膏剂、消毒产品、电子和数码产品的销售;信息技术、科技及经济技术咨询服务;货物进出口;物业经营管理(凭资质证开展经营活动)。(依法须经批准的项目,经相关部门批准后方可开展经营活动)	ynby@yunnanbaiyao.com.cn		www.yunnanbaiyao.com.cn	CNE0000008X7
102274	000538	云南白药	2018-12-31	云南白药集团股份有限公司	医药制造业	C27	云南省昆明市呈贡区云南白药街3686号	云南省昆明市呈贡区云南白药街3686号	1993-11-30	1993-12-15	云南省	昆明市	650500	吴伟	0871-66324159	0871-66324169	wuwei@yunnanbaiyao.com.cn	赵雁	9153000021652214XX	报告期内公司无收购及出售资产、吸收合并事项	102.8329233952	24.8270789923	102.8328103952	24.8270409923	王明辉	制造和销售以白药为主的各类药品。	1041399718	化学原料药、化学药制剂、中成药、中药材、生物制品、医疗器械、保健食品、食品、饮料、特种劳保防护用品、非家用纺织成品、日化用品、化妆品、户外用品的研制、生产及销售;橡胶膏剂、贴膏剂、消毒产品、电子和数码产品的销售;信息技术、科技及经济技术咨询服务;货物进出口;物业经营管理(凭资质证开展经营活动)。(依法须经批准的项目,经相关部门批准后方可开展经营活动)。	ynby@yunnanbaiyao.com.cn		www.yunnanbaiyao.com.cn	CNE0000008X7
101563	000540	中天金融	2015-12-31	中天城投集团股份有限公司	房地产业	K70	贵州省贵阳市观山湖区中天路3号	贵州省贵阳市观山湖区中天路3号201中心	1993-12-30	1994-02-02	贵州省	贵阳市	550081	谭忠游	0851-86988177	0851-86988377	Tan.zhongyou@gmail.com	何要求	91520000214466447K	报告期内公司无收购及出售资产、吸收合并事项	106.6426606312	26.6421814631	106.6427306312	26.6421004631	罗玉平	房地产及相关业务。	4683075099	壹级房地产开发、城市基础设施及配套项目开发、拆迁安置及服务、室内装饰装潢、承包境外工程、国内外实业投资、按国家规定在海外举办各类企业;商业、物资供销(专营、专控、专卖及专项审批的商品除外);高新产品开发、高科技投资;农业、工业、基础设施、能源、交通的投资及管理,投资咨询服务;教育产业投资;文化传媒投资与管理;酒店投资及管理;旅游业投资及管理;城市基础设施及配套项目开发(含壹级土地开发,法律限制的除外);矿产资源的综合开发利用及投资管理;会议展览中心相关基础设施及配套项目开发及经营管理。控股子公司经营范围包括房地产开发、物业管理、矿产资源、金融服务等。	ztct@ztcn.cn		www.ztcn.cn	CNE000000FL2
101563	000540	中天金融	2016-12-31	中天金融集团股份有限公司	房地产业	K70	贵州省贵阳市观山湖区中天路3号	贵州省贵阳市观山湖区中天路3号	1993-12-30	1994-02-02	贵州省	贵阳市	550081	谭忠游	0851-86988177	0851-86988377	tanzhongyou@ztcn.cn	何要求	91520000214466447K	报告期内公司无收购及出售资产、吸收合并事项	106.6426606312	26.6421814631	106.6427306312	26.6421004631	罗玉平	房地产及相关业务。	4696565036	法律、法规、国务院决定规定禁止的不得经营;法律、法规、国务院决定应当许可(审批)的,经审批机关批准后凭许可(审批)文件经营;法律、法规、国务院决定规定无需许可〔审批)的,市场主体自主选择经营。(金融投资;股权投资,实业投资;资产经营;产业基金、产权市场投资与管理;金融服务及研究;金融企业投资及管理、咨询;城市基础及公共设施投资管理;壹级房地产开发。)	ztct@ztcn.cn		www.ztcn.cn	CNE000000FL2
101563	000540	中天金融	2017-12-31	中天金融集团股份有限公司	房地产业	K70	贵州省贵阳市观山湖区中天路3号	贵州省贵阳市观山湖区中天路3号	1993-12-30	1994-02-02	贵州省	贵阳市	550081	谭忠游	0851-86988177	0851-86988377	tanzhongyou@ztcn.cn	何要求	91520000214466447K	报告期内公司无收购及出售资产、吸收合并事项	106.6426606312	26.6421814631	106.6427306312	26.6421004631	罗玉平	房地产及相关业务。	4697664786	法律、法规、国务院决定规定禁止的不得经营;法律、法规、国务院决定应当许可(审批)的,经审批机关批准后凭许可(审批)文件经营;法律、法规、国务院决定规定无需许可〔审批)的,市场主体自主选择经营。(金融投资;股权投资,实业投资;资产经营;产业基金、产权市场投资与管理;金融服务及研究;金融企业投资及管理、咨询;城市基础及公共设施投资管理;壹级房地产开发。)	ztct@ztcn.cn		www.ztfgroup.com	CNE000000FL2
101814	000553	安道麦A	2018-12-31	安道麦股份有限公司	化学原料及化学制品制造业	C26	湖北省荆州市北京东路93号	湖北省荆州市北京东路93号	1992-09-08	1993-12-03	湖北省	荆州市	434001	李忠禧	0716-8208632	0716-8321099	zhongxi.li@adama.com	梁吉勤	91420000706962287Q	报告期内公司无收购及出售资产、吸收合并事项	112.3168455761	30.2588881529	112.296439734	30.2815206948	Chen Lichtenstein	农药的生产与销售。	2446554000	开发、生产、销售农化产品、其他行业的中间材料、食品添加剂、合成芳香剂,并主要销往境外。	sld@agr.chemchina.com	200553	www.adama.com	CNE0000004V0
101816	000555	神州信息	2016-12-31	神州数码信息服务股份有限公司	软件和信息技术服务业	I65	广东省深圳市南山区科发路8号金融服务技术创新基地2栋11B1单元	北京市海淀区西北旺东路10号院东区18号楼神州信息大厦六层	1994-01-08	1994-04-08	广东省	深圳市	100094	王燕	010-61853676	010-62694810	dcits-ir@dcits.com	孙端阳	91440300726198124D	报告期内公司无收购及出售资产、吸收合并事项	113.946744546	22.5437732498	113.946015546	22.5441922498	郭为	金融自助设备及相关应用软件的研发、销售。	963431273	研究、开发金融自助设备及相关应用软件,销售本公司所研发产品并提供售后服务;提供信息技术及相关技术的咨询、开发、技术服务;软件开发、信息系统的集成并提供售后服务;从事信息系统集成配套计算机硬件及零件、网络设备、多媒体产品、电子信息产品及通讯产品、办公自动化设备、仪器仪表、电器及印刷照排设备的批发、进出口及相关业务。	dcits-ir@dcits.com		www.dcits.com	CNE000000FM0
102300	000559	万向钱潮	2015-12-31	万向钱潮股份有限公司	汽车制造业	C36	浙江省杭州市萧山区万向路	浙江省杭州市萧山经济技术开发区万向路	1993-12-25	1994-01-10	浙江省	杭州市	311215	许小建	0571-82832999	0571-82602132	wxqc@wanxiang.com.cn	邓文		报告期内公司无收购及出售资产、吸收合并事项	120.2662637114	30.2007252802	120.2852695202	30.2072023892	管大源	汽车零配件及汽车总成。	2294299545	汽车零部件及相关机电产品的开发、制造和销售。主要产品：等速驱动轴、汽车轮毂单元及传动轴等及其配件。	WXQC@wanxiang.com.cn		www.wxqc.com.cn	CNE000000FB3
102300	000559	万向钱潮	2016-12-31	万向钱潮股份有限公司	汽车制造业	C36	浙江省杭州市萧山区万向路	浙江省杭州市萧山区万向路	1993-12-25	1994-01-10	浙江省	杭州市	311215	邓文	0571-82832999	0571-82602132	dengwen@163.com		91330000142923441E	出售重大股权情况:交易对方:浙江世泰实业有限公司;被出售股权:万向钱潮(桂林)汽车底盘部件有限公司;出售日:2016年05月16日;交易价格(万元):3171.6;本期初起至出售日该股权为上市公司贡献的净利润(万元):-6.56;出售对公司的影响:有利公司集中资源做大做强公司优势主产品,提高公司资源的效率与效益;股权出售为上市公司贡献的净利润占净利润总额的比例:3.80%;股权出售定价原则:资产评估;是否为关联交易:否;与交易对方的关联关系:不适用;涉及的股权是否已全部过户:是;是否按计划如期实施,如未按计划实施,应当说明原因及公司已采取的措施:是;披露日期:2016年05月16日;披露索引:巨潮资讯网公告编号:2016-018	120.2836467614	30.2003358531	120.2852695202	30.2072023892	鲁冠球	汽车零配件及汽车总成。	2294299545	汽车零部件及相关机电产品的开发、制造和销售。主要产品:等速驱动轴、汽车轮毂单元及传动轴等及其配件。	WXQC@wanxiang.com.cn		www.wxqc.com.cn	CNE000000FB3
102300	000559	万向钱潮	2017-12-31	万向钱潮股份有限公司	汽车制造业	C36	浙江省杭州市萧山区万向路	浙江省杭州市萧山区万向路	1993-12-25	1994-01-10	浙江省	杭州市	311215	邓文	0571-82832999	0571-82602132	dengwen@163.com		91330000142923441E	出售重大股权情况:交易对方:十堰市新百强工贸有限公司;被出售股权:十堰巨迪金属管业有限公司;出售日:2017年10月19日;交易价格(万元):960;本期初起至出售日该股权为上市公司贡献的净利润(万元):89.38;出售对公司的影响:本次股权转让符合本公司整体战略发展规划,有利于公司优化资源,集中优势资源进一步提升公司核心竞争力和整体经济效益,有利于公司更加长远和稳健的发展;股权出售为上市公司贡献的净利润占净利润总额的比例:0.0104;股权出售定价原则:市场公允价;是否为关联交易:否;与交易对方的关联关系:不适用;所涉及的股权是否已全部过户:是;是否按计划如期实施,如未按计划实施,应当说明原因及公司已采取的措施:是;披露日期:2017年10月20日;披露索引:巨潮资讯网公告编号:2017-06-5;注:1、十堰巨迪股权转让实际收到9,630,010.02元,其中9,600,000元为股…	120.2836397614	30.2003018531	120.2852695202	30.2072023892	管大源	汽车零配件及汽车总成。	2753159454	汽车零部件及相关机电产品的开发、制造和销售。主要产品:等速驱动轴、汽车轮毂单元及传动轴等及其配件。	WXQC@wanxiang.com.cn		www.wxqc.com.cn	CNE000000FB3
101591	000568	泸州老窖	2015-12-31	泸州老窖股份有限公司	酒、饮料和精制茶制造业	C15	四川省泸州市国窖广场	四川省泸州市泸州老窖营销网络指挥中心	1993-09-20	1994-05-09	四川省	泸州市	646000	王洪波	0830-2398826	0830-2398864	dsb@lzlj.com	王川		报告期内公司无收购及出售资产、吸收合并事项	105.4224208033	28.8686923549	105.4541209901	28.884588689	刘淼	经营和销售泸州老窖系列类酒。	1402252476	泸州老窖系列酒的生产、销售。 产品主要有：国窖1573系列酒、百年泸州老窖窖龄系列酒、泸州老窖特曲、头曲、二曲等系列酒。	lzlj@lzlj.com		www.lzlj.com	CNE000000GF2
101591	000568	泸州老窖	2016-12-31	泸州老窖股份有限公司	酒、饮料和精制茶制造业	C15	四川省泸州市国窖广场	四川省泸州市南光路泸州老窖营销网络指挥中心	1993-09-20	1994-05-09	四川省	泸州市	646000	王洪波	0830-2398826	0830-2398864	dsb@lzlj.com	王川	91510500204706718H	报告期内公司无收购及出售资产、吸收合并事项	105.4546229901	28.884560689	105.4541209901	28.884588689	刘淼	经营和销售泸州老窖系列类酒。	1402252476	泸州老窖系列酒的生产、销售。公司产品主要有:国窖1573系列酒、百年泸州老窖窖龄系列酒、泸州老窖特曲、头曲、二曲等系列酒。	lzlj@lzlj.com		www.lzlj.com	CNE000000GF2
101591	000568	泸州老窖	2017-12-31	泸州老窖股份有限公司	酒、饮料和精制茶制造业	C15	四川省泸州市国窖广场	四川省泸州市南光路泸州老窖营销网络指挥中心	1993-09-20	1994-05-09	四川省	泸州市	646000	王洪波	0830-2398826	0830-2398864	dsb@lzlj.com	王川	91510500204706718H	报告期内公司无收购及出售资产、吸收合并事项	105.4546229901	28.884560689	105.4541209901	28.884588689	刘淼	经营和销售泸州老窖系列类酒。	1464752476	“国窖1573”、“泸州老窖”等系列白酒的研发、生产和销售。公司产品主要有:国窖1573系列酒、百年泸州老窖窖龄系列酒、泸州老窖特曲、头曲、二曲等系列酒。	lzlj@lzlj.com		www.lzlj.com	CNE000000GF2
101591	000568	泸州老窖	2018-12-31	泸州老窖股份有限公司	酒、饮料和精制茶制造业	C15	四川省泸州市国窖广场	四川省泸州市南光路泸州老窖营销网络指挥中心	1993-09-20	1994-05-09	四川省	泸州市	646000	王洪波	0830-2398826	0830-2398864	dsb@lzlj.com	王川	91510500204706718H	报告期内公司无收购及出售资产、吸收合并事项	105.4304268333	28.8926211758	105.4541209901	28.884588689	刘淼	经营和销售泸州老窖系列类酒。	1464752476	“国窖1573”、“泸州老窖”等系列白酒的研发、生产和销售。公司产品主要有:国窖1573系列酒、百年泸州老窖窖龄系列酒、泸州老窖特曲、头曲、二曲等系列酒。	lzlj@lzlj.com		www.lzlj.com	CNE000000GF2
101751	000623	吉林敖东	2015-12-31	吉林敖东药业集团股份有限公司	医药制造业	C27	吉林省敦化市敖东大街2158号	吉林省敦化市敖东大街2158号	1993-03-20	1996-10-28	吉林省	敦化市	133700	陈永丰	0433-6238973	0433-6238973	000623@jlaod.com	王振宇	91222400243805786K	报告期内公司无收购及出售资产、吸收合并事项	128.2283714819	43.3602806925	128.2283434819	43.3610116925	李秀林	制药业为主导产业，集养殖、种植、房地产开发、商业、机械修理、仓储、饮食服务业、运输等多业经营	894438433	种植养殖、商业（国家专项控制、专营除外）；机械修理、仓储；本企业生产、科研所需的原辅材料、机械设备、仪器仪表、零配件（国家实行核定公司经营的12种进口商品除外）进口；医药工业、医药商业、医药科研与开发（凭相关批准文件开展经营活动）。	000623@jlaod.com		www.jlaod.com	CNE000000719
101751	000623	吉林敖东	2016-12-31	吉林敖东药业集团股份有限公司	医药制造业	C27	吉林省敦化市敖东大街2158号	吉林省敦化市敖东大街2158号	1993-03-20	1996-10-28	吉林省	敦化市	133700	陈永丰	0433-6238973	0433-6238973	000623@jlaod.com	王振宇	91222400243805786K	报告期内公司无收购及出售资产、吸收合并事项	128.2283714819	43.3602806925	128.2283434819	43.3610116925	李秀林	制药业为主导产业，集养殖、种植、房地产开发、商业、机械修理、仓储、饮食服务业、运输等多业经营	894438433	种植养殖、商业(国家专项控制、专营除外);机械修理、仓储;本企业生产、科研所需的原辅材料、机械设备、仪器仪表、零配件(国家实行核定公司经营的12种进口商品除外)进口;医药工业、医药商业、医药科研与开发(凭相关批准文件开展经营活动)	000623@jlaod.com		www.jlaod.com	CNE000000719
101751	000623	吉林敖东	2017-12-31	吉林敖东药业集团股份有限公司	医药制造业	C27	吉林省敦化市敖东大街2158号	吉林省敦化市敖东大街2158号	1993-03-20	1996-10-28	吉林省	敦化市	133700	王振宇	0433-6238973	0433-6238973	000623@jlaod.com	张海涛	91222400243805786K	报告期内公司无收购及出售资产、吸收合并事项	128.2283714819	43.3602806925	128.2283434819	43.3610116925	李秀林	制药业为主导产业，集养殖、种植、房地产开发、商业、机械修理、仓储、饮食服务业、运输等多业经营	1162769962	种植养殖、商业(国家专项控制、专营除外);机械修理、仓储;本企业生产、科研所需的原辅材料、机械设备、仪器仪表、零配件(国家实行核定公司经营的12种进口商品除外)进口;医药工业、医药商业、医药科研与开发;汽车租赁服务;自有房地产经营活动。(依法须经批准的项目,经相关部门批准后方可开展经营活动)。	000623@jlaod.com		www.jlaod.com	CNE000000719
101752	000625	长安汽车	2015-12-31	重庆长安汽车股份有限公司	汽车制造业	C36	重庆市江北区建新东路260号	重庆市江北区建新东路260号	1996-10-31	1996-11-08	重庆市	重庆市	400023	王锟(代);黎军	023-67594008	023-67866055	cazqc@changan.com.cn		9150000020286320X6	报告期内公司无收购及出售资产、吸收合并事项	106.5487211649	29.5732441493	106.5475961649	29.5736801493	张宝林	主要从事汽车(含轿车)、汽车发动机系列产品、配套零部件的制造、销售等业务。	4662886108	汽车(含轿车)、汽车发动机系列产品、配套零部件的制造、销售等业务。	cazqc@changan.com.cn	200625	www.changan.com.cn	CNE000000R36
101752	000625	长安汽车	2016-12-31	重庆长安汽车股份有限公司	汽车制造业	C36	重庆市江北区建新东路260号	重庆市江北区建新东路260号	1996-10-31	1996-11-08	重庆市	重庆市	400023	王锟(代);黎军	023-67594008	023-67866055	cazqc@changan.com.cn		9150000020286320X6	报告期内公司无收购及出售资产、吸收合并事项	106.5487211649	29.5732441493	106.5475961649	29.5736801493	徐留平	主要从事汽车(含轿车)、汽车发动机系列产品、配套零部件的制造、销售等业务。	4802648511	汽车(含轿车)、汽车发动机系列产品、配套零部件的制造、销售等业务。	cazqc@changan.com.cn	200625	www.changan.com.cn	CNE000000R36
101752	000625	长安汽车	2017-12-31	重庆长安汽车股份有限公司	汽车制造业	C36	重庆市江北区建新东路260号	重庆市江北区建新东路260号	1996-10-31	1996-11-08	重庆市	重庆市	400023	黎军	023-67594008	023-67866055	cazqc@changan.com.cn		9150000020286320X6	报告期内公司无收购及出售资产、吸收合并事项	106.5487211649	29.5732441493	106.5475961649	29.5736801493	张宝林	主要从事汽车(含轿车)、汽车发动机系列产品、配套零部件的制造、销售等业务。	4802648511	汽车(含轿车)、汽车发动机系列产品、配套零部件的制造、销售等业务。	cazqc@changan.com.cn	200625	www.changan.com.cn	CNE000000R36
101752	000625	长安汽车	2018-12-31	重庆长安汽车股份有限公司	汽车制造业	C36	重庆市江北区建新东路260号	重庆市江北区建新东路260号	1996-10-31	1996-11-08	重庆市	重庆市	400023	黎军	023-67594008	023-67866055	cazqc@changan.com.cn		9150000020286320X6	报告期内公司无收购及出售资产、吸收合并事项	106.5487211649	29.5732441493	106.5475961649	29.5736801493	张宝林	主要从事汽车(含轿车)、汽车发动机系列产品、配套零部件的制造、销售等业务。	4802648511	涵盖整车(乘用车、商用车)的研发、制造和销售以及发动机的研发、生产,并整合优势资源积极发展出行服务、新零售等领域,进行多维度的产业布局	cazqc@changan.com.cn	200625	www.changan.com.cn	CNE000000R36
102279	000627	天茂集团	2016-12-31	天茂实业集团股份有限公司	保险业	J68	湖北省荆门市杨湾路132号	湖北省荆门市杨湾路132号	1993-12-31	1996-11-12	湖北省	荆门市	448000	龙飞	0724-2223218	0724-2217652	tmjt@biocause.net	李梦莲	914200002717500148	报告期内公司无收购及出售资产、吸收合并事项	112.2415194426	31.0206997536	112.2410804426	31.0205057536	刘益谦	化工产品的生产、销售。	4259194566	人寿保险、健康保险、意外伤害保险等各类人身保险业务、房地产开发与经营、物业管理、代理销售保险、基金销售等。化工产品(不含危险化学品、需经审批的项目持有效许可证经营)的生产、销售;甲醇、二甲醚、丙烷、丙烯、异丁基苯、石油醚、异丁烷、甲基叔丁基醚、混合芳烃、工业用液化石油气(票面)批发(有效期至2018年6月3日);五金交电、建筑材料销售;经营本企业自产产品及技术的出口业务;经营本企业生产所需的原辅材料、仪器仪表、机械设备、零配件及技术的进口业务(国家限定公司经营和国家禁止进出口的商品及技术除外);经营进料加工和"三来一补"业务。	tmjt@biocause.net		www.biocause.com	CNE000000F48
102279	000627	天茂集团	2017-12-31	天茂实业集团股份有限公司	保险业	J68	湖北省荆门市杨湾路132号	湖北省荆门市杨湾路132号	1993-12-31	1996-11-12	湖北省	荆门市	448000	龙飞	0724-2223218	0724-2217652	tmjt@biocause.net	李梦莲	914200002717500148	报告期内公司无收购及出售资产、吸收合并事项	112.2415194426	31.0206997536	112.2410804426	31.0205057536	刘益谦	化工产品的生产、销售。	4940629165	人寿保险、健康保险、意外伤害保险等各类人身保险业务、房地产开发与经营、物业管理、代理销售保险、基金销售等。化工产品(不含危险化学品、需经审批的项目持有效许可证经营)的生产、销售;甲醇、二甲醚、丙烷、丙烯、异丁基苯、石油醚、异丁烷、甲基叔丁基醚、混合芳烃、工业用液化石油气(票面)批发(有效期至2018年6月3日);五金交电、建筑材料销售;经营本企业自产产品及技术的出口业务;经营本企业生产所需的原辅材料、仪器仪表、机械设备、零配件及技术的进口业务(国家限定公司经营和国家禁止进出口的商品及技术除外);经营进料加工和“三来一补”业务。	tmjt@biocause.net		www.biocause.com	CNE000000F48
102279	000627	天茂集团	2018-12-31	天茂实业集团股份有限公司	保险业	J68	湖北省荆门市杨湾路132号	湖北省荆门市杨湾路132号	1993-12-31	1996-11-12	湖北省	荆门市	448000	龙飞	0724-2223218	0724-2217652	tmjt@biocause.net	李梦莲	914200002717500148	出售重大股权情况:交易对方:上海陇傅实业有限公司;被出售股权:荆门和程贸易有限公司100%股权;荆门天励投资有限公司100%股权;荆门天睿投资有限公司100%股权;紫光创新投资有限公司8%股权;出售日:2018年05月18日;交易价格(万元):50,965.81;本期初起至出售日该股权为上市公司贡献的净利润(万元):16,675.62元);出售对公司的影响:无影响;股权出售为上市公司贡献的净利润占净利润总额的比例:12.57%的比例;股权出售定价原则:以评估值和债权为依据;是否为关联交易:否;与交易对方的关联关系:无关联关系;所涉及的股权是否已全部过户:是;计划如期实施,如未按计划实施,应当说明原因及公司已采取的措施:是取的措施;披露日期:2018年02月10日;披露索引:《中国证券报》《证券时报》和巨潮资讯网	112.2415194426	31.0206997536	112.2410804426	31.0205057536	刘益谦	化工产品的生产、销售。	4940629165	人寿保险、健康保险、意外伤害保险等各类人身保险业务、房地产开发与经营、物业管理、代理销售保险、基金销售等。化工产品(不含危险化学品、需经审批的项目持有效许可证经营)的生产、销售;甲醇、二甲醚、丙烷、丙烯、异丁基苯、石油醚、异丁烷、甲基叔丁基醚、混合芳烃、工业用液化石油气(票面)批发;五金交电、建筑材料销售;经营本企业自产产品及技术的出口业务;经营本企业生产所需的原辅材料、仪器仪表、机械设备、零配件及技术的进口业务(国家限定公司经营和国家禁止进出口的商品及技术除外);经营进料加工和“三来一补”业务。	tmjt@biocause.net		www.biocause.com	CNE000000F48
102281	000629	攀钢钒钛	2018-12-31	攀钢集团钒钛资源股份有限公司	有色金属冶炼及压延加工业	C32	四川省攀枝花市东区弄弄坪	四川省攀枝花市东区钢城大道西段21号攀钢文化广场	1993-03-27	1996-11-15	四川省	攀枝花市	617067	罗玉惠	0812-3385366	0812-3385285	psv@pzhsteel.com.cn	石灏南	91510400204360956E	报告期内公司无收购及出售资产、吸收合并事项	101.6930524736	26.55185729	101.643904294	26.5956539584	段向东	以钒钛产品生产与销售、钒钛延伸产品的研发和应用为主。	8589746202	钒钛综合利用	psv@pzhsteel.com.cn		www.pgvt.cn	CNE0000007H2
102283	000630	铜陵有色	2015-12-31	铜陵有色金属集团股份有限公司	有色金属冶炼及压延加工业	C32	安徽省铜陵市长江西路	安徽省铜陵市长江西路有色大院西楼	1992-08-20	1996-11-20	安徽省	铜陵市	244001	吴和平	0562-5860159	0562-5861195	tlyswhp@126.com	何燕		报告期内公司无收购及出售资产、吸收合并事项	117.8048426001	30.9354789283	117.8097969369	30.9302615462	杨军	铜、铁、硫金矿采选。	9560643685	铜、铁采选，压缩、液化气体生产，硫酸生产，有色金属冶炼及压延加工，金、银、稀有贵金属冶炼及压延加工，铁球团、硫酸铜、电子产品生产、加工、销售，电气机械和器材、普通机械、电缆盘制造，废旧金属回收购、加工，进 出口业务，矿产品、钢材、化工产品销售，信息技术服务，有线电视服务产品销售，广告业 务，固体矿产勘查（丙级），设备设施维修、安装、改造及调试，机械制作加工，铁精砂购销（依法须经批准的项目，经相关部门批准后方可开 展经营活动）	tlys@126.com		www.tlys.cn	CNE000000529
102283	000630	铜陵有色	2016-12-31	铜陵有色金属集团股份有限公司	有色金属冶炼及压延加工业	C32	安徽省铜陵市长江西路	安徽省铜陵市长江西路有色大院西楼	1992-08-20	1996-11-20	安徽省	铜陵市	244001	吴和平	0562-5860159	0562-5861195	tlyswhp@126.com		913407001489736421	报告期内公司无收购及出售资产、吸收合并事项	117.8048426001	30.9354789283	117.8097969369	30.9302615462	杨军	铜、铁、硫金矿采选。	10526533308	铜、铁采选,硫铁矿、金矿采选(限铜陵有色股份天马山黄金矿业公司经营),压缩、液化气体生产,硫酸生产,生活饮用水制水、供水(限动力厂经营),有色金属冶炼及压延加工,金、银、稀有贵金属冶炼及压延加工,铁球团、硫酸铜、电子产品生产、加工、销售,电气机械和器材、普通机械、电缆盘制造,废旧金属回收购、加工,进出口业务,矿产品、钢材、化工产品销售,信息技术服务,有线电视服务产品销售,广告业务,固体矿产勘查(丙级),设备设施维修、安装、改造及调试,机械制作加工,铁精砂购销,危险化学品生产(限分公司经营)。(依法须经批准的项目,经相关部门批准后方可开展经营活动)	tlys@126.com		www.tlys.cn	CNE000000529
102283	000630	铜陵有色	2017-12-31	铜陵有色金属集团股份有限公司	有色金属冶炼及压延加工业	C32	安徽省铜陵市长江西路	安徽省铜陵市长江西路有色大院西楼	1992-08-20	1996-11-20	安徽省	铜陵市	244001	吴和平	0562-5860159	0562-5861195	tlyswhp@126.com	陈茁	913407001489736421	报告期内公司无收购及出售资产、吸收合并事项	117.8048426001	30.9354789283	117.8097969369	30.9302615462	杨军	铜、铁、硫金矿采选。	10526533308	铜、铁采选,硫铁矿、金矿采选(限铜陵有色股份天马山黄金矿业公司经营),压缩、液化气体生产,硫酸生产,生活饮用水制水、供水(限动力厂经营),有色金属冶炼及压延加工,金、银、稀有贵金属冶炼及压延加工,铁球团、硫酸铜、电子产品生产、加工、销售,电气机械和器材、普通机械、电缆盘制造,废旧金属回收购、加工,进出口业务,矿产品、钢材、化工产品销售,信息技术服务,有线电视服务产品销售,广告业务,固体矿产勘查(丙级),设备设施维修、安装、改造及调试,机械制作加工,铁精砂购销,危险化学品生产(限分公司经营)。(依法须经批准的项目,经相关部门批准后方可开展经营活动)	tlys@126.com		www.tlys.cn	CNE000000529
102283	000630	铜陵有色	2018-12-31	铜陵有色金属集团股份有限公司	有色金属冶炼及压延加工业	C32	安徽省铜陵市长江西路	安徽省铜陵市长江西路有色大院西楼	1992-08-20	1996-11-20	安徽省	铜陵市	244001	吴和平	0562-5860159	0562-5861195	tlyswhp@126.com	陈茁	913407001489736421	报告期内公司无收购及出售资产、吸收合并事项	117.8048426001	30.9354789283	117.8097969369	30.9302615462	杨军	铜、铁、硫金矿采选。	10526533308	铜、铁采选,硫铁矿、金矿采选(限铜陵有色股份天马山黄金矿业公司经营),压缩、液化气体生产,硫酸生产,生活饮用水制水、供水及热电联产蒸汽与电的生产和销售以及副产品的销售(限动力厂经营),有色金属冶炼及压延加工,金、银、稀有贵金属冶炼及压延加工,铁球团、硫酸铜、电子产品生产、加工、销售,电气机械和器材、普通机械、电缆盘制造,废旧金属回收购、加工,进出口业务,矿产品、钢材、化工产品销售,信息技术服务,有线电视服务产品销售,广告业务,固体矿产勘查(丙级),设备设施维修、安装、改造及调试,机械制作加工,铁精砂购销,危险化学品生产(限分公司经营)。(依法须经批准的项目,经相关部门批准后方可开展经营活动)	tlys@126.com		www.tlys.cn	CNE000000529
101713	000651	格力电器	2015-12-31	珠海格力电器股份有限公司	电气机械及器材制造业	C38	广东省珠海市前山金鸡西路	广东省珠海市前山金鸡西路	1989-12-13	1996-11-18	广东省	珠海市	519070	望靖东	0756-8669232	0756-8622581	gree0651@cn.gree.com	杨永兴		报告期内公司无收购及出售资产、吸收合并事项	113.499618645	22.2351621817	113.4927518715	22.234414088	董明珠	空调、干衣机等家用电器。	6015730878	货物、技术的进出口（法律、行政法规禁止的项目除外；法律、 行政法规限制的项目须取得许可后方可经营）；制造、销售：泵、阀门、压缩机及类似 机械，风机、包装设备等通用设备，电机，输配电及控制设备，电线、电缆、光缆及 电工器材，家用电力器具；批发：机械设备、五金交电及电子产品；零售：家用电器 及电子产品。 主要产品或服务为生产销售空调器及其配件和小家电及其配件。	gree@gree.com.cn		www.gree.com.cn	CNE0000001D4
101713	000651	格力电器	2016-12-31	珠海格力电器股份有限公司	电气机械及器材制造业	C38	广东省珠海市前山金鸡西路	广东省珠海市前山金鸡西路	1989-12-13	1996-11-18	广东省	珠海市	519070	望靖东	0756-8669232	0756-8622581	gree0651@cn.gree.com		91440400192548256N	报告期内公司无收购及出售资产、吸收合并事项	113.499618645	22.2351621817	113.4927518715	22.234414088	董明珠	空调、干衣机等家用电器。	6015730878	货物、技术的进出口(法律、行政法规禁止的项目除外;法律、行政法规限制的项目须取得许可后方可经营);制造、销售:泵、阀门、压缩机及类似机械,风机、包装设备等通用设备,电机,输配电及控制设备,电线、电缆、光缆及电工器材,家用电力器具;批发:机械设备、五金交电及电子产品;零售:家用电器及电子产品。公司主要经营产品:公司属家电行业,主要产品或服务为生产销售空调器及其配件和生活电器及其配件。	gree@gree.com.cn		www.gree.com.cn	CNE0000001D4
101713	000651	格力电器	2017-12-31	珠海格力电器股份有限公司	电气机械及器材制造业	C38	广东省珠海市前山金鸡西路	广东省珠海市前山金鸡西路	1989-12-13	1996-11-18	广东省	珠海市	519070	望靖东	0756-8669232	0756-8622581	gree0651@cn.gree.com		91440400192548256N	报告期内公司无收购及出售资产、吸收合并事项	113.499618645	22.2351621817	113.4927518715	22.234414088	董明珠	空调、干衣机等家用电器。	6015730878	空调器及其配件和生活电器及其配件的生产及销售。	gree@gree.com.cn		www.gree.com.cn	CNE0000001D4
101713	000651	格力电器	2018-12-31	珠海格力电器股份有限公司	电气机械及器材制造业	C38	广东省珠海市前山金鸡西路	广东省珠海市前山金鸡西路	1989-12-13	1996-11-18	广东省	珠海市	519070	望靖东	0756-8669232	0756-8614998	gree0651@cn.gree.com	章周虎;严章祥	91440400192548256N	报告期内公司无收购及出售资产、吸收合并事项	113.499618645	22.2351621817	113.4927518715	22.234414088	董明珠	空调、干衣机等家用电器。	6015730878	空调器及其配件和生活电器及其配件的生产及销售。	gree@gree.com.cn		www.gree.com.cn	CNE0000001D4
102308	000661	长春高新	2018-12-31	长春高新技术产业(集团)股份有限公司	医药制造业	C27	吉林省长春市同志街2400号火炬大厦5层	吉林省长春市同志街2400号火炬大厦5层	1993-06-10	1996-12-18	吉林省	长春市	130021	张德申	0431-85666367	0431-85675390	zds000661@163.com	刘思;李季	91220101243899305A	报告期内公司无收购及出售资产、吸收合并事项	125.3184520537	43.8677083668	125.3184420537	43.8678673668	马骥	以生物制药、中成药生产及销售、房地产开发为主导产业，辅以开发区基础设施建设、物业管理等。	170112265	高新技术产品的开发、生产、销售及服务基础设施的开发建设;物业管理;高新成果转让及中介服务;商业供销业(国家有专项限制经营的商品除外);餐饮、娱乐、旅馆(办时需许可);培训;新药开发、技术转让、咨询服务;集中供热;产业投资(医药产业)(以上各项仅限公司、子公司持证经营)。绿化景观工程设计施工及维护、企业营销策划、广告策划、社会经济信息咨询房地产中介服务、房屋销售代理(仅限分支机构持证经营;应经专项审批的项自未获得批准之前不得经营。	cchn@public.cc.jl.cn		www.cchn.com.cn	CNE0000007J8
101619	000671	阳光城	2016-12-31	阳光城集团股份有限公司	房地产业	K70	福建省福州市经济技术开发区星发路8号	上海市浦东新区洲海路999号森兰国际大厦A栋15层	1991-08-02	1996-12-18	福建省	福州市	200137	罗瑞华	0211-80328088	021-80328600	sunshine000671@163.com	张龙;江信建	91350000158164371W	报告期内公司无收购及出售资产、吸收合并事项	119.4585389295	25.9906565575	119.4576699295	25.9910185575	林腾蛟	基础设施、电子产品及轻工业产品。	4050073315	对外贸易(不含国家禁止、限制的商品和技术);电力生产,代购代销电力产品和设备;电子通信技术开发,生物技术产品开发,农业及综合技术开发;基础设施开发、房地产开发;家用电器及电子产品,机械电子设备、五金交电、建筑材料,百货,针纺织品、化工产品(不含危险化学品及易制毒化学品)、重油(不含成品油)、润滑油、燃料油(不含成品油)、金属材料的批发、零售;化肥的销售;对医疗健康行业的投资及投资管理;批发兼零售预包装食品;企业管理咨询服务。	000671@yango.com.cn		www.yango.com.cn	CNE000000206
101619	000671	阳光城	2017-12-31	阳光城集团股份有限公司	房地产业	K70	福建省福州市经济技术开发区星发路8号	上海市北外滩杨树浦路1058号阳光控股大厦18层	1991-08-02	1996-12-18	福建省	福州市	200082	罗瑞华	021-80328088	021-80328600	sunshine000671@163.com	张龙;江信建	91350000158164371W	出售重大股权情况:交易对方:当代置业(香港6);被出售股权:阳光城粤港有限公司51%股权;出售日:2017年9月;交易价格(万元):205,856.48;出售对公司的影响:对业务连续性、管理层稳定性没有产生影响;股权出售定价原则:经双方协商确定;是否为关联交易:否;与交易对方的关联关系:无;所涉及的股权是否已全部过户:是;是否按计划如期实施,如未按计划实施,应当说明原因及公司已采取的措施:是;披露日期:2017年9月16日;披露索引:公告名称:关于转让阳光城粤港有限公司51%股权的公告,公告号:2017-256,披露网站:巨潮资讯网公司;出售股权的交易对价超过公司最近一期经审计合并报表归属母公司净资产10%以上的交易视为出售重大股权情况。	121.5302017342	31.2521813855	119.4576699295	25.9910185575	林腾蛟	基础设施、电子产品及轻工业产品。	4050073315	对外贸易(不含国家禁止、限制的商品和技术);电力生产,代购代销电力产品和设备;电子通信技术开发,生物技术产品开发,农业及综合技术开发;基础设施开发、房地产开发;家用电器及电子产品,机械电子设备、五金交电、建筑材料,百货,针纺织品、化工产品(不含危险化学品及易制毒化学品)、重油(不含成品油)、润滑油、燃料油(不含成品油)、金属材料的批发、零售;化肥的销售;对医疗健康行业的投资及投资管理;批发兼零售预包装食品;企业管理咨询服务。	000671@yango.com.cn		www.yango.com.cn	CNE000000206
101619	000671	阳光城	2018-12-31	阳光城集团股份有限公司	房地产业	K70	福建省福州市经济技术开发区星发路8号	上海市北外滩杨树浦路1058号阳光控股大厦18层	1991-08-02	1996-12-18	福建省	福州市	200082	徐慜婧	021-80328709	021-80328600	sunshine000671@163.com	国晓彤;江信建	91350000158164371W	报告期内公司无收购及出售资产、吸收合并事项	121.5302017342	31.2521813855	119.4576699295	25.9910185575	林腾蛟	基础设施、电子产品及轻工业产品。	4050073315	对外贸易(不含国家禁止、限制的商品和技术);电力生产,代购代销电力产品和设备;电子通信技术开发,生物技术产品开发,农业及综合技术开发;基础设施开发、房地产开发;家用电器及电子产品,机械电子设备、五金交电、建筑材料,百货,针纺织品、化工产品(不含危险化学品及易制毒化学品)、重油(不含成品油)、润滑油、燃料油(不含成品油)、金属材料的批发、零售;化肥的销售;对医疗健康行业的投资及投资管理;批发兼零售预包装食品;企业管理咨询服务。	000671@yango.com.cn		www.yango.com.cn	CNE000000206
102333	000686	东北证券	2015-12-31	东北证券股份有限公司	资本市场服务	J67	吉林省长春市自由大路1138号	吉林省长春市自由大路1138号	1993-08-20	1997-02-27	吉林省	长春市	130021	徐冰	0431-85096806	0431-85096816	xub@nesc.cn	刘洋		报告期内公司无收购及出售资产、吸收合并事项	125.3224850737	43.8638080248	125.3224170737	43.8638750248	杨树财	证券（含境内上市外资股）的代理买卖；代理证券的还本付息、分红派息；证券代保管、鉴证；代理登记开户；证券的自营买卖；证券的承销（含主承销）；客户资产管理；证券投资咨询（含财务顾问）；中国证监会批准的其他业务。	1957166032	证券经纪；证券投资咨询；与证券交易、证券投资活动有关的财务顾问；证 券承销与保荐；证券自营；证券资产管理；融资融券；证券投资基金代销；为期货公司提供中间 介绍业务；代销金融产品（证券许可证有效期至2017 年6 月19 日）。	000686@nesc.cn		www.nesc.cn	CNE0000004H9
102333	000686	东北证券	2016-12-31	东北证券股份有限公司	资本市场服务	J67	吉林省长春市生态大街6666号	吉林省长春市生态大街6666号	1993-08-20	1997-02-27	吉林省	长春市	130119	徐冰	0431-85096806	0431-85096816	xub@nesc.cn	刘洋	91220000664275090B	报告期内公司无收购及出售资产、吸收合并事项	125.3806180486	43.7757645523	125.3806130486	43.7757645523	李福春	证券（含境内上市外资股）的代理买卖；代理证券的还本付息、分红派息；证券代保管、鉴证；代理登记开户；证券的自营买卖；证券的承销（含主承销）；客户资产管理；证券投资咨询（含财务顾问）；中国证监会批准的其他业务。	2340452915	证券经纪;证券投资咨询;与证券交易、证券投资活动有关的财务顾问;证券承销与保荐;证券自营;融资融券;证券投资基金代销;代销金融产品。	000686@nesc.cn		www.nesc.cn	CNE0000004H9
101511	000703	恒逸石化	2018-12-31	恒逸石化股份有限公司	化学纤维制造业	C28	广西壮族自治区北海市北海大道西16号海富大厦第七层G号	浙江省杭州市萧山区市心北路260号恒逸·南岸明珠3栋	1990-05-08	1997-03-28	广西壮族自治区	北海市	311215	郑新刚	0571-83871991	0571-83871992	hysh@hengyi.com	邓小龙;陈莎莎	9145050019822966X4	报告期内公司无收购及出售资产、吸收合并事项	120.2695432414	30.2076703553	109.1042291744	21.4643112662	方贤水	生产和销售精对苯二甲酸（PTA）和聚酯纤维（涤纶）等相关产品。	2627957359	化学纤维、化学原料(不含危险品)的生产、加工与销售;进出口业务(除国家法律、法规禁止和限制的项目)。公司主要产品是精对苯二甲酸(PTA)、聚酯切片、聚酯瓶片、涤纶预取向丝(POY)、涤纶全拉伸丝(FDY)、涤纶拉伸变形丝(DTY)、涤纶短纤。	hysh@hengyi.com		www.hengyishihua.com	CNE0000001J1
101515	000709	河钢股份	2015-12-31	河北钢铁股份有限公司	黑色金属冶炼及压延加工业	C31	河北省石家庄市桥西区裕华西路40号	河北省石家庄市体育南大街385号	1994-06-29	1997-04-16	河北省	石家庄市	050000	李卜海	0311-66770709	0311-66778711	hbgtgf@hebgtjt.com	郭永	91130000104759628H	报告期内公司无收购及出售资产、吸收合并事项	114.5350148163	38.0063421008	114.4814601652	38.0350204451	于勇	钢材、钢坯、钒钛产品等。	10618607852	对所投资企业资产进行运营管理；钢材、钢坯、钒钛产品（三氧化二钒、钒铁合金、钒氮合金、 钛精矿）、耐火材料、炉料、铁精粉、钒渣、钛渣、焦炭、黑色金属、有色金属、化工产品（不含化学危险品）、机械设备及 其零部件、自动化设备及其零部件、五金交电、仪器仪表、橡胶制品、润滑油销售；冶金技术开发、转让及咨询服务；房屋、 设备租赁；国内劳务派遣；商品及技术进出口，但国家限定公司经营或禁止进出口的商品及技术除外	hbgtgf@hbisco.com		www.hebgtgf.com	CNE000000H20
101515	000709	河钢股份	2016-12-31	河钢股份有限公司	黑色金属冶炼及压延加工业	C31	河北省石家庄市体育南大街385号	河北省石家庄市体育南大街385号	1994-06-29	1997-04-16	河北省	石家庄市	050023	李卜海	0311-66770709	0311-66778711	hbgtgf@hebgtjt.com	梁柯英	91130000104759628H	报告期内公司无收购及出售资产、吸收合并事项	114.5350148163	38.0063421008	114.5352738163	38.0063921008	于勇	钢材、钢坯、钒钛产品等。	10618607852	对所投资企业资产进行运营管理;钢材、钢坯、钒钛产品(三氧化二钒、钒铁合金、钒氮合金、钛精矿)、耐火材料、炉料、铁精粉、钒渣、钛渣、焦炭、黑色金属、有色金属、化工产品(不含化学危险品)、机械设备及其零部件、自动化设备及其零部件、五金交电、仪器仪表、橡胶制品、润滑油销售;冶金技术开发、转让及咨询服务;房屋、设备租赁;国内劳务派遣;商品及技术进出口,但国家限定公司经营或禁止进出口的商品及技术除外;(以下限分支机构经营,涉及前置审批的,凭许可证在有效期内经营);钢铁冶炼;钢材、钢坯、钒钛产品(三氧化二钒、五氧化二钒、钒铁合金、钒氮合金、钛精矿)、钒渣、钛渣的生产销售;煤气、粗苯、焦油、氧气、氮气、氩气、氢气、压缩空气的生产销售;危险货物运输(1);普通货运;起重机械安装、改造、维修;压力管道安装;冶金机械设备及配件、电气设备、化工设备、工业炉窑设备安装、维修;自动化及仪表工程设计安装;水暖安装;…	hbgtgf@hbisco.com		www.hebgtgf.com	CNE000000H20
101515	000709	河钢股份	2017-12-31	河钢股份有限公司	黑色金属冶炼及压延加工业	C31	河北省石家庄市体育南大街385号	河北省石家庄市体育南大街385号	1994-06-29	1997-04-16	河北省	石家庄市	050023	李卜海	0311-66770709	0311-66778711	hbgtgf@hebgtjt.com	梁柯英	91130000104759628H	报告期内公司无收购及出售资产、吸收合并事项	114.5350148163	38.0063421008	114.5352738163	38.0063921008	于勇	钢材、钢坯、钒钛产品等。	10618607852	对所投资企业资产进行运营管理;钢材、钢坯、钒钛产品(三氧化二钒、钒铁合金、钒氮合金、钛精矿)、耐火材料、炉料、铁精粉、钒渣、钛渣、焦炭、黑色金属、有色金属、化工产品(不含化学危险品)、机械设备及其零部件、自动化设备及其零部件、五金交电、仪器仪表、橡胶制品、润滑油销售;冶金技术开发、转让及咨询服务;房屋、设备租赁;国内劳务派遣;商品及技术进出口但国家限定公司经营或禁止进出口的商品及技术除外;(以下限分支机构经营涉及前置审批的凭许可证在有效期内经营);钢铁冶炼;钢材、钢坯、钒钛产品(三氧化二钒、五氧化二钒、钒铁合金、钒氮合金、钛精矿)、钒渣、钛渣的生产销售;煤气、粗苯、焦油、氧气、氮气、氩气、氢气、压缩空气的生产销售;危险货物运输(1);普通货运;起重机械安装、改造、维修;压力管道安装;冶金机械设备及配件、电气设备、化工设备、工业炉窑设备安装、维修;自动化及仪表工程设计安装;水暖安装;金属构…	hbgtgf@hbisco.com		www.hebgtgf.com	CNE000000H20
101515	000709	河钢股份	2018-12-31	河钢股份有限公司	黑色金属冶炼及压延加工业	C31	河北省石家庄市体育南大街385号	河北省石家庄市体育南大街385号	1994-06-29	1997-04-16	河北省	石家庄市	050023	李卜海	0311-66770709	0311-66778711	hbgtgf@hebgtjt.com	梁柯英	91130000104759628H	报告期内公司无收购及出售资产、吸收合并事项	114.5350148163	38.0063421008	114.5352738163	38.0063921008	于勇	钢材、钢坯、钒钛产品等。	10618607852	对所投资企业资产进行运营管理;钢材、钢坯、钒钛产品(三氧化二钒、钒铁合金、钒氮合金、钛精矿)、耐火材料、炉料、铁精粉、钒渣、钛渣、焦炭、黑色金属、有色金属、化工产品(不含化学危险品)、机械设备及其零部件、自动化设备及其零部件、五金交电、仪器仪表、橡胶制品、润滑油销售;冶金技术开发、转让及咨询服务;房屋、设备租赁;国内劳务派遣;商品及技术进出口,但国家限定公司经营或禁止进出口的商品及技术除外;(以下限分支机构经营,涉及前置审批的,凭许可证在有效期内经营);钢铁冶炼;钢材、钢坯、钒钛产品(三氧化二钒、五氧化二钒、钒铁合金、钒氮合金、钛精矿)、钒渣、钛渣的生产销售;煤气、粗苯、焦油、氧气、氮气、氩气、氢气、压缩空气的生产销售;危险货物运输(1);普通货运;起重机械安装、改造、维修;压力管道安装;冶金机械设备及配件、电气设备、化工设备、工业炉窑设备安装、维修;自动化及仪表工程设计安装;水暖安装;…	hbgtgf@hbisco.com		www.hebgtgf.com	CNE000000H20
101914	000712	锦龙股份	2015-12-31	广东锦龙发展股份有限公司	资本市场服务	J67	广东省东莞市南城街道鸿福路106号南峰中心第十二层	广东省清远市新城八号区方正二街1号锦龙大厦	1997-04-09	1997-04-15	广东省	东莞市	511518	张丹丹	0763-3369393	0763-3362693	jlgf000712@163.com	罗序浩	91441900MA4URYHQ25	报告期内公司无收购及出售资产、吸收合并事项	113.0496227766	23.6874032956	113.7553032967	23.0130570912	蓝永强	证券业务	896000000	实业投资、房地产开发。	jlgf000712@163.com		www.jlgf.com	CNE000000PJ5
101798	000718	苏宁环球	2016-12-31	苏宁环球股份有限公司	房地产业	K70	吉林省吉林市经济技术开发区九站街718号	江苏省南京市鼓楼区广州路188号17楼,上海市普陀区丹巴路99号苏宁国际天御广场A2座7层	1993-04-01	1997-04-08	吉林省	吉林市	210024,200062	刘登华	025-83247946	025-83247136	suning@suning.com.cn	梁永振	91220000124482910C	报告期内公司无收购及出售资产、吸收合并事项	126.4876275126	43.9670557903	126.4876275126	43.9670557903	张桂平	房地产开发（凭资质经营）等。	3034636384	房地产开发(凭资质经营);投资建设城市基础设施、投资教育及相关产业、投资开发高新技术项目;建材生产(凭环保许可生产);进出口贸易(需专项审批除外);酒店管理;经济信息咨询服务;黄金等贵金属矿投资;有色金属(含稀有金属及稀土金属)矿投资;电力投资;煤炭和石油化工产品的投资;主要产品:房地产及建筑建材业	suning@suning.com.cn		www.suning-universal.com	CNE0000007N0
101808	000723	美锦能源	2017-12-31	山西美锦能源股份有限公司	石油加工、炼焦及核燃料加工业	C25	山西省太原市清徐县贯中大厦	山西省太原市迎泽区劲松北路31号哈伯中心12层	1992-10-22	1997-05-15	山西省	太原市	030002	朱庆华	0351-4236095	0351-4236092	meijinenergy@126.com	杜兆丽	91140000158164363G	出售重大股权情况:交易对方:上海昂毓投资管理合伙企业(有限合伙);被出售股权:大连美锦有限公司30%股权;出售日:2017年03月03日;交易价格(万元):3,000;本期初起至出售日该股权为上市公司贡献的净利润(万元):-5.74;出售对公司的影响:转让子公司股权的目的是引入专业的期货套期保值管理团队;股权出售为上市公司贡献的净利润占净利润总额的比例:0.00%;股权出售定价原则:双方协商;是否为关联交易:否;与交易对方的关联关系:无;所涉及的股权是否已全部过户:是;是否按计划如期实施,如未按计划实施,应当说明原因及公司已采取的措施:是;披露日期:2017年03月06日;披露索引:巨潮资讯网(公告编号:2017-015)	112.3558352353	37.6035810381	112.3553442353	37.6035380381	姚锦龙	焦化厂、煤矿、煤层气的开发、投资等。	4105932102	焦化厂、煤矿、煤层气的开发、投资,批发零售焦炭、金属材料、建材、日用杂品、劳保用品、煤炭、焦炭、煤矸石、金属镁、铁矿粉、生铁的加工与销售。	jennyemail@126.com		www.mjenergy.com	CNE0000005J2
101808	000723	美锦能源	2018-12-31	山西美锦能源股份有限公司	石油加工、炼焦及核燃料加工业	C25	山西省太原市清徐县贯中大厦	山西省太原市迎泽区劲松北路31号哈伯中心12层	1992-10-22	1997-05-15	山西省	太原市	030002	朱庆华	0351-4236095	0351-4236092	mjenergy@mjenergy.cn	杜兆丽	91140000158164363G	报告期内公司无收购及出售资产、吸收合并事项	112.539948613	37.8676571412	112.3553442353	37.6035380381	姚锦龙	焦化厂、煤矿、煤层气的开发、投资等。	4091369052	焦化厂、煤矿、煤层气的开发、投资,批发零售焦炭、金属材料、建材、日用杂品、劳保用品、煤炭、焦炭、煤矸石、金属镁、铁矿粉、生铁的加工与销售。	mjenergy@mjenergy.cn		www.mjenergy.cn	CNE0000005J2
101809	000725	京东方A	2015-12-31	京东方科技集团股份有限公司	计算机、通信和其他电子设备制造业	C39	北京市朝阳区酒仙桥路10号	北京市北京经济技术开发区西环中路12号	1993-04-09	1997-06-10	北京市	北京市	100176	刘洪峰	010-64318888	010-64366264	liuhongfeng@boe.com.cn		911100001011016602	报告期内公司无收购及出售资产、吸收合并事项	116.5148961482	39.7753845016	116.4980534912	39.9781033393	王东升	电子产品及照明产品的生产和销售。	35153067743	电子产品、通信设备、电子计算机软硬件的制造及购销；计算机数据处理；机械电器设备、五金交电、建筑材料、纸制品、工业气体、工具模具、蒸汽热汽的制造、设计、销售；技术开发、技术咨询、技术服务、技术转让；承办展览展销活动；自营和代理各类商品和技术的进出口，但国家限定公司经营或禁止进出口的商品和技术除外；无线电寻呼业务；自有房产的物业管理（含房屋出租）；机动车停车服务。	web.master@boe.com.cn	200725	www.boe.com	CNE0000016L5
101809	000725	京东方A	2016-12-31	京东方科技集团股份有限公司	计算机、通信和其他电子设备制造业	C39	北京市朝阳区酒仙桥路10号	北京市北京经济技术开发区西环中路12号	1993-04-09	1997-06-10	北京市	北京市	100176	刘洪峰	010-64318888	010-64366264	liuhongfeng@boe.com.cn	崔志勇	911100001011016602	报告期内公司无收购及出售资产、吸收合并事项	116.5148961482	39.7753845016	116.4980534912	39.9781033393	王东升	电子产品及照明产品的生产和销售。	35153067743	显示器件、智慧系统、健康服务	web.master@boe.com.cn	200725	www.boe.com	CNE0000016L5
101809	000725	京东方A	2017-12-31	京东方科技集团股份有限公司	计算机、通信和其他电子设备制造业	C39	北京市朝阳区酒仙桥路10号	北京市北京经济技术开发区西环中路12号	1993-04-09	1997-06-10	北京市	北京市	100176	刘洪峰	010-64318888	010-64366264	liuhongfeng@boe.com.cn	崔志勇	911100001011016602	报告期内公司无收购及出售资产、吸收合并事项	116.5148961482	39.7753845016	116.4980534912	39.9781033393	王东升	电子产品及照明产品的生产和销售。	34798398763	显示和传感器件业务、智慧系统业务、健康服务业务。	web.master@boe.com.cn	200725	www.boe.com	CNE0000016L5
101809	000725	京东方A	2018-12-31	京东方科技集团股份有限公司	计算机、通信和其他电子设备制造业	C39	北京市朝阳区酒仙桥路10号	北京市北京经济技术开发区西环中路12号	1993-04-09	1997-06-10	北京市	北京市	100176	刘洪峰	010-64318888	010-64366264	liuhongfeng@boe.com.cn		911100001011016602	报告期内公司无收购及出售资产、吸收合并事项	116.5148961482	39.7753845016	116.4980534912	39.9781033393	王东升	电子产品及照明产品的生产和销售。	34798398763	端口器件业务、智慧物联业务、智慧医工业务。	web.master@boe.com.cn	200725	www.boe.com	CNE0000016L5
104988	000728	国元证券	2015-12-31	国元证券股份有限公司	资本市场服务	J67	安徽省合肥市梅山路18号	安徽省合肥市梅山路18号安徽国际金融中心A座国元证券	1997-06-06	1997-06-16	安徽省	合肥市	230000	陈新	0551-62207323	0551-62207322	chenxin@gyzq.com.cn	刘锦峰	91340000731686376P	报告期内公司无收购及出售资产、吸收合并事项	117.2703442752	31.8504376785	117.2703232752	31.8506176785	蔡咏	证券的代理买卖；证券自营买卖；证券承销；证券投资咨询；客户资产管理等。	1964100000	证券经纪；证券投资咨询；与证券交易、证券投资活动有 关的财务顾问；证券承销与保荐；证券自营；证券资产管理；融资融券；证券投资基 金代销；为期货公司提供中间介绍业务；代销金融产品；保险兼业代理业务。主要业 务为证券的代理买卖；证券自营买卖；证券承销；证券投资咨询；客户资产管理等。	dshbgs@gyzq.com.cn		www.gyzq.com.cn	CNE000000QZ9
104988	000728	国元证券	2016-12-31	国元证券股份有限公司	资本市场服务	J67	安徽省合肥市梅山路18号	安徽省合肥市梅山路18号	1997-06-06	1997-06-16	安徽省	合肥市	230022	刘锦峰	0551-62207968,62207323	0551-62207322	ljf2100@gyzq.com.cn		91340000731686376P	报告期内公司无收购及出售资产、吸收合并事项	117.2703442752	31.8504976785	117.2703232752	31.8506176785	蔡咏	证券的代理买卖；证券自营买卖；证券承销；证券投资咨询；客户资产管理等。	1964100000	证券经纪;证券投资咨询;与证券交易、证券投资活动有关的财务顾问;证券承销与保荐;证券自营;证券资产管理;融资融券;证券投资基金代销;为期货公司提供中间介绍业务;代销金融产品;保险兼业代理业务。主要业务为证券的代理买卖;证券自营买卖;证券承销;证券投资咨询;客户资产管理等。	dshbgs@gyzq.com.cn		www.gyzq.com.cn	CNE000000QZ9
104988	000728	国元证券	2017-12-31	国元证券股份有限公司	资本市场服务	J67	安徽省合肥市梅山路18号	安徽省合肥市梅山路18号	1997-06-06	1997-06-16	安徽省	合肥市	230022	刘锦峰	0551-62207968	0551-62207322	ljf2100@gyzq.com.cn	杨璐	91340000731686376P	报告期内公司无收购及出售资产、吸收合并事项	117.2703442752	31.8504976785	117.2703232752	31.8506176785	蔡咏	证券的代理买卖；证券自营买卖；证券承销；证券投资咨询；客户资产管理等。	3365447047	证券经纪;证券投资咨询;与证券交易、证券投资活动有关的财务顾问;证券承销与保荐;证券自营;证券资产管理;融资融券;证券投资基金代销;为期货公司提供中间介绍业务;代销金融产品;保险兼业代理业务。主要业务为证券的代理买卖;证券自营买卖;证券承销;证券投资咨询;客户资产管理等。	dshbgs@gyzq.com.cn		www.gyzq.com.cn	CNE000000QZ9
104988	000728	国元证券	2018-12-31	国元证券股份有限公司	资本市场服务	J67	安徽省合肥市梅山路18号	安徽省合肥市梅山路18号	1997-06-06	1997-06-16	安徽省	合肥市	230022	刘锦峰	0551-62207968	0551-62207322	ljf2100@gyzq.com.cn	杨璐	91340000731686376P	出售重大股权情况:交易对方:安徽国元金融控股集团有限责任公司;被出售股权:徽商银行股权;出售日:2018年12月19日;交易价格(万元):38492.76;本期初起至出售日该股权为上市公司贡献的净利润(万元):290.64;出售对公司的影响:实现净利润16,899.85万元;股权出售为上市公司贡献的净利润占净利润总额的比例:0.252;股权出售定价原则:按转让合同签署日的前一日(2018年11月12日)徽商银行H股收盘价(每股3.39港币,当日港币的折算率为0.88708),确定为每股3.01元人民币;是否为关联交易:是;与交易对方的关联关系:公司第一大股东;所涉及的股权是否已全部过户:是;是否按计划如期实施,如未按计划实施,应当说明原因及公司已采取的措施:是;披露日期:2018年11月17日;披露索引:《中国证券报》、《证券时报》、《上海证券报》、《证券日报》和巨潮资讯网。公告编号:2…	117.2703232752	31.8506176785	117.2703232752	31.8506176785	蔡咏	证券的代理买卖；证券自营买卖；证券承销；证券投资咨询；客户资产管理等。	3365447047	证券经纪;证券投资咨询;与证券交易、证券投资活动有关的财务顾问;证券承销与保荐;证券自营;证券资产管理;融资融券;证券投资基金代销;为期货公司提供中间介绍业务;代销金融产品;保险兼业代理业务。	dshbgs@gyzq.com.cn		www.gyzq.com.cn	CNE000000QZ9
101694	000729	燕京啤酒	2015-12-31	北京燕京啤酒股份有限公司	酒、饮料和精制茶制造业	C15	北京市顺义区双河路9号	北京市顺义区双河路9号	1997-07-08	1997-07-16	北京市	北京市	101300	刘翔宇	010-89490729	010-89495569	securities@yanjing.com.cn	徐月香	91110000633646901B	报告期内公司无收购及出售资产、吸收合并事项	116.685319364	40.0959562273	116.6832778019	40.0969167008	赵晓东	啤酒产品的开发。	2818539341	许可经营项目：制造啤酒、矿泉水、啤酒原料、饲料、酵母、塑 料箱；餐饮服务；普通货物运输 一般经营项目：销售啤酒、矿泉水、啤酒原料、饲料、酵母、塑料箱、 五金交电、建筑材料、日用百货；技术咨询、技术培训、技术转让；货物进出口；技术 进出口；代理进出口。	yanjing@public.bta.net.cn		www.yanjing.com.cn	CNE000000S84
102309	000738	航发控制	2015-12-31	中航动力控制股份有限公司	铁路、船舶、航空航天和其它运输设备制造业	C37	江苏省无锡市滨湖区刘闾路33号	江苏省无锡市滨湖区梁溪路792号	1997-06-20	1997-06-26	江苏省	无锡市	214063	杨刚强	0510-85706075	0510-85500738	yanggangqiang@aaec.com.cn	王先定	9132020018380588X1	报告期内公司无收购及出售资产、吸收合并事项	120.245226563	31.559083113	120.1511998662	31.5608602063	朱静波	航空、航天发动机控制系统产品及飞机、舰船、陆用液压产品的研制、生产、销售、修理；汽车零部件，摩托车零部件生产和销售。	1145642349	航空、航天船舶动力控制系统、行走机械动力控制系 统、工业自动控制及新能源控制系统及产品的研发、制造、销售、修理、技术转让、技术咨询、技术服务；利用自有资产对 外投资。（依法需经批准的项目，经相关部门批准后方可开展经营活动）。	zhdk@aaec.com.cn		www.aaec.com.cn	CNE000000RM5
102309	000738	航发控制	2016-12-31	中航动力控制股份有限公司	铁路、船舶、航空航天和其它运输设备制造业	C37	江苏省无锡市滨湖区刘闾路33号	江苏省无锡市滨湖区梁溪路792号	1997-06-20	1997-06-26	江苏省	无锡市	214063	樊文辉	0510-85700611	0510-85500738	HFW668@163.com	王先定	9132020018380588X1	报告期内公司无收购及出售资产、吸收合并事项	120.245226563	31.559083113	120.1511998662	31.5608602063	朱静波	航空、航天发动机控制系统产品及飞机、舰船、陆用液压产品的研制、生产、销售、修理；汽车零部件，摩托车零部件生产和销售。	1145642349	航空航天船舶动力控制系统、行走机械动力控制系统、工业自动控制及新能源控制系统及产品的研发、制造、销售、修理、技术转让、技术咨询、技术服务;利用自有资产对外投资。(依法须经批准的项目,经相关部门批准后方可开展经营活动)	zhdk@aaec.com.cn		www.aaec.com.cn	CNE000000RM5
108486	000750	国海证券	2015-12-31	国海证券股份有限公司	资本市场服务	J67	广西壮族自治区桂林市辅星路13号	广西壮族自治区南宁市滨湖路46号国海大厦	1988-10-06	1997-07-09	广西壮族自治区	桂林市	530028	刘峻	0771-5532512	0771-5530903	dshbgs@ghzq.com.cn	马雨飞		报告期内公司无收购及出售资产、吸收合并事项	108.36322417	22.8146049348	110.3107726395	25.2608517945	何春梅	证券经纪；证券投资咨询；与证券交易、证券投资活动有关的财务顾问；证券承销与保荐；证券自营；证券资产管理；证券投资基金代销；为期货公司提供中间介绍业务；融资融券；金融产品代销。	2810361315	证券经纪；证券投资咨询；与证券交易、证券投资活动有关的财务顾问；证券承销与保荐；证券自营；证券资产管理；证券投资基金代销；为期货公司提供中间介绍业务；融资融券；代销金融产品。	dshbgs@ghzq.com.cn		www.ghzq.com.cn	CNE0000008K4
108486	000750	国海证券	2016-12-31	国海证券股份有限公司	资本市场服务	J67	广西壮族自治区桂林市辅星路13号	广西壮族自治区南宁市滨湖路46号国海大厦	1988-10-06	1997-07-09	广西壮族自治区	桂林市	530028	刘峻	0771-5532512	0771-5530903	dshbgs@ghzq.com.cn	马雨飞	91450300198230687E	报告期内公司无收购及出售资产、吸收合并事项	108.36322417	22.8146049348	110.3107726395	25.2608517945	何春梅	证券经纪；证券投资咨询；与证券交易、证券投资活动有关的财务顾问；证券承销与保荐；证券自营；证券资产管理；证券投资基金代销；为期货公司提供中间介绍业务；融资融券；金融产品代销。	4215541972	证券经纪;证券投资咨询;与证券交易、证券投资活动有关的财务顾问;证券承销与保荐;证券自营;证券资产管理;证券投资基金代销;为期货公司提供中间介绍业务;融资融券;代销金融产品。	dshbgs@ghzq.com.cn		www.ghzq.com.cn	CNE0000008K4
101873	000768	中航飞机	2015-12-31	中航飞机股份有限公司	铁路、船舶、航空航天和其它运输设备制造业	C37	陕西省西安市阎良区西飞大道一号	陕西省西安市阎良区西飞大道一号	1997-06-18	1997-06-26	陕西省	西安市	710089	雷阎正	029-86833097	029-81668080	lyz@xac.com.cn	王平新	916100002942059830	报告期内公司无收购及出售资产、吸收合并事项	109.2284766439	34.6564683162	109.2269226439	34.6563633162	刘选民	飞机航空零部件设计、试验、生产。	2768645071	飞机、飞行器零部件、航材和地随设备的设计、试验、生产、维修、改装、销售、服务及相关业务；飞行机务保证及服务；飞机租赁及相关服务保障业务；技术装备的设计、制造、安装、调试及技术服务；航空及其它民用铝合金系列产品和装饰材料的开发、设计、研制、生产、销售以及相关的技术服务；进出口加工业务；动力设备和设施、机电设备、工矿备件、电气、管道、非标设备及特种设备的设计、制造、安装、销售以及技术服务；碳材料和粉末冶金制品、橡胶件、塑料件、锻铸件的制造；城市暖通工程、天然气安装工程、电子工程的设计、运行、安装、维护、管理及技术服务；汽车零部件的制造、维修、销售及技术服务；客户培训及相关配套服务；员工培训（仅限本系统内部员工）。（上述范围中国家法律、行政法规和国务院决定规定必须报经批准的，凭许可证在有效期内经营；未经批准的，不得从事经营活动）。	zhfj000768@avic.com		www.aircraft_co.avic.com	CNE000000RF9
101873	000768	中航飞机	2016-12-31	中航飞机股份有限公司	铁路、船舶、航空航天和其它运输设备制造业	C37	陕西省西安市阎良区西飞大道一号	陕西省西安市阎良区西飞大道一号	1997-06-18	1997-06-26	陕西省	西安市	710089	雷阎正	029-86847885	029-86846031	lyz@xac.com.cn	王平新	916100002942059830	报告期内公司无收购及出售资产、吸收合并事项	109.2284766439	34.6564683162	109.2269226439	34.6563633162	刘选民	飞机航空零部件设计、试验、生产。	2768645071	飞机、飞行器零部件、航材和地随设备的设计、试验、生产、维修、改装、销售、服务及相关业务;飞行机务保证及服务;飞机租赁及相关服务保障业务;技术装备的设计、制造、安装、调试及技术服务;航空及其它民用铝合金系列产品和装饰材料的开发、设计、研制、生产、销售以及相关的技术服务;进出口加工业务;动力设备和设施、机电设备、工矿备件、电气、管道、非标设备及特种设备的设计、制造、安装、销售以及技术服务;碳材料和粉末冶金制品、橡胶件、塑料件、锻铸件的制造;城市暖通工程、天然气安装工程、电子工程的设计、运行、安装、维护、管理及技术服务;汽车零部件的制造、维修、销售及技术服务;客户培训及相关配套服务;员工培训(仅限本系统内部员工)。(上述范围中国家法律、行政法规和国务院决定规定必须报经批准的,凭许可证在有效期内经营;未经批准的,不得从事经营活动)。	zhfj000768@avic.com		www.aircraft_co.avic.com	CNE000000RF9
101873	000768	中航飞机	2017-12-31	中航飞机股份有限公司	铁路、船舶、航空航天和其它运输设备制造业	C37	陕西省西安市阎良区西飞大道一号	陕西省西安市阎良区西飞大道一号	1997-06-18	1997-06-26	陕西省	西安市	710089	陈和潮	029-86847885	029-86846031	chenhc@xac.com.cn	潘燕	916100002942059830	报告期内公司无收购及出售资产、吸收合并事项	109.2284766439	34.6564683162	109.2269226439	34.6563633162	刘选民	飞机航空零部件设计、试验、生产。	2768645071	飞机、飞行器零部件、航材和地随设备的设计、试验、生产、维修、改装、销售、服务及相关业务;飞行机务保证及服务;飞机租赁及相关服务保障业务;技术装备的设计、制造、安装、调试及技术服务;航空及其它民用铝合金系列产品和装饰材料的开发、设计、研制、生产、销售以及相关的技术服务;进出口加工业务;动力设备和设施、机电设备、工矿备件、电气、管道、非标设备及特种设备的设计、制造、安装、销售以及技术服务;碳材料和粉末冶金制品、橡胶件、塑料件、锻铸件的制造;城市暖通工程、天然气安装工程、电子工程的设计、运行、安装、维护、管理及技术服务;汽车零部件的制造、维修、销售及技术服务;客户培训及相关配套服务;员工培训(仅限本系统内部员工)。(上述范围中国家法律、行政法规和国务院决定规定必须报经批准的,凭许可证在有效期内经营;未经批准的,不得从事经营活动)。	zhfj000768@avic.com		www.aircraft_co.avic.com	CNE000000RF9
101873	000768	中航飞机	2018-12-31	中航飞机股份有限公司	铁路、船舶、航空航天和其它运输设备制造业	C37	陕西省西安市阎良区西飞大道一号	陕西省西安市阎良区西飞大道一号	1997-06-18	1997-06-26	陕西省	西安市	710089	陈和潮	029-86847885	029-86846031	chenhc@avic.com	龚亮	916100002942059830	报告期内公司无收购及出售资产、吸收合并事项	109.2284766439	34.6564683162	109.2269226439	34.6563633162	何胜强	飞机航空零部件设计、试验、生产。	2768645071	飞机、飞行器零部件、航材和地随设备的设计、试验、生产、维修、改装、销售、服务及相关业务;飞行机务保证及服务;飞机租赁及相关服务保障业务;技术装备的设计、制造、安装、调试及技术服务;航空及其它民用铝合金系列产品和装饰材料的开发、设计、研制、生产、销售以及相关的技术服务;进出口加工业务;动力设备和设施、机电设备、工矿备件、电气、管道、非标设备及特种设备的设计、制造、安装、销售以及技术服务;碳材料和粉末冶金制品、橡胶件、塑料件、锻铸件的制造;城市暖通工程、天然气安装工程、电子工程的设计、运行、安装、维护、管理及技术服务;汽车零部件的制造、维修、销售及技术服务;客户培训及相关配套服务;员工培训(仅限本系统内部员工)。(上述范围中国家法律、行政法规和国务院决定规定必须报经批准的,凭许可证在有效期内经营;未经批准的,不得从事经营活动)。	zhfj000768@avic.com		www.aircraft_co.avic.com	CNE000000RF9
101506	000776	广发证券	2015-12-31	广发证券股份有限公司	资本市场服务	J67	广东省广州市天河区天河北路183-187号大都会广场43楼(4301-4316房)	广东省广州市天河区天河北路183-187号大都会广场5楼、7楼、8楼、18楼、19楼、38楼、39楼、40楼、41楼、42楼、43楼和44楼	1993-04-03	1997-06-11	广东省	广州市	510075	罗斌华	020-87550265,87550565	020-87553600	lbh@gf.com.cn	徐佑军	91440000126335439C	报告期内公司无收购及出售资产、吸收合并事项	113.3223540413	23.1416853882	113.3225400413	23.1416963882	孙树明	证券经纪;证券投资咨询;与证券交易、证券投资活动有关的财务顾问等。	7621087664	证券经纪；证券投资咨询；与证券交易、证券投资活动有关的财 务顾问；证券承销与保荐；证券自营；融资融券；证券投资基金代销；证券投资基金托 管；为期货公司提供中间介绍业务；代销金融产品；股票期权做市。(依法须经批准的项 目，经相关部门批准后方可开展经营活动。)	dshb@gf.com.cn	01776	www.gf.com.cn	CNE0000008L2
101506	000776	广发证券	2016-12-31	广发证券股份有限公司	资本市场服务	J67	广东省广州市天河区天河北路183-187号大都会广场43楼(4301-4316房)	广东省广州市天河区天河北路183-187号大都会广场5楼、7楼、8楼、17楼、18楼、19楼、38楼、39楼、40楼、41楼、42楼、43楼和44楼	1993-04-03	1997-06-11	广东省	广州市	510620	罗斌华	020-87550265,87550565	020-87553600	lbh@gf.com.cn	徐佑军	91440000126335439C	报告期内公司无收购及出售资产、吸收合并事项	113.3223540413	23.1416853882	113.3225400413	23.1416963882	孙树明	证券经纪;证券投资咨询;与证券交易、证券投资活动有关的财务顾问等。	7621087664	证券经纪;证券投资咨询;与证券交易、证券投资活动有关的财务顾问;证券承销与保荐;证券自营;融资融券;证券投资基金代销;证券投资基金托管;为期货公司提供中间介绍业务;代销金融产品;股票期权做市。(依法须经批准的项目,经相关部门批准后方可开展经营活动)	dshb@gf.com.cn	01776	www.gf.com.cn	CNE0000008L2
101506	000776	广发证券	2017-12-31	广发证券股份有限公司	资本市场服务	J67	广东省广州市黄埔区中新广州知识城腾飞一街2号618室	广东省广州市天河区天河北路183-187号大都会广场5楼、7楼、8楼、17楼、18楼、19楼、38楼、39楼、40楼、41楼、42楼、43楼和44楼	1993-04-03	1997-06-11	广东省	广州市	510620	罗斌华	020-87550265,87550565	020-87553600	lbh@gf.com.cn	徐佑军	91440000126335439C	报告期内公司无收购及出售资产、吸收合并事项	113.4914620234	23.3932045473	113.6200032239	23.2880970038	孙树明	证券经纪;证券投资咨询;与证券交易、证券投资活动有关的财务顾问等。	7621087664	证券经纪;证券投资咨询;与证券交易、证券投资活动有关的财务顾问;证券承销与保荐;证券自营;融资融券;证券投资基金代销;证券投资基金托管;为期货公司提供中间介绍业务;代销金融产品;股票期权做市。(依法须经批准的项目,经相关部门批准后方可开展经营活动。)	dshb@gf.com.cn	01776	www.gf.com.cn	CNE0000008L2
101506	000776	广发证券	2018-12-31	广发证券股份有限公司	资本市场服务	J67	广东省广州市黄埔区中新广州知识城腾飞一街2号618室	广东省广州市天河区马场路26号广发证券大厦	1993-04-03	1997-06-11	广东省	广州市	510627	罗斌华	020-87550265,87550565	020-87553600	lbh@gf.com.cn	徐佑军	91440000126335439C	报告期内公司无收购及出售资产、吸收合并事项	113.3433855622	23.1135165727	113.6200032239	23.2880970038	孙树明	证券经纪;证券投资咨询;与证券交易、证券投资活动有关的财务顾问等。	7621087664	证券经纪;证券投资咨询;与证券交易、证券投资活动有关的财务顾问;证券承销与保荐;证券自营;融资融券;证券投资基金代销;证券投资基金托管;为期货公司提供中间介绍业务;代销金融产品;股票期权做市。(依法须经批准的项目,经相关部门批准后方可开展经营活动。)	dshb@gf.com.cn	01776	www.gf.com.cn	CNE0000008L2
101267	000778	新兴铸管	2015-12-31	新兴铸管股份有限公司	金属制品业	C33	河北省武安市上洛阳村北(二六七二厂区)	河北省武安市上洛阳村北(二六七二厂区)	1997-05-24	1997-06-06	河北省	武安市	056300	曾耀赣	0310-5792011,010-65168778,65168822	0310-5796999,010-65168808	xxzg0778@163.com		91130400104365768G	报告期内公司无收购及出售资产、吸收合并事项	114.1320914033	36.6093292886	114.1349384033	36.6092492886	李成章	离心球墨铸铁管、灰铁排水管、新型复合管材及配套管件的生产、销售等。	3643307361	离心球墨铸铁管、灰铁排水管、新型复合管材及配套管件；铸造及 机械设备及相关产品、焦炭及其副产品粗苯、焦油、农用化肥硫氨等、氧气制备及其 副产品氩气、氮气的生产、销售（安全生产许可证有效期至2017年10月11日）； 钢铁冶炼及压延加工；钢铁、铸管生产过程的副产品及相关辅助材料的销售；与上述 业务相关的技术开发、技术服务、工程设计、工程建设承包（凭资质证书经营）；受 托代收电费服务；货物和技术的进出口（国家限定公司经营或禁止进出口的商品和技 术除外）；与上述业务相关的原材料（铁矿石、铁精粉、烧结矿、球团矿、焦炭、焦 粉、焦粒）、合金料、钢材的销售。	xxzg0778@163.com		www.xinxing-pipes.com	CNE000000QG9
101434	000783	长江证券	2015-12-31	长江证券股份有限公司	资本市场服务	J67	湖北省武汉市江汉区新华路特8号	湖北省武汉市江汉区新华路特8号	1997-07-24	1997-07-31	湖北省	武汉市	430015	崔少华(代)	027-65799866	027-85481726	cuish@cjsc.com	李佳		报告期内公司无收购及出售资产、吸收合并事项	114.2707355078	30.6018643102	114.2707355078	30.6018643102	杨泽柱	证券代理买卖、付息,咨询,承销。	4742467678	证券与期货经纪；证券与期货投资咨询；证券承销与保荐；证券自 营；融资融券；证券投资基金代销；与证券交易、证券投资活动有关的财务顾问；代销金融产品；股票期 权做市业务；证券与期货资产管理；股权投资业务；多种期现货商品的贸易、贸易经纪及代理。	inf@cjsc.com.cn		www.cjsc.com	CNE000000SH3
101434	000783	长江证券	2016-12-31	长江证券股份有限公司	资本市场服务	J67	湖北省武汉市江汉区新华路特8号	湖北省武汉市江汉区新华路特8号	1997-07-24	1997-07-31	湖北省	武汉市	430015	李佳	027-65799866	027-85481726	lijia@cjsc.com	黄育文	91420000700821272A	报告期内公司无收购及出售资产、吸收合并事项	114.2707355078	30.6018643102	114.2707355078	30.6018643102	尤习贵	证券代理买卖、付息,咨询,承销。	5529467678	证券与期货经纪;证券与期货投资咨询;证券承销与保荐;证券自营;融资融券;证券投资基金代销;与证券交易、证券投资活动有关的财务顾问;代销金融产品;股票期权做市业务;证券与期货资产管理;股权投资业务;多种期现货商品的贸易、贸易经纪及代理。	inf@cjsc.com.cn		www.cjsc.com	CNE000000SH3
101434	000783	长江证券	2017-12-31	长江证券股份有限公司	资本市场服务	J67	湖北省武汉市江汉区新华路特8号	湖北省武汉市江汉区新华路特8号	1997-07-24	1997-07-31	湖北省	武汉市	430015	李佳	027-65799866	027-85481726	lijia@cjsc.com	黄育文	91420000700821272A	报告期内公司无收购及出售资产、吸收合并事项	114.2707355078	30.6018643102	114.2707355078	30.6018643102	尤习贵	证券代理买卖、付息,咨询,承销。	5529467678	证券与期货经纪;证券自营;证券承销与保荐;与证券交易、证券投资活动有关的财务顾问;证券与期货资产管理;公开募集证券投资基金管理业务;证券与期货投资咨询;融资融券业务;证券投资基金代销;代销金融产品;股票期权做市业务;私募投资基金业务;股权投资、创新投资;多种期现货商品的贸易、贸易经纪及代理。	inf@cjsc.com.cn		www.cjsc.com	CNE000000SH3
101434	000783	长江证券	2018-12-31	长江证券股份有限公司	资本市场服务	J67	湖北省武汉市江汉区新华路特8号	湖北省武汉市江汉区新华路特8号	1997-07-24	1997-07-31	湖北省	武汉市	430015	李佳	027-65799866	027-85481726	lijia@cjsc.com	黄育文	91420000700821272A	报告期内公司无收购及出售资产、吸收合并事项	114.2707355078	30.6018643102	114.2707355078	30.6018643102	李新华	证券代理买卖、付息,咨询,承销。	5529479698	证券与期货经纪;证券自营;证券承销与保荐;与证券交易、证券投资活动有关的财务顾问;证券与期货资产管理;公开募集证券投资基金管理业务;证券与期货投资咨询;融资融券业务;证券投资基金代销;代销金融产品;股票期权做市业务;私募股权投资基金管理;股权投资、创新投资;多种期现货商品的贸易、贸易经纪及代理。	inf@cjsc.com.cn		www.cjsc.com	CNE000000SH3
101453	000786	北新建材	2018-12-31	北新集团建材股份有限公司	非金属矿物制品业	C30	北京市海淀区复兴路17号国海广场2号楼15层	北京市昌平区北京未来科学城七北路9号北新中心A座	1997-05-30	1997-06-06	北京市	北京市	102209	史可平	010-57868786	010-57868866	bnbm@bnbm.com.cn	卢平(证券事务专员)	91110000633797400C	报告期内公司无收购及出售资产、吸收合并事项	116.4777387819	40.1196833863	116.3135830324	39.9094176659	王兵	纸面和装饰石膏板、轻钢龙骨等制造和销售。	1689507842	制造新型建筑材料、新型墙体材料、化工产品(不含危险化学品及一类易制毒化学品)、水暖管件、装饰材料、建材机械电器设备、新型建筑材料的房屋;销售建筑材料、新型墙体材料、化工产品、装饰材料、建材机械电器设备、新型建筑材料的房屋、金属材料、矿产品、五金交电、建筑机械、建筑防水材料、涂料、砂浆、水泥制品、保温隔热材料、粘接材料;技术开发、技术转让、技术服务、技术咨询、技术培训;环保节能产品的开发利用;经营本企业自产产品及相关技术的出口业务;经营本企业生产、科研所需的原辅材料、机械设备、仪器仪表、零配件及相关技术的进口业务;经营本企业的进料加工和“三来一补”业务;出租办公用房、出租商业用房;设备租赁;物业管理;以下项目限外埠分支机构经营:制造建筑防水材料、涂料、砂浆、水泥制品、保温隔热材料、粘接材料。(企业依法自主选择经营项目,开展经营活动;依法须经批准的项目,经相关部门批准后依批准的内容开展经营活…	bnbm@bnbm.com.cn		www.bnbm.com.cn	CNE000000QS4
101445	000792	盐湖股份	2015-12-31	青海盐湖工业股份有限公司	化学原料及化学制品制造业	C26	青海省格尔木市黄河路28号	青海省格尔木市黄河路28号	1997-08-25	1997-09-04	青海省	格尔木市	816000	李勇	0979-8448123	0979-8434445	qhyhgygf@126.com	李舜	91630000226593742J	报告期内公司无收购及出售资产、吸收合并事项	94.9109094034	36.3914543525	94.9067734034	36.3901633525	王兴富	氯化钾产品的开发、生产、销售。	1857393734	氢氧化钾、甲醇、盐酸、硫酸、液氨、液氯、次氧酸钠、液氧、液氮、 液氩、镁（片状、带状或条状）、电石、液化石油气、煤焦油、二甲醇氨、乌洛托品、硫化 碱、氢氧化钠、硝酸钾、丁烷、戊烷、硫磺、丙烷、金属锂、氢氧化锂的销售（许可证有效 期至2016年11月25日）；氯化钾（化肥）、硫酸钾、碳酸钾、金属镁、氯化镁、氧化镁、氢 氧化镁、纯碱、PVC 、合成氨、尿素、氯化铵、碳酸锂、钠附选药剂、ADC发泡剂、光卤石、 低纳光卤石、联二脲、甲醇、次氯酸钠以及塑料编织品的的制造和销售（国家有关项规定的 除外）、钾盐露天开采；建设监理、设备安装工程施工（不含特种设备），出口自产化学品 （不含危险化学品）、进口本企业生产、研究所需要的材料、机电设备、仪器仪表及零售件； 酒店和物业管理；百货、针纺织品、五金交电、化工产品（不含危险化学品）、日用杂货、 仓储、计算机系统工程建设、软件开发、硬件销售、维护、计算机耗…	qhyhgygf@126.com		www.qhyhgf.com	CNE000000SW2
101445	000792	盐湖股份	2016-12-31	青海盐湖工业股份有限公司	化学原料及化学制品制造业	C26	青海省格尔木市黄河路28号	青海省格尔木市黄河路28号	1997-08-25	1997-09-04	青海省	格尔木市	816000	李勇	0979-8448123	0979-8434445	qhyhgygf@126.com	李舜	91630000226593742J	出售重大股权情况:交易对方:上海民泰投资(集团)有限公司;被出售股权:上海富友房产有限公司;出售日:2016年01月27日;交易价格(万元):32,678.6;出售对公司的影响:因出售上海富友股权,公司报告期确认投资收益24887.9万元;股权出售为上市公司贡献的净利润占净利润总额的比例:72.93%;股权出售定价原则:公开竞价;是否为关联交易:否;与交易对方的关联关系:不适用;所涉及的股权是否已全部过户:是;是否按计划如期实施,如未按计划实施,应当说明原因及公司已采取的措施:是;披露日期:2016年01月29日:披露索引:巨潮咨询网(www.cninfo.com.cn)	94.9109094034	36.3914543525	94.9067734034	36.3901633525	王兴富	氯化钾产品的开发、生产、销售。	1857393734	氢氧化钾、甲醇、盐酸、硫酸、液氨、液氯、次氧酸钠、液氧、液氮、液氩、镁(片状、带状或条状)、电石、液化石油气、粗苯、煤焦油、偶氮、二甲酰氨、乌洛托品、硫化碱、氢氧化钠、硝酸钾、丁烷、戊烷、硫磺、丙烷、金属锂、氢氧化锂的销售(许可证有效期至2016年11月26日);氯化钾(化肥)、硫酸钾、碳酸钾、金属镁、氯化镁、氧化镁、氢氧化镁、纯碱、PVC、合成氨、尿素、氯化铵、碳酸锂、钠浮选药剂、ADC发泡剂、光卤石、低钠光卤石、联二脲、甲醇、次氯酸钠以及塑料编织品的的制造和销售(国家有关项规定的除外)、钾盐露天开采;建设监理、设备安装工程施工(不含特种设备),出口自产化学品(不含危险化学品)、进口本企业生产、研究所需要的原材料、机电设备、仪器仪表及零售件;酒店和物业管理;百货、针纺织品、五金交电、化工产品(不含危险化学品)、日用杂货、仓储、计算机系统工程建设、软件开发、硬件销售、维护、计算机耗材销售…	qhyhgygf@126.com		www.qhyhgf.com	CNE000000SW2
101445	000792	盐湖股份	2017-12-31	青海盐湖工业股份有限公司	化学原料及化学制品制造业	C26	青海省格尔木市黄河路28号	青海省格尔木市黄河路28号	1997-08-25	1997-09-04	青海省	格尔木市	816000	李舜	0979-8448121	0979-8434445	lishun000792@126.com	李岩;巨敏	91630000226593742J	报告期内公司无收购及出售资产、吸收合并事项	94.9109094034	36.3914543525	94.9067734034	36.3901633525	王兴富	氯化钾产品的开发、生产、销售。	2786090601	氢氧化钾、甲醇、盐酸、硫酸、液氨、液氯、液氧、液氮、液氩、镁[片状、带状或条状]、电石、液化石油气、粗苯、煤焦油、偶氮二甲酰胺、二氧化碳、硫化碱、氢氧化钠、硝酸钾、硝酸钠、丁烷、戊烷、硫磺、丙烷、金属锂、乌洛托品、氢氧化锂的销售(许可证有效期至2019年12月20日);氯化钾(化肥)、硫酸钾、碳酸钾、金属镁、氯化镁、氧化镁、氢氧化镁、纯碱、PVC、合成氨、尿素、氯化铵、氯化锂、碳酸锂、钠浮选药剂、ADC发泡剂、乌洛托品、光卤石、低钠光卤石、联二脲、甲醇、次氯酸钠以及塑料编织品的制造和销售(国家有关专项规定的除外);钾盐露天开采;建设监理、设备安装工程施工(不含特种设备),出口自产的化学品(不含危险化学品和易制毒化学品),进口本企业生产、科研所需要的原材料、机电设备、仪器仪表及零配件;酒店和物业管理;百货、针纺织品、五金交电、化工产品(不含危险化学品和易制毒化学品)、日用杂货、仓储、计算机…	qhyhgygf@126.com		www.qhyhgf.com	CNE000000SW2
101823	000793	华闻传媒	2015-12-31	华闻传媒投资集团股份有限公司	新闻和出版业	R85	海南省海口市海甸四东路民生大厦	海南省海口市海甸四东路民生大厦	1992-12-17	1997-07-29	海南省	海口市	570208	金日	0898-66254650	0898-66254650,66255636	board@000793.com	邱小妹	914600002012502172	出售重大股权情况： 交易对方：合一信息 被出售股权：新疆华商盈通股权投资有限公司持有的北京磨铁图书有限公司280.57875 万元出资额 出售日：2015 年 12 月 30 日 交易价格（万元）：15,322.98 本期初起至出售日该股权为上市公司贡献的净利润（万元）：0 出售对公司的影响：出售股权对公司业务连续性、管理层稳定性没有影响，报告期内尚未确认股权转让投资收益，该项收益将计入 2016 年度 股权出售为上市公司贡献的净利润占净利润总额的比例：0.00% 股权出售定价原则:本次交易中对所有售股方的定价依据相同，由各方协商确定 是否为关联交易：否 与交易对方的关联关系：与交易对方不存在关联关系 所涉及的股权是否已全部过户：是 是否按计划如期实施，如未按计划实施，应当说明原因及公司已采取的措施：按计划如期实施 披露日期：2016 年 01 月 04 日 披露索引:详见巨潮网上《关于…	110.3467402372	20.0563866199	110.3466622372	20.0562376199	汪方怀	传播与文化产业的投资、开发，燃气开发、经营、管理及销售等。	2051228683	传播与文化产业的投资、开发、管理及咨询服务；信息集成、多媒体 内容制作与经营；广告策划、制作和经营；多媒体技术开发与投资；电子商务；燃气开发、经营、管理及 燃气设备销售；高科技风险投资；贸易及贸易代理（凡需行政许可的项目凭许可证经营）。	hwm@000793.com		www.000793.com	CNE0000002L5
101823	000793	华闻传媒	2016-12-31	华闻传媒投资集团股份有限公司	新闻和出版业	R85	海南省海口市海甸四东路民生大厦	海南省海口市海甸四东路民生大厦	1992-12-17	1997-07-29	海南省	海口市	570208	金日	0898-66254650	0898-66254650,66255636	board@000793.com	邱小妹	914600002012502172	出售重大股权情况:交易对方:合一信息;-;-;被出售股权:华商盈通持有的磨铁图书280.57875万元出资额;江苏力星通用钢球股份有限公司332.5万股股份;深圳市索菱实业股份有限公司820.8105万股股份;出售日:2015年12月30日;2016年07月05日;2016年07月07日;交易价格(万元):15,322.98;10,499.83;31,544.8;本期初起至出售日该股权为上市公司贡献的净利润(万元):0;134.75;;出售对公司的影响:出售股权对公司业务连续性、管理层稳定性没有影响,本报告期确认股权转让投资收益9,453.34万元;于2016年3-7月出售力星股份332.5万股,本报告期确认投资收益8,451.83万元;于2016年7月出售索菱股份820.8105万股,本报告期确认投资收益25,515.38万元;股权出售为上市公司贡献的净利润占净利润总额的比例:7.57…	110.3467402372	20.0563866199	110.3466622372	20.0562376199	汪方怀	传播与文化产业的投资、开发，燃气开发、经营、管理及销售等。	2017365965	传播与文化产业的投资、开发、管理及咨询服务;信息集成、多媒体内容制作与经营;广告策划、制作和经营;多媒体技术开发与投资;电子商务;燃气开发、经营、管理及燃气设备销售;高科技风险投资;贸易及贸易代理(凡需行政许可的项目凭许可证经营)。	hwm@000793.com		www.000793.com	CNE0000002L5
101528	000800	一汽轿车	2015-12-31	一汽轿车股份有限公司	汽车制造业	C36	吉林省长春市高新技术产业开发区蔚山路4888号	吉林省长春市高新技术产业开发区蔚山路4888号	1997-06-10	1997-06-18	吉林省	长春市	130012	陈清华	0431-85781108,85781107	0431-85781100	fawcar0800@faw.com.cn	杨育欣	91220101244976413E	报告期内公司无收购及出售资产、吸收合并事项	125.2363875319	43.8212282665	125.2274563751	43.8198761776	许宪平	开发、制造、销售小轿车、旅游车及其配件、其他汽车及其配件。	1627500000	开发、制造、销售轿车、旅行车及其配件，修理汽车，加工非标设备， 机械配件、机电产品（不含小轿车）销售；普通货运、物流服务。	fawcar0800@faw.com.cn		www.fawcar.com.cn	CNE000000R85
101550	000825	太钢不锈	2015-12-31	山西太钢不锈钢股份有限公司	黑色金属冶炼及压延加工业	C31	山西省太原市尖草坪街2号	山西省太原市尖草坪街2号	1998-06-11	1998-10-21	山西省	太原市	030003	杨贵龙	0351-3017728,3017729	0351-3017729	tgbx@tisco.com.cn	安峰	91140000701011888X	报告期内公司无收购及出售资产、吸收合并事项	112.5599099544	37.9151747964	112.5601049544	37.9165587964	高祥明	黑金属冶炼、不锈钢及其钢制品等的生产和销售。	5696247796	不锈钢及其他钢材、钢坯、钢锭、黑色金属、铁合金、金属制品的生产、销售；钢 铁生产所需原辅材料的国内贸易和进出口；批发零售建材、普通机械及配件、电器机械及器材，技术咨询 服务，冶金技术开发、转让，冶金新技术、新产品、新材料的推广；铁矿及伴生矿的加工、输送、销售； 焦炭及焦化副产品、生铁及副产品的生产、销售；化肥（硫酸铵）生产、销售；生产销售电子产品、仪器、 仪表、称重系统、工业自动化工程、工业电视设计安装、计量、检测（以上经营范围除国家专控品，需审 批的凭许可文件经营）。代理通信业务收费服务（根据双方协议）。为公司承揽连接至公用通信网的用户 通信管道、用户通信线路、综合布线及其配套的设备工程建设业务。工程设计、施工（凭资质证经营）。 承包本行业境外工程和境内国际招标及所需的设备、材料和零配件的进出口；对外派遣本行业工程生产及 服务的劳务人员（国家实行专项审批的项目除外）。	tgbx@tisco.com.cn		www.tisco.com.cn	CNE000000WM5
101833	000826	启迪桑德	2015-12-31	启迪桑德环境资源股份有限公司	生态保护和环境治理业	N77	湖北省宜昌市沿江大道114号	湖北省宜昌市绿萝路77号	1993-10-11	1998-02-25	湖北省	宜昌市	443000	马勒思	0717-6442936	0717-6442830	ss000826@126.com	张维娅	91420000179120511T	报告期内公司无收购及出售资产、吸收合并事项	111.303254281	30.7065162197	111.2888734133	30.690556744	文一波	市政给水、污水处理项目投资及运营；城市垃圾及工业固体废弃物处置及危险废弃物处置及回收利用相关配套设施设计。	846536940	城市垃圾及工业固体废弃物处置及危险废弃物处置及回收利用相关配套设施设计、建设、投资、运营管 理、相关设备的生产与销售、技术咨询及配套服务;环卫项目投资建设、城市生活垃圾经营性清扫、收集、运输、处理 (涉及许可经营项目,应取得相关部门许可后方可经营);市政给水、污水处理项目投资及运营;土木工程建筑;房屋 工程建筑;高科技产品开发;货物进出口和技术进出口(不含国家禁止或限制进出口的货物或技术)。	000826@tus-sound.com		www.soundenvironmental.cn	CNE000000BX6
101833	000826	启迪桑德	2016-12-31	启迪桑德环境资源股份有限公司	生态保护和环境治理业	N77	湖北省宜昌市沿江大道114号	湖北省宜昌市绿萝路77号	1993-10-11	1998-02-25	湖北省	宜昌市	443000	马勒思	0717-6442936	0717-6442830	ss000826@126.com	张维娅	91420000179120511T	报告期内公司无收购及出售资产、吸收合并事项	111.303254281	30.7065162197	111.2888734133	30.690556744	文一波	市政给水、污水处理项目投资及运营；城市垃圾及工业固体废弃物处置及危险废弃物处置及回收利用相关配套设施设计。	854297580	城市垃圾及工业固体废弃物处置及危险废弃物处置及回收利用相关配套设施设计、建设、投资、运营管理、相关设备的生产与销售、技术咨询及配套服务;环卫项目投资建设、城市生活垃圾经营性清扫、收集、运输、处理(涉及许可经营项目,应取得相关部门许可后方可经营);市政给水、污水处理项目投资及运营;土木工程建筑;房屋工程建筑;高科技产品开发;货物进出口和技术进出口(不含国家禁止或限制进出口的货物或技术)。	000826@tus-sound.com		www.tus-sound.com	CNE000000BX6
101833	000826	启迪桑德	2017-12-31	启迪桑德环境资源股份有限公司	生态保护和环境治理业	N77	湖北省宜昌市沿江大道114号	湖北省宜昌市绿萝路77号	1993-10-11	1998-02-25	湖北省	宜昌市	443000	马勒思	0717-6442936	0717-6442936	000826@tus-sound.com	张维娅	91420000179120511T	报告期内公司无收购及出售资产、吸收合并事项	111.303254281	30.7065162197	111.2888734133	30.690556744	文一波	市政给水、污水处理项目投资及运营；城市垃圾及工业固体废弃物处置及危险废弃物处置及回收利用相关配套设施设计。	1021841989	城市垃圾及工业固体废弃物处置及危险废弃物处置及回收利用相关配套设施设计、建设、投资、运营管理、相关设备的生产与销售、技术咨询及配套服务;环卫项目投资建设、城市生活垃圾经营性清扫、收集、运输、处理(涉及许可经营项目,应取得相关部门许可后方可经营);市政给水、污水处理项目投资及运营;土木工程建筑;房屋工程建筑;高科技产品开发;货物进出口和技术进出口(不含国家禁止或限制进出口的货物或技术)。	000826@tus-sound.com		www.tus-sound.com	CNE000000BX6
101284	000839	中信国安	2015-12-31	中信国安信息产业股份有限公司	电信、广播电视和卫星传输服务	I63	北京市海淀区海淀南路32号	北京市朝阳区关东店北街1号国安大厦五层	1997-10-14	1997-10-31	北京市	北京市	100025	张荣亮	010-65008037	010-65061482	zhangrl@citicguoaninfo.com			重大资产和股权出售: 经2015年1月23日召开的公司第五届董事会第五十七次会议及2015年2月9日召开的2015年第一次临时股东大会审议通过公司将所持有的青海中信国安科技发展有限公司剩余49%股权全部转让给中信国安投资有限公司。转让价格以青海中信国安科技发展有限公司截至2014年10月31日的净资产评估值为基础确定,为人民币10.45亿元。股权转让完成后,本公司不再持有青海国安公司股份,公司退出盐湖资源综合开发领域。本次交易将提高公司的资金使用效率,提高资产流动性,并增加公司利润。本次转让青海公司49%股权我公司可取得资金10.45亿元。公司转让青海股权交易的实施将进一步完善公司以信息产业为核心的产业布局,有利于优化公司的资产结构,改善资产质量,突出公司的主营优势,增强公司整体盈利能力,维护公司股东的利益。(相关公告分别刊登于2015年1月24日、2015年2月10日的《中国证券报》、…	116.4531841161	39.922393295	116.304327258	39.9751425157	罗宁	卫星通讯、网络工程、信息传输、有线电视、移动通讯等。	1567930541	信息网络基础设施业务中的有线电视网、卫星通信网的投资建设,信息服务业中的增值电信服务、网络系统集成、应用软件开发,高科技产业中的新材料开发和生产,以及房地产开发和物业管理等业务。	guoan@citicguoaninfo.com		www.citicguoaninfo.com	CNE000000TD0
101284	000839	中信国安	2016-12-31	中信国安信息产业股份有限公司	电信、广播电视和卫星传输服务	I63	北京市海淀区上地东路5号院1号楼三层	北京市朝阳区朝阳北路225号京龙大厦	1997-10-14	1997-10-31	北京市	北京市	100020	张荣亮	010-65008037	010-65061482	zhangrl@citicguoaninfo.com	权博	911100001000278763	重大资产和股权出售:经2016年3月7日召开的公司第五届董事会第八十六次会议审议通过,为进一步突出公司主营,调整公司的业务结构,公司向中信国安投资有限公司转让公司控股子公司中信国安房地产开发有限公司持有的北海中信国安红树林房地产开发有限公司40%股权。转让价格以经评估的北海中信国安红树林房地产开发有限公司截至2015年9月30日的净资产值32,921.75万元为基础确定,为13,168.70万元。本次交易已构成关联交易。本次交易的实施将进一步完善公司以信息产业为核心的产业布局,有利于改善公司的资产结构,突出公司的主营优势,促进公司的持续快速发展。(相关公告刊登于2016年3月8日的《中国证券报》、《上海证券报》和《证券时报》)。	116.3046550724	40.0518709993	116.3037790724	40.0525239993	罗宁	卫星通讯、网络工程、信息传输、有线电视、移动通讯等。	3919826352	信息网络基础设施业务中的有线电视网、卫星通信网的投资建设,信息服务业中的增值电信服务、网络系统集成、应用软件开发,高科技产业中的新材料开发和生产,以及房地产开发和物业管理等业务。	guoan@citicguoaninfo.com		www.citicguoaninfo.com	CNE000000TD0
101284	000839	中信国安	2017-12-31	中信国安信息产业股份有限公司	电信、广播电视和卫星传输服务	I63	北京市海淀区上地东路5号院1号楼三层	北京市朝阳区关东店北街1号国安大厦五层	1997-10-14	1997-10-31	北京市	北京市	100020	张荣亮	010-65008037	010-65061482	zhangrl@citicguoaninfo.com	权博	911100001000278763	重大资产和股权出售:1、经2017年5月19日召开的公司第六届董事会第二十五次会议审议通过,公司控股子公司中信国安盟固利动力科技有限公司以增资扩股的方式引入战略投资者杭州普润新能股权投资合伙企业(有限合伙),扩股价格以盟固利动力截至2017年3月31日净资产评估值197,935.97万元为基础确定,经双方协商,扩股价格确定为8.91元/股,扩股额度为8,979万股,总金额为80,002.89万元,扩股后盟固利动力注册资本从22,222万元变更为31,201万元。扩股完成后,盟固利动力股权结构为:公司持有64.10%,杭州普润新能股权投资合伙企业(有限合伙)持有28.78%,北京融惟通投资管理合伙企业(有限合伙)持有7.12%。本次盟固利动力引入战略投资者,可进一步完善公司资产结构、降低资产负债率、优化公司财务状况,进一步加强盟固利动力生产经营能力、拓展市场、加快业务发展速度,为提高公司整…	116.4531841161	39.922393295	116.3037790724	40.0525239993	罗宁	卫星通讯、网络工程、信息传输、有线电视、移动通讯等。	3919826352	信息网络基础设施业务中的有线电视网、卫星通信网的投资建设,信息服务业中的增值电信服务、网络系统集成、应用软件开发,高科技产业中的新材料开发和生产,以及房地产开发和物业管理等业务。	guoan@citicguoaninfo.com		www.citicguoaninfo.com	CNE000000TD0
101857	000858	五粮液	2015-12-31	宜宾五粮液股份有限公司	酒、饮料和精制茶制造业	C15	四川省宜宾市翠屏区岷江西路150号	四川省宜宾市翠屏区岷江西路150号	1998-04-21	1998-04-27	四川省	宜宾市	644007	彭智辅	0831-3567000,3566939,3566938	0831-3555958	000858-wly@sohu.com	肖祥发	91511500MA62A0WM8P	报告期内公司无收购及出售资产、吸收合并事项	104.5940720409	28.7991871776	104.5940720409	28.7991871776	刘中国	酒类及相关辅助产品（瓶盖、商标、标识及包装制品）的生产经营。	3795966720	酒类产品及相关辅助产品（瓶盖、商标、标识及包装制品）的生 产经营。主要产品为“五粮液”及其系列白酒	000858-wly@sohu.com		www.wuliangye.com.cn	CNE000000VQ8
101857	000858	五粮液	2016-12-31	宜宾五粮液股份有限公司	酒、饮料和精制茶制造业	C15	四川省宜宾市翠屏区岷江西路150号	四川省宜宾市翠屏区岷江西路150号	1998-04-21	1998-04-27	四川省	宜宾市	644007	彭智辅	0831-3567000,3566938,3566937	0831-3555958	000858-wly@sohu.com	肖祥发	91511500MA62A0WM8P	报告期内公司无收购及出售资产、吸收合并事项	104.5940720409	28.7991871776	104.5940720409	28.7991871776	刘中国	酒类及相关辅助产品（瓶盖、商标、标识及包装制品）的生产经营。	3795966720	酒类产品及相关辅助产品(瓶盖、商标、标识及包装制品)的生产经营。主要产品为"五粮液"及其系列白酒	000858-wly@sohu.com		www.wuliangye.com.cn	CNE000000VQ8
101857	000858	五粮液	2017-12-31	宜宾五粮液股份有限公司	酒、饮料和精制茶制造业	C15	四川省宜宾市翠屏区岷江西路150号	四川省宜宾市翠屏区岷江西路150号	1998-04-21	1998-04-27	四川省	宜宾市	644007	彭智辅	0831-3567000,3566938,3566937	0831-3555958	000858-wly@sohu.com	肖祥发	91511500MA62A0WM8P	报告期内公司无收购及出售资产、吸收合并事项	104.5940720409	28.7991871776	104.5940720409	28.7991871776	刘中国	酒类及相关辅助产品（瓶盖、商标、标识及包装制品）的生产经营。	3795966720	酒类产品及相关辅助产品(瓶盖、商标、标识及包装制品)的生产经营。主要产品为“五粮液”及其系列白酒。	000858-wly@sohu.com		www.wuliangye.com.cn	CNE000000VQ8
101857	000858	五粮液	2018-12-31	宜宾五粮液股份有限公司	酒、饮料和精制茶制造业	C15	四川省宜宾市翠屏区岷江西路150号	四川省宜宾市翠屏区岷江西路150号	1998-04-21	1998-04-27	四川省	宜宾市	644007	彭智辅	0831-3567000,3566938,3567988	0831-3555958	000858-wly@sohu.com	肖祥发;李欣忆	91511500MA62A0WM8P	报告期内公司无收购及出售资产、吸收合并事项	104.5940720409	28.7991871776	104.5940720409	28.7991871776	刘中国	酒类及相关辅助产品（瓶盖、商标、标识及包装制品）的生产经营。	3881608005	酒类产品及相关辅助产品(瓶盖、商标、标识及包装制品)的生产经营。主要产品为“五粮液”及其系列白酒。	000858-wly@sohu.com		www.wuliangye.com.cn	CNE000000VQ8
101410	000876	新希望	2015-12-31	新希望六和股份有限公司	农副食品加工业	C13	四川省绵阳市国家高新技术产业开发区	四川省成都市锦江工业园区金石路376号	1998-03-04	1998-03-11	四川省	绵阳市	610063	向川	028-82000876	028-85950022	000876@newhope.cn	陈琳		报告期内公司无收购及出售资产、吸收合并事项	104.0900504697	30.5925008309	104.662750213	31.4660537074	刘畅	饲料、原料添加剂、饲料加工机械、农副产品、食品的生产、加工、销售。	2084117292	配合饲料、浓缩饲料、精料补充料的生产、加工（限分支机构经营）（以上项目及期限以许可证为准）。 一般经营项目（以下范围不含前置许可项目，后置许可项目凭许可证或审批文件经营）；谷物及其他作物的种植；牲畜的饲 养；猪的饲养；家禽的饲养；商品批发与零售；进出口业务；项目投资与管理；科技交流和推广服务业。 主要产品包括猪料、禽料、鱼料等；养殖行业主要产品包括种猪、商品猪、种鸡、种鸭、商品鸡等；屠 宰及肉制品行业主要产品包括生鲜及冷冻畜禽肉制品、熟肉制品等。	000876@newhope.cn		www.newhopeagri.com	CNE000000VB0
101410	000876	新希望	2016-12-31	新希望六和股份有限公司	农副食品加工业	C13	四川省绵阳市国家高新技术产业开发区	四川省成都市锦江工业园区金石路376号	1998-03-04	1998-03-11	四川省	绵阳市	610063	向川	028-85950011,82000876	028-85950022	000876@newhope.cn	白旭波	91510000709151981F	报告期内公司无收购及出售资产、吸收合并事项	104.0900504697	30.5925008309	104.662750213	31.4660537074	刘畅	饲料、原料添加剂、饲料加工机械、农副产品、食品的生产、加工、销售。	4168234584	配合饲料、浓缩饲料、精料补充料的生产、加工(限分支机构经营)(以上项目及期限以许可证为准)。一般经营项目(以下范围不含前置许可项目,后置许可项目凭许可证或审批文件经营):谷物及其他作物的种植;牲畜的饲养;猪的饲养;家禽的饲养;商品批发与零售;进出口业务;项目投资与管理;科技交流和推广服务业。公司饲料行业主要产品包括猪料、禽料、鱼料等;养殖行业主要产品包括种猪、商品猪、种鸡、种鸭、商品鸡等;屠宰及肉制品行业主要产品包括生鲜及冷冻畜禽肉制品、熟肉制品等。	000876@newhope.cn		www.newhopeagri.com	CNE000000VB0
101410	000876	新希望	2017-12-31	新希望六和股份有限公司	农副食品加工业	C13	四川省绵阳市国家高新技术产业开发区	四川省成都市锦江工业园区金石路376号	1998-03-04	1998-03-11	四川省	绵阳市	610063	向川	028-85950011,82000876	028-85950022	000876@newhope.cn	白旭波	91510000709151981F	报告期内公司无收购及出售资产、吸收合并事项	104.0900504697	30.5925008309	104.662750213	31.4660537074	刘畅	饲料、原料添加剂、饲料加工机械、农副产品、食品的生产、加工、销售。	4216015009	配合饲料、浓缩饲料、精料补充料的生产、加工(限分支机构经营)(以上项目及期限以许可证为准)。一般经营项目(以下范围不含前置许可项目,后置许可项目凭许可证或审批文件经营):谷物及其他作物的种植;牲畜的饲养;猪的饲养;家禽的饲养;商品批发与零售;进出口业务;项目投资与管理;科技交流和推广服务业。公司的主要产品公司饲料行业主要产品包括猪料、禽料、鱼料等;养殖行业主要产品包括种猪、商品猪、种鸡、种鸭、商品鸡等;屠宰及肉制品行业主要产品包括生鲜及冷冻畜禽肉制品、熟肉制品等。	000876@newhope.cn		www.newhopeagri.com	CNE000000VB0
101410	000876	新希望	2018-12-31	新希望六和股份有限公司	农副食品加工业	C13	四川省绵阳市国家高新技术产业开发区	四川省成都市锦江工业园区金石路376号	1998-03-04	1998-03-11	四川省	绵阳市	610063	胡吉	010-53299899	010-53299898	000876@newhope.cn	白旭波	91510000709151981F	报告期内公司无收购及出售资产、吸收合并事项	104.0900504697	30.5925008309	104.662750213	31.4660537074	刘畅	饲料、原料添加剂、饲料加工机械、农副产品、食品的生产、加工、销售。	4216015009	配合饲料、浓缩饲料、精料补充料的生产、加工(限分支机构经营)(以上项目及期限以许可证为准)。一般经营项目(以下范围不含前置许可项目,后置许可项目凭许可证或审批文件经营):谷物及其他作物的种植;牲畜的饲养;猪的饲养;家禽的饲养;商品批发与零售;进出口业务;项目投资与管理;科技交流和推广服务业。主要产品包括猪料、禽料、鱼料等;猪产业主要产品包括种猪、商品猪;禽产业主要种禽、商品禽、禽屠宰等;食品主要包括畜屠宰、肉制品深加工、中央厨房等。	000876@newhope.cn		www.newhopeagri.com	CNE000000VB0
101370	000883	湖北能源	2015-12-31	湖北能源集团股份有限公司	电力、热力生产和供应业	D44	湖北省武汉市徐东大街96号	湖北省武汉市洪山区徐东大街137号	1993-03-09	1998-05-19	湖北省	武汉市	430063	周江	027-86606100	027-86606109	zq@hbny.com.cn	王军涛		报告期内公司无收购及出售资产、吸收合并事项	114.3563220129	30.5809176654	114.3483234096	30.5853910725	肖宏江	能源投资、开发与管理。	6507449486	能源投资、开发与管理；国家政策允许范围内的其他经营业务（法律、 行政法规或国务院决定需许可经营的除外）。	zq@hbny.com.cn		www.hbny.com.cn	CNE000000750
101355	000895	双汇发展	2015-12-31	河南双汇投资发展股份有限公司	农副食品加工业	C13	河南省漯河市双汇路1号双汇大厦	河南省漯河市双汇路1号双汇大厦	1998-10-15	1998-12-10	河南省	漯河市	462000	张立文	0395-2676158	0395-2693259	0895@shuanghui.net			报告期内公司无收购及出售资产、吸收合并事项	114.0599611005	33.5639070521	114.0600261005	33.5636900521	万隆	食品加工及销售，生物工程，畜牧养殖，化工、包装制品的生产与销售。	3300867672	畜禽屠宰，加工销售肉类食品、肉类罐头、速冻肉制品、定型包装熟肉制品(含清真食品)、实用动物油脂(猪油)；生猪养殖、销售；生产销售PVDC薄膜及食品包装材料、其他包装材料制品；猪肠衣(盐渍猪肠衣)及其附属产品的加工、销售；医药中间体(肝素钠)的提取、销售；农副产品收购，生产加工肉制品及相关产品配套原辅料、调味料、食品添加剂、复配食品添加剂；蛋制品销售，技术咨询服务，仓储服务，化工产品销售(不含易燃易爆危险品)，食品行业的投资，销售代理，相关经营业务的配套服务。	0895@shuanghui.net		www.shuanghui.net	CNE000000XM3
101355	000895	双汇发展	2016-12-31	河南双汇投资发展股份有限公司	农副食品加工业	C13	河南省漯河市双汇路1号双汇大厦	河南省漯河市双汇路1号双汇大厦	1998-10-15	1998-12-10	河南省	漯河市	462000	张立文	0395-2676158	0395-2693259	0895@shuanghui.net	黄志强	9141000070678701XL	报告期内公司无收购及出售资产、吸收合并事项	114.0599611005	33.5639070521	114.0600261005	33.5636900521	万隆	食品加工及销售，生物工程，畜牧养殖，化工、包装制品的生产与销售。	3299558284	畜禽屠宰,加工销售肉类食品、肉类罐头、速冻肉制品、定型包装熟肉制品(含清真食品)、食用动物油脂(猪油);生猪养殖、销售;生产销售PVDC薄膜及食品包装材料、其他包装材料制品;猪肠衣(盐渍猪肠衣)及其附属产品的加工、销售;医药中间体(肝素钠)的提取、销售;农副产品收购,生产加工肉制品及相关产品配套原辅料、调味料、食品添加剂、复配食品添加剂;蛋制品销售,技术咨询服务,仓储服务,化工产品销售(不含易燃易爆危险品),食品行业的投资,销售代理,相关经营业务的配套服务。	0895@shuanghui.net		www.shuanghui.net	CNE000000XM3
101355	000895	双汇发展	2017-12-31	河南双汇投资发展股份有限公司	农副食品加工业	C13	河南省漯河市双汇路1号双汇大厦	河南省漯河市双汇路1号双汇大厦	1998-10-15	1998-12-10	河南省	漯河市	462000	张立文	0395-2676158	0395-2693259	0895@shuanghui.net	黄志强	9141000070678701XL	报告期内公司无收购及出售资产、吸收合并事项	114.0599611005	33.5639070521	114.0600261005	33.5636900521	万隆	食品加工及销售，生物工程，畜牧养殖，化工、包装制品的生产与销售。	3299558284	畜禽屠宰,加工销售肉类食品、肉类罐头、速冻肉制品、定型包装熟肉制品(含清真食品)、食用动物油脂(猪油);生猪养殖、销售;生产销售PVDC薄膜及食品包装材料、其他包装材料制品;猪肠衣(盐渍猪肠衣)及其附属产品的加工、销售;医药中间体(肝素钠)的提取、销售;农副产品收购,生产加工肉制品及相关产品配套原辅料、调味料、食品添加剂、复配食品添加剂;蛋制品销售,技术咨询服务,仓储服务,化工产品销售(不含易燃易爆危险品),食品行业的投资,销售代理及相关经营业务的配套服务。	0895@shuanghui.net		www.shuanghui.net	CNE000000XM3
101355	000895	双汇发展	2018-12-31	河南双汇投资发展股份有限公司	农副食品加工业	C13	河南省漯河市双汇路1号双汇大厦	河南省漯河市双汇路1号双汇大厦	1998-10-15	1998-12-10	河南省	漯河市	462000	张立文	0395-2676158	0395-2693259	0895@shuanghui.net	张霄	9141000070678701XL	报告期内公司无收购及出售资产、吸收合并事项	114.0599611005	33.5639070521	114.0600261005	33.5636900521	万隆	食品加工及销售，生物工程，畜牧养殖，化工、包装制品的生产与销售。	3299558284	畜禽屠宰,加工销售肉类食品、肉类罐头、速冻肉制品、定型包装熟肉制品(含清真食品)、食用动物油脂(猪油);生猪养殖、销售;生产销售PVDC薄膜及食品包装材料、其他包装材料制品;猪肠衣(盐渍猪肠衣)及其附属产品的加工、销售;医药中间体(肝素钠)的提取、销售;农副产品收购,生产加工肉制品及相关产品配套原辅料、调味料、食品添加剂、复配食品添加剂;蛋制品销售,技术咨询服务,仓储服务,化工产品销售(不含易燃易爆危险品),食品行业的投资,销售代理及相关经营业务的配套服务。	0895@shuanghui.net		www.shuanghui.net	CNE000000XM3
101969	000898	鞍钢股份	2015-12-31	鞍钢股份有限公司	黑色金属冶炼及压延加工业	C31	辽宁省鞍山市铁西区鞍钢厂区	辽宁省鞍山市铁西区鞍钢厂区	1997-05-08	1997-07-24	辽宁省	鞍山市	114021	张景凡	0412-6734878	0412-6727772,00852-25987500	zhangjf@ansteel.com.cn;seaman.kwok@boardroomlimited.com	靳毅民	912100002426694799	出售重大股权情况： 交易对方：西昌钢钒 被出售股权：将本公司所持有的重庆汽车钢50%股权转让给西昌钢钒 出售日：2015年5月31日 交易价格（人民币万元）：5,156 本期初起至出售日该股权为上市公司贡献的净利润（人民币万元）：156 出售对公司的影响：增加公司利润156 万元，对公司整体经营成果与财务状况无重大影响。 股权出售为上市公司贡献的净利润占净利润总额的比例：0.03% 股权出售定价原则：按评估值定价 是否为关联交易：是 与交易对方的关联关系（适用关联交易情形）：与本公司间接受同一控股股东控制 所涉及的股权是否已全部过户：是 是否按计划如期实施：是 披露日期：2015年4月28日 披露索引：《中国证券报》、《证券时报》和巨潮资讯网www.cninfo.com.cn	122.9700845571	41.1286652277	123.0019809576	41.1559972978	姚林	生产销售冷轧薄板、线材及宽厚板。	7234807847	黑色金属冶炼及钢压延加工	ansteel@ansteel.com.cn	00347	www.ansteel.com.cn	CNE000000SQ4
101969	000898	鞍钢股份	2016-12-31	鞍钢股份有限公司	黑色金属冶炼及压延加工业	C31	辽宁省鞍山市铁西区鞍钢厂区	辽宁省鞍山市铁西区鞍钢厂区	1997-05-08	1997-07-24	辽宁省	鞍山市	114021	张景凡;郭兆文	0412-6734878,00852-25046911	0412-6727772,00852-25987500	zhangjf@ansteel.com.cn;seaman.kwok@boardroomlimited.com	靳毅民	912100002426694799	出售重大资产情况:交易对方:鞍山钢铁;被出售资产:电渣重熔相关资产;出售日:2016年12月29日;交易价格(人民币百万元):126.57;本期初起至出售日该资产为上市公司贡献的净利润(人民币百万元):2;出售对公司的影响:联交易有利于理顺经营管理,减少关;资产出售为上市公司贡献的净利润占净利润总额的比例(%):0.12;资产出售定价原则:价格按评估值确定交易;是否为关联交易:是;与交易对方的关联关系(适用关联交易情形:本公司的控股股东;所涉及的资产产权是否已全部过户:是;所涉及的债权债务是否已全部过户:是;是否按计划如期实施:是;披露日期:2016年12月30日;披露索引:讯网《中国证券报》或巨潮资	122.9700845571	41.1286652277	123.0019809576	41.1559972978	姚林	生产销售冷轧薄板、线材及宽厚板。	7235000000	黑色金属冶炼及钢压延加工。	ansteel@ansteel.com.cn	00347	www.ansteel.com.cn	CNE000000SQ4
101969	000898	鞍钢股份	2017-12-31	鞍钢股份有限公司	黑色金属冶炼及压延加工业	C31	辽宁省鞍山市铁西区鞍钢厂区	辽宁省鞍山市铁西区鞍钢厂区	1997-05-08	1997-07-24	辽宁省	鞍山市	114021	马连勇	0412-6734878	0412-6727772	mly@ansteel.com.cn	靳毅民	912100002426694799	报告期内公司无收购及出售资产、吸收合并事项	122.9700845571	41.1286652277	123.0019809576	41.1559972978	王义栋	生产销售冷轧薄板、线材及宽厚板。	7235000000	黑色金属冶炼及钢压延加工。	ansteel@ansteel.com.cn	00347	www.ansteel.com.cn	CNE000000SQ4
101969	000898	鞍钢股份	2018-12-31	鞍钢股份有限公司	黑色金属冶炼及压延加工业	C31	辽宁省鞍山市铁西区鞍钢厂区	辽宁省鞍山市铁西区鞍钢厂区	1997-05-08	1997-07-24	辽宁省	鞍山市	114021	马连勇	0412-6734878	0412-6727772	mly@ansteel.com.cn	靳毅民	912100002426694799	报告期内公司无收购及出售资产、吸收合并事项	122.9700845571	41.1286652277	123.0019809576	41.1559972978	王义栋	生产销售冷轧薄板、线材及宽厚板。	7235000000	黑色金属冶炼及钢压延加工。	ansteel@ansteel.com.cn	00347	www.ansteel.com.cn	CNE000000SQ4
101642	000917	电广传媒	2015-12-31	湖南电广传媒股份有限公司	电信、广播电视和卫星传输服务	I63	湖南省长沙市浏阳河大桥东湖南金鹰影视文化城	湖南省长沙市浏阳河大桥东湖南金鹰影视文化城	1999-01-26	1999-03-25	湖南省	长沙市	410003	廖朝晖	0731-84252333-8371	0731-84252096	dgcm@tik.com.cn	汤振羽		报告期内公司无收购及出售资产、吸收合并事项	113.0467191994	28.2364436809	113.0440017029	28.2350989946	陈刚	策划、设计、制作、代理、发布国内外各类广告；影视节目制作、发行和销售；电子商务、网络及信息传播服务；法律、法规允许的产业投资、创业投资、股权投资和资本管理。	1417556338	影视节目制作、发行、销售（分支机构凭 许可证书在有效期内经营）；广告策划；设计、制作、发布、代理国内外各类广告；电子商务、有线电视 网络及信息传播服务，旅游、文化娱乐、餐饮服务、贸易业投资，产业投资、创业投资和资本管理（以上 法律法规禁止和限制的除外）。	directorate@tik.com.cn		www.tik.com.cn	CNE000000YB4
101642	000917	电广传媒	2016-12-31	湖南电广传媒股份有限公司	电信、广播电视和卫星传输服务	I63	湖南省长沙市浏阳河大桥东	湖南省长沙市金鹰影视文化城	1999-01-26	1999-03-25	湖南省	长沙市	410003	汤振羽	0731-84252080	0731-84252096	dgcm@tik.com.cn	吴瑛	91430000712106217Q	报告期内公司无收购及出售资产、吸收合并事项	112.9862261727	28.2558913785	113.0598452415	28.1916126518	龙秋云	策划、设计、制作、代理、发布国内外各类广告；影视节目制作、发行和销售；电子商务、网络及信息传播服务；法律、法规允许的产业投资、创业投资、股权投资和资本管理。	1417556338	影视节目制作、发行、销售(分支机构凭许可证书在有效期内经营);广告策划;设计、制作、发布、代理国内外各类广告;电子商务、有线电视网络及信息传播服务,旅游、文化娱乐、餐饮服务、贸易业投资,产业投资、创业投资和资本管理(以上法律法规禁止和限制的除外)。	directorate@tik.com.cn		www.tik.com.cn	CNE000000YB4
101314	000938	紫光股份	2016-12-31	紫光股份有限公司	计算机、通信和其他电子设备制造业	C39	北京市海淀区清华大学紫光大楼	北京市海淀区清华大学紫光大楼	1999-03-18	1999-11-04	北京市	北京市	100084	张蔚	010-62770008	010-62770880	zw@thunis.com	葛萌	91110000700218641X	报告期内公司无收购及出售资产、吸收合并事项	116.3320295921	39.9955728446	116.3318535921	39.9951498446	赵伟国	以扫描仪为核心的计算机业务，软件开发及销售业务等。	1042303162	硬件方面提供智能网络设备、存储系统、全系列服务器等为主的面向未来计算架构的先进装备。软件方面提供从桌面端到移动端的各重点行业的应用软件解决方案。技术服务方面涵盖信息化技术咨询、信息化基础设施解决方案和支持服务。	thunis@unis.cn		www.thunis.com	CNE0000010T1
101314	000938	紫光股份	2017-12-31	紫光股份有限公司	计算机、通信和其他电子设备制造业	C39	北京市海淀区清华大学紫光大楼	北京市海淀区清华大学紫光大楼	1999-03-18	1999-11-04	北京市	北京市	100084	张蔚	010-62770008	010-62770880	zw@thunis.com	葛萌	91110000700218641X	报告期内公司无收购及出售资产、吸收合并事项	116.3320295921	39.9955728446	116.3318535921	39.9951498446	于英涛	以扫描仪为核心的计算机业务，软件开发及销售业务等。	1042303162	公司结合全球信息产业的发展趋势及自身优势业务的特点,将公司战略聚焦于IT服务领域,致力于打造一条完整而强大的“云—网—端”产业链,向云计算、移动互联网和大数据处理等信息技术的行业应用领域全面深入,并成为集现代信息系统研发、建设、运营、维护于一体的全产业链服务提供商。目前,公司的核心业务基本覆盖IT服务的重要领域:硬件方面提供智能网络设备、存储系统、全系列服务器等为主的面向未来计算架构的先进装备。软件方面提供从桌面端到移动端的各重点行业的应用软件解决方案。技术服务方面涵盖信息化技术咨询、信息化基础设施解决方案和支持服务。软硬件产品和服务都在紫光股份领先的顶层设计中得到有效整合,使信息化系统展现出最优化、完整一体的运行效果。公司有能力为任何大型客户的信息化需求提供完整、领先的IT服务和解决方案。	thunis@unis.cn		www.thunis.com	CNE0000010T1
101314	000938	紫光股份	2018-12-31	紫光股份有限公司	计算机、通信和其他电子设备制造业	C39	北京市海淀区清华大学紫光大楼	北京市海淀区清华大学紫光大楼	1999-03-18	1999-11-04	北京市	北京市	100084	张蔚	010-62770008	010-62770880	zw@thunis.com	葛萌	91110000700218641X	报告期内公司无收购及出售资产、吸收合并事项	116.3320295921	39.9955728446	116.3318535921	39.9951498446	于英涛	以扫描仪为核心的计算机业务，软件开发及销售业务等。	1459224426	公司结合全球信息产业的发展趋势及自身优势业务的特点,将公司战略聚焦于IT服务领域,致力于打造一条完整而强大的“云—网—端”产业链,向云计算、移动互联网和大数据处理等信息技术的行业应用领域全面深入,并成为集现代信息系统研发、建设、运营、维护于一体的全产业链服务提供商。目前,公司的核心业务基本覆盖IT服务的重要领域:硬件方面提供智能网络设备、存储系统、全系列服务器等为主的面向未来计算架构的先进装备。软件方面提供从桌面端到移动端的各重点行业的应用软件解决方案。技术服务方面涵盖信息化技术咨询、信息化基础设施解决方案和支持服务。	thunis@unis.cn		www.thunis.com	CNE0000010T1
101421	000959	首钢股份	2017-12-31	北京首钢股份有限公司	黑色金属冶炼及压延加工业	C31	北京市石景山区石景山路	北京市石景山路99号	1999-10-15	1999-12-16	北京市	北京市	100041	陈益	010-88293727	010-68873028	Chenyi@shougang.com.cn		911100007002343182	报告期内公司无收购及出售资产、吸收合并事项	116.1834740428	39.9075222361	116.1931727507	39.9084350773	赵民革	钢铁冶炼，钢压延加工；铜冶炼及压延 加工、销售烧结矿、焦炭、焦炭、化工产品制造、销售。	5289389600	钢铁冶炼、钢压延加工,铜冶炼及压延加工、销售;烧结矿、焦炭、化工产品制造、销售;高炉余压发电及煤气生产、销售;工业生产废异物加工、销售;技术开发、技术咨询、技术转让、技术服务、技术培训;销售金属材料、焦炭、化工产品、机械电器设备、建筑材料;设备租赁(汽车除外);仓储服务;投资及投资管理。	sggf@sgqg.com		www.sggf.com.cn	CNE000001196
101488	000961	中南建设	2017-12-31	江苏中南建设集团股份有限公司	土木工程建筑业	E48	江苏省海门市常乐镇	江苏省海门市上海路899号	1998-07-28	2000-03-01	江苏省	海门市	226100	张伟	0513-68702888	0513-68702889	zhongnanconstruction@zhongnangroup.cn		91320600MA1M9AEW6B	出售重大股权情况:交易对方:深圳市和润达投资有限公司;被出售股权:中南(深圳)房地产开发有限公司47%股权;出售日:2017年11月11日;交易价格(万元):48,692;本期初起至出售日该股权为上市公司贡献的净利润(万元):-336.99;出售对公司的影响:增加合并报表投资收益52174万元;股权出售为上市公司贡献的净利润占净利润总额的比例:86.12%;股权出售定价原则:协商定价;是否为关联交易:否;与交易对方的关联关系:无;所涉及的股权是否已全部过户:是;是否按计划如期实施,如未按计划实施,应当说明原因及公司已采取的措施:是	121.2517296291	31.9298095192	121.2517866291	31.9297345192	陈锦石	房地产开发销售。	3709788797	房地产开发、销售(凭资质证书承接业务);土木建筑工程施工,物业管理,实业投资。(依法须经批准的项目,经相关部门批准后方可开展经营活动)。	zhongnanconstruction@zhongnangroup.cn		www.zhongnanconstruction.cn	CNE0000011P7
101488	000961	中南建设	2018-12-31	江苏中南建设集团股份有限公司	房地产业	K70	江苏省海门市常乐镇	上海市长宁区天山西路1068号A栋9楼	1998-07-28	2000-03-01	江苏省	海门市	200335	梁洁	0513-68702888	021-61929733	zhongnanconstruction@zhongnangroup.cn		91320600MA1M9AEW6B	报告期内公司无收购及出售资产、吸收合并事项	121.3543195186	31.2202571083	121.2517866291	31.9297345192	陈锦石	房地产开发销售。	3709788797	房地产开发、销售(凭资质证书承接业务);土木建筑工程施工,物业管理,实业投资。(依法须经批准的项目,经相关部门批准后方可开展经营活动)。	zhongnanconstruction@zhongnangroup.cn		www.zhongnangroup.cn	CNE0000011P7
101490	000963	华东医药	2015-12-31	华东医药股份有限公司	零售业	F52	浙江省杭州市延安路468号1号楼1号门9,10楼	浙江省杭州市莫干山路866号	1993-03-31	2000-01-27	浙江省	杭州市	310011	陈波	0571-89903300	0571-89903300	hz000963@126.com	谢丽红		报告期内公司无收购及出售资产、吸收合并事项	120.1074009141	30.3250296278	120.1646526314	30.2651092308	李邦良	药品、中药材、中成药、医疗器械、化学试剂、玻璃仪器等六大类医药商品。	486058208	药品的生产、销售。	hz000963@126.com		www.eastchinapharm.com	CNE0000011S1
101490	000963	华东医药	2016-12-31	华东医药股份有限公司	零售业	F52	浙江省杭州市延安路468号1号楼1号门9、10楼	浙江省杭州市莫干山路866号	1993-03-31	2000-01-27	浙江省	杭州市	310011	陈波	0571-89903300	0571-89903300	hz000963@126.com	谢丽红	91330000143083157E	报告期内公司无收购及出售资产、吸收合并事项	120.1074009141	30.3250296278	120.1646526314	30.2651092308	李邦良	药品、中药材、中成药、医疗器械、化学试剂、玻璃仪器等六大类医药商品。	666961416	药品的生产、销售。	hz000963@126.com		www.eastchinapharm.com	CNE0000011S1
101490	000963	华东医药	2017-12-31	华东医药股份有限公司	零售业	F52	浙江省杭州市延安路468号1号楼1号门9、10楼	浙江省杭州市莫干山路866号	1993-03-31	2000-01-27	浙江省	杭州市	310011	陈波	0571-89903300	0571-89903300	hz000963@126.com	谢丽红	91330000143083157E	报告期内公司无收购及出售资产、吸收合并事项	120.1074009141	30.3250296278	120.1646526314	30.2651092308	李邦良	药品、中药材、中成药、医疗器械、化学试剂、玻璃仪器等六大类医药商品。	972116416	药品的生产、销售。	hz000963@126.com		www.eastchinapharm.com	CNE0000011S1
101490	000963	华东医药	2018-12-31	华东医药股份有限公司	零售业	F52	浙江省杭州市延安路468号1号楼1号门9、10楼	浙江省杭州市莫干山路866号	1993-03-31	2000-01-27	浙江省	杭州市	310011	陈波	0571-89903300	0571-89903300	hz000963@126.com	谢丽红	91330000143083157E	报告期内公司无收购及出售资产、吸收合并事项	120.1074009141	30.3250296278	120.1646526314	30.2651092308	李邦良	药品、中药材、中成药、医疗器械、化学试剂、玻璃仪器等六大类医药商品。	1458174624	药品的生产、销售。	hz000963@126.com		www.eastchinapharm.com	CNE0000011S1
101305	000977	浪潮信息	2016-12-31	浪潮电子信息产业股份有限公司	计算机、通信和其他电子设备制造业	C39	山东省济南市浪潮路1036号	山东省济南市浪潮路1036号	1998-10-28	2000-06-08	山东省	济南市	250101	李丰	0531-85106229	0531-87176000-6222	lclifeng@inspur.com	刘荣亚	91370000706266601D	出售重大股权情况:交易对方:二级市场;被出售股权:东港股份;出售日:2016年1-6月;交易价格(万元):24,233.55;本期初起至出售日该股权为上市公司贡献的净利润(万元):152.25;出售对公司的影响:17,575.46;股权出售为上市公司贡献的净利润占净利润总额的比例:62.23%;股权出售定价原则:市场价格;是否为关联交易:否;与交易对方的关联关系:非关联方;所涉及的股权是否已全部过户:是;是否按计划如期实施,如未按计划实施,应当说明原因及公司已采取的措施:是;披露日期:2016年06月25日;披露索引:刊登于《中国证券报》、《证券时报》、《上海证券报》及巨潮资讯网(www.cninfo.com.cn)公告编号为:2016-029的《关于减持东港股份股票的公告》	117.1268529654	36.661916295	117.1273579654	36.661872295	张磊	计算机硬件、软件及系统集成的开发、生产、销售。	999282714	计算机及软件、电子产品及其他通信设备(不含无线电发射设备)、商业机具、电子工业用控制设备、空调数控装置、电子计时器、电控玩具、教学用具的开发、生产、销售;技术信息服务、计算机租赁业务;电器设备的安装与维修及技术服务;批准范围内的自营进出口业务,房屋租赁。	000977@inspur.com		www.inspur.com	CNE0000012M2
101211	000983	西山煤电	2015-12-31	山西西山煤电股份有限公司	煤炭开采和洗选业	B06	山西省太原市西矿街318号	山西省太原市西矿街318号西山大厦	1999-04-26	2000-07-26	山西省	太原市	030053	支亚毅	0351-6137052	0351-6127434	zqb000983@163.com	王晶莹	91140000713676510D	报告期内公司无收购及出售资产、吸收合并事项	112.4582639395	37.8538667331	112.4588959395	37.8529147331	王玉宝	煤炭生产、销售、洗选加工、发供电等。	3151200000	煤 炭生产、洗选加工、电力生产及销售；矿山开发及设计施工；矿用电力器材生产、经营。	xsstock@public.ty.sx.cn		www.xsmd.com.cn	CNE0000013Y5
101211	000983	西山煤电	2016-12-31	山西西山煤电股份有限公司	煤炭开采和洗选业	B06	山西省太原市西矿街318号	山西省太原市西矿街318号	1999-04-26	2000-07-26	山西省	太原市	030053	支亚毅	0351-6217296	0351-6127282	zqb000983@163.com	王晶莹	91140000713676510D	报告期内公司无收购及出售资产、吸收合并事项	112.4582639395	37.8538667331	112.4588959395	37.8529147331	王玉宝	煤炭生产、销售、洗选加工、发供电等。	3151200000	煤炭生产、洗选加工、电力生产及销售;矿山开发及设计施工;矿用电力器材生产、经营。	xsstock@public.ty.sx.cn		www.xsmd.com.cn/web/shangShiGongSi	CNE0000013Y5
101211	000983	西山煤电	2017-12-31	山西西山煤电股份有限公司	煤炭开采和洗选业	B06	山西省太原市西矿街318号	山西省太原市西矿街318号	1999-04-26	2000-07-26	山西省	太原市	030053	黄振涛	0351-6211511	0351-6217282	zqb000983@163.com	王晶莹	91140000713676510D	报告期内公司无收购及出售资产、吸收合并事项	112.4582639395	37.8538667331	112.4588959395	37.8529147331	王玉宝	煤炭生产、销售、洗选加工、发供电等。	3151200000	煤炭销售、洗选加工;发供电;电力采购与销售;电力设施承运承修;电力设备及配件的销售;设备清洗;保洁服务;技术开发、技术转让、技术咨询;化验;机电修理;材料加工;节能改造;新能源管理;矿山开发设计施工;矿用及电力器材生产经营;煤炭开采(仅限分支机构)。(依法须经批准的项目,经相关部门批准后方可开展经营活动)。	xsstock@public.ty.sx.cn		www.xsmd.com.cn/web/shangShiGongSi	CNE0000013Y5
101438	000999	华润三九	2015-12-31	华润三九医药股份有限公司	医药制造业	C27	深圳市龙华新区观澜高新园区观清路1号	广东省深圳市龙华新区观澜高新园区观清路1号	1999-04-21	2000-03-09	广东省	深圳市	518110	周辉	0755-83360999-393236,393042	0755-83360999-396006	000999@999.com.cn	余亮	914403007109245909	报告期内公司无收购及出售资产、吸收合并事项	114.0578370715	22.685826739	114.0582960715	22.686305739	王春城	营养滋补品及食品、生物食品、医疗器械、日用化妆品、服装、塑料制品、玩具、家电购销业务。	978900000	医药产品的研发、生产、销售及相关健康服务。本集团主要产品包括:999感冒灵、999皮炎平、参附注射液、注射用头孢、免煎中药、三九胃泰颗粒、正天丸等。	000999@999.com.cn		www.999.com.cn	CNE0000011K8
10103780	001979	招商蛇口	2015-12-31	招商局蛇口工业区控股股份有限公司	房地产业	K70	广东省深圳市南山区蛇口太子路1号新时代广场	广东省深圳市南山区蛇口太子路1号新时代广场	1979-01-31	2015-12-30	广东省	深圳市	518054	刘宁	0755-26819600	0755-26818666	cmskir@cmhk.com	陈江	914400001000114606	出售重大股权情况：为实现对深圳蛇口“南海意库梦工场”的整体销售，本公司之子公司深圳招商理财服务有限公司（以下简称“招商理财”）、 深圳招商商置投资有限公司（以下简称“招商商置”）拟向栢艺投资有限公司（以下简称“栢艺投资”）转让其各自持有的深 圳金域融泰投资发展有限公司（以下简称“金域融泰”）50%股权，股权转让对价总额为204,678.92 万元。截止报告期末， 招商商置、招商理财与栢艺投资已签署《股权转让协议》并收到股权转让定金共计50,000 万元。因部分股权转让条件尚未 满足，报告期内股权交易未完成。公司与栢艺投资的实际控制人均为招商局集团，上述交易构成关联交易并已履行相关审批 程序，因交易未完成，故未作为本年度关联交易披露。	113.91306135	22.48223764	113.91251135	22.48206864	孙承铭	园区开发与运营业务、社区开发与运营业务、邮轮产业建设与运营业务。	7904092722	城区、园区、社区的投资、开发建设和运营；交通运输、工 业制造、金融保险、对外贸易、邮电通讯、旅游、文艺演出、有线广播电视业务、酒店和 其他各类企业的投资和管理；邮轮产业及配套设施的建设和运营；房地产开发经营；水陆 建筑工程；所属企业产品的销售和所需设备、原材料、零配件的供应和销售；举办体育比 赛；物业管理；水上运输，码头、仓储服务；科研技术服务；互联网信息服务，数据处理； 提供与上述业务有关的技术、经营、法律咨询和技术、信息服务；因特网接入服务业务。	cmskir@cmhk.com		www.cmsk1979.com	CNE100002FC6
10103780	001979	招商蛇口	2016-12-31	招商局蛇口工业区控股股份有限公司	房地产业	K70	广东省深圳市南山区蛇口太子路1号新时代广场	广东省深圳市南山区蛇口兴华路6号南海意库3号楼	1979-01-31	2015-12-30	广东省	深圳市	518067	刘宁	0755-26819600	0755-26818666	cmskir@cmhk.com	陈江	914400001000114606	出售重大股权情况:交易对方:栢艺投资有限公司;招商局港口发展(深圳有限公司;胜联投资有限公司;胜联投资有限公司;被出售股权:深圳金域融泰投资发展有限公司;深圳市招商前海湾置业有限公司;高立企业有限公司;长诚企业有限公司;出售日:2016年6月30日;2016年12月31日;2017年2月17日;2017年2月17日;交易价格(万元):204,678.92252,847.28;276,361.81;205,890.66;本期初起至出售日该股权贡献的净润(万元):9.11;1,090.67;0.00;0.00;出售对公司的影响:实现投资收益12.81亿元;实现投资收益23.28亿元;预计实现投资收益14.09亿元;预计实现投资收益10.50亿元;股权出售贡献的净利润占净利润总额的比例:7.95%;14.32%;0.00%;0.00%;股权出售定价原则:按评估价确定;按评估价确定;按评估价确定…	113.91306135	22.48223764	113.91251135	22.48206864	孙承铭	园区开发与运营业务、社区开发与运营业务、邮轮产业建设与运营业务。	7904092722	城区、园区、社区的投资、开发建设和运营;交通运输、工业制造、金融保险、对外贸易、邮电通讯、旅游、文艺演出、有线广播电视业务、酒店和其他各类企业的投资和管理;邮轮产业及配套设施的建设和运营;房地产开发经营;水陆建筑工程;所属企业产品的销售和所需设备、原材料、零配件的供应和销售;举办体育比赛;物业管理;水上运输,码头、仓储服务;科研技术服务;互联网信息服务,数据处理;提供与上述业务有关的技术、经营、法律咨询和技术、信息服务;因特网接入服务业务。	cmskir@cmhk.com		www.cmsk1979.com	CNE100002FC6
10103780	001979	招商蛇口	2017-12-31	招商局蛇口工业区控股股份有限公司	房地产业	K70	广东省深圳市南山区蛇口太子路1号新时代广场	广东省深圳市南山区蛇口兴华路6号南海意库3号楼	1979-01-31	2015-12-30	广东省	深圳市	518067	刘宁	0755-26819600	0755-26818666	cmskir@cmhk.com	陈江	914400001000114606	出售重大股权情况:交易对方:胜联投资有限公司;胜联投资有限公司;SUPER ALLIANCE REAL ESTATE PARTNERS L.P.;交易对方被出售股权:高立企业有限公司;长诚企业有限公司;京沪三项资产;出售日:2017年2月15日;2017年2月15日;-;交易价格(万元):276,361.81;205,890.66;501,500.00;本期初起至出售日该股权为上市公司贡献的净利润(万元):0;0;0;出售对公司的影响:实现投资收益13.86亿元;实现投资收益10.32亿元;截至报告期末尚未完成股权转让交易;股权出售为上市公司贡献的净利润占净利润总额的比例:0.0553;0.0743;0;股权出售定价原则:按评估价确定;按评估价确定;按评估价确定;是否为关联交易:否;否;否;与交易对方的关联关系:联营公司;联营公司;合营公司;所涉及的股权是否已全部过户:是;是;是;是否按…	113.91306135	22.48223764	113.91251135	22.48206864	孙承铭	园区开发与运营业务、社区开发与运营业务、邮轮产业建设与运营业务。	7904092722	城区、园区、社区的投资、开发建设和运营;交通运输、工业制造、金融保险、对外贸易、旅游、酒店和其他各类企业的投资和管理;邮轮母港及配套设施的建设和运营;房地产开发经营;水陆建筑工程;所属企业产品的销售和所需设备、原材料、零配件的供应和销售;举办体育比赛;物业管理;水上运输、码头、仓储服务;科研技术服务;提供与上述业务有关的技术、经营咨询和技术、信息服务。	cmskir@cmhk.com		www.cmsk1979.com	CNE100002FC6
10103780	001979	招商蛇口	2018-12-31	招商局蛇口工业区控股股份有限公司	房地产业	K70	广东省深圳市南山区蛇口太子路1号新时代广场	广东省深圳市南山区蛇口兴华路6号南海意库3号楼	1979-01-31	2015-12-30	广东省	深圳市	518067	刘宁	0755-26819600	0755-26818666	cmskir@cmhk.com	陈江	914400001000114606	出售重大股权情况:交易对方:SUPER ALLIANCE REAL ESTATE PARTNERS L.P.;被出售股权:京沪三项资产;出售日:2018年3月31日;交易价格(万元):455660.51;本期初起至出售日该股权为上市公司贡献的净利润(万元):492.68;出售对公司的影响:实现投资收益35.09亿元;股权出售为上市公司贡献的净利润占净利润总额的比例:15.29%;股权出售定价原则:按评估价确定;是否为关联交易:否;与交易对方的关联关系:合营公司;所涉及的股权是否已全部过户:是;是否按计划如期实施:是;披露日期:43067;披露索引:巨潮资讯网	113.91687035	22.48684153	113.91251135	22.48206864	孙承铭	园区开发与运营业务、社区开发与运营业务、邮轮产业建设与运营业务。	7904092722	城区、园区、社区的投资、开发建设和运营;交通运输、工业制造、金融保险、对外贸易、旅游、酒店和其他各类企业的投资和管理;邮轮母港及配套设施的建设和运营;房地产开发经营;水陆建筑工程;所属企业产品的销售和所需设备、原材料、零配件的供应和销售;举办体育比赛;物业管理;水上运输、码头、仓储服务;科研技术服务;提供与上述业务有关的技术、经营咨询和技术、信息服务。	cmskir@cmhk.com		www.cmsk1979.com	CNE100002FC6
101869	002001	新和成	2017-12-31	浙江新和成股份有限公司	医药制造业	C27	浙江省绍兴市新昌县羽林街道江北路4号	浙江省绍兴市新昌县七星街道新昌大道西路418号	1999-04-05	2004-06-25	浙江省	绍兴市	312500	石观群	0575-86017157	0575-86125377	sgq@cnhu.com	张莉瑾	91330000712560575G	报告期内公司无收购及出售资产、吸收合并事项	120.8611173	29.5172033238	120.9185206591	29.4961647745	胡柏藩	有机化工产品及饲料添加剂的生产、销售；经营进出口业务。	1263919000	原料药(范围详见《药品生产许可证》)、食品添加剂(生产凭有效许可证)及饲料添加剂的生产、销售,危险化学品的生产(范围详见《安全生产许可证》),危险化学品的批发(范围详见《危险化学品经营许可证》),非药品类易制毒化学品的销售(范围详见《非药品类易制毒化学品经营备案证明》)。有机化工产品(不含危险品及易制毒化学品)的生产销售,经营进出口业务,检验检测技术服务。(依法须经批准的项目,经相关部门批准后方可开展经营活动)。	investor@cnhu.com		www.cnhu.com	CNE000001J84
101869	002001	新和成	2018-12-31	浙江新和成股份有限公司	医药制造业	C27	浙江省绍兴市新昌县羽林街道江北路4号	浙江省绍兴市新昌县七星街道新昌大道西路418号	1999-04-05	2004-06-25	浙江省	绍兴市	312500	石观群	0575-86017157	0575-86125377	sgq@cnhu.com	张莉瑾	91330000712560575G	报告期内公司无收购及出售资产、吸收合并事项	120.8611173	29.5172033238	120.9185206591	29.4961647745	胡柏藩	有机化工产品及饲料添加剂的生产、销售；经营进出口业务。	2148662300	营养品、香精香料、高分子新材料和原料药的研发、生产和销售。产品主要有:营养品、香精香料和高分子新材料。	investor@cnhu.com		www.cnhu.com	CNE000001J84
101423	002007	华兰生物	2015-12-31	华兰生物工程股份有限公司	医药制造业	C27	河南省新乡市华兰大道甲1号	河南省新乡市华兰大道甲1号	1992-03-30	2004-06-25	河南省	新乡市	453003	谢军民	0373-3559989	0373-3559991	hualan@hualanbio.com	吕成玉		报告期内公司无收购及出售资产、吸收合并事项	113.9035812819	35.281768121	113.9036792819	35.281740121	安康	生产、销售自产的生物制品、血液制品。	581304800	人血白蛋白、静注人免疫球蛋白（PH4）、人凝血酶原复合物、人凝血因子Ⅷ等的生产和销售。	hualan@hualanbio.com		www.hualanbio.com	CNE000001JN8
101423	002007	华兰生物	2016-12-31	华兰生物工程股份有限公司	医药制造业	C27	河南省新乡市华兰大道甲1号	河南省新乡市华兰大道甲1号	1992-03-30	2004-06-25	河南省	新乡市	453003	谢军民	0373-3559989	0373-3559991	hualan@hualanbio.com	吕成玉	91410000614914114G	报告期内公司无收购及出售资产、吸收合并事项	113.9035812819	35.281768121	113.9036792819	35.281740121	安康	生产、销售自产的生物制品、血液制品。	930087680	人血白蛋白、静注人免疫球蛋白(PH4)、人凝血酶原复合物、人凝血因子Ⅷ等的生产和销售。	hualan@hualanbio.com		www.hualanbio.com	CNE000001JN8
101423	002007	华兰生物	2017-12-31	华兰生物工程股份有限公司	医药制造业	C27	河南省新乡市华兰大道甲1号	河南省新乡市华兰大道甲1号	1992-03-30	2004-06-25	河南省	新乡市	453003	谢军民	0373-3559989	0373-3559991	hualan@hualanbio.com	吕成玉	91410000614914114G	报告期内公司无收购及出售资产、吸收合并事项	113.9035812819	35.281768121	113.9036792819	35.281740121	安康	生产、销售自产的生物制品、血液制品。	930087680	人血白蛋白、静注人免疫球蛋白(PH4)、人凝血酶原复合物、人凝血因子Ⅷ等的生产和销售。	hualan@hualanbio.com		www.hualanbio.com	CNE000001JN8
101423	002007	华兰生物	2018-12-31	华兰生物工程股份有限公司	医药制造业	C27	河南省新乡市华兰大道甲1号	河南省新乡市华兰大道甲1号	1992-03-30	2004-06-25	河南省	新乡市	453003	谢军民	0373-3559989	0373-3559991	hualan@hualanbio.com	吕成玉	91410000614914114G	报告期内公司无收购及出售资产、吸收合并事项	113.9035812819	35.281768121	113.9036792819	35.281740121	安康	生产、销售自产的生物制品、血液制品。	930087680	人血白蛋白、静注人免疫球蛋白(PH4)、人凝血酶原复合物、人凝血因子Ⅷ等的生产和销售。	hualan@hualanbio.com		www.hualanbio.com	CNE000001JN8
101208	002008	大族激光	2015-12-31	大族激光科技产业集团股份有限公司	专用设备制造业	C35	广东省深圳市南山区深南大道9988号	广东省深圳市南山区深南大道9988号	2001-09-28	2004-06-25	广东省	深圳市	518052	杜永刚	0755-86161340	0755-86161327	bsd@hanslaser.com	王琳		出售重大股权情况: 交易对方:深圳市元亨矿业有限公司;田作林、冯秀琴、田作站;大族控股集团有限公司;江西大族能源科技股份有限公司 被出售股权:大族元亨17%股权;吉林大族100%股权;大族物业100%股权;大族能联52%股权 出售日:2015年06月02日;2015年11月30日;2015年05月21日;2015年11月23日 交易价格（万元）:3767.47;1366.69;1205.82;5304 本期初起至出售日该股权为上市公司贡献的净利润（万元）:0;-148.28;25.12;-880.82 出售对公司的影响:无重大影响;无重大影响;无重大影响;无重大影响 股权出售为上市公司贡献的净利润占净利润总额的比例:0.00%;1.13%;0.20%;0.15% 股权出售定价原则:公允价值;公允价值;公允价值;公允价值 是否为关联交易:否;否;是;是 与交易对方的关联关系:不适用;不适用…	113.9355678672	22.5404581555	113.9352318672	22.5403811555	高云峰	激光加工设备的研发、制造及销售。	1063433411	激光及相关产品、机电一体化设备的技术开发、销售；研发、销售光伏太阳能相关生产设备及产 品、LED等新光源产品及电光源设备；销售风力发电机零部件及并网设备；国内商业、物资供销业（不含专营、专控、专卖 商品）；兴办实业（具体项目另行申报）；进出口业务（具体按深贸第[2001]0176号文办）；自有物业租赁；设备租赁及维 修维护；售后服务。激光及相关产品、机电一体化设备的生产；生产激光雕刻机、激光焊接机、激光器及相关元件（不含限 制项目）；生产光伏太阳能相关生产设备及产品、LED等新光源产品及电光源设备；制造风力发电机零部件及并网设备；普 通货运。	bsd@hanslaser.com		www.hanslaser.com	CNE000001JQ1
101208	002008	大族激光	2016-12-31	大族激光科技产业集团股份有限公司	专用设备制造业	C35	广东省深圳市南山区深南大道9988号	广东省深圳市南山区深南大道9988号	2001-09-28	2004-06-25	广东省	深圳市	518052	杜永刚	0755-86161340	0755-86161327	bsd@hanslaser.com	王琳	91440300708485648T	报告期内公司无收购及出售资产、吸收合并事项	113.9355678672	22.5404581555	113.9352318672	22.5403811555	高云峰	激光加工设备的研发、制造及销售。	1067065245	经营进出口业务;物业租赁。(法律、行政法规、国务院决定禁止的项目除外,限制的项目须取得许可后方可经营)激光、机器人及自动化技术在智能制造领域的系统解决方案;激光雕刻机、激光焊接机、激光切割机、激光器及相关元件(不含限制项目)、机器人相关产品的研发、生产和销售;普通货运。	bsd@hanslaser.com		www.hanslaser.com	CNE000001JQ1
101208	002008	大族激光	2017-12-31	大族激光科技产业集团股份有限公司	专用设备制造业	C35	广东省深圳市南山区深南大道9988号	广东省深圳市南山区深南大道9988号	2001-09-28	2004-06-25	广东省	深圳市	518052	杜永刚	0755-86161340	0755-86161327	bsd@hanslaser.com	王琳	91440300708485648T	出售重大股权情况:交易对方:刘学智;被出售股权:大族冠华70.8125%股权;出售日:2017年06月30日;交易价格(万元):1,680.99;本期初起至出售日该股权为上市公司贡献的净利润(万元):-2,461.9;出售对公司的影响:无重大影响;股权出售为上市公司贡献的净利润占净利润总额的比例:1.24%;股权出售定价原则:公允价值;是否为关联交易:否;与交易对方的关联关系:不适用;所涉及的股权是否已全部过户:是;是否按计划如期实施,如未按计划实施,应当说明原因及公司已采取的措施:是;披露日期:2017年07月04日;披露索引:2017031.关于转让控股子公司大族冠华股权的公告	113.9355678672	22.5404581555	113.9352318672	22.5403811555	高云峰	激光加工设备的研发、制造及销售。	1067065245	经营进出口业务;物业租赁。(法律、行政法规、国务院决定禁止的项目除外,限制的项目须取得许可后方可经营)激光、机器人及自动化技术在智能制造领域的系统解决方案;激光雕刻机、激光焊接机、激光切割机、激光器及相关元件(不含限制项目)、机器人相关产品的研发、生产和销售;普通货运。	bsd@hanslaser.com		www.hanslaser.com	CNE000001JQ1
101208	002008	大族激光	2018-12-31	大族激光科技产业集团股份有限公司	专用设备制造业	C35	广东省深圳市南山区深南大道9988号	广东省深圳市南山区深南大道9988号	2001-09-28	2004-06-25	广东省	深圳市	518052	杜永刚	0755-86161340	0755-86161327	bsd@hanslaser.com	王琳	91440300708485648T	出售重大股权情况:交易对方:吴少华;被出售股权:深圳市明信测试设备有限公司11%股权;出售日:2018年02月08日;交易价格(万元):3,300;本期初起至出售日该股权为上市公司贡献的净利润(万元):7.61;出售对公司的影响:无重大影响;股权出售为上市公司贡献的净利润占净利润总额的比例:5.18%;股权出售定价原则:公允价值;是否为关联交易:否;与交易对方的关联关系:不适用;所涉及的股权是否已全部过户:是;是否按计划如期实施,如未按计划实施,应当说明原因及公司已采取的措施:是;披露日期:2018年03月19日;披露索引:2018023关于出售资产的公告	113.9355678672	22.5404581555	113.9352318672	22.5403811555	高云峰	激光加工设备的研发、制造及销售。	1067066801	经营进出口业务;物业租赁。(法律、行政法规、国务院决定禁止的项目除外,限制的项目须取得许可后方可经营)激光、机器人及自动化技术在智能制造领域的系统解决方案;激光雕刻机、激光焊接机、激光切割机、激光器及相关元件(不含限制项目)、机器人相关产品的研发、生产和销售;普通货运。	bsd@hanslaser.com		www.hanslaser.com	CNE000001JQ1
107582	002024	苏宁易购	2015-12-31	苏宁云商集团股份有限公司	零售业	F52	江苏省南京市山西路8号金山大厦1-5层	江苏省南京市玄武区苏宁大道1号	2001-06-29	2004-07-21	江苏省	南京市	210042	任峻	025-84418888-888122,888480	025-84418888-2-888480	stock@cnsuning.com	韩枫		1、出售重大资产情况： 交易对方：华夏资本管理有限公司(为“中信华夏苏宁云创二期资产支持专项计划”的计划管理人、代表专项计划) 被出售资产：以14家自有门店物业的房屋所有权及对应的土地使用权分别出资设立14 家全资子公司，出售资产为14 家全资子公司全部相关权益。 出售日：2015年6月29日 交易价格（万元）：326,450 本期初起至出售日该资产为上市公司贡献的净利润：不适用（注） 出售对公司的影响：公司以14家优质门店物业资产作为标的资产实施了本次交易，盘活了存量资产，获得充沛资金回笼以再次投入优质门店，进一步践行了门店资产购置—门店运营的这一良性资产运作方式，有利于继续巩固公司线下门店，提升O2O模式中的门店核心竞争力。 资产出售为上市公司贡献的净利润占净利润总额的比例：137.34% 资产出售定价原则：根据资产评估值协商确定 是否为关联交易：否 与交易对方的关联关系（适用关联交…	118.8921010385	32.0850284139	118.7721229187	32.0685365253	张近东	综合家用电器的连锁销售和服务。	7383043150	家用电器、电子产品、办公设备、通讯产品及配件的连锁销售和服务，空调配件的销售，制冷空调设备及家用电器的安装与维修，计算机软件开发、销售、系统集成，百货、自行车、电动助力车、摩托车、汽车的连锁销售，实业投资，场地租赁，柜台出租，国内商品展览服务，企业形象策划，经济信息咨询服务，人才培训，商务代理，仓储，微型计算机配件、软件的销售，微型计算机的安装及维修，废旧物资的回收与销售，乐器销售，工艺礼品，纪念品销售，国内贸易，代办(移动、电信、联通)委托的各项业务，移动通讯转售业务，货物运输代理，仓储，装卸搬运等以及本集团从事的电子商务，小额贷款，商业保理，保险销售，物流，房地产开发和销售等业务。	stock@cnsuning.com		www.suning.cn	CNE000001KF2
107582	002024	苏宁易购	2016-12-31	苏宁云商集团股份有限公司	零售业	F52	江苏省南京市山西路8号金山大厦1-5层	江苏省南京市玄武区苏宁大道1号	2001-06-29	2004-07-21	江苏省	南京市	210042	黄巍	0025-84418888-888122,84418888-888480	0025-84418888-2-888480	stock@cnsuning.com	韩枫	91320000608950987L	出售重大资产情况:交易对方:中信金石基金管理有限公司的相关方拟发起设立、并拟由苏宁金石(天津)基金管理有限公司和/或其他专业机构提供支持性服务的资产支持专项计划;被出售资产:6处供应链仓储物业的房屋所有权以及对应的土地使用权分别出资设立6家全资子公司;出售日:2016年6月24日;交易价格(万元):181,440;本期初起至出售日该资产为上市公司贡献的净利润:不适用(注1);出售对公司的影响:公司实施完成以6处供应链仓储物业为标的的创新型资产运作,盘活了供应链仓储存量资产,获得充沛的现金回笼以再次投入优质物流仓储资产,从而建立"物流仓储地产开发——物流仓储地产运营——基金运作"的良性资产运营方式,有利于公司持续巩固在同行业中的物流仓储战略优势;资产出售为上市公司贡献的净利润占净利润总额的比例:55.93%(注2);资产出售定价原则:根据资产评估值协商确定;是否为关联交易:否;与交易对方的…	118.8921010385	32.0850284139	118.7721229187	32.0685365253	张近东	综合家用电器的连锁销售和服务。	9310040	家用电器、电子产品、办公设备、通讯产品及配件的连锁销售和服务,空调配件的销售,制冷空调设备及家用电器的安装与维修,计算机软件开发、销售、系统集成,百货、自行车、电动助力车、摩托车、汽车的连锁销售,实业投资,场地租赁,柜台出租,国内商品展览服务,企业形象策划,经济信息咨询服务,人才培训,商务代理,仓储,微型计算机配件、软件的销售,微型计算机的安装及维修,废旧物资的回收与销售,乐器销售,工艺礼品,纪念品销售,国内贸易,代办(移动、电信、联通)委托的各项业务,移动通讯转售业务,货物运输代理,仓储,装卸搬运等以及本集团从事的电子商务,小额贷款,商业保理,保险销售,物流,房地产开发和销售等业务。	stock@cnsuning.com		www.suning.cn	CNE000001KF2
107582	002024	苏宁易购	2017-12-31	苏宁易购集团股份有限公司	零售业	F52	江苏省南京市山西路8号金山大厦1-5层	江苏省南京市玄武区苏宁大道1号	2001-06-29	2004-07-21	江苏省	南京市	210042	黄巍	025-84418888-888122,888480	025-84418888-2-888480	stock@cnsuning.com	韩枫	91320000608950987L	报告期内公司无收购及出售资产、吸收合并事项	118.8921010385	32.0850284139	118.7721229187	32.0685365253	张近东	综合家用电器的连锁销售和服务。	9310039655	家用电器、电子产品、办公设备、通讯产品及配件的连锁销售和服务,空调配件的销售,制冷空调设备及家用电器的安装与维修,计算机软件开发、销售、系统集成,百货、自行车、电动助力车、摩托车、汽车的连锁销售,实业投资,场地租赁,柜台出租,国内商品展览服务,企业形象策划,经济信息咨询服务,人才培训,商务代理,仓储,微型计算机配件、软件的销售,微型计算机的安装及维修,废旧物资的回收与销售,乐器销售,工艺礼品,纪念品销售,国内贸易,代办(移动、电信、联通)委托的各项业务,移动通讯转售业务,货物运输代理,仓储,装卸搬运等以及本集团从事的电子商务,小额贷款,商业保理,保险销售,物流,房地产开发和销售等业务。	stock@cnsuning.com		www.suning.cn;www.suning.com	CNE000001KF2
107582	002024	苏宁易购	2018-12-31	苏宁易购集团股份有限公司	零售业	F52	江苏省南京市山西路8号金山大厦1-5层	江苏省南京市玄武区苏宁大道1号	2001-06-29	2004-07-21	江苏省	南京市	210042	黄巍	025-84418888-888122,888480	025-84418888-2-888480	stock@cnsuning.com	韩枫	91320000608950987L	出售重大资产情况:交易对方:苏宁深创投-云享仓储物流设施一期基金;苏宁深创投-云享仓储物流设施一期基金;SuningSmarLifeHoldinLimited通过其100%控制的境内公司;苏宁金控投资有限公司(简称“苏宁金控”)及其指定主体、青岛四十人海盈叁号股权投资合伙企业(有限合伙)、嘉兴润石义方股权投资合伙企业(有限合伙)等其他主体;-;被出售股权:沈阳苏宁物流有限公司、徐州苏宁云商物流有限公司、湖南苏宁采购有限公司、上海沪申苏宁电器有限公司、重庆苏宁云商采购有限公司共5家公司100%股权;沈阳苏宁物流有限公司、徐州苏宁云商物流有限公司、湖南苏宁采购有限公司、上海沪申苏宁电器有限公司、重庆苏宁云商采购有限公司共5家公司100%股权;苏宁小店100%股权;苏宁金融服务(上海)有限公司本轮投资者增资扩股17.857%新股;AlibabaGroupHoldingLimited2,082.…	118.8921010385	32.0850284139	118.7721229187	32.0685365253	张近东	综合家用电器的连锁销售和服务。	9310039655	家用电器、电子产品、办公设备、通讯产品及配件的连锁销售和服务,空调配件的销售,制冷空调设备及家用电器的安装与维修,计算机软件开发、销售、系统集成,百货、自行车、电动助力车、摩托车、汽车的连锁销售,实业投资,场地租赁,柜台出租,国内商品展览服务,企业形象策划,经济信息咨询服务,人才培训,商务代理,仓储,微型计算机配件、软件的销售,微型计算机的安装及维修,废旧物资的回收与销售,乐器销售,工艺礼品、纪念品销售,国内贸易,代办(移动、电信、联通)委托的各项业务,移动通讯转售业务,货物运输代理,仓储,装卸搬运等以及本集团从事的电子商务,小额贷款,商业保理,保险销售,物流,房地产开发和销售等业务。	stock@cnsuning.com		www.suning.cn;www.suning.com	CNE000001KF2
101236	002027	分众传媒	2016-12-31	分众传媒信息技术股份有限公司	商务服务业	L72	广东省广州市黄埔区中新知识城凤凰三路8号2号楼2130室	上海市江苏路369号兆丰世贸大厦28层	1997-08-26	2004-08-04	广东省	广州市	200050	沈杰	021-22165288	021-22165288	FM002027@focusmedia.cn	林南	914401016185128337	报告期内公司无收购及出售资产、吸收合并事项	113.4942300234	23.3928005473	113.4939480234	23.3927975473	刘杰良	PC整机和电脑配件的研发、生产及销售。	8736833500	软件和信息技术服务业。	FM002027@focusmedia.cn		www.focusmedia.cn	CNE000001KK2
101236	002027	分众传媒	2017-12-31	分众传媒信息技术股份有限公司	商务服务业	L72	广东省广州市黄埔区中新知识城凤凰三路8号2号楼2130室	上海市长宁区江苏路369号兆丰世贸大厦28层	1997-08-26	2004-08-04	广东省	广州市	200050	孔微微	021-22165288	021-22165288	FM002027@focusmedia.cn	林南	914401016185128337	出售重大股权情况:交易对方:宁波梅山保税港区红杉智盛股权投资合伙企业(有限合伙)、华建国际实业(深圳)有限公司、芜湖俊振投资中心(有限合伙);数禾科技;被出售股权:数禾科技;分众小贷;出售日:2017-11-30;2017-12-31;交易价格(万元):12,000;33,641.5;本期初起至出售日该股权为上市公司贡献的净利润(万元):-6,044.15;429.61;出售对公司的影响:对主营业务无重大影响;对主营业务无重大影响;股权出售为上市公司贡献的净利润占净利润总额的比例:8.49%;0.00%;股权出售定价原则:公允价值;公允价值;是否为关联交易:否;否;与交易对方的关联关系:非关联方;非关联方;所涉及的股权是否已全部过户:是;是;是否按计划如期实施,如未按计划实施,应当说明原因及公司已采取的措施:是;是;披露日期:2017-11-18;2017-10-28;披露索引:巨潮资讯…	121.4316051328	31.2190452748	113.4939480234	23.3927975473	刘杰良	PC整机和电脑配件的研发、生产及销售。	12231566900	信息技术咨询服务;软件开发;计算机网络系统工程服务;网络技术的研究、开发。	FM002027@focusmedia.cn		www.focusmedia.cn	CNE000001KK2
101236	002027	分众传媒	2018-12-31	分众传媒信息技术股份有限公司	商务服务业	L72	广东省广州市黄埔区中新知识城凤凰三路8号2号楼2130室	上海市长宁区江苏路369号兆丰世贸大厦28层	1997-08-26	2004-08-04	广东省	广州市	200050	孔微微	021-22165288	021-22165288	FM002027@focusmedia.cn	林南	914401016185128337	报告期内公司无收购及出售资产、吸收合并事项	121.4316051328	31.2190452748	113.4939480234	23.3927975473	江南春	PC整机和电脑配件的研发、生产及销售。	14677880280	信息技术咨询服务;软件开发;计算机网络系统工程服务;网络技术的研究、开发。	FM002027@focusmedia.cn		www.focusmedia.cn	CNE000001KK2
101339	002032	苏泊尔	2018-12-31	浙江苏泊尔股份有限公司	金属制品业	C33	浙江省玉环市大麦屿经济开发区	浙江省杭州市高新技术产业区江晖路1772号苏泊尔大厦19层	1998-07-17	2004-08-17	浙江省	玉环市	310051	叶继德	0571-86858778	0571-86858678	yjd@supor.com	方琳	913300007046976861	报告期内公司无收购及出售资产、吸收合并事项	120.2081119877	30.2065783012	120.1528078534	30.2674698534	Thierry de La Tour d’Artaise	设计、生产、销售各种压力锅、铝制品炊具及小家电等，主要产品为压力锅、奶锅、汤锅、炒锅、蒸锅、真空保鲜锅、电水壶、电磁炉、电火锅、电饭煲、榨汁机等。	821243960	厨房用具、不锈钢制品、日用五金、小型家电及炊具的研发、生产和销售;产品为炊具及厨房小家电等。	002032@supor.com		www.supor.com.cn	CNE000001KS5
101548	002044	美年健康	2017-12-31	美年大健康产业控股股份有限公司	卫生	Q83	江苏省南通市人民东路218号	上海市静安区灵石路697号健康智谷9号楼三楼	1991-01-22	2005-05-18	江苏省	南通市	200072	熊芳君	021-66773289	021-66773220	xiongfj@health-100.cn	刘丽娟	91320600608304061J	报告期内公司无收购及出售资产、吸收合并事项	121.4486994007	31.2835189845	121.7080085428	31.8717729793	俞熔	高档时装的设计、生产、销售、服饰及原辅材料；纺织服装类产品的科技开发。	2601305797	从事医疗技术专业领域内的技术开发、技术咨询、技术转让、技术服务;投资管理;健康管理咨询(不得从事医疗活动、心理咨询);设计、生产、销售各式服装、服饰及原辅材料;纺织服装类产品的科技开发;自营和代理上述商品的进出口业务。(依法须经批准的项目,经相关部门批准后方可开展经营活动)	liulj@health-100.cn		www.health-100.cn	CNE000001LV7
101548	002044	美年健康	2018-12-31	美年大健康产业控股股份有限公司	卫生	Q83	江苏省南通市人民东路218号	上海市静安区灵石路697号健康智谷9号楼三楼	1991-01-22	2005-05-18	江苏省	南通市	200072	熊芳君	021-66773289	021-66773220	xiongfj@health-100.cn	刘丽娟	91320600608304061J	报告期内公司无收购及出售资产、吸收合并事项	121.4486994007	31.2835189845	121.7080085428	31.8717729793	俞熔	高档时装的设计、生产、销售、服饰及原辅材料；纺织服装类产品的科技开发。	3121566956	从事医疗技术专业领域内的技术开发、技术咨询、技术转让、技术服务;投资管理;健康管理咨询(不得从事医疗活动、心理咨询)等(依法须经批准的项目经相关部门批准后方可开展经营活动)。	liulj@health-100.cn		www.health-100.cn	CNE000001LV7
101245	002049	紫光国微	2016-12-31	紫光国芯股份有限公司	计算机、通信和其他电子设备制造业	C39	河北省唐山市玉田县无终西街3129号	河北省唐山市玉田县无终西街3129号	2001-09-17	2005-06-06	河北省	唐山市	064100	杜林虎	0315-6198161	0315-6198179	dulh@gosinoic.com	董玉沾	911302006010646915	出售重大股权情况:交易对方:北京亚仕同方科技有限公司;被出售股权:公司持有的北京同方以衡创业投资中心(有限合伙)的合伙权益;出售日:2016年08月03日;交易价格(万元):1,375:本期初起至出售日该股权为上市公司贡献的净利润(万元):0;出售对公司的影响:无;股权出售为上市公司贡献的净利润占净利润总额的比例:0.00%;股权出售定价原则:以合伙企业最近一期财务审计报告为作价参考依据,交易双方协商定价;是否为关联交易:是;与交易对方的关联关系:交易对方为公司原控股股东同方股份有限公司及其全资子公司北京同方创新投资有限公司共同投资设立的公司,且交易对方法定代表人潘晋先生为本公司离任一年内董事;所涉及的股权是否已全部过户:是;是否按计划如期实施,如未按计划实施,应当说明原因及公司已采取的措施:是;披露日期:2016年08月04日;披露索引:《中国证券报》及巨潮资讯网(http://www…	117.7175677186	39.8882731619	117.7305684319	39.8947064196	赵伟国	压电石英晶体元器件的开发、生产和销售。	606817968	集成电路设计、开发、销售与技术服务;高亮度发光二级管(LED)衬底材料开发、生产、销售;生产和销售压电石英晶体器件;经营本公司自产产品和技术的出口业务;经营本公司生产、科研所需的原辅材料、仪器仪表、机器设备、零配件及技术的进口业务(国家限定公司经营和禁止进出口的商品除外);经营进料加工和"三来一补"业务。	zhengquan@gosinoic.com		www.gosinoic.com	CNE000001M14
101247	002050	三花智控	2018-12-31	浙江三花智能控制股份有限公司	通用设备制造业	C34	浙江省绍兴市新昌县七星街道下礼泉	浙江省绍兴市新昌县梅渚镇沃西大道219号三花工业园区办公大楼	2001-12-19	2005-06-07	浙江省	绍兴市	312532	胡凯程	0571-28020008	0571-28876605	shc@zjshc.com	王语彤	913300006096907427	报告期内公司无收购及出售资产、吸收合并事项	120.7911642761	29.4706901527	120.8798682435	29.5181977549	张亚波	生产销售制冷空调用截止阀、电子膨胀阀、电磁阀、单向阀、北美截止阀、排水泵和球阀等七类产品。	2130646835	截止阀、电子膨胀阀、排水泵、电磁阀、单向阀、压缩机、压力管道元件、机电液压控制泵及其他机电液压控制元器件的生产销售,承接制冷配件的对外检测、试验及分析服务,从事进出口业务。主要产品:家用电器与汽车空调的控制元器件及部件。	shc@zjshc.com		www.zjshc.com	CNE000001M22
101725	002065	东华软件	2015-12-31	东华软件股份公司	软件和信息技术服务业	I65	北京市海淀区紫金数码园3号楼15层1501	北京市海淀区知春路紫金数码园东华合创大厦16层	2002-01-24	2006-08-23	北京市	北京市	100190	杨健	010-62662188	010-62662299	strongyang@dhcc.com.cn	高晗	911100007226188818	报告期内公司无收购及出售资产、吸收合并事项	116.3373472698	39.9788647838	116.3374122698	39.9785327838	薛向东	行业应用软件开发、计算机信息系统集成及相关服务业务。	1564561700	技术开发、技术咨询、技术服务、技术推广、技术转让；计算机系统服务；数据处理；基础软件 服务、应用软件服务、公共软件服务；销售计算机软、硬件及外围设备、通讯设备；承接工业控制与自动化系统工程、计算 机通讯工程、智能楼宇及数据中心计算机系统工程；货物进出口、技术进出口、代理进出口。主要产品为行业应用软件开发、计算机信息系统集成及相关服务业务等。	strongyang@dhcc.com.cn		www.dhcc.com.cn	CNE000001NL4
101725	002065	东华软件	2016-12-31	东华软件股份公司	软件和信息技术服务业	I65	北京市海淀区紫金数码园3号楼15层	北京市海淀区紫金数码园3号楼16层	2002-01-24	2006-08-23	北京市	北京市	100190	杨健	010-62662188	010-62662299	strongyang@dhcc.com.cn	张雯	911100007226188818	报告期内公司无收购及出售资产、吸收合并事项	116.3374902698	39.9787747838	116.3374122698	39.9785327838	薛向东	行业应用软件开发、计算机信息系统集成及相关服务业务。	1569893780	技术开发、技术咨询、技术服务、技术推广、技术转让;计算机系统服务;数据处理;基础软件服务、应用软件服务、公共软件服务;销售计算机软、硬件及外围设备、通讯设备;承接工业控制与自动化系统工程、计算机通讯工程、智能楼宇及数据中心计算机系统工程;货物进出口、技术进出口、代理进出口。:技术开发、技术咨询、技术服务、技术推广、技术转让;计算机系统服务;数据处理;基础软件服务、应用软件服务、公共软件服务;销售计算机软、硬件及外围设备、通讯设备;承接工业控制与自动化系统工程、计算机通讯工程、智能楼宇及数据中心计算机系统工程;货物进出口、技术进出口、代理进出口。行业应用软件开发、计算机信息系统集成及相关服务业务等。	strongyang@dhcc.com.cn		www.dhcc.com.cn	CNE000001NL4
101725	002065	东华软件	2017-12-31	东华软件股份公司	软件和信息技术服务业	I65	北京市海淀区紫金数码园3号楼15层	北京市海淀区紫金数码园3号楼16层	2002-01-24	2006-08-23	北京市	北京市	100190	杨健	010-62662188	010-62662299	strongyang@dhcc.com.cn	张雯	911100007226188818	报告期内公司无收购及出售资产、吸收合并事项	116.3374902698	39.9787747838	116.3374122698	39.9785327838	薛向东	行业应用软件开发、计算机信息系统集成及相关服务业务。	3139787560	技术开发、技术咨询、技术服务、技术推广、技术转让;计算机系统服务;数据处理;基础软件服务、应用软件服务、公共软件服务;销售计算机软、硬件及外围设备、通讯设备;承接工业控制与自动化系统工程、计算机通讯工程、智能楼宇及数据中心计算机系统工程;货物进出口、技术进出口、代理进出口。公司的主要产品为行业应用软件开发、计算机信息系统集成及相关服务业务等。	strongyang@dhcc.com.cn		www.dhcc.com.cn	CNE000001NL4
101725	002065	东华软件	2018-12-31	东华软件股份公司	软件和信息技术服务业	I65	北京市海淀区紫金数码园3号楼15层	北京市海淀区紫金数码园3号楼16层	2002-01-24	2006-08-23	北京市	北京市	100190	杨健	010-62662188	010-62662299	strongyang@dhcc.com.cn	张雯	911100007226188818	报告期内公司无收购及出售资产、吸收合并事项	116.3374122698	39.9785327838	116.3374122698	39.9785327838	薛向东	行业应用软件开发、计算机信息系统集成及相关服务业务。	3115482375	技术开发、技术咨询、技术服务、技术推广、技术转让;计算机系统服务;数据处理;基础软件服务、应用软件服务、公共软件服务;销售计算机软、硬件及外围设备、通讯设备、医疗器械II类;承接工业控制与自动化系统工程、计算机通讯工程、智能楼宇及数据中心计算机系统工程;货物进出口、技术进出口、代理进出口。公司的主要产品为行业应用软件开发、计算机信息系统集成及相关服务业务等。	strongyang@dhcc.com.cn		www.dhcc.com.cn	CNE000001NL4
101263	002074	国轩高科	2016-12-31	国轩高科股份有限公司	电气机械及器材制造业	C38	江苏省南通市通州区十总镇东源大道1号	安徽省合肥市新站区岱河路599号	1995-01-23	2006-10-18	江苏省	南通市	230012	马桂富	0551-62100213	0551-62100175	gxgk@hfgxgk.com	沈强生	91320600138346792B	报告期内公司无收购及出售资产、吸收合并事项	117.3752744308	31.9077896398	121.1266033069	32.1930096294	李缜	高、低压开关及成套设备，电器自动化、配网自动化设备及元器件的制造和销售。	876092112	锂离子电池及其材料、电池、电机及整车控制系统的研发、制造与销售;锂离子电池应急电源、储能电池、电动工具电池的研发、制造与销售;高、低压开关及成套设备,数字化电器设备,配网智能化设备及元器件,三箱产品的研发、制造、销售、承装;太阳能、风能可再生能源设备的研发、制造、销售与承装;节能环保电器及设备、船舶电器及设备的研发、制造、销售和安装;变压器、变电站、大型充电设备、车载充电机及车载高压箱的研发、制造、销售;自营和代理各类商品及技术的进出口业务(国家限定企业经营或禁止进出口的商品和技术除外);城市及道路照明工程的设计和施工。(依法须经批准的项目,经相关部门批准后方可开展经营活动)	gxgk@hfgxgk.com		www.hfgxgk.com	CNE000001NY7
101263	002074	国轩高科	2017-12-31	国轩高科股份有限公司	电气机械及器材制造业	C38	江苏省南通市通州区十总镇东源大道1号	安徽省合肥市新站区岱河路599号	1995-01-23	2006-10-18	江苏省	南通市	230012	马桂富	0551-62100213	0551-62100175	gxgk@hfgxgk.com	沈强生	91320600138346792B	报告期内公司无收购及出售资产、吸收合并事项	117.3752744308	31.9077896398	121.1266033069	32.1930096294	李缜	高、低压开关及成套设备，电器自动化、配网自动化设备及元器件的制造和销售。	1136650819	锂离子电池及其材料、电池、电机及整车控制系统的研发、制造与销售;锂离子电池应急电源、储能电池、电动工具电池的研发、制造与销售;高、低压开关及成套设备,数字化电器设备,配网智能化设备及元器件,三箱产品的研发、制造、销售、承装;太阳能、风能可再生能源设备的研发、制造、销售与承装;节能环保电器及设备、船舶电器及设备的研发、制造、销售和安装;变压器、变电站、大型充电设备、车载充电机及车载高压箱的研发、制造、销售;自营和代理各类商品及技术的进出口业务(国家限定企业经营或禁止进出口的商品和技术除外);城市及道路照明工程的设计和施工。(依法须经批准的项目,经相关部门批准后方可开展经营活动)	gxgk@hfgxgk.com		www.hfgxgk.com	CNE000001NY7
101337	002081	金螳螂	2015-12-31	苏州金螳螂建筑装饰股份有限公司	建筑装饰和其他建筑业	E50	江苏省苏州市工业园区民营工业区	江苏省苏州市西环路888号	1993-01-06	2006-11-20	江苏省	苏州市	215004	潘洁	0512-68660622	0512-68660622	tzglb@goldmantis.com	龙瑞		出售重大股权情况: 交易对方:方云峰、邹剑锋、孙高峰、陈硕、王一鸣 被出售股权:金螳螂（苏州）电子商务有限公司（原用名）41%股权 出售日:2015年08月18日 交易价格（万元）:4,100 本期初起至出售日该股权为上市公司贡献的净利润（万元）:-2,125.7 出售对公司的影响:公司不再持有原电商公司股权，采取自建家装O2O平台，有利于公司更快、更好的把控电商平台的运营。 股权出售为上市公司贡献的净利润占净利润总额的比例:1.47% 股权出售定价原则:由交易双方基于对电商公司最近一期经审计净资产及原始出资情况协商定价。 是否为关联交易:否 与交易对方的关联关系:-- 所涉及的股权是否已全部过户:是 是否按计划如期实施，如未按计划实施，应当说明原因及公司已采取的措施:是 披露日期:2015年08月20日 披露索引:详情请参见公司2015-049、2015-050号公告。	120.5800097261	31.2915964685	120.81845663	31.3682745591	倪林	承接酒店、写字楼、图书馆、医院、体育场馆等公共装饰工程的设计及施工。	1762205793	承接各类建筑室内、室外装修装饰工程的设计及施工；承接公 用、民用建设项目的水电设备安装；建筑装饰设计咨询、服务；家具制作。承接各类建 筑室内、室外艺术品的设计、施工；软装配饰设计、施工；环境导视系统设计、施工； 承接各类型建筑幕墙工程的设计、生产、制作、安装及施工；承接金属门窗工程的加工、 制作及施工（凭资质证书许可经营）；木制品制作；建筑石材加工。承接机电设备安装 工程的制作、安装（凭资质证书许可经营）；承接城市园林绿化工程的设计与施工（凭 资质证书许可经营）；承接园林古建筑工程的设计与施工（凭资质证书许可经营）；承接 消防设施工程的设计与施工（凭资质证书许可经营）；民用、公用建筑工程设计（凭资 质证书许可经营）。承接钢结构工程施工（凭资质证书许可经营），承接轻型钢结构工程 设计（凭资质证书许可经营）。承包境外建筑装修装饰、建筑幕墙工程和境内国际招标 工程，承包上述境外工程的勘测、咨询…	tzglb@goldmantis.com		www.goldmantis.com	CNE000001P86
101337	002081	金螳螂	2016-12-31	苏州金螳螂建筑装饰股份有限公司	建筑装饰和其他建筑业	E50	江苏省苏州市工业园区民营工业区内	江苏省苏州市西环路888号	1993-01-06	2006-11-20	江苏省	苏州市	215004	潘洁	0512-68660622	0512-68660622	tzglb@goldmantis.com	王扬	91320000608285139H	出售重大股权情况:交易对方:聂树凯;苏州诺金投资有限公司:被出售股权:辽宁金螳螂幕墙装饰有限公司60%股权;苏州金诺商业保理有限公司100%股权:出售日:2016年02月29日;2016年07月21日:交易价格(万元):1,500;4,065.35:本期初起至出售日该股权为上市公司贡献的净利润(万元):-62.33;78.47:出售对公司的影响:出售该资产不影响业务连续性和管理层稳定性。公司持有的辽宁金螳螂幕墙60%股权对应的辽宁金螳螂幕墙处置日合并报表中归属于母公司的净资产份额为2399.76元,与转让价款的差额899.76万元计入本公司合并报表的投资收益;出售该资产不影响业务连续性和管理层稳定性。公司持有的苏州金诺100%股权对应的苏州金诺处置日合并报表中归属于母公司的净资产份额为40,818,722.96元,与转让价款的差额165,191.56元计入本公司合并报表的投资收益;股权出…	120.5800097261	31.2915964685	120.81845663	31.3682745591	倪林	承接酒店、写字楼、图书馆、医院、体育场馆等公共装饰工程的设计及施工。	2643308689	室内装饰为主体,融幕墙、家具、景观、艺术品、机电设备安装等承接建筑工程施工总承包项目;承接各类建筑室内、室外装修装饰工程的设计及施工;承接公用、民用建设项目的水电设备安装;建筑装饰设计咨询、服务;家具制作。承接各类建筑室内、室外艺术品的设计、施工;软装配饰设计、施工;环境导视系统设计、施工;承接各类型建筑幕墙工程的设计、生产、制作、安装及施工;承接金属门窗工程的加工、制作及施工;木制品制作;建筑石材加工。承接机电设备安装工程的制作、安装;承接城市园林绿化工程的设计与施工;承接园林古建筑工程的设计与施工;承接消防设施工程的设计与施工;民用、公用建筑工程设计。承接钢结构工程施工,承接轻型钢结构工程设计;承接城市及道路照明工程;销售材料;承包境外建筑装修装饰、建筑幕墙工程和境内国际招标工程,承包上述境外工程的勘测、咨询、设计和监理项目,出口上述境外工程所需的设备、材料;对外派遣实施上述境外工程…	tzglb@goldmantis.com		www.goldmantis.com	CNE000001P86
101337	002081	金螳螂	2017-12-31	苏州金螳螂建筑装饰股份有限公司	建筑装饰和其他建筑业	E50	江苏省苏州市工业园区民营工业区内	江苏省苏州市西环路888号	1993-01-06	2006-11-20	江苏省	苏州市	215004	宁波	0512-68660622	0512-68660622	tzglb@goldmantis.com	王扬	91320000608285139H	报告期内公司无收购及出售资产、吸收合并事项	120.5800097261	31.2915964685	120.81845663	31.3682745591	倪林	承接酒店、写字楼、图书馆、医院、体育场馆等公共装饰工程的设计及施工。	2643308689	承接建筑工程施工总承包项目;承接各类建筑室内、室外装修装饰工程的设计及施工;承接公用、民用建设项目的水电设备安装;建筑装饰设计咨询、服务;家具制作。承接各类建筑室内、室外艺术品的设计、施工;软装配饰设计、施工;环境导视系统设计、施工;承接各类型建筑幕墙工程的设计、生产、制作、安装及施工;承接金属门窗工程的加工、制作及施工;木制品制作;建筑石材加工。承接机电设备安装工程的制作、安装;承接城市园林绿化工程的设计与施工;承接园林古建筑工程的设计与施工;承接消防设施工程的设计与施工;民用、公用建筑工程设计。承接钢结构工程施工,承接轻型钢结构工程设计;承接城市及道路照明工程;销售建筑材料;承包境外建筑装修装饰、建筑幕墙工程和境内国际招标工程,承包上述境外工程的勘测、咨询、设计和监理项目,出口上述境外工程所需的设备、材料;对外派遣实施上述境外工程所需的劳务人员。(依法须经批准的项目,经相关部门披露后…	tzglb@goldmantis.com		www.goldmantis.com	CNE000001P86
101337	002081	金螳螂	2018-12-31	苏州金螳螂建筑装饰股份有限公司	建筑装饰和其他建筑业	E50	江苏省苏州市工业园区民营工业区内	江苏省苏州市西环路888号	1993-01-06	2006-11-20	江苏省	苏州市	215004	宁波	0512-68660622	0512-68660622	tzglb@goldmantis.com	王扬	91320000608285139H	报告期内公司无收购及出售资产、吸收合并事项	120.5800097261	31.2915964685	120.81845663	31.3682745591	王汉林	承接酒店、写字楼、图书馆、医院、体育场馆等公共装饰工程的设计及施工。	2676408689	承接建筑工程施工总承包项目;承接各类建筑室内、室外装修装饰工程的设计及施工;承接公用、民用建设项目的水电设备安装;建筑装饰设计咨询、服务;家具制作。承接各类建筑室内、室外艺术品的设计、施工;软装配饰设计、施工;环境导视系统设计、施工;承接各类型建筑幕墙工程的设计、生产、制作、安装及施工;承接金属门窗工程的加工、制作及施工;木制品制作;建筑石材加工。承接机电设备安装工程的制作、安装;承接城市园林绿化工程的设计与施工;承接园林古建筑工程的设计与施工;承接消防设施工程的设计与施工;民用、公用建筑工程设计。承接钢结构工程施工,承接轻型钢结构工程设计;承接城市及道路照明工程;销售建筑材料;承包境外建筑装修装饰、建筑幕墙工程和境内国际招标工程,承包上述境外工程的勘测、咨询、设计和监理项目,出口上述境外工程所需的设备、材料;对外派遣实施上述境外工程所需的劳务人员。(依法须经批准的项目,经相关部门披露后…	tzglb@goldmantis.com		www.goldmantis.com	CNE000001P86
101226	002085	万丰奥威	2017-12-31	浙江万丰奥威汽轮股份有限公司	汽车制造业	C36	浙江省绍兴市新昌县工业区	浙江省绍兴市新昌县工业区	2001-09-30	2006-11-28	浙江省	绍兴市	312500	章银凤	0575-86298339	0575-86298339	yinfeng.zhang@wfjt.com		913300007324065674	报告期内公司无收购及出售资产、吸收合并事项	120.8956495547	29.5175984904	120.9038549947	29.4998333045	陈爱莲	汽车铝合金车轮的研发、制造和销售。	2186879678	汽车铝合金车轮和摩托车铝合金车轮及其他零部件的生产、销售及技术咨询、服务与劳务;汽车和摩托车用轻量化镁材料和部件设计、研发、制造与销售业务;金属、非金属材料及其制品、卡丁车、环保设备的研究、开发、制造、销售和有关技术服务;金属螺栓的制造加工,机械零件涂复处理,涂复设备,涂复溶剂的制造,涂复技术的服务;经营进出口业务。	wfirm@wfjt.com		www.wfaw.com.cn	CNE000001PF1
102556	002120	韵达股份	2018-12-31	韵达控股股份有限公司	邮政业	G60	浙江省慈溪市崇寿镇永清南路8号	上海市青浦区盈港东路6679号	1996-04-05	2007-03-06	浙江省	慈溪市	201700	符勤	021-39296789	021-23296863	ir@yundaex.com	杨红波	91330200144745634H	出售重大股权情况:交易对方:深圳玮荣企业发展有限公司;深圳玮荣企业发展有限公司;深圳玮荣企业发展有限公司;被出售股权:丰巢科技2.7207%股权;丰巢科技2.9927%股权;丰巢科技7.7539%股权;出售日:2018年06月14日;2018年06月14日;2018年06月14日;交易价格(万元):24,486;26,935;69,785;本期初起至出售日该股权为上市公司贡献的净利润(万元):4,486;0.42;54,347.93;出售对公司的影响:本次股权出售不会对公司未来持续经营业务产生重大不利影响;本次股权出售不会对公司未来持续经营业务产生重大不利影响;本次股权出售不会对公司未来持续经营业务产生重大不利影响;股权出售为上市公司贡献的净利润占净利润总额的比例:1.72%;0.00%;20.88%;股权出售定价原则:参考评估价值定价;参考评估价值定价;参考评估价值定价;是否为关联交易…	121.1731093288	31.1609582306	121.2666166586	30.2603672008	聂腾云	打火机、点火枪等产品的设计、生产和销售。	1712764576	国内快递(邮政企业专营业务除外),国内航空运输代理,普通货运,仓储服务,汽车租赁服务,实业投资等。	ir@yundaex.com		www.yundaex.com	CNE100000015
101349	002129	中环股份	2015-12-31	天津中环半导体股份有限公司	电气机械及器材制造业	C38	天津市新技术产业园区华苑产业区(环外)海泰东路12号	天津市新技术产业园区华苑产业区(环外)海泰东路12号	1988-12-21	2007-04-20	天津市	天津市	300384	安艳清	022-23789787	022-23789786	anyanqing@tjsemi.com	孙娟红		报告期内公司无收购及出售资产、吸收合并事项	117.1034863051	39.0780938724	117.1017803051	39.0784428724	沈浩平	半导体分立器件和单晶硅材料的研发、生产和销售，公司主要 产品有高压硅堆、硅桥式整流器、快恢复整流二极管、单晶硅及单晶硅片等。	2644236466	半导体材料、半导体器件、电子元件的制造、加工、批发、零售；电子仪器、设备整机及零部件制造、加工、批发、零售；房屋租赁；经营本企业自产产品及技术的出口业务和本企业所需的机械设备、零配件、原辅材料及技术的进口业务，太阳能电池、组件的研发、制造、销售，光伏发电系统及部件的制造、安装、销售，光伏电站运营（以上范围内国家有专营专项规定的按规定办理）	Tjsc@tjsemi.com		www.tjsemi.com	CNE1000000B8
101271	002131	利欧股份	2016-12-31	利欧集团股份有限公司	互联网和相关服务	I64	浙江省温岭市滨海镇利欧路1号	上海市普陀区中山北路3300号月星环球港B座40楼	2001-05-21	2007-04-27	浙江省	温岭市	200062	张旭波	021-61254159	021-61254163	sec@leogroup.cn	周利明	91330000728913048T	报告期内公司无收购及出售资产、吸收合并事项	121.5270468586	28.4588779838	121.5271118586	28.4590069838	王相荣	从事微型小型水泵和园林机械的研发、设计、制造、销售	1606698532	泵、园林机械、清洁机械设备、电机、汽油机、阀门、模具、五金工具、电气控制柜、成套供水设备、农业机械、机械设备、环保设备、电器零部件及相关配件的生产、销售,设计、制作、代理、发布国内各类广告,企业营销策划,进出口经营业务,实业投资。(依法须经批准的项目,经相关部门批准后方可开展经营活动)	wxr@leogroup.cn		www.leogroup.cn	CNE1000000F9
102390	002142	宁波银行	2015-12-31	宁波银行股份有限公司	货币金融服务	J66	浙江省宁波市鄞州区宁南南路700号	浙江省宁波市鄞州区宁南南路700号	1997-04-10	2007-07-19	浙江省	宁波市	315100	杨晨	0574-87050028	0574-87050027	DSH@NBCB.COM.CN	陈俊峰		报告期内公司无收购及出售资产、吸收合并事项	121.5413980905	29.8096751415	121.5411530905	29.8095501415	陆华裕	存款，贷款，办理国内结算，办理票据贴现，发行金融债券，代理发行、兑付债券，代理收付款、保险业务，保管箱服务。	3899794081	吸收公众 存款；发放短期、中期和长期贷款；办理国内结算；办理票据贴现；发行 金融债券；代理发行、代理兑付、承销政府债券；买卖政府债券；从事同 业拆借；从事银行卡业务；提供担保；代理收付款项及代理保险业务；提 供保管箱业务；办理地方财政信用周转使用资金的委托贷款业务；外汇存 款、贷款、汇款；外币兑换；国际结算，结汇、售汇；同业外汇拆借；外 币票据的承兑和贴现；外汇担保；经中国银行业监督管理机构、中国人民 银行和国家外汇管理机关批准的其他业务。	dsh@nbcb.com.cn		WWW.NBCB.COM.CN	CNE1000005P7
102390	002142	宁波银行	2016-12-31	宁波银行股份有限公司	货币金融服务	J66	浙江省宁波市鄞州区宁南南路700号	浙江省宁波市鄞州区宁南南路700号	1997-04-10	2007-07-19	浙江省	宁波市	315100	杨晨	0574-87050028	0574-87050027	DSH@NBCB.COM.CN	徐彦迪	91330200711192037M	报告期内公司无收购及出售资产、吸收合并事项	121.5413980905	29.8096751415	121.5411530905	29.8095501415	陆华裕	存款，贷款，办理国内结算，办理票据贴现，发行金融债券，代理发行、兑付债券，代理收付款、保险业务，保管箱服务。	3899794000	吸收公众存款;发放短期、中期和长期贷款;办理国内结算;办理票据贴现;发行金融债券;代理发行、代理兑付、承销政府债券;买卖政府债券;从事同业拆借;从事银行卡业务;提供担保;代理收付款项及代理保险业务;提供保管箱业务;办理地方财政信用周转使用资金的委托贷款业务;外汇存款、贷款、汇款;外币兑换;国际结算,结汇、售汇;同业外汇拆借;外币票据的承兑和贴现;外汇担保;经中国银行业监督管理机构、中国人民银行和国家外汇管理机关批准的其他业务。	dsh@nbcb.com.cn		WWW.NBCB.COM.CN	CNE1000005P7
102390	002142	宁波银行	2017-12-31	宁波银行股份有限公司	货币金融服务	J66	浙江省宁波市鄞州区宁东路345号	浙江省宁波市鄞州区宁东路345号	1997-04-10	2007-07-19	浙江省	宁波市	315042	俞罡	0574-87050028	0574-87050027	DSH@NBCB.COM.CN	童卓超	91330200711192037M	报告期内公司无收购及出售资产、吸收合并事项	121.6142234765	29.8653411606	121.6138134765	29.8654631606	陆华裕	存款，贷款，办理国内结算，办理票据贴现，发行金融债券，代理发行、兑付债券，代理收付款、保险业务，保管箱服务。	5069732000	吸收公众存款;发放短期、中期和长期贷款;办理国内结算;办理票据贴现;发行金融债券;代理发行、代理兑付、承销政府债券;买卖政府债券;从事同业拆借;从事银行卡业务;提供担保;代理收付款项及代理保险业务;提供保管箱业务;办理地方财政信用周转使用资金的委托贷款业务;外汇存款、贷款、汇款;外币兑换;国际结算,结汇、售汇;同业外汇拆借;外币票据的承兑和贴现;外汇担保;经中国银行业监督管理机构、中国人民银行和国家外汇管理机关批准的其他业务。	dsh@nbcb.com.cn		WWW.NBCB.COM.CN	CNE1000005P7
102390	002142	宁波银行	2018-12-31	宁波银行股份有限公司	货币金融服务	J66	浙江省宁波市鄞州区宁东路345号	浙江省宁波市鄞州区宁东路345号	1997-04-10	2007-07-19	浙江省	宁波市	315042	俞罡	0574-87050028	0574-87050027	DSH@NBCB.COM.CN	童卓超	91330200711192037M	报告期内公司无收购及出售资产、吸收合并事项	121.6142234765	29.8653411606	121.6138134765	29.8654631606	陆华裕	存款，贷款，办理国内结算，办理票据贴现，发行金融债券，代理发行、兑付债券，代理收付款、保险业务，保管箱服务。	5208555000	吸收公众存款;发放短期、中期和长期贷款;办理国内结算;办理票据贴现;发行金融债券;代理发行、代理兑付、承销政府债券;买卖政府债券;从事同业拆借;从事银行卡业务;提供担保;代理收付款项及代理保险业务;提供保管箱业务;办理地方财政信用周转使用资金的委托贷款业务;外汇存款、贷款、汇款;外币兑换;国际结算,结汇、售汇;同业外汇拆借;外币票据的承兑和贴现;外汇担保;经中国银行保险监督管理委员会、中国人民银行和国家外汇管理机关批准的其他业务。	dsh@nbcb.com.cn		WWW.NBCB.COM.CN	CNE1000005P7
102394	002146	荣盛发展	2015-12-31	荣盛房地产发展股份有限公司	房地产业	K70	河北省廊坊市经济技术开发区祥云道81号	河北省廊坊市开发区祥云道81号荣盛发展大厦	2003-01-20	2007-08-08	河北省	廊坊市	065001	陈金海	0316-5909688	0316-5908567	dongmichu@risesun.cn	张星星		报告期内公司无收购及出售资产、吸收合并事项	116.7689944147	39.5656653114	116.7688454147	39.5654283114	耿建明	普通商品房开发。	4348163851	房地产的开发与经营。 主要产品或服务为住宅、车库及商铺等。	dongmichu@risesun.cn		www.risesun.cn	CNE1000005Y9
102394	002146	荣盛发展	2016-12-31	荣盛房地产发展股份有限公司	房地产业	K70	河北省廊坊市经济技术开发区祥云道81号	河北省廊坊市经济技术开发区祥云道81号	2003-01-20	2007-08-08	河北省	廊坊市	065001	陈金海	0316-5909688	0316-5908567	dongmichu@risesun.cn	张星星	911310002360777257	报告期内公司无收购及出售资产、吸收合并事项	116.7689944147	39.5656653114	116.7688454147	39.5654283114	耿建明	普通商品房开发。	4348163851	主要产品或服务为住宅、车库及商铺等。	dongmichu@risesun.cn		www.risesun.cn	CNE1000005Y9
102394	002146	荣盛发展	2017-12-31	荣盛房地产发展股份有限公司	房地产业	K70	河北省廊坊市经济技术开发区祥云道81号	河北省廊坊市经济技术开发区祥云道81号	2003-01-20	2007-08-08	河北省	廊坊市	065001	陈金海	0316-5909688	0316-5908567	dongmichu@risesun.cn	张星星	911310002360777257	报告期内公司无收购及出售资产、吸收合并事项	116.7689944147	39.5656653114	116.7688454147	39.5654283114	耿建明	普通商品房开发。	4348163851	主要产品或服务为住宅、车库及商铺等。	dongmichu@risesun.cn		www.risesun.cn	CNE1000005Y9
102394	002146	荣盛发展	2018-12-31	荣盛房地产发展股份有限公司	房地产业	K70	河北省廊坊市经济技术开发区祥云道81号	河北省廊坊市经济技术开发区祥云道81号	2003-01-20	2007-08-08	河北省	廊坊市	065001	陈金海	0316-5909688	0316-5908567	dongmichu@risesun.cn	张星星	911310002360777257	报告期内公司无收购及出售资产、吸收合并事项	116.7688454147	39.5654283114	116.7688454147	39.5654283114	耿建明	普通商品房开发。	4348163851	主要产品或服务为住宅、车库及商铺等。	dongmichu@risesun.cn		www.risesun.cn	CNE1000005Y9
102570	002152	广电运通	2016-12-31	广州广电运通金融电子股份有限公司	通用设备制造业	C34	广东省广州市高新技术产业开发区科学城科林路9、11号	广东省广州市高新技术产业开发区科学城科林路9、11号	1999-07-08	2007-08-13	广东省	广州市	510663	任斌	020-62878517	020-62878517	securities@grgbanking.com	王英	914401017163404737	出售重大股权情况:交易对方:云南鹰卫安防科技有限公司;被出售股权:云南云通51%股权;出售日:2016年7月8日;交易价格(万元):381.60;本期初起至出售日该股权为上市公司贡献的净利润(万元):-9.10;出售对公司的影响:本次股权出售有利于优化公司资产结构、提高资产整体盈利能力,有利于维护公司广大股东的利益;股权出售为上市公司贡献的净利润占净利润总额的比例:-0.01%;股权出售定价原则:公开挂牌;是否为关联交易:否;与交易对方的关联关系:不适用;所涉及的股权是否已全部过户:是;是否按计划如期实施,如未按计划实施,应当说明原因及公司已采取的措施:是;披露日期:2016年5月28日、7月12日;披露索引:刊登在《证券时报》及巨潮资讯网(http://www.cninfo.com.cn)上的相关公告;	113.4454286541	23.1427390356	113.4459786541	23.1428430356	叶子瑜	从事银行自动柜员机（ATM）等货币自动处理设备及相关系统软件的研发、生产、销售和服务。	1619257150	计算机、通信和其他电子设备制造业。计算机应用电子设备制造;自动售货机、售票机、柜员机及零配件的批发;技术进出口;货物进出口(专营专控商品除外);计算器及货币专用设备制造;信息系统集成服务;信息技术咨询服务;软件开发;计算机技术开发、技术服务;计算机和辅助设备修理。	securities@grgbanking.com		www.grgbanking.com	CNE100000650
102571	002153	石基信息	2015-12-31	北京中长石基信息技术股份有限公司	软件和信息技术服务业	I65	北京市海淀区复兴路甲65号-A11层	北京市海淀区复兴路甲65号-A11层、14层,北京市东城区东水井胡同5号15层	1998-02-06	2007-08-13	北京市	北京市	100036	罗芳	010-68249356	010-68183776	luofang@shijinet.com.cn	赵文瑜		报告期内公司无收购及出售资产、吸收合并事项	116.4319176682	39.9222347155	116.2873779203	39.9080130076	李仲初	主要从事酒店信息管理系统软件的开发与销售、系统集成、技术支持与服务业务。	355596251	技术开发、技术咨询、技术转让、技术服务、技术培训；销售开发后的产品、计算机及外围设备；提供信息源服务；网络技术服务；电子商务(未取得专项审批的项目除外)；安装计算机；货物进出口、技术进出口、代理进出口；法律、行政法规、国务院决定禁止的，不得经营；法律、行政法规、国务院决定应经许可的，经审批机关批准并经工商行政管理机关登记注册后方可经营；法律、行政法规、国务院决定未规定许可的，自主选择经营项目开展经营活动。	IR@shijinet.com.cn		www.shijinet.com.cn	CNE100000668
102571	002153	石基信息	2016-12-31	北京中长石基信息技术股份有限公司	软件和信息技术服务业	I65	北京市海淀区复兴路甲65号-A11层	北京市海淀区复兴路乙65号北京悦宏国际酒店大堂东侧三层;北京市东城区东水井胡同5号15层	1998-02-06	2007-08-13	北京市	北京市	100036	罗芳	010-68249356	010-68183776	luofang@shijigroup.com	赵文瑜	91110000634342985H	出售重大股权情况:交易对方:深圳鹏博实业集团有限公司;被出售股权:深圳市垅运照明电器有限公司;出售日:2016年06月28日;交易价格(万元):2,200;本期初起至出售日该股权为上市公司贡献的净利润(万元):11.56;出售对公司的影响:处置该资产的投资损失为526.76万元;股权出售为上市公司贡献的净利润占净利润总额的比例:0.07%;股权出售定价原则:双方协商;是否为关联交易:否;与交易对方的关联关系:不适用;所涉及的股权是否已全部过户:是;是否按计划如期实施,如未按计划实施,应当说明原因及公司已采取的措施:是;披露日期:不适用;披露索引:不适用	116.2869539203	39.9078080076	116.2873779203	39.9080130076	李仲初	主要从事酒店信息管理系统软件的开发与销售、系统集成、技术支持与服务业务。	1066788753	技术开发、技术咨询、技术转让、技术服务、技术培训;销售开发后的产品、计算机及外围设备;提供信息源服务;网络技术服务;电子商务(未取得专项审批的项目除外);安装计算机;货物进出口、技术进出口、代理进出口。(企业依法自主选择经营项目,开展经营活动;依法须经批准的项目,经相关部门批准后依批准的内容开展经营活动;不得从事本市产业政策禁止和限制类项目的经营活动。)	ir@shijigroup.com		www.shijigroup.com	CNE100000668
102571	002153	石基信息	2017-12-31	北京中长石基信息技术股份有限公司	软件和信息技术服务业	I65	北京市海淀区复兴路甲65号-A11层	北京市石景山区玉泉路59号院2号楼燕保大厦6层;北京市东城区东水井胡同5号15层	1998-02-06	2007-08-13	北京市	北京市	100040,100010	罗芳	010-68249356	010-68183776	luofang@shijigroup.com	赵文瑜	91110000634342985H	出售重大股权情况:交易对方:张鸿麟;被出售股权:GreatKylin;出售日:43087;交易价格(万元):16,991.89;本期初起至出售日该股权为上市公司贡献的净利润(万元):0;出售对公司的影响:处置该股权的投资收益为1509.55万元;股权出售为上市公司贡献的净利润占净利润总额的比例:0.00%;股权出售定价原则:双方协商;是否为关联交易:否;与交易对方的关联关系:不适用;所涉及的股权是否已全部过户:是;是否按计划如期实施,如未按计划实施,应当说明原因及公司已采取的措施:是;披露日期:43088;披露索引:《关于全资子公司签署<GREAT KYLIN INVESTMENT LIMITED股权回购协议>的公告》(2017-61)详见2017年12月19日的《中国证券报》、《证券时报》及巨潮资讯网www.cninfo.com.cn。	116.2869539203	39.9078080076	116.2873779203	39.9080130076	李仲初	主要从事酒店信息管理系统软件的开发与销售、系统集成、技术支持与服务业务。	1066788753	技术开发、技术咨询、技术转让、技术服务、技术培训;销售开发后的产品、计算机及外围设备;提供信息源服务;网络技术服务;电子商务(未取得专项审批的项目除外);安装计算机;货物进出口、技术进出口、代理进出口。(企业依法自主选择经营项目,开展经营活动;依法须经批准的项目,经相关部门批准后依批准的内容开展经营活动;不得从事本市产业政策禁止和限制类项目的经营活动。)	ir@shijigroup.com		www.shijigroup.com	CNE100000668
102571	002153	石基信息	2018-12-31	北京中长石基信息技术股份有限公司	软件和信息技术服务业	I65	北京市海淀区复兴路甲65号-A11层	北京市石景山区玉泉路59号院2号楼燕保大厦6层,北京市东城区东水井胡同5号15层	1998-02-06	2007-08-13	北京市	北京市	100040,100010	罗芳	010-68249356	010-68183776	luofang@shijigroup.com	赵文瑜	91110000634342985H	出售重大股权情况:交易对方:ALIBABA SJ INVESTMENT LIMITED(以下简称"阿里SJ投资");深圳盒子信息科技有限公司(以下简称"深圳盒子信息");深圳盒子信息科技有限公司;被出售股权:Shiji Retail Information Technology Co.Ltd.(以下简称"石基零售")38%的股权;迅付信息科技有限公司(以下简称"迅付信息")22.5%股权注;环迅(上海)商业保理有限公司(以下简称"环迅保理")22.5%股权;出售日:2018年04月04日;不适用;2018年9月7日;交易价格(万元):305,774.75;24,750;1,127.42;本期初起至出售日该股权为上市公司贡献的净利润(万元):-670.49;不适用;17.55;出售对公司的影响:本报告期增加公司合并报表总资产不超过4.86亿美金,增加净资产不超过4.86亿美金;不适用;本报…	116.4320626682	39.9227957155	116.2873779203	39.9080130076	李仲初	主要从事酒店信息管理系统软件的开发与销售、系统集成、技术支持与服务业务。	1066903353	技术开发、技术咨询、技术转让、技术服务、技术培训;销售开发后的产品、计算机及外围设备;提供信息源服务;网络技术服务;电子商务(未取得专项审批的项目除外);安装计算机;货物进出口、技术进出口、代理进出口。(企业依法自主选择经营项目,开展经营活动;依法须经批准的项目,经相关部门批准后依批准的内容开展经营活动;不得从事本市产业政策禁止和限制类项目的经营活动。)	ir@shijigroup.com		www.shijigroup.com	CNE100000668
103183	002174	游族网络	2016-12-31	游族网络股份有限公司	互联网和相关服务	I64	福建省晋江市经济开发区（安东园）金山路31号	上海市徐汇区宜山路711号华鑫商务中心2号楼	1995-09-22	2007-09-25	福建省	晋江市	200233	刘楠	021-33671551	021-33676520	ir@youzu.com		91350000611569108K	报告期内公司无收购及出售资产、吸收合并事项	121.4143859616	31.1738537274	118.4657852088	24.6862198769	林奇	网页网络游戏、移动网络游戏的研发和运营。	861315045	计算机技术领域内的技术开发、技术转让、技术服务、技术咨询;计算机系统集成;动漫设计;创意服务;图文设计制作;计算机软硬件及辅助设备(除计算机信息系统安全专用产品)的销售;软件技术进出口业务。(依法须经批准的项目,经相关部门批准后方可开展经营活动)	ir@youzu.com		www.youzu.cn	CNE1000007K4
102401	002179	中航光电	2018-12-31	中航光电科技股份有限公司	计算机、通信和其他电子设备制造业	C39	河南省洛阳市自由贸易试验区洛阳片区周山路10号	河南省洛阳市自由贸易试验区洛阳片区周山路10号	2002-12-31	2007-11-01	河南省	洛阳市	471003	刘阳	0379-63011079	0379-63011077	liuyang@jonhon.cn	叶华	914100007457748527	报告期内公司无收购及出售资产、吸收合并事项	112.4120560489	34.6425330414	112.4120560489	34.6425330414	郭泽义	电连接器、光器件和线缆组件的研制开发、生产和销售	790940909	电子元器件及相关设备、新能源汽车充电设备的研发、生产、销售与服务,从事与本企业经营相关的进出口业务。	zhengquan@jonhon.cn		www.jonhon.cn	CNE1000007T5
102605	002183	怡亚通	2016-12-31	深圳市怡亚通供应链股份有限公司	商务服务业	L72	广东省深圳市宝安区新安街道兴华路南侧荣超滨海大厦A座1713	广东省深圳市龙岗区南湾街道李朗路3号怡亚通供应链整合物流中心1号楼	2004-03-30	2007-11-13	广东省	深圳市	518114	梁欣	0755-88393181	0755-88393322-3172	002183@eascs.com	常晓艳	91440300279398406U	报告期内公司无收购及出售资产、吸收合并事项	114.132443256	22.6490506051	113.8792767837	22.5487398357	周国辉	为企业(客户)提供除其核心业务(指产品设计、开发、制造、销售、市场)以外的其它供应链环节的服务，并根据客户需要提供包括代理采购、产品营销支持、进出口通关、供应商管理库存(VMI)、国际国内物流、物流加工、供应链结算配套服务、供应链信息服务等一系列、全方位的供应链管理和相关配套服务。	2108687964	国内商业(不含限制项目);计算机软硬件开发;企业管理咨询;黄金、白银、K金、铂金、钯金、钻石、珠宝等首饰的购销(以上不含法律、行政法规、国务院决定规定禁止的及需前置审批的项目,限制的项目须取得许可后方可经营);化妆品的进出口及购销;汽车销售;初级农产品的购销以及其他国内贸易;机械设备租赁、计算机及通信设备租赁(不含金融租赁项目及其他限制项目);网上贸易、进出口业务、供应链管理及相关配套服务;游戏机及配件的进出口、批发及销售;自有物业租赁;食品添加剂销售。^预包装食品(不含复热预包装食品),乳制品(含婴幼儿配方乳粉),批发;燃料油、沥青、页岩油的批发、进出口及相关配套业务(法律、行政法规、国务院决定规定禁止的及需前置审批的项目,限制的项目须取得许可后方可经营);酒类的批发与零售;保健食品销售;特殊医学用途配方食品销售。主要产品或服务为从事供应链管理服务。	002183@eascs.com		www.eascs.com	CNE1000007Y5
103204	002195	二三四五	2015-12-31	上海二三四五网络控股集团股份有限公司	软件和信息技术服务业	I65	上海市宜山路700号85幢6楼	上海市宜山路700号普天信息产业园2号楼12楼	1989-04-07	2007-12-12	上海市	上海市	200233	邱俊祺	021-64822345	021-64822236	stock@2345.com		91310000607203699D	报告期内公司无收购及出售资产、吸收合并事项	121.4177979216	31.1754025138	121.4169319216	31.1756085138	陈于冰	对日软件出口业务（软件外包）	871732720	计算机软、硬件系统及相关系统的集成、开发、咨询、销售及服务，经营本企业自产产品的出口业务和 本企业所需的机械设备、零配件、原辅材料的进出口业务（但国家限定公司经营或禁止进出口的商品及技 术除外），本企业包括本企业控股的成员企业，信息服务业务（含短信息服务业务，不含互联网信息服务 业务，电话信息服务业务）,实业投资	stock@2345.com		www.2345hyron.com	CNE1000008K2
103204	002195	二三四五	2016-12-31	上海二三四五网络控股集团股份有限公司	软件和信息技术服务业	I65	上海市徐汇区宜山路700号85幢6楼	上海市浦东新区博霞路11号3楼	1989-04-07	2007-12-12	上海市	上海市	201203	邱俊祺	021-64822345	021-64822236	stock@2345.com	严国庆	91310000607203699D	出售重大资产情况:交易对方:包叔平;被出售资产:上海海隆软件有限公司100%股权;出售日:2016年09月29日;交易价格(万元):45,341;本期初起至出售日该资产为上市公司贡献的净利润(万元):4,466.76;出售对公司的影响:对公司当期利润有一定积极影响;资产出售为上市公司贡献的净利润占净利润总额的比例:14.29%;资产出售定价原则:收益法的评估值;是否为关联交易:是;与交易对方的关联关系(适用关联交易情形):公司实际控制人;所涉及的资产产权是否已全部过户:是;所涉及的债权债务是否已全部转移:是;是否按计划如期实施,如未按计划实施,应当说明原因及公司已采取的措施:是;披露日期:2016年09月30日;披露索引:2016-060、2016-061、2016-062	121.6032948349	31.201077272	121.4169319216	31.1756085138	陈于冰	对日软件出口业务（软件外包）	1932615440	计算机软、硬件系统及相关系统的集成、开发、咨询、销售及服务,经营本企业自产产品的出口业务和本企业所需的机械设备、零配件、原辅材料的进出口业务(但国家限定公司经营或禁止进出口的商品及技术除外),本企业包括本企业控股的成员企业,信息服务业务(含短信息服务业务,不含互联网信息服务业务,电话信息服务业务),实业投资。	stock@2345.com		www.2345.net	CNE1000008K2
101290	002202	金风科技	2015-12-31	新疆金风科技股份有限公司	通用设备制造业	C34	新疆维吾尔自治区乌鲁木齐市经济技术开发区上海路107号	新疆维吾尔自治区乌鲁木齐市经济技术开发区上海路107号	2001-03-26	2007-12-26	新疆维吾尔自治区	乌鲁木齐市	830026	马金儒	010-67511996	010-67511985	goldwind@goldwind.com.cn	冀田		出售重大股权情况： 交易对方：赤峰市金能新能源有限责任公司 被出售股权：赤峰市天润鑫能新能源有限公司 出售日：2015年12月31日 交易价格（万元）：18380 本期初起至出售日该股权为上市公司贡献的净利润（万元）：-1542.24 出售对公司的影响：对公司业务的连续性、管理层稳定性、对财务状况和经营成果无影响 股权出售为上市公司贡献的净利润占净利润总额的比例：1.19% 股权出售定价原则：公允 是否为关联交易：否 与交易对方的关联关系：不适用 所涉及的股权是否已全部过户：是 是否按计划如期实施，如未按计划实施，应当说明原因及公司已采取的措施：是 披露日期：2015年10月24日 披露索引：——	87.5240398418	43.8913566514	87.5245168418	43.8914886514	武钢	大型风力发电机组的开发研制、生产及销售，中试型风力发电场的建设及运营。	2735541000	风力发电机组研发、制造及销售，风电服务及风电场投资、开发及销售业务等	goldwind@goldwind.cn	02208	www.goldwind.com.cn	CNE1000008S5
101290	002202	金风科技	2016-12-31	新疆金风科技股份有限公司	通用设备制造业	C34	新疆维吾尔自治区乌鲁木齐市经济技术开发区上海路107号	北京市经济技术开发区博兴一路8号	2001-03-26	2007-12-26	新疆维吾尔自治区	乌鲁木齐市	100176	马金儒	010-67511996	010-67511985	goldwind@goldwind.com.cn	冀田	91650000299937622W	出售重大股权情况:交易对方:中节能风力发电股份有限公司澳洲子公司;被出售股权:WhiteRockWindFarmPtyLtd;出售日:2016年05月18日;交易价格(万元):16,180;本期初起至出售日该股权为上市公司贡献的净利润(万元):-54.28;出售对公司的影响:风电场投资与开发是公司经常业务和主营业务,对财务状况和经营成果有较大影响;股权出售为上市公司贡献的净利润占净利润总额的比例:1.62%;股权出售定价原则:公允;是否为关联交易:否;与交易对方的关联关系:不适用;所涉及的股权是否已全部过户:是;是否按计划如期实施,如未按计划实施,应当说明原因及公司已采取的措施:是	116.5323278063	39.7565676727	87.5245168418	43.8914886514	武钢	大型风力发电机组的开发研制、生产及销售，中试型风力发电场的建设及运营。	2735541000	风力发电机组研发、制造及销售,风电服务及风电场投资、开发及销售业务等。	goldwind@goldwind.cn	02208	www.goldwind.com.cn	CNE1000008S5
101290	002202	金风科技	2017-12-31	新疆金风科技股份有限公司	通用设备制造业	C34	新疆维吾尔自治区乌鲁木齐市经济技术开发区上海路107号	北京市经济技术开发区博兴一路8号	2001-03-26	2007-12-26	新疆维吾尔自治区	乌鲁木齐市	100176	马金儒	010-67511996	010-67511985	goldwind@goldwind.com.cn	冀田	91650000299937622W	出售重大股权情况:交易对方:苹果运营公司;苹果运营公司;苹果运营公司;苹果运营公司;被出售股权:巧家天巧风电有限公司;朔州市平鲁区斯能风电有限公司;南阳润唐新能源有限公司;淄博润川新能源有限公司;出售日:2017年08月04日;2017年08月04;2017年09月27日;2017年09月19日;交易价格(万元):2,411;7,233;6,324;2,520;本期初起至出售日该股权为上市公司贡献的净利润(万元):944.93;1,631.62;3,498;175.02;出售对公司的影响:风电场投资与开发是公司经常业务和主营业务,对财务状况和经营成果有较大影响;风电场投资与开发是公司经常业务和主营业务,对财务状况和经营成果有较大影响;风电场投资与开发是公司经常业务和主营业务,对财务状况和经营成果有较大影响;风电场投资与开发是公司经常业务和主营业务,对财务状况和经营成果有较大影响;股权出售…	116.5323278063	39.7565676727	87.5245168418	43.8914886514	武钢	大型风力发电机组的开发研制、生产及销售，中试型风力发电场的建设及运营。	3556203300	风力发电机组研发、制造及销售,风电服务及风电场投资、开发及销售业务等。	goldwind@goldwind.cn	02208	www.goldwind.com.cn	CNE1000008S5
101290	002202	金风科技	2018-12-31	新疆金风科技股份有限公司	通用设备制造业	C34	新疆维吾尔自治区乌鲁木齐市经济技术开发区上海路107号	北京市经济技术开发区博兴一路8号	2001-03-26	2007-12-26	新疆维吾尔自治区	乌鲁木齐市	100176	马金儒	010-67511996	010-67511985	goldwind@goldwind.com.cn	冀田	91650000299937622W	出售重大股权情况:交易对方:西藏山南合一投资控股有限公司;被出售股权:朔州市平鲁区天瑞风电有限公司;出售日:2018年12月28日;交易价格(万元):19355.74;本期初起至出售日该股权为上市公司贡献的净利润(万元):10467.62;出售对公司的影响:风电场投资与开发是公司经常业务和主营业务,对财务状况和经营成果有较大影响;股权出售为上市公司贡献的净利润占净利润总额的比例:2.84%;股权出售定价原则:公允;是否为关联交易:否;与交易对方的关联关系:不适用;所涉及的股权是否已全部过户:是;是否按计划如期实施,如未按计划实施,应当说明原因及公司已采取的措施:是	116.5323278063	39.7565676727	87.5245168418	43.8914886514	武钢	大型风力发电机组的开发研制、生产及销售，中试型风力发电场的建设及运营。	3556203300	风力发电机组研发、制造及销售,风电服务及风电场投资、开发及销售业务等。	goldwind@goldwind.cn	02208	www.goldwind.com.cn	CNE1000008S5
103143	002230	科大讯飞	2015-12-31	科大讯飞股份有限公司	软件和信息技术服务业	I65	合肥市高新开发区望江西路666号	安徽省合肥市高新开发区望江西路666号	1999-12-30	2008-05-12	安徽省	合肥市	230088	江涛	0551-65331880	0551-65331802	taojiang@iflytek.com	杨锐		报告期内公司无收购及出售资产、吸收合并事项	117.1439713857	31.830843889	117.1437413857	31.830961889	刘庆峰	语音支撑软件、行业应用产品/系统、信息工程和运维服务。	1286626807	增值电信业务,专业技术人员培训,计算机软、硬件开发、生产和销售及技术服务,系统工程、信息服务;电子产品、计算机通讯设备研制、销售,进出口业务,安全技术防范工程,房屋租赁,物业管理服务,设计、制作、代理、发布广告(以上依法经营批准的项目经相关部门批准后方可开展经营活动)	xunfei@iflytek.com		www.iflytek.com	CNE100000B81
103143	002230	科大讯飞	2016-12-31	科大讯飞股份有限公司	软件和信息技术服务业	I65	安徽省合肥市高新开发区望江西路666号	安徽省合肥市高新开发区望江西路666号	1999-12-30	2008-05-12	安徽省	合肥市	230088	江涛	0551-65331880	0551-65331802	taojiang@iflytek.com	常晓明	91340000711771143J	报告期内公司无收购及出售资产、吸收合并事项	117.1439713857	31.830843889	117.1437413857	31.830961889	刘庆峰	语音支撑软件、行业应用产品/系统、信息工程和运维服务。	1315484994	增值电信业务,专业技术人员培训,计算机软、硬件开发、生产和销售及技术服务,系统工程、信息服务,电子产品、计算机通讯设备研发、生产、销售,进出口业务,安全技术防范工程,房屋租赁,物业管理服务,设计、制作、代理、发布广告,移动通信设备的研发、销售(以上依法须经批准的项目经相关部门批准后方可开展经营活动)。	xunfei@iflytek.com		www.iflytek.com	CNE100000B81
103143	002230	科大讯飞	2017-12-31	科大讯飞股份有限公司	软件和信息技术服务业	I65	安徽省合肥市高新开发区望江西路666号	安徽省合肥市高新开发区望江西路666号	1999-12-30	2008-05-12	安徽省	合肥市	230088	江涛	0551-65331880	0551-65331802	taojiang@iflytek.com	常晓明	91340000711771143J	报告期内公司无收购及出售资产、吸收合并事项	117.1439713857	31.830843889	117.1437413857	31.830961889	刘庆峰	语音支撑软件、行业应用产品/系统、信息工程和运维服务。	1388693628	增值电信业务,专业技术人员培训,计算机软、硬件开发、生产和销售及技术服务,系统工程、信息服务,电子产品、计算机通讯设备研发、生产、销售,进出口业务,安全技术防范工程,房屋租赁,物业管理服务,设计、制作、代理、发布广告,移动通信设备的研发、销售,图书、电子出版物销售(以上依法须经批准的项目经相关部门批准后方可开展经营活动)。	xunfei@iflytek.com		www.iflytek.com	CNE100000B81
103143	002230	科大讯飞	2018-12-31	科大讯飞股份有限公司	软件和信息技术服务业	I65	安徽省合肥市高新开发区望江西路666号	安徽省合肥市高新开发区望江西路666号	1999-12-30	2008-05-12	安徽省	合肥市	230088	江涛	0551-65331880	0551-65331802	taojiang@iflytek.com	常晓明	91340000711771143J	报告期内公司无收购及出售资产、吸收合并事项	117.1439713857	31.830843889	117.1437413857	31.830961889	刘庆峰	语音支撑软件、行业应用产品/系统、信息工程和运维服务。	2092530492	增值电信业务,专业技术人员培训,计算机软、硬件开发、生产和销售及技术服务,系统工程、信息服务,电子产品、计算机通讯设备研发、生产、销售,进出口业务,安全技术防范工程,房屋租赁,物业管理服务,设计、制作、代理、发布广告,移动通信设备的研发、销售,图书、电子出版物销售(以上依法须经批准的项目经相关部门批准后方可开展经营活动)。	xunfei@iflytek.com		www.iflytek.com	CNE100000B81
102425	002236	大华股份	2015-12-31	浙江大华技术股份有限公司	计算机、通信和其他电子设备制造业	C39	浙江省杭州市滨江区滨安路1187号	浙江省杭州市滨江区滨安路1199号	2002-04-04	2008-05-20	浙江省	杭州市	310053	吴坚	0571-28939522	0571-28051737	zqsw@dahuatech.com	李晓明	91330000727215176K	报告期内公司无收购及出售资产、吸收合并事项	120.1711406404	30.1834646546	120.1786067739	30.184084415	傅利泉	安防视频监控产品的研发、生产和销售。	1159899502	计算机软件的开发、服务、销售，电子产品及通讯产品的设计、开发、生产、安装及销售，网络产 品的开发、系统集成与销售，电子产品工程的设计、安装，经营进出口业务等。	zqsw@dahuatech.com		www.dahuatech.com	CNE100000BJ4
102425	002236	大华股份	2016-12-31	浙江大华技术股份有限公司	计算机、通信和其他电子设备制造业	C39	浙江省杭州市滨江区滨安路1187号	浙江省杭州市滨江区滨安路1199号	2002-04-04	2008-05-20	浙江省	杭州市	310053	吴坚	0571-28939522	0571-28051737	zqsw@dahuatech.com	李晓明	91330000727215176K	报告期内公司无收购及出售资产、吸收合并事项	120.1711406404	30.1834646546	120.1786067739	30.184084415	傅利泉	安防视频监控产品的研发、生产和销售。	2899411405	计算机软件的开发、服务、销售,电子产品及通讯产品的设计、开发、生产、安装及销售,网络产品的开发、系统集成与销售,电子产品工程的设计、安装,经营进出口业务等。	zqsw@dahuatech.com		www.dahuatech.com	CNE100000BJ4
102425	002236	大华股份	2017-12-31	浙江大华技术股份有限公司	计算机、通信和其他电子设备制造业	C39	浙江省杭州市滨江区滨安路1187号	浙江省杭州市滨江区滨安路1199号	2002-04-04	2008-05-20	浙江省	杭州市	310053	吴坚	0571-28939522	0571-28051737	zqsw@dahuatech.com	楼琼宇	91330000727215176K	报告期内公司无收购及出售资产、吸收合并事项	120.1711406404	30.1834646546	120.1786067739	30.184084415	傅利泉	安防视频监控产品的研发、生产和销售。	2898756130	计算机软件的开发、服务、销售,电子产品及通讯产品的设计、开发、生产、安装及销售,网络产品的开发、系统集成与销售,电子产品工程的设计、安装,经营进出口业务等。	zqsw@dahuatech.com		www.dahuatech.com	CNE100000BJ4
102425	002236	大华股份	2018-12-31	浙江大华技术股份有限公司	计算机、通信和其他电子设备制造业	C39	浙江省杭州市滨江区滨安路1187号	浙江省杭州市滨江区滨安路1199号	2002-04-04	2008-05-20	浙江省	杭州市	310053	吴坚	0571-28939522	0571-28051737	zqsw@dahuatech.com	楼琼宇	91330000727215176K	报告期内公司无收购及出售资产、吸收合并事项	120.1711406404	30.1834646546	120.1786067739	30.184084415	傅利泉	安防视频监控产品的研发、生产和销售。	2997621930	计算机软件的开发、服务、销售,电子产品及通讯产品的设计、开发、生产、安装及销售,网络产品的开发、系统集成与销售,电子产品工程的设计、安装,经营进出口业务等。	zqsw@dahuatech.com		www.dahuatech.com	CNE100000BJ4
102542	002241	歌尔股份	2015-12-31	歌尔声学股份有限公司	计算机、通信和其他电子设备制造业	C39	山东省潍坊市高新技术产业开发区东方路268号	山东省潍坊市高新技术产业开发区东方路268号	2001-06-25	2008-05-22	山东省	潍坊市	261031	贾军安	0536-8525688	0536-8525699	ir@goertek.com	贾阳	91370700729253432M	报告期内公司无收购及出售资产、吸收合并事项	119.1589634575	36.7411456528	119.1589634575	36.7411456528	姜滨	微型电声元器件和消费类电声产品的研发、制造和销售	1526459692	开发、制造、销售:声学与多媒体技术及产品,短距离无线通信、网络化会议系 统相关产品,电子产品自动化生产设备,精密电子产品模具,半导体类微机电产品,消费类电子产品、电 脑周边产品、LED 封装及相关应用产品;与以上产品相关的嵌入式软件的开发、销售;与以上技术、产 品相关的服务;货物进出口、技术进出口(不含无线电发射及卫星接收设备,国家法律法规禁止的项目除 外,需经许可经营的,须凭许可经营)。 主要产品包括微型麦克风、微型扬声器、耳机、 MEMS传感器、智能音响产品、智能电视配件产品、智能家用电子游戏机配件产品、智能可穿戴电子产品 等。	ir@goertek.com		www.goertek.com	CNE100000BP1
102542	002241	歌尔股份	2016-12-31	歌尔股份有限公司	计算机、通信和其他电子设备制造业	C39	山东省潍坊市高新技术产业开发区东方路268号	山东省潍坊市高新技术产业开发区东方路268号	2001-06-25	2008-05-22	山东省	潍坊市	261031	贾军安	0536-8525688	0536-8525699	ir@goertek.com	贾阳	91370700729253432M	报告期内公司无收购及出售资产、吸收合并事项	119.1589634575	36.7411456528	119.1589634575	36.7411456528	姜滨	微型电声元器件和消费类电声产品的研发、制造和销售	1526629845	开发、制造、销售：声学、光学、无线通信技术及相关产品,机器人与自动化装备,智能机电及信息产品,精密电子产品模具,精密五金件,半导体类、MEMS类产品,消费类电子产品,LED封装及相关应用产品;与以上产品相关的软件的开发、销售;与以上技术、产品相关的服务;货物进出口、技术进出口(不含无线电发射及卫星接收设备,国家法律法规禁止的项目除外)。(依法须经批准的项目,经相关部门批准后方可开展经营活动)。主要产品包括微型麦克风、微型扬声器、耳机、MEMS传感器、智能音响产品、增强现实和虚拟现实产品、智能家用电子游戏机配件产品、智能可穿戴电子产品等。	ir@goertek.com		www.goertek.com	CNE100000BP1
102542	002241	歌尔股份	2017-12-31	歌尔股份有限公司	计算机、通信和其他电子设备制造业	C39	山东省潍坊市高新技术产业开发区东方路268号	山东省潍坊市高新技术产业开发区东方路268号	2001-06-25	2008-05-22	山东省	潍坊市	261031	贾军安	0536-3055688	0536-3056777	ir@goertek.com	贾阳	91370700729253432M	报告期内公司无收购及出售资产、吸收合并事项	119.1589634575	36.7411456528	119.1589634575	36.7411456528	姜滨	微型电声元器件和消费类电声产品的研发、制造和销售	3245103948	开发、制造、销售:声学、光学、无线通信技术及相关产品,机器人与自动化装备,智能机电及信息产品,精密电子产品模具,精密五金件,半导体类、MEMS类产品,消费类电子产品,LED封装及相关应用产品;与以上产品相关的软件的开发、销售;与以上技术、产品相关的服务;货物进出口、技术进出口(不含无线电发射及卫星接收设备,国家法律法规禁止的项目除外)。(依法须经批准的项目,经相关部门批准后方可开展经营活动)。主要产品包括微型麦克风、微型扬声器、耳机、MEMS传感器、智能音响产品、增强现实和虚拟现实产品、智能家用电子游戏机配件产品、智能可穿戴电子产品等。	ir@goertek.com		www.goertek.com	CNE100000BP1
102542	002241	歌尔股份	2018-12-31	歌尔股份有限公司	计算机、通信和其他电子设备制造业	C39	山东省潍坊市高新技术产业开发区东方路268号	山东省潍坊市高新技术产业开发区东方路268号	2001-06-25	2008-05-22	山东省	潍坊市	261031	贾军安	0536-3055688	0536-3056777	ir@goertek.com	贾阳	91370700729253432M	报告期内公司无收购及出售资产、吸收合并事项	119.1589634575	36.7411456528	119.1589634575	36.7411456528	姜滨	微型电声元器件和消费类电声产品的研发、制造和销售	3245103948	开发、制造、销售:声学、光学、无线通信技术及相关产品,机器人与自动化装备,智能机电及信息产品,精密电子产品模具,精密五金件,半导体类、MEMS类产品,消费类电子产品,LED封装及相关应用产品;与以上产品相关的软件的开发、销售;与以上技术、产品相关的服务;货物进出口、技术进出口(不含无线电发射及卫星接收设备,国家法律法规禁止的项目除外)。(依法须经批准的项目,经相关部门批准后方可开展经营活动)。主要产品包括微型麦克风、微型扬声器、耳机、MEMS传感器、智能音响产品、增强现实和虚拟现实产品、智能家用电子游戏机配件产品、智能可穿戴电子产品等。	ir@goertek.com		www.goertek.com	CNE100000BP1
103167	002252	上海莱士	2015-12-31	上海莱士血液制品股份有限公司	医药制造业	C27	上海市奉贤区望园路2009号	上海市奉贤经济开发区生物科技园区望园路2009号	1988-10-29	2008-06-23	上海市	上海市	201401	刘峥	021-22130888-217	021-37515869	raas@raas-corp.com	张屹	913100006072419512	报告期内公司无收购及出售资产、吸收合并事项	121.4707809044	30.9673143547	121.4704349044	30.9672723547	陈杰	血液制品的研发、生产和销售。主要产品为人血白蛋白、静注射人免疫球蛋白、凝血因子产品等。	2758753062	许可经营项目：生产和销售血液制品、疫苗、诊断试剂及检测器具和检测技术并提供检测服务（依法须经批准的项目，经相关部门批准后方可开展经营活动）。主要产品：人血白蛋白、静注人免疫球蛋白等的生产和销售。	raas@raas-corp.com		www.raas-corp.com	CNE100000C31
103167	002252	上海莱士	2016-12-31	上海莱士血液制品股份有限公司	医药制造业	C27	上海市奉贤区望园路2009号	上海市奉贤区望园路2009号	1988-10-29	2008-06-23	上海市	上海市	201401	刘峥	021-22130888-217	021-37515869	raas@raas-corp.com	张屹	913100006072419512	报告期内公司无收购及出售资产、吸收合并事项	121.4707809044	30.9673143547	121.4704349044	30.9672723547	陈杰	血液制品的研发、生产和销售。主要产品为人血白蛋白、静注射人免疫球蛋白、凝血因子产品等。	4965755511	许可经营项目:生产和销售血液制品、疫苗、诊断试剂及检测器具和检测技术并提供检测服务(依法须经批准的项目,经相关部门批准后方可开展经营活动)。主要产品:人血白蛋白、静注人免疫球蛋白等的生产和销售。	raas@raas-corp.com		www.raas-corp.com	CNE100000C31
103167	002252	上海莱士	2017-12-31	上海莱士血液制品股份有限公司	医药制造业	C27	上海市奉贤区望园路2009号	上海市奉贤区望园路2009号	1988-10-29	2008-06-23	上海市	上海市	201401	刘峥	021-22130888-217	021-37515869	raas@raas-corp.com	张屹	913100006072419512	出售重大股权情况:交易对方:深圳熹丰;被出售股权:广仁药业;出售日:2017年04月28日;交易价格(万元):23,800;本期初起至出售日该股权为上市公司贡献的净利润(万元):-355.97;出售对公司的影响:产生0.77亿元税后投资净收益;股权出售为上市公司贡献的净利润占净利润总额的比例:9.20%;股权出售定价原则:公允价值;是否为关联交易:否;与交易对方的关联关系:不适用;所涉及的股权是否已全部过户:是;是否按计划如期实施,如未按计划实施,应当说明原因及公司已采取的措施:是;披露日期:2017年05月03日;披露索引:详见公司刊登在《证券时报》、《中国证券报》、《上海证券报》、《证券日报》及巨潮资讯网上的相关公告;*郑州莱士2015年至2017年度内所得税享受高新技术企业15%的优惠税率,但是由于2017年度高新技术产品的收入未能达到总收入的60%,故2017年不享受高新技术企业…	121.4707809044	30.9673143547	121.4704349044	30.9672723547	陈杰	血液制品的研发、生产和销售。主要产品为人血白蛋白、静注射人免疫球蛋白、凝血因子产品等。	4970238896	许可经营项目:生产和销售血液制品、疫苗、诊断试剂及检测器具和检测技术并提供检测服务(依法须经批准的项目,经相关部门批准后方可开展经营活动)。主要产品:人血白蛋白、静注人免疫球蛋白等的生产和销售。	raas@raas-corp.com		www.raas-corp.com	CNE100000C31
103167	002252	上海莱士	2018-12-31	上海莱士血液制品股份有限公司	医药制造业	C27	上海市奉贤区望园路2009号	上海市奉贤区望园路2009号	1988-10-29	2008-06-23	上海市	上海市	201401	刘峥	021-22130888-217	021-37515869	raas@raas-corp.com	邱宏	913100006072419512	报告期内公司无收购及出售资产、吸收合并事项	121.4704349044	30.9672723547	121.4704349044	30.9672723547	陈杰	血液制品的研发、生产和销售。主要产品为人血白蛋白、静注射人免疫球蛋白、凝血因子产品等。	4974622099	生产和销售血液制品、疫苗、诊断试剂及检测器具和检测技术并提供检测服务(依法须经批准的项目,经相关部门批准后方可开展经营活动)。主要产品:人血白蛋白、静注人免疫球蛋白等的生产和销售	raas@raas-corp.com		www.raas-corp.com	CNE100000C31
101466	002271	东方雨虹	2018-12-31	北京东方雨虹防水技术股份有限公司	非金属矿物制品业	C30	北京市顺义区顺平路沙岭段甲2号	北京市朝阳区高碑店北路康家园小区4号楼	1998-03-30	2008-09-10	北京市	北京市	100123	张蓓	010-85762629	010-85762629	stocks@yuhong.com.cn		91110000102551540H	报告期内公司无收购及出售资产、吸收合并事项	116.5197560105	39.9091171087	116.9053912196	40.1533456801	李卫国	新型建筑防水材料的研发、生产、销售及防水工程施工业务。	1492082699	制造防水材料、防腐材料、保温材料、建筑成套设备;防水材料、防腐材料、保温材料、建筑成套设备的技术开发、销售、技术服务;经营本企业自产产品及技术出口业务;本企业和成员企业生产所需的原辅材料、仪器仪表、机械设备、零配件及技术的进口业务(国家限定公司经营和国家禁止进出口的商品除外);经营进料加工和“三来一补”业务。(企业依法自主选择经营项目,开展经营活动;依法需经批准的项目,经相关部门批准后依批准的内容开展经营活动;不得从事本市产业政策禁止和限制类项目的经营活动。)建筑防水工程专业承包。	stocks@yuhong.com.cn		www.yuhong.com.cn	CNE100000CS3
102609	002292	奥飞娱乐	2015-12-31	广东奥飞动漫文化股份有限公司	文教、工美、体育和娱乐用品制造业	C24	广东省汕头市澄海区文冠路中段奥迪工业园	广东省广州市珠江新城临江大道5号保利国际中心10楼	1993-12-17	2009-09-10	广东省	汕头市	510623	王晶	020-38983278-3886	020-38336260	invest@gdalpha.com	高丹		出售重大股权情况： 交易对方:汕头市丰迪房地产开发有限公司； 被出售股权:广东宝奥现代物流投资有限公司； 出售日:2015年06月05日； 交易价格（万元）:12053.53； 本期初起至出售日该股权为上市公司贡献的净利润（万元）:-232.31； 出售对公司的影响:9,268.58； 股权出售为上市公司贡献的净利润占净利润总额的比例:18.95%； 股权出售定价原则:根据中广信评报字[2015]第205号《资产评估报告》，采用资产基础法进行评估； 是否为关联交易:是； 与交易对方的关联关系:关联法人； 所涉及的股权是否已全部过户:是； 是否按计划如期实施，如未按计划实施，应当说明原因及公司已采取的措施:是； 披露日期:2015年06月05日； 披露索引:刊登在《证券时报》、巨潮资讯网（www.cninfo.com.cn）的《关于转让参股子公司股权暨关联交易的公告》。	113.3178265713	23.1145779044	116.7408161597	23.4748924958	蔡东青	动漫影视片制作、发行、授权以及动漫玩具和非动漫玩具的开发、生产与销售。	1264551960	制作、复制、发行：广播剧、电视剧、动画片（制作须另申报）、专题、专栏（不含时政新闻类），综艺 （广播电视节目制作经营许可证有效期至2017年7月21日）；设计、制作、发布、代理国内外各类广告； 利用互联网经营游戏产品（含网络游戏虚拟货币发行）、动漫产品（网络文化经营许可证有效期限至2017 年8月12日）；从事投资管理及相关咨询服务；制造、加工、销售：玩具，工艺品（不含金银首饰），数 码电子产品，文具用品，塑料制品，五金制品，精密齿轮轮箱，童车，电子游戏机，婴童用品；销售：家 用电器，服装，日用百货，化工原料（危险化学品除外），塑料原料。经营本企业自产产品及相关技术的 出口业务；经营本企业生产、科研所需的原辅材料、机械设备、仪器仪表、零配件及相关技术的进口业务， 电子产品，体育用品；经营本企业的进料加工和“三来一补”业务。（依法须经批准的项目，经相关部门批 准后方可开展经营活动。）	invest@gdalpha.com		www.gdalpha.com	CNE100000FT4
102609	002292	奥飞娱乐	2016-12-31	奥飞娱乐股份有限公司	文教、工美、体育和娱乐用品制造业	C24	广东省汕头市澄海区文冠路中段奥迪工业园	广东省广州市天河区珠江新城金穗路62号侨鑫国际金融中心37楼	1993-12-17	2009-09-10	广东省	汕头市	510623	王晶	020-38983278-3886	020-38336260	invest@gdalpha.com	高丹	91440500617557490G	出售重大股权情况:交易对方:深圳辰海汇智能科技有限公司;被出售股权:广州奥娱叁特文化有限公司;出售日:2016年06月30日;交易价格(万元):30,600;本期初起至出售日该股权为上市公司贡献的净利润(万元):12,502.31;出售对公司的影响:对公司业务连续性、管理层稳定性无影响;股权出售为上市公司贡献的净利润占净利润总额的比例:25.00%;股权出售定价原则:按奥娱叁特所持三七互娱股票价值约为市价进行协商定价;是否为关联交易:否;与交易对方的关联关系:无关联关系;所涉及的股权是否已全部过户:是;是否按计划如期实施,如未按计划实施,应当说明原因及公司已采取的措施:是;披露日期:2016年06月22日;披露索引:详见刊登于证券时报和巨潮资讯网的《关于转让奥娱叁特股权的公告》(公告编号:2016-085)。;披露索引:巨潮资讯网2016-049号公告《关于以部分供应链仓储物业为标的资产…	113.3218358113	23.122698774	116.7408161597	23.4748924958	蔡东青	动漫影视片制作、发行、授权以及动漫玩具和非动漫玩具的开发、生产与销售。	1307889679	制作、复制、发行:广播剧、电视剧、动画片(制作须另申报)、专题、专栏(不含时政新闻类),综艺(广播电视节目制作经营许可证有效期至2017年7月21日);设计、制作、发布、代理国内外各类广告;利用互联网经营游戏产品(含网络游戏虚拟货币发行)、动漫产品(网络文化经营许可证有效期限至2017年8月12日);从事投资管理及相关咨询服务;制造、加工、销售:玩具,工艺品(不含金银首饰),数码电子产品,文具用品,塑料制品,五金制品,精密齿轮轮箱,童车,电子游戏机,婴童用品;销售:家用电器,服装,日用百货,化工原料(危险化学品除外),塑料原料。经营本企业自产产品及相关技术的出口业务;经营本企业生产、科研所需的原辅材料、机械设备、仪器仪表、零配件及相关技术的进口业务,电子产品,体育用品;经营本企业的进料加工和"三来一补"业务。(依法须经批准的项目,经相关部门批准后方可开展经营活动。)	invest@gdalpha.com		www.gdalpha.com	CNE100000FT4
102611	002294	信立泰	2015-12-31	深圳信立泰药业股份有限公司	医药制造业	C27	广东省深圳市福田区深南大道6009号车公庙绿景广场主楼37层	广东省深圳市福田区深南大道6009号车公庙绿景广场主楼37层	1998-07-29	2009-09-10	广东省	深圳市	518040	杨健锋	0755-83867888	0755-83867338	investor@salubris.cn	朱立锋	91440300708453259J	报告期内公司无收购及出售资产、吸收合并事项	114.0303267797	22.5361241501	114.0301327797	22.5358791501	叶澄海	心血管类、头孢类抗生素、骨吸收抑制剂类等药物的研发、生产和销售。	1046016000	开发研究、生产化学原料药、粉针剂、片剂、胶囊。货物及技 术进出口业务（不含进口分销业务）及基因药物（重组人甲状旁腺素1-34、重组人角质细胞 生长因子、抗CD20单克隆抗体、重组TNF可溶性受体Fc融合蛋白）；药品、化妆品、保健食 品的研发及技术服务和技术转让。	investor@salubris.cn		www.salubris.cn	CNE100000FW8
102611	002294	信立泰	2016-12-31	深圳信立泰药业股份有限公司	医药制造业	C27	广东省深圳市福田区深南大道6009号车公庙绿景广场主楼37层	广东省深圳市福田区深南大道6009号车公庙绿景广场主楼37层	1998-07-29	2009-09-10	广东省	深圳市	518040	杨健锋	0755-83867888	0755-83867338	investor@salubris.cn		91440300708453259J	报告期内公司无收购及出售资产、吸收合并事项	114.0303267797	22.5361241501	114.0301327797	22.5358791501	叶澄海	心血管类、头孢类抗生素、骨吸收抑制剂类等药物的研发、生产和销售。	1046016000	开发研究、生产化学原料药、粉针剂、片剂、胶囊。货物及技术进出口业务(不含进口分销业务)及基因药物(重组人甲状旁腺素1-34、重组人角质细胞生长因子、抗CD20单克隆抗体、重组TNF可溶性受体Fc融合蛋白);药品、化妆品、保健食品的研发及技术服务和技术转让。	investor@salubris.cn		www.salubris.cn	CNE100000FW8
102611	002294	信立泰	2017-12-31	深圳信立泰药业股份有限公司	医药制造业	C27	广东省深圳市福田区深南大道6009号车公庙绿景广场主楼37层	广东省深圳市福田区深南大道6009号车公庙绿景广场主楼37层	1998-07-29	2009-09-10	广东省	深圳市	518040	杨健锋	0755-83867888	0755-83867338	investor@salubris.cn		91440300708453259J	报告期内公司无收购及出售资产、吸收合并事项	114.0303267797	22.5361241501	114.0301327797	22.5358791501	叶澄海	心血管类、头孢类抗生素、骨吸收抑制剂类等药物的研发、生产和销售。	1046016000	开发研究、生产化学原料药、粉针剂、片剂、胶囊。货物及技术进出口业务(不含进口分销业务)及基因药物(重组人甲状旁腺素1-34、重组人角质细胞生长因子、抗CD20单克隆抗体、重组TNF可溶性受体Fc融合蛋白);药品、化妆品、保健食品的研发及技术服务和技术转让。	investor@salubris.cn		www.salubris.cn	CNE100000FW8
102611	002294	信立泰	2018-12-31	深圳信立泰药业股份有限公司	医药制造业	C27	广东省深圳市福田区深南大道6009号车公庙绿景广场主楼37层	广东省深圳市福田区深南大道6009号车公庙绿景广场主楼37层	1998-07-29	2009-09-10	广东省	深圳市	518040	杨健锋	0755-83867888	0755-83867338	investor@salubris.cn		91440300708453259J	报告期内公司无收购及出售资产、吸收合并事项	114.0303267797	22.5361241501	114.0301327797	22.5358791501	叶澄海	心血管类、头孢类抗生素、骨吸收抑制剂类等药物的研发、生产和销售。	1046016000	开发研究、生产化学原料药、粉针剂、片剂、胶囊。货物及技术进出口业务(不含进口分销业务)及基因药物(重组人甲状旁腺素1-34、重组人角质细胞生长因子、抗CD20单克隆抗体、重组TNF可溶性受体Fc融合蛋白);药品、化妆品、保健食品的研发及技术服务和技术转让。	investor@salubris.cn		www.salubris.cn	CNE100000FW8
102454	002299	圣农发展	2016-12-31	福建圣农发展股份有限公司	畜牧业	A03	福建省南平市光泽县十里铺圣农总部办公大楼	福建省南平市光泽县十里铺圣农总部办公大楼	1999-12-21	2009-10-21	福建省	南平市	354100	陈剑华	0599-7951242	0599-7951250	sncjh@sunnercn.com	廖俊杰	91350000705282941N	报告期内公司无收购及出售资产、吸收合并事项	117.3699904094	27.5271795712	117.3613523418	27.5328491198	傅光明	肉鸡饲养和肉鸡屠宰加工。	1110900000	畜、牧、禽、鱼、鳖养殖;茶果种植;混配合饲料生产;家禽屠宰、鲜冻畜禽产品的销售。	sunner023@sunnercn.com		www.sunnercn.com	CNE100000G78
102704	002304	洋河股份	2015-12-31	江苏洋河酒厂股份有限公司	酒、饮料和精制茶制造业	C15	江苏省宿迁市洋河镇中大街118号	江苏省宿迁市洋河镇中大街118号	2002-12-27	2009-11-06	江苏省	宿迁市	223800	丛学年	025-52489218	025-52489218	yanghe002304@vip.163.com	陆红珍;孙大力		报告期内公司无收购及出售资产、吸收合并事项	118.3828667401	33.7836915464	118.3839787401	33.7830055464	王耀	洋河蓝色经典、洋河大曲、敦煌古酿等系列品牌浓香型白酒的生产、加工和销售	1506988000	白酒的生产、销售，预包装食品的批发与零售，粮食收购。自营和代理各类商品和技术的进出口（国家 限定公司经营或禁止进出口的商品和技术除外），国内贸易。（依法须经批准的项目，经相关部门批准后方可开展经营活动）	yanghe002304@vip.163.com		www.chinayanghe.com	CNE100000HB8
102704	002304	洋河股份	2016-12-31	江苏洋河酒厂股份有限公司	酒、饮料和精制茶制造业	C15	江苏省宿迁市洋河中大街118号	江苏省宿迁市洋河中大街118号	2002-12-27	2009-11-06	江苏省	宿迁市	223800	丛学年	025-52489218	025-52489218	yanghe002304@vip.163.com	陆红珍;孙大力	9132000074557990XP	报告期内公司无收购及出售资产、吸收合并事项	118.3870087633	33.7820003641	118.3839787401	33.7830055464	王耀	洋河蓝色经典、洋河大曲、敦煌古酿等系列品牌浓香型白酒的生产、加工和销售	1506988000	酒类的生产、销售,预包装食品的批发与零售,粮食收购,自营和代理各类商品和技术的进出口(国家限定公司经营或禁止进出口的商品和技术除外),国内贸易,电子商务平台建设,商品的网上销售。(依法须经批准的项目,经相关部门批准后方可开展经营活动)	yanghe002304@vip.163.com		www.chinayanghe.com	CNE100000HB8
102704	002304	洋河股份	2017-12-31	江苏洋河酒厂股份有限公司	酒、饮料和精制茶制造业	C15	江苏省宿迁市洋河中大街118号	江苏省宿迁市洋河中大街118号	2002-12-27	2009-11-06	江苏省	宿迁市	223800	丛学年	025-52489218	025-52489218	yanghe002304@vip.163.com	陆红珍;孙大力	9132000074557990XP	报告期内公司无收购及出售资产、吸收合并事项	118.3870087633	33.7820003641	118.3839787401	33.7830055464	王耀	洋河蓝色经典、洋河大曲、敦煌古酿等系列品牌浓香型白酒的生产、加工和销售	1506988000	酒类的生产、销售,预包装食品的批发与零售,粮食收购,自营和代理各类商品和技术的进出口(国家限定公司经营或禁止进出口的商品和技术除外),国内贸易,电子商务平台建设,商品的网上销售。(依法须经批准的项目,经相关部门批准后方可开展经营活动)	yanghe002304@vip.163.com		www.chinayanghe.com	CNE100000HB8
102704	002304	洋河股份	2018-12-31	江苏洋河酒厂股份有限公司	酒、饮料和精制茶制造业	C15	江苏省宿迁市洋河中大街118号	江苏省宿迁市洋河中大街118号	2002-12-27	2009-11-06	江苏省	宿迁市	223800	丛学年	025-52489218	025-52489218	yanghe002304@vip.163.com	陆红珍;孙大力	9132000074557990XP	报告期内公司无收购及出售资产、吸收合并事项	118.3839787401	33.7830055464	118.3839787401	33.7830055464	王耀	洋河蓝色经典、洋河大曲、敦煌古酿等系列品牌浓香型白酒的生产、加工和销售	1506988000	酒类的生产、销售,预包装食品的批发与零售,粮食收购,自营和代理各类商品和技术的进出口(国家限定公司经营或禁止进出口的商品和技术除外),国内贸易,电子商务平台建设,商品的网上销售。(依法须经批准的项目,经相关部门批准后方可开展经营活动)	yanghe002304@vip.163.com		www.chinayanghe.com	CNE100000HB8
102613	002310	东方园林	2015-12-31	北京东方园林生态股份有限公司	土木工程建筑业	E48	北京市朝阳区酒仙桥北路甲10号院104号楼6层601号	北京市朝阳区酒仙桥北路甲10号院104号楼	1992-07-02	2009-11-27	北京市	北京市	100015	张强	010-59388886	010-59388885	orientlandscape@163.com			报告期内公司无收购及出售资产、吸收合并事项	116.5038274912	39.9842553393	116.5049614912	39.9846443393	何巧女	从事园林环境景观设计和园林绿化工程施工	1008711947	研究、开发、种植、销售园林植物；园林环境 景观的设计、园林绿化工程和园林维护；销售建筑材料、园林机械设备、体育用品；技术开 发；投资与资产管理。	orientlandscape@163.com		www.orientscape.com	CNE100000HN3
102613	002310	东方园林	2016-12-31	北京东方园林环境股份有限公司	土木工程建筑业	E48	北京市朝阳区酒仙桥北路甲10号院104号楼6层601号	北京市朝阳区酒仙桥北路甲10号院104号楼	1992-07-02	2009-11-27	北京市	北京市	100015	杨丽晶	010-59388886	010-59388885	orientlandscape@163.com		91110000102116928R	出售重大股权情况:交易对方:朱胜萱、余志远;被出售股权:东联(上海)创意设计发展有限公司60%股权;出售日:2016年02月29日;交易价格(万元):2,570;本期初起至出售日该股权为上市公司贡献的净利润(万元):-171.78;出售对公司的影响:收购事项对公司业务连续性、管理层稳定性未产生影响;出售该资产对公司净利润影响金额为3,169.00万元;股权出售定价原则:评估价值;是否为关联交易:否;与交易对方的关联关系:不适用;所涉及的股权是否已全部过户:是;是否按计划如期实施,如未按计划实施,应当说明原因及公司已采取的措施:不适用	116.5038274912	39.9842553393	116.5049614912	39.9846443393	何巧女	从事园林环境景观设计和园林绿化工程施工	2677360406	研究、开发、种植、销售园林植物;园林环境景观的设计、园林绿化工程和园林维护;销售建筑材料、园林机械设备、体育用品;技术开发;投资与资产管理。	orientlandscape@163.com		www.orientscape.com	CNE100000HN3
102613	002310	东方园林	2017-12-31	北京东方园林环境股份有限公司	土木工程建筑业	E48	北京市朝阳区酒仙桥北路甲10号院104号楼6层601号	北京市朝阳区酒仙桥北路甲10号院104号楼	1992-07-02	2009-11-27	北京市	北京市	100015	杨丽晶	010-59388886	010-59388885	orientlandscape@163.com	夏可钦	91110000102116928R	出售重大股权情况:交易对方:杭州申联环保科技有限公司;被出售股权:杭州富阳申能固废环保再生有限公司60%股权;出售日:2017年06月30日;交易价格(万元):151,150;本期初起至出售日该股权为上市公司贡献的净利润(万元):70,895,181.97;出售对公司的影响:未对公司业务连续性、管理层稳定性产生影响;股权出售为上市公司贡献的净利润占净利润总额的比例:-2.64%;股权出售定价原则:评估价值;是否为关联交易:否;与交易对方的关联关系:不适用;所涉及的股权是否已全部过户:是;是否按计划如期实施,如未按计划实施,应当说明原因及公司已采取的措施:不适用;披露日期:2017年04月28日;披露索引:巨潮资讯网(www.cninfo.com.cn)《关于出售杭州富阳申能固废环保再生有限公司60%股权的公告》	116.5038274912	39.9842553393	116.5049614912	39.9846443393	何巧女	从事园林环境景观设计和园林绿化工程施工	2682778484	水环境综合治理、工业危废处置及全域旅游,同时公司积极对土壤修复、矿山修复等领域进行开拓。公司最新的经营范围为:研究、开发、种植、销售、养护园林植物;园林环境景观的设计、园林绿化工程和园林维护;销售建筑材料、园林机械设备、体育用品、花卉、日用品;技术开发;投资与资产管理;企业管理服务;水污染治理;汽车尾气治理;烟气治理;废气治理;大气污染治理;噪声、光污染治理;辐射污染治理;地质灾害治理;固体废弃物污染治理;出租办公用房;工程勘察设计;测绘服务;规划管理;游览景区管理;社会经济咨询;体育运动项目经营(高危运动项目除外);承办展览展示;组织文化艺术交流活动	orientlandscape@163.com		www.orientscape.com	CNE100000HN3
102613	002310	东方园林	2018-12-31	北京东方园林环境股份有限公司	土木工程建筑业	E48	北京市朝阳区酒仙桥北路甲10号院104号楼6层601号	北京市朝阳区酒仙桥北路甲10号院104号楼	1992-07-02	2009-11-27	北京市	北京市	100015	陈莹	010-59388886	010-59388885	orientlandscape@163.com	夏可钦	91110000102116928R	出售重大股权情况:交易对方:上海电气投资有限公司;上海电气投资有限公司;被出售股权:宁波海锋环保有限公司60%股权;吴江市太湖工业废弃物处理有限公司65%股权;出售日:2018年11月16日;2018年11月16日;交易价格(万元):45,360;22,230;本期初起至出售日该股权为上市公司贡献的净利润(万元):-655.71;-167.77;出售对公司的影响:未对公司业务连续性、管理层稳定性产生影响;未对公司业务连续性、管理层稳定性产生影响;股权出售为上市公司贡献的净利润占净利润总额的比例:22.98%;1.95%;股权出售定价原则:评估价值;评估价值;是否为关联交易:否;否;与交易对方的关联关系:不适用;不适用;所涉及的股权是否已全部过户:是;是;是否按计划如期实施,如未按计划实施,应当说明原因及公司已采取的措施:是;是;披露索引:不适用;不适用	116.5038274912	39.9842553393	116.5049614912	39.9846443393	何巧女	从事园林环境景观设计和园林绿化工程施工	2685462004	水污染治理、研究、开发、种植、销售、养护园林植物;园林环境景观的设计、园林绿化工程和园林维护;销售建筑材料、园林机械设备、体育用品、花卉、日用品、电子产品、计算机、软件及辅助设备、工艺品、玩具、文具用品;技术开发;投资与资产管理;企业管理服务;汽车尾气治理;烟气治理;废气治理;大气污染治理;噪声、光污染治理;辐射污染治理;地质灾害治理;固体废弃物污染治理;出租办公用房;工程勘察设计;测绘服务;规划管理;游览景区管理;社会经济咨询;体育运动项目经营(高危运动项目除外);承办展览展示;组织文化艺术交流活动;市场调查;设计、制作、代理、发布广告;旅游信息咨询;旅游资源开发;技术服务;计算机系统服务;企业策划;产品设计;电脑图文设计、制作;电脑动画设计;技术咨询;以下项目限外埠分支机构经营:林木育苗、花卉种植。	orientlandscape@163.com		www.orientscape.com	CNE100000HN3
102631	002311	海大集团	2018-12-31	广东海大集团股份有限公司	农副食品加工业	C13	广东省广州市番禺区南村镇万博四路42号2座701	广东省广州市番禺区南村镇万博四路42号2座701	2004-01-08	2009-11-27	广东省	广州市	511445	黄志健	020-39388960	020-39388958	zqbgs@haid.com.cn	卢洁雯	914400007578948436	报告期内公司无收购及出售资产、吸收合并事项	113.3513577855	23.0110658729	113.3513577855	23.0110658729	薛华	水产预混料、水产配合饲料和畜禽配合饲料的研发、生产和销售。	1581211084	公司产品主要包括鸡、鸭、猪、鱼、虾等饲料,生猪、虾苗、鱼苗等养殖品种,以及畜禽和水产养殖过程中所需的生物制品、兽药、疫苗等产品	zqbgs@haid.com.cn		www.haid.com.cn	CNE100000HP8
101374	002352	顺丰控股	2017-12-31	顺丰控股股份有限公司	邮政业	G60	广东省深圳市宝安区福永大道303号万福大厦8楼801室	广东省深圳市福田区新洲十一街万基商务大厦	2003-05-22	2010-02-05	广东省	深圳市	518048	甘玲	0755-36395338	0755-36646400	sfir@sf-express.com	曾静	91340500150660397M	出售重大股权情况:交易对方:明德控股;被出售股权:丰巢科技15.8636%的股权;出售日:2017年9月25日;交易价格(万元):95181.60;本期初起至出售日该股权为上市公司贡献的净利润(万元):-9863.39;出售对公司的影响:本次股权出售不会对公司未来持续经营业务产生重大不利影响;股权出售为上市公司贡献的净利润占净利润总额的比例:18.32%;股权出售定价原则:参考评估价值定价;是否为关联交易:是;与交易对方的关联关系:公司的控股股东;所涉及的股权是否已全部过户:是;是否按计划如期实施,如未按计划实施,应当说明原因及公司已采取的措施:是;披露日期:2017年08月26日;披露索引:公司在巨潮资讯网上公告的讯网上公告的《关于向关联方转让参股公司深圳市丰巢科技有限公司部分股权的公告》(2017-056)	114.0409751618	22.5268496666	113.8209614839	22.673417121	王卫	快递物流	4411015524	资产管理、资本管理、投资管理(不得从事信托、金融资产管理、证券资产管理等业务)汽车租赁(不含带驾驶人员的汽车出租);企业总部管理;代理报关、代理报检;投资兴办实业;国内贸易;市场营销策划投资咨询及其他信息咨询(不含人才中介服务、证券及限制项目);从事网络技术、信息技术、电子产品技术的开发、技术服务技术咨询、技术转让、网络信息、电子商务服务平台、代收代付第三方货款结算服务、商业与投资管理咨询、企业管理咨询等;第二类增值电信业务中的呼叫中心业务和信息业务、道路普通货物运输业务;承办空运、陆运进出口货物及过境货物的国际运输代理业务,揽货、订舱、托运、仓储、包装;一、二类(国际、国内)航空运输销售代理业务;普通货运,配载,物流服务;科技信息咨询、项目投资咨询、物流信息咨询;数据处理;通讯设备的研发、销售及相关技术服务(依法须经批准的项目,经相关部门批准后方可开展经营活动);供应链管理及相关配套服…	sfir@sf-express.com		www.sf-express.com	CNE100000L63
101374	002352	顺丰控股	2018-12-31	顺丰控股股份有限公司	邮政业	G60	广东省深圳市宝安区福永大道303号万福大厦8楼801室	广东省深圳市福田区新洲十一街万基商务大厦	2003-05-22	2010-02-05	广东省	深圳市	518048	甘玲	0755-36395338	0755-36646400	sfir@sf-express.com	曾静	91340500150660397M	出售重大股权情况:交易对方:深圳顺泽产业园管理有限公司及深圳顺泰产业园管理有限公司;被出售股权:上海丰预泰实业有限公司100%股权及无锡市丰预泰实业有限公司100%股权;出售日:2018年12月11日;交易价格(万元):110500;出售对公司的影响:公司通过资产证券化运作,有利于盘活存量资产、拓宽融资渠道、增加营运资金;股权出售为上市公司贡献的净利润占净利润总额的比例:18.09%;股权出售定价原则:以评估基准日的市场价值进行评估,并基于评估价值与受让方协商定价;是否为关联交易:否;与交易对方的关联关系:不适用;所涉及的股权是否已全部过户:是;是否按计划如期实施,如未按计划实施,应当说明原因及公司已采取的措施:是;披露日期:2018年8月24日、2018年12月04日;披露索引:公司在巨潮资讯网(http://www.cninfo.com.cn)披露的公告《关于开展资产证券化暨关联交易…	114.0409751618	22.5268496666	113.8209614839	22.673417121	王卫	快递物流	4418767258	资产管理、资本管理、投资管理(不得从事信托、金融资产管理、证券资产管理等业务);汽车租赁(不含带驾驶人员的汽车出租);企业总部管理;代理报关、代理报检;投资兴办实业;国内贸易;市场营销策划、投资咨询及其他信息咨询(不含人才中介服务、证券及限制项目);从事网络技术、信息技术、电子产品技术的开发、技术服务、技术咨询、技术转让、网络信息、电子商务服务平台、商业管理、商业投资、投资管理咨询、投资管理、企业管理咨询等;第二类增值电信业务中的呼叫中心业务和信息业务、道路普通货物运输业务;承办空运、陆运进出口货物及过境货物的国际运输代理业务,揽货、订舱、托运、仓储、包装;一、二类(国际、国内)航空运输销售代理业务;普通货运,配载,物流服务;科技信息咨询、项目投资咨询、物流信息咨询;数据处理;通讯设备的研发、销售及相关技术服务(依法须经批准的项目,经相关部门批准后方可开展经营活动)、无人机及零配件的研发…	sfir@sf-express.com		www.sf-express.com	CNE100000L63
102581	002385	大北农	2015-12-31	北京大北农科技集团股份有限公司	农副食品加工业	C13	北京市海淀区中关村大街27号中关村大厦14层	北京市海淀区中关村大街27号中关村大厦14层	2007-10-26	2010-04-09	北京市	北京市	100080	陈忠恒	010-82856450	010-82856430	cwbgs@dbn.com.cn	马强	91110000102006956C	报告期内公司无收购及出售资产、吸收合并事项	116.3166203545	39.9774262393	116.3163703545	39.9776652393	邵根伙	饲料、种子产品的研发、生产、销售。	2733779415	销售兽药（严禁经营兽用预防用生物制品）；饲料加工（限分 公司经营）；第二类增值电信业务中的信息服务业务（仅限互联网信息服务，互联网信 息服务不含新闻、出版、教育、医疗保健、药品和医疗器械、电子公告服务）（电信与 信息服务业务经营许可证有效期至2019年12月10日）；技术开发、技术服务、技术 咨询、技术转让；畜牧和兽医科学研究与试验发展；动物营养保健品的技术开发；农 业信息技术开发、服务；销售饲料；出口本企业生产的饲料、动物营养保健品；进口 本企业生产、科研所需的原辅材料、机械设备、仪器仪表及零配件。	cwbgs@dbn.com.cn		www.dbn.com.cn	CNE100000N61
102581	002385	大北农	2016-12-31	北京大北农科技集团股份有限公司	农副食品加工业	C13	北京市海淀区中关村大街27号中关村大厦14层	北京市海淀区中关村大街27号中关村大厦14层	2007-10-26	2010-04-09	北京市	北京市	100080	陈忠恒	010-82856450	010-82856430	cwbgs@dbn.com.cn	马强	91110000102006956C	报告期内公司无收购及出售资产、吸收合并事项	116.3166203545	39.9774262393	116.3163703545	39.9776652393	邵根伙	饲料、种子产品的研发、生产、销售。	4100669122	销售兽药(严禁经营兽用预防用生物制品);饲料加工(限分公司经营);第二类增值电信业务中的信息服务业务(仅限互联网信息服务,互联网信息服务不含新闻、出版、教育、医疗保健、药品和医疗器械、电子公告服务)(电信与信息服务业务经营许可证有效期至2019年12月10日);技术开发、技术服务、技术咨询、技术转让;畜牧和兽医科学研究与试验发展;动物营养保健品的技术开发;农业信息技术开发、服务;销售饲料;出口本企业生产的饲料、动物营养保健品;进口本企业生产、科研所需的原辅材料、机械设备、仪器仪表及零配件。依法须经批准的项目,经相关部门批准后依批准的内容开展经营活动。	cwbgs@dbn.com.cn		www.dbn.com.cn	CNE100000N61
102581	002385	大北农	2017-12-31	北京大北农科技集团股份有限公司	农副食品加工业	C13	北京市海淀区中关村大街27号14层	北京市海淀区中关村大街27号中关村大厦14层	2007-10-26	2010-04-09	北京市	北京市	100080	陈忠恒	010-82856450	010-82856430	cwbgs@dbn.com.cn	马强	91110000102006956C	报告期内公司无收购及出售资产、吸收合并事项	116.3166203545	39.9774262393	116.3162903545	39.9776662393	邵根伙	饲料、种子产品的研发、生产、销售。	4242993865	销售兽药(严禁经营兽用预防用生物制品);饲料加工(限分公司经营);第二类增值电信业务中的信息服务业务(仅限互联网信息服务,互联网信息服务不含新闻、出版、教育、医疗保健、药品和医疗器械、电子公告服务)(电信与信息服务业务经营许可证有效期至2019年12月10日);技术开发、技术服务、技术咨询、技术转让;畜牧和兽医科学研究与试验发展;动物营养保健品的技术开发;农业信息技术开发、服务;销售饲料;出口本企业生产的饲料、动物营养保健品;进口本企业生产、科研所需的原辅材料、机械设备、仪器仪表及零配件。依法须经批准的项目,经相关部门批准后依批准的内容开展经营活动。	cwbgs@dbn.com.cn		www.dbn.com.cn	CNE100000N61
102114	002399	海普瑞	2015-12-31	深圳市海普瑞药业股份有限公司	医药制造业	C27	广东省深圳市南山区松坪山郎山路21号	广东省深圳市南山区高新区中区高新中一道19号	1998-04-21	2010-05-06	广东省	深圳市	518057	步海华	0755-26980311	0755-86142889	stock@hepalink.com	白琼		报告期内公司无收购及出售资产、吸收合并事项	113.9350115572	22.5487026545	113.9398545272	22.5562462435	李锂	肝素钠原料药的研究、生产和销售	800200000	开发、生产经营原料药（肝素钠），从事货物及技术进出口（不含分销及国家专营、专控、专卖商品）。 主要产品:肝素钠原料药。	stock@hepalink.com		www.hepalink.com	CNE100000P02
102663	002410	广联达	2018-12-31	广联达科技股份有限公司	软件和信息技术服务业	I65	北京市海淀区西北旺东路10号院东区13号楼	北京市海淀区西北旺东路10号院东区13号楼	2007-12-28	2010-05-25	北京市	北京市	100193	李树剑	010-56403000	010-56403335	lisj-c@glodon.com	常帆	91110000700049024C	报告期内公司无收购及出售资产、吸收合并事项	116.2731647047	40.0439491705	116.2835570991	40.0458662279	刁志中	公司为建筑行业工程项目建设信息化的软件企业，主要业务为工程造价系列软件、项目管理系列软件的开发、销售和相关软件技术服务。	1126551939	工程造价业务、工程施工业务、工程信息业务、海外业务以及产业金融业务等。	webmaster@glodon.com		www.glodon.com	CNE100000PH8
101919	002411	必康股份	2017-12-31	江苏必康制药股份有限公司	医药制造业	C27	江苏省南通市如东沿海经济开发区黄海三路12号	江苏省新沂市钟吾南路18号财政局大厦北楼	2007-12-24	2010-05-25	江苏省	南通市	221400	苏熳	0516-88602411	0516-81619810	suman@biconjs.com	程丹;葛家汀	913206007448277138	出售重大股权情况:交易对方:如东县新天和资产管理有限公司;被出售股权:永富化工100%股权;出售日:2017年09月26日;交易价格(万元):3,081.89;本期初起至出售日该股权为上市公司贡献的净利润(万元):-98.55;出售对公司的影响:本次交易符合公司产业结构调整和优化的需要,有利于促进公司资产的有效配置,及时处置闲置土地,并置换新的可合理利用的土地,从而提高资产运营效率,降低经营成本,集中力量发展公司核心优势产业,符合公司的未来战略发展规划和长远利益。本次交易完成后,公司子公司九九久科技不再持有永富化工的股权,永富化工将不再纳入公司合并报表范围。鉴于永富化工此前并未实际开展生产经营业务,本次交易不会对公司财务及经营状况产生不利影响;股权出售为上市公司贡献的净利润占净利润总额的比例:0.86%;股权出售定价原则:以2017年7月31日为基准日分别进行了审计、评估。根据中兴华会计…	121.045326246	32.5380457873	121.045821246	32.5378727873	谷晓嘉	医药中间体类产品与氮肥类产品的研发、生产和销售。	1532283909	中药材收购;药品的生产及自产品的销售;7-氨基-3-去乙酰氧基头孢烷酸(7-ADCA)、5,5-二甲基海因及其衍生产品、三氯吡啶醇钠、六氟磷酸锂、锂电池隔膜、高强高模聚乙烯纤维、无纬布及制品、盐酸、氟化氢(无水)、氢氟酸、苯乙酸、氯化铵、硫酸铵、硫酸吡啶盐、塑料制品的生产、销售;化工设备(压力容器除外)、机械设备制造、安装;经营本企业自产产品及技术的出口业务和本企业所需的机械设备、零配件、原辅材料及技术的进口业务(国家限定公司经营或禁止进出口的商品及技术除外)。(依法须经批准的项目,经相关部门批准后方可开展经营活动)	002411@biconjs.com			CNE100000PJ4
101919	002411	必康股份	2018-12-31	延安必康制药股份有限公司	医药制造业	C27	陕西省延安市宝塔区新区创新创业小镇E区	陕西省西安市雁塔区锦业一路6号永利国际金融中心39楼	2007-12-24	2010-05-25	陕西省	延安市	710065	苏熳	029-81149561	029-81149560	002411@biconya.com	罗旭	913206007448277138	出售重大股权情况:交易对方:东方日升新能源股份有限公司;被出售股权:九九久科技12.76%股权;出售日:2018年12月19日;交易价格(万元):35,000;本期初起至出售日该股权为上市公司贡献的净利润(万元):4,828.98;出售对公司的影响:利于提升公司化工板块的盈利能力。同时,有利于公司进一步整合资源,优化资产结构,集中资金发展公司主营业务,增强公司持续经营和健康发展的能力;股权出售为上市公司贡献的净利润占净利润总额的比例:0.00%;股权出售定价原则:收益法评估;是否为关联交易:否;与交易对方的关联关系:非关联;所涉及的股权是否已全部过户:是;是否按计划如期实施,如未按计划实施,应当说明原因及公司已采取的措施:按计划实施;披露日期:2018年12月20日;披露索引:详见公司登载于《中国证券报》、《证券时报》、《上海证券报》、《证券日报》和巨潮资讯网(http://www.cn…	108.8837822074	34.1908766508	109.4931129431	36.5912746149	谷晓嘉	医药中间体类产品与氮肥类产品的研发、生产和销售。	1532283909	中药材收购;药品的生产及自产品的销售;7-氨基-3-去乙酰氧基头孢烷酸(7-ADCA)、5,5-二甲基海因及其衍生产品、三氯吡啶醇钠、六氟磷酸锂、锂电池隔膜、高强高模聚乙烯纤维、无纬布及制品、盐酸、氟化氢(无水)、氢氟酸、苯乙酸、氯化铵、硫酸铵、硫酸吡啶盐、塑料制品的生产及自产品销售(上述产品的生产、销售需按环保审批意见执行);化工设备(压力容器除外)、机械设备制造、安装;经营本企业自产产品及技术的出口业务和本企业所需的机械设备、零配件、原辅材料及技术的进口业务(国家限定公司经营或禁止进出口的商品及技术除外)。(依法须经批准的项目,经相关部门批准后方可开展经营活动)	002411@biconya.com			CNE100000PJ4
102440	002415	海康威视	2015-12-31	杭州海康威视数字技术股份有限公司	计算机、通信和其他电子设备制造业	C39	浙江省杭州市西湖区马塍路36号	浙江省杭州市滨江区东流路700号海康威视制造基地1号楼6楼董事会办公室	2001-11-30	2010-05-28	浙江省	杭州市	310052	郑一波	0571-89710492	0571-89986895	hikvision@hikvision.com	李义		报告期内公司无收购及出售资产、吸收合并事项	120.2098029477	30.1843779438	120.1464240034	30.2820011384	陈宗年	安防视频监控产品研发、生产和销售，产品包括硬盘录像机（DVR）、视音频编解码卡等数据存储及处理设备，以及监控摄像机、监控球机、视频服务器（DVS）等视音频信息采集处理设备	4068772253	安防产品的研发、生产和销售。产品提供 的劳务主要有：硬盘录像机、视音频编解码卡、视频服务器、监控摄像机、监控球机、道路卡口等产品， 以及安防工程施工等劳务。	hikvision@hikvision.com		www.hikvision.com	CNE100000PM8
102440	002415	海康威视	2016-12-31	杭州海康威视数字技术股份有限公司	计算机、通信和其他电子设备制造业	C39	浙江省杭州市滨江区阡陌路555号	浙江省杭州市滨江区阡陌路555号	2001-11-30	2010-05-28	浙江省	杭州市	310051	黄方红	0571-89710492	0571-89986895	hikvision@hikvision.com	李义	91330000733796106P	报告期内公司无收购及出售资产、吸收合并事项	120.2208154	30.2112797932	120.2207514	30.2100167932	陈宗年	安防视频监控产品研发、生产和销售，产品包括硬盘录像机（DVR）、视音频编解码卡等数据存储及处理设备，以及监控摄像机、监控球机、视频服务器（DVS）等视音频信息采集处理设备	6102706885	电子产品(含防爆电气产品、通信设备及其辅助设备、多媒体设备)的研发、生产;销售自产产品;提供技术服务,电子设备安装,电子工程及智能系统工程的设计、施工及维护。	hikvision@hikvision.com		www.hikvision.com	CNE100000PM8
102440	002415	海康威视	2017-12-31	杭州海康威视数字技术股份有限公司	计算机、通信和其他电子设备制造业	C39	浙江省杭州市滨江区阡陌路555号	浙江省杭州市滨江区阡陌路555号	2001-11-30	2010-05-28	浙江省	杭州市	310051	黄方红	0571-89710492	0571-89986895	hikvision@hikvision.com	李义	91330000733796106P	报告期内公司无收购及出售资产、吸收合并事项	120.2208154	30.2112797932	120.2207514	30.2100167932	陈宗年	安防视频监控产品研发、生产和销售，产品包括硬盘录像机（DVR）、视音频编解码卡等数据存储及处理设备，以及监控摄像机、监控球机、视频服务器（DVS）等视音频信息采集处理设备	9228865114	电子产品(含防爆电气产品、通信设备及其辅助设备、多媒体设备)、飞行器、机器人、智能装备、汽车零部件及配件、车用电气信号设备装置的研发、生产;销售自产产品;提供技术服务,电子技术咨询服务,培训服务(不含办班培训),电子设备安装,电子工程及智能系统工程的设计、施工及维护。	hikvision@hikvision.com		www.hikvision.com	CNE100000PM8
102440	002415	海康威视	2018-12-31	杭州海康威视数字技术股份有限公司	计算机、通信和其他电子设备制造业	C39	浙江省杭州市滨江区阡陌路555号	浙江省杭州市滨江区物联网街518号	2001-11-30	2010-05-28	浙江省	杭州市	310051	黄方红	0571-88075998,89710492	0571-89986895	hikvision@hikvision.com		91330000733796106P	报告期内公司无收购及出售资产、吸收合并事项	120.2210554	30.2083487932	120.2207514	30.2100167932	陈宗年	安防视频监控产品研发、生产和销售，产品包括硬盘录像机（DVR）、视音频编解码卡等数据存储及处理设备，以及监控摄像机、监控球机、视频服务器（DVS）等视音频信息采集处理设备	9227270473	电子产品(含防爆电气产品、通信设备及其辅助设备、多媒体设备)、消防产品、飞行器、机器人、智能装备、汽车零部件及配件、车用电气信号设备装置的研发、生产;销售自产产品;提供技术服务,电子技术咨询服务,培训服务(不含办班培训),电子设备安装,电子工程及智能系统工程的设计、施工及维护。	hikvision@hikvision.com		www.hikvision.com	CNE100000PM8
102592	002422	科伦药业	2015-12-31	四川科伦药业股份有限公司	医药制造业	C27	四川省成都市新都卫星城工业开发区南二路	四川省成都市青羊区百花西路36号	2002-05-29	2010-06-03	四川省	成都市	610071	冯昊	028-82860678	028-86132515	fengh@kelun.com	黄新		报告期内公司无收购及出售资产、吸收合并事项	104.0377924402	30.656533416	104.0941888986	30.771320098	刘革新	从事研究、开发及生产共计96个品种、219种规格的大输液产品	1440000000	研究、生产大容量注射剂，销售自产产品；直立式聚丙烯输液袋的技术开发、生产；生产、销售：原料药 (在许可证有效范围内生产销售) ；制造、销售：硬胶囊剂、颗粒剂、散剂、软胶囊剂、片剂、滴丸剂、抗生素中间体；生产销售玻璃输液瓶、医药包装瓶；经营本企业自产产品及技术的出口业务；经营本企业生产所需的原辅材料、仪器仪表、机械设备、零配件及技术的进口业务 (国家限定经营和禁止进出口的商品及技术除外) ；经营进料加工和“三来一补”业务；生产经营新型药品包装材料、容器、新型软包装大输液，制剂、消毒剂，研究开发化学药、中药、保健品；生产销售无菌原料药、粉针剂 (头孢菌素类) 、销售化工原料 (危险化学品除外) ；制造、销售橡胶制品、塑料制品；国家允许经营的进出口贸易；美洲大蠊的养殖、销售及养殖技术咨询服务；医药生物技术、医用材料、医用器械、试剂、药品的研究开发，保健用品、化妆品的研究开发、成果转让及以上项目…	kelun@kelun.com		www.kelun.com	CNE100000PW7
102592	002422	科伦药业	2017-12-31	四川科伦药业股份有限公司	医药制造业	C27	四川省成都市新都卫星城工业开发区南二路	四川省成都市青羊区百花西路36号	2002-05-29	2010-06-03	四川省	成都市	610071	冯昊	028-82860516,82860678	028-86132515	fengh@kelun.com	黄新	9151010020260067X4	报告期内公司无收购及出售资产、吸收合并事项	104.0377924402	30.656533416	104.0941888986	30.771320098	刘革新	从事研究、开发及生产共计96个品种、219种规格的大输液产品	1440000000	研究、生产大容量注射剂销售自产产品;直立式聚丙烯输液袋的技术开发、生产;生产、销售:原料药(在许可证有效范围内生产销售);制造、销售:硬胶囊剂、颗粒剂、散剂、软胶囊剂、片剂、滴丸剂、抗生素中间体;生产销售玻璃输液瓶、医药包装瓶;经营本企业自产产品及技术的出口业务;经营本企业生产所需的原辅材料、仪器仪表、机械设备、零配件及技术的进口业务(国家限定经营和禁止进出口的商品及技术除外);经营进料加工和“三来一补”业务;生产经营新型药品包装材料、容器、新型软包装大输液制剂、消毒剂研究开发化学药、中药、保健品;生产销售无菌原料药、粉针剂(头孢菌素类)、销售化工原料(危险化学品除外);制造、销售橡胶制品、塑料制品;国家允许经营的进出口贸易;美洲大蠊的养殖、销售及养殖技术咨询服务;医药生物技术、医用材料、医用器械、试剂、药品的研究开发保健用品、化妆品的研究开发、成果转让及以上项目的技术咨询服务;医药项目…	kelun@kelun.com		www.kelun.com	CNE100000PW7
102592	002422	科伦药业	2018-12-31	四川科伦药业股份有限公司	医药制造业	C27	四川省成都市新都卫星城工业开发区南二路	四川省成都市青羊区百花西路36号	2002-05-29	2010-06-03	四川省	成都市	610071	冯昊	028-82860516,82860678	028-86132515	fengh@kelun.com	黄新	9151010020260067X4	报告期内公司无收购及出售资产、吸收合并事项	104.0377924402	30.656533416	104.0941888986	30.771320098	刘革新	从事研究、开发及生产共计96个品种、219种规格的大输液产品	1439845500	研究、生产大容量注射剂,销售自产产品;直立式聚丙烯输液袋的技术开发、生产;生产、销售:原料药(在许可证有效范围内生产销售);制造、销售:硬胶囊剂、颗粒剂、散剂、软胶囊剂、片剂、滴丸剂、抗生素中间体;生产销售玻璃输液瓶、医药包装瓶;经营本企业自产产品及技术的出口业务;经营本企业生产所需的原辅材料、仪器仪表、机械设备、零配件及技术的进口业务(国家限定经营和禁止进出口的商品及技术除外);经营进料加工和“三来一补”业务;生产经营新型药品包装材料、容器、新型软包装大输液,制剂、消毒剂,研究开发化学药、中药、保健品;生产销售无菌原料药、粉针剂(头孢菌素类)、销售化工原料(危险化学品除外);制造、销售橡胶制品、塑料制品;国家允许经营的进出口贸易;美洲大蠊的养殖、销售及养殖技术咨询服务;医药生物技术、医用材料、医用器械、试剂、药品的研究开发,保健用品、化妆品的研究开发、成果转让及以上项目的技术咨询服务;…	kelun@kelun.com		www.kelun.com	CNE100000PW7
102580	002424	贵州百灵	2016-12-31	贵州百灵企业集团制药股份有限公司	医药制造业	C27	贵州省安顺市经济技术开发区西航大道	贵州省安顺市经济技术开发区西航大道	1999-03-25	2010-06-03	贵州省	安顺市	561000	牛民	0851-33415126	0851-33412296	niumin1804@126.com	陈智	91520400215650676U	报告期内公司无收购及出售资产、吸收合并事项	105.8762236603	26.2230305714	105.9171235148	26.2429689426	姜伟	以苗药为主的中成药的生产、销售	1411200000	片剂、胶囊剂、糖浆剂、软胶囊剂、颗粒剂、丸剂、散剂、喷雾剂、煎膏剂、酊剂、滴丸剂、原料药(岩白菜素)、大容量注射剂(含中药提取);生产销售预包装食品;卫生用品类生产(皮肤、粘膜卫生用品);保健食品生产加工(片剂[糖]、颗粒剂、口服液、酒剂);生产糖果制品(糖果);中药材种植(国家有专项规定的除外);市场营销策划;设计、制作、发布、代理国内外各类广告(国家规定须取得专项审批的取得审批后才能从事经营活动);市场推广宣传;市场调查与研究;文化学术交流、营销管理;化妆品销售(国家有专项规定的除外)。	blzy@gzbl.com		www.gzbl.com	CNE100000PY3
102645	002426	胜利精密	2016-12-31	苏州胜利精密制造科技股份有限公司	计算机、通信和其他电子设备制造业	C39	江苏省苏州市高新区浒关工业园浒泾路55号	江苏省苏州市高新区浒关工业园浒泾路55号	2008-07-17	2010-06-08	江苏省	苏州市	215151	殷勤	0512-69207028	0512-69207028	Renee.Yin@vicsz.com	程晔	91320500756428744L	报告期内公司无收购及出售资产、吸收合并事项	120.5329013065	31.3798327967	120.5337823065	31.3786917967	高玉根	精密结构模组的研发、设计、生产和后续改进等全流程服务	3421275069	许可经营项目:无。一般经营项目:研发、生产、销售:冲压件、金属结构件、模具、五金配件、低压电器、注塑件、喷涂、触摸屏、减反射镀膜玻璃;研发、销售:玻璃制品、铝合金零部件、液晶显示模组、电子元器件、油墨、涂料、通讯产品、计算机软硬件、计算系统集成产品、数码产品、机电设备及配件、物流设备、电脑及周边产品、(电动、气动和手动)工具、量具;销售:金属材料、塑料材料、电子产品、产品说明书(不含印刷);自营和代理各类商品的进出口业务(国家限定企业经营或禁止进出口的商品除外)(依法须经批准的项目,经相关部门批准后方可开展经营活动)。	zhengquan@vicsz.com		www.vicsz.com	CNE100000Q01
101931	002450	康得新	2015-12-31	江苏康得新复合材料股份有限公司	橡胶和塑料制品业	C29	江苏省张家港市环保新材料产业园晨港路北侧,港华路西侧	江苏省张家港市环保新材料产业园晨港路北侧,港华路西侧	2001-08-21	2010-07-16	江苏省	张家港市	215634	杜文静	010-89710777	010-80107261-6218	kdx@kdxfilm.com	王山	91320000600091495G	报告期内公司无收购及出售资产、吸收合并事项	120.4771230153	31.9399101037	120.4769920153	31.9398921037	钟玉	预涂膜及覆膜设备的开发、生产和销售。	1608735458	从事高分子复合材料、功能膜材料、预涂膜、光学膜、光电新材料、化工产品（不 含危险化学品）、印刷器材和包装器材的研发，并提供相关技术咨询和技术服务；从事上述产品的批发以 及进出口业务。（依法须经批准的项目，经相关部门批准后方可开展经营活动）。 本公司提供的主要产品：预涂膜、光学膜、BOPP膜、覆膜机等。	kdx@kdxfilm.com		www.kangdexin.com	CNE100000RN2
101931	002450	康得新	2016-12-31	康得新复合材料集团股份有限公司	橡胶和塑料制品业	C29	江苏省张家港市环保新材料产业园晨港路北侧、港华路西侧	江苏省张家港市环保新材料产业园晨港路北侧、港华路西侧	2001-08-21	2010-07-16	江苏省	张家港市	215634	杜文静	010-82282777	010-80107261-6218	kdx@kdxfilm.com	王山	91320000600091495G	出售重大股权情况:交易对方:山东泗水康得新复合材料有限公司;杭州康得新机械有限公司;被出售股权:100.00%;51.22%;出售日:2016年06月30日;2016年06月30日;交易价格(万元):47,059.11;1,864.61;本期初起至出售日该股权为上市公司贡献的净利润(万元):-2,260.14;-1.49;出售对公司的影响:对公司的业务连续性、管理层稳定性无影响;对公司的业务连续性、管理层稳定性无影响;股权出售为上市公司贡献的净利润占净利润总额的比例:1.98%;-0.15%;股权出售定价原则:目标公司在2015年12月31日基准日的评估后股权价值;目标公司在2015年12月31日基准日的评估后股权价值;是否为关联交易:否;否;与交易对方的关联关系:无;无;所涉及的股权是否已全部过户:是;是;是否按计划如期实施,如未按计划实施,应当说明原因及公司已采取的措施:是;是;披露…	120.4771230153	31.9399101037	120.4769920153	31.9398921037	钟玉	预涂膜及覆膜设备的开发、生产和销售。	3528782028	从事高分子复合材料、功能膜材料、预涂膜、光学膜、光电新材料、化工产品(不含危险化学品)、印刷器材和包装器材的研发,并提供相关技术咨询和技术服务;从事上述产品的批发以及进出口业务。(依法须经批准的项目,经相关部门批准后方可开展经营活动)。本公司提供的主要产品:预涂膜、光学膜等。	kdx@kdxfilm.com		www.kangdexin.com	CNE100000RN2
101931	002450	康得新	2017-12-31	康得新复合材料集团股份有限公司	橡胶和塑料制品业	C29	江苏省张家港市环保新材料产业园晨港路北侧、港华路西侧	江苏省张家港市环保新材料产业园晨港路北侧、港华路西侧	2001-08-21	2010-07-16	江苏省	张家港市	215634	杜文静	010-84369638	010-80107261-6218	kdx@kdxfilm.com	王山	91320000600091495G	报告期内公司无收购及出售资产、吸收合并事项	120.4771230153	31.9399101037	120.4769920153	31.9398921037	钟玉	预涂膜及覆膜设备的开发、生产和销售。	3538598582	从事高分子复合材料、功能膜材料、预涂膜、光学膜、光电新材料、化工产品(不含危险化学品)、印刷器材和包装器材的研发,并提供相关技术咨询和技术服务;电子产品的研发、销售及委托区外企业加工,自有房屋、机械设备租赁,自营和代理各类商品及技术的进出口业务(国家限定公司经营或禁止进出口的商品及技术除外)。(依法须经批准的项目,经相关部门批准后方可开展经营活动)。本公司提供的主要产品:预涂膜、光学膜等。	kdx@kdxfilm.com		www.kangdexin.com	CNE100000RN2
102176	002456	欧菲科技	2015-12-31	深圳欧菲光科技股份有限公司	计算机、通信和其他电子设备制造业	C39	广东省深圳市光明新区公明街道松白公路华发路段欧菲光科技园	广东省深圳市光明新区公明街道松白公路华发路段欧菲光科技园	2001-03-12	2010-08-03	广东省	深圳市	518106	肖燕松	0755-27555331	0755-27545688	ofkj@o-film.com	程晓黎		报告期内公司无收购及出售资产、吸收合并事项	113.9020589804	22.7689408208	113.9022249804	22.7691988208	蔡荣军	精密光电薄膜元器件的研发、生产和销售	1030612000	触控显示类业务、摄像通讯类业务和生物识别类业务。主要产品或服务为触摸屏、摄像头模组、红外 截止滤光片及镜座组件、光纤头镀膜及其他精密光电薄膜元器件。	ofkj@o-film.com		www.o-film.com	CNE100000S33
102176	002456	欧菲科技	2016-12-31	深圳欧菲光科技股份有限公司	计算机、通信和其他电子设备制造业	C39	广东省深圳市光明新区公明街道松白公路华发路段欧菲光科技园	广东省深圳市光明新区公明街道松白公路华发路段欧菲光科技园	2001-03-12	2010-08-03	广东省	深圳市	518106	肖燕松	0755-27555331	0755-27545688	ofkj@o-film.com	程晓黎	914403007261824992	报告期内公司无收购及出售资产、吸收合并事项	113.9020609804	22.7689418208	113.9022249804	22.7691988208	蔡荣军	精密光电薄膜元器件的研发、生产和销售	1086266390	主要开发、生产经营光电器件、光学零件及系统设备,光网络、光通讯零部件及系统设备,电子专用设备仪器,并提供相关系统集成、技术开发和技术咨询服务;新型电子元器件、光电子元器件、新型显示器件及其关键件研发、销售和技术服务。	ofkj@o-film.com		www.o-film.com	CNE100000S33
102176	002456	欧菲科技	2017-12-31	欧菲科技股份有限公司	计算机、通信和其他电子设备制造业	C39	广东省深圳市光明新区公明街道松白公路华发路段欧菲光科技园	广东省深圳市南山区蛇口望海路1166号招商局广场1号楼13层	2001-03-12	2010-08-03	广东省	深圳市	518067	肖燕松	0755-27555331	0755-27545688	ofkj@o-film.com	周亮	914403007261824992	报告期内公司无收购及出售资产、吸收合并事项	113.91614193	22.48139966	113.9022249804	22.7691988208	蔡荣军	精密光电薄膜元器件的研发、生产和销售	2714445975	主要开发、生产经营光电器件、光学零件及系统设备,光网络、光通讯零部件及系统设备,电子专用设备仪器,并提供相关系统集成、技术开发和技术咨询服务;新型电子元器件、光电子元器件、新型显示器件及其关键件研发、销售和技术服务。	ofkj@o-film.com		www.o-film.com	CNE100000S33
102176	002456	欧菲科技	2018-12-31	欧菲光集团股份有限公司	计算机、通信和其他电子设备制造业	C39	广东省深圳市光明新区公明街道松白公路华发路段欧菲光科技园	广东省深圳市南山区蛇口望海路1166号招商局广场1号楼13层	2001-03-12	2010-08-03	广东省	深圳市	518067	肖燕松	0755-27555331	0755-27545688	ir@ofilm.com	周亮	914403007261824992	报告期内公司无收购及出售资产、吸收合并事项	113.91614193	22.48139966	113.9022249804	22.7691988208	蔡荣军	精密光电薄膜元器件的研发、生产和销售	2712867125	开发、生产经营光电器件、光学零件及系统设备,光网络、光通讯零部件及系统设备,电子专用设备仪器,并提供相关系统集成、技术开发和技术咨询服务;新型电子元器件、光电子元器件、新型显示器件及其关键件研发、销售和技术服务	ir@ofilm.com		www.ofilm.com	CNE100000S33
102105	002460	赣锋锂业	2017-12-31	江西赣锋锂业股份有限公司	有色金属冶炼及压延加工业	C32	江西省新余市经济开发区龙腾路	江西省新余市经济开发区龙腾路	2000-03-02	2010-08-10	江西省	新余市	338000	欧阳明	0790-6415606	0790-6860528	ouyangming@ganfenglithium.com		91360500716575125F	报告期内公司无收购及出售资产、吸收合并事项	114.9800190655	27.8267729386	114.992337502	27.8351206692	李良彬	深加工锂产品的研究、开发、生产与销售。	741771379	锂、铷、铯系列产品、正丁基锂、锂化合物的生产销售;研发、生产、销售锂电池、可充性电池、便携式电子产品、锂电保护装置、充电器、锂电电池组等;锂电新材料系列产品研发、技术咨询、技术转移、信息化应用服务;再生锂资源及其他废旧有色金属的回收、销售;锂矿开采、精选,长石、云母、铌钽销售;普通货物运输和危险品货物运输等。	info@ganfenglithium.com		www.ganfenglithium.com	CNE100000SF6
102105	002460	赣锋锂业	2018-12-31	江西赣锋锂业股份有限公司	有色金属冶炼及压延加工业	C32	江西省新余市经济开发区龙腾路	江西省新余市经济开发区龙腾路	2000-03-02	2010-08-10	江西省	新余市	338000	欧阳明	0790-6415606	0790-6860528	ouyangming@ganfenglithium.com		91360500716575125F	报告期内公司无收购及出售资产、吸收合并事项	114.9800190655	27.8267729386	114.992337502	27.8351206692	李良彬	深加工锂产品的研究、开发、生产与销售。	1315081930	锂、铷、铯系列产品、正丁基锂、锂化合物的生产销售;研发、生产、销售锂电池、可充性电池、便携式电子产品、锂电保护装置、充电器、锂电电池组等;锂电新材料系列产品研发、技术咨询、技术转移、信息化应用服务;再生锂资源及其他废旧有色金属的回收、销售;锂矿勘探及开采销售;普通货物运输和危险品货物运输等。	info@ganfenglithium.com	01772	www.ganfenglithium.com	CNE100000SF6
102651	002465	海格通信	2015-12-31	广州海格通信集团股份有限公司	计算机、通信和其他电子设备制造业	C39	广东省广州市高新技术产业开发区科学城海云路88号	广东省广州市高新技术产业开发区科学城海云路88号	2007-07-20	2010-08-31	广东省	广州市	510663	谭伟明	020-38699138	020-38698028	hgzqb@haige.com	王天霞		报告期内公司无收购及出售资产、吸收合并事项	113.4475486541	23.1438790356	113.4467024041	23.1459637126	杨海洲	通信设备、导航设备的研制、生产、销售和服务。	2145751654	开发与研究无线通信、导航、网络信息、光通信、移动通信、卫 星通信、雷达、频谱监测、电子元器件、计算机软件、自动控制设备的技术；生产、销售：计算机软硬件、通信设备、电子 产品、导航设备；通信系统工程、导航系统的安装、设计、技术咨询、技术服务；批发和零售贸易、货物进出口、技术进出 口（法律、行政法规禁止的项目除外；法律、行政法规限制的项目须取得许可后方可经营）；房屋租赁。	hgzqb@haige.com		www.haige.com	CNE100000T24
102651	002465	海格通信	2016-12-31	广州海格通信集团股份有限公司	计算机、通信和其他电子设备制造业	C39	广东省广州市高新技术产业开发区科学城海云路88号	广东省广州市高新技术产业开发区科学城海云路88号	2007-07-20	2010-08-31	广东省	广州市	510663	谭伟明	020-38699138	020-38698028	hgzqb@haige.com	王天霞	91440101724308182L	报告期内公司无收购及出售资产、吸收合并事项	113.4475486541	23.1438790356	113.4467024041	23.1459637126	杨海洲	通信设备、导航设备的研制、生产、销售和服务。	2145751654	开发与研究无线通信、导航、网络信息、光通信、移动通信、卫星通信、雷达、频谱监测、电子元器件、计算机软件、自动控制设备的技术;生产、销售:计算机软硬件、通信设备、电子产品、导航设备;通信系统工程、导航系统的安装、设计、技术咨询、技术服务;批发和零售贸易、货物进出口、技术进出口(法律、行政法规禁止的项目除外;法律、行政法规限制的项目须取得许可后方可经营);房屋租赁。	hgzqb@haige.com		www.haige.com	CNE100000T24
101938	002466	天齐锂业	2016-12-31	天齐锂业股份有限公司	有色金属冶炼及压延加工业	C32	四川省遂宁市射洪县太和镇城北	四川省成都市高朋东路10号	1995-10-16	2010-08-31	四川省	遂宁市	610041	李波	028-85183501	028-85183501	libo@tianqilithium.com	付旭梅	91510900206360802D	出售重大股权情况;交易对方:天齐集团;被出售股权:天齐矿业;出售日:2016年08月13日;交易价格(万元):8,505.60;本期初起至出售日该股权为上市公司贡献的净利润(万元):-15.28;出售对公司的影响:无重大影响;股权出售为上市公司贡献的净利润占净利润总额的比例:0.01%;股权出售定价原则:评估价格;是否为关联交易:是;与交易对方的关联关系:母公司;所涉及的股权是否已全部过户:是;是否按计划如期实施,如未按计划实施,应当说明原因及公司已采取的措施:是;披露日期:2016年06月29日;披露索引:公司披露于巨潮资讯网(www.cninfo.com.cn)的《关于向控股股东转让全资子公司全部股权暨关联交易的公告》	104.0406424102	30.6215698506	105.3866252384	30.8772287991	蒋卫平	从事工业级碳酸锂、电池级碳酸锂、无水氯化锂、氢氧化锂等锂系列产品的研发、生产和销售。	994422200	主营:制造、销售:电池级碳酸锂、工业级碳酸锂及其锂系列产品、其他化工产品(国家有专项规定除外)。兼营:经营本企业生产、科研所需的原辅材料,机械设备,仪器仪表零配件及相关技术的进出口业务;经营本企业自产的电池级碳酸锂、工业级碳酸锂及其锂系列产品的出口业务;矿石(不含煤炭、稀贵金属)及锂系列产品的加工业务。(依法须经批准的项目,经相关部门批准后方可开展经营活动)	likunda@tqmmm.com.cn		www.tianqilithium.com	CNE100000T32
101938	002466	天齐锂业	2017-12-31	天齐锂业股份有限公司	有色金属冶炼及压延加工业	C32	四川省遂宁市射洪县太和镇城北	四川省成都市高朋东路10号	1995-10-16	2010-08-31	四川省	遂宁市	610041	李波	028-85183501	028-85183501	libo@tianqilithium.com	付旭梅	91510900206360802D	报告期内公司无收购及出售资产、吸收合并事项	104.0406424102	30.6215698506	105.3866252384	30.8772287991	蒋卫平	从事工业级碳酸锂、电池级碳酸锂、无水氯化锂、氢氧化锂等锂系列产品的研发、生产和销售。	1142052851	主营:制造、销售:电池级碳酸锂、工业级碳酸锂及其锂系列产品、其他化工产品(国家有专项规定除外)。兼营:经营本企业生产、科研所需的原辅材料,机械设备,仪器仪表零配件及相关技术的进出口业务;经营本企业自产的电池级碳酸锂、工业级碳酸锂及其锂系列产品的出口业务;矿石(不含煤炭、稀贵金属)及锂系列产品的加工业务。(依法须经批准的项目,经相关部门批准后方可开展经营活动)	likunda@tqmmm.com.cn		www.tianqilithium.com	CNE100000T32
101938	002466	天齐锂业	2018-12-31	天齐锂业股份有限公司	有色金属冶炼及压延加工业	C32	四川省遂宁市射洪县太和镇城北	四川省成都市高朋东路10号	1995-10-16	2010-08-31	四川省	遂宁市	610041	李波	028-85183501	028-85183501	libo@tianqilithium.com	付旭梅	91510900206360802D	报告期内公司无收购及出售资产、吸收合并事项	104.0406424102	30.6215698506	105.3866252384	30.8772287991	蒋卫平	从事工业级碳酸锂、电池级碳酸锂、无水氯化锂、氢氧化锂等锂系列产品的研发、生产和销售。	1142052851	主营:制造、销售:电池级碳酸锂、工业级碳酸锂及其锂系列产品、其他化工产品(国家有专项规定除外)。兼营:经营本企业生产、科研所需的原辅材料,机械设备,仪器仪表零配件及相关技术的进出口业务;经营本企业自产的电池级碳酸锂、工业级碳酸锂及其锂系列产品的出口业务;矿石(不含煤炭、稀贵金属)及锂系列产品的加工业务。(依法须经批准的项目,经相关部门批准后方可开展经营活动)	likunda@tqmmm.com.cn		www.tianqilithium.com	CNE100000T32
101954	002468	申通快递	2017-12-31	申通快递股份有限公司	邮政业	G60	浙江省玉环市机电工业园区	上海市青浦区重固镇北青公路6598弄25号	2001-11-01	2010-09-08	浙江省	玉环市	201706	陈泉	021-60376669	021-60376600	ir@sto.cn	余志强	913300007324299960	报告期内公司无收购及出售资产、吸收合并事项	121.1915413079	31.1912803215	120.1528078534	30.2674698534	陈德军	快递服务	1530802166	国内快递(邮政企业专营业务除外),普通货运(除危险化学品),国际、国内货物运输代理(除危险化学品),报关服务,仓储服务(除危险化学品)。	Idc_security@idcgroup.com.cn		www.sto.cn	CNE100000T99
101954	002468	申通快递	2018-12-31	申通快递股份有限公司	邮政业	G60	浙江省玉环市机电工业园区	上海市青浦区重固镇北青公路6598弄25号	2001-11-01	2010-09-08	浙江省	玉环市	201706	陈泉	021-60376669	021-60376600	ir@sto.cn	余志强	913300007324299960	出售重大股权情况:交易对方:深圳玮荣企业发展有限公司;被出售股权:深圳市丰巢科技有限公司9.0948%的股权;出售日:2018年06月14日;交易价格(万元):81853;本期初起至出售日该股权为上市公司贡献的净利润(万元):29800;出售对公司的影响:本次交易是基于公司商业化考虑,实现合理的投资收益,进一步优化公司资产结构,提高运营和管理效率;本次交易完成后,公司可将股权转让所得投入到快递业务板块的主业上,有利于公司进一步聚焦主业,促进公司良性、健康发展,符合公司及股东的长远利益;股权出售定价原则:鉴于丰巢科技于2018年1月完成最近一轮融资的投后估值为90亿人民币(详见公司于2018年1月23日在巨潮资讯网上披露的《关于全资子公司对深圳市丰巢科技有限公司增资的公告》)(公告编号:2018-005),因本次股权转让较上次间隔时间短,根据最近市场可比交易以及丰巢科技的业务发展情况,转让…	121.1915413079	31.1912803215	120.1528078534	30.2674698534	陈德军	快递服务	1530802166	国内快递(邮政企业专营业务除外),普通货运(除危险化学品),国际、国内货物运输代理(除危险化学品),报关服务,仓储服务(除危险化学品)。	Idc_security@idcgroup.com.cn		www.sto.cn	CNE100000T99
102207	002470	金正大	2015-12-31	金正大生态工程集团股份有限公司	化学原料及化学制品制造业	C26	山东省临沂市临沭县兴大西街19号	山东省临沂市临沭县兴大西街19号	1998-08-26	2010-09-08	山东省	临沂市	276700	崔彬	0539-7198691	0539-6088691	jzd@kingenta.com	杨春菊	913713007060665387	报告期内公司无收购及出售资产、吸收合并事项	118.6135200873	34.9110920743	118.6163803373	34.9107077443	万连步	复合肥、控释肥的生产和销售。	1567606898	研发、生产、销售各类农用肥料、原材料及提供相关许 可范围内的资讯服务。主要产品包括普通复合肥、控释复合肥、硝基复合肥、水溶性肥料四大类。	jzd@kingenta.com		www.kingenta.com	CNE100000TC1
102207	002470	金正大	2016-12-31	金正大生态工程集团股份有限公司	化学原料及化学制品制造业	C26	山东省临沂市临沭县兴大西街19号	山东省临沂市临沭县兴大西街19号	1998-08-26	2010-09-08	山东省	临沂市	276700	崔彬	0539-7198691	0539-6088691	jzd@kingenta.com	杨春菊	913713007060665387	报告期内公司无收购及出售资产、吸收合并事项	118.6135200873	34.9110920743	118.6163803373	34.9107077443	万连步	复合肥、控释肥的生产和销售。	3146218046	研发、生产、销售各类农用肥料、原材料及提供相关许可范围内的咨询服务。主要产品包括普通复合肥、控释复合肥、硝基复合肥、水溶性肥料四大类。	jzd@kingenta.com		www.kingenta.com	CNE100000TC1
102207	002470	金正大	2017-12-31	金正大生态工程集团股份有限公司	化学原料及化学制品制造业	C26	山东省临沂市临沭县兴大西街19号	山东省临沂市临沭县兴大西街19号	1998-08-26	2010-09-08	山东省	临沂市	276700	崔彬	0539-7198691	0539-6088691	jzd@kingenta.com	杨春菊	913713007060665387	报告期内公司无收购及出售资产、吸收合并事项	118.6135200873	34.9110920743	118.6163803373	34.9107077443	万连步	复合肥、控释肥的生产和销售。	3157838096	研发、生产、销售各类农用肥料、原材料及提供相关许可范围内的咨询服务。主要产品包括普通复合肥、控释复合肥、硝基复合肥、水溶性肥料四大类。	jzd@kingenta.com		www.kingenta.com	CNE100000TC1
102129	002475	立讯精密	2015-12-31	立讯精密工业股份有限公司	计算机、通信和其他电子设备制造业	C39	广东省深圳市宝安区沙井街道蚝一西部三洋新工业区A栋2层	广东省东莞市清溪镇青皇村青皇工业区葵青路17号	2004-05-24	2010-09-15	广东省	深圳市	523650	李雄伟	0769-87892475	0769-87732475	Nick.li@luxshare-ict.com	李锐豪		报告期内公司无收购及出售资产、吸收合并事项	114.1726913841	22.8001436531	113.8303047162	22.7353782508	王来春	连接器的研发、生产和销售	1257476660	生产经营连接线、连接器、电脑周边设备、塑胶五金制品。	Public@luxshare-ict.com		www.luxshare-ict.com	CNE100000TP3
102129	002475	立讯精密	2016-12-31	立讯精密工业股份有限公司	计算机、通信和其他电子设备制造业	C39	广东省深圳市宝安区沙井街道蚝一西部三洋新工业区A栋2层	广东省东莞市清溪镇青皇村青皇工业区葵青路17号	2004-05-24	2010-09-15	广东省	深圳市	523650	李雄伟	0769-87892475	0769-87732475	Nick.Li@luxshare-ict.com	李锐豪	91440300760482233Q	报告期内公司无收购及出售资产、吸收合并事项	114.1726913841	22.8001436531	113.8303047162	22.7353782508	王来春	连接器的研发、生产和销售	2120058632	生产经营连接线、连接器、电脑周边设备、塑胶五金制品。	Public@luxshare-ict.com		www.luxshare-ict.com	CNE100000TP3
102129	002475	立讯精密	2017-12-31	立讯精密工业股份有限公司	计算机、通信和其他电子设备制造业	C39	广东省深圳市宝安区沙井街道蚝一西部三洋新工业区A栋2层	广东省东莞市清溪镇青皇村青皇工业区葵青路17号	2004-05-24	2010-09-15	广东省	深圳市	523650	黄大伟	0769-87892475	0769-87732475	David.Huang@luxshare-ict.com	李锐豪	91440300760482233Q	报告期内公司无收购及出售资产、吸收合并事项	114.1726913841	22.8001436531	113.8303047162	22.7353782508	王来春	连接器的研发、生产和销售	3172962197	生产经营连接线、连接器、电脑周边设备、塑胶五金制品。	Public@luxshare-ict.com		www.luxshare-ict.com	CNE100000TP3
102129	002475	立讯精密	2018-12-31	立讯精密工业股份有限公司	计算机、通信和其他电子设备制造业	C39	广东省深圳市宝安区沙井街道蚝一西部三洋新工业区A栋2层	广东省东莞市清溪镇青皇村青皇工业区葵青路17号	2004-05-24	2010-09-15	广东省	深圳市	523650	黄大伟	0769-87892475	0769-87732475	David.Huang@luxshare-ict.com	李锐豪	91440300760482233Q	出售重大股权情况:交易对方:深圳市景旺电子股份有限公司;被出售股权:珠海景旺柔性电路有限公司51%股权(原名:珠海双赢柔软电路有限公司);出售日:2018年09月19日;交易价格(万元):28958.54;本期初起至出售日该股权为上市公司贡献的净利润(万元):-7889.5;出售对公司的影响:优化资产结构;股权出售为上市公司贡献的净利润占净利润总额的比例:2.90%;股权出售定价原则:以2018年6月30日审计报告之净资产作为依据;是否为关联交易:否;与交易对方的关联关系:无;所涉及的股权是否已全部过户:是;是否按计划如期实施,如未按计划实施,应当说明原因及公司已采取的措施:是;披露日期:2018年09月20日;披露索引:巨潮资讯网(http://www.cninfo.com.cn),公告编号:2018-057	114.1726913841	22.8001436531	113.8303047162	22.7353782508	王来春	连接器的研发、生产和销售	4114616722	生产经营连接线、连接器、电脑周边设备、塑胶五金制品	Public@luxshare-ict.com		www.luxshare-ict.com	CNE100000TP3
102453	002493	荣盛石化	2018-12-31	荣盛石化股份有限公司	化学纤维制造业	C28	浙江省杭州市萧山区益农镇红阳路98号	浙江省杭州市萧山区益农镇浙江荣盛控股集团大楼	2007-06-18	2010-11-02	浙江省	杭州市	311247	全卫英	0571-82520189	0571-82527208-8150	qwy@rong-sheng.com	胡阳阳	91330000255693873W	报告期内公司无收购及出售资产、吸收合并事项	120.5900453521	30.2026041886	120.5949753521	30.1961551886	李水荣	PTA、聚酯纤维相关产品的生产和销售	6291107750	涤纶丝,化纤布的制造、加工,纸制品加工,轻纺原料及产品,五金,化工产品及原料(除化学危险品及易制毒化学品)的销售,实业投资,普通货物的仓储服务(不含危险品),道路货物运输(凭有效许可证经营),经营进出口业务。(依法须经批准的项目,经相关部门批准后方可开展经营活动)。主要产品:芳烃、PTA、聚酯切片及涤纶丝。	rspc@cnrspc.com		www.cnrspc.com	CNE100000W60
103137	002500	山西证券	2015-12-31	山西证券股份有限公司	资本市场服务	J67	山西省太原市府西街69号山西国际贸易中心东塔楼	山西省太原市府西街69号山西国际贸易中心东塔楼	1988-07-28	2010-11-15	山西省	太原市	030002	王怡里	0351-8686668	0351-8686918	wangyili@i618.com.cn	梁颖新	91140000110013881E	报告期内公司无收购及出售资产、吸收合并事项	112.55718037	37.8741842952	112.55759937	37.8742142952	侯巍	证券经纪、证券自营、资产管理、投资银行、财务顾问等证券相关业务。	2828725153	证券经纪业务、融 资融券业务、证券自营业务、证券承销业务、证券投资咨询、与证券交易、证券 投资活动有关的财务顾问、证券投资基金代销、为期货公司提供中间介绍业务、 代销金融产品、受托资产管理业务、公开募集证券投资基金管理业务、商品期货 经纪业务、金融期货经纪业务、期货投资咨询及投资与资产管理业务等。	sxzq@i618.com.cn		www.sxzq.com	CNE100000WJ0
103137	002500	山西证券	2016-12-31	山西证券股份有限公司	资本市场服务	J67	山西省太原市府西街69号山西国际贸易中心东塔楼	山西省太原市府西街69号山西国际贸易中心东塔楼	1988-07-28	2010-11-15	山西省	太原市	030002	王怡里	0351-8686668	0351-8686918	wangyili@mail.i618.com.cn	梁颖新	91140000110013881E	报告期内公司无收购及出售资产、吸收合并事项	112.55718037	37.8741842952	112.55759937	37.8742142952	侯巍	证券经纪、证券自营、资产管理、投资银行、财务顾问等证券相关业务。	2828725153	证券经纪业务、融资融券业务、证券自营业务、证券承销业务、证券投资咨询、与证券交易、证券投资活动有关的财务顾问、证券投资基金代销、为期货公司提供中间介绍业务、代销金融产品、受托资产管理业务、公开募集证券投资基金管理业务、商品期货经纪业务、金融期货经纪业务、期货投资咨询及投资与资产管理业务等。	sxzq@i618.com.cn		www.sxzq.com	CNE100000WJ0
103137	002500	山西证券	2017-12-31	山西证券股份有限公司	资本市场服务	J67	山西省太原市府西街69号山西国际贸易中心东塔楼	山西省太原市府西街69号山西国际贸易中心东塔楼	1988-07-28	2010-11-15	山西省	太原市	030002	王怡里	0351-8686668	0351-8686918	wangyili@mail.i618.com.cn	梁颖新	91140000110013881E	报告期内公司无收购及出售资产、吸收合并事项	112.55718037	37.8741842952	112.55759937	37.8742142952	侯巍	证券经纪、证券自营、资产管理、投资银行、财务顾问等证券相关业务。	2828725153	证券经纪业务、融资融券业务、证券自营业务、证券承销业务、证券投资咨询、与证券交易、证券投资活动有关的财务顾问、证券投资基金代销、为期货公司提供中间介绍业务、代销金融产品、受托资产管理业务、公开募集证券投资基金管理业务、商品期货经纪业务、金融期货经纪业务、期货投资咨询及投资与资产管理业务、大宗商品购买和转售、期货套利和套期保值服务等。	sxzq@i618.com.cn		www.sxzq.com	CNE100000WJ0
101998	002508	老板电器	2017-12-31	杭州老板电器股份有限公司	电气机械及器材制造业	C38	浙江省杭州市余杭经济开发区临平大道592号	浙江省杭州市余杭经济开发区临平大道592号	2000-11-07	2010-11-23	浙江省	杭州市	311100	王刚	0571-86187810	0571-86187769	wg@robam.com	沈萍萍	91330000725252053F	报告期内公司无收购及出售资产、吸收合并事项	120.2956289323	30.4459672066	120.2926013335	30.4449871119	任建华	厨房电器产品的研发、生产和销售。	949032825	厨房电器生产、销售业务。	wg@robam.com		www.robam.com	CNE100000WY9
101998	002508	老板电器	2018-12-31	杭州老板电器股份有限公司	电气机械及器材制造业	C38	浙江省杭州市余杭经济开发区临平大道592号	浙江省杭州市余杭经济开发区临平大道592号	2000-11-07	2010-11-23	浙江省	杭州市	311100	王刚	0571-86187810	0571-86187769	wg@robam.com	沈萍萍	91330000725252053F	报告期内公司无收购及出售资产、吸收合并事项	120.2926013335	30.4449871119	120.2926013335	30.4449871119	任建华	厨房电器产品的研发、生产和销售。	949024050	厨房电器生产、销售业务。	wg@robam.com		www.robam.com	CNE100000WY9
101960	002555	三七互娱	2017-12-31	芜湖顺荣三七互娱网络科技股份有限公司	互联网和相关服务	I64	安徽省芜湖市南陵县经济开发区	安徽省芜湖市鸠江区瑞祥路88号皖江财富广场A1座11楼	1995-05-26	2011-03-02	安徽省	芜湖市	241000	叶威	0553-7653737	0553-7653737	ir@37.com	陈振华	91340200713927789U	出售重大股权情况:交易对方:中南红文化集团股份有限公司;天津卡乐互动科技有限公司;华人文化有限责任公司;被出售股权:上海极光网络科技有限公司;上海喆元文化传媒有限公司;天津紫龙奇点互动娱乐有限公司;出售日:2017年03月31日;2017年01月13日;2017年08月21日;交易价格(万元):13,365;19,500;5,500;本期初起至出售日该股权为上市公司贡献的净利润(万元):29.3;0;0;出售对公司的影响:对公司业务不产生影响,增加本期净利润;对公司业务不产生影响,增加本期净利润;对公司业务不产生影响,增加本期净利润。;股权出售为上市公司贡献的净利润占净利润总额的比例:5.36%;4.49%;1.00%;股权出售定价原则:市场公允价值;市场公允价值;市场公允价值;是否为关联交易:否;否;否;与交易对方的关联关系:非关联方;非关联方;非关联方;所涉及的股权是否已全部过户:是…	118.433049009	31.3554681516	118.3164731508	30.899247228	李卫伟	先进的生产制造与现代文化创意并行的双主业。	2148110844	网络及计算机领域内的技术开发、技术转让、技术咨询、技术服务(涉及前置许可的除外),计算机系统集成,网络工程,图文设计制作,计算机、软件及辅助设备(除计算机信息系统安全专用产品)的销售,动漫的设计和制作,广告的设计、制作和发布,组织境内文化艺术交流活动,实业投资,汽车零部件制造、销售。(以上范围涉及前置许可的除外)。	dmb@shunrong.cn		www.37.com	CNE1000010N2
101960	002555	三七互娱	2018-12-31	芜湖顺荣三七互娱网络科技股份有限公司	互联网和相关服务	I64	安徽省芜湖市南陵县经济开发区	安徽省芜湖市鸠江区瑞祥路88号皖江财富广场A1座11楼	1995-05-26	2011-03-02	安徽省	芜湖市	241000	叶威	0553-7653737	0553-7653737	ir@37.com	王思捷	91340200713927789U	出售重大股权情况:交易对方:芜湖凝众汽车部件科技有限公司;被出售股权:顺荣有限公司;出售日:2018年11月30日;交易价格(万元):81900;本期初起至出售日该股权为上市公司贡献的净利润(万元):125.84;出售对公司的影响:通过剥离不适于上市公司长期战略、盈利能力较低的汽车部件板块资产,可使公司资源集中发展文化创意产业,提高资产运营效率,改善上市公司资产质量和盈利能力;股权出售为上市公司贡献的净利润占净利润总额的比例:-0.0094;股权出售定价原则:参考评估价值,协商确定;是否为关联交易:是;与交易对方的关联关系:控股股东控制的公司;所涉及的股权是否已全部过户:是;是否按计划如期实施,如未按计划实施,应当说明原因及公司已采取的措施:按计划实施;披露日期:2018年09月21日;披露索引:芜湖顺荣三七互娱网络科技股份有限公司关于出售汽车部件资产暨关联交易的公告(公告编号:2018…	118.433049009	31.3554681516	118.3164731508	30.899247228	李卫伟	以网络游戏为核心的文化创意产业。	2124870253	网络及计算机领域内的技术开发、技术转让、技术咨询、技术服务(涉及前置许可的除外),计算机系统集成,网络工程,图文设计制作,计算机、软件及辅助设备(除计算机信息系统安全专用产品)的销售,动漫的设计和制作,广告的设计、制作和发布,组织境内文化艺术交流活动,实业投资,汽车零部件制造、销售。(以上范围涉及前置许可的除外)	dmb@shunrong.cn		www.37.com	CNE1000010N2
102625	002558	巨人网络	2017-12-31	巨人网络集团股份有限公司	互联网和相关服务	I64	重庆市南岸区江南大道8号万达广场1栋5层	上海市松江区中辰路655号	1997-07-22	2011-03-02	重庆市	重庆市	201613	屈发兵	021-33979999	021-33979998	ir@ztgame.com		915000002031583935	报告期内公司无收购及出售资产、吸收合并事项	121.270175766	31.0541349586	106.5679693984	29.5259567172	刘伟	以网络游戏为主的综合性互联网业务。	1557484603	计算机游戏软件的开发、销售;网络游戏出版运营;利用互联网销售游戏产品;系统集成服务及数据处理;金融信息咨询;信息咨询等。	ir@ztgame.com		www.ga-me.com	CNE1000010R3
102625	002558	巨人网络	2018-12-31	巨人网络集团股份有限公司	互联网和相关服务	I64	重庆市南岸区江南大道8号万达广场1栋5层	上海市松江区中辰路655号	1997-07-22	2011-03-02	重庆市	重庆市	201613	屈发兵	021-33979999	021-33979998	ir@ztgame.com		915000002031583935	出售重大股权情况:交易对方:上海兰翔商务服务有限公司;被出售股权:上海巨加网络科技有限公司;出售日:2018年12月29日;交易价格(万元):47,940;本期初起至出售日该股权为上市公司贡献的净利润(万元):2,781.78;出售对公司的影响:对整体生产经营和业绩无重大影响;股权出售为上市公司贡献的净利润占净利润总额的比例:-0.60%;股权出售定价原则:基于净资产;是否为关联交易:否;与交易对方的关联关系:无;所涉及的股权是否已全部过户:是;是否按计划如期实施,如未按计划实施,应当说明原因及公司已采取的措施:是;披露日期:2018年12月29日;披露索引:http://www.cninfo.com.cn/	121.270175766	31.0541349586	106.5679693984	29.5259567172	刘伟	以网络游戏为主的综合性互联网业务。	1557484603	计算机游戏软件的开发、销售;网络游戏出版运营;利用互联网销售游戏产品;系统集成服务及数据处理;金融信息咨询及信息咨询等。	ir@ztgame.com		www.ga-me.com	CNE1000010R3
101965	002572	索菲亚	2017-12-31	索菲亚家居股份有限公司	家具制造业	C21	广东省广州市增城市新塘镇宁西工业园	广东省广州市增城市新塘镇宁西工业园	2003-07-15	2011-04-12	广东省	广州市	511358	潘雯姗	020-87533019	020-87579391	ningji@suofeiya.com.cn	陈曼齐	9144010174359126X2	报告期内公司无收购及出售资产、吸收合并事项	113.6719610848	23.2274560508	113.6719650848	23.2274540508	江淦钧	定制衣柜及其配套定制家具的研发、生产和销售。	923426310	木质家具制造;竹、藤家具制造;金属家具制造;塑料家具制造;其他家具制造;销售本公司生产的产品(国家法律法规禁止经营的项目除外);厨房设备及厨房用品批发;商品批发贸易(许可审批类商品除外);货物进出口(专营专控商品除外);技术进出口;百货零售;互联网商品销售(许可审批类商品除外;涉及许可经营的产品需取得许可证后方可经营);家具批发;家具设计服务;家具安装;室内装饰、装修;家具和相关物品修理;家具零售;家居饰品批发;软件开发;软件批发;信息系统集成服务;计算机房维护服务;信息技术咨询服务;数据处理和存储服务。主要产品为定制家具制品及相关配件产品。	ningji@suofeiya.com.cn		www.sfygroup.com	CNE100001203
103723	002594	比亚迪	2015-12-31	比亚迪股份有限公司	汽车制造业	C36	广东省深圳市龙岗区葵涌镇延安路	广东省深圳市坪山新区比亚迪路3009号	2002-06-11	2002-07-31	广东省	深圳市	518118	李黔	0755-89888888	0755-84202222	db@byd.com	程燕;张燕		出售重大股权情况: 交易对方：合力泰科技股份有限公司 被出售股权：深圳市比亚迪电子部品件有限公司100%股权 出售日：2015年09月30日 交易价格（万元）：230,000 本期初起至出售日该股权为上市公司贡献的净利润（万元）：10,765 出售对公司的影响：本次出售将强化集团的战略聚焦，加快集团的业务转型升级，优化集团的资产结构和资源配臵，推动集团集中资源发展核心业务，有利于促进集团新能源汽车业务的长远发展。同时，出售股权带来的现金流入将有助于改善集团债务结构，缓解集团资金压力，对减少财务费用也有积极影响。 股权出售为上市公司贡献的净利润占净利润总额的比例：50.94% 股权出售定价原则:根据具有证券业务资格的资产评估机构出具的资产评估报告中的深圳市比亚迪电子部品件有限公司全部股权之评估值作参考，双方协商确认。 是否为关联交易：否 与交易对方的关联关系：非关联 所涉及的股权是否已全部…	114.3588098558	22.6794454302	114.4330515113	22.6326010951	王传福	二次充电电池业务、手机部件及组装业务，以及包含传统燃油汽车及新能源汽车在内的汽车业务	2476000000	锂离子电池以及其他电池、充电器、电子产品、仪器仪表、柔性线路板、五金制 品、手机零配件、模具、塑胶制品及其相关附件的生产、销售；货物及技术进出口（不含进口分销）；道路普 通货运；3D眼镜、GPS 导航产品的研发、生产及销售；作为比亚迪汽车有限公司比亚迪品牌乘用车、电动车的 总经销商，从事上述品牌的乘用车、电动车及其零部件的营销、批发和出口，提供售后服务；电池管理系统、 换流柜、逆变柜/器、汇流箱、开关柜、储能机组的销售。	db@byd.com	01211	www.byd.com.cn	CNE100001526
103723	002594	比亚迪	2016-12-31	比亚迪股份有限公司	汽车制造业	C36	广东省深圳市大鹏新区葵涌街道延安路一号	广东省深圳市坪山区比亚迪路3009号	2002-06-11	2002-07-31	广东省	深圳市	518118	李黔	0755-89888888-62126	0755-84202222	db@byd.com	程燕;王海进	91440300192317458F	报告期内公司无收购及出售资产、吸收合并事项	114.4333515113	22.6328620951	114.4335515113	22.6328520951	王传福	二次充电电池业务、手机部件及组装业务，以及包含传统燃油汽车及新能源汽车在内的汽车业务	2728143000	锂离子电池以及其他电池、充电器、电子产品、仪器仪表、柔性线路板、五金制品、手机零配件、模具、塑胶制品及其相关附件的生产、销售;货物及技术进出口(不含进口分销);道路普通货运;3D眼镜、GPS导航产品的研发、生产及销售;作为比亚迪汽车有限公司比亚迪品牌乘用车、电动车的总经销商,从事上述品牌的乘用车、电动车及其零部件的营销、批发和出口,提供售后服务;电池管理系统、换流柜、逆变柜/器、汇流箱、开关柜、储能机组的销售。	db@byd.com	01211	www.byd.com.cn	CNE100001526
103723	002594	比亚迪	2017-12-31	比亚迪股份有限公司	汽车制造业	C36	广东省深圳市大鹏新区葵涌街道延安路一号	广东省深圳市坪山区比亚迪路3009号	2002-06-11	2002-07-31	广东省	深圳市	518118	李黔	0755-89888888-62126	0755-84202222	db@byd.com	程燕;王海进	91440300192317458F	报告期内公司无收购及出售资产、吸收合并事项	114.4333515113	22.6328620951	114.4335515113	22.6328520951	王传福	二次充电电池业务、手机部件及组装业务，以及包含传统燃油汽车及新能源汽车在内的汽车业务	2728143000	锂离子电池以及其他电池、充电器、电子产品、仪器仪表、柔性线路板、五金制品、手机零配件、模具、塑胶制品及其相关附件的生产、销售;货物及技术进出口(不含进口分销);道路普通货运;3D眼镜、GPS导航产品的研发、生产及销售;作为比亚迪汽车有限公司比亚迪品牌乘用车、电动车的总经销商,从事上述品牌的乘用车、电动车及其零部件的营销、批发和出口,提供售后服务;电池管理系统、换流柜、逆变柜/器、汇流箱、开关柜、储能机组的销售;汽车电子装置研发、销售;新能源汽车关键零部件研发以及上述零部件的关键零件、部件的研发、销售;轨道交通运输设备(含轨道交通车辆、工程机械、各类机电设备、电子设备及零部件、电子电气件、轨道交通信号系统、通信及综合监控系统与设备)的研发、设计、销售、租赁与售后服务(不涉及国营贸易管理商品,涉及配额、许可证管理及其他专项管理的商品,按国家有关规定办理申请);轨道梁柱的研发、设计、销售;自有…	db@byd.com	01211	www.byd.com.cn	CNE100001526
103723	002594	比亚迪	2018-12-31	比亚迪股份有限公司	汽车制造业	C36	广东省深圳市大鹏新区葵涌街道延安路一号	广东省深圳市坪山区比亚迪路3009号	2002-06-11	2002-07-31	广东省	深圳市	518118	李黔	0755-89888888-62126	0755-84202222	db@byd.com	程燕;王海进	91440300192317458F	报告期内公司无收购及出售资产、吸收合并事项	114.3603138558	22.6781094302	114.4335515113	22.6328520951	王传福	二次充电电池业务、手机部件及组装业务，以及包含传统燃油汽车及新能源汽车在内的汽车业务	2728143000	锂离子电池以及其他电池、充电器、电子产品、仪器仪表、柔性线路板、五金制品、手机零配件、模具、塑胶制品及其相关附件的生产、销售;货物及技术进出口(不含进口分销);道路普通货运;3D眼镜、GPS导航产品的研发、生产及销售;作为比亚迪汽车有限公司比亚迪品牌乘用车、电动车的总经销商,从事上述品牌的乘用车、电动车及其零部件的营销、批发和出口,提供售后服务;电池管理系统、换流柜、逆变柜/器、汇流箱、开关柜、储能机组的销售;汽车电子装置研发、销售;新能源汽车关键零部件研发以及上述零部件的关键零件、部件的研发、销售;轨道交通运输设备(含轨道交通车辆、工程机械、各类机电设备、电子设备及零部件、电子电气件、轨道交通信号系统、通信及综合监控系统与设备)的研发、设计、销售、租赁与售后服务(不涉及国营贸易管理商品,涉及配额、许可证管理及其他专项管理的商品,按国家有关规定办理申请);轨道梁柱的研发、设计、销售;自有…	db@byd.com	01211	www.byd.com	CNE100001526
102348	002601	龙蟒佰利	2017-12-31	龙蟒佰利联集团股份有限公司	化学原料及化学制品制造业	C26	河南省焦作市中站区冯封办事处	河南省焦作市中站区冯封办事处	1998-08-20	2011-07-15	河南省	焦作市	454191	张海涛	0391-3126666	0391-3126111	zht@lomonbillions.com	郝军杰	91410800173472241R	报告期内公司无收购及出售资产、吸收合并事项	113.1721185291	35.2551356691	113.1829538414	35.2368356347	许刚	钛白粉、锆制品和硫酸铝等产品的生产与销售。	2032095439	经营本企业自产产品及相关技术的进出口业务;但国家限定公司经营或禁止进出口的商品及技术除外,化工产品(不含化学危险品及易燃易爆品)的生产、销售;铁肥销售;硫酸60万吨/年的生产(生产场所:中站区佰利联园区内)、销售(仅限在本厂区范围内销售本企业生产的硫酸);氧化钪生产;设备、房产、土地的租赁。(依法须经批准的项目,经相关部门批准后方可开展经营活动)。	bll002601@163.com		www.lomonbillions.com	CNE1000015M3
102348	002601	龙蟒佰利	2018-12-31	龙蟒佰利联集团股份有限公司	化学原料及化学制品制造业	C26	河南省焦作市中站区冯封办事处	河南省焦作市中站区冯封办事处	1998-08-20	2011-07-15	河南省	焦作市	454191	张海涛	0391-3126666	0391-3126111	zht@lomonbillions.com		91410800173472241R	报告期内公司无收购及出售资产、吸收合并事项	113.1829538414	35.2368356347	113.1829538414	35.2368356347	许刚	钛白粉、锆制品和硫酸铝等产品的生产与销售。	2032020889	经营本企业自产产品及相关技术的进出口业务;但国家限定公司经营或禁止进出口的商品及技术除外,化工产品(不含化学危险品及易燃易爆品)的生产、销售;铁肥销售;硫酸60万吨/年的生产(生产场所:中站区佰利联园区内)、销售(仅限在本厂区范围内销售本企业生产的硫酸);氧化钪生产;设备、房产、土地的租赁。(依法须经批准的项目,经相关部门批准后方可开展经营活动)。	bll002601@163.com		www.lomonbillions.com	CNE1000015M3
102349	002602	世纪华通	2017-12-31	浙江世纪华通集团股份有限公司	汽车制造业	C36	浙江省绍兴市上虞区曹娥街道人民西路439号	浙江省绍兴市上虞区曹娥街道越爱路66号	2005-10-31	2011-07-28	浙江省	绍兴市	312300	严正山	0575-82148872	0575-82208079	zhengshan_yan@sjhuatong.com		91330000780477634Q	出售重大股权情况:交易对方:宁波镜瑄投资管理合伙企业(有限合伙);海南九游信息技术有限公司;被出售股权:杭州盛锋网络科技有限公司;重庆任天游科技有限公司;出售日:2017年06月05日;2017年06月01日;交易价格(万元):50,000;0.44;本期初起至出售日该股权为上市公司贡献的净利润(万元):1,453.67;-5.29;出售对公司的影响:无;减少亏损;股权出售为上市公司贡献的净利润占净利润总额的比例:48.91%;0.00%;股权出售定价原则:公允价值;资产净值;是否为关联交易:否;否;与交易对方的关联关系:无;无;所涉及的股权是否已全部过户:是;是;是否按计划如期实施,如未按计划实施,应当说明原因及公司已采取的措施:是;是;披露日期:2017年03月08日;-;披露索引:巨潮资讯网2017-017号公告;-	120.8512491642	30.0130609705	120.8521121642	30.0143349705	王苗通	各种汽车用塑料零部件及相关模具的研发、制造和销售。	1027092040	汽车配件、摩托车配件、精密金属模具制造、加工、销售;金属冲压件、注塑件设计、生产、销售;塑料粒子、塑料制品、金属制品的批发;计算机软硬件的技术开发、技术咨询、技术服务及销售;纺织品、服装、橡胶制品、金属制品、通信设备、计算机及电子设备、机电设备的批发、佣金代理(拍卖除外)及其进出口业务。上述涉及许可证管理的凭证经营。(依法须经批准的项目,经相关部门批准后方可开展经营活动)。主要产品或提供的劳务:汽车零配件及其他配件、游戏开发及运营。	sjhuatong@sjhuatong.com		www.sjhuatong.com	CNE1000015R2
102349	002602	世纪华通	2018-12-31	浙江世纪华通集团股份有限公司	汽车制造业	C36	浙江省绍兴市上虞区曹娥街道越爱路66号5幢	浙江省绍兴市上虞区曹娥街道越爱路66号	2005-10-31	2011-07-28	浙江省	绍兴市	312300	严正山	0575-82148872	0575-82208079	zhengshan_yan@sjhuatong.com		91330000780477634Q	出售重大股权情况:交易对方:江苏三九互娱网络科技有限公司;深圳市胜利互娱网络科技有限公司;被出售股权:上海捷玩45%股权;北京文脉51%股权;出售日:2018年01月31日;2018年03月19日;交易价格(万元):2,475;30,000;本期初起至出售日该股权为上市公司贡献的净利润(万元):0;468.8;出售对公司的影响:丧失子公司;丧失子公司;股权出售定价原则:公允价值;公允价值;是否为关联交易:否;否;与交易对方的关联关系:不适用;不适用;所涉及的股权是否已全部过户:是;是;是否按计划如期实施,如未按计划实施,应当说明原因及公司已采取的措施:是;是	120.8234724072	30.0241436893	120.8234724072	30.0241436893	王苗通	各种汽车用塑料零部件及相关模具的研发、制造和销售。	2334756244	汽车配件、摩托车配件、精密金属模具制造、加工、销售;金属冲压件、注塑件设计、生产、销售;塑料粒子、塑料制品、金属制品的批发;计算机软硬件的技术开发、技术咨询、技术服务及销售、利用信息网络经营游戏产品(含网络游戏虚拟货币发行)、互联网游戏出版;纺织品、服装、橡胶制品、金属制品、通信设备、计算机及电子设备、机电设备的批发、佣金代理(拍卖除外)及其进出口业务。上述涉及许可证管理的凭证经营。	sjhuatong@sjhuatong.com		www.sjhuatong.com	CNE1000015R2
101994	002608	江苏国信	2017-12-31	江苏国信股份有限公司	电力、热力生产和供应业	D44	江苏省南京市玄武区长江路88号	江苏省南京市玄武区长江路88号	2003-06-16	2011-08-10	江苏省	南京市	210005	章明	025-84679116	025-84679188	info2@jsgxgf.com	章明(代)	91320000751254554N	报告期内公司无收购及出售资产、吸收合并事项	118.7866905699	32.0453879331	118.7867415699	32.0460069331	浦宝英	远洋支线机动船舶建造业务和非机动船舶建造业务。	3253145323	实业投资、股权投资(包括金融、电力能源股权等)、投资管理与咨询电力项目开发建设和运营管理电力技术咨询、节能产品销售进出口贸易。(依法须经批准的项目经相关部门批准后方可开展经营活动)	info@saintymarine.com.cn		www.jsgx.net/jsgxgf/index.aspx	CNE100001658
107665	002624	完美世界	2017-12-31	完美世界股份有限公司	互联网和相关服务	I64	浙江省湖州市德清县钟管镇龙山路117号	北京市朝阳区北苑路86号完美世界大厦	1999-08-27	2011-10-28	浙江省	湖州市	100101	王巍巍	010-57806688	010-57805227	zhengquanbu@pwrd.com	随志杰	913300007044605152	出售重大股权情况:交易对方:黄勇伟;深圳市惠程电气股份有限公司;被出售股权:中国富创传媒集团18.8%的股权;成都哆可梦网络科技有限公司8.44%的股权;出售日:2017年01月10日;2017年03月14日;交易价格(万元):48,011.6;6,755.52;本期初起至出售日该股权为上市公司贡献的净利润(万元):0;186.14;出售对公司的影响:对公司业务连续性、管理层稳定性不产生影响;同时本报告期确认投资收益2,222.81万元;对公司业务连续性、管理层稳定性不产生影响;同时本报告期确认投资收益5,471.66万元;股权出售为上市公司贡献的净利润占净利润总额的比例:1.48%;3.64%;股权出售定价原则:协商确定;协商确定;是否为关联交易:否;否;与交易对方的关联关系:否;否;所涉及的股权是否已全部过户:是;是;是否按计划如期实施,如未按计划实施,应当说明原因及公司已采取的措施…	116.4232472814	40.0033493344	120.1681866814	30.6296942904	池宇峰	网络游戏的研发、发行和运营;电视剧、电影的制作、发行及衍生业务;艺人经纪服务及相关服务业务。	1314609851	广播电视节目制作经营(范围详见《广播电视节目制作经营许可证》)。动漫、平面设计、制作,网站开发,网页设计,设计、制作、代理、发布国内各类广告,软件开发、销售,文化艺术活动、体育赛事、企业营销的策划,休闲观光旅游项目开发,会展服务,企业管理咨询,教育咨询,投资管理,投资咨询,资产管理,服装、玩具、鞋帽、箱包、眼镜、首饰、文化用品、电子产品、日用百货、针纺织品、工艺品、通讯设备、花草、观赏性植物、计算机及辅助设备的销售,从事进出口业务。	zhengquanbu@pwrd.com		www.pwrd.com	CNE1000018W6
107665	002624	完美世界	2018-12-31	完美世界股份有限公司	互联网和相关服务	I64	浙江省湖州市德清县钟管镇龙山路117号	北京市朝阳区北苑路86号完美世界大厦	1999-08-27	2011-10-28	浙江省	湖州市	100101	王巍巍	010-57806688	010-57805227	zhengquanbu@pwrd.com	随志杰	913300007044605152	出售重大股权情况:交易对方:完美世界控股集团有限公司;北京祖龙游科技有限公司;被出售股权:完美世界院线有限公司、北京时代今典影视文化有限公司、北京完美世界电影放映有限公司、温岭市新时代乐购影城有限责任公司;祖龙(天津)科技有限公司4.49%的股权;出售日:2018年07月31日;2018年07月31日;交易价格(万元):166,491.27(含债权);15,715;本期初起至出售日该股权为上市公司贡献的净利润(万:3,481.18;488.31;出售对公司的影响:对公司业务连续性、管理层稳定性不产生影响;对公司业务连续性、管理层稳定性不产生影响;同时本报告期确认税前投资收益14,679.37万元;股权出售为上市公司贡献的净利润占净利润总额的比例:0;6.45%;股权出售定价原则:按照评估基准日评估值与含商誉的净资产账面价值孰高的原则确定股权转让对价;按照债权于基准日经审计的账面价值并考虑…	116.4232472814	40.0033493344	120.1681866814	30.6296942904	池宇峰	网络游戏的研发、发行和运营;电视剧、电影的制作、发行及衍生业务;艺人经纪服务及相关服务业务。	1314609851	广播电视节目制作经营(范围详见《广播电视节目制作经营许可证》)。动漫、平面设计、制作,网站开发,网页设计,设计、制作、代理、发布国内各类广告,软件开发、销售,文化艺术活动、体育赛事、企业营销的策划,休闲观光旅游项目开发,会展服务,企业管理咨询,教育咨询,投资管理,投资咨询,资产管理,服装、玩具、鞋帽、箱包、眼镜、首饰、文化用品、电子产品、日用百货、针纺织品、工艺品、通讯设备、花草、观赏性植物、计算机及辅助设备的销售,从事进出口业务。	zhengquanbu@pwrd.com		www.pwrd.com	CNE1000018W6
107867	002625	光启技术	2018-12-31	光启技术股份有限公司	汽车制造业	C36	浙江省杭州市桐庐县富春江镇机械工业区	广东省深圳市南山区高新中一道9号软件大厦三层；浙江省桐庐县富春江镇机械工业区	2001-07-18	2011-11-03	浙江省	杭州市	518057,311504	姚婧	0755-86581658	0755-86329077	ir@kc-t.cn	刘天子	91330000730337692W	报告期内公司无收购及出售资产、吸收合并事项	113.9398185572	22.5491446545	119.65011874	29.7088370357	刘若鹏	汽车座椅功能件及其他金属零部件的研发、生产和销售。	2154587862	超材料智能结构及装备的研发、生产、销售,汽车内饰件、汽车零件的生产、销售,商用车、普通机械、仪器仪表的销售,经营进出口业务。(依法须经批准的项目,经相关部门批准后方可开展经营活动)。产品及提供的劳务主要有:汽车座椅滑轨、调角器和升降器等汽车零部件产品以及研制服务。	ir@kc-t.cn		www.kc-t.cn	CNE1000018P0
107618	002673	西部证券	2015-12-31	西部证券股份有限公司	资本市场服务	J67	陕西省西安市东新街232号信托大厦	陕西省西安市东新街232号信托大厦	2001-01-09	2012-05-03	陕西省	西安市	710004	黄斌	029-87406171	029-87406259	huangh@xbmail.com.cn	黄斌	91610000719782242D	报告期内公司无收购及出售资产、吸收合并事项	108.9600196802	34.2641273996	108.9599306802	34.2638733996	刘建武	经纪业务、投资银行业务、客户资产管理业务、自营业务、研究咨询业务、证券投资基金代销业务、为期货公司提供中间介绍业务(IB 业务)。	2795569620	证券经纪;证券投资咨询;与证券交易、 证券投资活动有关的财务顾问;证券承销与保荐;证券自营;证券资产管理;融资融券; 证券投资基金代销;为期货公司提供中间介绍业务;代销金融产品业务(经营证券业务许 可证有效期至208年8月4日);股票期权做市。	huangb@xbmail.com.cn		www.westsecu.com	CNE100001D96
107618	002673	西部证券	2016-12-31	西部证券股份有限公司	资本市场服务	J67	陕西省西安市新城区东新街232号信托大厦16-17层	陕西省西安市新城区东新街232号信托大厦16-17层	2001-01-09	2012-05-03	陕西省	西安市	710004	黄斌	029-87406171	029-87406259	huangb@xbmail.com.cn	杨金铎	91610000719782242D	报告期内公司无收购及出售资产、吸收合并事项	108.9600196802	34.2641273996	108.9599306802	34.2638733996	刘建武	经纪业务、投资银行业务、客户资产管理业务、自营业务、研究咨询业务、证券投资基金代销业务、为期货公司提供中间介绍业务(IB 业务)。	2795569600	证券经纪;证券投资咨询;与证券交易、证券投资活动有关的财务顾问;证券承销与保荐;证券自营;证券资产管理;融资融券;证券投资基金代销;为期货公司提供中间介绍业务;代销金融产品业务;股票期权做市。	huangb@xbmail.com.cn		www.westsecu.com	CNE100001D96
107618	002673	西部证券	2017-12-31	西部证券股份有限公司	资本市场服务	J67	陕西省西安市新城区东新街319号8幢10000室	陕西省西安市新城区东新街319号8幢10000室	2001-01-09	2012-05-03	陕西省	西安市	710004	黄斌	029-87406171	029-87406259	huangb@xbmail.com.cn	杨金铎	91610000719782242D	报告期内公司无收购及出售资产、吸收合并事项	108.9588696802	34.2646473996	108.9593006802	34.2640953996	刘建武	经纪业务、投资银行业务、客户资产管理业务、自营业务、研究咨询业务、证券投资基金代销业务、为期货公司提供中间介绍业务(IB 业务)。	3501839770	证券经纪;证券投资咨询;与证券交易、证券投资活动有关的财务顾问;证券承销与保荐;证券自营;证券资产管理;融资融券;证券投资基金代销;为期货公司提供中间介绍业务;代销金融产品业务;股票期权做市。	huangb@xbmail.com.cn		www.westsecu.com	CNE100001D96
107618	002673	西部证券	2018-12-31	西部证券股份有限公司	资本市场服务	J67	陕西省西安市新城区东新街319号8幢10000室	陕西省西安市新城区东新街319号8幢10000室	2001-01-09	2012-05-03	陕西省	西安市	710004	黄斌	029-87406171	029-87406259	huangb@xbmail.com.cn	杨金铎	91610000719782242D	报告期内公司无收购及出售资产、吸收合并事项	108.9588696802	34.2646473996	108.9593006802	34.2640953996	徐朝晖	经纪业务、投资银行业务、客户资产管理业务、自营业务、研究咨询业务、证券投资基金代销业务、为期货公司提供中间介绍业务(IB 业务)。	3501839770	证券经纪;证券投资咨询;与证券交易、证券投资活动有关的财务顾问;证券承销与保荐;证券自营;证券资产管理;融资融券;证券投资基金代销;为期货公司提供中间介绍业务;代销金融产品业务;股票期权做市	huangb@xbmail.com.cn		www.westsecu.com	CNE100001D96
10106922	002714	牧原股份	2016-12-31	牧原食品股份有限公司	畜牧业	A03	河南省南阳市内乡县灌涨镇水田村	河南省南阳市卧龙区龙升工业园区	2000-07-13	2014-01-28	河南省	南阳市	473000	秦军	0377-65239559	0377-66100053	myzqb@muyuanfoods.com	曹芳	91410000706676846C	报告期内公司无收购及出售资产、吸收合并事项	112.4532040098	33.0203390767	111.9794488166	33.0549596794	秦英林	生猪的养殖与销售,主要产品为仔猪、种猪、商品猪。	1033746218	畜禽养殖,购销,良种繁育,饲料加工销售,畜产品加工销售,畜牧机械加工销售,猪粪处理;经营本企业自产产品及相关技术的进出口业务,但国家限定公司经营或禁止进出口的商品及技术除外。主要产品为:种猪及商品猪。	myzqb@muyuanfoods.com		www.muyuanfoods.com	CNE100001RQ3
10106922	002714	牧原股份	2017-12-31	牧原食品股份有限公司	畜牧业	A03	河南省南阳市内乡县灌涨镇水田村	河南省南阳市卧龙区龙升工业园区	2000-07-13	2014-01-28	河南省	南阳市	473000	秦军	0377-65239559	0377-66100053	myzqb@muyuanfoods.com	曹芳	91410000706676846C	报告期内公司无收购及出售资产、吸收合并事项	112.4532040098	33.0203390767	111.9794488166	33.0549596794	秦英林	生猪的养殖与销售,主要产品为仔猪、种猪、商品猪。	1158463457	畜禽养殖,购销,良种繁育,饲料加工销售,畜产品加工销售,畜牧机械加工销售,猪粪处理;经营本企业自产产品及相关技术的进出口业务,但国家限定公司经营或禁止进出口的商品及技术除外。主要产品为:商品猪、仔猪及种猪。	myzqb@muyuanfoods.com		www.muyuanfoods.com	CNE100001RQ3
10106922	002714	牧原股份	2018-12-31	牧原食品股份有限公司	畜牧业	A03	河南省南阳市内乡县灌涨镇水田村	河南省南阳市卧龙区龙升工业园区	2000-07-13	2014-01-28	河南省	南阳市	473000	秦军	0377-65239559	0377-66100053	myzqb@muyuanfoods.com	曹芳	91410000706676846C	报告期内公司无收购及出售资产、吸收合并事项	112.4532040098	33.0203390767	111.9794488166	33.0549596794	秦英林	生猪的养殖与销售,主要产品为仔猪、种猪、商品猪。	2085234222	畜禽养殖,购销,良种繁育,饲料加工销售,畜产品加工销售,畜牧机械加工销售,猪粪处理;经营本企业自产产品及相关技术的进出口业务,但国家限定公司经营或禁止进出口的商品及技术除外。	myzqb@muyuanfoods.com		www.muyuanfoods.com	CNE100001RQ3
106031	002736	国信证券	2015-12-31	国信证券股份有限公司	资本市场服务	J67	广东省深圳市罗湖区红岭中路1012号国信证券大厦十六层至二十六层	广东省深圳市罗湖区红岭中路1012号国信证券大厦十六层至二十六层	1994-06-30	2014-12-29	广东省	深圳市	518001	胡华勇	0755-82130188	0755-82133453	ir@guosen.com.cn	张剑军		报告期内公司无收购及出售资产、吸收合并事项	114.1049153336	22.545997947	114.10514057	22.54607189	何如	公司主要从事证券经纪、投资银行、证券自营、资产管理以及资本中介等业务,通过全资子公司从事直接投资业务、期货业务、境外业务等。	8200000000	证券经纪;证券投资咨询;与证券交易,证券投资活动有关的财务 顾问;证券承销与保荐;证券自营;证券资产管理;融资融券;证券投资基金代销;金融产品代销;为期货公司提供中间介绍业务;证券投资基金托管业务;股票期权做市; 商品期货经纪、金融期货经纪、期货投资咨询、资产管理;受托管理股权投资基金、创 业投资业务、代理其他创业投资企业等机构或个人的创业投资业务、创业投资咨询业务、 为创业企业提供创业管理服务业务、参与设立创业投资企业与创业投资管理顾问机构; 香港证券经纪业务、融资业务及资产管理业务等。	xzyxzb@guosen.com.cn		www.guosen.com.cn	CNE100001WS9
106031	002736	国信证券	2016-12-31	国信证券股份有限公司	资本市场服务	J67	广东省深圳市红岭中路1012号国信证券大厦十六层至二十六层	广东省深圳市红岭中路1012号国信证券大厦	1994-06-30	2014-12-29	广东省	深圳市	518001	胡华勇	0755-82130188	0755-82133453	ir@guosen.com.cn	张剑军	914403001922784445	报告期内公司无收购及出售资产、吸收合并事项	114.1049153336	22.545997947	114.10514057	22.54607189	何如	公司主要从事证券经纪、投资银行、证券自营、资产管理以及资本中介等业务,通过全资子公司从事直接投资业务、期货业务、境外业务等。	8200000000	证券经纪及财富管理、投资银行、投资与交易、资产管理以及资本中介等业务,通过全资子公司国信弘盛从事直接投资业务、通过全资子公司国信期货从事期货业务、通过全资子公司国信香港从事境外业务等	xzyxzb@guosen.com.cn		www.guosen.com.cn	CNE100001WS9
106031	002736	国信证券	2017-12-31	国信证券股份有限公司	资本市场服务	J67	广东省深圳市红岭中路1012号国信证券大厦十六层至二十六层	广东省深圳市红岭中路1012号国信证券大厦	1994-06-30	2014-12-29	广东省	深圳市	518001	胡华勇	0755-82130188	0755-82133453	ir@guosen.com.cn	张剑军	914403001922784445	报告期内公司无收购及出售资产、吸收合并事项	114.1049153336	22.545997947	114.10514057	22.54607189	何如	公司主要从事证券经纪、投资银行、证券自营、资产管理以及资本中介等业务,通过全资子公司从事直接投资业务、期货业务、境外业务等。	8200000000	向个人、机构客户提供全方位的金融产品和服务,并自营相关金融产品的投资与交易业务	xzyxzb@guosen.com.cn		www.guosen.com.cn	CNE100001WS9
106031	002736	国信证券	2018-12-31	国信证券股份有限公司	资本市场服务	J67	广东省深圳市红岭中路1012号国信证券大厦十六层至二十六层	广东省深圳市红岭中路1012号国信证券大厦	1994-06-30	2014-12-29	广东省	深圳市	518001	谌传立	0755-82130188	0755-82133453	ir@guosen.com.cn	蔡妮芩	914403001922784445	报告期内公司无收购及出售资产、吸收合并事项	114.10514057	22.54607189	114.10514057	22.54607189	岳克胜	公司主要从事证券经纪、投资银行、证券自营、资产管理以及资本中介等业务,通过全资子公司从事直接投资业务、期货业务、境外业务等。	8200000000	证券经纪;证券投资咨询;与证券交易,证券投资活动有关的财务顾问;证券承销与保荐;证券自营;证券资产管理;融资融券;证券投资基金代销;金融产品代销;为期货公司提供中间介绍业务;证券投资基金托管业务;股票期权做市;商品期货经纪、金融期货经纪、期货投资咨询、资产管理;受托管理股权投资基金、创业投资业务、代理其他创业投资企业等机构或个人的创业投资业务、创业投资咨询业务、为创业企业提供创业管理服务业务、参与设立创业投资企业与创业投资管理顾问机构;香港证券经纪业务、融资业务及资产管理业务等。	xzyxzb@guosen.com.cn		www.guosen.com.cn	CNE100001WS9
10132698	002739	万达电影	2015-12-31	万达电影院线股份有限公司	广播、电视、电影和影视录音制作业	R86	北京市朝阳区建国路93号万达广场B座11层	北京市朝阳区建国路93号万达广场B座11层	2005-01-20	2015-01-22	北京市	北京市	100022	王会武	010-85587602	010-85587500	wandafilm-ir@wanda.com.cn	彭涛	911100007715928418	报告期内公司无收购及出售资产、吸收合并事项	116.4724205963	39.9091368144	116.4714895963	39.9101868144	张霖	影院投资建设,院线电影发行、影院电影放映及相关衍生业务(卖品销售、广告发布等)	1174294974	许可经营项目：包括影片发行和放映；一般经营项目：包括电影院投资；出租商业设施；广告发布；票务 代理；图文设计、制作。	wandafilm-ir@wanda.com.cn		www.wandacinemas.com	CNE100001WW1
10132698	002739	万达电影	2016-12-31	万达电影院线股份有限公司	广播、电视、电影和影视录音制作业	R86	北京市朝阳区建国路93号万达广场B座11层	北京市朝阳区建国路93号万达广场B座11层	2005-01-20	2015-01-22	北京市	北京市	100022	王会武	010-85587602	010-85587500	wandafilm-ir@wanda.com.cn	彭涛	911100007715928418	报告期内公司无收购及出售资产、吸收合并事项	116.4724205963	39.9091368144	116.4714895963	39.9101868144	张霖	影院投资建设,院线电影发行、影院电影放映及相关衍生业务(卖品销售、广告发布等)	1174294974	许可经营项目:包括影片发行和放映;一般经营项目:包括电影院投资;出租商业设施;广告发布;票务代理;图文设计、制作。	wandafilm-ir@wanda.com.cn		www.wandacinemas.com	CNE100001WW1
10132698	002739	万达电影	2017-12-31	万达电影股份有限公司	广播、电视、电影和影视录音制作业	R86	北京市朝阳区建国路93号万达广场B座11层	北京市朝阳区建国路93号万达广场B座11层	2005-01-20	2015-01-22	北京市	北京市	100022	王会武	010-85587602	010-85587500	wandafilm-ir@wanda.com.cn	彭涛	911100007715928418	报告期内公司无收购及出售资产、吸收合并事项	116.4724205963	39.9091368144	116.4714895963	39.9101868144	张霖	影院投资建设,院线电影发行、影院电影放映及相关衍生业务(卖品销售、广告发布等)	1174294974	许可经营项目:包括影片发行和放映;一般经营项目:包括电影院投资;出租商业设施;广告发布;票务代理;图文设计、制作。	wandafilm-ir@wanda.com.cn		www.wandafilm.com	CNE100001WW1
10132698	002739	万达电影	2018-12-31	万达电影股份有限公司	广播、电视、电影和影视录音制作业	R86	北京市朝阳区建国路93号万达广场B座11层	北京市朝阳区建国路93号万达广场B座11层	2005-01-20	2015-01-22	北京市	北京市	100022	王会武	010-85587602	010-85587500	wandafilm-ir@wanda.com.cn	彭涛	911100007715928418	报告期内公司无收购及出售资产、吸收合并事项	116.4724205963	39.9091368144	116.4714895963	39.9101868144	张霖	影院投资建设,院线电影发行、影院电影放映及相关衍生业务(卖品销售、广告发布等)	1761442461	电影摄制;电视剧制作;广播电视节目制作;影片发行和放映;代理记账;会计咨询;电影院投资;出租商业设施;广告发布;票务代理;图文设计、制作;税务咨询;企业管理咨询;经济信息咨询;计算机技术服务与技术咨询;计算机系统集成;网络设备安装与维护。(企业依法自主选择经营项目,开展经营活动;依法须经批准的项目,经相关部门批准后依批准的内容开展经营活动;不得从事本市产业政策禁止和限制类项目的经营活动。)	wandafilm-ir@wanda.com.cn		www.wandafilm.com	CNE100001WW1
10113816	002773	康弘药业	2018-12-31	成都康弘药业集团股份有限公司	医药制造业	C27	四川省成都市金牛区蜀西路36号	四川省成都市金牛区蜀西路36号	1996-10-03	2015-06-26	四川省	成都市	610036	钟建军	028-87502055	028-87513956	khdm@cnkh.com	邓康	91510100633116839D	报告期内公司无收购及出售资产、吸收合并事项	103.9971645898	30.7102227767	103.9970305898	30.7103617767	柯尊洪	中成药、化学药及生物制品的研发、生产和销售	673536680	中成药、化学药、生物制品、医疗器械的生产销售	khdm@cnkh.com		www.cnkh.com	CNE1000020C4
106072	002797	第一创业	2016-12-31	第一创业证券股份有限公司	资本市场服务	J67	广东省深圳市福田区福华一路115号投行大厦20楼	广东省深圳市福田区福华一路115号投行大厦16-20楼	1998-01-12	2016-05-11	广东省	深圳市	518048	萧进华	0755-23838868	0755-23838877	IR@fcsc.com	王硕	91440300707743879G	报告期内公司无收购及出售资产、吸收合并事项	114.0518209095	22.5364530523	114.0518119095	22.5364230523	刘学民	从事证券经纪、财务顾问、证券(不含股票、中小企业私募债券以外的公司债券)承销、证券自营、证券资产管理以及资本中介等业务,并通过全资子公司从事直投、期货经纪、金融产品投资和其他另类投资等业务,通过控股子公司从事投资银行和基金管理业务。	2189000000	证券经纪;证券投资咨询;与证券交易、证券投资活动有关的财务顾问;证券(不含股票、中小企业私募债券以外的公司债券)承销;证券自营;证券资产管理;融资融券;证券投资基金代销;代销金融产品等。公司还通过控股子公司一创摩根从事投资银行业务,通过全资子公司一创期货从事期货业务,通过全资子公司一创投资、创新资本从事私募股权基金管理和另类投资业务,以及通过控股子公司创金合信开展基金管理业务。	IR@fcsc.com		www.firstcapital.com.cn	CNE1000027G0
106072	002797	第一创业	2017-12-31	第一创业证券股份有限公司	资本市场服务	J67	广东省深圳市福田区福华一路115号投行大厦20楼	广东省深圳市福田区福华一路115号投行大厦9、16-20楼	1998-01-12	2016-05-11	广东省	深圳市	518048	萧进华	0755-23838868	0755-23838877	IR@fcsc.com		91440300707743879G	报告期内公司无收购及出售资产、吸收合并事项	114.0518209095	22.5364530523	114.0518119095	22.5364230523	刘学民	从事证券经纪、财务顾问、证券(不含股票、中小企业私募债券以外的公司债券)承销、证券自营、证券资产管理以及资本中介等业务,并通过全资子公司从事直投、期货经纪、金融产品投资和其他另类投资等业务,通过控股子公司从事投资银行和基金管理业务。	3502400000	证券经纪;证券投资咨询;与证券交易、证券投资活动有关的财务顾问;证券(不含股票、中小企业私募债券以外的公司债券)承销;证券自营;证券资产管理;融资融券;为期货公司提供中间介绍业务;证券投资基金代销;代销金融产品等。	IR@fcsc.com		www.firstcapital.com.cn	CNE1000027G0
10138286	002841	视源股份	2018-12-31	广州视源电子科技股份有限公司	计算机、通信和其他电子设备制造业	C39	广东省广州市黄埔区云埔四路6号	广东省广州市黄埔区云埔四路6号	2005-12-28	2017-01-19	广东省	广州市	510530	程晓娜	020-32210275	020-82075579	shiyuan@cvte.com	刘洁	914401167837604004	报告期内公司无收购及出售资产、吸收合并事项	113.5268748797	23.1555129818	113.5267654097	23.1549904474	周勇	液晶显示主控板卡、交互智能平板、移动智能终端等电子类产品的设计、研发和销售。	650847840	技术进出口;工程和技术研究和试验发展;计算机、软件及辅助设备批发;货物进出口(专营专控商品除外);计算机、软件及辅助设备零售;家用视听设备零售;软件开发;信息技术咨询服务;计算机和辅助设备修理;家用电子产品修理;(依法须经批准的项目,经相关部门批准后方可开展经营活动)。	shiyuan@cvte.com		www.cvte.com	CNE100002K47
10375083	002925	盈趣科技	2018-12-31	厦门盈趣科技股份有限公司	计算机、通信和其他电子设备制造业	C39	福建省厦门市海沧区东孚大道2879号6#写字楼1层104单元之一	福建省厦门市高新区火炬园嘉禾路588号第七层	2011-05-24	2018-01-15	福建省	厦门市	361006	杨明	0592-5797666	0592-5701337	stock@intretech.com	高慧玲	913502005750038518	报告期内公司无收购及出售资产、吸收合并事项	118.1185285823	24.5162537461	117.9293754293	24.5577450213	吴凯庭	智能控制部件及创新消费电子产品的研发及生产。	458529500	为客户提供智能控制部件、创新消费电子等产品的研发、生产。	stock@intretech.com		www.intretech.com	CNE1000033H6
103176	300002	神州泰岳	2015-12-31	北京神州泰岳软件股份有限公司	软件和信息技术服务业	I65	北京市海淀区万泉庄路28号万柳新贵大厦A座6层601室	北京市朝阳区北苑路甲13号院1号楼22层	2001-05-18	2009-10-30	北京市	北京市	100107	黄松浪	010-58847555	010-58847583	IRM@ultrapower.com.cn	张黔山	91110000802090167W	报告期内公司无收购及出售资产、吸收合并事项	116.4173454014	40.0311749342	116.3016397135	39.9674357562	王宁	向国内电信、金融、能源等行业的大中型企业和政府部门提供IT运维管理的整体解决方案，包括软件产品开发与销售、技术服务和相应的系统集成	1994479926	计算机网络综合管理及网络系统集成、通讯设备技术开发、技术服务、技术转让、技术培训；电子信 息技术咨询（中介除外）；委托生产通讯设备；销售计算机网络软硬件产品、通讯设备；电子信息技术系统工程设计；通讯设备售后服务；技术进出口、代理进出口、货物进出口。（依法须经批准的项目，经相关部门批准后依批准的内容开展 经营活动。）	IRM@ultrapower.com.cn		www.ultrapower.com.cn	CNE100000H51
103195	300003	乐普医疗	2015-12-31	乐普(北京)医疗器械股份有限公司	专用设备制造业	C35	北京市昌平区超前路37号	北京市昌平区超前路37号	1999-06-11	2009-10-30	北京市	北京市	102200	张霞	010-80120666	010-80120776	zqb@lepumedical.com			报告期内公司无收购及出售资产、吸收合并事项	116.2567564468	40.2043228197	116.2557071468	40.2059152772	蒲忠杰	冠状动脉介入和先心病介入医疗器械的研发、生产和销售。	871785147	生产、销售医疗器械及其配件；医疗器械及其配件的技术开发；提供自产产品的技术 咨询服务；上述产品的进出口；技术进出口；佣金代理（不含拍卖，涉及配额许可证管理、专项规定管理 的商品按国家有关规定办理）。	zqb@lepumedical.com		www.lepumedical.com	CNE100000H44
103195	300003	乐普医疗	2016-12-31	乐普(北京)医疗器械股份有限公司	专用设备制造业	C35	北京市昌平区超前路37号	北京市昌平区超前路37号	1999-06-11	2009-10-30	北京市	北京市	102200	张霞	010-80120666	010-80120776	zqb@lepumedical.com		911100007000084768	报告期内公司无收购及出售资产、吸收合并事项	116.2567564468	40.2043228197	116.2557071468	40.2059152772	蒲忠杰	冠状动脉介入和先心病介入医疗器械的研发、生产和销售。	81200000	生产、销售医疗器械及其配件;医疗器械及其配件的技术开发;提供自产产品的技术咨询服务;上述产品的进出口;技术进出口;佣金代理(不含拍卖,涉及配额许可证管理、专项规定管理的商品按国家有关规定办理)。	zqb@lepumedical.com		www.lepumedical.com	CNE100000H44
103195	300003	乐普医疗	2017-12-31	乐普(北京)医疗器械股份有限公司	专用设备制造业	C35	北京市昌平区超前路37号	北京市昌平区超前路37号	1999-06-11	2009-10-30	北京市	北京市	102200	郭同军	010-80120666	010-80120776	zqb@lepumedical.com		911100007000084768	报告期内公司无收购及出售资产、吸收合并事项	116.2567564468	40.2043228197	116.2557071468	40.2059152772	蒲忠杰	冠状动脉介入和先心病介入医疗器械的研发、生产和销售。	1781652921	生产、销售医疗器械及其配件;医疗器械及其配件的技术开发;提供自产产品的技术咨询服务;上述产品的进出口;技术进出口;佣金代理(不含拍卖、涉及配额许可证管理、专项规定管理的商品按国家有关规定办理)。(依法须经批准的项目,经相关部门批准后依批准的内容开展经营活动。)	zqb@lepumedical.com		www.lepumedical.com	CNE100000H44
103195	300003	乐普医疗	2018-12-31	乐普(北京)医疗器械股份有限公司	专用设备制造业	C35	北京市昌平区超前路37号	北京市昌平区超前路37号	1999-06-11	2009-10-30	北京市	北京市	102200	郭同军	010-80120622	010-80120776	zqb@lepumedical.com		911100007000084768	出售重大股权情况:交易对方:默克公司;被出售股权:澳洲Viralytics公司13.04%股权;出售日:2018年06月01日;交易价格(万元):30,016.1;本期初起至出售日该股权为上市公司贡献的净利润(万元):15,006.44;出售对公司的影响:公司将继续专注于开发免疫肿瘤学疗法,积极寻求与其它跨国公司的合作机会;并将和默克公司保持沟通,争取未来在中国市场的合作可能性;股权出售为上市公司贡献的净利润占净利润总额的比例:11.96%;股权出售定价原则:市场定价;是否为关联交易:否;与交易对方的关联关系:无;所涉及的股权是否已全部过户:是;是否按计划如期实施,如未按计划实施,应当说明原因及公司已采取的措施:是;披露日期:2018年02月22日;披露索引:巨潮资讯网	116.2567564468	40.2043228197	116.2557071468	40.2059152772	蒲忠杰	冠状动脉介入和先心病介入医疗器械的研发、生产和销售。	1781652921	生产、销售医疗器械及其配件;医疗器械及其配件的技术开发;提供自产产品的技术咨询服务;上述产品的进出口;技术进出口;佣金代理(不含拍卖、涉及配额许可证管理、专项规定管理的商品按国家有关规定办理。	zqb@lepumedical.com		www.lepumedical.com	CNE100000H44
103052	300015	爱尔眼科	2015-12-31	爱尔眼科医院集团股份有限公司	卫生	Q83	湖南省长沙市隆平高科技园内	湖南省长沙市芙蓉中路二段198号新世纪大厦4楼	2003-01-24	2009-10-30	湖南省	长沙市	410015	吴士君	0731-82570739	0731-85179288-8039	zhengquanbu@yeah.net	文建惠	91430000745928604G	报告期内公司无收购及出售资产、吸收合并事项	112.9847681817	28.1756653908	113.0664767736	28.2157863249	陈邦	向患者提供各种眼科疾病的诊断、治疗及医学验光配镜等眼科医疗服务。	985560192	眼科医院的投资和医院经营管理服 务，眼科医疗技术的研究，验光配镜。	zhengquanbu@yeah.net		www.aierchina.com	CNE100000GR6
103052	300015	爱尔眼科	2016-12-31	爱尔眼科医院集团股份有限公司	卫生	Q83	湖南省长沙市芙蓉区长冲路99号隆平高科技园省科研成果转化中心一楼	湖南省长沙市芙蓉中路二段198号新世纪大厦4楼	2003-01-24	2009-10-30	湖南省	长沙市	410015	吴士君	0731-82570739	0731-85179288-8039	zhengquanbu@yeah.net	文建惠	91430000745928604G	报告期内公司无收购及出售资产、吸收合并事项	112.9847681817	28.1756653908	113.0729543636	28.2137762922	陈邦	向患者提供各种眼科疾病的诊断、治疗及医学验光配镜等眼科医疗服务。	1007179414	眼科医院的投资和医院经营管理服务,眼科医疗技术的研究,验光配镜。	zhengquanbu@yeah.net		www.aierchina.com	CNE100000GR6
103052	300015	爱尔眼科	2017-12-31	爱尔眼科医院集团股份有限公司	卫生	Q83	湖南省长沙市芙蓉区长冲路99号隆平高科技园省科研成果转化中心一楼	湖南省长沙市芙蓉中路二段198号新世纪大厦4楼	2003-01-24	2009-10-30	湖南省	长沙市	410015	吴士君	0731-82570739	0731-85179288-8039	zhengquanbu@yeah.net	文建惠	91430000745928604G	报告期内公司无收购及出售资产、吸收合并事项	112.9847681817	28.1756653908	113.0729543636	28.2137762922	陈邦	向患者提供各种眼科疾病的诊断、治疗及医学验光配镜等眼科医疗服务。	1520014964	眼科医院的投资和医院经营管理服务,眼科医疗技术的研究,医学验光配镜。	zhengquanbu@yeah.net		www.aierchina.com	CNE100000GR6
103052	300015	爱尔眼科	2018-12-31	爱尔眼科医院集团股份有限公司	卫生	Q83	湖南省长沙市芙蓉区长冲路99号隆平高科技园省科研成果转化中心一楼	湖南省长沙市芙蓉中路二段198号新世纪大厦4楼	2003-01-24	2009-10-30	湖南省	长沙市	410015	吴士君	0731-85136739	0731-85179288-8039	zhengquanbu@yeah.net	黄强	91430000745928604G	报告期内公司无收购及出售资产、吸收合并事项	112.9847681817	28.1756653908	113.0729543636	28.2137762922	陈邦	向患者提供各种眼科疾病的诊断、治疗及医学验光配镜等眼科医疗服务。	2383380148	眼科医院的投资和医院经营管理服务,眼科医疗技术的研究,医学验光配镜	zhengquanbu@yeah.net		www.aierchina.com	CNE100000GR6
103135	300017	网宿科技	2015-12-31	网宿科技股份有限公司	软件和信息技术服务业	I65	上海市嘉定环城路200号	上海市徐汇区斜土路2899号光启文化广场甲幢5楼	2000-01-26	2009-10-30	上海市	上海市	200030	周丽萍	021-64685982	021-64879605	wangsudmb@chinanetcenter.com	魏晶晶	91310000631658829P	报告期内公司无收购及出售资产、吸收合并事项	121.4416803895	31.1849123658	121.2544006537	31.393827753	刘成彦	互联网业务平台综合服务，细分产品为CDN（内容分发加速网络）服务和IDC（互联网数据中心）服务。	707978860	计算机软硬件的技术开发、技术转让、技术咨询、技术服务,信息采集,信息发布,信息系统集成,经济信息服务,第一类增值电信业务中的因特网数据中心业务、第二类增值电信业务中的因特网接入服务业务,计算机软硬件及配件、办公设备的销售,从事货物及技术的进出口业务(涉及行政许可的,凭许可证经营)。 主要产品或提供的劳务：内容分发网络业务（ContentDeliveryNetwork，简称CDN）、互联网数据中心业务 （InternetDataCenter，简称IDC）。	wangsudmb@chinanetcenter.com		www.chinanetcenter.com	CNE100000GQ8
103135	300017	网宿科技	2016-12-31	网宿科技股份有限公司	软件和信息技术服务业	I65	上海市嘉定区环城路200号	上海市徐汇区斜土路2899号光启文化广场A幢5楼	2000-01-26	2009-10-30	上海市	上海市	200030	周丽萍	021-64685982	021-64879605	wangsudmb@chinanetcenter.com	魏晶晶	91310000631658829P	报告期内公司无收购及出售资产、吸收合并事项	121.4411160195	31.1855777037	121.2544376537	31.393972753	刘成彦	互联网业务平台综合服务，细分产品为CDN（内容分发加速网络）服务和IDC（互联网数据中心）服务。	789384564	计算机软硬件的技术开发、技术转让、技术咨询、技术服务,信息采集,信息发布,信息系统集成,经济信息服务,第一类增值电信业务中的因特网数据中心业务、第二类增值电信业务中的因特网接入服务业务,计算机软硬件及配件、办公设备的销售,从事货物及技术的进出口业务(依法须经批准的项目,经相关部分批准后方可开展经营活动)。主要产品或提供的劳务:内容分发网络业务(ContentDeliveryNetwork,简称CDN)、互联网数据中心业务(InternetDataCenter,简称IDC)。	wangsudmb@chinanetcenter.com		www.chinanetcenter.com	CNE100000GQ8
103135	300017	网宿科技	2017-12-31	网宿科技股份有限公司	软件和信息技术服务业	I65	上海市嘉定环城路200号	上海市徐汇区斜土路2899号光启文化广场A幢5楼	2000-01-26	2009-10-30	上海市	上海市	200030	周丽萍	021-64685982	021-64879605	wangsudmb@wangsu.com	魏晶晶	91310000631658829P	报告期内公司无收购及出售资产、吸收合并事项	121.2541516537	31.393758753	121.2544006537	31.393827753	刘成彦	互联网业务平台综合服务，细分产品为CDN（内容分发加速网络）服务和IDC（互联网数据中心）服务。	2411424103	内容分发网络业务(ContentDeliveryNetwork,简称CDN)、互联网数据中心业务(InternetDataCenter,简称IDC)、云计算(计算服务、存储服务、网络服务、管理服务,以及专有云、混合云、行业云解决方案等)、设备销售(网络设备、计算设备等)等。	wangsudmb@wangsu.com		www.wangsu.com	CNE100000GQ8
103135	300017	网宿科技	2018-12-31	网宿科技股份有限公司	软件和信息技术服务业	I65	上海市嘉定环城路200号	上海市徐汇区斜土路2899号光启文化广场A幢5楼	2000-01-26	2009-10-30	上海市	上海市	200030	周丽萍	021-64685982	021-64879605	wangsudmb@wangsu.com	魏晶晶	91310000631658829P	出售重大股权情况:交易对方:苏州思达柯数据科技有限公司(以下简称"苏州思达柯");被出售股权:厦门秦淮100%股权;出售日:尚未完成交割;交易价格(万元):99,000;本期初起至出售日该股权为上市公司贡献的净利润(万元):不适用;出售对公司的影响:本次出售公司持有的厦门秦淮全部股权是基于公司战略规划,未来,公司将重点聚焦在CDN、云安、云安全、云计算以及边全、云计算以及边缘计算的技术研发及业务开拓。因自建互联网数据中心前期投入资金量大、项目回收金量大、项目回收周期相对较长,通周期相对较长,通过出售厦门秦淮全部股权,减轻公司资金投入压力,从而将资金投入到公司重点布局业务。本次交易对本报告期业绩不产生影响;股权出售为上市公司贡献的净利润占净利润总额的比例:不适用;股权出售定价原则:根据上海东洲资产评估有限公司(以下简称“东洲评估”)出具的《资产评估报告》(东洲评报字【2018】第1225号…	121.4412820195	31.1856127037	121.2544376537	31.393972753	刘成彦	互联网业务平台综合服务，细分产品为CDN（内容分发加速网络）服务和IDC（互联网数据中心）服务。	2432818617	内容分发网络业务(Content Delivery Network,简称CDN)、互联网数据中心业务(Internet Data Center,简称IDC)、云计算(计算服务、存储服务、网络服务、云主机、云安全服务和行业专业云等)、设备销售(网络设备、计算设备等)、软件开发等。	wangsudmb@wangsu.com		www.wangsu.com	CNE100000GQ8
102757	300024	机器人	2015-12-31	沈阳新松机器人自动化股份有限公司	通用设备制造业	C34	辽宁省沈阳市浑南新区金辉街16号	辽宁省沈阳市浑南新区金辉街16号	2000-04-30	2009-10-30	辽宁省	沈阳市	110168	赵立国	024-31699888	024-31680024	zqb@siasun.com	赵陈晨	91210000719642231W	报告期内公司无收购及出售资产、吸收合并事项	123.46833946	41.7189884918	123.46823846	41.7189364918	曲道奎	从事工业机器人、物流与仓储自动化成套装备、自动化装配与检测生产线及系统集成、交通自动化系统等产品的设计、制造和销售。	709199826	机器人与自动化装备、自动化立体仓库及仓储物流设备、机械电子设备、大型自动化系统与生产线开发、制造、工程安装;信息技术与网络系统设计、开发、技术咨询、服务、转让;计算机机械电子设备及配件销售,自营和代理货物及技术进出口(国家禁止的不得经营,限制的品种办理许可证后方可经营),海洋自动化装备、油田自动化装备、激光技术及装备、低压成套开关和控制设备开发、制造、工程安装,公路、隧道、轨道交通综合监控系统、建筑智能化及机电工程设计、制造、工程安装,智能机电及信息产品设计、制造、租赁、销售,光电技术及产品开发、制造、销售,公共服务机器人设计、制造、销售;安防工程设计、施工。(依法须经批准的项目,经相关部门批准后方可开展经营活动。)公司主要产品包括工业机器人、物流与仓储自动化成套装备、自动化装配与检测生产线、交通自动化系统等。	zqb@siasun.com		www.siasun.com	CNE100000GH7
102757	300024	机器人	2016-12-31	沈阳新松机器人自动化股份有限公司	通用设备制造业	C34	辽宁省沈阳市浑南新区金辉街16号	辽宁省沈阳市浑南新区金辉街16号	2000-04-30	2009-10-30	辽宁省	沈阳市	110168	赵立国	024-31699888	024-31680024	zlg5335@163.com	赵陈晨	91210000719642231W	报告期内公司无收购及出售资产、吸收合并事项	123.46833946	41.7189884918	123.46823846	41.7189364918	于海斌	从事工业机器人、物流与仓储自动化成套装备、自动化装配与检测生产线及系统集成、交通自动化系统等产品的设计、制造和销售。	1560239600	机器人与自动化装备、自动化立体仓库及仓储物流设备、机械电子设备、大型自动化系统与生产线开发、制造、工程安装;信息技术与网络系统设计、开发、技术咨询、服务、转让;计算机机械电子设备及配件销售,自营和代理货物及技术进出口(国家禁止的不得经营,限制的品种办理许可证后方可经营),海洋自动化装备、油田自动化装备、激光技术及装备、低压成套开关和控制设备开发、制造、工程安装,公路、隧道、轨道交通综合监控系统、建筑智能化及机电工程设计、制造、工程安装,智能机电及信息产品设计、制造、租赁、销售,光电技术及产品开发、制造、销售,公共服务机器人设计、制造、销售;安防工程设计、施工。(依法须经批准的项目,经相关部门批准后方可开展经营活动。)公司主要产品包括工业机器人、物流与仓储自动化成套装备、自动化装配与检测生产线及系统集成、交通自动化系统等。	zqb@siasun.com		www.siasun.com	CNE100000GH7
102757	300024	机器人	2017-12-31	沈阳新松机器人自动化股份有限公司	通用设备制造业	C34	辽宁省沈阳市浑南新区金辉街16号	辽宁省沈阳市浑南新区全运路33号	2000-04-30	2009-10-30	辽宁省	沈阳市	110169	赵立国	024-31165858	024-31680024	zlg5335@163.com	赵陈晨	91210000719642231W	报告期内公司无收购及出售资产、吸收合并事项	123.5119390296	41.7339402368	123.46823846	41.7189364918	曲道奎	从事工业机器人、物流与仓储自动化成套装备、自动化装配与检测生产线及系统集成、交通自动化系统等产品的设计、制造和销售。	1560239600	机器人与自动化装备、自动化立体仓库及仓储物流设备、机械电子设备、大型自动化系统与生产线开发、制造、工程安装;信息技术与网络系统设计、开发、技术咨询、服务、转让;计算机机械电子设备及配件销售,自营和代理货物及技术进出口(国家禁止的不得经营,限制的品种办理许可证后方可经营),海洋自动化装备、油田自动化装备、激光技术及装备、低压成套开关和控制设备开发、制造、工程安装,公路、隧道、轨道交通综合监控系统、建筑智能化及机电工程设计、制造、工程安装,智能机电及信息产品设计、制造、租赁、销售,光电技术及产品开发、制造、销售,公共服务机器人设计、制造、销售;安防工程设计、施工。(依法须经批准的项目,经相关部门批准后方可开展经营活动。)	zqb@siasun.com		www.siasun.com	CNE100000GH7
102757	300024	机器人	2018-12-31	沈阳新松机器人自动化股份有限公司	通用设备制造业	C34	辽宁省沈阳市浑南新区金辉街16号	辽宁省沈阳市浑南新区全运路33号	2000-04-30	2009-10-30	辽宁省	沈阳市	110169	赵立国	024-31165858	024-31680024	zlg5335@163.com	赵陈晨	91210000719642231W	报告期内公司无收购及出售资产、吸收合并事项	123.488847647	41.687403837	123.46823846	41.7189364918	曲道奎	从事工业机器人、物流与仓储自动化成套装备、自动化装配与检测生产线及系统集成、交通自动化系统等产品的设计、制造和销售。	1560239600	机器人与自动化装备、自动化立体仓库及仓储物流设备、机械电子设备、大型自动化系统与生产线开发、制造、工程安装;信息技术与网络系统设计、开发、技术咨询、服务、转让;计算机机械电子设备及配件销售,自营和代理货物及技术进出口(国家禁止的不得经营,限制的品种办理许可证后方可经营),海洋自动化装备、油田自动化装备、激光技术及装备、低压成套开关和控制设备开发、制造、工程安装,公路、隧道、轨道交通综合监控系统、建筑智能化及机电工程设计、制造、工程安装,智能机电及信息产品设计、制造、租赁、销售,光电技术及产品开发、制造、销售,公共服务机器人设计、制造、销售;安防工程设计、施工。(依法须经批准的项目,经相关部门批准后方可开展经营活动。)公司主要产品包括工业机器人、物流与仓储自动化成套装备、自动化装配与检测生产线、交通自动化系统等。	zqb@siasun.com		www.siasun.com	CNE100000GH7
102865	300027	华谊兄弟	2015-12-31	华谊兄弟传媒股份有限公司	广播、电视、电影和影视录音制作业	R86	浙江省东阳市横店影视产业实验区C1-001	北京市朝阳区朝阳门外大街18号丰联广场A座908室	2004-11-19	2009-10-30	浙江省	东阳市	100020	匡娜	010-65805818	010-65881512	ir@huayimedia.com	张一君		出售重大股权情况： （1）报告期内，公司与兄弟姐妹（天津）文化信息咨询合伙企业（有限合伙）于2015年5月18日签署《股权转让协议》，公司将其在北京华谊兄弟新媒体技术有限公司（现已依法整体变更、发起设立为北京华谊兄弟创星娱乐科技股份有限公司）4%的股权以人民币480万元的价格转让给兄弟姐妹（天津）文化信息咨询合伙企业（有限合伙）。2015年5月19日，该股权转让已经办理完毕工商备案登记。 截止报告期末，公司持有北京华谊兄弟创星娱乐科技股份有限公司51.67%的股权。 （2）华谊兄弟（天津）互动娱乐有限公司、江苏耀莱影城管理有限公司其他股东、江苏耀莱影城管理有限公司与松辽汽车股份有限公司于2014年8月31日共同签署《关于江苏耀莱影城管理有限公司之附条件生效的股权转让协议》。公司之子公司华谊兄弟（天津）互动娱乐有限公司拟出让其持有的江苏耀莱影城管理有限公司20%的股权给松辽汽车股份有限公司…	116.4381396893	39.9242001073	120.2866764495	29.1564543694	王忠军	电影的制作、发行及衍生业务；电视剧的制作、发行及衍生业务；艺人经纪服务及相关服务业务。	1391726324	制作、复制、发行：专题、专栏、综艺、动画片、广播剧、电视剧（广播电视节目制作经营许可证有效期至2017年4月1日止）；国产影片发行（凭《电影发行经营许可证》有效期至2017年2月15日）；摄制电影（单片）。企业形象策划；影视文化信息咨询服务；影视广告制作、代理、发行；影视项目的投资管理；经营进出口业务；互联网信息服务。（上述经营范围不含国家法律法规规定禁止、限制和许可经营项目。）	ir@huayimedia.com		www.huayimedia.com	CNE100000GD6
102865	300027	华谊兄弟	2016-12-31	华谊兄弟传媒股份有限公司	广播、电视、电影和影视录音制作业	R86	浙江省东阳市横店影视产业实验区C1-001	北京市朝阳区新源南路甲2号华谊兄弟办公大楼	2004-11-19	2009-10-30	浙江省	东阳市	100027	高辉	010-65805818	010-65881512	ir@huayimedia.com	谢婧超	91330000768691187H	出售重大股权情况:交易对方:马克;大地时创电影发行(北京)有限公司;被出售股权:天津滨海新区华谊启明东方暖公关顾问有限责任公司22%的股权;华影天下(天津)电影发行有限责任公司12%的股权;出售日:2016年12月25日;2016年12月28日;交易价格(万元):2,428.80;600.00;股权出售定价原则:市场公允价值;市场公允价值;是否为关联交易:否;否	116.4581417028	39.9486258199	120.2866764495	29.1564543694	王忠军	电影的制作、发行及衍生业务；电视剧的制作、发行及衍生业务；艺人经纪服务及相关服务业务。	2785686394	从事制作、复制、发行:专题、专栏、综艺、动画片、广播剧、电视剧(凭《广播电视节目制作经营许可证》经营);国产影片发行(凭《电影发行经营许可证》经营);摄制电影(单片)。企业形象策划;影视文化信息咨询服务;影视广告制作、代理、发行;影视项目的投资管理;经营进出口业务;实业投资、投资管理、资产管理(未经金融等监管部门批准,不得从事向公众融资存款、融资担保、代客理财等金融服务),投资咨询,企业管理咨询,经济信息咨询;互联网信息服务。(上述经营范围不含国家法律法规规定禁止、限制和许可经营项目。)	ir@huayimedia.com		www.huayimedia.com	CNE100000GD6
102865	300027	华谊兄弟	2017-12-31	华谊兄弟传媒股份有限公司	广播、电视、电影和影视录音制作业	R86	浙江省东阳市横店影视产业实验区C1-001	北京市朝阳区新源南路甲2号华谊兄弟办公大楼	2004-11-19	2009-10-30	浙江省	东阳市	100027	高辉	010-65805818	010-65881512	ir@huayimedia.com	谢婧超	91330000768691187H	出售重大股权情况:交易对方:林芝家兴信息科技有限公司;冷美华;上海电影股份有限公司;被出售股权:广州银汉科技有限公司25.88%的股权;广州银汉科技有限公司25.88%的股权;华影天下(天津)电影发行有限责任公司12%的股权;出售日:2017年6月12日;2017年6月12日;2017年3月10日;交易价格(万元):64,700.00;64,700.00;600.00;本期初起至出售日该股权为上市公司贡献的净利润(万元):53,595.25;53,595.25;-;股权出售为上市公司贡献的净利润占净利润总额的比例:64.71%;64.71%;-;股权出售定价原则:市场公允价值;市场公允价值;-;是否为关联交易:是;否;-;与交易对方的关联关系:深圳市腾讯计算机系统有限公司作为持有公司5%以上股份的股东,是公司关联方,林芝家兴信息科技有限公司与深圳市腾讯计算机系统有限公司存在关联关系,本次…	116.4581417028	39.9486258199	120.2866764495	29.1564543694	王忠军	电影的制作、发行及衍生业务；电视剧的制作、发行及衍生业务；艺人经纪服务及相关服务业务。	2774505919	制作、复制、发行:专题、专栏、综艺、动画片、广播剧、电视剧(凭《广播电视节目制作经营许可证》经营);国产影片发行(凭《电影发行经营许可证》经营);摄制电影(单片)。企业形象策划;影视文化信息咨询服务;影视广告制作、代理、发行;影视项目的投资管理;经营进出口业务;实业投资、投资管理、资产管理(未经金融等监管部门批准,不得从事向公众融资存款、融资担保、代客理财等金融服务),投资咨询,企业管理咨询,经济信息咨询;互联网信息服务。(上述经营范围不含国家法律法规规定禁止、限制和许可经营项目。)	ir@huayimedia.com		www.huayimedia.com	CNE100000GD6
103436	300033	同花顺	2016-12-31	浙江核新同花顺网络信息股份有限公司	软件和信息技术服务业	I65	浙江省杭州市余杭区五常街道同顺街18号	浙江省杭州市余杭区五常街道同顺街18号	2001-08-24	2009-12-25	浙江省	杭州市	310023	朱志峰	0571-88852766	0571-88911818-8001	myhexin@myhexin.com	唐俊克	9133000070337747XE	报告期内公司无收购及出售资产、吸收合并事项	120.0459996209	30.2921166248	120.0461776209	30.2922726248	易峥	为国内资本市场提供金融资讯、数据分析和软件系统服务。	537600000	互联网金融信息服务及其相关软件产品的研发、销售和维护。提供的劳务和产品主要有:增值电信服务、广告和互联网业务推广服务、基金代销等业务和软件的销售、维护。	myhexin@myhexin.com		www.10jqka.com.cn	CNE100000JG3
103436	300033	同花顺	2017-12-31	浙江核新同花顺网络信息股份有限公司	软件和信息技术服务业	I65	浙江省杭州市余杭区五常街道同顺街18号	浙江省杭州市余杭区五常街道同顺街18号	2001-08-24	2009-12-25	浙江省	杭州市	310023	朱志峰	0571-88852766	0571-88911818-8001	myhexin@myhexin.com	唐俊克	9133000070337747XE	报告期内公司无收购及出售资产、吸收合并事项	120.0459996209	30.2921166248	120.0461776209	30.2922726248	易峥	为国内资本市场提供金融资讯、数据分析和软件系统服务。	537600000	互联网金融信息服务及其相关软件产品的研发、销售和维护。提供的劳务和产品主要有:增值电信服务、广告和互联网业务推广服务、基金代销等经纪业务和软件的销售、维护。	myhexin@myhexin.com		www.10jqka.com.cn	CNE100000JG3
103436	300033	同花顺	2018-12-31	浙江核新同花顺网络信息股份有限公司	软件和信息技术服务业	I65	浙江省杭州市余杭区五常街道同顺街18号	浙江省杭州市余杭区五常街道同顺街18号	2001-08-24	2009-12-25	浙江省	杭州市	310023	朱志峰	0571-88852766	0571-88911818-8001	myhexin@myhexin.com	唐俊克	9133000070337747XE	报告期内公司无收购及出售资产、吸收合并事项	120.0459996209	30.2921166248	120.0461776209	30.2922726248	易峥	为国内资本市场提供金融资讯、数据分析和软件系统服务。	537600000	互联网金融信息服务及其相关软件产品的研发、销售和维护。提供的劳务和产品主要有:增值电信服务、广告和互联网业务推广服务、基金代销等经纪业务和软件的销售、维护。	myhexin@myhexin.com		www.10jqka.com.cn	CNE100000JG3
103151	300058	蓝色光标	2015-12-31	北京蓝色光标品牌管理顾问股份有限公司	商务服务业	L72	北京市朝阳区酒仙桥路甲10号3号楼20层20A	北京市朝阳区酒仙桥北路9号恒通国际创新园C9楼	2002-11-04	2010-02-26	北京市	北京市	100015	许志平	010-56478871	010-56478000	bfg@bluefocus.com	蔡庆虹		报告期内公司无收购及出售资产、吸收合并事项	116.4926292421	39.9881167227	116.4904787121	39.9798189428	赵文权	公共关系服务	1931169473	企业形象策划;营销信息咨询(中介除外);公关咨询;会议服务;公共关系专业 培训;设计、制作、代理、发布广告。	bfg@bluefocus.com		www.bluefocusgroup.com	CNE100000LV8
103152	300059	东方财富	2015-12-31	东方财富信息股份有限公司	互联网和相关服务	I64	上海市嘉定区宝安公路2999号1幢	上海市龙田路195号3号楼C座9楼	2005-01-20	2010-03-19	上海市	上海市	200030	陆威	021-64382978	021-64389508	dongmi@eastmoney.com	荣兴	913100007714584745	报告期内公司无收购及出售资产、吸收合并事项	121.4412839595	31.173586457	121.2910194014	31.3327240441	其实	网络财经信息服务业，向用户提供专业的、及时的、海量的资讯信息，满足其对于财经资讯和金融信息的需求。业务内容主要包括互联网广告服务以及金融数据服务。	1853892052	第二类增值电信业务中的信息服务业务（以经营许可证为准），企业投资咨 询、策划，商务咨询，会务会展咨询服务，计算机软硬件及网络系统的技术开发、技术服务、技术 咨询、技术转让，设计、制作、发布、代理国内外各类广告(依法须经批准的项目，经相关部门批 准后方可开展经营活动)。	dongmi@eastmoney.com		www.eastmoney.com	CNE100000MD4
103152	300059	东方财富	2016-12-31	东方财富信息股份有限公司	互联网和相关服务	I64	上海市嘉定区宝安公路2999号1幢	上海市徐汇区宛平南路88号金座	2005-01-20	2010-03-19	上海市	上海市	200030	陆威	021-54660526	021-54660501	dongmi@eastmoney.com	荣兴	913100007714584745	报告期内公司无收购及出售资产、吸收合并事项	121.4451525663	31.1957435648	121.2910194014	31.3327240441	其实	网络财经信息服务业，向用户提供专业的、及时的、海量的资讯信息，满足其对于财经资讯和金融信息的需求。业务内容主要包括互联网广告服务以及金融数据服务。	3558321299	第二类增值电信业务中的呼叫中心业务和信息服务业务(以经营许可证为准),企业投资咨询、策划,商务咨询,会务会展咨询服务,计算机软硬件及网络系统的技术开发、技术服务、技术咨询、技术转让,设计、制作、发布、代理国内外各类广告,经营性互联网文化信息服务。【依法须经批准的项目,经相关部门批准后方可开展经营活动】	dongmi@eastmoney.com		www.eastmoney.com	CNE100000MD4
103152	300059	东方财富	2017-12-31	东方财富信息股份有限公司	互联网和相关服务	I64	上海市嘉定区宝安公路2999号1幢	上海市徐汇区宛平南路88号金座	2005-01-20	2010-03-19	上海市	上海市	200030	陆威	021-54660526	021-54660501	dongmi@eastmoney.com	杨浩	913100007714584745	报告期内公司无收购及出售资产、吸收合并事项	121.4451525663	31.1957435648	121.2910194014	31.3327240441	其实	网络财经信息服务业，向用户提供专业的、及时的、海量的资讯信息，满足其对于财经资讯和金融信息的需求。业务内容主要包括互联网广告服务以及金融数据服务。	4288779718	第二类增值电信业务中的呼叫中心业务和信息服务业务(以经营许可证为准),企业投资咨询、策划,商务咨询,会务会展咨询服务,计算机软硬件及网络系统的技术开发、技术服务、技术咨询、技术转让,设计、制作、发布、代理国内外各类广告,经营性互联网文化信息服务。【依法须经批准的项目,经相关部门批准后方可开展经营活动】	dongmi@eastmoney.com		www.eastmoney.com	CNE100000MD4
103152	300059	东方财富	2018-12-31	东方财富信息股份有限公司	互联网和相关服务	I64	上海市嘉定区宝安公路2999号1幢	上海市徐汇区宛平南路88号金座	2005-01-20	2010-03-19	上海市	上海市	200030	陆威	021-54660526	021-54660501	dongmi@eastmoney.com	杨浩	913100007714584745	报告期内公司无收购及出售资产、吸收合并事项	121.4451525663	31.1957435648	121.2910194014	31.3327240441	其实	网络财经信息服务业，向用户提供专业的、及时的、海量的资讯信息，满足其对于财经资讯和金融信息的需求。业务内容主要包括互联网广告服务以及金融数据服务。	5168285026	第二类增值电信业务中的呼叫中心业务和信息服务业务(以经营许可证为准),企业投资咨询、策划,商务咨询,会务会展咨询服务,计算机软硬件及网络系统的技术开发、技术服务、技术咨询、技术转让,设计、制作、发布、代理国内外各类广告,经营性互联网文化信息服务,自有房屋租赁。【依法须经批准的项目,经相关部门批准后方可开展经营活动】	dongmi@eastmoney.com		www.eastmoney.com	CNE100000MD4
103034	300070	碧水源	2015-12-31	北京碧水源科技股份有限公司	生态保护和环境治理业	N77	北京市海淀区生命科学园路23-2号碧水源大厦	北京市海淀区生命科学园路23-2号碧水源大厦	2001-07-17	2010-04-21	北京市	北京市	102206	何愿平	010-88465890	010-88434847	IR@originwater.com	张兴		报告期内公司无收购及出售资产、吸收合并事项	116.2729105191	40.0935986294	116.2732555191	40.0938176294	文剑平	从事污水处理与污水资源化技术的开发及应用。	1229459678	污水处理和污水资源化领域的技术研究与开发、设备制造与销 售、工程设计与承包建设、技术服务、托管运营等;安全饮水、给水和纯水处理、固体废弃物处理、大气 环境治理、水资源管理、生态工程和生态修复等领域的技术研究与开发、设备制造与销售、工程设计与承 包建设、技术服务、托管运营等;水务领域投资。	IR@originwater.com		www.originwater.com	CNE100000N95
103034	300070	碧水源	2016-12-31	北京碧水源科技股份有限公司	生态保护和环境治理业	N77	北京市海淀区生命科学园路23-2号碧水源大厦	北京市海淀区生命科学园路23-2号碧水源大厦	2001-07-17	2010-04-21	北京市	北京市	102206	何愿平	010-88465890	010-88434847	IR@originwater.com	张兴	91110000802115985Y	报告期内公司无收购及出售资产、吸收合并事项	116.2729105191	40.0935986294	116.2732555191	40.0938176294	文剑平	从事污水处理与污水资源化技术的开发及应用。	3126855313	污水处理和污水资源化领域的技术研究与开发、设备制造与销售、工程设计与承包建设、技术服务、托管运营等;安全饮水、给水和纯水处理、固体废弃物处理、大气环境治理、水资源管理、生态工程和生态修复等领域的技术研究与开发、设备制造与销售、工程设计与承包建设、技术服务、托管运营等;水务领域投资。	IR@originwater.com		www.originwater.com	CNE100000N95
103034	300070	碧水源	2017-12-31	北京碧水源科技股份有限公司	生态保护和环境治理业	N77	北京市海淀区生命科学园路23-2号碧水源大厦	北京市海淀区生命科学园路23-2号碧水源大厦	2001-07-17	2010-04-21	北京市	北京市	102206	张兴	010-88465890	010-88434847	IR@originwater.com	姜为	91110000802115985Y	报告期内公司无收购及出售资产、吸收合并事项	116.2729105191	40.0935986294	116.2732555191	40.0938176294	文剑平	从事污水处理与污水资源化技术的开发及应用。	3126855313	污水处理和污水资源化领域的技术研究与开发、设备制造与销售、工程设计与承包建设、技术服务、托管运营等;安全饮水、给水和纯水处理、固体废弃物处理、大气环境治理、水资源管理、生态工程和生态修复等领域的技术研究与开发、设备制造与销售、工程设计与承包建设、技术服务、托管运营等;水务领域投资。	IR@originwater.com		www.originwater.com	CNE100000N95
103034	300070	碧水源	2018-12-31	北京碧水源科技股份有限公司	生态保护和环境治理业	N77	北京市海淀区生命科学园路23-2号碧水源大厦	北京市海淀区生命科学园路23-2号碧水源大厦	2001-07-17	2010-04-21	北京市	北京市	102206	张兴	010-88465890	010-88434847	IR@originwater.com	姜为	91110000802115985Y	报告期内公司无收购及出售资产、吸收合并事项	116.2729105191	40.0935986294	116.2732555191	40.0938176294	文剑平	从事污水处理与污水资源化技术的开发及应用。	3150510734	污水处理和污水资源化领域的技术研究与开发、设备制造与销售、工程设计与承包建设、技术服务、托管运营等;安全饮水、给水和纯水处理、固体废弃物处理、大气环境治理、水资源管理、生态工程和生态修复等领域的技术研究与开发、设备制造与销售、工程设计与承包建设、技术服务、托管运营等;水务领域投资。	IR@originwater.com		www.originwater.com	CNE100000N95
103132	300072	三聚环保	2016-12-31	北京三聚环保新材料股份有限公司	化学原料及化学制品制造业	C26	北京市海淀区人大北路33号1号楼大行基业大厦9层	北京市海淀区人大北路33号1号楼大行基业大厦9层	1997-06-03	2010-04-27	北京市	北京市	100080	曹华锋	010-82685562	010-82684108	investor@sanju.cn	关爽	91110000633025574Y	报告期内公司无收购及出售资产、吸收合并事项	116.3070089668	39.9733706707	116.3071219668	39.9730526707	刘雷	脱硫净化剂、脱硫催化剂、其他净化剂（脱氯剂、脱砷剂等）、特种催化材料及催化剂等的研发、生产、销售、技术咨询和技术服务。	1195595892	委托生产、加工化工产品;销售机械设备、化工产品(不含危险化学品及一类易制毒化学品);煤炭(不在北京地区开展实物煤的交易、储运活动)、焦炭、燃料油、润滑油、润滑油的基础油、蜡油、化肥、生物质炭、土壤改良剂;货物进出口、技术进出口、代理进出口;技术开发、技术转让、技术推广、技术咨询、技术服务;机械设备设计;施工总承包;工程项目管理;工程勘察设计、规划设计;市场调查;企业管理;资产管理、投资管理;经济贸易咨询、投资咨询、企业管理咨询;企业策划、设计;商务服务;租赁机械设备。(企业依法自主选择经营项目,开展经营活动;依法须经批准的项目,经相关部门批准后依批准的内容开展经营活动;不得从事本市产业政策禁止和限制类项目的经营活动。)主要产品(或提供的劳务等)销售能源净化产品、实施能源净化项目、提供能源净化综合服务等。	investor@sanju.cn		www.sanju.cn	CNE100000NP6
103132	300072	三聚环保	2017-12-31	北京三聚环保新材料股份有限公司	化学原料及化学制品制造业	C26	北京市海淀区人大北路33号1号楼大行基业大厦9层	北京市海淀区西直门北大街甲43号金运大厦A座8层、9层、13层	1997-06-03	2010-04-27	北京市	北京市	100044	曹华锋	010-82685562	010-82684108	investor@sanju.cn	关爽	91110000633025574Y	报告期内公司无收购及出售资产、吸收合并事项	116.3551050752	39.9507924861	116.3071219668	39.9730526707	刘雷	脱硫净化剂、脱硫催化剂、其他净化剂（脱氯剂、脱砷剂等）、特种催化材料及催化剂等的研发、生产、销售、技术咨询和技术服务。	1808079963	催化剂、净化剂等能源净化产品的研发、生产和销售;为煤化工、石油化工、天然气化工等能源化工行业及油气田开采业提供成套的催化净化工艺、催化剂、净化剂产品、装备及成套服务,以及可循环使用的净化剂产品等能源净化综合服务;为煤化工、石油化工、天然气化工等企业提供产业转型升级、原料改造、尾气综合利用、环保治理工艺技术、工程总承包、生产管理、综合运营服务等整体解决方案、项目总承包、方案实施及综合运营服务;为企业的清洁能源产品和精细化工产品提供低成本的生产、物流、销售的增值技术服务;提供重油、煤焦油等重质、劣质原料加工的技术许可、成套工艺、核心装备、工程建造及相关技术服务;提供农作物秸秆等生物质综合循环利用生产炭基复合肥、土壤改良剂等产品的技术许可、成套工艺、核心装备、工程建造及相关技术和运营服务,向绿色能源领域不断拓展。	investor@sanju.cn		www.sanju.cn	CNE100000NP6
103132	300072	三聚环保	2018-12-31	北京三聚环保新材料股份有限公司	化学原料及化学制品制造业	C26	北京市海淀区人大北路33号1号楼大行基业大厦9层	北京市海淀区西直门北大街甲43号金运大厦A座8层、9层、13层	1997-06-03	2010-04-27	北京市	北京市	100044	曹华锋	010-82685562	010-82684108	investor@sanju.cn	张冠卿	91110000633025574Y	报告期内公司无收购及出售资产、吸收合并事项	116.3551050752	39.9507924861	116.3071219668	39.9730526707	刘雷	脱硫净化剂、脱硫催化剂、其他净化剂（脱氯剂、脱砷剂等）、特种催化材料及催化剂等的研发、生产、销售、技术咨询和技术服务。	2350503951	(1)环保新材料及化工产品的研发、生产与销售。(2)化石能源产业综合服务。(3)生态农业与绿色能源服务。(4)油气设施制造及综合服务。(5)贸易增值服务。	investor@sanju.cn		www.sanju.cn	CNE100000NP6
103353	300104	乐视网	2015-12-31	乐视网信息技术(北京)股份有限公司	互联网和相关服务	I64	北京市海淀区学院南路68号19号楼六层6184号房间	北京市朝阳区姚家园路105号院3号楼宏城鑫泰大厦16层	2004-11-10	2010-08-12	北京市	北京市	100025	赵凯	010-51665282	010-59283480	ir@le.com	赵凯	911100007693890511	报告期内公司无收购及出售资产、吸收合并事项	116.4942508277	39.9348948993	116.3347809877	39.9564401178	梁军	提供网络视频服务及视频平台增值服务。	1856015158	互联网信息服务(含发布网络广告);第二类增值电信业务中的信息服务业务(不含固定网电话信息服务和互联网信息服务);制作、发行动画片、专题、电视综艺,不得制作时政新闻及同类专题、专栏等广播电视节目(广播电视节目及电视剧制作许可证有效期至2017年12月28日);计算机软、硬件的开发;计算机系统服务;销售计算机软、硬件及辅助设备、服装、鞋帽、皮革制品、针纺织品、日用品、玩具、文化用品、体育用品、家用电器、珠宝首饰、小轿车、汽车配件;从事互联网文化活动。(从事互联网文化活动以及依法须经批准的项目,经相关部门批准后依批准的内容开展经营活动。)	tzzgx@letv.com		www.le.com	CNE100000SJ8
103353	300104	乐视网	2016-12-31	乐视网信息技术(北京)股份有限公司	互联网和相关服务	I64	北京市海淀区学院南路68号19号楼六层6184号房间	北京市朝阳区姚家园路105号院3号楼乐视大厦16层	2004-11-10	2010-08-12	北京市	北京市	100025	赵凯	010-51665282	010-59283480	ir@le.com	刘文娟	911100007693890511	报告期内公司无收购及出售资产、吸收合并事项	116.3339009877	39.9571881178	116.3347809877	39.9564401178	贾跃亭	提供网络视频服务及视频平台增值服务。	1981680127	互联网信息服务(含发布网络广告);第二类增值电信业务中的信息服务业务(不含固定网电话信息服务和互联网信息服务);制作、发行动画片、专题、电视综艺,不得制作时政新闻及同类专题、专栏等广播电视节目(广播电视节目及电视剧制作许可证有效期至2017年12月28日);计算机软、硬件的开发;计算机系统服务;销售计算机软、硬件及辅助设备、服装、鞋帽、皮革制品、针纺织品、日用品、玩具、文化用品、体育用品、家用电器、珠宝首饰、小轿车、汽车配件;从事互联网文化活动。(从事互联网文化活动以及依法须经批准的项目,经相关部门批准后依批准的内容开展经营活动。)	tzzgx@letv.com		www.le.com	CNE100000SJ8
103033	300122	智飞生物	2017-12-31	重庆智飞生物制品股份有限公司	医药制造业	C27	重庆市江北区金源路7号25-1至25-8	重庆市江北区金源路7号25层	1995-07-20	2010-09-28	重庆市	重庆市	400020	秦菲	023-86358226	023-86358685	IRM@zhifeishengwu.com	秦菲(兼)	91500000203049808L	报告期内公司无收购及出售资产、吸收合并事项	106.5281590247	29.5622276867	106.5279240247	29.5590746867	蒋仁生	疫苗、生物制品的研发、生产和销售。	1600000000	批发生物制品(除疫苗);境外疫苗代理进口及销售;生物技术研究、开发及技术咨询服务;货物及技术进出口;仓储服务(不含危险品);生物制品市场推广宣传服务;普通货运、货物专用运输(冷藏保鲜);国内货物运输代理。(依法须经批准的项目,经相关部门批准后方可开展经营活动)	office2@zhifeishengwu.com		www.zhifeishengwu.com	CNE100000V20
103033	300122	智飞生物	2018-12-31	重庆智飞生物制品股份有限公司	医药制造业	C27	重庆市江北区金源路7号25-1至25-8	重庆市江北区金源路7号25层	1995-07-20	2010-09-28	重庆市	重庆市	400020	秦菲	023-86358226	023-86358685	IRM@zhifeishengwu.com	李春生	91500000203049808L	报告期内公司无收购及出售资产、吸收合并事项	106.5279240247	29.5590746867	106.5279240247	29.5590746867	蒋仁生	疫苗、生物制品的研发、生产和销售。	1600000000	批发生物制品(除疫苗);境外疫苗代理进口及销售;生物技术研究、开发及技术咨询服务;货物及技术进出口;仓储服务(不含危险品);生物制品市场推广宣传服务;普通货运、货物专用运输(冷藏保鲜);国内货物运输代理。(依法须经批准的项目,经相关部门批准后方可开展经营活动)	office2@zhifeishengwu.com		www.zhifeishengwu.com	CNE100000V20
103008	300124	汇川技术	2015-12-31	深圳市汇川技术股份有限公司	电气机械及器材制造业	C38	广东省深圳市龙华新区观澜街道高新技术产业园汇川技术总部基地	广东省深圳市宝安区新安街道留仙二路鸿威工业园E栋厂房1、2、3、4、5楼	2003-04-10	2010-09-28	广东省	深圳市	518101	宋君恩	0755-83185787	0755-83185659	songjunen@inovance.cn	吴妮妮	914403007488656882	报告期内公司无收购及出售资产、吸收合并事项	113.9211848527	22.5796214387	114.0428505662	22.6700930227	朱兴明	工业自动化控制产品的研发、生产和销售	795251630	工业自动化产品（包括变频器、伺服系统、控制器、高效节能电机、人机界面）、新能源产品（包括光伏逆变器、储能电站变流器、智能微电网）、新能源汽车（包括新能源汽车电机控制器）、物联网产品、机电产品、自动化装备和各种软件的研发、设计、系统集成、生产、销售和技术服务（以上不含限制项目）；经营进出口业务（法律、行政法规、国务院决定禁止的项目除外，限制的项目须取得许可后方可经营）。	dongmiban@inovance.cn,ir@inovance.cn		www.inovance.cn	CNE100000V46
103008	300124	汇川技术	2016-12-31	深圳市汇川技术股份有限公司	电气机械及器材制造业	C38	广东省深圳市龙华新区观澜街道高新技术产业园汇川技术总部大厦	广东省深圳市宝安区新安街道留仙二路鸿威工业园E栋厂房1、2、3、4、5楼	2003-04-10	2010-09-28	广东省	深圳市	518101	宋君恩	0755-83185787	0755-83185659	songjunen@inovance.cn	吴妮妮	914403007488656882	报告期内公司无收购及出售资产、吸收合并事项	113.9211848527	22.5796214387	114.0428505662	22.6700930227	朱兴明	工业自动化控制产品的研发、生产和销售	1659882841	工业自动化产品(包括变频器、伺服系统、控制器、高效节能电机、人机界面)、新能源产品(包括光伏逆变器、储能电站变流器、智能微电网)、新能源汽车(包括新能源汽车电机控制器)、物联网产品、机电产品、自动化装备和各种软件的研发、设计、系统集成、生产、销售和技术服务(以上不含限制项目);经营进出口业务(法律、行政法规、国务院决定禁止的项目除外,限制的项目须取得许可后方可经营)。	dongmiban@inovance.cn,ir@inovance.cn		www.inovance.cn	CNE100000V46
103008	300124	汇川技术	2017-12-31	深圳市汇川技术股份有限公司	电气机械及器材制造业	C38	广东省深圳市龙华新区观澜街道高新技术产业园汇川技术总部大厦	广东省深圳市宝安区新安街道留仙二路鸿威工业园E栋厂房1、2、3、4、5楼	2003-04-10	2010-09-28	广东省	深圳市	518101	宋君恩	0755-83185787	0755-83185659	songjunen@inovance.com	吴妮妮	914403007488656882	报告期内公司无收购及出售资产、吸收合并事项	113.9211848527	22.5796214387	114.0428505662	22.6700930227	朱兴明	工业自动化控制产品的研发、生产和销售	1664124710	工业自动化产品(包括变频器、伺服系统、控制器、高效节能电机、人机界面)、新能源产品(包括光伏逆变器、储能电站变流器、智能微电网)、新能源汽车(包括新能源汽车电机控制器)、物联网产品、机电产品、自动化装备和各种软件的研发、设计、系统集成、生产、销售和技术服务(以上不含限制项目);房屋租赁;经营进出口业务(法律、行政法规、国务院决定禁止的项目除外,限制的项目须取得许可后方可经营)。	ir@inovance.com		www.inovance.com	CNE100000V46
103008	300124	汇川技术	2018-12-31	深圳市汇川技术股份有限公司	电气机械及器材制造业	C38	广东省深圳市龙华新区观澜街道高新技术产业园汇川技术总部大厦	广东省深圳市宝安区新安街道留仙二路鸿威工业园E栋厂房1、2、3、4、5楼	2003-04-10	2010-09-28	广东省	深圳市	518101	宋君恩	0755-83185787	0755-83185659	songjunen@inovance.com	吴妮妮;李艳昌	914403007488656882	报告期内公司无收购及出售资产、吸收合并事项	113.9211848527	22.5796214387	114.0428505662	22.6700930227	朱兴明	工业自动化控制产品的研发、生产和销售	1662219710	工业自动化产品(包括变频器、伺服系统、控制器、高效节能电机、人机界面)、新能源产品(包括光伏逆变器、储能电站变流器、智能微电网)、新能源汽车(包括新能源汽车电机控制器)、物联网产品、机电产品、自动化装备和各种软件的研发、设计、系统集成、生产、销售和技术服务(以上不含限制项目);房屋租赁;经营进出口业务(法律、行政法规、国务院决定禁止的项目除外,限制的项目须取得许可后方可经营)。	ir@inovance.com		www.inovance.com	CNE100000V46
102893	300133	华策影视	2015-12-31	浙江华策影视股份有限公司	广播、电视、电影和影视录音制作业	R86	浙江省杭州市西湖区文二西路683号西溪创意产业园C-C座	浙江省杭州市西湖区文二西路683号西溪创意产业园C-C座	2005-10-25	2010-10-26	浙江省	杭州市	310012	王丛	0571-87553075	0571-81061286	zqsw@huacemedia.com	周能传	913300007792873744	报告期内公司无收购及出售资产、吸收合并事项	120.081593873	30.2807487144	120.076149873	30.2792777144	傅梅城	影视剧的制作、发行及衍生业务	1091640951	许可经营项目：制作、复制、发行：专题、专栏、综艺、动画片、广播剧、电视剧；一 般经营项目：设计、制作、代理国内广告，经济信息咨询（除证券、期货），承办会务、礼仪服务，经营进出口业务。	zqsw@huacemedia.com		www.huacemedia.com	CNE100000VX3
102893	300133	华策影视	2016-12-31	浙江华策影视股份有限公司	广播、电视、电影和影视录音制作业	R86	浙江省杭州市文二西路683号西溪创意产业园C-C座	浙江省杭州市文二西路683号西溪创意产业园C-B座、C-C座	2005-10-25	2010-10-26	浙江省	杭州市	310012	高远	0571-87553075	0571-81061286	zqsw@huacemedia.com	周能传	913300007792873744	出售重大股权情况:交易对方:万达影视传媒有限公司;大连天神娱乐股份有限公司;杜昉;被出售股权:青岛万达影视投资有限公司0.61%的股权;北京合润德堂文化传媒股份有限公司20%的股权;华策天映文化传媒(天津)有限公司10%的股权;出售日:-;-;-;交易价格(万元):8,463.48;15,400;750;本期初起至出售日该股权为上市公司贡献的净利润(万元):0;-;-;出售对公司的影响:无;本次交易将给公司带来投资收益;有效激励核心管理人员;股权出售为上市公司贡献的净利润占净利润总额的比例:0.00%;-;0.00%;股权出售定价原则:市场公允竞价;市场公允竞价;取得股权价格;是否为关联交易:否;否;是;与交易对方的关联关系:无关联关系;无关联关系;交易对方为公司副总裁;所涉及的股权是否已全部过户:是;否(2017年4月18日完成交付);否;是否按计划如期实施,如未按计划实施,应当说明原…	120.081593873	30.2807487144	120.076149873	30.2792777144	傅梅城	影视剧的制作、发行及衍生业务	1746625521	影视剧制作、发行及衍生业务。产品和提供的劳务主要有:制作、复制、发行:专题、专栏、综艺、动画片、广播剧、电视剧;设计、制作、代理国内广告,经济信息咨询(除证券、期货),承办会务、礼仪服务,经营进出口业务。	zqsw@huacemedia.com		www.huacemedia.com	CNE100000VX3
103177	300136	信维通信	2017-12-31	深圳市信维通信股份有限公司	计算机、通信和其他电子设备制造业	C39	广东省深圳市宝安区沙井街道西环路1013号A.B栋	广东省深圳市宝安区沙井街道西环路1013号A.B栋	2006-04-27	2010-11-05	广东省	深圳市	518104	杜敏	0755-36615880-8811	0755-86561715	ir@sz-sunway.com	卢信	914403007883357614	报告期内公司无收购及出售资产、吸收合并事项	113.7991818236	22.7174746636	113.7971258236	22.7153896636	彭浩	研发、生产和销售移动终端天线系统产品并提供相关技术服务。	982834638	移动终端天线、3G终端天线、模组天线、3D精密成型天线、高性能天线连接器、音频模组的设计、技术开发、生产和销售;国内商业、物资供销业,货物及技术进出口。(以上项目均不含法律、行政法规、国务院决定规定需前置审批及禁止项目)。	ir@sz-sunway.com		www.sz-sunway.com.cn	CNE100000W94
103177	300136	信维通信	2018-12-31	深圳市信维通信股份有限公司	计算机、通信和其他电子设备制造业	C39	广东省深圳市宝安区沙井街道西环路1013号A.B栋	广东省深圳市宝安区沙井街道西环路1013号A.B栋	2006-04-27	2010-11-05	广东省	深圳市	518104	杜敏	0755-36869688-8811	0755-86561715	ir@sz-sunway.com	卢信	914403007883357614	报告期内公司无收购及出售资产、吸收合并事项	113.7971258236	22.7153896636	113.7971258236	22.7153896636	彭浩	研发、生产和销售移动终端天线系统产品并提供相关技术服务。	975595304	移动终端天线、3G终端天线、模组天线、3D精密成型天线、高性能天线连接器、音频模组的设计、技术开发、生产和销售;国内商业、物资供销业,货物及技术进出口。(以上项目均不含法律、行政法规、国务院决定规定需前置审批及禁止项目)。	ir@sz-sunway.com		www.sz-sunway.com.cn	CNE100000W94
103115	300142	沃森生物	2018-12-31	云南沃森生物技术股份有限公司	医药制造业	C27	云南省昆明市高新开发区北区云南大学科技园2期A3幢4楼	云南省昆明市高新区科园路99号鼎易天城9栋A座19楼	2001-01-16	2010-11-12	云南省	昆明市	650106	张荔	0871-68312779	0871-68312779	ir@walvax.com	杨永祥	91530000719480244Y	出售重大股权情况:交易对方:浙江康恩贝制药股份有限公司;HH CT Holdings Limited;被出售股权:嘉和生物8.6455%股权;嘉和生物37.8%股权;出售日:2018年06月20日;2018年07月16日;交易价格(万元):30,000;131,166;本期初起至出售日该股权为上市公司贡献的净利润(万元):22,637.91;91,780.53;出售对公司的影响:-;本次股权转让完成后,嘉和生物将不再是公司的控股子公司,不再纳入公司合并财务报表范围;股权出售为上市公司贡献的净利润占净利润总额的比例:19.35%;80.01%;股权出售定价原则:经交易双方协商确定;以评估结果为基础,经交易双方协商确定;是否为关联交易:否;否;与交易对方的关联关系:无;无;所涉及的股权是否已全部过户:是;是;是否按计划如期实施,如未按计划实施,应当说明原因及公司已采取的措施:是;是;披露日期…	102.6574126168	25.0700893754	102.7811108082	24.981319618	李云春	疫苗产品的研发、生产、销售	1537436984	人用疫苗等生物技术药集研发、生产、销售	ir@walvax.com		www.walvax.com	CNE100000WN2
102924	300144	宋城演艺	2015-12-31	宋城演艺发展股份有限公司	文化艺术业	R87	浙江省杭州市之江路148号	浙江省杭州市之江路148号	2000-12-28	2010-12-09	浙江省	杭州市	310008	董昕	0571-87091255	0571-87091233	dx@chinascyy.com	侯丽		报告期内公司无收购及出售资产、吸收合并事项	120.0984905941	30.1704352894	120.0982235941	30.1717072894	张娴	主题公园和旅游文化演艺的投资、开发和经营	1452680502	歌舞表演、杂技表演、戏曲表演、音乐表演、综合文艺表演（凭《营业性演出许可证》经营）， 经营演出及经纪业务（凭《营业性演出许可证》经营），餐饮服务（范围详见《餐饮服务许可证》），停 车服务。旅游服务，主题公园开发经营，文化活动策划、组织，文化传播策划，动漫设计，会展组织，休 闲产业投资开发，实业投资，旅游电子商务、设计、制作、代理、发布国内各类广告、影视项目的投资管 理，旅游用品及工艺美术品（不含金饰品）、百货、土特产品（不含食品）的销售；含下属分支机构的经 营范围。（依法须经批准的项目，经相关部分批准后方可开展经营活动）	zqb@chinascgf.com		www.chinascyy.com	CNE100000XG4
102924	300144	宋城演艺	2016-12-31	宋城演艺发展股份有限公司	文化艺术业	R87	浙江省杭州市之江路148号	浙江省杭州市之江路148号	2000-12-28	2010-12-09	浙江省	杭州市	310008	陈胜敏	0571-87091255	0571-87091233	shengmin.chen@songcn.com	侯丽	91330000143102311G	报告期内公司无收购及出售资产、吸收合并事项	120.0984905941	30.1704352894	120.0982235941	30.1717072894	张娴	主题公园和旅游文化演艺的投资、开发和经营	1452613577	歌舞表演、杂技表演、戏曲表演、音乐表演、综合文艺表演(凭《营业性演出许可证》经营),经营演出及经纪业务(凭《营业性演出许可证》经营),餐饮服务(范围详见《餐饮服务许可证》),停车服务。旅游服务,主题公园开发经营,文化活动策划、组织,文化传播策划,动漫设计,会展组织,休闲产业投资开发,实业投资,旅游电子商务、设计、制作、代理、发布国内各类广告、影视项目的投资管理,旅游用品及工艺美术品(不含金饰品)、百货、土特产品(不含食品)的销售;含下属分支机构的经营范围。(依法须经批准的项目,经相关部分批准后方可开展经营活动)	zqb@chinascgf.com		www.chinascyy.com	CNE100000XG4
102924	300144	宋城演艺	2017-12-31	宋城演艺发展股份有限公司	文化艺术业	R87	浙江省杭州市之江路148号	浙江省杭州市之江路148号	2000-12-28	2010-12-09	浙江省	杭州市	310008	陈胜敏	0571-87091255	0571-87091233	shengmin.chen@songcn.com	侯丽	91330000143102311G	报告期内公司无收购及出售资产、吸收合并事项	120.0984905941	30.1704352894	120.0982235941	30.1717072894	张娴	主题公园和旅游文化演艺的投资、开发和经营	1452607800	歌舞表演、杂技表演、戏曲表演、音乐表演、综合文艺表演(凭《营业性演出许可证》经营),经营演出及经纪业务(凭《营业性演出许可证》经营),餐饮服务(范围详见《餐饮服务许可证》),停车服务。旅游服务,主题公园开发经营,文化活动策划、组织,文化传播策划,动漫设计,会展组织,休闲产业投资开发,实业投资,旅游电子商务,设计、制作、代理、发布国内各类广告,影视项目的投资管理,旅游用品及工艺美术品(不含金饰品)、百货、土特产品(不含食品)的销售;含下属分支机构的经营范围。	zqb@chinascgf.com		www.chinascyy.com	CNE100000XG4
102924	300144	宋城演艺	2018-12-31	宋城演艺发展股份有限公司	文化艺术业	R87	浙江省杭州市之江路148号	浙江省杭州市之江路148号	2000-12-28	2010-12-09	浙江省	杭州市	310008	陈胜敏	0571-87091255	0571-87091233	shengmin.chen@songcn.com	侯丽	91330000143102311G	报告期内公司无收购及出售资产、吸收合并事项	120.0984905941	30.1704352894	120.0982235941	30.1717072894	张娴	主题公园和旅游文化演艺的投资、开发和经营	1452607800	歌舞表演、杂技表演、戏曲表演、音乐表演、综合文艺表演(凭《营业性演出许可证》经营),经营演出及经纪业务(凭《营业性演出许可证》经营),餐饮服务(范围详见《餐饮服务许可证》),停车服务。旅游服务,主题公园开发经营,文化活动策划、组织,文化传播策划,动漫设计,会展组织,休闲产业投资开发,实业投资,旅游电子商务,设计、制作、代理、发布国内各类广告,影视项目的投资管理,旅游用品及工艺美术品(不含金饰品)、百货、土特产品(不含食品)的销售;出版物批发、零售(凭许可证经营);含下属分支机构的经营范围。(依法须经批准的项目,经相关部门批准后方可开展经营活动)。	zqb@chinascgf.com		www.chinascyy.com	CNE100000XG4
102926	300146	汤臣倍健	2015-12-31	汤臣倍健股份有限公司	食品制造业	C14	广东省珠海市金湾区三灶科技工业园星汉路19号	广东省广州市萝岗区科学城科学大道中99号科汇金谷3街3号	2005-04-01	2010-12-15	广东省	珠海市	510663	胡超	020-28956667	020-28957910	huc@by-health.com	唐金银		报告期内公司无收购及出售资产、吸收合并事项	113.4353085273	23.166006054	113.3288462571	22.0391747023	林志成	膳食营养补充剂的研发、生产和销售。	728010940	保健食品生产销售（颗粒剂、片剂、胶囊剂（含益生菌）、软胶囊剂、粉剂（含益生菌）(许可证有效期至2019年6月3日)；研发、生产和销售饮料（固体饮料类）(许可证有效期至2016年8月24日)；研发、生产和销售糖果制品（糖果）(许可证有效期至2016年8月25日)；批发兼零售：预包装食品、乳制品（不含婴幼儿配方乳粉）(许可证有效期至2018年10月29日)；研发和销售包装材料；研发生物技术；商务服务（不含许可经营项目）；中药材种植（不含许可经营项目）。	huc@by-health.com		www.by-health.com	CNE100000Y84
105120	300168	万达信息	2016-12-31	万达信息股份有限公司	软件和信息技术服务业	I65	上海市桂平路481号20号楼5层	上海市联航路1518号	1995-11-09	2011-01-25	上海市	上海市	201112	张令庆	15921621686	021-32140588	invest@wondersgroup.com	王雯钰	91310000132653687M	报告期内公司无收购及出售资产、吸收合并事项	121.5193769474	31.0772950627	121.4024440316	31.1681565574	史一兵	以公共事务为核心的城市信息化领域的软件开发与服务。	1031082642	计算机专业领域内的技术咨询、开发、转让、培训、承包、中介、入股及新产品的研制、试销,计算机及配件,普通机械及电器机械与器材,经济信息咨询服务,机械电器设备租赁,电子产品及通信设备销售,计算机信息系统集成,建筑智能化系统集成,(设计、施工),机场空管工程及航站楼弱电系统工程,II、III类医疗器械经营(详见医疗器械经营企业许可证),自营进出口。【依法须经批准的项目,经相关部门批准后方可开展经营活动】	invest@wondersgroup.com		www.wondersgroup.com	CNE100000ZD6
105105	300251	光线传媒	2015-12-31	北京光线传媒股份有限公司	广播、电视、电影和影视录音制作业	R86	北京市东城区和平里东街11号37号楼11105号	北京市东城区和平里东街11号院内3号楼3层	2000-04-24	2011-08-03	北京市	北京市	100013	侯俊	010-64516451	010-64516404	ir@ewang.com	王丽娟	91110000722604869A	出售重大股权情况 ： 交易对方:大连天神娱乐股份有限公司；上海光线投资控股有限公司； 被出售股权:北京妙趣横生科技有限公司；北京先看网络科技有限公司； 出售日:2015年10月13日；2015年12月18日； 交易价格（万元）:16,002.2；4,729.41； 本期初起至出售日该股权为上市公司贡献的净利润（万元）:590.01；-586.87； 出售对公司的影响:出售事项未对公司业务连续性、管理层稳定造成影响，对报告期财务状况和经营成果无实质性影响；出售事项未对公司业务连续性、管理层稳定造成影响，对报告期财务状况和经营成果无实质性影响； 股权出售为上市公司贡献的净利润占净利润总额的比例:--；1.45%； 股权出售定价原则:为科冕木业定价基准日前20个交易日股票交易的均价53.13元；根据北京先看网络科技有限公司截至评估基准日2015年 9月30日的全部权益价值为11,823.53万…	116.4247511626	39.951359023	116.4242611626	39.952409023	王长田	电视节目和影视剧的投资制作和发行业务。	1466804217	广播电视节目的制作、发行；经营演出及经纪业务；设计、制作、代理、发布国内及外商来华广告；信息咨询（除中介除外）；承办展览展示；组织文化艺术交流活动；技术开发、技术服务；动画片（制作需另行申报）；游戏产品。	ir@ewang.com		www.ewang.com	CNE100001617
105105	300251	光线传媒	2016-12-31	北京光线传媒股份有限公司	广播、电视、电影和影视录音制作业	R86	北京市东城区和平里东街11号37号楼11105号	北京市东城区和平里东街11号院3号楼3层	2000-04-24	2011-08-03	北京市	北京市	100013	侯俊	010-64516451	010-84222188	ir@ewang.com		91110000722604869A	出售重大股权情况:交易对方:广州海汇投资管理有限公司、深圳前海润策文化创意合伙企业(有限合伙)、广州市弧品企业管理咨询合伙企业(有限合伙);被出售股权:广州蓝弧文化传播有限公司;出售日:2016年12月12日;交易价格(万元):24,384;本期初起至出售日该股权为上市公司贡献的净利润(万元):1,037.35;出售对公司的影响:本次交易有利于资产结构的进一步优化,可提高公司资产流动性,优化公司的整体资源配置,提高资金使用效率,符合公司的投资策略及策略及发展战发展战略。本略。本次交易次交易完成后,公后,公司财务司财务报表合报表合并范围并范围将发生将发生变化,变化,蓝弧文蓝弧文化不再化不再属于公属于公司合并司合并报表范报表范围;股权出售为上市公司贡献的净利润占净利润总额的比例:0.65%;股权出售定价原则:市场价格;是否为关联交易:否;与交易对方的关联关系:非关联方;所涉及的股权是否已全部…	116.4247511626	39.951359023	116.4242611626	39.952409023	王长田	电视节目和影视剧的投资制作和发行业务。	2933608432	广播电视节目的制作、发行;经营演出及经纪业务;设计、制作、代理、发布国内及外商来华广告;信息咨询(除中介除外);承办展览展示;组织文化艺术交流活动;技术开发、技术服务;动画片(制作需另行申报);游戏产品;视频直播业务。	ir@ewang.com		www.ewang.com	CNE100001617
105105	300251	光线传媒	2017-12-31	北京光线传媒股份有限公司	广播、电视、电影和影视录音制作业	R86	北京市东城区和平里东街11号37号楼11105号	北京市东城区和平里东街11号院3号楼3层	2000-04-24	2011-08-03	北京市	北京市	100013	侯俊	010-64516451	010-84222188	ir@ewang.com		91110000722604869A	出售重大股权情况:交易对方:天津猫眼文化传媒有限公司;被出售股权:北京捷通无限科技有限公司68.55%的股权;出售日:2017年06月26日;交易价格(万元):13,073;本期初起至出售日该股权为上市公司贡献的净利润(万元):-394.83;出售对公司的影响:本次交易有利于资产结构的进一步优化,可提高公司资产流动性,优化公司的整体资源配置,提高资金使用效率,符合公司的投资策略及发展战略。本次交易完成后,公司财务报表合并范围将发生变化,捷通无限不再属于公司合并报表范围;股权出售为上市公司贡献的净利润占净利润总额的比例:3.45%;股权出售定价原则:市场价格;是否为关联交易:是;与交易对方的关联关系:关联方;所涉及的股权是否已全部过户:是;是否按计划如期实施,如未按计划实施,应当说明原因及公司已采取的措施:是;披露日期:2017年05月31日;披露索引:巨潮资讯网	116.4247511626	39.951359023	116.4242611626	39.952409023	王长田	电视节目和影视剧的投资制作和发行业务。	2933608432	广播电视节目的制作、发行;经营演出及经纪业务;设计、制作、代理、发布国内及外商来华广告;影视策划;信息咨询(除中介除外);承办展览展示;组织文化艺术交流活动;技术开发、技术服务;电影发行;电影摄制;电影放映;企业营销策划;接受委托代售门票;形象策划;形象包装;动画片(制作需另行申报);游戏产品;计算机软硬件;软件开发与设计;网络系统集成;经营性互联网文化服务(凭有效许可证件经营);软件销售(除电子出版物);文化艺术交流活动策划;票务代理相关的技术服务及票务代理。本公司及子公司主要产品及业务是影视剧的投资制作与发行业务;电视栏目的制作与发行业务;艺人经纪业务;广告业务;游戏产品的制作与发行业务;互联网视频直播业务;影票服务代理业务。	ir@ewang.com		www.ewang.com	CNE100001617
105105	300251	光线传媒	2018-12-31	北京光线传媒股份有限公司	广播、电视、电影和影视录音制作业	R86	北京市东城区和平里东街11号37号楼11105号	北京市东城区和平里东街11号院3号楼3层	2000-04-24	2011-08-03	北京市	北京市	100013	侯俊	010-64516451	010-84222188	ir@ewang.com	徐楠楠	91110000722604869A	出售重大股权情况:交易对方:林芝腾讯;被出售股权:新丽传媒27.6420%的股权;出售日:2018年03月10日;交易价格(万元):331704;本期初起至出售日该股权为上市公司贡献的净利润(万元):0;出售对公司的影响:本次交易完成后,公司能够全额回收初始投资成本并取得很好的投资收益,增加公司现金流,对公司当期业绩产生了积极影响;股权出售为上市公司贡献的净利润占净利润总额的比例:120.50%;股权出售定价原则:市场定价;是否为关联交易:否;与交易对方的关联关系:非关联方;所涉及的股权是否已全部过户:是;是否按计划如期实施,如未按计划实施,应当说明原因及公司已采取的措施:是;披露日期:2018年03月12日;披露索引:巨潮资讯网	116.4228411626	39.951527023	116.4242611626	39.952409023	王长田	电视节目和影视剧的投资制作和发行业务。	2933608432	广播电视节目的制作、发行;经营演出及经纪业务;设计、制作、代理、发布国内及外商来华广告;信息咨询(除中介除外);承办展览展示;组织文化艺术交流活动;技术开发、技术服务。广播电视节目的制作、发行;经营演出及经纪业务。(企业依法自主选择经营项目,开展经营活动;依法须经批准的项目,经相关部门批准后依批准的内容开展经营活动;不得从事本市产业政策禁止和限制类项目的经营活动。)	ir@ewang.com		www.ewang.com	CNE100001617
107519	300296	利亚德	2018-12-31	利亚德光电股份有限公司	计算机、通信和其他电子设备制造业	C39	北京市海淀区颐和园北正红旗西街9号	北京市海淀区颐和园北正红旗西街9号	1995-08-21	2012-03-15	北京市	北京市	100091	李楠楠	010-62864532	010-62877624	leyard2010@leyard.com	张小丽	91110000600039822G	报告期内公司无收购及出售资产、吸收合并事项	116.2690787847	40.010003517	116.2673267847	40.008378517	李军	专业从事LED应用产品研发、设计、生产、销售和服务，致力于为客户提供高效、节能、可靠的LED应用产品及其整体解决方案	2542876576	电子显示产品、照明产品、电子标识产品的生产和销售。	leyard2010@leyard.com		www.leyard.com	CNE100001CB7
107632	300315	掌趣科技	2015-12-31	北京掌趣科技股份有限公司	软件和信息技术服务业	I65	北京市海淀区马甸东路17号8层916	北京市海淀区马甸东路17号8层916	2004-08-02	2012-05-11	北京市	北京市	100192	李好胜	010-65073699	010-65073699	ir@ourpalm.com	王娉	91110000765511822T	报告期内公司无收购及出售资产、吸收合并事项	116.3784217361	39.9716143739	116.3786117361	39.9711353739	邓攀	游戏的开发、发行与运营，主要包括移动终端游戏、互联网页面游戏及其周边产品的产品开发、发行推广和运营维护等。	2658377439	第二类增值电信业务中的信息服务业务（不含固定网电话信息服务和互联网信息服务）；因特网信息服 务业务（除新闻、教育、医疗保健、药品、医疗器械以外的内容）；利用互联网经营游戏产品；互联网游戏出版、手机游戏 出版。技术推广；销售计算机、软件及辅助设备；货物进出口、技术进出口、代理进出口；设计、制作、代理、发布广告。	ir@ourpalm.com		www.ourpalm.com	CNE100001DH2
107632	300315	掌趣科技	2016-12-31	北京掌趣科技股份有限公司	互联网和相关服务	I64	北京市海淀区奥北产业基地29号楼(北楼)9层901室	北京市海淀区宝盛南路1号奥北科技园领智中心C座	2004-08-02	2012-05-11	北京市	北京市	100192	李好胜	010-65073699	010-65073699	ir@ourpalm.com	王娉	91110000765511822T	报告期内公司无收购及出售资产、吸收合并事项	116.3766365349	40.0324894718	116.3770205349	40.0331364718	邓攀	游戏的开发、发行与运营，主要包括移动终端游戏、互联网页面游戏及其周边产品的产品开发、发行推广和运营维护等。	2770874854	第二类增值电信业务中的信息服务业务(不含固定网电话信息服务和互联网信息服务);因特网信息服务业务(除新闻、教育、医疗保健、药品、医疗器械以外的内容);利用互联网经营游戏产品;互联网游戏出版、手机游戏出版;技术推广;销售计算机、软件及辅助设备;货物进出口、技术进出口、代理进出口;设计、制作、代理、发布广告;出租办公用房。	ir@ourpalm.com		www.ourpalm.com	CNE100001DH2
10133834	300408	三环集团	2018-12-31	潮州三环(集团)股份有限公司	计算机、通信和其他电子设备制造业	C39	广东省潮州市凤塘三环工业城内综合楼	广东省潮州市凤塘三环工业城内综合楼	1992-12-10	2014-12-03	广东省	潮州市	515646	徐瑞英	0768-6850192	0768-6850193	dsh@cctc.cc	吴晓淳	91445100282274017L	报告期内公司无收购及出售资产、吸收合并事项	116.5633140507	23.6303788375	116.5628030507	23.6300858375	张万镇	公司主要从事电子陶瓷类电子元件及其基础材料的生产和销售,主要产品包括光纤陶瓷插芯及套筒、燃料电池隔膜板、陶瓷封装基座、陶瓷基片、陶瓷基体、接线端子、MLCC和电阻等几大类,产品主要应用于电子、通信、消费类电子产品、工业用电子设备和新能源等领域。	1743418022	电子陶瓷类电子元件及其新材料的生产和销售,主要产品包括通信部件、半导体部件、电子元件及材料、压缩机部件等几大类,公司产品主要应用于电子、通信、消费类电子产品、工业用电子设备和新能源等领域。经营范围为:研究、开发、生产、销售各类型电子元器件;光电子器件及其他电子器件;特种陶瓷制品;电子工业专用设备;电子材料;家用电器;高新技术转让、咨询服务。货物进出口,技术进出口(法律、行政法规禁止的除外;法律、行政法规限制的项目须取得许可后经营)。	dsh@cctc.cc		www.cctc.cc	CNE100001Y42
10101926	300433	蓝思科技	2018-12-31	蓝思科技股份有限公司	计算机、通信和其他电子设备制造业	C39	湖南省浏阳市生物医药园	湖南省浏阳市生物医药园	2006-12-21	2015-03-18	湖南省	浏阳市	410311	彭孟武	0731-83285699	0731-83285010	lsgf@hnlens.com	张少伟;周天舒	91430000796852865Y	报告期内公司无收购及出售资产、吸收合并事项	113.3784812166	28.2151771727	113.3784812166	28.2151771727	周群飞	视窗防护玻璃的研发、生产和销售。	3926797538	消费电子产品功能视窗及外观防护零部件研发、制造为主,主要产品是防护玻璃以及蓝宝石、陶瓷、金属等材质的外观防护零部件等。	lsgf@hnlens.com		www.hnlens.com	CNE100001YW7
105113	600000	浦发银行	2015-12-31	上海浦东发展银行股份有限公司	货币金融服务	J66	上海市中山东一路12号	上海市中山东一路12号	1992-10-19	1999-11-10	上海市	上海市	200002	穆矢	021-63611226	021-63230807	mushi@spdb.com.cn	杨国平;吴蓉	9131000013221158XC	报告期内公司无收购及出售资产、吸收合并事项	121.4906781891	31.2362158123	121.4902541891	31.2365138123	高国富	金融与信托投资业务。	18653471415	经中国人民银行及中国银行业监督管理委员会(以下简称“银监会”)批准的商业银行业务 及融资租赁业务。	bdo@spdb.com.cn		www.spdb.com.cn	CNE0000011B7
105113	600000	浦发银行	2016-12-31	上海浦东发展银行股份有限公司	货币金融服务	J66	上海市中山东一路12号	上海市中山东一路12号	1992-10-19	1999-11-10	上海市	上海市	200002	穆矢	021-63611226	021-63230807	mushi@spdb.com.cn	杨国平;吴蓉	9131000013221158XC	报告期内公司无收购及出售资产、吸收合并事项	121.4906781891	31.2362158123	121.4902541891	31.2365138123	吉晓辉	金融与信托投资业务。	21618000000	经中国人民银行及中国银行业监督管理委员会(以下简称"银监会")批准的商业银行业务,融资租赁业务和信托业务以及经香港证监会颁发的第4类(就证券提供意见)、第6类(就机构融资提供意见)、第9类(提供资产管理)牌照规定的投资银行业务和基金管理业务。	bdo@spdb.com.cn		www.spdb.com.cn	CNE0000011B7
105113	600000	浦发银行	2017-12-31	上海浦东发展银行股份有限公司	货币金融服务	J66	上海市中山东一路12号	上海市中山东一路12号	1992-10-19	1999-11-10	上海市	上海市	200002	谢伟	021-63611226	021-63230807	xiew2@spdb.com.cn	杨国平;吴蓉	9131000013221158XC	报告期内公司无收购及出售资产、吸收合并事项	121.4906781891	31.2362158123	121.4902541891	31.2365138123	高国富	金融与信托投资业务。	29352000000	经中国人民银行及中国银行业监督管理委员会(以下简称“银监会”)批准的商业银行业务,融资租赁业务和信托业务以及经香港证监会颁发的第4类(就证券提供意见)、第6类(就机构融资提供意见)、第9类(提供资产管理)牌照规定的投资银行业务和基金管理业务。	bdo@spdb.com.cn		www.spdb.com.cn	CNE0000011B7
105113	600000	浦发银行	2018-12-31	上海浦东发展银行股份有限公司	货币金融服务	J66	上海市中山东一路12号	上海市中山东一路12号	1992-10-19	1999-11-10	上海市	上海市	200002	谢伟	021-63611226	021-63230807	xiew2@spdb.com.cn	杨国平;吴蓉	9131000013221158XC	报告期内公司无收购及出售资产、吸收合并事项	121.4906781891	31.2362158123	121.4902541891	31.2365138123	高国富	金融与信托投资业务。	29352000000	经中国人民银行及中国银行保险监督管理委员会(以下简称“银保监会”)批准的商业银行业务,融资租赁业务和信托业务以及经香港证监会颁发的第4类(就证券提供意见)、第6类(就机构融资提供意见)、第9类(提供资产管理)牌照规定的投资银行业务和基金管理业务。	bdo@spdb.com.cn		www.spdb.com.cn	CNE0000011B7
105017	600004	白云机场	2018-12-31	广州白云国际机场股份有限公司	航空运输业	G56	广东省广州市白云国际机场南工作区自编一号	广东省广州白云国际机场南区自编一号股份公司本部办公大楼	2000-09-19	2003-04-28	广东省	广州市	510470	戚耀明	020-36063595	020-36063416	600004@gdairport.com	董新玲	914400007250669553	报告期内公司无收购及出售资产、吸收合并事项	113.3064953013	23.3890514478	113.302875738	23.3862476868	邱嘉臣	以航空地面客货过港服务为主业，以与航空主业相关的延伸服务为辅助，形成以客货过港为主线，配合客货代理、航空配餐、场所出租、住宿餐饮、广告、商贸等业务的立体服务系统。	2069320514	旅客过港服务;与航空运输有关的地面服务、交通运输和仓储服务;航空设施使用服务;提供航空营业场所;航空器维修(凭资质证书经营);航空代理、航空保险销售代理业务;航空运输技术协作中介服务;行李封包服务;航空应急求援服务;航空信息咨询服务;航空运输业务有关的延伸服务;代办报关手续服务;场地出租;展览展示服务;销售百货;销售纺织、服装及日用品;销售文化、体育用品及器材;销售食品、饮料及烟草制品;销售家用电器及电子产品;互联网零售;污水处理。以下范围由分支机构经营:汽车和机电设备维修,汽车、摩托车安全技术检验(持交警部门委托证书经营);包车客运、班车客运、出租客运及客运站经营;饮食、住宿服务;食品加工;广告业务;国内商业(专营专控商品凭许可证经营),销售小轿车;供电、供水系统运行管理,电气、供水设备设施维修;水电计量管理;机场助航灯光设备技术咨询、检查及更新改造项目;机场专用设备、设施的安装、维修…	600004@gdairport.com		www.baiyunport.com	CNE000001DX0
105018	600005	武钢股份	2015-12-31	武汉钢铁股份有限公司	黑色金属冶炼及压延加工业	C31	湖北省武汉市青山区沿港路3号	湖北省武汉市青山区厂前武钢2号门	1997-11-07	1999-08-03	湖北省	武汉市	430083	李海涛	027-86217195	027-86217296	wiscl@wisco.com.cn	许书铭		报告期内公司无收购及出售资产、吸收合并事项	114.4076316227	30.6299350643	114.4039258382	30.6384773276	马国强	冷轧薄板、镀锌板、镀锡板、冷轧硅钢片的生产和销售 。	10093779823	冶金产品及副产品、钢铁延伸产品制造;冶金产品的技术开发;永久 气体和混和气体气瓶充装(气体品种以安全生产许可证核定的许可范围为限)、医用氧气的生产; 黑色、有色金属加工和销售;钢铁渣开采;废钢加工及收购生产性废旧金属等业务。主要产品有热轧板卷、中厚板、大型材、高速线材、棒材、冷 轧及涂镀板(含冷轧薄板、镀锌板、镀锡板、彩涂板)、冷轧硅钢(含冷轧取向硅钢片、冷轧无 取向硅钢片)等。	wiscl@wisco.com.cn		www.wisco.com.cn	CNE000000ZZ0
104845	600008	首创股份	2015-12-31	北京首创股份有限公司	水的生产和供应业	D46	北京市海淀区双榆树知春路76号	北京市朝阳区北三环东路八号静安中心三层	1999-08-31	2000-04-27	北京市	北京市	100028	郭鹏	010-64689035	010-64689030	securities@capitalwater.cn	霍道臣	91110000700231088J	重大资产和股权出售 : 公司第六届董事会2015年度第十八次临时会议审议通过了《关于公司转让北京首创爱思考投资管理有限公司股权的议案》，同意公司通过在北京产权交易所挂牌公开征集受让方的方式转让持有的北京首创爱思考投资管理有限公司50%股权，挂牌底价拟为评估后的北京首创爱思考投资管理有限公司50%股权对应的净资产价值197.93万元。	116.4408484138	39.9599561322	116.3322579921	39.9760430513	王灏	公用基础设施的投资及管理；高科技产品的技术开发等。	2410307062	公用基础设施的投资及投资管理；高科技产品的技术开发、咨询、转让、服务、培训；房地产项目开发及销售；物业管理；投资咨询；住宿、餐饮等。	master@capitalwater.cn		www.capitalwater.cn	CNE000001295
104845	600008	首创股份	2016-12-31	北京首创股份有限公司	水的生产和供应业	D46	北京市海淀区双榆树知春路76号翠宫饭店写字楼15层	北京市朝阳区北三环东路八号静安中心三层	1999-08-31	2000-04-27	北京市	北京市	100028	邵丽	010-64689035	010-64689030	securities@capitalwater.cn	高晗	91110000700231088J	重大资产和股权出售:1、公司第六届董事会2016年度第三次临时会议审议通过了《关于公司转让秦皇岛首创水务有限责任公司50%股权的议案》,同意公司通过挂牌转让的方式,转让公司持有的秦皇岛首创水务有限责任公司50%的股权,转让底价拟定为秦皇岛首创水务有限责任公司50%股权的评估值14,260.50万元,同意公司按照国有资产管理的规定履行相关手续。截至报告期末,转让已完成。2、公司第六届董事会2016年度第二十三次临时会议审议通过了《关于公司转让下属全资江苏青石置业有限公司股权的议案》,同意公司转让下属全资江苏青石置业有限公司100%股权;同意由公司下属全资子公司重庆首创环境治理有限公司按照国有资产管理的规定履行相关手续,通过北京产权交易所以挂牌公开征集受让方的方式对外转让,转让股权评估值为6,507.78万元,挂牌底价参考评估值拟定为6,600万元;同时,公司可采取法律等相关措施保证股权转让…	116.4408484138	39.9599561322	116.3323929921	39.9759900513	刘永政	公用基础设施的投资及管理；高科技产品的技术开发等。	4820614124	公用基础设施的投资及投资管理;高科技产品的技术开发、咨询、转让、服务、培训;房地产项目开发及销售;物业管理;投资咨询;住宿、餐饮等。	master@capitalwater.cn		www.capitalwater.cn	CNE000001295
104845	600008	首创股份	2017-12-31	北京首创股份有限公司	水的生产和供应业	D46	北京市海淀区双榆树知春路76号翠宫饭店写字楼15层	北京市朝阳区北三环东路八号静安中心三层	1999-08-31	2000-04-27	北京市	北京市	100028	邵丽	010-64689035	010-64689030	securities@capitalwater.cn	官念	91110000700231088J	重大资产和股权出售:公司第六届董事会2017年度第二次会议审议通过了《关于出售四川首创远大房地产开发有限公司100%股权及重庆首创环境治理有限公司100%股权的议案》,同意公司实施本次股权转让,拟转让的股权包括:公司全资子公司北京水星环境有限责任公司持有的四川首创远大房地产开发有限公司100%股权,上述拟转让股权评估值为1,989.61万元;同意公司实施本次股权转让,拟转让的股权包括:公司全资子公司北京水星环境有限责任公司持有的重庆首创环境治理有限公司100%股权,上述拟转让股权评估值为8,488.23万元。截至报告期末,水星环境有限公司将所持有的四川首创远大房地产开发有限公司100%股权及相关债权、重庆首创环境治理有限公司100%股权及相关债权通过公开挂牌方式转出。股东变更登记工作已于2018年1月2日完成。	116.4408484138	39.9599561322	116.3323929921	39.9759900513	刘永政	公用基础设施的投资及管理；高科技产品的技术开发等。	4820614124	公用基础设施的投资及投资管理;高科技产品的技术开发、咨询、转让、服务、培训;房地产项目开发及销售;物业管理;投资咨询;住宿、餐饮等。	master@capitalwater.cn		www.capitalwater.cn	CNE000001295
104846	600009	上海机场	2015-12-31	上海国际机场股份有限公司	航空运输业	G56	上海市浦东新区启航路900号	上海市浦东新区启航路900号	1998-02-11	1998-02-18	上海市	上海市	201207	黄晔	021-68341609	021-68341615	ir@shairport.com	苏骏青	91310000134616599A	报告期内公司无收购及出售资产、吸收合并事项	121.7984982477	31.1635546735	121.7980442477	31.1634016735	贾锐军	机场建设、施工、运营管理和与国内外航空运输有关的地面服务。	1926958448	为国内外航空运输企业及旅客提供地面保障服务，经营出租机场内航空营业场所、商业场所和办公场所，国内贸易（除专项规定）；广告经营，经营其它与航空运输有关的业务；货运代理；代理报验；代理报关；长途客运站（限分支机构经营）；综合开发，经营国家政策许可的其它投资项目，停车场管理及停车延伸服务。（依法须经批准的项目，经相关部门批准后方可开展经营活动）。	ir@shairport.com		www.shairport.com	CNE000000V89
104846	600009	上海机场	2016-12-31	上海国际机场股份有限公司	航空运输业	G56	上海市浦东新区启航路900号	上海市浦东新区启航路900号	1998-02-11	1998-02-18	上海市	上海市	201207	黄晔	021-68341609	021-68341615	ir@shairport.com	苏骏青	91310000134616599A	报告期内公司无收购及出售资产、吸收合并事项	121.7984982477	31.1635546735	121.7980442477	31.1634016735	贾锐军	机场建设、施工、运营管理和与国内外航空运输有关的地面服务。	1926958448	为国内外航空运输企业及旅客提供地面保障服务,经营出租机场内航空营业场所、商业场所和办公场所,国内贸易(除专项规定);广告经营,经营其它与航空运输有关的业务;货运代理;代理报验;代理报关;长途客运站(限分支机构经营);综合开发,经营国家政策许可的其它投资项目,停车场管理及停车延伸服务。(依法须经批准的项目,经相关部门批准后方可开展经营活动)。	ir@shairport.com		www.shairport.com	CNE000000V89
104846	600009	上海机场	2017-12-31	上海国际机场股份有限公司	航空运输业	G56	上海市浦东新区启航路900号	上海市浦东新区启航路900号	1998-02-11	1998-02-18	上海市	上海市	201207	黄晔	021-68341609	021-68341615	ir@shairport.com	苏骏青	91310000134616599A	报告期内公司无收购及出售资产、吸收合并事项	121.7984982477	31.1635546735	121.7980442477	31.1634016735	贾锐军	机场建设、施工、运营管理和与国内外航空运输有关的地面服务。	1926958448	为国内外航空运输企业及旅客提供地面保障服务,经营出租机场内航空营业场所、商业场所和办公场所,国内贸易(除专项规定);广告经营,经营其它与航空运输有关的业务;货运代理;代理报验;代理报关;长途客运站(限分支机构经营);综合开发,经营国家政策许可的其它投资项目,停车场管理及停车延伸服务。(依法须经批准的项目,经相关部门批准后方可开展经营活动)。	ir@shairport.com		www.shairport.com	CNE000000V89
104846	600009	上海机场	2018-12-31	上海国际机场股份有限公司	航空运输业	G56	上海市浦东新区启航路900号	上海市浦东新区启航路900号	1998-02-11	1998-02-18	上海市	上海市	201207	黄晔	021-68341609	021-68341615	ir@shairport.com	苏骏青	91310000134616599A	报告期内公司无收购及出售资产、吸收合并事项	121.7984982477	31.1635546735	121.7980442477	31.1634016735	贾锐军	机场建设、施工、运营管理和与国内外航空运输有关的地面服务。	1926958448	为国内外航空运输企业及旅客提供地面保障服务,经营出租机场内航空营业场所、商业场所和办公场所,国内贸易(除专项规定);广告经营,经营其它与航空运输有关的业务;货运代理;代理报验;代理报关;长途客运站(限分支机构经营);综合开发,经营国家政策许可的其它投资项目,停车场管理及停车延伸服务。(依法须经批准的项目,经相关部门批准后方可开展经营活动)。	ir@shairport.com		www.shairport.com	CNE000000V89
104847	600010	包钢股份	2015-12-31	内蒙古包钢钢联股份有限公司	黑色金属冶炼及压延加工业	C31	内蒙古自治区包头市昆区河西工业区	内蒙古自治区包头市昆区包钢厂区信息大楼东副楼三楼	1999-06-29	2001-03-09	内蒙古自治区	包头市	014010	董林	0472-2189515	0472-2189530	glgfzqb@126.com	于超		报告期内公司无收购及出售资产、吸收合并事项	109.8396961017	40.641291065	109.7770969901	40.6489550783	魏栓师	生产、销售黑色金属、钢铁制品及其压延加工产品。	32560737606	许可经营项目：主要生产销售黑色金属及其延压加工产品、冶金机械、设备及配件、焦炭及焦化副产品生产和 销售、汽车货物运输、钢铁生产技术咨询等。主要产品为钢铁产品、铁精粉的生产和销售。	bisc@sohu.com		www.btsteel.com	CNE0000017H1
104847	600010	包钢股份	2016-12-31	内蒙古包钢钢联股份有限公司	黑色金属冶炼及压延加工业	C31	内蒙古自治区内蒙古包头市昆区河西工业区	内蒙古自治区内蒙古包钢信息大楼主楼	1999-06-29	2001-03-09	内蒙古自治区	包头市	014010	白宝生	0472-2189515	0472-2189528	glgfzqb@126.com	于超	911500007014649754	报告期内公司无收购及出售资产、吸收合并事项	109.7813066245	40.6628955492	109.7770969901	40.6489550783	魏栓师	生产、销售黑色金属、钢铁制品及其压延加工产品。	32560737606	许可经营项目:主要生产销售黑色金属及其延压加工产品、冶金机械、设备及配件、焦炭及焦化副产品生产和销售、汽车货物运输、钢铁生产技术咨询等。主要产品为钢铁产品、铁精粉的生产和销售。	bisc@sohu.com		www.btsteel.com	CNE0000017H1
104847	600010	包钢股份	2017-12-31	内蒙古包钢钢联股份有限公司	黑色金属冶炼及压延加工业	C31	内蒙古自治区包头市昆区河西工业区	内蒙古自治区包头市包钢信息大楼主楼	1999-06-29	2001-03-09	内蒙古自治区	包头市	014010	白宝生	0472-2189515	0472-2189528	glgfzqb@126.com	于超	911500007014649754	报告期内公司无收购及出售资产、吸收合并事项	109.7813066245	40.6628955492	109.7770969901	40.6489550783	李德刚	生产、销售黑色金属、钢铁制品及其压延加工产品。	45585032648	许可经营项目:主要生产销售黑色金属及其延压加工产品、冶金机械、设备及配件、焦炭及焦化副产品生产和销售、汽车货物运输、钢铁生产技术咨询等。主要产品为钢铁产品、铁精粉的生产和销售。	bisc@sohu.com		www.btsteel.com	CNE0000017H1
104847	600010	包钢股份	2018-12-31	内蒙古包钢钢联股份有限公司	黑色金属冶炼及压延加工业	C31	内蒙古自治区包头市昆区河西工业区	内蒙古包头市昆区河西工业区包钢信息大楼主楼	1999-06-29	2001-03-09	内蒙古自治区	包头市	014010	白宝生	0472-2189515	0472-2189528	glgfzqb@126.com	于超	911500007014649754	报告期内公司无收购及出售资产、吸收合并事项	109.7770969901	40.6489550783	109.7770969901	40.6489550783	李德刚	生产、销售黑色金属、钢铁制品及其压延加工产品。	45585032648	许可经营项目:生产销售黑色金属及其延压加工产品、冶金机械、设备及配件、焦炭及焦化副产品生产和销售、汽车货物运输、钢铁生产技术咨询等。主要产品为钢铁产品、铁精粉、稀土精矿的生产和销售。	bisc@sohu.com		www.btsteel.com	CNE0000017H1
10675	600011	华能国际	2015-12-31	华能国际电力股份有限公司	电力、热力生产和供应业	D44	北京市西城区复兴门内大街6号华能大厦	北京市西城区复兴门内大街6号华能大厦	1994-06-30	1994-10-05	北京市	北京市	100031	杜大明	010-63226999	010-66412321	ddm@hpi.com.cn	孟晶		报告期内公司无收购及出售资产、吸收合并事项	116.3715401484	39.9064076085	116.3707681484	39.9063196085	曹培玺	投资、建设、经营管理电厂；开发、投资、经营以出口为主的其他相关企业。	15200383440	发电业务并销售电力予其各自所在地的电网运营企业	zqb@hpi.com.cn	00902	www.hpi.com.cn;www.hpi-ir.com.hk	CNE000001998
10675	600011	华能国际	2016-12-31	华能国际电力股份有限公司	电力、热力生产和供应业	D44	北京市西城区复兴门内大街6号华能大厦	北京市西城区复兴门内大街6号华能大厦	1994-06-30	1994-10-05	北京市	北京市	100031	杜大明	010-63226999	010-63226888	ddm@hpi.com.cn	孟晶	91110000625905205U	报告期内公司无收购及出售资产、吸收合并事项	116.3715401484	39.9064076085	116.3707681484	39.9063196085	曹培玺	投资、建设、经营管理电厂；开发、投资、经营以出口为主的其他相关企业。	15200383440		zqb@hpi.com.cn	00902	www.hpi.com.cn;www.hpi-ir.com.hk	CNE000001998
10675	600011	华能国际	2017-12-31	华能国际电力股份有限公司	电力、热力生产和供应业	D44	北京市西城区复兴门内大街6号华能大厦	北京市西城区复兴门内大街6号华能大厦	1994-06-30	1994-10-05	北京市	北京市	100031	黄朝全	010-63226999	010-63226888	cq_huang@hpi.com.cn	孟晶	91110000625905205U	报告期内公司无收购及出售资产、吸收合并事项	116.3715401484	39.9064076085	116.3707681484	39.9063196085	曹培玺	投资、建设、经营管理电厂；开发、投资、经营以出口为主的其他相关企业。	15200383440	发电业务并销售电力予其各自所在地的电网运营企业。	zqb@hpi.com.cn	00902	www.hpi.com.cn;www.hpi-ir.com.hk	CNE000001998
10675	600011	华能国际	2018-12-31	华能国际电力股份有限公司	电力、热力生产和供应业	D44	北京市西城区复兴门内大街6号华能大厦	北京市西城区复兴门内大街6号华能大厦	1994-06-30	1994-10-05	北京市	北京市	100031	黄朝全	010-63226999	010-63226888	cq_huang@hpi.com.cn	孟晶	91110000625905205U	报告期内公司无收购及出售资产、吸收合并事项	116.3715401484	39.9064076085	116.3707681484	39.9063196085	舒印彪	投资、建设、经营管理电厂；开发、投资、经营以出口为主的其他相关企业。	15698093359	发电业务并销售电力予其各自所在地的电网运营企业。	zqb@hpi.com.cn	00902	www.hpi.com.cn;www.hpi-ir.com.hk	CNE000001998
104859	600015	华夏银行	2015-12-31	华夏银行股份有限公司	货币金融服务	J66	北京市东城区建国门内大街22号	北京市东城区建国门内大街22号华夏银行大厦	1992-10-14	2003-09-12	北京市	北京市	100005	赵军学	010-85238570,85239938	010-85239605	zhdb@hxb.com.cn	张太旗	9111000010112001XW	报告期内公司无收购及出售资产、吸收合并事项	116.4223865882	39.9075621004	116.4224625882	39.9076091004	李民吉	吸收人民币存款；发放短期、中期和长期贷款；办理结算；办理票据贴现；发行金融债券；代理发行、代理兑付、承销政府债券；买卖政府债券；同业拆借；提供信用证服务及担保；代理收付款项；提供保管箱服务；外汇存款；外汇贷款；外汇汇款等。	10685572211	吸收公众存款；发放短 期、中期和长期贷款；办理国内外结算；办理票据承兑与贴现；发行金融债券；代理发 行、代理兑付、承销政府债券；买卖政府债券、金融债券；从事同业拆借；买卖、代理买 卖外汇；从事银行卡业务；提供信用证服务及担保；代理收付款项；提供保管箱服务；结 汇、售汇业务；保险兼业代理业务；租赁业务以及经中国银行业监督管理委员会(以下简称 “中国银监会”)批准的其他业务。	zhdb@hxb.com.cn		www.hxb.com.cn;www.95577.com.cn	CNE000001FW7
104859	600015	华夏银行	2016-12-31	华夏银行股份有限公司	货币金融服务	J66	北京市东城区建国门内大街22号	北京市东城区建国门内大街22号华夏银行大厦	1992-10-14	2003-09-12	北京市	北京市	100005	赵军学	010-85238570,85239938	010-85239605	zhdb@hxb.com.cn	张太旗	9111000010112001XW	报告期内公司无收购及出售资产、吸收合并事项	116.4223865882	39.9075621004	116.4224625882	39.9076091004	李民吉	吸收人民币存款；发放短期、中期和长期贷款；办理结算；办理票据贴现；发行金融债券；代理发行、代理兑付、承销政府债券；买卖政府债券；同业拆借；提供信用证服务及担保；代理收付款项；提供保管箱服务；外汇存款；外汇贷款；外汇汇款等。	10686000000	吸收公众存款;发放短期、中期和长期贷款;办理国内外结算;办理票据承兑与贴现;发行金融债券;代理发行、代理兑付、承销政府债券;买卖政府债券、金融债券;从事同业拆借;买卖、代理买卖外汇;从事银行卡业务;提供信用证服务及担保;代理收付款项;提供保管箱服务;结汇、售汇业务;保险兼业代理业务;租赁业务以及经中国银监会批准的其他业务。	zhdb@hxb.com.cn		www.hxb.com.cn,www.95577.com.cn	CNE000001FW7
104859	600015	华夏银行	2017-12-31	华夏银行股份有限公司	货币金融服务	J66	北京市东城区建国门内大街22号	北京市东城区建国门内大街22号华夏银行大厦	1992-10-14	2003-09-12	北京市	北京市	100005	赵军学	010-85238570,85239938	010-85239605	zhdb@hxb.com.cn	张太旗	9111000010112001XW	报告期内公司无收购及出售资产、吸收合并事项	116.4223865882	39.9075621004	116.4224625882	39.9076091004	李民吉	吸收人民币存款；发放短期、中期和长期贷款；办理结算；办理票据贴现；发行金融债券；代理发行、代理兑付、承销政府债券；买卖政府债券；同业拆借；提供信用证服务及担保；代理收付款项；提供保管箱服务；外汇存款；外汇贷款；外汇汇款等。	12822686653	吸收公众存款;发放短期、中期和长期贷款;办理国内外结算;办理票据承兑与贴现;发行金融债券;代理发行、代理兑付、承销政府债券;买卖政府债券、金融债券;从事同业拆借;买卖、代理买卖外汇;从事银行卡业务;提供信用证服务及担保;代理收付款项;提供保管箱服务;结汇、售汇业务;保险兼业代理业务;经银监会批准的其他业务。	zhdb@hxb.com.cn		www.hxb.com.cn;www.95577.com.cn	CNE000001FW7
104859	600015	华夏银行	2018-12-31	华夏银行股份有限公司	货币金融服务	J66	北京市东城区建国门内大街22号	北京市东城区建国门内大街22号华夏银行大厦	1992-10-14	2003-09-12	北京市	北京市	100005	赵军学	010-85238570,85239938	010-85239605	zhdb@hxb.com.cn	张太旗	9111000010112001XW	报告期内公司无收购及出售资产、吸收合并事项	116.4223865882	39.9075621004	116.4224625882	39.9076091004	李民吉	吸收人民币存款；发放短期、中期和长期贷款；办理结算；办理票据贴现；发行金融债券；代理发行、代理兑付、承销政府债券；买卖政府债券；同业拆借；提供信用证服务及担保；代理收付款项；提供保管箱服务；外汇存款；外汇贷款；外汇汇款等。	15387000000	吸收公众存款;发放短期、中期和长期贷款;办理国内外结算;办理票据承兑与贴现;发行金融债券;代理发行、代理兑付、承销政府债券;买卖政府债券、金融债券;从事同业拆借;买卖、代理买卖外汇;从事银行卡业务;提供信用证服务及担保;代理收付款项;提供保管箱服务;结汇、售汇业务;保险兼业代理业务;租赁业务以及经中国银保监会批准的其他业务。	zhdb@hxb.com.cn		www.hxb.com.cn,www.95577.com.cn	CNE000001FW7
104860	600016	民生银行	2015-12-31	中国民生银行股份有限公司	货币金融服务	J66	北京市西城区复兴门内大街二号	北京市西城区复兴门内大街二号	1996-02-07	2000-12-19	北京市	北京市	100031	万青元	010-68946790	010-58560720	cmbc@cmbc.com.cn	王洪刚		报告期内公司无收购及出售资产、吸收合并事项	116.3726601484	39.9068876085	116.3726231484	39.9064516085	洪崎	经营吸收公众存款；发放短期、中期和长期贷款；办理国内外结算；办理票据贴现；发行金融债券等。	36485348752	公司及个人银行业务、资金业务、融资租赁业务、基金及资产管理业务、投资银行 业务及提供其他相关金融服务。	cmbc@cmbc.com.cn	01988	www.cmbc.com.cn	CNE0000015Y0
104860	600016	民生银行	2016-12-31	中国民生银行股份有限公司	货币金融服务	J66	北京市西城区复兴门内大街2号	上海市浦东新区陆家嘴东路166号中国保险大厦36楼	1996-02-07	2000-12-19	北京市	北京市	100031	方舟	010-58560975	010-58560720	cmbc@cmbc.com.cn	王洪刚	91110000100018988F	报告期内公司无收购及出售资产、吸收合并事项	116.3726601484	39.9068876085	116.3726231484	39.9064516085	洪崎	经营吸收公众存款；发放短期、中期和长期贷款；办理国内外结算；办理票据贴现；发行金融债券等。	36485000000	公司及个人银行业务、资金业务、融资租赁业务、基金及资产管理业务、投资银行业务及提供其他相关金融服务。	cmbc@cmbc.com.cn	01988	www.cmbc.com.cn	CNE0000015Y0
104860	600016	民生银行	2017-12-31	中国民生银行股份有限公司	货币金融服务	J66	北京市西城区复兴门内大街2号	上海市浦东新区陆家嘴东路166号中国保险大厦36楼	1996-02-07	2000-12-19	北京市	北京市		方舟	010-58560975	010-58560720	cmbc@cmbc.com.cn	王洪刚	91110000100018988F	收购及出售资产、吸收合并事项:本公司严格按照《公司章程》、《基本财务规则》及《固定资产管理办法》等制度规定,对符合报废条件的固定资产进行报废残值处置及账务处理,无损害股东权益或造成本公司资产流失等情况。	116.3726601484	39.9068876085	116.3726231484	39.9064516085	洪崎	经营吸收公众存款；发放短期、中期和长期贷款；办理国内外结算；办理票据贴现；发行金融债券等。	36485000000	公司及个人银行业务、资金业务、融资租赁业务、基金及资产管理业务、投资银行业务及提供其他相关金融服务。	cmbc@cmbc.com.cn	01988	www.cmbc.com.cn	CNE0000015Y0
104860	600016	民生银行	2018-12-31	中国民生银行股份有限公司	货币金融服务	J66	北京市西城区复兴门内大街2号	北京市西城区复兴门内大街2号	1996-02-07	2000-12-19	北京市	北京市	100031	白丹	010-58560975	010-58560720	cmbc@cmbc.com.cn	王洪刚	91110000100018988F	报告期内公司无收购及出售资产、吸收合并事项	116.3726231484	39.9064516085	116.3726231484	39.9064516085	洪崎	经营吸收公众存款；发放短期、中期和长期贷款；办理国内外结算；办理票据贴现；发行金融债券等。	43782000000	公司及个人银行业务、资金业务、融资租赁业务、基金及资产管理业务、投资银行业务及提供其他相关金融服务。	cmbc@cmbc.com.cn	01988	www.cmbc.com.cn	CNE0000015Y0
104873	600018	上港集团	2015-12-31	上海国际港务(集团)股份有限公司	水上运输业	G55	上海市浦东新区芦潮港镇同汇路1号综合大楼A区4楼	上海市虹口区东大名路358号国际港务大厦	1988-10-21	2006-10-26	上海市	上海市	200080	丁向明	021-55333388	021-35308688	dongmi@portshanghai.com.cn			报告期内公司无收购及出售资产、吸收合并事项	121.4960566225	31.2470426834	121.8813875954	30.8758633968	陈戌源	集装箱业务、散杂货业务、港口服务和港口物流业务。	23173674650	国内外货物（含集装箱）装卸（含过驳）、储 存、中转和水陆运输；集装箱拆拼箱、清洗、修理、制造和租赁；国际航运、仓储、保管、加工、 配送及物流信息管理；为国际旅客提供候船和上下船舶设施和服务；船舶引水、拖带，船务代理， 货运代理；为船舶提供燃物料、生活品供应等船舶港口服务；港口设施租赁；港口信息、技术咨 询服务；港口码头建设、管理和经营；港口起重设备、搬运机械、机电设备及配件的批发及进出 口（涉及行政许可的凭许可证经营）。	600018@portshanghai.com.cn		www.portshanghai.com.cn	CNE0000013N8
104873	600018	上港集团	2016-12-31	上海国际港务(集团)股份有限公司	水上运输业	G55	上海市浦东新区芦潮港镇同汇路1号综合大楼A区4楼	上海市虹口区东大名路358号(国际港务大厦)	1988-10-21	2006-10-26	上海市	上海市	200080	丁向明	021-55333388	021-35308688	dongmi@portshanghai.com.cn			报告期内公司无收购及出售资产、吸收合并事项	121.8818905954	30.8754993968	121.8813875954	30.8758633968	陈戌源	集装箱业务、散杂货业务、港口服务和港口物流业务。	23173674650	国内外货物(含集装箱)装卸(含过驳)、储存、中转和水陆运输;集装箱拆拼箱、清洗、修理、制造和租赁;国际航运、仓储、保管、加工、配送及物流信息管理;为国际旅客提供候船和上下船舶设施和服务;船舶引水、拖带,船务代理,货运代理;为船舶提供燃物料、生活品供应等船舶港口服务;港口设施租赁;港口信息、技术咨询服务;港口码头建设、管理和经营;港口起重设备、搬运机械、机电设备及配件的批发及进出口(涉及行政许可的凭许可证经营)。本公司从事的主营业务为集装箱装卸业务、散杂货装卸业务、港口服务业务和港口物流业务。	600018@portshanghai.com.cn		www.portshanghai.com.cn	CNE0000013N8
104873	600018	上港集团	2017-12-31	上海国际港务(集团)股份有限公司	水上运输业	G55	上海市浦东新区芦潮港镇同汇路1号综合大楼A区4楼	上海市虹口区东大名路358号(国际港务大厦)	1988-10-21	2006-10-26	上海市	上海市	200080	丁向明	021-55333388	021-35308688	dongmi@portshanghai.com.cn			报告期内公司无收购及出售资产、吸收合并事项	121.8818905954	30.8754993968	121.8813875954	30.8758633968	陈戌源	集装箱业务、散杂货业务、港口服务和港口物流业务。	23173674650	国内外货物(含集装箱)装卸(含过驳)、储存、中转和水陆运输;集装箱拆拼箱、清洗、修理、制造和租赁;国际航运、仓储、保管、加工、配送及物流信息管理;为国际旅客提供候船和上下船舶设施和服务;船舶引水、拖带,船务代理,货运代理;为船舶提供燃物料、生活品供应等船舶港口服务;港口设施租赁;港口信息、技术咨询服务;港口码头建设、管理和经营;港口起重设备、搬运机械、机电设备及配件的批发及进出口(涉及行政许可的凭许可证经营)。	600018@portshanghai.com.cn		www.portshanghai.com.cn	CNE0000013N8
104873	600018	上港集团	2018-12-31	上海国际港务(集团)股份有限公司	水上运输业	G55	上海市浦东新区芦潮港镇同汇路1号综合大楼A区4楼	上海市虹口区东大名路358号(国际港务大厦)	1988-10-21	2006-10-26	上海市	上海市	200080	丁向明	021-55333388	021-35308688	dongmi@portshanghai.com.cn			重大资产和股权出售:星外滩原为公司全资子公司,主要负责在上海市虹口区海门路55号地块内从事商业及办公房地产的开发建设。2018年9月6日,经公司第二届董事会第六十九次会议审议通过,董事会同意公司在上海联合产权交易所以公开挂牌方式一次性出售公司所持星外滩100%股权。公司先后于2018年9月7日、10月12日在上海联合产权交易所进行预挂牌和正式挂牌,出售公司所持星外滩100%股权,挂牌价格为人民币12,785,653,298.23元;11月8日,星外滩100%股权在上海联合产权交易所公开挂牌出售的公示期满,DIAMONDTWOPTE.LTD.在上海联合产权交易所以人民币12,785,653,298.23元的挂牌底价成功竞得星外滩100%股权,并于11月9日向上海联合产权交易所支付了交易保证金;11月14日,公司与DIAMONDTWOPTE.LTD.共同签署《产权交易合同》;12月24日,星…	121.4960766225	31.2467036834	121.8813875954	30.8758633968	陈戌源	集装箱业务、散杂货业务、港口服务和港口物流业务。	23173674650	国内外货物(含集装箱)装卸(含过驳)、储存、中转和水陆运输;集装箱拆拼箱、清洗、修理、制造和租赁;国际航运、仓储、保管、加工、配送及物流信息管理;为国际旅客提供候船和上下船舶设施和服务;船舶引水、拖带,船务代理,货运代理;为船舶提供燃物料、生活品供应等船舶港口服务;港口设施租赁;港口信息、技术咨询服务;港口码头建设、管理和经营;港口起重设备、搬运机械、机电设备及配件的批发及进出口(涉及行政许可的凭许可证经营)。	600018@portshanghai.com.cn		www.portshanghai.com.cn	CNE0000013N8
104874	600019	宝钢股份	2015-12-31	宝山钢铁股份有限公司	黑色金属冶炼及压延加工业	C31	上海市宝山区富锦路885号宝钢指挥中心	上海市宝山区富锦路885号宝钢指挥中心	2000-02-03	2000-12-12	上海市	上海市	201900	朱可炳	021-26647000	021-26646999	ir@baosteel.com	虞红	91310000631696382C	报告期内公司无收购及出售资产、吸收合并事项	121.4601405874	31.4088780644	121.4602305874	31.4093990644	陈德荣	钢铁冶炼、加工，电力、煤炭、工业气体生产等。	16467517524	钢铁冶炼、加工、电力、煤炭、工业气体生产、码头、仓储、运输等与 钢铁相关的业务，技术开发、技术转让、技术服务和技术管理咨询服务，汽车修理，经营本 企业自产产品及技术的出口业务，经营本企业生产、科研所需的原辅材料、仪器仪表、机械 设备、零配件及技术的进口业务(国家限定公司经营和国家禁止进出口的商品及技术除外)， 经营进料加工和“三来一补”业务。	ir@baosteel.com		bg.baosteel.com	CNE0000015R4
104874	600019	宝钢股份	2016-12-31	宝山钢铁股份有限公司	黑色金属冶炼及压延加工业	C31	上海市宝山区富锦路885号宝钢指挥中心	上海市宝山区富锦路885号宝钢指挥中心	2000-02-03	2000-12-12	上海市	上海市	201900	吴一鸣	021-26647000	021-26646999	ir@baosteel.com	虞红	91310000631696382C	报告期内公司无收购及出售资产、吸收合并事项	121.4601405874	31.4088780644	121.4602305874	31.4093990644	戴志浩	钢铁冶炼、加工，电力、煤炭、工业气体生产等。	16450393624	钢铁冶炼、加工、电力、煤炭、工业气体生产、码头、仓储、运输等与钢铁相关的业务,技术开发、技术转让、技术服务和技术管理咨询服务,汽车修理,经营本企业自产产品及技术的出口业务,经营本企业生产、科研所需的原辅材料、仪器仪表、机械设备、零配件及技术的进口业务(国家限定公司经营和国家禁止进出口的商品及技术除外),经营进料加工和"三来一补"业务。	ir@baosteel.com		www.baosteel.com	CNE0000015R4
104874	600019	宝钢股份	2017-12-31	宝山钢铁股份有限公司	黑色金属冶炼及压延加工业	C31	上海市宝山区富锦路885号宝钢指挥中心	上海市宝山区富锦路885号宝钢指挥中心	2000-02-03	2000-12-12	上海市	上海市	201900	吴琨宗	021-26647000	021-26646999	ir@baosteel.com	夏志龙	91310000631696382C	报告期内公司无收购及出售资产、吸收合并事项	121.4601405874	31.4088780644	121.4602305874	31.4093990644	戴志浩	钢铁冶炼、加工，电力、煤炭、工业气体生产等。	22268111875	钢铁冶炼、加工、电力、煤炭、工业气体生产、码头、仓储、运输等与钢铁相关的业务,技术开发、技术转让、技术服务和技术管理咨询服务,汽车修理,商品和技术进出口,[有色金属冶炼及压延加工,工业炉窑,化工原料及产品的生产和销售,金属矿石、煤炭、钢铁、非金属矿石装卸、港区服务,水路货运代理,水路货物装卸联运,船舶代理,国外承包工程劳务合作,国际招标,工程招标代理,国内贸易,对销、转口贸易,废钢,煤炭,燃料油,化学危险品(限批发)](限分支机构经营),机动车安检,化工原料及产品的生产和销售。	ir@baosteel.com		www.baosteel.com	CNE0000015R4
104874	600019	宝钢股份	2018-12-31	宝山钢铁股份有限公司	黑色金属冶炼及压延加工业	C31	上海市宝山区富锦路885号宝钢指挥中心	上海市宝山区富锦路885号宝钢指挥中心	2000-02-03	2000-12-12	上海市	上海市	201999	王娟	021-26647000	021-26646999	ir@baosteel.com	夏志龙	91310000631696382C	报告期内公司无收购及出售资产、吸收合并事项	121.4602305874	31.4093990644	121.4602305874	31.4093990644	邹继新	钢铁冶炼、加工，电力、煤炭、工业气体生产等。	22267915125	钢铁冶炼、加工、电力、煤炭、工业气体生产、码头、仓储、运输等与钢铁相关的业务,技术开发、技术转让、技术服务和技术管理咨询服务,汽车修理,商品和技术进出口,[有色金属冶炼及压延加工,工业炉窑,化工原料及产品的生产和销售,金属矿石、煤炭、钢铁、非金属矿石装卸、港区服务,水路货运代理,水路货物装卸联运,船舶代理,国外承包工程劳务合作,国际招标,工程招标代理,国内贸易,对销、转口贸易,废钢,煤炭,燃料油,化学危险品(限批发)](限分支机构经营),机动车安检,化工原料及产品的生产和销售。	ir@baosteel.com		www.baosteel.com	CNE0000015R4
104774	600021	上海电力	2015-12-31	上海电力股份有限公司	电力、热力生产和供应业	D44	上海市中山南路268号	上海市中山南路268号36层	1998-06-04	2003-10-29	上海市	上海市	200010	夏梅兴	021-23108718,23108800	021-23108717	sepco@shanghaipower.com	邹忆		报告期内公司无收购及出售资产、吸收合并事项	121.5031300781	31.2216559245	121.5023620781	31.2212229245	王运丹	从事火力发电厂的运营，向用户提供电力和热力产品。	2139739257	火力发电、风力发电及光伏发电。	sepco@shanghaipower.com		www.shanghaipower.com	CNE000001G53
104774	600021	上海电力	2016-12-31	上海电力股份有限公司	电力、热力生产和供应业	D44	上海市中山南路268号	上海市中山南路268号	1998-06-04	2003-10-29	上海市	上海市	200010	夏梅兴	021-23108718,23108800	021-23108717	sepco@shanghaipower.com	邹忆	913100006311887755	报告期内公司无收购及出售资产、吸收合并事项	121.5031300781	31.2216559245	121.5023620781	31.2212229245	王运丹	从事火力发电厂的运营，向用户提供电力和热力产品。	2139739257	火力发电、风力发电及光伏发电。	sepco@shanghaipower.com		www.shanghaipower.com	CNE000001G53
10123239	600023	浙能电力	2015-12-31	浙江浙能电力股份有限公司	电力、热力生产和供应业	D44	杭州市天目山路152号浙能大厦2楼	浙江省杭州市天目山路152号浙能大厦	1992-03-14	2013-12-19	浙江省	杭州市	310007	曹路	0571-87210223	0571-89938659	zzep@zjenergy.com.cn		913300001429120051	报告期内公司无收购及出售资产、吸收合并事项	120.1401480655	30.2719528428	120.1384770655	30.2719278428	童亚辉	电力、燃气及水的生产和供应	13600689988	电力开发，经营管理，电力及节能技术的研发、技术咨询、节能产品销售，电力工程、电力环保工程的建设和监理，电力设备检修。主要产品为电力和热力。	zzep@zjenergy.com.cn		www.zzepc.com.cn	CNE100001SP3
10123239	600023	浙能电力	2016-12-31	浙江浙能电力股份有限公司	电力、热力生产和供应业	D44	浙江省杭州市天目山路152号浙能大厦2楼	浙江省杭州市天目山路152号浙能大厦	1992-03-14	2013-12-19	浙江省	杭州市	310007	曹路	0571-87210223	0571-89938659	zzep@zjenergy.com.cn		913300001429120051	重大资产和股权出售:根据浙江省经济和信息化委员会《关于萧山发电厂1#、2#燃煤发电机组关停的批复》(浙经信电力[2015]505号),并经公司第二届董事会第十四次会议审议通过,萧山发电厂于2015年12月底关停1#和2#机组,相关拆除工作于2016年4月底完成。根据公司第二届董事会第二十三次会议决议,萧山发电厂关停机组资产包二(主体设备及相关房屋建构筑物)以不低于评估价1,164万元为底价,通过浙江省产权交易所公开挂牌转让。详见公司于2016年12月22日披露的《关于萧山发电厂关停机组资产处置的公告》。	120.1401480655	30.2719528428	120.1384770655	30.2719278428	吴国潮	电力、燃气及水的生产和供应	13600689988	电力开发,经营管理,电力及节能技术的研发、技术咨询、节能产品销售,电力工程、电力环保工程的建设和监理,电力设备检修。主要产品为电力和热力。	zzep@zjenergy.com.cn		www.zzepc.com.cn	CNE100001SP3
10123239	600023	浙能电力	2017-12-31	浙江浙能电力股份有限公司	电力、热力生产和供应业	D44	浙江省杭州市天目山路152号浙能大厦2楼	浙江省杭州市天目山路152号浙能大厦	1992-03-14	2013-12-19	浙江省	杭州市	310007	曹路	0571-87210223	0571-89938659	zzep@zjenergy.com.cn		913300001429120051	重大资产和股权出售:本报告期,公司向台州市椒江城市发展投资集团有限公司(台州市椒江区国有资产管理局下属全资企业)出售台州市凤凰山庄有限公司14.29%的股权。根据天源资产评估有限公司出具的天源评报字[2017]第234号评估报告,截至2017年2月28日,台州市凤凰山庄有限公司所有者权益账面价值2,468.00万元,评估价值6,891.35万元,评估增值4,423.35万元。上述14.29%股权以评估值作价984.77万元,应收台州市凤凰山庄有限公司股利及利息136.94万元,股权转让价款合计1,121.71万元。	120.1401480655	30.2719528428	120.1384770655	30.2719278428	孙玮恒	电力、燃气及水的生产和供应	13600689988	电力开发,经营管理,电力及节能技术的研发、技术咨询、节能产品销售,电力工程、电力环保工程的建设与监理,电力设备检修,售电服务(凭许可证经营),冷、热、热水、蒸汽的销售,电力及节能技术的研发、技术咨询,合同能源管理。(依法须经批准的项目,经相关部门批准后方可开展经营活动)。	zzep@zjenergy.com.cn		www.zzepc.com.cn	CNE100001SP3
10123239	600023	浙能电力	2018-12-31	浙江浙能电力股份有限公司	电力、热力生产和供应业	D44	浙江省杭州市天目山路152号浙能大厦2楼	浙江省杭州市天目山路152号浙能大厦	1992-03-14	2013-12-19	浙江省	杭州市	310007	曹路	0571-87210223	0571-89938659	zzep@zjenergy.com.cn		913300001429120051	报告期内公司无收购及出售资产、吸收合并事项	120.1401480655	30.2719528428	120.1384770655	30.2719278428	孙玮恒	电力、燃气及水的生产和供应	13600689988	电力开发,经营管理,电力及节能技术的研发、技术咨询、节能产品销售,电力工程、电力环保工程的建设与监理,电力设备检修,售电服务(凭许可证经营),冷、热、热水、蒸汽的销售,电力及节能技术的研发、技术咨询,合同能源管理。(依法须经批准的项目,经相关部门批准后方可开展经营活动。	zzep@zjenergy.com.cn		www.zzepc.com.cn	CNE100001SP3
106721	600025	华能水电	2018-12-31	华能澜沧江水电股份有限公司	电力、热力生产和供应业	D44	云南省昆明市官渡区世纪城中路1号	云南省昆明市官渡区世纪城中路1号	2001-02-08	2017-12-15	云南省	昆明市	650214	邓炳超	0871-67216608	0871-67217564	hnsd@lcjsd.cn	孙文伟	915300007194494905	重大资产和股权出售:1.华能果多水电有限公司51%股权处置公司全资子公司华能澜沧江上游水电有限公司于2016年11月14日在上海联合产权交易所公开挂牌转让华能果多水电有限公司51%股权,挂牌金额为38,279.07万元。2017年12月25日,华能澜沧江上游水电有限公司与西藏开发投资集团有限公司签订华能果多水电有限公司51%股权转让《产权交易合同》。2018年3月15日,华能澜沧江上游水电有限公司办理完成华能果多水电有限公司51%股权交割及工商变更登记手续,并已收到本次交易的全部交易价款38,279.07万元。本次股权转让完成后,华能澜沧江上游水电有限公司持有西藏开投果多水电有限公司15%的股权(详见2018-014公告)。2.觉巴水电厂整体权益处置公司全资子公司华能澜沧江上游水电有限公司于2016年12月27日在上海联合产权交易所公开挂牌转让其所持有的觉巴水电厂整体权益,挂牌金额为38…	102.7473910482	24.9620064371	102.7466880482	24.9623524371	袁湘华	水力发电项目的开发、投资、建设、运营与管理。	18000000000	水力发电项目的开发、投资、建设、运营与管理,主要产品是电力	hnsd@lcjsd.cn		www.hnlcj.cn	CNE100002T71
103474	600027	华电国际	2015-12-31	华电国际电力股份有限公司	电力、热力生产和供应业	D44	山东省济南市经三路14号	北京市西城区宣武门内大街2号	1994-06-28	1999-06-30	山东省	济南市	100031	周连青	010-83567779	010-83567967	zhoulq@hdpi.com.cn	张戈临	913700002671702282	报告期内公司无收购及出售资产、吸收合并事项	116.374463724	39.9044142268	116.9981258238	36.6636270313	李庆奎	提供电力和热力。	9862976653	发电、供热、煤炭销售及其他相关业务，电力业务相关的技术服务、信息咨询，所发的电力主要输往各电厂所在地的电网公司	hdpi@hdpi.com.cn	01071	www.hdpi.com.cn	CNE000001LJ2
103474	600027	华电国际	2017-12-31	华电国际电力股份有限公司	电力、热力生产和供应业	D44	山东省济南市经十路14800号	北京市西城区宣武门内大街2号	1994-06-28	1999-06-30	山东省	济南市	100031	周连青	010-83567779	010-83567967	zhoulq@hdpi.com.cn	张戈临	913700002671702282	报告期内公司无收购及出售资产、吸收合并事项	116.374463724	39.9044142268	117.0638075626	36.6499767245	赵建国	提供电力和热力。	9862977000	发电、供热、煤炭销售及其他相关业务,电力业务相关的技术服务、信息咨询	hdpi@hdpi.com.cn	01071	www.hdpi.com.cn	CNE000001LJ2
103474	600027	华电国际	2018-12-31	华电国际电力股份有限公司	电力、热力生产和供应业	D44	山东省济南市经十路14800号	北京市西城区宣武门内大街2号	1994-06-28	1999-06-30	山东省	济南市	100031	周连青	010-83567779	010-83567967	zhoulq@hdpi.com.cn	张戈临	913700002671702282	破产重整相关事项:2018年8月,本公司一家子公司华电宿州生物质能发电有限公司(“宿州生物质能公司”)的债权人向安徽省宿州市中级人民法院申请其破产清算,9月5日法院受理了破产申请,9月12日指定安徽皖光大律师事务所为破产清算管理人。自9月份起,宿州生物质能公司不再纳入本公司合并报表范围,按照会计准则要求,在资产减值项目下确认损失人民币2.57亿元,同时投资收益项目下确认收益人民币2.20亿元。	116.374463724	39.9044142268	117.0638075626	36.6499767245	赵建国	提供电力和热力。	9862976653	发电、供热、煤炭销售及其他相关业务,电力业务相关的技术服务、信息咨询,所发的电力主要输往各电厂所在地的电网公司。	hdpi@hdpi.com.cn	01071	www.hdpi.com.cn	CNE000001LJ2
102088	600028	中国石化	2015-12-31	中国石油化工股份有限公司	石油和天然气开采业	B07	北京市朝阳区朝阳门北大街22号	北京市朝阳区朝阳门北大街22号	2000-02-25	2000-10-18	北京市	北京市	100728	黄文生	010-59960028	010-59960386	ir@sinopec.com	郑保民		报告期内公司无收购及出售资产、吸收合并事项	116.4363796893	39.9248901073	116.4362340293	39.9250541136	王玉普	非煤矿山（石油、天然气等）、危险化学品（乙烯、丙烯、丁二烯、石脑油等）、重油、橡胶及其他石油化工原料和产品的生产、储存、销售等。	121071209646	(1) 勘探、开发及生产原油及天然气； (2) 炼油、运输、储存及营销原油及石油产品；及 (3) 生产及销售化工产品。	ir@sinopec.com;media@sinopec.com	00386	www.sinopec.com	CNE0000018G1
102088	600028	中国石化	2016-12-31	中国石油化工股份有限公司	石油和天然气开采业	B07	北京市朝阳区朝阳门北大街22号	北京市朝阳区朝阳门北大街22号	2000-02-25	2000-10-18	北京市	北京市	100728	黄文生				郑保民	91110000710926094P	重大资产和股权出售:2016年8月2日,中国石化第六届董事会第七次会议审议通过了关于天然气川气东送管道业务引资的议案,同意以川气东送管道公司为平台进行公开引资。2016年12月12日,中国石化全资子公司中国石化天然气有限责任公司(以下简称"天然气公司")与中国人寿保险股份有限公司(以下简称"中国人寿")及国投交通控股有限公司(以下简称"国投交通")签署了《关于中石化川气东送天然气管道有限公司之增资协议》,中国人寿及国投交通以现金共计人民币228亿元人民币认购天然气公司的全资子公司川气东送管道公司50%的股权,其中,中国人寿出资人民币200亿元,国投交通出资人民币28亿元。本次增资完成后,川气东送管道公司的注册资本由人民币1亿元增加至人民币2亿元,天然气公司、中国人寿和国投交通分别持有川气东送管道公司50%、43.86%和6.14%的股权。具体内容参见中国石化于2016年12月13日刊登在…	116.4363796893	39.9248901073	116.4362340293	39.9250541136	王玉普	非煤矿山（石油、天然气等）、危险化学品（乙烯、丙烯、丁二烯、石脑油等）、重油、橡胶及其他石油化工原料和产品的生产、储存、销售等。	121071000000	石油与天然气勘探开采、管道运输、销售;石油炼制、石油化工、煤化工、化纤及其他化工产品的生产与销售、储运;石油、天然气、石油产品、石油化工及其他化工产品和其他商品、技术的进出口、代理进出口业务;技术、信息的研究、开发、应用。	ir@sinopec.com;media@sinopec.com	00386	www.sinopec.com	CNE0000018G1
102088	600028	中国石化	2017-12-31	中国石油化工股份有限公司	石油和天然气开采业	B07	北京市朝阳区朝阳门北大街22号	北京市朝阳区朝阳门北大街22号	2000-02-25	2000-10-18	北京市	北京市	100728	黄文生	010-59960028	010-59960386	ir@sinopec.com	郑保民	91110000710926094P	报告期内公司无收购及出售资产、吸收合并事项	116.4363796893	39.9248901073	116.4362340293	39.9250541136	王玉普	非煤矿山（石油、天然气等）、危险化学品（乙烯、丙烯、丁二烯、石脑油等）、重油、橡胶及其他石油化工原料和产品的生产、储存、销售等。	121071000000	石油和天然气和化工经营业务	ir@sinopec.com;media@sinopec.com	00386	www.sinopec.com	CNE0000018G1
102088	600028	中国石化	2018-12-31	中国石油化工股份有限公司	石油和天然气开采业	B07	北京市朝阳区朝阳门北大街22号	北京市朝阳区朝阳门北大街22号	2000-02-25	2000-10-18	北京市	北京市	100728	黄文生	010-59960028	010-59960386	ir@sinopec.com	郑保民	91110000710926094P	报告期内公司无收购及出售资产、吸收合并事项	116.4363796893	39.9248901073	116.4362340293	39.9250541136	戴厚良	非煤矿山（石油、天然气等）、危险化学品（乙烯、丙烯、丁二烯、石脑油等）、重油、橡胶及其他石油化工原料和产品的生产、储存、销售等。	121071000000	勘探、开发及生产原油及天然气;炼油、运输、储存及营销原油及石油产品;及生产及销售化工产品。	ir@sinopec.com;media@sinopec.com	00386	www.sinopec.com/listco	CNE0000018G1
103277	600029	南方航空	2015-12-31	中国南方航空股份有限公司	航空运输业	G56	广东省广州市经济技术开发区	广东省广州市机场路278号	1995-03-25	1997-07-31	广东省	广州市	510405	谢兵	020-86124462	020-86659040	ir@csair.com	徐阳		1.重大资产和股权出售情况： 2015年12月17日，本公司与波音公司签订《7架B757飞机、5台备用发动机和航材出售合同》、《6架B757飞机和4台备用发动机出售合同》、《3架B757飞机和、4台备用发动机和航材出售合同》，向波音公司购买80架B737NG/MAX飞机，并向波音公司出售13架B757飞机和9台备用发动机、3架B733飞机和4台备用发动机以及部分航材。 2.资产交易、企业合并事项 2015年12月8日,本公司与厦门建发集团有限公司签订《股权转让寸办议》,以人民币626,666,667元购买厦门航空有限公司4%的股权。上述有关交易详情敬请参见公司于2015年12月9日在《中国证券报》、《上海证券报》、《证券时报》和上海证券交易所以及网站披露的的相关公告。 2015年12月17日,本公司与波音公司签订《80架B737NG/MAX飞机购买合同》和《7架B757飞机、5台备用发动…	113.2598819371	23.1753925601	113.2537876571	23.1322174999	王昌顺	提供国内、香港地区及国际航空客运、货运及邮运服务。	9817567000	提供国内、港澳台地区及国际航空客运、货运及邮运服务。	webmaster@csair.com	01055	www.csair.com	CNE000001FG0
103277	600029	南方航空	2016-12-31	中国南方航空股份有限公司	航空运输业	G56	广东省广州市黄埔区玉岩路12号冠昊科技园一期办公楼3楼301室	广东省广州市机场路278号	1995-03-25	1997-07-31	广东省	广州市		谢兵	020-86124462	020-86659040	ir@csair.com	徐阳	91440000100017600N	资产交易、企业合并事项:2016年2月2日,本公司与控股股东南航集团签订《中国南方航空集团公司与中国南方航空股份有限公司关於出让中国南航集团进出口贸易有限公司100%股权之转让协议》,以人民币40,057.04万元向南航集团购买中国南航集团进出口贸易有限公司100%股权􀇄上述交易详情请参见公司於2016年2月3日在《中国证券报》、《上海证券报》、《证券时报》和上海证券交易所网站披露的相关公告。上述交易已於2016年8月完成。2016年4月26日,本公司控股子公司厦门航空与波音公司签订《10架B737-800飞机购买合同》,向波音公司购买10架B737-800飞机,上述交易详情请参见公司於2016年4月27日在《中国证券报》、《上海证券报》、《证券时报》和上海证券交易所网站披露的相关公告。2016年7月27日,本公司控股子公司厦门航空与波音公司签订《6架B787-9飞机购买合同》,向波音公…	113.5323846097	23.1698992936	113.5323966097	23.1706072936	王昌顺	提供国内、香港地区及国际航空客运、货运及邮运服务。	9817567000	提供国内、港澳台地区及国际航空客运、货运及邮运服务。	webmaster@csair.com	01055	www.csair.com	CNE000001FG0
103277	600029	南方航空	2017-12-31	中国南方航空股份有限公司	航空运输业	G56	广东省广州市黄埔区玉岩路12号冠昊科技园区一期办公楼3楼301室	广东省广州市机场路278号	1995-03-25	1997-07-31	广东省	广州市	510405	谢兵	020-86124462	020-86124462	ir@csair.com	徐阳	91440000100017600N	报告期内公司无收购及出售资产、吸收合并事项	113.5323846097	23.1698992936	113.5323966097	23.1706072936	王昌顺	提供国内、香港地区及国际航空客运、货运及邮运服务。	10088173272	(1)提供国内、地区和国际定期及不定期航空客、货、邮、行李运输服务;(2)提供通用航空服务;(3)提供航空器维修服务;(4)经营国内外航空公司的代理业务;(5)提供航空配餐服务(仅限分支机构经营);(6)进行其他航空业务及相关业务,包括为该等业务进行广告宣传;(7)进行其他航空业务及相关业务(限保险兼业代理业务:人身意外伤害险);航空地面延伸业务;民用航空器机型培训(限分支机构凭许可证经营);资产租赁;工程管理与技术咨询;航材销售;旅游代理服务;商品零售批发。(依法须经批准的项目,经相关部门批准后方可开展经营活动。)	webmaster@csair.com	01055	www.csair.com	CNE000001FG0
103277	600029	南方航空	2018-12-31	中国南方航空股份有限公司	航空运输业	G56	广东省广州市黄埔区玉岩路12号冠昊科技园区一期办公楼3楼301室	广东省广州市白云区齐心路68号中国南方航空大厦	1995-03-25	1997-07-31	广东省	广州市	510403	谢兵	020-86112480	020-86659040	ir@csair.com	徐阳	91440000100017600N	报告期内公司无收购及出售资产、吸收合并事项	113.2708298771	23.1813213801	113.5323966097	23.1706072936	王昌顺	提供国内、香港地区及国际航空客运、货运及邮运服务。	12267172286	提供国内、港澳台地区及国际航空客运、货运及邮运服务。	webmaster@csair.com	01055	www.csair.com	CNE000001FG0
104776	600030	中信证券	2015-12-31	中信证券股份有限公司	资本市场服务	J67	广东省深圳市福田区中心三路8号卓越时代广场(二期)北座	北京市朝阳区亮马桥路48号中信证券大厦,广东省深圳市福田区中心三路8号中信证券大厦	1995-10-25	2003-01-06	广东省	深圳市	518048	郑京	0755-23835383,010-60836030	0755-23835525,010-60836031	ir@citics.com		914403001017814402	报告期内公司无收购及出售资产、吸收合并事项	114.0581216027	22.5336866576	114.0580696027	22.5344986576	张佑君	主要从事证券承销和上市推荐证券自营买卖资产管理和证券代理买卖等业务。	12116908400	证券经纪(限山东省、河南省、浙江省天台县、浙江省苍南县以外区域)；证券投资咨询；与证券交易、证券投资活动有关的财务顾问；证券承销与保荐；证券自营；证券资产管理；融资融券；证券投资基金代销；为期货公司提供中间介绍业务；代销金融产品；股票期权做市。	ir@citics.com	06030	www.cs.ecitic.com	CNE000001DB6
104776	600030	中信证券	2016-12-31	中信证券股份有限公司	资本市场服务	J67	广东省深圳市福田区中心三路8号卓越时代广场(二期)北座	广东省深圳市福田区中心三路8号中信证券大厦;北京市朝阳区亮马桥路48号中信证券大厦	1995-10-25	2003-01-06	广东省	深圳市	518048,100026	郑京	0755-23835383,010-60836030	0755-23835525,010-60836031	ir@citics.com		914403001017814402	报告期内公司无收购及出售资产、吸收合并事项	114.0581216027	22.5336866576	114.0580696027	22.5344986576	张佑君	主要从事证券承销和上市推荐证券自营买卖资产管理和证券代理买卖等业务。	12116908400	证券经纪(限山东省、河南省、浙江省天台县、浙江省苍南县以外区域);证券投资咨询;与证券交易、证券投资活动有关的财务顾问;证券承销与保荐;证券自营;证券资产管理;融资融券;证券投资基金代销;为期货公司提供中间介绍业务;代销金融产品;股票期权做市。	ir@citics.com	06030	www.cs.ecitic.com	CNE000001DB6
104776	600030	中信证券	2017-12-31	中信证券股份有限公司	资本市场服务	J67	广东省深圳市福田区中心三路8号卓越时代广场(二期)北座	广东省深圳市福田区中心三路8号中信证券大厦;北京市朝阳区亮马桥路48号中信证券大厦	1995-10-25	2003-01-06	广东省	深圳市	518048,100026	郑京	0755-23835383,010-60836030	0755-23835525,010-60836031	ir@citics.com		914403001017814402	重大资产和股权出售:报告期内本公司全部转让了持有的12.7399%前海股权交易中心(深圳)有限公司的股权,交易对价人民币3.3亿元。	114.0581216027	22.5336866576	114.0580696027	22.5344986576	张佑君	主要从事证券承销和上市推荐证券自营买卖资产管理和证券代理买卖等业务。	1211690840	证券经纪(限山东省、河南省、浙江省天台县、浙江省苍南县以外区域);证券投资咨询;与证券交易、证券投资活动有关的财务顾问;证券承销与保荐;证券自营;证券资产管理;融资融券;证券投资基金代销;为期货公司提供中间介绍业务;代销金融产品;股票期权做市。	ir@citics.com	06030	www.cs.ecitic.com	CNE000001DB6
104776	600030	中信证券	2018-12-31	中信证券股份有限公司	资本市场服务	J67	广东省深圳市福田区中心三路8号卓越时代广场(二期)北座	广东省深圳市福田区中心三路8号中信证券大厦;北京市朝阳区亮马桥路48号中信证券大厦	1995-10-25	2003-01-06	广东省	深圳市	518048,100026	郑京	0755-23835383,010-60836030	0755-23835525,010-60836031	ir@citics.com		914403001017814402	报告期内公司无收购及出售资产、吸收合并事项	114.0581216027	22.5336686576	114.0580696027	22.5344986576	张佑君	主要从事证券承销和上市推荐证券自营买卖资产管理和证券代理买卖等业务。	12116908400	证券经纪(限山东省、河南省、浙江省天台县、浙江省苍南县以外区域);证券投资咨询;与证券交易、证券投资活动有关的财务顾问;证券承销与保荐;证券自营;证券资产管理;融资融券;证券投资基金代销;代销金融产品;股票期权做市。	ir@citics.com	06030	www.cs.ecitic.com	CNE000001DB6
104789	600031	三一重工	2015-12-31	三一重工股份有限公司	专用设备制造业	C35	北京市昌平区北清路8号6幢5楼	北京市昌平区北清路8号	2000-12-08	2003-07-03	北京市	北京市	102206	肖友良	010-60738888	010-60738868	xyl@sany.com.cn			报告期内公司无收购及出售资产、吸收合并事项	116.290658518	40.0920422411	116.290985518	40.0905342411	梁稳根	主营工程机械产品及配件的开发、生产和销售。	7616504037	混凝土机械、挖掘机械、起重机械、路面机械 及桩工机械的生产、销售与维修。	Sany@sany.com.cn		www.sanyhi.com	CNE000001F70
104789	600031	三一重工	2016-12-31	三一重工股份有限公司	专用设备制造业	C35	北京市昌平区北清路8号6栋5楼	北京市昌平区北清路8号	2000-12-08	2003-07-03	北京市	北京市	102206	肖友良	010-60738888	010-60738868	xyl@sany.com.cn	周利凯	91110000616800612P	重大资产和股权出售:2016年3月18日公司第五届董事会第二十五次会议及2016年3月30日召开的2016年第一次临时股东大会审议通过了《关于转让全资子公司部分股权暨关联交易的议案》;公司控股股东三一集团以现金的方式购买公司全资子公司深圳市三一科技有限公司81%的股权;2016年12月13日的公司第六届董事会第十次会议及2016年12月30日召开的2016年第三次临时股东大会审议通过了《三一重工股份有限公司关于转让全资子公司股权暨关联交易的议案》,公司将其所持有的北京市三一重机有限公司100%股权转让给深圳市三一科技有限公司;审议通过了《三一重工股份有限公司关于所属子公司三一汽车制造有限公司转让应收账款暨关联交易的议案》,公司所属子公司三一汽车制造有限公司将部分应收账款转让给公司控股股东三一集团有限公司;审议通过了《三一重工股份有限公司关于所属子公司三一汽车起重机械有限公司转让应收账款暨…	116.290658518	40.0920422411	116.290985518	40.0905342411	梁稳根	主营工程机械产品及配件的开发、生产和销售。	7657946000	混凝土机械、挖掘机械、起重机械、路面机械及桩工机械的生产、销售与维修。	Sany@sany.com.cn		www.sanyhi.com	CNE000001F70
104789	600031	三一重工	2017-12-31	三一重工股份有限公司	专用设备制造业	C35	北京市昌平区北清路8号6栋5楼	北京市昌平区北清路8号	2000-12-08	2003-07-03	北京市	北京市	102206	肖友良	010-60738888	010-60738868	xyl@sany.com.cn	周利凯	91110000616800612P	报告期内公司无收购及出售资产、吸收合并事项	116.290658518	40.0920422411	116.290985518	40.0905342411	梁稳根	主营工程机械产品及配件的开发、生产和销售。	7668210660	混凝土机械、挖掘机械、起重机械、路面机械及桩工机械的生产、销售与维修。	Sany@sany.com.cn		www.sanyhi.com	CNE000001F70
104789	600031	三一重工	2018-12-31	三一重工股份有限公司	专用设备制造业	C35	北京市昌平区北清路8号6栋5楼	北京市昌平区北清路8号	2000-12-08	2003-07-03	北京市	北京市	102206	肖友良	010-60738888	010-60738888	xyl@sany.com.cn	周利凯	91110000616800612P	报告期内公司无收购及出售资产、吸收合并事项	116.290658518	40.0920422411	116.290985518	40.0905342411	梁稳根	主营工程机械产品及配件的开发、生产和销售。	7800711422	混凝土机械、挖掘机械、起重机械、路面机械及桩工机械的生产、销售与维修。	Sany@sany.com.cn		www.sanyhi.com	CNE000001F70
105030	600036	招商银行	2015-12-31	招商银行股份有限公司	货币金融服务	J66	广东省深圳市福田区深南大道7088号	广东省深圳市福田区深南大道7088号	1987-03-31	2002-04-09	广东省	深圳市	518040	许世清	0755-83198888	0755-83195109	cmb@cmbchina.com	吴涧兵	9144030010001686XA	报告期内公司无收购及出售资产、吸收合并事项	114.022970122	22.5367548317	114.022203122	22.5371888317	李建红	经营吸收公众存款；发放短期、中期和长期贷款；办理国内外结算；办理票据贴现；发行金融债券等。	25219845601	提供公司及个人银行服务、从事资金业务，并提供资产管理及其他金融服务。	cmb@cmbchina.com	03968	www.cmbchina.com	CNE000001B33
105030	600036	招商银行	2016-12-31	招商银行股份有限公司	货币金融服务	J66	广东省深圳市福田区深南大道7088号	广东省深圳市福田区深南大道7088号	1987-03-31	2002-04-09	广东省	深圳市	518040	王良					9144030010001686XA	报告期内公司无收购及出售资产、吸收合并事项	114.022970122	22.5367548317	114.022203122	22.5371888317	李建红	经营吸收公众存款；发放短期、中期和长期贷款；办理国内外结算；办理票据贴现；发行金融债券等。	25220000000		cmb@cmbchina.com	03968	www.cmbchina.com	CNE000001B33
105030	600036	招商银行	2017-12-31	招商银行股份有限公司	货币金融服务	J66	广东省深圳市福田区深南大道7088号	广东省深圳市福田区深南大道7088号	1987-03-31	2002-04-09	广东省	深圳市	518040	王良	0755-83198888	0755-83195109	cmb@cmbchina.com	郑先炳	9144030010001686XA	报告期内公司无收购及出售资产、吸收合并事项	114.022970122	22.5367548317	114.022203122	22.5371888317	李建红	经营吸收公众存款；发放短期、中期和长期贷款；办理国内外结算；办理票据贴现；发行金融债券等。	25220000000	提供公司及个人银行服务、从事资金业务,并提供资产管理及其他金融服务。	cmb@cmbchina.com	03968	www.cmbchina.com	CNE000001B33
105030	600036	招商银行	2018-12-31	招商银行股份有限公司	货币金融服务	J66	广东省深圳市福田区深南大道7088号	广东省深圳市福田区深南大道7088号	1987-03-31	2002-04-09	广东省	深圳市	518040	王良	0755-83198888	0755-83195109	cmb@cmbchina.com	霍建军	9144030010001686XA	重大股权投资情况:2018年6月,本公司第十届董事会第二十六次会议审议通过了《关于向国家融资担保基金出资20亿元的议案》,同意本公司向国家融资担保基金出资20亿元,出资资金自2018年起分4年实缴到位。报告期内,本公司已完成5亿元出资。2018年7月,本公司全资子公司招银租赁对其全资子公司招银航空航运金融租赁有限公司增资45亿元。上述有关详情,请参阅本公司刊登在上海证券交易所、香港联交所和本公司网站的相关公告。	114.022970122	22.5367548317	114.022203122	22.5371888317	李建红	经营吸收公众存款；发放短期、中期和长期贷款；办理国内外结算；办理票据贴现；发行金融债券等。	25220000000	提供公司及个人银行服务、从事资金业务,并提供资产管理及其他金融服务。	cmb@cmbchina.com	03968	www.cmbchina.com	CNE000001B33
105031	600037	歌华有线	2016-12-31	北京歌华有线电视网络股份有限公司	电信、广播电视和卫星传输服务	I63	北京市海淀区花园北路35号(东门)	北京市东城区青龙胡同1号歌华大厦	1999-09-29	2001-02-08	北京市	北京市	100007	梁彦军	010-62364114	010-62364114	600037@bgctv.com.cn	于铁静	911100007002336492	报告期内公司无收购及出售资产、吸收合并事项	116.3670699728	39.9821505104	116.3692879728	39.9835825104	郭章鹏	广播电视网络的建设开发，经营管理和维护；广播电视节目收转、传送；广播电视网络信息服务；卫星广播电视节目广告的设计、制作等。	1391777884	主要负责全北京市有线广播电视网络的建设、管理和经营,并从事广播电视节目收转传送、视频点播、网络信息服务、基于有线电视网的互联网接入服务、互联网数据传送增值业务、国内IP电话业务和有线电视广告设计、制作、发布等业务。	bgctv@bgctv.com.cn		www.bgctv.com.cn	CNE0000016Y8
105032	600038	中直股份	2015-12-31	中航直升机股份有限公司	铁路、船舶、航空航天和其它运输设备制造业	C37	黑龙江省哈尔滨市高新技术开发区集中开发区34号楼	黑龙江省哈尔滨市平房区友协大街15号	1999-07-30	2000-12-18	黑龙江省	哈尔滨市	150066	顾韶辉	0451-86528350	0451-86524324	capitalcopter@avic.com			报告期内公司无收购及出售资产、吸收合并事项	126.6541323019	45.5898097997	126.692379148	45.7448542512	余枫	航空产品及零部件的开发、设计研制、生产和销售，航空科学 技术开发、咨询、服务，机电产品的开发、设计研制、生产和销售。	589476716	航空产品及零部件的开发、设计研制、生产和销售，航空科学技术开发、咨询、服务，机电产品的开发、设计研制、生产和销售以及经营进出口业务。	hfzqb600038@163.com			CNE0000015V6
105032	600038	中直股份	2016-12-31	中航直升机股份有限公司	铁路、船舶、航空航天和其它运输设备制造业	C37	黑龙江省哈尔滨市高新技术开发区集中开发区34号楼	黑龙江省哈尔滨市平房区友协大街15号	1999-07-30	2000-12-18	黑龙江省	哈尔滨市	150066	顾韶辉	0451-86528350,022-59800060	022-59800024	capitalcopter@163.com		912301997028500774	报告期内公司无收购及出售资产、吸收合并事项	126.6541323019	45.5898097997	126.692379148	45.7448542512	余枫	航空产品及零部件的开发、设计研制、生产和销售，航空科学 技术开发、咨询、服务，机电产品的开发、设计研制、生产和销售。	589476716	航空产品及零部件的开发、设计研制、生产和销售,航空科学技术开发、咨询、服务,机电产品的开发、设计研制、生产和销售以及经营进出口业务。	hfzqb600038@163.com			CNE0000015V6
105032	600038	中直股份	2017-12-31	中航直升机股份有限公司	铁路、船舶、航空航天和其它运输设备制造业	C37	黑龙江省哈尔滨市高新技术开发区集中开发区34号楼	黑龙江省哈尔滨市平房区友协大街15号	1999-07-30	2000-12-18	黑龙江省	哈尔滨市	150066	顾韶辉	0451-86528350,022-59800060	022-59800024	capitalcopter@163.com		912301997028500774	报告期内公司无收购及出售资产、吸收合并事项	126.6541323019	45.5898097997	126.692379148	45.7448542512	曲景文	航空产品及零部件的开发、设计研制、生产和销售，航空科学 技术开发、咨询、服务，机电产品的开发、设计研制、生产和销售。	589476716	航空产品及零部件的开发、设计、研制、生产、销售,航空科学技术开发、咨询、服务,机电产品的开发、设计研制、生产和销售以及经营进出口业务。	hfzqb600038@163.com		capitalcopter@avic.com	CNE0000015V6
105032	600038	中直股份	2018-12-31	中航直升机股份有限公司	铁路、船舶、航空航天和其它运输设备制造业	C37	黑龙江省哈尔滨市高新技术开发区集中开发区34号楼	黑龙江省哈尔滨市平房区友协大街15号	1999-07-30	2000-12-18	黑龙江省	哈尔滨市	150066	顾韶辉	0451-86528350,022-59800060	022-59800024	capitalcopter@163.com		912301997028500774	报告期内公司无收购及出售资产、吸收合并事项	126.6541323019	45.5898097997	126.692379148	45.7448542512	曲景文	航空产品及零部件的开发、设计研制、生产和销售，航空科学 技术开发、咨询、服务，机电产品的开发、设计研制、生产和销售。	337350000	航空产品及零部件的开发、设计、研制、生产、销售,航空科学技术开发、咨询、服务,机电产品的开发、设计研制、生产和销售以及经营进出口业务。	hfzqb600038@163.com			CNE0000015V6
104897	600048	保利地产	2015-12-31	保利房地产(集团)股份有限公司	房地产业	K70	广东省广州市海珠区阅江中路688号保利国际广场29-33层	广东省广州市海珠区阅江中路688号保利国际广场29-33层	1992-09-14	2006-07-31	广东省	广州市	510308	黄海	020-89898833	020-89898666-8831	stock@polycn.com	尹超		报告期内公司无收购及出售资产、吸收合并事项	113.3729290008	23.1034574834	113.3723890008	23.1027654834	宋广菊	本公司的主营业务是房地产开发、销售、租赁及其物业管理。	10756715193	房地产业（依法须经批准的项目，经相关部门批准后方可开展经营活动）	zpjy600084@163.com		www.polycn.com;www.gzpoly.com	CNE000001ND1
104897	600048	保利地产	2016-12-31	保利房地产(集团)股份有限公司	房地产业	K70	广东省广州市海珠区阅江中路688号保利国际广场30-33层	广东省广州市海珠区阅江中路688号保利国际广场北塔30-33层	1992-09-14	2006-07-31	广东省	广州市	510308	黄海	020-89898833	020-89898666-8831	stock@polycn.com	尹超	91440101741884392G	报告期内公司无收购及出售资产、吸收合并事项	113.3729290008	23.1034574834	113.3723890008	23.1027654834	宋广菊	本公司的主营业务是房地产开发、销售、租赁及其物业管理。	11857812078	房地产业(依法须经批准的项目,经相关部门批准后方可开展经营活动)。	zpjy600084@163.com		www.polycn.com;www.gzpoly.com	CNE000001ND1
104897	600048	保利地产	2017-12-31	保利房地产(集团)股份有限公司	房地产业	K70	广东省广州市海珠区阅江中路688号保利国际广场30-33层	广东省广州市海珠区阅江中路688号保利国际广场北塔30-33层	1992-09-14	2006-07-31	广东省	广州市	510308	黄海	020-89898833	020-89898666-8831	stock@polycn.com	尹超	91440101741884392G	报告期内公司无收购及出售资产、吸收合并事项	113.3729290008	23.1034574834	113.3723890008	23.1027654834	宋广菊	本公司的主营业务是房地产开发、销售、租赁及其物业管理。	11858441061	房地产业(依法须经批准的项目,经相关部门批准后方可开展经营活动)。	zpjy600084@163.com		www.polycn.com；www.gzpoly.com	CNE000001ND1
104897	600048	保利地产	2018-12-31	保利发展控股集团股份有限公司	房地产业	K70	广东省广州市海珠区阅江中路688号保利国际广场30-33层	广东省广州市海珠区阅江中路688号保利国际广场北塔30-33层	1992-09-14	2006-07-31	广东省	广州市	510308	黄海	020-89898833	020-89898666-8831	stock@polycn.com	尹超	91440101741884392G	报告期内公司无收购及出售资产、吸收合并事项	113.3724260008	23.1028434834	113.3723890008	23.1027654834	宋广菊	本公司的主营业务是房地产开发、销售、租赁及其物业管理。	11895029098	房地产业(依法须经批准的项目,经相关部门批准后方可开展经营活动)。	zpjy600084@163.com		www.polycn.com;www.gzpoly.com	CNE000001ND1
104898	600050	中国联通	2015-12-31	中国联合网络通信股份有限公司	电信、广播电视和卫星传输服务	I63	上海市长宁区长宁路1033号29楼	上海市长宁区长宁路1033号29楼	2001-12-31	2002-10-09	上海市	上海市	200050	李超	021-52732228	021-52732220	chaoli@chinaunicom-a.com	杨九英		重大资产和股权出售：于2015年10 月14日，联通运营公司和联通新时空与中国移动、中国电信、中国国新和铁塔公司就出售铁塔资产给铁塔公司的事项签署转让协议。根据转让协议，本集团、中国移动及中国电信将出售铁塔资产给铁塔公司以换取铁塔公司发行的股份及现金对价。此外，中国国新将以现金认购铁塔公司股份。出售铁塔资产于2015年10月31日完成（“交割日”）。本集团出售铁塔资产的交易对价最终确定为人民币 546.58 亿元。铁塔公司以发行价每股人民币 1.00元向中国联通运营公司配发33,335,836,822 股铁塔公司股份（“对价股份”），其余交易对价约人民币213.22亿元以现金支付（“现金对价”）。铁塔公司已于2016年2 月支付第一笔人民币30.00 亿元的现金对价，剩余现金对价将于 2017年12 月31日前付清。 出售铁塔资产被确认为资产出售交易。由于联通运营公司持有铁塔公司股本的2…	121.4171108816	31.2178981901	121.4170418816	31.2180501901	王晓初	仅限于通过联通BVI公司持有联通红筹公司的股权，而不直接经营任何其他业务。本公司通过控股的联通BVI公司持有联通红筹公司77.41 ％的股份，对联通红筹公司及其全资拥有的联通运营公司具有实质性控制权。联通运营公司经营移动通信、国际国内长途通信、数据通信和互联网等综合电信业务。	21196596395	国（境）内外电信行业的投资	ir@chinaunicom-a.com		www.chinaunicom-a.com	CNE000001CS2
104898	600050	中国联通	2016-12-31	中国联合网络通信股份有限公司	电信、广播电视和卫星传输服务	I63	上海市长宁区长宁路1033号25楼	北京市西城区金融大街21号	2001-12-31	2002-10-09	上海市	上海市	100033	王霞	010-66259179	010-66259544	dongmi@chinaunicom.cn		91310000710929383P	报告期内公司无收购及出售资产、吸收合并事项	116.3578013807	39.9150224338	121.4170418816	31.2180501901	王晓初	仅限于通过联通BVI公司持有联通红筹公司的股权，而不直接经营任何其他业务。本公司通过控股的联通BVI公司持有联通红筹公司77.41 ％的股份，对联通红筹公司及其全资拥有的联通运营公司具有实质性控制权。联通运营公司经营移动通信、国际国内长途通信、数据通信和互联网等综合电信业务。	21196596395	为在中国境内提供移动和固网语音及相关增值服务、宽带及其他互联网相关服务、信息通信技术服务以及商务及数据通信服务。GSM移动语音、WCDMA移动语音、LTEFDD移动语音、TD-LTE移动语音,以及相关增值服务以下称为"移动业务"。除移动业务外,上述其他业务以外统称为"固网业务"。	ir@chinaunicom.cn		www.chinaunicom-a.com	CNE000001CS2
104898	600050	中国联通	2017-12-31	中国联合网络通信股份有限公司	电信、广播电视和卫星传输服务	I63	北京市西城区金融大街21号4楼	北京市西城区金融大街21号	2001-12-31	2002-10-09	北京市	北京市	100033	王霞	010-66259179	010-66259544	dongmi@chinaunicom.cn	黄学谦	91310000710929383P	报告期内公司无收购及出售资产、吸收合并事项	116.3578013807	39.9150224338	116.3577219407	39.9146024197	王晓初	仅限于通过联通BVI公司持有联通红筹公司的股权，而不直接经营任何其他业务。本公司通过控股的联通BVI公司持有联通红筹公司77.41 ％的股份，对联通红筹公司及其全资拥有的联通运营公司具有实质性控制权。联通运营公司经营移动通信、国际国内长途通信、数据通信和互联网等综合电信业务。	30233950687	在中国境内提供语音通话、增值服务、宽带及移动数据服务、数据及其他互联网应用以及电路及网元租赁服务等。	ir@chinaunicom.cn		www.chinaunicom-a.com	CNE000001CS2
104898	600050	中国联通	2018-12-31	中国联合网络通信股份有限公司	电信、广播电视和卫星传输服务	I63	北京市西城区金融大街21号4楼	北京市西城区金融大街21号	2001-12-31	2002-10-09	北京市	北京市	100033	朱可炳	010-66259179	010-66259544	dongmi@chinaunicom.cn	黄学谦	91310000710929383P	报告期内公司无收购及出售资产、吸收合并事项	116.3578013807	39.9150224338	116.3577219407	39.9146024197	王晓初	仅限于通过联通BVI公司持有联通红筹公司的股权，而不直接经营任何其他业务。本公司通过控股的联通BVI公司持有联通红筹公司77.41 ％的股份，对联通红筹公司及其全资拥有的联通运营公司具有实质性控制权。联通运营公司经营移动通信、国际国内长途通信、数据通信和互联网等综合电信业务。	31027811687	中国境内提供语音通话、增值服务、宽带及移动数据服务、数据及其他互联网应用、电路及网元服务等。	ir@chinaunicom.cn		www.chinaunicom-a.com	CNE000001CS2
106026	600060	海信电器	2015-12-31	青岛海信电器股份有限公司	计算机、通信和其他电子设备制造业	C39	山东省青岛市经济技术开发区前湾港路218号	山东省青岛市经济技术开发区前湾港路218号	1997-04-17	1997-04-22	山东省	青岛市	266555	舒鹏	0532-83889556	0532-83889556	zqb@hisense.com		9137020026462882XW	报告期内公司无收购及出售资产、吸收合并事项	120.1607843641	36.0052313961	120.1608568397	36.0022461349	刘洪新	电视机等家用电器。	1308481222	电视机的研发、生产和销售业务。	zqb@hisense.com		www.hisense.com	CNE000000PF3
106026	600060	海信电器	2016-12-31	青岛海信电器股份有限公司	计算机、通信和其他电子设备制造业	C39	山东省青岛市经济技术开发区前湾港路218号	山东省青岛市经济技术开发区前湾港路218号	1997-04-17	1997-04-22	山东省	青岛市	266555	王东波	0532-83889556	0532-83889556	zqb@hisense.com		9137020026462882XW	报告期内公司无收购及出售资产、吸收合并事项	120.1607843641	36.0052313961	120.1608568397	36.0022461349	刘洪新	电视机等家用电器。	1308481222	电视机的研发、生产和销售业务。	zqb@hisense.com		www.hisense.com	CNE000000PF3
106015	600061	国投资本	2016-12-31	国投安信股份有限公司	资本市场服务	J67	上海市自由贸易试验区北张家浜路128号204-3	北京市西城区阜成门北大街2号国投金融大厦19层	1997-05-13	1997-05-19	上海市	上海市	100034	李樱	010-83325163	010-83325148	600061@essence.com.cn	关国川	91310000132284105Y	重大资产和股权出售:安信证券挂牌转让前海股权交易中心(深圳)有限公司8.4933%股权。公司全资子公司安信证券于2016年2月3日、2016年2月19日分别召开第三届董事会第三十二次会议、2016年第一次临时股东大会,审议通过了关于转让所持有的前海股权交易中心(深圳)有限公司8.4933%股权的议案。报告期内,安信证券按照相关规定,聘请了会计师、资产评估师对前海股交中心截止2015年12月31日的资产进行了审计和评估,并履行了资产评估备案及进场挂牌等程序。2016年12月13日,本次拟转让股权在上海联合产权交易所公开挂牌,挂牌至2017年1月18日期满。挂牌期满后,本次转让征得一家意向受让方"深圳海润八号投资合伙企业(有限合伙)"(以下简称"深圳海润")。2017年2月20日,安信证券与深圳海润签署了《上海市产权交易合同》,转让价格为2.2亿元。2017年3月13日,安信证券收到上述转让…	116.3578208307	39.930812448	121.5245263207	31.2169384249	施洪祥	证券服务业。	3694151713	投资管理,企业管理,资产管理,商务信息咨询服务,实业投资,从事货物及技术的进出口业务,计算机软硬件开发,物业管理。[依法须经批准的项目,经相关部门批准后方可开展经营活动]。	600061@essence.com.cn		www.sdicessence.com.cn	CNE000000Q11
106015	600061	国投资本	2017-12-31	国投资本股份有限公司	资本市场服务	J67	上海市自由贸易试验区北张家浜路128号204-3、204-4、204-5室	北京市西城区阜成门北大街2号国投金融大厦19层	1997-05-13	1997-05-19	上海市	上海市	100034	李樱	010-83325163	010-83325148	600061@essence.com.cn	关国川	91310000132284105Y	重大资产和股权出售:公司全资子公司安信证券挂牌转让前海股权交易中心(深圳)有限公司8.4933%股权。安信证券于2016年2月3日、2016年2月19日分别召开第三届董事会第三十二次会议、2016年第一次临时股东大会,审议通过了关于转让所持有的前海股权交易中心(深圳)有限公司8.4933%股权的议案。报告期内,本次转让股权在上海联合产权交易所公开挂牌,挂牌至2017年1月18日,挂牌期满后,共征得一家意向受让方“深圳海润八号投资合伙企业(有限合伙)”(简称“深圳海润”)。2017年2月20日,安信证券与深圳海润签署了本次股权转让的《上海市产权交易合同》,转让价格为2.20亿元。2017年3月13日,安信证券收到上述转让价款及其利息合计220,042,777.78元。	116.3578208307	39.930812448	121.5245263207	31.2169384249	叶柏寿	证券服务业。	4227129727	投资管理,企业管理,资产管理,商务信息咨询服务,实业投资,从事货物及技术的进出口业务,计算机软硬件开发,物业管理。[依法须经批准的项目,经相关部门批准后方可开展经营活动]。	600061@essence.com.cn		www.sdiccapital.com	CNE000000Q11
106015	600061	国投资本	2018-12-31	国投资本股份有限公司	资本市场服务	J67	上海市自由贸易试验区北张家浜路128号204-3、204-4、204-5室	北京市西城区阜成门北大街2号国投金融大厦	1997-05-13	1997-05-19	上海市	上海市	100034	李樱	010-83325163	010-83325148	600061@sdic.com.cn	林莉尔	91310000132284105Y	报告期内公司无收购及出售资产、吸收合并事项	116.3573968307	39.930740448	121.5245263207	31.2169384249	叶柏寿	证券服务业。	4227129727	投资管理,企业管理,资产管理,商务信息咨询服务,实业投资,从事货物及技术的进出口业务,计算机软硬件开发,物业管理。[依法须经批准的项目,经相关部门批准后方可开展经营活动]。	600061@sdic.com.cn		www.sdiccapital.com	CNE000000Q11
105779	600066	宇通客车	2015-12-31	郑州宇通客车股份有限公司	汽车制造业	C36	河南省郑州市管城区宇通路	河南省郑州市管城区宇通路宇通工业园	1993-02-28	1997-05-08	河南省	郑州市	450016	于莉	0371-66718281	0371-66899399-1766	sbd@yutong.com	赵永	91410000170001401D	报告期内公司无收购及出售资产、吸收合并事项	113.6883856321	34.6883376292	113.7001244854	34.6777219435	汤玉祥	大中型客车及其附件的生产和销售。	2213939223	客车的生产和销售、提供汽车维修劳务以及市县际定 线旅游客运服务。	info@yutong.com		www.yutong.com	CNE000000PY4
105779	600066	宇通客车	2016-12-31	郑州宇通客车股份有限公司	汽车制造业	C36	河南省郑州市管城区宇通路	河南省郑州市管城区宇通路宇通工业园	1993-02-28	1997-05-08	河南省	郑州市	450016	于莉	0371-66718281	0371-66899399-1766	sbd@yutong.com		91410000170001401D	报告期内公司无收购及出售资产、吸收合并事项	113.6883856321	34.6883376292	113.7001244854	34.6777219435	汤玉祥	大中型客车及其附件的生产和销售。	2213939223	客车的生产和销售、提供汽车维修劳务以及市县际定线旅游客运服务。	info@yutong.com		www.yutong.com	CNE000000PY4
105779	600066	宇通客车	2017-12-31	郑州宇通客车股份有限公司	汽车制造业	C36	河南省郑州市管城区宇通路	河南省郑州市管城区宇通路宇通工业园	1993-02-28	1997-05-08	河南省	郑州市	450016	于莉	0371-66718281	0371-66899399-1766	sbd@yutong.com	王东新	91410000170001401D	报告期内公司无收购及出售资产、吸收合并事项	113.6883856321	34.6883376292	113.7001244854	34.6777219435	汤玉祥	大中型客车及其附件的生产和销售。	2213939223	客车的生产和销售、提供汽车维修劳务以及市县际定线旅游客运服务。	info@yutong.com		www.yutong.com	CNE000000PY4
105779	600066	宇通客车	2018-12-31	郑州宇通客车股份有限公司	汽车制造业	C36	河南省郑州市管城区宇通路	河南省郑州市管城区宇通路宇通工业园	1993-02-28	1997-05-08	河南省	郑州市	450016	于莉	0371-66718281	0371-66899399-1766	ir@yutong.com	王东新	91410000170001401D	报告期内公司无收购及出售资产、吸收合并事项	113.6883856321	34.6883376292	113.7001244854	34.6777219435	汤玉祥	大中型客车及其附件的生产和销售。	2213939223	客车的生产和销售、提供汽车维修劳务以及市县际定线旅游客运服务。	info@yutong.com		www.yutong.com	CNE000000PY4
105796	600068	葛洲坝	2015-12-31	中国葛洲坝集团股份有限公司	土木工程建筑业	E48	湖北省武汉市解放大道558号葛洲坝大酒店	湖北省武汉市硚口区解放大道558号葛洲坝大厦	1997-05-21	1997-05-26	湖北省	武汉市	430033	彭立权	027-59270353	027-59270357	gzb@cggc.cn	丁贤云		报告期内公司无收购及出售资产、吸收合并事项	114.251298771	30.5766872957	114.251436771	30.5763312957	聂凯	承包各类型水利水电工程等的勘测、设计、施工和安装及水泥的生产销售。	4604777412	按国家核准的资质等级范围、全过程或分项承包国内外、境内国际招标的水利水电、公路、铁路、市政公用、港口与航道、房屋建筑工程的施工总承包、工程总承包和项目管理业务；及起重设备安装工程专业承包、堤防、桥梁、隧道、机场、公路路基工程、地质灾害治理工程、输电线路、机电设备制作安装和其他建筑工程的勘察设计及施工安装，船舶制造修理，低压开关柜制造，电力工程施工；上述工程所需材料、设备的出口；对外派遣本行业工程、生产的劳务人员；生产销售和出口水泥；经营和代理本系统机械、电器设备等商品和技术进出口业务；建筑安装设备的购销和租赁；房地产开发、建设项目及工程的投资开发；房屋租赁；经营本企业自产产品及技术的进出口业务和本企业所需的机械设备、零配件、原辅材料及技术的进出口业务，但国家限定公司经营或禁止进出口的商品及技术除外；煤炭批发经营，金属结构压力容器制作安装，汽车改装与维修，运输及旅游服务（限分支机构持证经营…	gzb@cggc.cn		www.cggc.cn	CNE000000QF1
105796	600068	葛洲坝	2016-12-31	葛洲坝集团股份有限公司	土木工程建筑业	E48	湖北省武汉市解放大道558号葛洲坝大酒店	湖北省武汉市硚口区解放大道558号葛洲坝大厦	1997-05-21	1997-05-26	湖北省	武汉市	430033	彭立权	027-59270353	027-59270357	gzb@cggc.cn	丁贤云	914200006155710107	报告期内公司无收购及出售资产、吸收合并事项	114.251298771	30.5766872957	114.251436771	30.5763312957	聂凯	承包各类型水利水电工程等的勘测、设计、施工和安装及水泥的生产销售。	4604777412	按国家核准的资质等级范围、全过程或分项承包国内外、境内国际招标的水利水电、公路、铁路、市政公用、港口与航道、房屋建筑工程的施工总承包、工程总承包和项目管理业务;及起重设备安装工程专业承包、堤防、桥梁、隧道、机场、公路路基工程、地质灾害治理工程、输电线路、机电设备制作安装和其他建筑工程的勘察设计及施工安装,船舶制造修理,低压开关柜制造,电力工程施工;上述工程所需材料、设备的出口;对外派遣本行业工程、生产的劳务人员;生产销售和出口水泥;经营和代理本系统机械、电器设备等商品和技术进出口业务;建筑安装设备的购销和租赁;房地产开发、建设项目及工程的投资开发;房屋租赁;经营本企业自产产品及技术的进出口业务和本企业所需的机械设备、零配件、原辅材料及技术的进出口业务,但国家限定公司经营或禁止进出口的商品及技术除外;煤炭批发经营,金属结构压力容器制作安装,汽车改装与维修,运输及旅游服务(限分支机构持证经营…	gzb@cggc.cn		www.cggc.cn	CNE000000QF1
105796	600068	葛洲坝	2017-12-31	中国葛洲坝集团股份有限公司	土木工程建筑业	E48	湖北省武汉市解放大道558号葛洲坝大酒店	湖北省武汉市硚口区解放大道558号葛洲坝大厦	1997-05-21	1997-05-26	湖北省	武汉市	430033	彭立权	027-59270353	027-59270357	gzb@cggc.cn	丁贤云	914200006155710107	重大资产和股权出售:2017年,公司处置了持有的以公允价值计量且其变动计入其他综合收益的上市公司长江电力、交通银行股票,收到转让价款76,477.98万元,确认投资收益71,148.22万元。	114.251298771	30.5766872957	114.251436771	30.5763312957	聂凯	承包各类型水利水电工程等的勘测、设计、施工和安装及水泥的生产销售。	4604777412	按国家核准的资质等级范围、全过程或分项承包国内外、境内国际招标的水利水电、公路、铁路、市政公用、港口与航道、房屋建筑工程的施工总承包、工程总承包和项目管理业务;及起重设备安装工程专业承包、堤防、桥梁、隧道、机场、公路路基工程、地质灾害治理工程、输电线路、机电设备制作安装和其他建筑工程的勘察设计及施工安装,船舶制造修理,低压开关柜制造,电力工程施工;上述工程所需材料、设备的出口;对外派遣本行业工程、生产的劳务人员;公路、铁路、水务、水电、城市公用设施投资、建设和运营管理;分布式能源系统、储能、储热、制冷、发电机组、三维数字设备、机电一体化设备及相关产品的研发、制造、销售与服务;环保业务;生产销售和出口水泥;经营和代理本系统机械、电器设备等商品和技术进出口业务;建筑安装设备的购销和租赁;房地产开发、建设项目及工程的投资开发;房屋租赁;经营本企业自产产品及技术的进出口业务和本企业所需的机械设备…	gzb@cggc.cn		www.cggc.cn	CNE000000QF1
105796	600068	葛洲坝	2018-12-31	中国葛洲坝集团股份有限公司	土木工程建筑业	E48	湖北省武汉市解放大道558号葛洲坝大酒店	湖北省武汉市硚口区解放大道558号葛洲坝大厦	1997-05-21	1997-05-26	湖北省	武汉市	430033	彭立权	027-59270353	027-59270357	gzb@cggc.cn	丁贤云	914200006155710107	报告期内公司无收购及出售资产、吸收合并事项	114.251298771	30.5766872957	114.251436771	30.5763312957	陈晓华	承包各类型水利水电工程等的勘测、设计、施工和安装及水泥的生产销售。	4604777412	按国家核准的资质等级范围、全过程或分项承包国内外、境内国际招标的水利水电、公路、铁路、市政公用、港口与航道、房屋建筑工程的施工总承包、工程总承包和项目管理业务;及起重设备安装工程专业承包、堤防、桥梁、隧道、机场、公路路基工程、地质灾害治理工程、输电线路、机电设备制作安装和其他建筑工程的勘察设计及施工安装,船舶制造修理,低压开关柜制造,电力工程施工;上述工程所需材料、设备的出口;对外派遣本行业工程、生产的劳务人员;公路、铁路、水务、水电、城市公用设施投资、建设和运营管理;分布式能源系统、储能、储热、制冷、发电机组、三维数字设备、机电一体化设备及相关产品的研发、制造、销售与服务;环保业务;生产销售和出口水泥;经营和代理本系统机械、电器设备等商品和技术进出口业务;建筑安装设备的购销和租赁;房地产开发、建设项目及工程的投资开发;房屋租赁;经营本企业自产产品及技术的进出口业务和本企业所需的机械设备…	gzb@cggc.cn		www.cggc.cn	CNE000000QF1
105933	600074	*ST保千	2016-12-31	江苏保千里视像科技集团股份有限公司	计算机、通信和其他电子设备制造业	C39	江苏省南京市经济技术开发区兴智路兴智科技园B栋21层	广东省深圳市南山区登良路23号汉京国际大厦16层	1997-06-18	1997-06-23	江苏省	南京市	518054	周皓琳	0755-26009465	0755-26008476	stock@protruly.com.cn	张宁	91320192608966137J	报告期内公司无收购及出售资产、吸收合并事项	113.9243367083	22.5116793659	118.8778789718	32.1370598058	庄敏	生产、销售双向拉伸聚酯薄膜等。	2437886049	电子摄像技术、计算机软硬件研发、生产、销售、租赁;项目投资;物业管理服务;自营和代理各类商品及技术的进出口业务(国家限定企业经营或禁止进出口的商品和技术除外)。	stock@protruly.com.cn		www.protruly.com.cn	CNE000000RC6
105129	600085	同仁堂	2015-12-31	北京同仁堂股份有限公司	医药制造业	C27	北京市北京经济技术开发区西环南路8号	北京市崇文区东兴隆街52号,北京市崇文门外大街42号	1997-06-18	1997-06-25	北京市	北京市	100062	贾泽涛	010-67020018	010-67020018	jiazetao@tongrentang.com	李泉琳	911100006336462669	报告期内公司无收购及出售资产、吸收合并事项	116.4193182482	39.8958330952	116.5261196963	39.7700854364	高振坤	制药、中药生产销售。	1371470262	制造、加工中成药制剂、化妆品、酒剂、涂膜剂、软胶囊剂、硬胶囊剂、保健酒、加工鹿、乌鸡产品、营养液制造(不含医药作用的营养液)。经营中成药、中药材、西药制剂、生化药品、保健食品、定型包装食品、酒、医疗器械、医疗保健用品。零售中药饮片、保健食品、定型包装食品(含乳冷食品)、图书、百货。中医科、内科专业、外科专业、妇产科专业、儿科专业、皮肤科专业、老年病科专业诊疗。技术咨询、技术服务、技术开发、技术转让、技术培训、劳务服务。药用动植物的饲养、种植;养殖梅花鹿、乌骨鸡、麝、马鹿。中西药广告设计制作。危险货物运输(3类)、普通货运。物业管理和供暖服务。自营和代理各类商品及技术的进出口业务,但国家限定公司经营或禁止进出口的商品及技术除外	tongrentang@tongrentang.com		www.tongrentanggf.com	CNE000000R69
105129	600085	同仁堂	2016-12-31	北京同仁堂股份有限公司	医药制造业	C27	北京市经济技术开发区西环南路8号	北京市东城区东兴隆街52号,北京市崇文门外大街42号	1997-06-18	1997-06-25	北京市	北京市	100062	贾泽涛	010-67020018	010-67020018	jiazetao@tongrentang.com	李泉琳	911100006336462669	报告期内公司无收购及出售资产、吸收合并事项	116.5254556963	39.7695864364	116.5261196963	39.7700854364	高振坤	制药、中药生产销售。	1371470262	制造、加工中成药制剂、化妆品、酒剂、涂膜剂、软胶囊剂、硬胶囊剂、保健酒、加工鹿、乌鸡产品、营养液制造(不含医药作用的营养液)。经营中成药、中药材、西药制剂、生化药品、保健食品、定型包装食品、酒、医疗器械、医疗保健用品。零售中药饮片、保健食品、定型包装食品(含乳冷食品)、图书、百货。中医科、内科专业、外科专业、妇产科专业、儿科专业、皮肤科专业、老年病科专业诊疗。技术咨询、技术服务、技术开发、技术转让、技术培训、劳务服务。药用动植物的饲养、种植;养殖梅花鹿、乌骨鸡、麝、马鹿。中西药广告设计制作。危险货物运输(3类)、普通货运、出租办公用房、出租商业用房。物业管理和供热服务。自营和代理各类商品及技术的进出口业务,但国家限定公司经营或禁止进出口的商品及技术除外。	tongrentang@tongrentang.com		www.tongrentanggf.com	CNE000000R69
105129	600085	同仁堂	2017-12-31	北京同仁堂股份有限公司	医药制造业	C27	北京市经济技术开发区西环南路8号	北京市东城区东兴隆街52号;北京市崇文门外大街42号	1997-06-18	1997-06-25	北京市	北京市	100062	贾泽涛	010-67020018	010-67020018	jiazetao@tongrentang.com	李泉琳	911100006336462669	报告期内公司无收购及出售资产、吸收合并事项	116.5254556963	39.7695864364	116.5261196963	39.7700854364	高振坤	制药、中药生产销售。	1371470262	制造、加工中成药制剂、化妆品;经营中成药、西药制剂、生化药品;普通货运;出租办公用房;出租商业用房	tongrentang@tongrentang.com		www.tongrentanggf.com	CNE000000R69
105129	600085	同仁堂	2018-12-31	北京同仁堂股份有限公司	医药制造业	C27	北京市经济技术开发区西环南路8号	北京市东城区崇文门外大街42号	1997-06-18	1997-06-25	北京市	北京市	100062	贾泽涛	010-67179780	010-67152230	jiazetao@tongrentang.com	李泉琳	911100006336462669	报告期内公司无收购及出售资产、吸收合并事项	116.4193182482	39.8958330952	116.5261196963	39.7700854364	高振坤	制药、中药生产销售。	1371470262	制造、加工中成药制剂、化妆品;经营中成药、西药制剂、生化药品;普通货运;出租办公用房;出租商业用房;以下项目仅限分公司经营:销售定型包装食品(含乳冷食品)、保健食品、中药材、医疗器械、医疗保健用品;零售中药饮片、图书;制造酒剂、涂膜剂、软胶囊剂、硬胶囊剂、保健酒、营养液(不含医药作用的营养液);鹿、乌鸡产品的加工;中医科、内科专业、外科专业、妇产科专业、儿科专业、皮肤科专业、老年病科专业诊疗;危险货物运输(3类);技术咨询、技术服务、技术开发、技术转让、技术培训;药用动植物的饲养、种植;自营和代理各类商品及技术的进出口业务,但国家限定公司经营或禁止进出口的商品及技术除外;零售百货;中西药广告设计;劳务服务;以下项目仅限分公司经营:养殖梅花鹿、乌骨鸡、麝、马鹿;物业服务和供热服务。	tongrentang@tongrentang.com		www.tongrentanggf.com	CNE000000R69
105782	600089	特变电工	2015-12-31	特变电工股份有限公司	电气机械及器材制造业	C38	新疆维吾尔自治区昌吉市延安南路52号	新疆维吾尔自治区昌吉市北京南路189号	1993-02-26	1997-06-18	新疆维吾尔自治区	昌吉市	831100	郭俊香	0994-6508000	0994-2723615	guojunxiang@tbea.com	焦海华		重大资产和股权出售： 资产或股权收购、出售发生的关联交易： 已在临时公告披露，但有后续实施的进展或变化的事项： 事项概述：2015年3月12日公司2015年第二次临时董事会会议审议通了《公司购买新疆特变电工集团有限公司土地使用权及地面建筑物、附着物的关联交易的议案》。公司购买第一大股东该土地使用权及地面建筑物、附着物,用于新疆±1100kV变压器研发制造基地项目建设；2015年3月30日公司2015年第三次临时董事会会议审议通过了《关于公司控股子公司鲁缆公司向特变房产转让康新置业股权的关联交易议案》,为了增加公司控股子公司特变电工山东鲁能泰山电缆有限公司(以下简称鲁缆公司)的营运资金,减少非经营性资金占用,鲁缆公司将其持有的全资子公司新泰市康新置业有限公司全部股权转让给公司第一大股东的子公司新疆特变电工房地产开发有限责任公司。 进展情况：详见2015年3月13日《上海证券报》、《中国证券…	87.2743922974	43.9674815706	87.2834637306	43.965989262	张新	变压器、电线电缆及辅助设备的制造和销售。	3249053686	变压器、电抗器、互感器、电线电缆及其他电气机械器材的制造、销 售、检修、安装及回收；机械设备、电子产品的生产销售；五金交电的销售；硅及相关产品 的制造、研发及相关技术咨询；矿产品的加工；新能源技术、建筑环保技术、水资源利用技 术及相关工程项目的研发及咨询；太阳能系统组配件、环保设备的制造、安装及相关技术咨 询；太阳能光伏离网和并网及风光互补系统、柴油机光互补系统及其他新能源系列工程的设 计、建设、安装及维护；太阳能集中供热工程的设计、安装；太阳能光热产品的设计、制造； 承包境外机电行业输变电、水电、火电站工程和国内、国际招标工程，上述境外工程所属的 设备、材料出口，对外派遣实施上述境外工程所需的劳务人员；进口钢材经营；一般货物和 技术的进出口；电力工程施工总承包；房屋出租；纯净水的生产（限下属分支机构经营）； 水电暖安装；货物运输代理服务及相关咨询；花草培育、销售。主要产品是：变压器及电…	tbeazqb@tbea.com		www.tbea.com	CNE000000RB8
105782	600089	特变电工	2016-12-31	特变电工股份有限公司	电气机械及器材制造业	C38	新疆维吾尔自治区昌吉市北京南路189号	新疆维吾尔自治区昌吉市北京南路189号	1993-02-26	1997-06-18	新疆维吾尔自治区	昌吉市	831100	郭俊香	0994-6508000	0994-2723615	guojunxiang@tbea.com	焦海华	91650000299201121Q	报告期内公司无收购及出售资产、吸收合并事项	87.2743922974	43.9674815706	87.2713563274	43.9776678927	张新	变压器、电线电缆及辅助设备的制造和销售。	3243448886	变压器、电抗器、互感器、电线电缆及其他电气机械器材的制造、销售、检修、安装及回收;机械设备、电子产品的生产销售;五金交电的销售;硅及相关产品的制造、研发及相关技术咨询;矿产品的加工;新能源技术、建筑环保技术、水资源利用技术及相关工程项目的研发及咨询;太阳能系统组配件、环保设备的制造、安装及相关技术咨询;太阳能光伏离网和并网及风光互补系统、柴油机光互补系统及其他新能源系列工程的设计、建设、安装及维护;太阳能集中供热工程的设计、安装;太阳能光热产品的设计、制造;承包境外机电行业输变电、水电、火电站工程和国内、国际招标工程,上述境外工程所属的设备、材料出口,对外派遣实施上述境外工程所需的劳务人员;进口钢材经营;一般货物和技术的进出口;电力工程施工总承包;房屋出租;水的生产和供应(限下属分支机构经营);电力供应;热力生产和供应;货物运输代理服务及相关咨询;花草培育、销售。主要产品是:变压器及电抗…	tbeazqb@tbea.com		www.tbea.com	CNE000000RB8
105782	600089	特变电工	2017-12-31	特变电工股份有限公司	电气机械及器材制造业	C38	新疆维吾尔自治区昌吉州昌吉市北京南路189号	新疆维吾尔自治区昌吉州昌吉市北京南路189号	1993-02-26	1997-06-18	新疆维吾尔自治区	昌吉市	831100	郭俊香	0994-6508000	0994-2723615	guojunxiang@tbea.com	焦海华	91650000299201121Q	报告期内公司无收购及出售资产、吸收合并事项	87.2743922974	43.9674815706	87.2713563274	43.9776678927	张新	变压器、电线电缆及辅助设备的制造和销售。	3718647789	变压器、电抗器、互感器、电线电缆及其他电气机械器材的制造、销售、检修、安装及回收;机械设备、电子产品的生产销售;五金交电的销售;硅及相关产品的制造、研发及相关技术咨询;矿产品的加工;新能源技术、建筑环保技术、水资源利用技术及相关工程项目的研发及咨询;太阳能系统组配件、环保设备的制造、安装及相关技术咨询;太阳能光伏离网和并网及风光互补系统、柴油机光互补系统及其他新能源系列工程的设计、建设、安装及维护;太阳能集中供热工程的设计、安装;太阳能光热产品的设计、制造;承包境外机电行业输变电、水电、火电站工程和国内、国际招标工程,上述境外工程所属的设备、材料出口,对外派遣实施上述境外工程所需的劳务人员;进口钢材经营;一般货物和技术的进出口;电力工程施工总承包;房屋出租;水的生产和供应(限下属分支机构经营);电力供应;热力生产和供应;货物运输代理服务及相关咨询;花草培育、销售。主要产品是:变压器及电抗…	tbeazqb@tbea.com		www.tbea.com	CNE000000RB8
105782	600089	特变电工	2018-12-31	特变电工股份有限公司	电气机械及器材制造业	C38	新疆维吾尔自治区昌吉市北京南路189号	新疆维吾尔自治区昌吉市北京南路189号	1993-02-26	1997-06-18	新疆维吾尔自治区	昌吉市	831100	焦海华	0994-6508000	0994-2723615	jiaohaihua@tbea.com	于永鑫	91650000299201121Q	报告期内公司无收购及出售资产、吸收合并事项	87.2743922974	43.9674815706	87.2713563274	43.9776678927	张新	变压器、电线电缆及辅助设备的制造和销售。	3714502789	变压器、电抗器、互感器、电线电缆及其他电气机械器材的制造、销售、检修、安装及回收;机械设备、电子产品的生产销售;五金交电的销售;硅及相关产品的制造、研发及相关技术咨询;矿产品的加工;新能源技术、建筑环保技术、水资源利用技术及相关工程项目的研发及咨询;太阳能系统组配件、环保设备的制造、安装及相关技术咨询;太阳能光伏离网和并网及风光互补系统、柴油机光互补系统及其他新能源系列工程的设计、建设、安装及维护;太阳能集中供热工程的设计、安装;太阳能光热产品的设计、制造;承包境外机电行业输变电、水电、火电站工程和国内、国际招标工程,上述境外工程所属的设备、材料出口,对外派遣实施上述境外工程所需的劳务人员;进口钢材经营;一般货物和技术的进出口;电力工程施工总承包特级资质、电力行业甲级资质,可承接电力各等级工程施工总承包、工程总承包和项目管理业务;可从事资质证书许可范围内相应的建设工程总承包业务以及项目管…	tbeazqb@tbea.com		www.tbea.com	CNE000000RB8
105971	600100	同方股份	2015-12-31	同方股份有限公司	计算机、通信和其他电子设备制造业	C39	北京市海淀区王庄路1号清华同方科技大厦A座30层	北京市海淀区清华同方科技广场A座29层	1997-06-25	1997-06-27	北京市	北京市	100083	孙岷	010-82399888	010-82399765	600100@thtf.com.cn	张园园		重大资产和股权出售: 2015年11月2日，公司召开第六届董事会第二十六次会议，审议通过了《关于向紫光春 华转让同方国芯36.39%股权的关联交易暨预计新增日常关联交易的议案》，拟将公司持有 的同方国芯36.39%的股权转让给西藏紫光春华投资有限公司，本次转让完成后，公司对 同方国芯的持股比例由41.38%降至4.99%，公司不再将其纳入合并范围。本次交易标的 为公司持有的同方国芯的220,835,000 股股票，定价方式为按照同方国芯停牌前(2015 年10月12日)30个交易日均价31.75元/股确定，交易金额约为70.12亿元。公司已于 2015年11月2日与紫光春华签署了《股份转让协议》，上述议案也已经公司2015年第三 次临时股东大会审议通过。 截至本报告披露日，上述股份转让事宜已经获得财政部审核批准、商务部反垄断审查和 证监会要约收购豁免核准。公司与紫光春华已于2016年4月…	116.3392991598	39.9997148212	116.3392741598	39.9998658212	周立业	计算机及信息技术。	2963898951	许可经营项目：互联网信息服务业务不含新闻、出版、医疗 保健、药品和医疗器械等内容；对外派遣实施与出口自产成套设备相关的境外工程所需的 劳务人员；商用密码产品生产；商用密码产品销售；社会公共安全设备、交通工程设备、 建筑智能化及市政工程机电设备、电力工程机电设备、节能；人工环境控制设备、通信电 子产品、微电子集成电路、办公设备、仪器仪表、光机电一体化设备的生产；水景喷泉制 造；第二类增值电信业务中的因特网接入服务业务（北京1直辖市以及长春、南昌2城市） （增值电信业务经营许可证有效期至2017年05月03日）。一般经营项目：计算机及周 边设备的生产、销售、技术服务和维修；社会公共安全设备、交通工程设备、建筑智能化 及市政工程机电设备、电力工程机电设备、节能；人工环境控制设备、通信电子产品、微 电子集成电路、办公设备的销售及工程安装；仪器仪表、光机电一体化设备的开发、销售； 消防产品的销售；…	600100@thtf.com.cn		www.thtf.com.cn	CNE000000RK9
105971	600100	同方股份	2016-12-31	同方股份有限公司	计算机、通信和其他电子设备制造业	C39	北京市海淀区王庄路1号清华同方科技大厦A座30层	北京市海淀区清华同方科技大厦A座29层	1997-06-25	1997-06-27	北京市	北京市	100083	张园园	010-82399888	010-82399765	600100@thtf.com.cn	张园园	91110000100026793Y	重大资产和股权出售:1)2016年10月18日,公司召开第七届董事会第七次会议,审议通过了《关于向金谊投资出售龙江环保30.7812%股权的议案》,同意公司以每股人民币8元的价格,将持有的龙江环保集团股份有限公司(以下简称"龙江环保")9,850万股股权,占龙江环保总股本的30.7812%转让给上海实业环境控股有限公司下属金谊投资有限公司,交易总金额为7.88亿元。公司已于2016年10月18日与金谊投资签署了《股权转让协议》。关于本次交易的相关信息,投资者也可参阅公司于2016年10月19日在《中国证券报》、《上海证券报》、《证券时报》和上海证券交易所网站(www.sse.com.cn)上披露的相关公告(公告编号:临2016-052)。2)2016年12月8日公司召开第七届董事会第十次会议审议通过了《关于转让全资子公司南通半导体和深圳多媒体股权的议案》,同意公司向重庆博弘怀朴转让公司全…	116.3389191598	39.9993848212	116.3392741598	39.9998658212	周立业	计算机及信息技术。	2963898951	许可经营项目:互联网信息服务业务不含新闻、出版、医疗保健、药品和医疗器械等内容;对外派遣实施与出口自产成套设备相关的境外工程所需的劳务人员;商用密码产品生产;商用密码产品销售;社会公共安全设备、交通工程设备、建筑智能化及市政工程机电设备、电力工程机电设备、节能;人工环境控制设备、通信电子产品、微电子集成电路、办公设备、仪器仪表、光机电一体化设备的生产;水景喷泉制造;第二类增值电信业务中的因特网接入服务业务(北京1直辖市以及长春、南昌2城市)(增值电信业务经营许可证有效期至2017年05月03日)。一般经营项目:计算机及周边设备的生产、销售、技术服务和维修;社会公共安全设备、交通工程设备、建筑智能化及市政工程机电设备、电力工程机电设备、节能;人工环境控制设备、通信电子产品、微电子集成电路、办公设备的销售及工程安装;仪器仪表、光机电一体化设备的开发、销售;消防产品的销售;高科技项目的咨询、高…	600100@thtf.com.cn		www.thtf.com.cn	CNE000000RK9
105971	600100	同方股份	2017-12-31	同方股份有限公司	计算机、通信和其他电子设备制造业	C39	北京市海淀区王庄路1号清华同方科技大厦A座30层	北京市海淀区清华同方科技大厦A座29层	1997-06-25	1997-06-27	北京市	北京市	100083	张园园	010-82399888	010-82399765	600100@thtf.com.cn	王鹏	91110000100026793Y	重大资产和股权出售:公司分别于2016年12月8日、12月26日召开了第七届董事会第十次会议、2016年度第五次临时股东大会,审议通过了公司《关于转让全资子公司南通半导体和深圳多媒体股权的议案》,同意公司向重庆博弘怀朴企业管理合伙企业(有限合伙)(以下简称“重庆博弘怀朴”)转让公司全资子公司南通同方半导体有限公司(以下简称“南通半导体”)100%的股权和深圳市同方多媒体科技有限公司(以下简称“深圳多媒体”)100%的股权。截至本报告披露日,重庆博弘怀朴已根据《股权转让协议》,支付了涉及本次交易的全部股权转让款,公司已全额收到,至此公司转让南通半导体和深圳多媒体股权的交易事项已全部履行完毕。详情请投资者查阅公司于指定信息披露媒体披露的公告(公告编号:临2016-066号、临2016-069号、临2016-074号、临2017-001号和临2017-015)。	116.3389191598	39.9993848212	116.3392741598	39.9998658212	周立业	计算机及信息技术。	2963898951	互联网信息服务业务不含新闻、出版、医疗保健、药品和医疗器械等内容;对外派遣实施与出口自产成套设备相关的境外工程所需的劳务人员;商用密码产品生产;商用密码产品销售;社会公共安全设备、交通工程设备、建筑智能化及市政工程机电设备、电力工程机电设备、节能;人工环境控制设备、通信电子产品、微电子集成电路、办公设备、仪器仪表、光机电一体化设备的生产;水景喷泉制造;第一类增值电信业务中的互联网接入服务业务(北京以及长春、南昌);计算机及周边设备的生产、销售、技术服务和维修;社会公共安全设备、交通工程设备、建筑智能化及市政工程机电设备、电力工程机电设备、节能;人工环境控制设备、通信电子产品、微电子集成电路、办公设备的销售及工程安装;仪器仪表、光机电一体化设备的开发、销售;消防产品的销售;高科技项目的咨询、高新技术的转让与服务;物业管理;进出口业务;机电安装工程施工总承包;建筑智能化、城市及道路照明、电子…	600100@thtf.com.cn		www.thtf.com.cn	CNE000000RK9
105971	600100	同方股份	2018-12-31	同方股份有限公司	计算机、通信和其他电子设备制造业	C39	北京市海淀区王庄路1号清华同方科技大厦A座30层	北京市海淀区清华同方科技大厦A座29层	1997-06-25	1997-06-27	北京市	北京市	100083	张园园	010-82399888	010-82399765	600100@thtf.com.cn	王鹏	91110000100026793Y	报告期内公司无收购及出售资产、吸收合并事项	116.3392741598	39.9998658212	116.3392741598	39.9998658212	周立业	计算机及信息技术。	2963898951	互联网信息服务业务不含新闻、出版、医疗保健、药品和医疗器械等内容;对外派遣实施与出口自产成套设备相关的境外工程所需的劳务人员;商用密码产品生产;商用密码产品销售;社会公共安全设备、交通工程设备、建筑智能化及市政工程机电设备、电力工程机电设备、节能;人工环境控制设备、通信电子产品、微电子集成电路、办公设备、仪器仪表、光机电一体化设备的生产;水景喷泉制造;第一类增值电信业务中的互联网接入服务业务(北京以及长春、南昌);从事互联网文化活动;计算机及周边设备的生产、销售、技术服务和维修;社会公共安全设备、交通工程设备、建筑智能化及市政工程机电设备、电力工程机电设备、节能;人工环境控制设备、通信电子产品、微电子集成电路、办公设备的销售及工程安装;仪器仪表、光机电一体化设备的开发、销售;消防产品的销售;高科技项目的咨询、高新技术的转让与服务;物业管理;进出口业务;机电安装工程施工总承包;建筑智能化、…	600100@thtf.com.cn		www.thtf.com.cn	CNE000000RK9
105904	600104	上汽集团	2015-12-31	上海汽车集团股份有限公司	汽车制造业	C36	上海市张江高科技园区松涛路563号1号楼509室	上海市静安区威海路489号	1997-11-24	1997-11-25	上海市	上海市	200041	王剑璋	021-22011138	021-22011777	saicmotor@saic.com.cn	卫勇	91310000132260250X	报告期内公司无收购及出售资产、吸收合并事项	121.4622866386	31.2267162987	121.5859162493	31.2055162139	陈虹	汽车，摩托车，拖拉机等各种机动车整车，机械设备，总成及零部件的生产、销售。	11025566629	汽车，摩托车，拖拉机等各种机动车整车，机械设备，总成及零部件 的生产、销售，国内贸易（除专项规定)，咨询服务业，经营本企业自产产品及技术的出口业务和 本企业所需的机械设备、零配件、原辅材料及技术的进口业务（但国家限定公司经营或禁止进出 口的商品及技术除外)，本企业包括本企业控股的成员企业，汽车租赁及机械设备租赁，实业投资， 期刊出版，利用自有媒体发布广告，从事货物及技术进出口业务（依法须经批准的项目，经相关 部门批准后方可开展经营活动)	saicmotor@saic.com.cn		www.saicmotor.com	CNE000000TY6
105904	600104	上汽集团	2016-12-31	上海汽车集团股份有限公司	汽车制造业	C36	上海市自由贸易试验区松涛路563号1号楼509室	上海市静安区威海路489号	1997-11-24	1997-11-25	上海市	上海市	200041	王剑璋	021-22011138	021-22011777	saicmotor@saic.com.cn	卫勇	91310000132260250X	报告期内公司无收购及出售资产、吸收合并事项	121.4622866386	31.2267162987	121.5859162493	31.2055162139	陈虹	汽车，摩托车，拖拉机等各种机动车整车，机械设备，总成及零部件的生产、销售。	11025566629	汽车,摩托车,拖拉机等各种机动车整车,机械设备,总成及零部件的生产、销售,国内贸易(除专项规定),咨询服务业,经营本企业自产产品及技术的出口业务和本企业所需的机械设备、零配件、原辅材料及技术的进口业务(但国家限定公司经营或禁止进出口的商品及技术除外),本企业包括本企业控股的成员企业,汽车租赁及机械设备租赁,实业投资,期刊出版,利用自有媒体发布广告,从事货物及技术进出口业务(依法须经批准的项目,经相关部门批准后方可开展经营活动)。	saicmotor@saic.com.cn		www.saicmotor.com	CNE000000TY6
105904	600104	上汽集团	2017-12-31	上海汽车集团股份有限公司	汽车制造业	C36	上海市自由贸易试验区松涛路563号1号楼509室	上海市静安区威海路489号	1997-11-24	1997-11-25	上海市	上海市	200041	王剑璋	021-22011138	021-22011777	saicmotor@saic.com.cn	卫勇	91310000132260250X	报告期内公司无收购及出售资产、吸收合并事项	121.4622866386	31.2267162987	121.5859162493	31.2055162139	陈虹	汽车，摩托车，拖拉机等各种机动车整车，机械设备，总成及零部件的生产、销售。	11683461365	汽车,摩托车,拖拉机等各种机动车整车,机械设备,总成及零部件的生产、销售,国内贸易(除专项规定),咨询服务业,经营本企业自产产品及技术的出口业务和本企业所需的机械设备、零配件、原辅材料及技术的进口业务(但国家限定公司经营或禁止进出口的商品及技术除外),本企业包括本企业控股的成员企业,汽车租赁及机械设备租赁,实业投资,期刊出版,利用自有媒体发布广告,从事货物及技术进出口业务(依法须经批准的项目,经相关部门批准后方可开展经营活动)。	saicmotor@saic.com.cn		www.saicmotor.com	CNE000000TY6
105904	600104	上汽集团	2018-12-31	上海汽车集团股份有限公司	汽车制造业	C36	上海市自由贸易试验区松涛路563号1号楼509室	上海市静安区威海路489号	1997-11-24	1997-11-25	上海市	上海市	200041	卫勇	021-22011138	021-22011777	saicmotor@saic.com.cn	卫勇	91310000132260250X	报告期内公司无收购及出售资产、吸收合并事项	121.4622866386	31.2267162987	121.5859162493	31.2055162139	陈虹	汽车，摩托车，拖拉机等各种机动车整车，机械设备，总成及零部件的生产、销售。	11683461365	汽车,摩托车,拖拉机等各种机动车整车,机械设备,总成及零部件的生产、销售,国内贸易(除专项规定),咨询服务业,以电子商务方式从事汽车整车、总成及零部件的销售,从事网络科技领域内的技术服务,经营本企业自产产品及技术的出口业务和本企业所需的机械设备、零配件、原辅材料及技术的进口业务(但国家限定公司经营或禁止进出口的商品及技术除外),本企业包括本企业控股的成员企业,汽车租赁及机械设备租赁,实业投资,期刊出版,利用自有媒体发布广告,从事货物及技术进出口业务(依法须经批准的项目,经相关部门批准后方可开展经营活动)。	saicmotor@saic.com.cn		www.saicmotor.com	CNE000000TY6
105738	600109	国金证券	2015-12-31	国金证券股份有限公司	资本市场服务	J67	四川省成都市青羊区东城根上街95号	四川省成都市青羊区东城根上街95号成证大厦16楼	1988-07-20	1997-08-07	四川省	成都市	610015	周洪刚	028-86690021	028-86695681	tzzgx@gjzq.com.cn	叶新豪		报告期内公司无收购及出售资产、吸收合并事项	104.0604267344	30.6621654677	104.0603407344	30.6623064677	冉云	证券（含境内上市外资股）的代理买卖、还本付息、承销、咨询等	3024359310	证券经纪；证券投资咨询；与证券交易、证券投资活动有关的财务顾问；证券承销与保荐；证券自营；融资融券；证券资产管理；证券投资基金代销；为期货公司提供中间介绍业务；代销金融产品。	bgs@gjzq.com.cn		www.gjzq.com.cn	CNE000000SV4
105738	600109	国金证券	2016-12-31	国金证券股份有限公司	资本市场服务	J67	四川省成都市青羊区东城根上街95号	四川省成都市青羊区东城根上街95号成证大厦16楼	1988-07-20	1997-08-07	四川省	成都市	610015	周洪刚	028-86690021	028-86695681	tzzgx@gjzq.com.cn	叶新豪	91510100201961940F	报告期内公司无收购及出售资产、吸收合并事项	104.0604267344	30.6621654677	104.0603407344	30.6623064677	冉云	证券（含境内上市外资股）的代理买卖、还本付息、承销、咨询等	3024359310	证券经纪;证券投资咨询;与证券交易、证券投资活动有关的财务顾问;证券承销与保荐;证券自营;融资融券;证券资产管理;证券投资基金代销;为期货公司提供中间介绍业务;代销金融产品	bgs@gjzq.com.cn		www.gjzq.com.cn	CNE000000SV4
105738	600109	国金证券	2017-12-31	国金证券股份有限公司	资本市场服务	J67	四川省成都市青羊区东城根上街95号	四川省成都市青羊区东城根上街95号成证大厦16楼	1988-07-20	1997-08-07	四川省	成都市	610015	周洪刚	028-86690021	028-86695681	tzzgx@gjzq.com.cn	叶新豪	91510100201961940F	报告期内公司无收购及出售资产、吸收合并事项	104.0604267344	30.6621654677	104.0603407344	30.6623064677	冉云	证券（含境内上市外资股）的代理买卖、还本付息、承销、咨询等	3024359310	证券经纪;证券投资咨询;与证券交易、证券投资活动有关的财务顾问;证券承销与保荐;证券自营;融资融券;证券资产管理;证券投资基金代销;为期货公司提供中间介绍业务;代销金融产品。	bgs@gjzq.com.cn		www.gjzq.com.cn	CNE000000SV4
105738	600109	国金证券	2018-12-31	国金证券股份有限公司	资本市场服务	J67	四川省成都市青羊区东城根上街95号	四川省成都市青羊区东城根上街95号成证大厦16楼	1988-07-20	1997-08-07	四川省	成都市	610015	周洪刚	028-86690021	028-86695681	tzzgx@gjzq.com.cn	叶新豪	91510100201961940F	报告期内公司无收购及出售资产、吸收合并事项	104.0604267344	30.6621654677	104.0603407344	30.6623064677	冉云	证券（含境内上市外资股）的代理买卖、还本付息、承销、咨询等	3024359310	证券经纪;证券投资咨询;与证券交易、证券投资活动有关的财务顾问;证券承销与保荐;证券自营;融资融券;证券资产管理;证券投资基金代销;为期货公司提供中间介绍业务;代销金融产品。(依法须经批准的项目,经相关部门批准后方可开展经营活动)。	bgs@gjzq.com.cn		www.gjzq.com.cn	CNE000000SV4
105740	600111	北方稀土	2015-12-31	中国北方稀土(集团)高科技股份有限公司	有色金属冶炼及压延加工业	C32	内蒙古自治区包头市稀土高新技术产业开发区	内蒙古自治区包头市稀土高新技术产业开发区黄河路83号	1997-09-12	1997-09-24	内蒙古自治区	包头市	014030	张日辉	0472-2207525,2207799	0472-2207788	cnrezqb@126.com		91150000701463622D	报告期内公司无收购及出售资产、吸收合并事项	109.8429762517	40.6294305377	109.8403554261	40.6574496429	孟志泉	稀土精矿、稀土深加工产品、稀土新材料生产与销售。	3633066000	稀土精矿，稀土深加工产品，稀土新材 料生产与销售，稀土高科技应用产品的开发、生产和销售。	security@reht.com		www.reht.com;www.reht.cn	CNE000000T18
105740	600111	北方稀土	2016-12-31	中国北方稀土（集团）高科技股份有限公司	有色金属冶炼及压延加工业	C32	内蒙古自治区包头市稀土高新技术产业开发区	内蒙古自治区包头市稀土高新技术产业开发区黄河大街83号	1997-09-12	1997-09-24	内蒙古自治区	包头市	014030	李金玲	0472-2207525,220779	0472-2207788	cnrezqb@126.com		91150000701463622D	报告期内公司无收购及出售资产、吸收合并事项	109.7055416926	40.6606199274	109.8403554261	40.6574496429	魏栓师	稀土精矿、稀土深加工产品、稀土新材料生产与销售。	3633066000	稀土精矿,稀土深加工产品,稀土新材料生产与销售,稀土高科技应用产品的开发、生产和销售;稀土技术转让等。	security@reht.com		www.reht.com,www.reht.cn	CNE000000T18
105740	600111	北方稀土	2017-12-31	中国北方稀土(集团)高科技股份有限公司	有色金属冶炼及压延加工业	C32	内蒙古自治区包头市稀土高新技术产业开发区黄河大街83号	内蒙古自治区包头市稀土高新技术产业开发区黄河大街83号	1997-09-12	1997-09-24	内蒙古自治区	包头市	014030	李金玲	0472-2207799,2207525	0472-2207788	cnrezqb@126.com		91150000701463622D	报告期内公司无收购及出售资产、吸收合并事项	109.8428562517	40.6293505377	109.8429762517	40.6294315377	赵殿清	稀土精矿、稀土深加工产品、稀土新材料生产与销售。	3633066000	稀土精矿,稀土深加工产品,稀土新材料生产与销售,稀土高科技应用产品的开发、生产和销售;稀土技术转让等。	security@reht.com		www.reht.comwww.reht.cn	CNE000000T18
105740	600111	北方稀土	2018-12-31	中国北方稀土(集团)高科技股份有限公司	有色金属冶炼及压延加工业	C32	内蒙古自治区包头市稀土高新技术产业开发区黄河大街83号	内蒙古自治区包头市稀土高新技术产业开发区黄河大街83号	1997-09-12	1997-09-24	内蒙古自治区	包头市	014030	余英武	0472-2207799,2207525	0472-2207788	cnrezqb@126.com		91150000701463622D	重大资产和股权出售:报告期内,为盘活公司存量资产,提高资金使用效率和效益,公司依据资产评估结果确定的价款总计120,302.54万元(不含税),向关联方包钢股份出售了公司稀土选矿生产及工业试验后库存的549.48万吨稀土矿石,以及公司稀选厂、白云博宇分公司的房屋建筑物、机器设备和材料备件资产。本项资产出售对公司业务连续性、管理层稳定性不构成影响。截至报告期末,公司与包钢股份已完成资产交割及价款支付。	109.8429762517	40.6294315377	109.8429762517	40.6294315377	赵殿清	稀土精矿、稀土深加工产品、稀土新材料生产与销售。	3633066000	稀土精矿,稀土深加工产品,稀土新材料生产与销售,稀土高科技应用产品的开发、生产和销售;稀土技术转让等。	security@reht.com		www.reht.comwww.reht.cn	CNE000000T18
103612	600115	东方航空	2015-12-31	中国东方航空股份有限公司	航空运输业	G56	上海市浦东国际机场机场大道66号	上海市虹桥路2550号	1995-04-14	1997-02-05	上海市	上海市	200335	汪健	021-22330928	021-62686116	ir@ceair.com	杨辉	913100007416029816	报告期内公司无收购及出售资产、吸收合并事项	121.3514206286	31.1920603299	121.7747203074	31.1671802242	刘绍勇	国内和经批准的国际、地区航空客、货、邮、行李运输业务及延伸服务。	13140178860	国内和经批准的地区、国际 航空客、货、邮、行李运输业务及延伸服务；通用航空业务；航空器维 修；航空设备制造与维修；国内外航空公司的代理业务；行业相关材 料、设备与技术进出口业务；旅游服务；宾馆业务及与航空运输有关的 其他业务。	ir@ceair.com	00670	www.ceair.com	CNE000000TR0
103612	600115	东方航空	2016-12-31	中国东方航空股份有限公司	航空运输业	G56	上海市浦东新区国际机场机场大道66号	上海市长宁区空港三路92号	1995-04-14	1997-02-05	上海市	上海市	200335	汪健	021-22330928	021-62686116	ir@ceair.com	杨辉	913100007416029816	重大资产和股权出售:2016年11月29日,本公司与东航产投签署《东航物流股权转让协议》,向东航产投转让本公司持有的东航物流100%股权。上述股权转让关联交易已经公司2017年第一次临时股东大会审议通过。截至2017年2月8日,本公司已将持有的东航物流100%股权转让给东航产投,并完成工商变更登记手续。自2017年2月8日起,东航物流股东方由本公司变更为东航产投。本次股权转让交易完成后,本公司未来将专注从事航空客运业务,深入推进改革转型,提升公司航空客运主业的经营管理能力,努力为股东创造更好的投资回报。详情请参见本公司2016年11月30日在《中国证券报》、《上海证券报》和上海证券交易所网站(www.sse.com.cn)以及2017年1月18日和2月11日在《中国证券报》、《上海证券报》、《证券日报》和上海证券交易所网站刊发的公告。	121.7749033074	31.1670972242	121.7747203074	31.1671802242	刘绍勇	国内和经批准的国际、地区航空客、货、邮、行李运输业务及延伸服务。	14467590000	国内和经批准的地区、国际航空客、货、邮、行李运输业务及延伸服务;通用航空业务;航空器维修;航空设备制造与维修;国内外航空公司的代理业务;行业相关材料、设备与技术进出口业务;旅游服务;宾馆业务及与航空运输有关的其他业务。	ir@ceair.com	00670	www.ceair.com	CNE000000TR0
103612	600115	东方航空	2017-12-31	中国东方航空股份有限公司	航空运输业	G56	上海市浦东新区国际机场机场大道66号	上海市长宁区空港三路92号	1995-04-14	1997-02-05	上海市	上海市	200335	汪健	021-22330933	021-62686116	ir@ceair.com	杨辉	913100007416029816	重大资产和股权出售:2016年11月29日,公司与东航产投签署《东航物流股权转让协议》,向东航产投转让公司持有的东航物流100%股权。上述股权转让关联交易已经公司2017年第一次临时股东大会审议通过。截至2017年2月8日,公司已将持有的东航物流100%股权转让给东航产投,并完成工商变更登记手续。本次股权转让交易完成后,公司未来将专注从事航空客运业务,深入推进改革转型,提升公司航空客运主业的经营管理能力,努力为股东创造更好的投资回报。	121.7749033074	31.1670972242	121.7747203074	31.1671802242	刘绍勇	国内和经批准的国际、地区航空客、货、邮、行李运输业务及延伸服务。	14467000000	国内和经批准的地区、国际航空客、货、邮、行李运输业务及延伸服务;通用航空业务;航空器维修;航空设备制造与维修;国内外航空公司的代理业务;行业相关材料、设备与技术进出口业务;旅游服务;宾馆业务及与航空运输有关的其他业务。	ir@ceair.com	00670	www.ceair.com	CNE000000TR0
103612	600115	东方航空	2018-12-31	中国东方航空股份有限公司	航空运输业	G56	上海市浦东新区国际机场机场大道66号	上海市闵行区虹翔三路36号	1995-04-14	1997-02-05	上海市	上海市	201100	汪健	021-22330929	021-62686116	ir@ceair.com	杨辉	913100007416029816	报告期内公司无收购及出售资产、吸收合并事项	121.3280607788	31.187504487	121.7747203074	31.1671802242	刘绍勇	国内和经批准的国际、地区航空客、货、邮、行李运输业务及延伸服务。	16800000000	国内和经批准的地区、国际航空客、货、邮、行李运输业务及延伸服务;通用航空业务;航空器维修;航空设备制造与维修;国内外航空公司的代理业务;行业相关材料、设备与技术进出口业务;旅游服务;宾馆业务及与航空运输有关的其他业务。	ir@ceair.com	00670	www.ceair.com	CNE000000TR0
105847	600118	中国卫星	2015-12-31	中国东方红卫星股份有限公司	计算机、通信和其他电子设备制造业	C39	北京市海淀区中关村南大街31号神舟科技大厦12层	北京市海淀区中关村南大街31号神舟科技大厦12层	1997-08-21	1997-09-08	北京市	北京市	100081	万银娟	010-68118118,68197793	010-68197777	600118@spacesat.com.cn	徐红梅		报告期内公司无收购及出售资产、吸收合并事项	116.3240917	39.9475861844	116.3233467	39.9469471844	张洪太	卫星应用运营服务、卫星及卫星应用产品和基础的研制、系统集成。	1182489135	公司的主营业务为卫星及相关产品的研制、航天技术应用及相关产品的研制及服务。	600118@spacesat.com.cn		www.spacesat.com.cn	CNE000000SM3
105847	600118	中国卫星	2016-12-31	中国东方红卫星股份有限公司	计算机、通信和其他电子设备制造业	C39	北京市海淀区中关村南大街31号神舟科技大厦12层	北京市海淀区中关村南大街31号神舟科技大厦12层	1997-08-21	1997-09-08	北京市	北京市	100081	万银娟	010-68118118	010-68197777	600118@spacesat.com.cn	徐红梅	911100001000274544	报告期内公司无收购及出售资产、吸收合并事项	116.3240917	39.9475861844	116.3233467	39.9469471844	张洪太	卫星应用运营服务、卫星及卫星应用产品和基础的研制、系统集成。	1182489135	卫星及相关产品的研发、设计、制造、销售;航天技术应用及相关产品的研发、设计、制造、销售及综合信息服务。	600118@spacesat.com.cn		www.spacesat.com.cn	CNE000000SM3
105847	600118	中国卫星	2017-12-31	中国东方红卫星股份有限公司	计算机、通信和其他电子设备制造业	C39	北京市海淀区中关村南大街31号神舟科技大厦12层	北京市海淀区中关村南大街31号神舟科技大厦12层	1997-08-21	1997-09-08	北京市	北京市	100081	万银娟	010-68118118	010-68197777	600118@spacesat.com.cn	徐红梅	911100001000274544	报告期内公司无收购及出售资产、吸收合并事项	116.3240917	39.9475861844	116.3233467	39.9469471844	张洪太	卫星应用运营服务、卫星及卫星应用产品和基础的研制、系统集成。	1182489100	卫星及相关产品的研发、设计、制造、销售;航天技术应用及相关产品的研发、设计、制造、销售及综合信息服务。	600118@spacesat.com.cn		www.spacesat.com.cn	CNE000000SM3
105847	600118	中国卫星	2018-12-31	中国东方红卫星股份有限公司	计算机、通信和其他电子设备制造业	C39	北京市海淀区中关村南大街31号神舟科技大厦12层	北京市海淀区中关村南大街31号神舟科技大厦12层	1997-08-21	1997-09-08	北京市	北京市	100081	万银娟	010-68118118	010-68197777	600118@spacesat.com.cn	徐红梅	911100001000274544	报告期内公司无收购及出售资产、吸收合并事项	116.3240917	39.9475861844	116.3233467	39.9469471844	张洪太	卫星应用运营服务、卫星及卫星应用产品和基础的研制、系统集成。	1182489135	卫星及相关产品的研发、设计、制造、销售;航天技术应用及相关产品的研发、设计、制造、销售及综合信息服务。	600118@spacesat.com.cn		www.spacesat.com.cn	CNE000000SM3
105835	600150	*ST船舶	2015-12-31	中国船舶工业股份有限公司	铁路、船舶、航空航天和其它运输设备制造业	C37	上海市浦东新区浦东大道1号	上海市浦东新区浦东大道1号15A层	1998-05-12	1998-05-20	上海市	上海市	200120	陶健	021-68860618	021-68860568	stock@csscholdings.com	张东波		重大资产和股权出售: 2015年3月12日，公司召开第六届董事会第二次会议，其中审议通过了《关于公司全资子 公司外高桥造船出售上海江南长兴造船有限责任公司14%股权暨关联交易的预案》。为贯彻落实 公司“转方式、调结构”及全面转型发展战略，进一步调整本公司全资子公司上海外高桥造船有限 公司产品结构，优化造船资源、为促进高附加值产品生产提供资金支持、向多元化业务转型的需 求，同意外高桥造船出售所持上海江南长兴造船有限责任公司14%股权予沪东中华造船（集团） 有限公司，交易价格以最终各方认可的经备案的资产评估结果作为定价依据，上海江南长兴造船 有限公司14%股权转让价格为440,872,439.98元。截至本报告期末，上述关联交易已完成。	121.5111805816	31.2386304453	121.5111755816	31.2388464453	董强	船用柴油机及备配件、铸锻件的设计、制造、销售。	1378117598	船舶行业和柴油机生产行业内 的投资，民用船舶销售，船舶专用设备、机电设备的制造、安装、销售，船舶技术领域 内的技术开发、技术转让、技术服务、技术咨询，从事货物及技术的进出口业务，自有 设备租赁等。主要产品或提供劳务为船舶修造、船用柴油机制造及工程机械服务。	stock@csscholdings.com		csscholdings.cssc.net.cn	CNE000000W05
105835	600150	*ST船舶	2016-12-31	中国船舶工业股份有限公司	铁路、船舶、航空航天和其它运输设备制造业	C37	上海市自由贸易试验区浦东大道1号	上海市浦东大道1号15A层	1998-05-12	1998-05-20	上海市	上海市	200120	陶健	021-68860618	021-68860568	stock@csscholdings.com	张东波	91310000631899761Q	重大资产和股权出售:1、2016年12月16日,公司第六届董事会第十六次会议审议通过了《关于公司及控股子公司转让广州中船文冲船坞有限公司49.66%股权暨关联交易的议案》。公司向中船集团转让了文冲船坞24.03%股权,子公司中船澄西向中船集团转让了文冲船坞25.63%股权,于2016年12月31日完成了股权转让相关事宜。股权转让对价为354,967,242.15元(于2016年12月29日收到了股权转让款204,000,523.64元),确认股权转让收益57,877,240.76元。2、2016年12月16日,公司第六届董事会第十六次会议审议通过了《关于公司控股子公司转让中船广西船舶及海洋工程有限公司18.164%股权暨关联交易的议案》。根据双方签署的《关于转让中船广西船舶及海洋工程有限公司相关股权的协议》,交易的主要内容为:中船澄西向中船集团转让所持有的广西船海18.164%的股权,交…	121.5111805816	31.2386304453	121.5114625816	31.2386744453	董强	船用柴油机及备配件、铸锻件的设计、制造、销售。	1378117598	船舶行业和柴油机生产行业内的投资,民用船舶销售,船舶专用设备、机电设备的制造、安装、销售,船舶技术领域内的技术开发、技术转让、技术服务、技术咨询,从事货物及技术的进出口业务,自有设备租赁等。主要产品或提供劳务为船舶修造、船用柴油机制造及工程机械服务。	stock@csscholdings.com		csscholdings.cssc.net.cn	CNE000000W05
105884	600153	建发股份	2015-12-31	厦门建发股份有限公司	批发业	F51	中国福建省厦门市思明区环岛东路1699号建发国际大厦29层	中国福建省厦门市思明区环岛东路1699号建发国际大厦29层	1998-06-10	1998-06-16	福建省	厦门市	361008	林茂	0592-2132319	0592-2592459	lm@chinacnd.com	李蔚萍		报告期内公司无收购及出售资产、吸收合并事项	118.1911537441	24.4739780339	118.1911387441	24.4740510339	张勇峰	进出口贸易、港口贸易配套服务、临港工业基地建设。	2835200530	进出口及国内贸易、房地产开发与经营、物流服务及实业投资等	pub@chinacnd.com		www.chinacnd.com	CNE000000WL7
105884	600153	建发股份	2016-12-31	厦门建发股份有限公司	批发业	F51	福建省厦门市思明区环岛东路1699号建发国际大厦29层	福建省厦门市思明区环岛东路1699号建发国际大厦29层	1998-06-10	1998-06-16	福建省	厦门市	361008	江桂芝	0592-2132319	0592-2592459	jgz@chinacnd.com	黄丽琼	91350200260130346B	重大资产和股权出售:2016年12月13日,公司第七届董事会第五次会议审议通过了《关于转让上海兆御投资发展有限公司股权暨关联交易的议案》,公司将持有的上海兆御20%股权及公司控股子公司建发房产持有的上海兆御60%股权转让给公司控股股东建发集团,并由建发集团负责清偿公司和建发房产为上海兆御提供的股东借款本金和利息。其中,公司持有的20%上海兆御股权转让价格为129,504,338.90元,建发房产持有的60%上海兆御股权转让价格为388,513,016.69元,该关联交易已于2016年12月29日实施完毕,相关情况详见公司于上海证券交易所(http://www.sse.com.cn/)披露的"临2016-53号"、"临2016-55号"公告。	118.1911537441	24.4739780339	118.1911387441	24.4740510339	张勇峰	进出口贸易、港口贸易配套服务、临港工业基地建设。	2835200530	进出口及国内贸易、房地产开发与经营、物流服务及实业投资等。	pub@chinacnd.com		www.chinacnd.com	CNE000000WL7
105884	600153	建发股份	2017-12-31	厦门建发股份有限公司	批发业	F51	福建省厦门市思明区环岛东路1699号建发国际大厦29层	福建省厦门市思明区环岛东路1699号建发国际大厦29层	1998-06-10	1998-06-16	福建省	厦门市	361008	江桂芝	0592-2132319	0592-2592459	jgz@chinacnd.com	黄丽琼	91350200260130346B	重大资产和股权出售:2017年12月20日,公司第七届董事会第十一次临时会议审议通过了《关于控股子公司转让上海新湾景置业有限公司100%股权及债权的议案》,公司控股子公司建发房产通过协议转让的方式向上海泽辰房地产经营有限公司转让其持有的上海新湾景100%股权及债权,其中上海新湾景100%股权的转让价格为825,062,854.64元,债权转让款为319,270,986.46元,合计转让价款为1,144,333,841.10元。相关情况详见公司于上海证券交易所(http://www.sse.com.cn/)披露的“临2017-58号”公告。公司通过转让股权方式一次性实现项目销售,能够加快资金周转和减少税负。	118.1911537441	24.4739780339	118.1911387441	24.4740510339	张勇峰	进出口贸易、港口贸易配套服务、临港工业基地建设。	2835200530	进出口及国内贸易、房地产开发与经营、物流服务及实业投资等。	pub@chinacnd.com		www.chinacnd.com	CNE000000WL7
105884	600153	建发股份	2018-12-31	厦门建发股份有限公司	批发业	F51	福建省厦门市思明区环岛东路1699号建发国际大厦29层	福建省厦门市思明区环岛东路1699号建发国际大厦29层	1998-06-10	1998-06-16	福建省	厦门市	361008	江桂芝	0592-2132319	0592-2592459	jgz@chinacnd.com	黄丽琼	91350200260130346B	报告期内公司无收购及出售资产、吸收合并事项	118.1911387441	24.4740510339	118.1911387441	24.4740510339	张勇峰	进出口贸易、港口贸易配套服务、临港工业基地建设。	2835200530	进出口及国内贸易、房地产开发与经营、物流服务及实业投资等。	pub@chinacnd.com		www.chinacnd.com	CNE000000WL7
105942	600157	永泰能源	2015-12-31	永泰能源股份有限公司	煤炭开采和洗选业	B06	山西省晋中市灵石县翠峰镇新建街110号	山西省太原市小店区亲贤北街9号双喜广场26-27F	1989-04-30	1998-05-13	山西省	晋中市	030006	李军	0351-8366507	0351-8366501	wteclzqb@126.com	居亮		重大资产和股权出售: 交易对方:山东焦化集团有限公司 被出售资产/股权:永泰运销集团有限公司100%股权 出售日:2015.3.31 出售价格:302,100,000 本年初起至出售日该资产为上市公司贡献的净利润:-413,993.76 出售产生的损益:24,914,104.53 是否为关联交易(如是,说明定价原则):否 资产出售定价原则:公允价值 所涉及的资产产权是否已全部过户:是 所涉及的债权债务是否已全部转移:是 该资产出售为上市公司贡献的净利润占利润总额的比例(%):4.08 关联关系:无	112.5832683103	37.8246910171	111.7902220395	36.8496516966	徐培忠	煤矿及其他矿山投资，电厂投资等。	11194639548	综合能源开发；大宗商品物流；新兴产业投资。	wteclbg@126.com		www.wtecl.com;www.永泰能源.中国	CNE000000WD4
105942	600157	永泰能源	2016-12-31	永泰能源股份有限公司	煤炭开采和洗选业	B06	山西省晋中市灵石县翠峰镇新建街南110号	山西省太原市小店区亲贤北街9号双喜广场26、27楼	1989-04-30	1998-05-13	山西省	晋中市	030006	李军	0351-8366670	0351-8366501	wteclzqb@126.com	宁方伟	91140000267171001C	重大资产和股权出售:交易对方:南京派伦信息技术有限公司;山东海靖能源有限公司;山东昊廷能源有限公司;山东昊廷能源有限公司;山东耀欣智能科技有限公司;被出售资产/股权:北京三吉利电力燃料有限责任公司75%股权;北京润泰创业投资管理有限公司100%股权;新疆永泰兴业能源有限公司100%股权;西藏朗鑫矿产资源投资有限公司100%股权;山西中信泰和能源投资有限公司100%股权;出售日:2016.9.12;2016.12.16;2016.12.27;2016.12.27;2016.12.27;出售价格(万元):2,300;2,300;9,600;10,000;5,000;本年初起至出售日该资产为上市公司贡献的净利润:-49,540.88;1,917,018.75;-5,121.67;-2,118.15;-1,193.06;出售产生的损益(万元):376.89;53.55;11.94;22.78;3…	111.7752718684	36.8477316219	111.7901520395	36.8497026966	徐培忠	煤矿及其他矿山投资，电厂投资等。	12425795326	综合能源开发;大宗商品物流;新兴产业投资。	wteclbg@126.com		www.wtecl.com;www.永泰能源.中国	CNE000000WD4
105942	600157	永泰能源	2017-12-31	永泰能源股份有限公司	煤炭开采和洗选业	B06	山西省晋中市灵石县翠峰镇新建街南110号	山西省太原市小店区亲贤北街9号双喜广场26、27楼	1989-04-30	1998-05-13	山西省	晋中市	030006	李军	0351-8366670	0351-8366501	wteclzqb@126.com	宁方伟	91140000267171001C	报告期内公司无收购及出售资产、吸收合并事项	111.7752718684	36.8477316219	111.7901520395	36.8497026966	徐培忠	煤矿及其他矿山投资，电厂投资等。	12425795326	综合能源开发;大宗商品物流;新兴产业投资。	wteclbg@126.com		www.wtecl.com;www.永泰能源.中国	CNE000000WD4
105886	600170	上海建工	2015-12-31	上海建工集团股份有限公司	土木工程建筑业	E48	上海市浦东新区福山路33号	上海市虹口区东大名路666号	1998-06-15	1998-06-23	上海市	上海市	200080	李胜	021-38100838	021-55886222	ir@scg.com.cn	施栋		报告期内公司无收购及出售资产、吸收合并事项	121.5016766225	31.2493726834	121.5252927898	31.2387620384	徐征	从事各类土木建筑工程的总承包、设计、施工业务。国内贸易。	5943214237	房屋建筑工程总承包、专业施工、设计、装饰、园林绿化设计施工工程总承包、房地产开发经营、石料开采及混凝土加工制造、市政工程建设项目管理、城市基础设施投资建设项目、成套设备及其他商品贸易、扎拉矿业，以及工程项目管理咨询与劳务派遣。	ir@scg.com.cn		www.scg.com.cn	CNE000000WR4
105886	600170	上海建工	2016-12-31	上海建工集团股份有限公司	土木工程建筑业	E48	上海市自由贸易试验区福山路33号	上海市的东大名路666号	1998-06-15	1998-06-23	上海市	上海市	200080	李胜	021-38100838	021-55886222	ir@scg.com.cn	施栋	91310000631189305E	报告期内公司无收购及出售资产、吸收合并事项	121.5250375607	31.2385886085	121.5252927898	31.2387620384	徐征	从事各类土木建筑工程的总承包、设计、施工业务。国内贸易。	7131857084	房屋建筑工程总承包、专业施工、设计、装饰、园林绿化设计施工工程总承包、房地产开发经营、石料开采及混凝土加工制造、市政工程建设项目管理、城市基础设施投资建设项目、成套设备及其他商品贸易、扎拉矿业,以及工程项目管理咨询与劳务派遣	ir@scg.com.cn		www.scg.com.cn	CNE000000WR4
105886	600170	上海建工	2017-12-31	上海建工集团股份有限公司	土木工程建筑业	E48	上海市自由贸易试验区福山路33号	上海市虹口区东大名路666号	1998-06-15	1998-06-23	上海市	上海市	200080	李胜	021-35100838	021-55886222	ir@scg.com.cn	施栋	91310000631189305E	报告期内公司无收购及出售资产、吸收合并事项	121.5016766225	31.2493726834	121.5252927898	31.2387620384	徐征	从事各类土木建筑工程的总承包、设计、施工业务。国内贸易。	8904397728	房屋建筑工程总承包、专业施工、设计、装饰、园林绿化设计施工工程总承包、房地产开发经营、石料开采及混凝土加工制造、市政工程建设项目管理、城市基础设施投资建设项目、成套设备及其他商品贸易、扎拉矿业开采,以及工程项目管理咨询与劳务派遣。	ir@scg.com.cn		www.scg.com.cn	CNE000000WR4
105886	600170	上海建工	2018-12-31	上海建工集团股份有限公司	土木工程建筑业	E48	上海市自由贸易试验区福山路33号	上海市虹口区东大名路666号	1998-06-15	1998-06-23	上海市	上海市	200080	李胜	021-35100838	021-55886222	ir@scg.com.cn	施栋	91310000631189305E	报告期内公司无收购及出售资产、吸收合并事项	121.5016766225	31.2493726834	121.5252927898	31.2387620384	徐征	从事各类土木建筑工程的总承包、设计、施工业务。国内贸易。	8904397728	房屋建筑工程总承包、专业施工、设计、装饰、园林绿化设计施工工程总承包、房地产开发经营、石料开采及混凝土加工制造、市政工程建设项目管理、城市基础设施投资建设项目、成套设备及其他商品贸易、扎拉矿业开采,以及工程项目管理咨询与劳务派遣。	ir@scg.com.cn		www.scg.com.cn	CNE000000WR4
105857	600176	中国巨石	2018-12-31	中国巨石股份有限公司	非金属矿物制品业	C30	浙江省桐乡市梧桐街道文华南路669号	浙江省桐乡市梧桐街道文华南路669号	1999-04-16	1999-04-22	浙江省	桐乡市	314500	李畅	0573-88181888	0573-88181097	ir@jushi.com	沈国明	91330000710924531U	报告期内公司无收购及出售资产、吸收合并事项	120.537165627	30.6000461877	120.537378627	30.5997891877	曹江林	建筑材料、玻璃纤维及制品、防水材料、密封材料、装饰装修材料等。	3502306849	新材料的技术开发、技术服务;玻璃纤维及其制品、复合材料、建筑材料、工程塑料及制品、玻璃纤维相关原材料、化工原料(不含危险品及易制毒品)、设备及配件的批发;自有房屋的租赁;设备安装;信息技术服务;企业管理;资产管理。以上涉及许可证的凭证经营。(依法须经批准的项目,经相关部门批准后方可开展经营活动)	ir@jushi.com		www.jushi.com	CNE000000YM1
106032	600177	雅戈尔	2015-12-31	雅戈尔集团股份有限公司	房地产业	K70	浙江省宁波市鄞州区鄞县大道西段2号	浙江省宁波市鄞州区鄞县大道西段2号	1993-06-25	1998-11-19	浙江省	宁波市	315153	刘新宇	0574-87425136	0574-87425390	ir@youngor.com	冯隽	91330200704800698F	报告期内公司无收购及出售资产、吸收合并事项	121.6614196707	29.8050834579	121.5140957244	29.8192771429	李如成	服装制造、技术咨询；房地产开发。	2226611695	服装制造、技术咨询、房地产开发、项目投资、仓储运输、针纺织品、进 出口业务、电力电量及热量的销售。 主要产品为“雅戈尔”系列衬衫、西服以及其他服饰；太阳城、香湖丹堤、长岛花园、 御西湖（隐寓）、长风8号（雅仕名邸）、宁波紫玉花园（紫玉台花苑）、东海府（东海景花苑）、 苏州紫玉花园、御玺园、明洲.水乡邻里、都市南山、新东城（香湖湾二期）等房地产项目。	ir@youngor.com.cn		www.youngor.com	CNE000000XR2
106032	600177	雅戈尔	2016-12-31	雅戈尔集团股份有限公司	房地产业	K70	浙江省宁波市海曙区鄞县大道西段2号	浙江省宁波市海曙区鄞县大道西段2号	1993-06-25	1998-11-19	浙江省	宁波市	315153	刘新宇	0574-87425136	0574-87425390	ir@youngor.com	冯隽	91330200704800698F	重大资产和股权出售:1、出售银联商务有限公司(以下简称"银联商务")部分出资额2016年11月4日,公司与珠海横琴鼎建华新投资合伙企业(有限合伙)签订《股权转让协议》,以65,100.00万元的价格转让银联商务1,750万元出资额(占其注册资本3.49024%)(具体情况详见公司董事会临2016-058《关于出售银联商务有限公司部分股权的公告》)。本次股权转让并已完成工商变更登记手续本次股权转让完成后,公司仍持有银联商务750万元出资额(占其注册资本1.49582%);2、转让创业软件股份有限公司(简称"创业软件")部分股权2016年12月30日,公司与自然人张吕峥签订《股权转让协议》,以39.37元/股的价格转让创业软件无限售条件流通股份12,000,000股,占创业软件总股本的5.69%(具体内容详见公司于2016年12月31日披露的2016-069《关于减持创业软件股份有限公司股份…	121.5172945735	29.8181962232	121.5140957244	29.8192771429	李如成	服装制造、技术咨询；房地产开发。	2558176681	服装制造、技术咨询、房地产开发、项目投资、仓储运输、针纺织品、进出口业务、电力电量及热量的销售。公司主要产品为"雅戈尔"系列衬衫、西服以及其他服饰;太阳城、香湖丹堤、长岛花园、御西湖(隐寓)、长风8号(雅仕名邸)、宁波紫玉花园(紫玉台花苑)、东海府(东海景花苑)、苏州紫玉花园、御玺园、明洲.水乡邻里、都市南山、新东城(香湖湾二期)等房地产项目。	ir@youngor.com.cn		www.youngor.com	CNE000000XR2
106032	600177	雅戈尔	2017-12-31	雅戈尔集团股份有限公司	房地产业	K70	浙江省宁波市海曙区鄞县大道西段2号	浙江省宁波市海曙区鄞县大道西段2号	1993-06-25	1998-11-19	浙江省	宁波市	315153	刘新宇	0574-87425136	0574-87425390	ir@youngor.com	冯隽	91330200704800698F	重大资产和股权出售:转让创业软件股份有限公司(简称“创业软件”)部分股权2016年12月30日,公司与自然人张吕峥签订《股权转让协议》,以39.37元/股的价格转让创业软件无限售条件流通股份12,000,000股,占创业软件总股本的5.69%(具体内容详见公司于2016年12月31日披露的2016-069《关于减持创业软件股份有限公司股份的公告》)。本次股权转让已于2017年1月19日完成证券过户登记手续,相关投资收益32,335.58万元计入2017年损益。	121.5172945735	29.8181962232	121.5140957244	29.8192771429	雅戈尔	服装制造、技术咨询；房地产开发。	3581447353	服装制造、技术咨询、房地产开发、项目投资、仓储运输、针纺织品、进出口业务。公司主要产品为“雅戈尔”系列衬衫、西服以及其他服饰;太阳城、香湖丹堤、长岛花园、长风8号(雅仕名邸)、宁波紫玉花园(紫玉台花苑)、东海府(东海景花苑)、苏州紫玉花园、御玺园、明洲.水乡邻里、都市南山、新东城(香湖湾二期)等房地产项目。	ir@youngor.com.cn		www.youngor.com	CNE000000XR2
106032	600177	雅戈尔	2018-12-31	雅戈尔集团股份有限公司	房地产业	K70	浙江省宁波市海曙区鄞县大道西段2号	浙江省宁波市海曙区鄞县大道西段2号	1993-06-25	1998-11-19	浙江省	宁波市	315153	刘新宇	0574-87425136	0574-87425390	ir@youngor.com	冯隽	91330200704800698F	报告期内公司无收购及出售资产、吸收合并事项	121.5140957244	29.8192771429	121.5140957244	29.8192771429	李如成	服装制造、技术咨询；房地产开发。	3581447353	服装制造、技术咨询、房地产开发、项目投资、仓储运输、针纺织品、进出口业务。公司主要产品为“雅戈尔”系列衬衫、西服以及其他服饰;太阳城、宁波紫玉花园(紫玉台花苑)、东海府(东海景花苑)、苏州紫玉花园、明洲.水乡邻里、雅明花苑等房地产项目。	ir@youngor.com.cn		www.youngor.com	CNE000000XR2
103901	600188	兖州煤业	2015-12-31	兖州煤业股份有限公司	煤炭开采和洗选业	B06	山东省邹城市凫山南路298号	山东省邹城市凫山南路298号	1997-09-25	1998-04-01	山东省	邹城市	273500	靳庆彬	0537-5382319	0537-5383311	yzc@yanzhoucoal.com.cn	潘述田		报告期内公司无收购及出售资产、吸收合并事项	116.950579712	35.3983734456	116.950093712	35.3982914456	李希勇	煤炭的生产和销售。	4918400000	煤炭采选、销售，矿区自有铁路货物运输；公路货物运输；港口经营；矿山机械设备制造、销售、租赁、维修、安装、撤除；其他矿用材料的生产、销售；销售、租赁电器设备及销售相关配件；金属材料、机电产品、建筑材料、木材、橡胶制品的销售；煤矿综合科学技术服务；矿区内的房地产开发，房屋租赁，并提供餐饮、住宿等相关服务；煤矸石系列建材产品的生产、销售；焦炭、铁矿石的销售；货物和技术进出口；仓储；汽车修理；劳务派遣；物业管理服务；园林绿化；污水处理；供热；甲醇生产销售等。	yzc@yanzhoucoal.com.cn	01171	www.yanzhoucoal.com.cn	CNE000000WV6
103901	600188	兖州煤业	2016-12-31	兖州煤业股份有限公司	煤炭开采和洗选业	B06	山东省邹城市凫山南路298号	山东省邹城市凫山南路298号	1997-09-25	1998-04-01	山东省	邹城市	273500	靳庆彬	0537-5382319	0537-5383311	yzc@yanzhoucoal.com.cn	潘述田	91370000166122374N	报告期内公司无收购及出售资产、吸收合并事项	116.950579712	35.3983734456	116.950093712	35.3982914456	李希勇	煤炭的生产和销售。	4912016000	煤炭采选、销售,矿区自有铁路货物运输;公路货物运输;港口经营;矿山机械设备制造、销售、租赁、维修、安装、撤除;其他矿用材料的生产、销售;销售、租赁电器设备及销售相关配件;金属材料、机电产品、建筑材料、木材、橡胶制品的销售;煤矿综合科学技术服务;矿区内的房地产开发,房屋租赁,并提供餐饮、住宿等相关服务;煤矸石系列建材产品的生产、销售;焦炭、铁矿石的销售;货物和技术进出口;仓储;汽车修理;劳务派遣;物业管理服务;园林绿化;污水处理;供热;甲醇生产销售等。	yzc@yanzhoucoal.com.cn	01171	www.yanzhoucoal.com.cn	CNE000000WV6
103901	600188	兖州煤业	2017-12-31	兖州煤业股份有限公司	煤炭开采和洗选业	B06	山东省邹城市凫山南路298号	山东省邹城市凫山南路298号	1997-09-25	1998-04-01	山东省	邹城市	273500	靳庆彬	0537-5382319	0537-5383311	yzc@yanzhoucoal.com.cn	潘述田	91370000166122374N	报告期内公司无收购及出售资产、吸收合并事项	116.950579712	35.3983734456	116.950093712	35.3982914456	李希勇	煤炭的生产和销售。	4912016000	煤炭采选、销售,矿区自有铁路货物运输;公路货物运输;港口经营;矿山机械设备制造、销售、租赁、维修、安装、撤除;其他矿用材料的生产、销售;销售、租赁电器设备及销售相关配件;金属材料、机电产品、建筑材料、木材、橡胶制品的销售;煤矿综合科学技术服务;矿区内的房地产开发,房屋租赁,并提供餐饮、住宿等相关服务;煤矸石系列建材产品的生产、销售;焦炭、铁矿石的销售;货物和技术进出口;仓储;汽车修理;劳务派遣;物业管理服务;园林绿化;污水处理;供热;甲醇生产销售等。	yzc@yanzhoucoal.com.cn	01171	www.yanzhoucoal.com.cn	CNE000000WV6
103901	600188	兖州煤业	2018-12-31	兖州煤业股份有限公司	煤炭开采和洗选业	B06	山东省邹城市凫山南路298号	山东省邹城市凫山南路298号	1997-09-25	1998-04-01	山东省	邹城市	273500	靳庆彬	0537-5382319	0537-5383311	yzc@yanzhoucoal.com.cn	向瑛	91370000166122374N	报告期内公司无收购及出售资产、吸收合并事项	116.950579712	35.3983734456	116.950093712	35.3982914456	李希勇	煤炭的生产和销售。	4912016000	煤炭采选、销售(其中出口应按国家现行规定由拥有煤炭出口权的企业代理出口);以自有资金对外投资及投资咨询;委托经营;矿区自有铁路货物运输;公路货物运输;港口经营;矿山机械设备制造、销售、租赁、维修、安装、撤除;其他矿用材料的生产、销售;销售、租赁电器设备及销售相关配件;工程机械设备租赁;金属材料、机电产品、建筑材料、木材、橡胶制品的销售;冷补胶、肥皂、锚固剂、涂料的制造、销售;煤矿综合科学技术服务;矿井救护技术服务;矿区内的房地产开发,房屋租赁,并提供餐饮、住宿等相关服务;煤矸石系列建材产品的生产、销售;焦炭、铁矿石、有色金属的销售;货物和技术进出口;仓储(不含危险化学品);汽车修理;劳务派遣;物业管理服务;园林绿化;污水处理;供热;工业旅游;企业内部人员培训(救护队员技能培训、生产技术培训、安全培训);计量检定、理化检测、无损检测、分析化验、安全生产检测检验;企业管理;企业管理咨询;企业…	yzc@yanzhoucoal.com.cn	01171	www.yanzhoucoal.com.cn	CNE000000WV6
105860	600196	复星医药	2015-12-31	上海复星医药(集团)股份有限公司	医药制造业	C27	上海市曹杨路510号九楼	上海市宜山路1289号A楼	1994-01-14	1998-08-07	上海市	上海市	200233	周飚	021-33987870	021-33987871	ir@fosunpharma.com	董晓娴		重大资产和股权出售： 1、2015年2月5日，全资子公司复星平耀与杨峻珲、杨国民签订《股权转让协议》，约定复星 平耀向杨峻珲转让老娘舅23%股权。本次转让价格经各方协商确定为人民币6,900万元。本次转 让已于2015年3月11日完成工商变更。本次转让完成后，复星平耀不再持有老娘舅股权。报告 期内，老娘舅为上市公司贡献净利润为人民币-35.39 万元，上述转让产生的收益为人民币 1,251.94万元，资产出售为上市公司贡献的净利润占利润总额的0.37%。 2、2013年9月3日，全资子公司上海医诚与南洋肿瘤医院等签订《有关广州南洋肿瘤医院有限 公司投资协议》及其配套的股权转让协议、增资协议等文件。因南洋肿瘤医院2014年度经审计净 利润为负数，上海医诚依据协议相关规定，与南洋肿瘤医院、石维、石杰扬和于振洋于2015年7 月21日签订《关于解除投资协议及其他文件的协议书》，约定解除《有关广…	121.3961040316	31.1699805574	121.418616586	31.2375489027	陈启宇	药品制造，药品销售，医疗器械和医疗诊断产品等。	2314075364	生物化学产品、试剂、生物四技服务、生产销售自身开发的产品、仪器仪表、电子产品、计算机、化工原料(除危险品)、咨询服务；经营本企业自产产品及相关技术的出口业务，经营本企业生产、科研所需的原辅材料、机械设备、仪器仪表、零配件及相关技术的进口业务(企业经营涉及行政许可的凭许可证件经营)。	ir@fosunpharma.com	02196	www.fosunpharma.com	CNE000000X38
105860	600196	复星医药	2016-12-31	上海复星医药(集团)股份有限公司	医药制造业	C27	上海市浦东新区曹杨路510号9楼	上海市徐汇区宜山路1289号A楼	1994-01-14	1998-08-07	上海市	上海市	200233	董晓娴	021-33987870	021-33987871	ir@fosunpharma.com	陆璐		重大资产和股权出售:2016年4月12日,控股子公司新药研究与HENLIUS、SCOTTSHI-KAULIU、WEI-DONGJIANG、果宏生物、果友生物、果智生物签订《增资协议》,约定HENLIUS、SCOTTSHI-KAULIU、WEI-DONGJIANG、果宏生物、果友生物、果智生物共同向复宏汉霖增资669.6万美元。本次增资事宜已于2016年5月24日完成工商变更。本次增资完成后,新药研究持有复宏汉霖股权77.68%的股权。2016年5月27日,控股子公司新药研究与复宏汉霖、清科投资、华盖投资、华盖医疗、方正韩投、新建元生物、益飞投资及东方创投等签订《增资协议》,约定清科投资、华盖投资、华盖医疗、方正韩投、新建元生物、益飞投资及东方创投共同向复宏汉霖增资4,000万美元。本次增资事宜已于2016年6月30日完成工商变更。本次增资完成后,新药研究持有复宏汉霖股权约71.33855…	121.5441343033	31.221163713	121.418616586	31.2375489027	陈启宇	药品制造，药品销售，医疗器械和医疗诊断产品等。	2314075364	从事药品制造与研发、医疗服务、医疗器械与医学诊断、医药分销与零售,其中以药品制造与研发为主,并以医疗服务为发展重点。	ir@fosunpharma.com	02196	www.fosunpharma.com	CNE000000X38
105860	600196	复星医药	2017-12-31	上海复星医药(集团)股份有限公司	医药制造业	C27	上海市曹杨路510号9楼	上海市宜山路1289号A楼	1994-01-14	1998-08-07	上海市	上海市	200233	董晓娴	021-33987870	021-33987871	ir@fosunpharma.com	陆璐		重大资产和股权出售:2017年8月10日,复星医药与吉林大药房签订《股份转让协议》,约定复星医药向吉林大药房转让其所持有的永安复星的6,900万股股份,占永安复星注册资本的46%,转让价格为人民币13,535.74万元。本次交易价格基于永安复星截至2016年12月31日净资产评估值,由各方协商确定。本次交易尚待交割。本次交易完成后,复星医药将不再持有永安复星股权。报告期内,永安复星为上市公司贡献净利润人民币8,016万元,占上市公司利润总额的1.97%。永安复星主营药品销售。	121.3961040316	31.1699805574	121.418616586	31.2375489027	陈启宇	药品制造，药品销售，医疗器械和医疗诊断产品等。	2495131045	生物化学产品、试剂、生物四技服务、生产销售自身开发的产品、仪器仪表、电子产品、计算机、化工原料(除危险品)、咨询服务;经营本企业自产产品及相关技术的出口业务,经营本企业生产、科研所需的原辅材料、机械设备、仪器仪表、零配件及相关技术的进口业务(企业经营涉及行政许可的凭许可证件经营)。	ir@fosunpharma.com	02196	www.fosunpharma.com	CNE000000X38
105860	600196	复星医药	2018-12-31	上海复星医药(集团)股份有限公司	医药制造业	C27	上海市曹杨路510号9楼	上海市宜山路1289号A楼	1994-01-14	1998-08-07	上海市	上海市	200233	董晓娴	021-33987870	021-33987871	ir@fosunpharma.com	陆璐		重大资产和股权出售:1、2018年4月4日,控股子公司复星实业与Ambrx Biopharma、HOPU、MHC等签订《Shares Transfer Agreement》,约定复星实业向HOPU、MHC转让其持有的Ambrx Biopharma共计34,657,700股股份。本次转让价格经各方协商确定共计约3,465.77万美元。本次转让已于2018年5月完成交割。本次转让完成后,复星实业尚持有Ambrx Biopharma9.11%的股权。报告期内,Ambrx Biopharma为上市公司贡献净利润为人民币7,553万元,本次转让产生的收益为人民币7,553万元,资产出售为上市公司贡献的净利润占利润总额的2.11%。2、2018年5月24日,控股子公司复星实业与BioNote、Innocence等签订《SharesPurchaseAgreement》,约定复星实业向BioNote、I…	121.3961040316	31.1699805574	121.418616586	31.2375489027	陈启宇	药品制造，药品销售，医疗器械和医疗诊断产品等。	2563060895	生物化学产品、试剂、生物四技服务、生产销售自身开发的产品、仪器仪表、电子产品、计算机、化工原料(除危险品)、咨询服务;经营本企业自产产品及相关技术的出口业务,经营本企业生产、科研所需的原辅材料、机械设备、仪器仪表、零配件及相关技术的进口业务(企业经营涉及行政许可的凭许可证件经营)。	ir@fosunpharma.com	02196	www.fosunpharma.com	CNE000000X38
105745	600208	新湖中宝	2015-12-31	新湖中宝股份有限公司	房地产业	K70	浙江省嘉兴市中山路禾兴路口	浙江省杭州市西溪路128号新湖商务大厦11层	1993-02-23	1999-06-23	浙江省	嘉兴市	310007	虞迪锋	0571-87395003	0571-87395052	yudf@600208.net	高莉		重大资产和股权出售: 根据本公司第八届董事会第四十七次会议决议，并经中国保险监督管理委员会《关于锦泰财 产保险股份有限公司股权转让的批复》（保监许可〔2015〕102号）核准，公司将持有的锦泰财 产保险股份有限公司2亿股以人民币2.7亿元的价格转让，本期已收到全部股权转让款，实现损 益104,094,841.53元，占利润总额的6.97%。	120.1387680655	30.2702528428	120.5729338351	30.6327578248	林俊波	实业投资，百货、针纺织品、五金交电、化工产品等。	9099670428	煤炭（《煤炭经营资格证》有效期至2016年6月30日）的销售。实业投 资，百货、针纺织品、五金交电、石化产品、化工产品（不含化学危险品）、家俱、电子计算机 及配件、建筑材料、金属材料、木竹材、电子产品、通讯设备（不含无线）、机电设备、黄金饰 品、珠宝玉器的销售，经营进出口业务、投资管理，信息咨询服务，国内广告设计制作发布，代 理广告业务，电子计算机网络系统及软件的研发、技术服务，房地产中介服务。（依法须经批准 的项目，经相关部门批准后方可开展经营活动。）	xhzb@600208.net		www.600208.net	CNE000000ZH8
105745	600208	新湖中宝	2016-12-31	新湖中宝股份有限公司	房地产业	K70	浙江省嘉兴市中山路禾兴路口	浙江省杭州市西溪路128号新湖商务大厦11层	1993-02-23	1999-06-23	浙江省	嘉兴市	310007	虞迪锋	0571-87395003	0571-87395052	yudf@600208.net	高莉	91330000142941287T	重大资产和股权出售:根据本公司第九届董事会第二十一次会议决议,公司将全资子公司江苏新湖宝华置业有限公司65%的股权以人民币71,000万元转让给安信信托股份有限公司,本期已收到股权转让价款40,000万元,剩余股权转让款项将于标的股权完成相关工商变更登记后六个月内支付完毕。本次交易产生股权处置投资收益4.96亿元,另根据《企业会计准则》相关核算规定,对剩余股权按公允价值重新计量,相应产生投资收益2.67亿元,两项收益合计7.64亿元,占利润总额的12.60%。	120.1387680655	30.2702528428	120.5729338351	30.6327578248	林俊波	实业投资，百货、针纺织品、五金交电、化工产品等。	8599343536	房地产开发、金融投资、商业贸易、矿产勘探开采等。主要产品或提供的劳务:商品房。	xhzb@600208.net		www.600208.net	CNE000000ZH8
105745	600208	新湖中宝	2017-12-31	新湖中宝股份有限公司	房地产业	K70	浙江省嘉兴市中山路禾兴路口	浙江省杭州市西溪路128号新湖商务大厦11层	1993-02-23	1999-06-23	浙江省	嘉兴市	310007	虞迪锋	0571-87395003	0571-87395052	yudf@600208.net	高莉	91330000142941287T	重大资产和股权出售:经公司第九届董事会第三十一次会议和2017年第三次临时股东大会审议通过,公司与新湖集团签署《新湖期货有限公司股权转让协议》,新湖集团以9,600万元受让公司所持有的新湖期货8%的股权。截至报告日,该股权转让事宜已经中国证监督管理委员会上海监管局核准,公司已收到新湖期货股权转让款4,896万元,并办妥新湖期货的工商变更登记手续。同时,公司全资子公司浙江允升投资集团有限公司(以下简称允升投资)与新湖集团签署《杭州兴和投资发展有限公司股权转让协议》,新湖集团以40,000万元作价受让允升投资所持有的杭州兴和投资发展有限公司(以下简称“兴和投资”)100%的股权。期内,允升投资已收到兴和投资股权转让款20,400万元,并办妥兴和投资的工商变更登记手续。本次交易产生的股权处置投资收益2.57亿元,另根据《企业会计准则》相关核算规定,对剩余股权按公允价值重新计量,相应产生投资收益…	120.1387680655	30.2702528428	120.5729338351	30.6327578248	林俊波	实业投资，百货、针纺织品、五金交电、化工产品等。	8599343536	房地产开发、金融投资、商业贸易、矿产勘探开采等。主要产品或提供的劳务:商品房。	xhzb@600208.net		www.600208.net	CNE000000ZH8
105745	600208	新湖中宝	2018-12-31	新湖中宝股份有限公司	房地产业	K70	浙江省嘉兴市中山路禾兴路口	浙江省杭州市西溪路128号新湖商务大厦11层	1993-02-23	1999-06-23	浙江省	嘉兴市	310007	虞迪锋	0571-87395003	0571-87395052	yudf@600208.net	高莉	91330000142941287T	报告期内公司无收购及出售资产、吸收合并事项	120.1387680655	30.2702528428	120.5729338351	30.6327578248	林俊波	实业投资，百货、针纺织品、五金交电、化工产品等。	8599343536	房地产开发、金融投资、商业贸易、矿产勘探开采等。主要产品或提供的劳务:商品房。	xhzb@600208.net		www.600208.net	CNE000000ZH8
105895	600219	南山铝业	2017-12-31	山东南山铝业股份有限公司	有色金属冶炼及压延加工业	C32	山东省龙口市东江镇前宋村	山东省龙口市东江镇南山村	1993-03-18	1999-12-23	山东省	龙口市	265706	隋冠男	0535-8616188	0535-8616230	suiguannan@nanshan.com.cn	王仁权	913700007058303114	重大资产和股权出售:公司于2017年7月25日召开第九届董事会第二次会议审议通过了《关于转让龙口新成并购投资合伙企业(有限合伙)认缴出资份额暨关联交易的议案》,同意公司将新成并购27.78%的认缴出资份额(认缴出资额5,000万元,实缴出资额500万元人民币)转让给深圳前海南山金融发展有限公司,转让价格为人民币500万元。	120.4902120104	37.5942146937	120.4778260957	37.6461206507	宋昌明	许可证范围内电力生产、天然气销售。	9251102895	许可证范围内电力生产(有效期限以许可证为准);天然气销售(限分支机构经营);锻造产品、石墨和炭素制品、铝及铝合金制品开发、生产、加工、销售;批准范围内的自营进出口、进料加工和“三来一补”业务;装饰装修及铝合金结构制品、铝门窗的安装(须凭资质证书经营);模具设计与制造;燃气灶具、金属材料、机械设备销售;铝合金压力加工工程和技术研究开发、技术咨询、技术服务;检验测试。(依法须经批准的项目,经相关部门批准后方可开展经营活动)。	nanshan@public.ytptt.sd.cn		www.600219.com.cn	CNE000001139
105895	600219	南山铝业	2018-12-31	山东南山铝业股份有限公司	有色金属冶炼及压延加工业	C32	山东省龙口市东江镇前宋村	山东省龙口市东江镇前宋村	1993-03-18	1999-12-23	山东省	龙口市	265706	隋冠男	0535-8616188	0535-8616230	suiguannan@nanshan.com.cn	王仁权	913700007058303114	报告期内公司无收购及出售资产、吸收合并事项	120.4778260957	37.6461206507	120.4778260957	37.6461206507	程仁策	许可证范围内电力生产、天然气销售。	11950481520	许可证范围内电力生产(有效期限以许可证为准);天然气销售(限分支机构经营);锻造产品、石墨和炭素制品、铝及铝合金制品开发、生产、加工、销售;批准范围内的自营进出口、进料加工和“三来一补”业务;装饰装修及铝合金结构制品、铝门窗的安装(须凭资质证书经营);模具设计与制造;燃气灶具、金属材料、机械设备、塑料制品、化工产品(不含危险化学品)销售;包装箱、托盘、玻纤增强尼龙隔热条生产、销售;铝合金压力加工工程和技术研究开发、技术咨询、技术服务;检验测试。(依法须经批准的项目,经相关部门批准后方可开展经营活动)。	nanshan@public.ytptt.sd.cn		www.600219.com.cn	CNE000001139
105897	600221	海航控股	2015-12-31	海南航空股份有限公司	航空运输业	G56	海南省海口市国兴大道7号海航大厦	海南省海口市国兴大道7号海航大厦	1989-10-18	1997-06-26	海南省	海口市	570203	李瑞	0898-66739961	0898-66739960	hhgfdshmsbgs@hnair.com	张大伟	914600006200251612	报告期内公司无收购及出售资产、吸收合并事项	110.3449756651	20.0179181811	110.3451212228	20.0189274524	辛笛	经营经批准的国内航空客货运输业务、周边国家和地区公务包机飞行业务。	12182181790	国内国际航空客、货运输业务及与航空运输有关的其他相关服务	webmaster@hnair.com	900945	www.hnair.com	CNE0000011C5
105897	600221	海航控股	2016-12-31	海南航空股份有限公司	航空运输业	G56	海南省海口市国兴大道7号海航大厦	海南省海口市国兴大道7号海航大厦	1989-10-18	1997-06-26	海南省	海口市	570203	李瑞	0898-66739961	0898-66739960	hhgfdshmsbgs@hnair.com	张大伟	914600006200251612	重大资产和股权出售:公司于2016年11月25日第八届董事会第一次会议及2016年12月13日2016年第六次临时股东大会审议通过《关于出售4架E145LR飞机的报告》。公司向天航控股有限责任公司出售4架E145LR飞机,共计44,453.1672万元人民币。截止目前,已完成1架飞机的出售,剩余3架划入持有待售资产核算。本年度内公司无重大股权出售。	110.3449756651	20.0179181811	110.3451212228	20.0189274524	谢皓明	经营经批准的国内航空客货运输业务、周边国家和地区公务包机飞行业务。	16806120	经批准的国内国际航空客、货运输业务及与航空运输有关的其他相关服务。	webmaster@hnair.com	900945	www.hnair.com	CNE0000011C5
105897	600221	海航控股	2017-12-31	海南航空控股股份有限公司	航空运输业	G56	海南省海口市国兴大道7号海航大厦	海南省海口市国兴大道7号海航大厦	1989-10-18	1997-06-26	海南省	海口市	570203	武强	0898-66739961	0898-66739960	hhgfdshmsbgs@hnair.com	张大伟	914600006200251612	重大资产和股权出售:公司2017年3月28日第八届董事会第三次会议及2017年4月18日2016年年度股东大会审议通过《关于出售2架B737-800飞机的报告》。公司向扬子江航空(现更名为金鹏航空)出售2架B737-800飞机,交易金额92,133.07万元人民币。公司已于2017年6月份完成飞机转让。公司2017年12月16日公告《海南航空控股股份有限公司关于控股子公司中国新华航空集团有限公司出售资产暨关联交易的公告》。公司控股子公司新华航空将其持有的位于北京市顺义区货运北路3号配餐楼内的航食生产类机器设备转让给北京新华空港航空食品有限公司,交易金额共计5,174.38万元人民币。公司已于2017年12月份完成机器设备转让。	110.3449756651	20.0179181811	110.3451212228	20.0189274524	包启发	经营经批准的国内航空客货运输业务、周边国家和地区公务包机飞行业务。	16806120000	经批准的国内国际航空客、货运输业务及与航空运输有关的其他相关服务。	webmaster@hnair.com	900945	www.hnair.com	CNE0000011C5
105897	600221	海航控股	2018-12-31	海南航空控股股份有限公司	航空运输业	G56	海南省海口市国兴大道7号海航大厦	海南省海口市国兴大道7号海航大厦	1989-10-18	1997-06-26	海南省	海口市	570203	李晓峰	0898-66739961	0898-66739960	hhgfdshmsbgs@hnair.com	张大伟	914600006200251612	重大资产和股权出售:公司2018年3月22日第八届董事会第十九次会议及2018年4月12日2017年年度股东大会审议通过了《关于出售2架B767飞机及1台备用发动机暨关联交易的公告》,同意公司以及控股子公司新华航空向云南祥鹏投资有限公司分别出售各自所有的2架B767飞机及1台备用发动机,交易金额共计51,990.65万元人民币。公司已于2018年4月完成飞机及发动机转让。公司2018年3月22日第八届董事会第十九次会议及2018年4月12日2017年年度股东大会审议通过了《关于出售2架B737-400飞机暨关联交易的报告》,同意公司向天津货运航空有限公司出售2架B737-400飞机,共计1,450万元美金。公司已于2018年4月完成飞机及发动机转让。2018年4月,公司将持有AzulS.A.(Azul航空)优先股股权中20.00%的部分(14,534,502股优先股)转让给UnitedC…	110.3449756651	20.0179181811	110.3451212228	20.0189274524	谢皓明	经营经批准的国内航空客货运输业务、周边国家和地区公务包机飞行业务。	16806120000	经批准的国内国际航空客、货运输业务及与航空运输有关的其他相关服务。	webmaster@hnair.com	900945	www.hnair.com	CNE0000011C5
105928	600233	圆通速递	2017-12-31	圆通速递股份有限公司	邮政业	G60	辽宁省大连市杨树房经济开发小区	上海市青浦区华新镇华徐公路3029弄18号	1992-12-22	2000-06-08	辽宁省	大连市	201705	朱锐	021-69213602	021-59832913	ir@yto.net.cn	张龙武	912102002412697996	报告期内公司无收购及出售资产、吸收合并事项	121.2548487005	31.2144585018	122.2426316941	39.3957326443	喻会蛟	综合性快递物流服务	2825477587	国内、国际快递;从事道路、航空、水路国际货物运输代理业务;普通货物仓储;国内航空运输代理;汽车租赁服务;供应链管理服务。(依法须经批准的项目,经相关部门批准后方可开展经营活动)。			www.yto.cn	CNE0000012J8
105928	600233	圆通速递	2018-12-31	圆通速递股份有限公司	邮政业	G60	辽宁省大连市杨树房经济开发小区	上海市青浦区华新镇华徐公路3029弄18号	1992-12-22	2000-06-08	辽宁省	大连市	201705	朱锐	021-69213602	021-59832913	ir@yto.net.cn	张龙武	912102002412697996	报告期内公司无收购及出售资产、吸收合并事项	121.2548487005	31.2144585018	122.2426316941	39.3957326443	喻会蛟	综合性快递物流服务	2828647251	国内、国际快递;从事道路、航空、水路国际货物运输代理业务;普通货物仓储;国内航空运输代理;汽车租赁服务;供应链管理服务。(依法须经批准的项目,经相关部门批准后方可开展经营活动)。			www.yto.net.cn	CNE0000012J8
105755	600252	中恒集团	2015-12-31	广西梧州中恒集团股份有限公司	医药制造业	C27	广西壮族自治区梧州市工业园区工业大道1号第1幢	广西壮族自治区梧州市工业园区工业大道1号	1993-07-28	2000-11-30	广西壮族自治区	梧州市	543000	彭伟民	0774-3939128	0774-3939053	pwm680@tom.com	童依虹		重大资产和股权出售: 报告期内公司分别于2015年4至5月份间通过大宗交易五次减持国海证券股票累 计21,710,000股，成交均价20.64元/股,成交金额总计448,071,500元，取得税前 投资收益总计3.84亿元。	111.3212424946	23.5234053946	111.3203385646	23.5280129582	欧阳静波	制药、房地产开发与经营、电力、建筑施工、酒店旅游服务等。	3475107147	药品生产与销售、食品加工与销售、房地 产开发、项目投资。	zhongheng@wz-zhongheng.com		www.wz-zhongheng.com	CNE0000015F9
105948	600256	广汇能源	2015-12-31	广汇能源股份有限公司	石油和天然气开采业	B07	新疆维吾尔自治区乌鲁木齐经济技术开发区上海路16号	新疆维吾尔自治区乌鲁木齐市新华北路165号中天广场27层	1999-04-10	2000-05-26	新疆维吾尔自治区	乌鲁木齐市	830002	倪娟	0991-2365211	0991-8637008	nijuan@xjghjt.com	杨雪清	9165000071296668XK	报告期内公司无收购及出售资产、吸收合并事项	87.6085185916	43.7997011502	87.5340884508	43.8799675695	宋东升	公司主营业务涉及液化天然气、现代物流、住宅消费服务、石材和化学建材五个行业。	5221424684	液化天然气、石油和天然气、煤炭和煤化工、清 洁燃料汽车应用、加注站建设等项目的投资;燃气管网工程的投资;液化天然气的生产销售(以 资质证书范围经营);燃气应用技术的研究开发;煤炭批发经营;危险货物运输(具体以道路运输 经营许可证为准,只限其汽车运输分公司经营);仓储;货物运输;软件工程;经济信息咨询;互 联网工程开发、设计;网上物资购销及相应的网上信息发布;物流配送;消防器材、通讯器材(专 项审批除外)、计算机及网络产品、机电产品、化工产品(专项审批除外)的销售;电子商务、互 联网工程开发及设计;经营进出口业务(国家限定公司经营和禁止进出口的商品除外)。	guanghuigufen@xjghjt.com		www.xjguanghui.com	CNE0000012G4
105948	600256	广汇能源	2016-12-31	广汇能源股份有限公司	石油和天然气开采业	B07	新疆维吾尔自治区乌鲁木齐市经济技术开发区上海路16号	新疆维吾尔自治区乌鲁木齐市新华北路165号中天广场27层	1999-04-10	2000-05-26	新疆维吾尔自治区	乌鲁木齐市	830002	倪娟	0991-2365211	0991-8637008	nijuan@xjghjt.com	祁娟	9165000071296668XK	报告期内公司无收购及出售资产、吸收合并事项	87.6085185916	43.7997011502	87.5340884508	43.8799675695	宋东升	公司主营业务涉及液化天然气、现代物流、住宅消费服务、石材和化学建材五个行业。	5221424684	液化天然气、石油和天然气、煤炭和煤化工、清洁燃料汽车应用、加注站建设等项目的投资;燃气管网工程的投资;液化天然气的生产销售(以资质证书范围经营);燃气应用技术的研究开发;煤炭批发经营;危险货物运输(具体以道路运输经营许可证为准,只限其汽车运输分公司经营);仓储;货物运输;软件工程;经济信息咨询;互联网工程开发、设计;网上物资购销及相应的网上信息发布;物流配送;消防器材、通讯器材(专项审批除外)、计算机及网络产品、机电产品、化工产品(专项审批除外)的销售;电子商务、互联网工程开发及设计;经营进出口业务(国家限定公司经营和禁止进出口的商品除外)。	guanghuigufen@xjghjt.com		www.xjguanghui.com	CNE0000012G4
105138	600271	航天信息	2015-12-31	航天信息股份有限公司	计算机、通信和其他电子设备制造业	C39	北京市海淀区杏石口路甲18号	北京市海淀区杏石口路甲18号航天信息园	2000-11-01	2003-07-11	北京市	北京市	100195	陈仕俗	010-88896053	010-88896055	chss@aisino.com	朱凯		报告期内公司无收购及出售资产、吸收合并事项	116.2578472903	39.9465903667	116.2586442903	39.9454483667	时旸	国家金税工程的增值税专用发票防伪税控系统及其配套服务、金卡工程和金盾工程的相关产品以及计算机系统集成项目等。	923400789	第二类增值电信业务中的呼叫中心业务（增值电信业务经营许可证有效期至2020年05月07日）；计算机软件的技术开发、技术咨询和技术服务；企业管理咨询；计算机数据库服务；计算机软件、打印纸的销售；电子及通信设备、计算机及外部设备、智能机电产品、财税专用设备的研制、生产、销售；信息安全技术、信息技术、网络及终端技术、多媒体技术、工业自动化控制技术、环保技术、生物工程技术的开发、转让、咨询、培训；化工材料（不含危险化学品）销售；经济信息咨询；进出口业务；房屋租赁业务；智能卡及电子标签的研制、生产、销售；电子产品专业设备的研制、生产、销售、技术服务；物联网及传感网相关技术研发、生产、销售及服务；有线及无线通讯终端产品和个人数字终端产品的研发、生产和销售；农业机械设备研发、销售和服务；技术服务、售后服务。（依法须经批准的项目，经相关部门批准后依批准的内容开展经营活动。）	stock@aisino.com		www.aisino.com	CNE000001FB1
105138	600271	航天信息	2016-12-31	航天信息股份有限公司	计算机、通信和其他电子设备制造业	C39	北京市海淀区杏石口路甲18号	北京市海淀区杏石口路甲18号航天信息园	2000-11-01	2003-07-11	北京市	北京市	100195	陈仕俗	010-88896053	010-88896055	chss@aisino.com	朱凯	91110000710927388B	报告期内公司无收购及出售资产、吸收合并事项	116.2578472903	39.9465903667	116.2586442903	39.9454483667	时旸	国家金税工程的增值税专用发票防伪税控系统及其配套服务、金卡工程和金盾工程的相关产品以及计算机系统集成项目等。	1846811300	计算机软件的技术开发与销售、电子及通信设备、计算机及外部设备、智能机电产品、财税专用设备的研制、生产、销售;信息安全技术、信息技术、网络及终端技术、多媒体技术、工业自动化控制技术、环保技术、生物工程技术的开发、转让、咨询、培训;智能卡及电子标签的研制、生产、销售。电子产品专业设备的研制、生产、销售、技术服务;物联网及传感网相关技术研发、生产、销售及服务;有线及无线通讯终端产品和个人数字终端产品的研发、生产和销售;农业机械设备研发、销售和服务。提供的服务主要有:技术咨询和技术服务、企业管理咨询、计算机数据库服务。销售或转让的产品主要有:计算机软件、打印纸、生产、信息安全技术、信息技术、网络及终端技术、多媒体技术、工业自动化控制技术、环保技术、生物工程技术。	stock@aisino.com		www.aisino.com	CNE000001FB1
105138	600271	航天信息	2017-12-31	航天信息股份有限公司	计算机、通信和其他电子设备制造业	C39	北京市海淀区杏石口路甲18号	北京市海淀区杏石口路甲18号航天信息园	2000-11-01	2003-07-11	北京市	北京市	100195	陈仕俗	010-88896053	010-88896055	chss@aisino.com	朱凯	91110000710927388B	报告期内公司无收购及出售资产、吸收合并事项	116.2578472903	39.9465903667	116.2586442903	39.9454483667	时旸	国家金税工程的增值税专用发票防伪税控系统及其配套服务、金卡工程和金盾工程的相关产品以及计算机系统集成项目等。	1862851827	计算机软件的技术开发与销售、电子及通信设备、计算机及外部设备、智能机电产品、财税专用设备的研制、生产、销售;信息安全技术、信息技术、网络及终端技术、多媒体技术、工业自动化控制技术、环保技术、生物工程技术的开发、转让、咨询、培训;智能卡及电子标签的研制、生产、销售。电子产品专业设备的研制、生产、销售、技术服务;物联网及传感网相关技术研发、生产、销售及服务;有线及无线通讯终端产品和个人数字终端产品的研发、生产和销售;农业机械设备研发、销售和服务。提供的服务主要有:技术咨询和技术服务、企业管理咨询、计算机数据库服务。销售或转让的产品主要有:计算机软件、打印纸、生产、信息安全技术、信息技术、网络及终端技术、多媒体技术、工业自动化控制技术、环保技术、生物工程技术。	stock@aisino.com		www.aisino.com	CNE000001FB1
105138	600271	航天信息	2018-12-31	航天信息股份有限公司	计算机、通信和其他电子设备制造业	C39	北京市海淀区杏石口路甲18号	北京市海淀区杏石口路甲18号航天信息园	2000-11-01	2003-07-11	北京市	北京市	100195					朱凯	91110000710927388B	重大资产和股权出售:六届董事会第三十二次会议审议通过了“关于公开挂牌转让控股子公司上海爱信诺航芯电子科技有限公司部分股权的议案”。公司已通过产权交易所公开挂牌的方式转让上海爱信诺航芯电子科技有限公司35%股权,成交价为17500万元。	116.2578472903	39.9465903667	116.2586442903	39.9454483667	於亮	国家金税工程的增值税专用发票防伪税控系统及其配套服务、金卡工程和金盾工程的相关产品以及计算机系统集成项目等。	1862514920	计算机软件的技术开发与销售、电子及通信设备、计算机及外部设备、智能机电产品、财税专用设备的研制、生产、销售;信息安全技术、信息技术、网络及终端技术、多媒体技术、工业自动化控制技术、环保技术、生物工程技术的开发、转让、咨询、培训;智能卡及电子标签的研制、生产、销售。电子产品专业设备的研制、生产、销售、技术服务;物联网及传感网相关技术研发、生产、销售及服务;有线及无线通讯终端产品和个人数字终端产品的研发、生产和销售;农业机械设备研发、销售和服务。提供的服务主要有:技术咨询和技术服务、企业管理咨询、计算机数据库服务。销售或转让的产品主要有:计算机软件、打印纸、生产、信息安全技术、信息技术、网络及终端技术、多媒体技术、工业自动化控制技术、环保技术、生物工程技术。	stock@aisino.com		www.aisino.com	CNE000001FB1
105141	600276	恒瑞医药	2015-12-31	江苏恒瑞医药股份有限公司	医药制造业	C27	江苏省连云港市经济技术开发区黄河路38号	江苏省连云港市经济技术开发区昆仑山路7号	1997-04-28	2000-10-18	江苏省	连云港市	222000	戴洪斌	0518-81220678	0518-85453845	600276@hrs.com.cn	刘笑含	9132070070404786XB	报告期内公司无收购及出售资产、吸收合并事项	119.3472346933	34.6983469338	119.3485746933	34.7004489338	孙飘扬	片剂、针剂、胶囊、粉针等制剂的开发、制造和销售。	1956499106	片剂(含抗肿瘤药)、口服溶液剂、混悬剂、原料药(含抗肿瘤药、含麻醉 药品)、精神药品、软胶囊剂(含抗肿瘤药)、冻干粉针剂(含抗肿瘤药)、粉针剂(抗肿瘤药、头孢 菌素类)、大容量注射剂(含多层共挤输液袋、含抗肿瘤药)、小容量注射剂(含抗肿瘤药、含精神 药品、含非最终灭菌)、生物工程制品（聚乙二醇重组人粒细胞刺激因子注射液）、硬胶囊剂(含抗 肿瘤药)、颗粒剂（抗肿瘤药)、粉雾剂、膜剂、凝胶剂、乳膏剂的制造，一般化工产品的销售； 自营和代理各类商品及技术的进出口业务，但国家限定公司经营或禁止进出口的商品和技术除外	600276@hrs.com.cn		www.hrs.com.cn	CNE0000014W7
105141	600276	恒瑞医药	2016-12-31	江苏恒瑞医药股份有限公司	医药制造业	C27	江苏连云港市经济技术开发区黄河路38号	江苏连云港市经济技术开发区昆仑山路7号	1997-04-28	2000-10-18	江苏省	连云港市	222000	刘笑含	0518—81220012	0518—85453845	liuxiaohan@hrs.com.cn		9132070070404786XB	报告期内公司无收购及出售资产、吸收合并事项	119.3472346933	34.6983469338	119.3485746933	34.7004489338	孙飘扬	片剂、针剂、胶囊、粉针等制剂的开发、制造和销售。	2347459674	公司主营业务涉及药品研发、生产和销售,主要产品涵盖抗肿瘤药、手术麻醉类用药、特殊输液、造影剂、心血管药等众多领域。根据营业执照,公司主营业务是片剂(含抗肿瘤药)、口服溶液剂、混悬剂、原料药、精神药品、软胶囊剂(含抗肿瘤药)、冻干粉针剂(含抗肿瘤药)、粉针剂(抗肿瘤药、头孢菌素类)、吸入粉雾剂、口服混悬剂、口服乳剂、大容量注射剂(含多层共挤输液袋、含抗肿瘤药)、小容量注射剂(含抗肿瘤药、含非最终灭菌),生物工程制品(聚乙二醇重组人粒细胞刺激因子注射液)、硬胶囊剂(含抗肿瘤药)、颗粒剂(抗肿瘤药)、粉雾剂、膜剂、凝胶剂、乳膏剂的制造;中药前处理及提取;一般化工产品的销售;自营和代理各类商品及技术的进出口业务,但国家限定公司经营或禁止进出口的商品和技术除外。	600276@hrs.com.cn		www.hrs.com.cn	CNE0000014W7
105141	600276	恒瑞医药	2017-12-31	江苏恒瑞医药股份有限公司	医药制造业	C27	江苏省连云港市经济技术开发区黄河路38号	江苏省连云港市经济技术开发区昆仑山路7号	1997-04-28	2000-10-18	江苏省	连云港市	222000	刘笑含	0518-81220983	0518-85453845	liuxiaohan@hrs.com.cn		9132070070404786XB	报告期内公司无收购及出售资产、吸收合并事项	119.3472346933	34.6983469338	119.3485746933	34.7004489338	孙飘扬	片剂、针剂、胶囊、粉针等制剂的开发、制造和销售。	2832648038	片剂(含抗肿瘤药)、口服溶液剂、混悬剂、原料药、精神药品、软胶囊剂(含抗肿瘤药)、冻干粉针剂(含抗肿瘤药)、粉针剂(抗肿瘤药、头孢菌素类)、吸入粉雾剂、口服混悬剂、口服乳剂、大容量注射剂(含多层共挤输液袋、含抗肿瘤药)、小容量注射剂(含抗肿瘤药、含非最终灭菌)、生物工程制品(聚乙二醇重组人粒细胞刺激因子注射液)、硬胶囊剂(含抗肿瘤药)、颗粒剂(抗肿瘤药)、粉雾剂、膜剂、凝胶剂、乳膏剂的制造;中药前处理及提取;一般化工产品的销售;自营和代理各类商品及技术的进出口业务,但国家限定公司经营或禁止进出口的商品和技术除外。	600276@hrs.com.cn		www.hrs.com.cn	CNE0000014W7
105141	600276	恒瑞医药	2018-12-31	江苏恒瑞医药股份有限公司	医药制造业	C27	江苏省连云港市经济技术开发区黄河路38号	江苏省连云港市经济技术开发区昆仑山路7号	1997-04-28	2000-10-18	江苏省	连云港市	222000	刘笑含	0518-81220012	0518-85453845	liuxiaohan@hrs.com.cn		9132070070404786XB	报告期内公司无收购及出售资产、吸收合并事项	119.3472346933	34.6983469338	119.3485746933	34.7004489338	孙飘扬	片剂、针剂、胶囊、粉针等制剂的开发、制造和销售。	3682442449	片剂(含抗肿瘤药)、口服溶液剂、混悬剂、原料药、精神药品、软胶囊剂(含抗肿瘤药)、冻干粉针剂(含抗肿瘤药)、粉针剂(抗肿瘤药、头孢菌素类)、吸入粉雾剂、口服混悬剂、口服乳剂、大容量注射剂(含多层共挤输液袋、含抗肿瘤药)、小容量注射剂(含抗肿瘤药、含非最终灭菌)、生物工程制品(聚乙二醇重组人粒细胞刺激因子注射液)、硬胶囊剂(含抗肿瘤药)、颗粒剂(抗肿瘤药)、粉雾剂、膜剂、凝胶剂、乳膏剂的制造;中药前处理及提取;一般化工产品的销售;自营和代理各类商品及技术的进出口业务,但国家限定公司经营或禁止进出口的商品和技术除外。	600276@hrs.com.cn		www.hrs.com.cn	CNE0000014W7
105767	600297	广汇汽车	2016-12-31	广汇汽车服务股份公司	零售业	F52	辽宁省大连市甘井子区营升路9号	上海市闵行区虹莘路3998号	1999-07-30	2000-11-16	辽宁省	大连市	201103	许星	021-24032833	021-24032811	IR@chinagrandauto.com		912102003411090040	报告期内公司无收购及出售资产、吸收合并事项	121.3720199751	31.170871587	121.3527988715	38.9762610214	李建平	乘用车经销及服务。	5500400678	进口汽车品牌销售、汽车及配件销售、二手车销售、汽车维修、汽车保险代理、汽车及配件进出口的项目开发、汽车装饰装潢、汽车租赁及汽车信息咨询等业务	IR@chinagrandauto.com		www.chinagrandauto.com	CNE000001576
105767	600297	广汇汽车	2017-12-31	广汇汽车服务股份公司	零售业	F52	辽宁省大连市甘井子区营升路9号	上海市闵行区虹莘路3998号	1999-07-30	2000-11-16	辽宁省	大连市	201103	许星	021-24032833	021-24032811	IR@chinagrandauto.com	董昊明	912102003411090040	报告期内公司无收购及出售资产、吸收合并事项	121.3720199751	31.170871587	121.3527988715	38.9762610214	李建平	乘用车经销及服务。	8144309682	进口汽车品牌销售、汽车及配件销售、二手车销售、汽车维修、汽车保险代理、汽车及配件进出口的项目开发、汽车装饰装潢、汽车租赁及汽车信息咨询等业务。	IR@chinagrandauto.com		www.chinagrandauto.com	CNE000001576
105767	600297	广汇汽车	2018-12-31	广汇汽车服务股份公司	零售业	F52	辽宁省大连市甘井子区华北路699号	上海市闵行区虹莘路3998号	1999-07-30	2000-11-16	辽宁省	大连市	201103	许星	021-24032833	021-24032811	IR@chinagrandauto.com	董昊明	912102003411090040	重大资产和股权出售:2018年8月,公司全资附属公司西安广汇汽车实业发展有限公司拟向关联方西安广汇汽车产业园投资开发有限公司转让170,908.06平方米的国有土地使用权,转让价格为70,360万元。(相关内容详见公司2018-085号公告)	121.3720199751	31.170871587	121.6050406234	39.0120115861	李建平	乘用车经销及服务。	8217632682	进口汽车品牌销售、汽车及配件销售、二手车销售、汽车维修、汽车保险代理、汽车及配件进出口的项目开发、汽车装饰装潢、汽车租赁及汽车信息咨询等业务	IR@chinagrandauto.com		www.chinagrandauto.com	CNE000001576
105977	600309	万华化学	2015-12-31	万华化学集团股份有限公司	化学原料及化学制品制造业	C26	山东省烟台市幸福南路7号	山东省烟台市幸福南路7号	1998-12-16	2001-01-05	山东省	烟台市	264002	寇光武	0535-6698537	0535-6837894	gwkou@whchem.com	肖明华		报告期内公司无收购及出售资产、吸收合并事项	121.3723597087	37.5631418459	121.3287216192	37.558556125	廖增太	聚氨酯及助剂、异氰酸酯及衍生产品的开发、生产、 销售铁路专线运输、货物装卸、仓储和仓库租赁。	2162334720	聚氨酯及助剂,异氰酸酯(MDI)及衍生产品的开发、生产、销售;技术服务,人员培训;批准范围内的自营进出口业务;许可证范围内铁路专用线经营;热、电、纯水的生产和供应、热力普网建设;开发、制造、销售聚氨酯;销售化工产品;项目投资;技术开发、技术培训等;热塑性聚氨酯弹性体(TPU)、多元醇的研发、生产、销售,化工原料及产品的销售,化工新材料的研究、开发及技术服务;码头和其他港口设施经营等。	stocks@whchem.com		www.whchem.com	CNE0000016J9
105977	600309	万华化学	2016-12-31	万华化学集团股份有限公司	化学原料及化学制品制造业	C26	山东省烟台市经济技术开发区天山路17号	山东省烟台市幸福南路7号	1998-12-16	2001-01-05	山东省	烟台市	264013	寇光武	0535-6698537	0535-6837894	gwkou@whchem.com	肖明华	91370000163044841F	报告期内公司无收购及出售资产、吸收合并事项	121.3723597087	37.5631418459	121.2358703385	37.5592736213	廖增太	聚氨酯及助剂、异氰酸酯及衍生产品的开发、生产、 销售铁路专线运输、货物装卸、仓储和仓库租赁。	2162334720	聚氨酯及助剂,异氰酸酯(MDI)及衍生产品的开发、生产、销售;液化石油气、丙烯、丙烯酸等石化产品的销售;技术服务,人员培训;批准范围内的自营进出口业务;许可证范围内铁路专用线经营;热、电、纯水的生产和供应、热力普网建设;开发、制造、销售聚氨酯;销售化工产品;项目投资;技术开发、技术培训等;热塑性聚氨酯弹性体(TPU)、多元醇的研发、生产、销售,化工原料及产品的销售,化工新材料的研究、开发及技术服务;码头和其他港口设施经营等。	stocks@whchem.com		www.whchem.com	CNE0000016J9
105977	600309	万华化学	2017-12-31	万华化学集团股份有限公司	化学原料及化学制品制造业	C26	山东省烟台市经济技术开发区天山路17号	山东省烟台市幸福南路7号	1998-12-16	2001-01-05	山东省	烟台市	264013	寇光武	0535-6698537	0535-6837894	gwkou@whchem.com	肖明华	91370000163044841F	报告期内公司无收购及出售资产、吸收合并事项	121.3723597087	37.5631418459	121.2358703385	37.5592736213	廖增太	聚氨酯及助剂、异氰酸酯及衍生产品的开发、生产、 销售铁路专线运输、货物装卸、仓储和仓库租赁。	2734012800	聚氨酯及助剂,异氰酸酯(MDI)及衍生产品的开发、生产、销售;液化石油气、丙烯、丙烯酸等石化产品的销售;技术服务,人员培训;批准范围内的自营进出口业务;许可证范围内铁路专用线经营;热、电、纯水的生产和供应、热力普网建设;开发、制造、销售聚氨酯;销售化工产品;项目投资;技术开发、技术培训等;热塑性聚氨酯弹性体(TPU)、多元醇的研发、生产、销售,化工原料及产品的销售,化工新材料的研究、开发及技术服务;码头和其他港口设施经营等。	stocks@whchem.com		www.whchem.com	CNE0000016J9
105977	600309	万华化学	2018-12-31	万华化学集团股份有限公司	化学原料及化学制品制造业	C26	山东省烟台市经济技术开发区天山路17号	山东省烟台市幸福南路7号	1998-12-16	2001-01-05	山东省	烟台市	264013	寇光武	0535-6698537	0535-6837894	gwkou@whchem.com	肖明华	91370000163044841F	报告期内公司无收购及出售资产、吸收合并事项	121.3723597087	37.5631418459	121.2358703385	37.5592736213	廖增太	聚氨酯及助剂、异氰酸酯及衍生产品的开发、生产、 销售铁路专线运输、货物装卸、仓储和仓库租赁。	2734012800	聚氨酯及助剂,异氰酸酯(MDI)及衍生产品的开发、生产、销售;液化石油气、丙烯、丙烯酸等石化产品的销售;技术服务,人员培训;批准范围内的自营进出口业务;许可证范围内铁路专用线经营;热、电、纯水的生产和供应、热力普网建设;开发、制造、销售聚氨酯;销售化工产品;项目投资;技术开发、技术培训等;热塑性聚氨酯弹性体(TPU)、多元醇的研发、生产、销售,化工原料及产品的销售,化工新材料的研究、开发及技术服务;码头和其他港口设施经营等。	stocks@whchem.com		www.whchem.com	CNE0000016J9
105770	600317	营口港	2015-12-31	营口港务股份有限公司	水上运输业	G55	辽宁省营口市鲅鱼圈区营港路1号	辽宁省营口市鲅鱼圈区营港路1号	2000-03-22	2002-01-31	辽宁省	营口市	115007	周志旭	0417-6268506	0417-6268506	zzx@ykport.com.cn	李丽	91210000716409709T	报告期内公司无收购及出售资产、吸收合并事项	122.1377493824	40.2653143725	122.135592978	40.2636880583	李和忠	港口装卸、堆存、运输服务。	6472983003	码头及其他港口设施服务，货物装卸，仓储服务，船舶港口服务，港口设施 设备和港口机械的租赁、维修服务（有效期至2016年4月23日），钢结构工程，机件加工销售， 港口机械、汽车配件、钢材、建材、橡胶制品销售，苫垫及劳保用品制作、销售，尼龙绳生产、 销售，（以下项目限分支机构经营）汽车修理，托辊生产、销售，港口起重运输机械设备制造安 装销售，皮带机、斗轮机、拖车设备制造安装销售，起重设备维修、保养服务，供暖服务，物业 管理。（依法须经批准的项目，经相关部门批准后方可开展经营活动）。	ykplc@ykport.com.cn		www.ykplc.com	CNE0000019S4
103288	600332	白云山	2015-12-31	广州白云山医药集团股份有限公司	医药制造业	C27	广东省广州市沙面北街45号	广东省广州市沙面北街45号	1997-09-01	1997-10-30	广东省	广州市	510130	陈静	020-66281218	020-66281229	chenj@gybys.com.cn	黄雪贞		报告期内公司无收购及出售资产、吸收合并事项	113.2464773327	23.1079298741	113.2465653327	23.1079008741	李楚源	中成药的研究、开发、制造及销售。	1291079250	（1）中西成药、化学原料药、天然药物、生物医药、化学原料药中间体的研究开发、制造与销售；（2）西药、中药和医疗器械的批发、零售和进出口业务；（3）大健康产品的研究开发、生产与销售；及（4）医疗、健康管理、养生养老等健康产业投资等。	sec@gybys.com.cn	00874	www.gybys.com.cn	CNE000001733
103288	600332	白云山	2016-12-31	广州白云山医药集团股份有限公司	医药制造业	C27	广东省广州市荔湾区沙面北街45号	广东省广州市荔湾区沙面北街45号	1997-09-01	1997-10-30	广东省	广州市	510130	陈静	020-66281216	020-66281229	chenj@gybys.com.cn	黄雪贞	9144010163320680X7	本集团收购及出售资产、企业合并及其他交易事项:(一)本报告期内,本集团收购及出售资产、企业合并及其他交易事项1、经本公司第五届第二十三次董事会会议审议会议通过,本公司属下全资子公司王老吉大健康公司拟通过"造血"援建模式,在四川雅安建立王老吉生产基地,项目一期投资总额为人民币2.98亿元,建设两条凉茶灌装生产线。项目按计划已于2015年7月8日完成竣工验收,2016年4月20日顺利完成生产线调试。现已全面量产,工厂目前运营良好。详情请参阅本公司在《上海证券报》、《证券时报》、《中国证券报》、上交所网站及在港交所网站上刊登的日期为2013年7月16日的公告。2、按照"退二进三"的安排,本公司属下11家企业拟进驻广药集团生物医药城白云基地("白云基地")。白云基地占地总规模约2,460亩(其中符合土规面积约2,000亩),白云区政府将提供广药产业城内整体连片的可建设工业用地,分四期供地。首期总…	113.2464773327	23.1079298741	113.2465653327	23.1079008741	李楚源	中成药的研究、开发、制造及销售。	1625790949	(1)中西成药、化学原料药、天然药物、生物医药、化学原料药中间体的研究开发、制造与销售;(2)西药、中药和医疗器械的批发、零售和进出口业务;(3)大健康产品的研究开发、生产与销售;及(4)医疗、健康管理、养生养老等健康产业投资等。	sec@gybys.com.cn	00874	www.gybys.com.cn	CNE000001733
103288	600332	白云山	2017-12-31	广州白云山医药集团股份有限公司	医药制造业	C27	广东省广州市荔湾区沙面北街45号	广东省广州市荔湾区沙面北街45号	1997-09-01	1997-10-30	广东省	广州市	510130	黄雪贞	8620-66281218,66281219	8620-66281229	huangxz@gybys.com.cn;huangrm@gybys.com.cn	黄瑞媚	9144010163320680X7	报告期内公司无收购及出售资产、吸收合并事项	113.2464773327	23.1079298741	113.2465653327	23.1079008741	李楚源	中成药的研究、开发、制造及销售。	1625790949	(1)中西成药、化学原料药、天然药物、生物医药、化学原料药中间体的研究开发、制造与销售;(2)西药、中药和医疗器械的批发、零售和进出口业务;(3)大健康产品的研究开发、生产与销售;及(4)医疗、健康管理、养生养老等健康产业投资等。中成药制造企业主要产品为消渴丸、夏桑菊、乌鸡白凤丸、华佗再造丸、蜜炼川贝枇杷膏、清开灵口服液、小柴胡冲剂等,西药制造企业主要产品为头孢硫脒、阿莫西林等化学制剂药,头孢曲松钠等化学原料药,预包装食品制造企业主要产品为王老吉凉茶等。	sec@gybys.com.cn	00874	www.gybys.com.cn	CNE000001733
103288	600332	白云山	2018-12-31	广州白云山医药集团股份有限公司	医药制造业	C27	广东省广州市荔湾区沙面北街45号	广东省广州市荔湾区沙面北街45号	1997-09-01	1997-10-30	广东省	广州市	510130	黄雪贞	020-66281217,66281219	020-66281229	huangxz@gybys.com.cn		9144010163320680X7	报告期内公司无收购及出售资产、吸收合并事项	113.2465653327	23.1079008741	113.2465653327	23.1079008741	李楚源	中成药的研究、开发、制造及销售。	1625790949	(1)中西成药、化学原料药、天然药物、生物医药、化学原料药中间体的研究开发、制造与销售;(2)西药、中药和医疗器械的批发、零售和进出口业务;(3)大健康产品的研究开发、生产与销售;(4)医疗、健康管理、养生养老等健康产业投资等。	sec@gybys.com.cn	00874	www.gybys.com.cn	CNE000001733
105775	600339	中油工程	2018-12-31	中国石油集团工程股份有限公司	开采辅助活动	B11	新疆维吾尔自治区克拉玛依市独山子区大庆东路2号	北京市朝阳区安定路5号恒毅大厦	1999-04-28	2000-12-25	新疆维吾尔自治区	克拉玛依市	100029	于国锋	010-63596921	010-63596364	yuguofeng@cpec.com.cn	唐涛	91650000712998630A	报告期内公司无收购及出售资产、吸收合并事项	116.406622077	39.980722436	84.8789841739	44.3282462855	白玉光	生产、销售高碱性环烷酸钙、环烷酸镁系列添加剂，高等级道路沥青、建筑沥青、电缆、绝缘和电池封口剂等专用沥青，聚丙烯及塑料。	5583147471	工程总承包服务;工程项目管理服务;工程勘察设计;环境保护监测;技术检测服务;信息系统集成服务;软件开发;机械设备、金属制品、五金产品、化工产品(不含危险化学品)的销售;专业化设计服务;建筑工程机械与设备租赁;货物进出口。(依法须经批准的项目,经相关部门批准后方可开展经营活动)。	tangtao@cpec.com.cn		www.cpec.com.cn	CNE000001642
105776	600340	华夏幸福	2015-12-31	华夏幸福基业股份有限公司	房地产业	K70	河北省廊坊市固安县京开路西侧三号路北侧一号	北京市朝阳区东三环北路霞光里18号佳程广场A座23层	1993-05-28	2003-12-30	河北省	廊坊市	100027	朱洲	010-56982988	010-56982989	IR@cfldcn.com			报告期内公司无收购及出售资产、吸收合并事项	116.4585742228	39.956752532	116.330325817	39.2371485823	王文学	实业投资、企业管理咨询、建筑装饰材料的销售。	2645759430	对房地产、工业园区及基础设施建设投资；房地产中介服务；提供施工设备服务；企业管理咨询；生物医药研发、科技技术推广、服务。	IR@cfldcn.com		www.cfldcn.com	CNE000001GG8
105776	600340	华夏幸福	2016-12-31	华夏幸福基业股份有限公司	房地产业	K70	河北省廊坊市固安县京开路西侧三号路北侧一号	北京市朝阳区东三环北路霞光里18号佳程广场A座7层	1993-05-28	2003-12-30	河北省	廊坊市	100027	林成红	010-56982988	010-56982989	IR@cfldcn.com		911310006096709523	报告期内公司无收购及出售资产、吸收合并事项	116.2985049505	39.4382404733	116.330325817	39.2371485823	王文学	实业投资、企业管理咨询、建筑装饰材料的销售。	2954946709	对房地产、工业园区及基础设施建设投资;房地产中介服务;提供施工设备服务;企业管理咨询;生物医药研发、科技技术推广、服务。	IR@cfldcn.com		www.cfldcn.com	CNE000001GG8
105776	600340	华夏幸福	2017-12-31	华夏幸福基业股份有限公司	房地产业	K70	河北省廊坊市京开路西侧三号路北侧一号	北京市朝阳区东三环北路霞光里18号佳程广场A座7层	1993-05-28	2003-12-30	河北省	廊坊市	100027	林成红	010-56982988	010-56982989	IR@cfldcn.com		911310006096709523	报告期内公司无收购及出售资产、吸收合并事项	116.6856981022	39.5031000448	116.7326493194	39.5957373663	王文学	实业投资、企业管理咨询、建筑装饰材料的销售。	2954946709	对房地产、工业园区及基础设施建设投资;房地产中介服务;提供施工设备服务;企业管理咨询;生物医药研发、科技技术推广、服务。	IR@cfldcn.com		www.cfldcn.com	CNE000001GG8
105776	600340	华夏幸福	2018-12-31	华夏幸福基业股份有限公司	房地产业	K70	河北省廊坊市固安县京开路西侧三号路北侧一号	北京市朝阳区东三环北路霞光里18号佳程广场A座7层	1993-05-28	2003-12-30	河北省	廊坊市	100027	林成红	010-56982988	010-56982989	IR@cfldcn.com		911310006096709523	重大资产和股权出售:华夏幸福基业股份有限公司的全资子公司就部分项目的合作与北京万科企业有限公司、北京恒燚企业管理有限公司签署《合作协议》,各方按照《合作协议》的约定,就合作项目的目标公司股权转让及合作事宜分别签署《股权转让及合作协议》,合作开发位于涿州、大厂、廊坊和霸州的项目,交易价款约为32.34亿元。详见编号为临2018-227《华夏幸福基业股份有限公司关于拟与万科签署合作协议开展项目合作的公告》。	116.4583642228	39.956412532	116.330325817	39.2371485823	王文学	实业投资、企业管理咨询、建筑装饰材料的销售。	3003251709	对房地产、工业园区及基础设施建设投资;房地产中介服务;提供施工设备服务;企业管理咨询;生物医药研发、科技技术推广、服务。	IR@cfldcn.com		www.cfldcn.com	CNE000001GG8
105967	600346	恒力股份	2018-12-31	恒力石化股份有限公司	化学纤维制造业	C28	辽宁省大连市长兴岛临港工业区长松路298号OSBL项目-工务办公楼	辽宁省大连市中山区港兴路6号富力中心41层	1999-03-09	2001-08-20	辽宁省	大连市	116001	李峰	0411-86641378	0411-82224480	lifeng@hengli.com	高明	912102001185762674	报告期内公司无收购及出售资产、吸收合并事项	121.6705929776	38.9276782595	121.4633841776	39.6030574426	范红卫	聚酯纤维相关产品的研发、生产及销售与热电的生产及销售。	5052789925	生产和销售化学纤维(不含化学危险品);货物进出口。(依法须经批准的项目,经相关部门批准后方可开展经营活动)生产和销售化学纤维(不含化学危险品);货物进出口。(依法须经批准的项目,经相关部门批准后方可开展经营活动)	hlzq@hengli.com		hengliinc.com	CNE0000018V0
105871	600352	浙江龙盛	2015-12-31	浙江龙盛集团股份有限公司	化学原料及化学制品制造业	C26	浙江省绍兴市上虞区道墟镇	浙江省绍兴市上虞区道墟镇	1998-03-23	2003-08-01	浙江省	绍兴市	312368	姚建芳	0575-82048616	0575-82041589	yaojf@lonsen.com	陈国江	91330000704202137E	重大资产和股权出售: 1、2015年1月28日至3月6日期间，公司控股子公司宝利佳有限公司通过大宗交易将所持的山东国瓷功 能材料股份有限公司1,872万股股份全部出售。详见公司在《上海证券报》、《证券时报》和《证券日报》上刊 登的《关于出售山东国瓷功能材料股份有限公司股份的公告》（公告编号：2015-029号）。 2、2015年8月18日，公司控股子公司上海崇力实业股份有限公司与金兴汽车内饰件股份有限公司签署《股 权转让协议书》，将其持有的天津金兴汽车内饰有限公司60%股权以4,450万元转让给金兴汽车内饰件股份有限 公司，并于同日办妥工商变更登记手续。	120.7715603835	30.0443577736	120.7715123835	30.0443137736	阮伟祥	从事染料、助剂、中间体的生产和销售。	3253331860	染料及助剂、化工产品的技术开发、技术转让、技术咨询服务、 生产、销售（化学危险品凭许可证经营）；上述产品的原辅材料、机械设备、仪器仪表及零配件、包装制品的销 售。本企业自产的各类染料、助剂、化工中间体的出口；本企业生产、科研所需的原辅材料、机械设备、仪器仪 表、零配件的进口，实业投资，资产管理。主要产品：染料、中间体、助剂、减水剂、无机化学品、房地产。	mail@longsheng.com		www.longsheng.com	CNE000001FJ4
105871	600352	浙江龙盛	2016-12-31	浙江龙盛集团股份有限公司	化学原料及化学制品制造业	C26	浙江省绍兴市上虞区道墟镇	浙江省绍兴市上虞区道墟镇	1998-03-23	2003-08-01	浙江省	绍兴市	312368	姚建芳	0575-82048616	0575-82041589	yaojf@lonsen.com	陈国江	91330000704202137E	重大资产和股权出售:1、2016年5月21日公司与绍兴市上虞杭州湾建设开发集团有限公司签署《滨海·龙盛大厦房屋转让协议书》,将位于杭州湾上虞经济技术开发区(上虞滨海新城),主楼12层、地下1层,裙楼3层,综合服务楼4层,土地用途为商务金融,使用权面积23,214.76平方米,建设用地使用权终止日期2053年10月27日,房产证登记建筑面积29,801.79平方米的滨海·龙盛大厦以191,835,020.79元转让给绍兴市上虞杭州湾建设开发集团有限公司。2、公司于2014年4月3日与汇添富资本管理有限公司、汇添富资本-赢富1号专项资产管理计划签署《专项资产管理计划份额转登记合同》,公司以149,807,536.68元的价格受让汇添富资本-汇盛聚智3号-绿地股权投资专项管理计划15,000万份,该专项管理计划通过宁波汇盛聚智投资合伙企业(有限公司)间接投资绿地控股集团有限公司的股权,宁波汇盛…	120.7715603835	30.0443577736	120.7715123835	30.0443137736	阮伟祥	从事染料、助剂、中间体的生产和销售。	3253331860	染料及助剂、化工产品的技术开发、技术转让、技术咨询服务、生产、销售(化学危险品凭许可证经营);上述产品的原辅材料、机械设备、仪器仪表及零配件、包装制品的销售。本企业自产的各类染料、助剂、化工中间体的出口;本企业生产、科研所需的原辅材料、机械设备、仪器仪表、零配件的进口,实业投资,资产管理。主要产品:染料、中间体、助剂、减水剂、无机化学品、房地产。	mail@longsheng.com		www.longsheng.com	CNE000001FJ4
105871	600352	浙江龙盛	2017-12-31	浙江龙盛集团股份有限公司	化学原料及化学制品制造业	C26	浙江省绍兴市杭州湾上虞经济技术开发区东一区至远路2号	浙江省绍兴市上虞区道墟镇	1998-03-23	2003-08-01	浙江省	绍兴市	312368	姚建芳	0575-82048616	0575-82041589	yaojf@lonsen.com	陈国江	91330000704202137E	重大资产和股权出售:2017年1月12日,公司与中企发展投资(北京)有限公司签订《股权转让协议》,将所持有的锦州银行股份有限公司1亿股股份(占目前总股本的1.47%)转让给中企发展投资(北京)有限公司,转让价格人民币5.9亿元。2017年8月7日,公司收到中国证券登记结算有限责任公司出具的《过户登记确认书》,本次股份转让已于2017年7月31日完成过户手续,具体内容详见2017年1月14日披露的《关于出售资产的公告》(公告编号:2017-001号)、2017年8月8日披露的《关于出售资产进展的公告》(公告编号:2017-035号)。	120.7715603835	30.0443577736	120.8532301975	30.1803255599	阮伟祥	从事染料、助剂、中间体的生产和销售。	3253331860	化工产品的研发、生产、销售;汽车配件的生产、销售;房地产开发。产品主要有:染料、中间体、助剂、减水剂、无机化学品、汽车配件和房地产。	mail@longsheng.com		www.longsheng.com	CNE000001FJ4
105871	600352	浙江龙盛	2018-12-31	浙江龙盛集团股份有限公司	化学原料及化学制品制造业	C26	浙江省绍兴市杭州湾上虞经济技术开发区东一区至远路2号	浙江省绍兴市上虞区道墟镇	1998-03-23	2003-08-01	浙江省	绍兴市	312368	姚建芳	0575-82048616	0575-82041589	yaojf@lonsen.com	陈国江	91330000704202137E	报告期内公司无收购及出售资产、吸收合并事项	120.7715603835	30.0443577736	120.8532301975	30.1803255599	阮伟祥	从事染料、助剂、中间体的生产和销售。	3253331860	化工产品的研发、生产、销售;汽车配件的生产、销售;房地产开发。产品主要有:染料、中间体、助剂、减水剂、无机化学品、汽车配件和房地产。	mail@longsheng.com		www.longsheng.com	CNE000001FJ4
102700	600362	江西铜业	2015-12-31	江西铜业股份有限公司	有色金属冶炼及压延加工业	C32	江西省贵溪市冶金大道15号	江西省南昌市昌东大道7666号	1997-01-24	1997-06-12	江西省	贵溪市	330096	黄东风	0791-82710117	0791-82710114	jccl@jxcc.com	肖华东		报告期内公司无收购及出售资产、吸收合并事项	115.9959992988	28.6966400557	117.243833709	28.3123888231	龙子平	有色金属矿、稀贵金属、非金属矿。	3462729405	有色金属矿、稀贵金属、非金属矿；有色金属及相关副产品的冶炼、压延 加工与深加工；自产产品的售后服务、相关的咨询服务和业务；境外期货套期保值业务；与上述 业务相关的三氧化二砷、硫酸、氧气、液氧、液氮、液氩的生产和加工。	jccl@jxcc.com	00358	www.jxcc.com	CNE0000019P0
102700	600362	江西铜业	2016-12-31	江西铜业股份有限公司	有色金属冶炼及压延加工业	C32	江西省贵溪市冶金大道15号	江西省南昌市高新开发区昌东大道7666号	1997-01-24	1997-06-12	江西省	贵溪市	330096	李保民(代)	0791-82710117	0791-82710114	jccl@jxcc.com	肖华东	91360000625912173B	报告期内公司无收购及出售资产、吸收合并事项	115.9935956923	28.7014069225	117.243833709	28.3123888231	李保民	有色金属矿、稀贵金属、非金属矿。	3462729405	有色金属矿、稀贵金属、非金属矿;有色金属及相关副产品的冶炼、压延加工与深加工;自产产品的售后服务、相关的咨询服务和业务;境外期货套期保值业务;与上述业务相关的三氧化二砷、硫酸、氧气、液氧、液氮、液氩的生产和加工。	jccl@jxcc.com	00358	www.jxcc.com	CNE0000019P0
102700	600362	江西铜业	2017-12-31	江西铜业股份有限公司	有色金属冶炼及压延加工业	C32	江西省贵溪市冶金大道15号	江西省南昌市高新开发区昌东大道7666号	1997-01-24	1997-06-12	江西省	贵溪市	330096	龙子平(代)	0791-82710117	0791-82710114	jccl@jxcc.com	肖华东	91360000625912173B	报告期内公司无收购及出售资产、吸收合并事项	115.9935956923	28.7014069225	117.243833709	28.3123888231	龙子平	有色金属矿、稀贵金属、非金属矿。	3462729405	有色金属矿、稀贵金属、非金属矿;有色金属及相关副产品的冶炼、压延加工与深加工;自产产品的售后服务、相关的咨询服务和业务;境外期货套期保值业务;与上述业务相关的三氧化二砷、硫酸、氧气、液氧、液氮、液氩的生产和加工。	jccl@jxcc.com	00358	www.jxcc.com	CNE0000019P0
102700	600362	江西铜业	2018-12-31	江西铜业股份有限公司	有色金属冶炼及压延加工业	C32	江西省贵溪市冶金大道15号	江西省南昌市高新开发区昌东大道7666号	1997-01-24	1997-06-12	江西省	贵溪市	330096	龙子平(代)	0791-82710117	0791-82710114	jccl@jxcc.com	陆高明	91360000625912173B	报告期内公司无收购及出售资产、吸收合并事项	115.9935956923	28.7014069225	117.243833709	28.3123888231	龙子平	有色金属矿、稀贵金属、非金属矿。	3462729405	有色金属矿、稀贵金属、非金属矿;有色金属及相关副产品的冶炼、压延加工与深加工;自产产品的售后服务、相关的咨询服务和业务;境外期货套期保值业务;与上述业务相关的三氧化二砷、硫酸、氧气、液氧、液氮、液氩的生产和加工。	jccl@jxcc.com	00358	www.jxcc.com	CNE0000019P0
105188	600369	西南证券	2015-12-31	西南证券股份有限公司	资本市场服务	J67	重庆市江北区桥北苑8号	重庆市江北区桥北苑8号西南证券大厦	1993-12-30	2001-01-09	重庆市	重庆市	400023	徐鸣镝	023-63786433	023-63786477	xmd@swsc.com.cn	王致贤		报告期内公司无收购及出售资产、吸收合并事项	106.5655960484	29.5816666858	106.5649840484	29.5812116858	王珠林	证券（含境内上市外资股）的代理买卖等。	5645109124	证券经纪,证券投资咨询,与证券交易、证券投资活动有关的财务顾问,证券承销与保荐,证券自营,证券资产管理,融资融券,证券投资基金代销,代销金融产品,为期货公司提供中间介绍业务,股票期权做市。	dshb@swsc.com.cn		www.swsc.com.cn	CNE0000016P6
105188	600369	西南证券	2016-12-31	西南证券股份有限公司	资本市场服务	J67	重庆市江北区桥北苑8号	重庆市江北区桥北苑8号,西南证券大厦	1993-12-30	2001-01-09	重庆市	重庆市	400023	徐鸣镝	023-63786433	023-63786477	xmd@swsc.com.cn	王致贤	91500000203291872B	重大资产和股权出售:报告期内,子公司重庆股份转让中心有限责任公司出售重庆金融资产交易所股权,实现投资收益6,716.46万元。	106.5679250484	29.5810066858	106.5649840484	29.5812116858	吴坚	证券（含境内上市外资股）的代理买卖等。	5645109124	证券经纪,证券投资咨询,与证券交易、证券投资活动有关的财务顾问,证券承销与保荐,证券自营,证券资产管理,融资融券,证券投资基金代销,代销金融产品,为期货公司提供中间介绍业务,股票期权做市。	dshb@swsc.com.cn		www.swsc.com.cn	CNE0000016P6
105188	600369	西南证券	2017-12-31	西南证券股份有限公司	资本市场服务	J67	重庆市江北区桥北苑8号	重庆市江北区桥北苑8号;重庆市西南证券大厦	1993-12-30	2001-01-09	重庆市	重庆市	400023	吴坚	023-63786433	023-63786477	wujian@swsc.com.cn	刘瑞	91500000203291872B	报告期内公司无收购及出售资产、吸收合并事项	106.5679250484	29.5810066858	106.5649840484	29.5812116858	吴坚	证券（含境内上市外资股）的代理买卖等。	5645109124	证券经纪,证券投资咨询,与证券交易、证券投资活动有关的财务顾问,证券承销与保荐,证券自营,证券资产管理,融资融券,证券投资基金代销,代销金融产品,为期货公司提供中间介绍业务,股票期权做市。	dshb@swsc.com.cn		www.swsc.com.cn	CNE0000016P6
105188	600369	西南证券	2018-12-31	西南证券股份有限公司	资本市场服务	J67	重庆市江北区桥北苑8号	重庆市江北区桥北苑8号,西南证券大厦	1993-12-30	2001-01-09	重庆市	重庆市	400023	廖庆轩(代)	023-63786433	023-63786001	lqx@swsc.com.cn	刘瑞	91500000203291872B	重大资产和股权出售:1.2018年12月,公司处置持有的重庆股份转让中心19%股权,处置价款61,940,000.00元,处置后公司持有重庆股份转让中心34%股权。2.2018年2月,公司处置持有的重庆西证渝富股权投资基金管理有限公司全部股权,处置价款69,504,695.00元,处置后公司不再持有重庆西证渝富股权投资基金管理有限公司股权。	106.5649840484	29.5812116858	106.5649840484	29.5812116858	廖庆轩	证券（含境内上市外资股）的代理买卖等。	5645109124	证券经纪,证券投资咨询,与证券交易、证券投资活动有关的财务顾问,证券承销与保荐,证券自营,证券资产管理,融资融券,证券投资基金代销,代销金融产品,为期货公司提供中间介绍业务,股票期权做市。	dshb@swsc.com.cn		www.swsc.com.cn	CNE0000016P6
105780	600372	中航电子	2015-12-31	中航航空电子系统股份有限公司	铁路、船舶、航空航天和其它运输设备制造业	C37	北京市经济技术开发区经海二路29号院8号楼	北京市朝阳区曙光西里甲5号院20号楼第八、九层	1999-11-26	2001-07-06	北京市	北京市	100028	孙洪伟	010-58355270	010-58355275	sunhw77@sina.com	蔡昌滨		报告期内公司无收购及出售资产、吸收合并事项	116.4555542228	39.962172532	116.5315290508	39.8042509573	张昆辉	航空照明系统等照明系统制造业务。	1759162938	航空电子系统产品的研发、生产及销售。主要产品包括航空、航天、舰船、兵器等领域的机械电子、航空电子、自动控制、仪器仪表、惯性导航、电子信息、雷达与火控系统及基础元器件等。	hondianzq@avic.com			CNE0000018C0
105780	600372	中航电子	2016-12-31	中航航空电子系统股份有限公司	铁路、船舶、航空航天和其它运输设备制造业	C37	北京市经济技术开发区经海二路29号院8号楼	北京市朝阳区曙光西里甲5号院20号楼第八、九层	1999-11-26	2001-07-06	北京市	北京市	100028	戚侠	010-58355270	010-58355275	qix@vip.163.com	刘婷婷	91110000705514765U	报告期内公司无收购及出售资产、吸收合并事项	116.4555542228	39.962172532	116.5315290508	39.8042509573	卢广山	航空照明系统等照明系统制造业务。	1759162938	航空电子系统产品的研发、生产及销售。主要产品包括航空、航天、舰船、兵器等领域的机械电子、航空电子、自动控制、仪器仪表、惯性导航、电子信息、雷达与火控系统及基础元器件等。	hondianzq@avic.com		www.aviconics.com.cn	CNE0000018C0
105780	600372	中航电子	2017-12-31	中航航空电子系统股份有限公司	铁路、船舶、航空航天和其它运输设备制造业	C37	北京市经济技术开发区经海二路29号院8号楼	北京市朝阳区曙光西里甲5号院20号楼第八、九层	1999-11-26	2001-07-06	北京市	北京市	100028	戚侠	010-58355270	010-58355275	qix@vip.163.com	刘婷婷	91110000705514765U	报告期内公司无收购及出售资产、吸收合并事项	116.4555542228	39.962172532	116.5315290508	39.8042509573	张昆辉	航空照明系统等照明系统制造业务。	1759162938	航空电子产品的研发、生产和销售,主要产品包括航空、航天、舰船、兵器等领域的机械电子、航空电子、自动控制、仪器仪表、惯性导航、电子信息、雷达与火控系统及基础元器件等。	hondianzq@avic.com		www.aviconics.com.cn	CNE0000018C0
105780	600372	中航电子	2018-12-31	中航航空电子系统股份有限公司	铁路、船舶、航空航天和其它运输设备制造业	C37	北京市经济技术开发区经海二路29号院8号楼	北京市朝阳区曙光西里甲5号院20号楼	1999-11-26	2001-07-06	北京市	北京市	100028	张力	010-58355270	010-58354844	xifeizhang@sina.com	刘婷婷	91110000705514765U	重大资产和股权出售:中航电子控股子公司成都凯天电子股份有限公司将其持有的赛维航电科技有限公司26.77%股权,通过协议转让方式转让给中航机载系统有限公司,取得投资收益1.19亿元。	116.4557282228	39.962323532	116.5315290508	39.8042509573	张昆辉	航空照明系统等照明系统制造业务。	1759162938	航空电子产品的研发、生产和销售,主要产品包括航空、航天、舰船、兵器等领域的机械电子、航空电子、自动控制、仪器仪表、惯性导航、电子信息、雷达与火控系统及基础元器件等。	hondianzq@avic.com		www.aviconics.com.cn	CNE0000018C0
105781	600373	中文传媒	2015-12-31	中文天地出版传媒股份有限公司	新闻和出版业	R85	江西省上饶市南环路2号	江西省南昌市红谷滩新区学府大道299号	1998-11-30	2002-03-04	江西省	上饶市	330038	吴涤	0791-85896008	0791-85896008	zwcm@600373.com.cn	赵卫红	91361100705758356U	报告期内公司无收购及出售资产、吸收合并事项	115.8454354458	28.6593364357	117.9848529509	28.4231866255	赵东亮	国内版图书、电子、期刊批发；文化艺术品经营。	1377940025	国内版图书、电子、期刊批发兼零售（许可证有效期至2019年06月30日）；文化艺术品经 营；各类广告的制作、发布、代理；会议及展览服务；国内外贸易；资产管理与投资；房地产开 发与销售；以下项目限分支机构经营：图书、报刊、音像、电子出版物的出版；影视制作与发行； 互联网文化产品的制作、经营及其服务；出版物零售；文化经纪；仓储、物流与配送服务。（依 法须经批准的项目，经相关部门审批后方可开展经营活动）	zwcm@600373.com.cn		www.600373.com.cn	CNE0000019X4
105781	600373	中文传媒	2016-12-31	中文天地出版传媒股份有限公司	新闻和出版业	R85	江西省上饶市南环路2号	江西省南昌市红谷滩新区学府大道299号	1998-11-30	2002-03-04	江西省	上饶市	330038	吴涤	0791-85896008	0791-85896008	zwcm@600373.com.cn	赵卫红	91361100705758356U	重大资产和股权出售:交易对方:嘉诚中泰文化艺术投资管理有限公司;被出售资产:北京艺融民生艺术投资管理有限公司40%的股权;出售日:2016年10月;出售价格(万元):21,019;出售产生的损益(万元):-245.76;是否为关联交易(如是,说明定价原则):否;资产出售定价原则:市场评估值;所涉及的资产产权是否已全部过户:是;资产出售为上市公司贡献的净利润占利润总额的比例(%):-0.18%	115.8454354458	28.6593364357	117.9848529509	28.4231866255	赵东亮	国内版图书、电子、期刊批发；文化艺术品经营。	1377940025	国内版图书、电子、期刊批发兼零售(许可证有效期至2019年06月30日);文化艺术品经营;各类广告的制作、发布、代理;会议及展览服务;国内外贸易;资产管理与投资;房地产开发与销售;以下项目限分支机构经营:图书、报刊、音像、电子出版物的出版;影视制作与发行;互联网文化产品的制作、经营及其服务;出版物零售;文化经纪;仓储、物流与配送服务。(依法须经批准的项目,经相关部门审批后方可开展经营活动)	zwcm@600373.com.cn		www.600373.com.cn	CNE0000019X4
105781	600373	中文传媒	2017-12-31	中文天地出版传媒股份有限公司	新闻和出版业	R85	江西省上饶市南环路2号	江西省南昌市红谷滩新区学府大道299号	1998-11-30	2002-03-04	江西省	上饶市	330038	吴涤	0791-85896008	0791-85896008	zwcm@600373.com.cn	赵卫红	91361100705758356U	报告期内公司无收购及出售资产、吸收合并事项	115.8454354458	28.6593364357	117.9848529509	28.4231866255	赵东亮	国内版图书、电子、期刊批发；文化艺术品经营。	1377940025	国内版图书、电子、期刊批发兼零售(许可证有效期至2019年06月30日);文化艺术品经营;各类广告的制作、发布、代理;会议及展览服务;国内外贸易;资产管理与投资;房地产开发与销售;以下项目限分支机构经营:图书、报刊、音像、电子出版物的出版;影视制作与发行;互联网文化产品的制作、经营及其服务;出版物零售;文化经纪;仓储、物流与配送服务。(依法须经批准的项目,经相关部门审批后方可开展经营活动)	zwcm@600373.com.cn		www.600373.com.cn	CNE0000019X4
105873	600376	首开股份	2016-12-31	北京首都开发股份有限公司	房地产业	K70	北京市东城区安定门外大街183号京宝花园二层	北京市西城区复兴门内大街156号招商国际金融中心D座	1993-12-29	2001-03-12	北京市	北京市	100031	王怡	010-66428156	010-66428061	bcdc@bcdh.com.cn	钟宁	91110000101309074C	报告期内公司无收购及出售资产、吸收合并事项	116.3620419407	39.9063224197	116.4070595326	39.9533062007	潘利群	房地产的开发与经营，具体为商品住宅小区的开发建设，包括商品房、经济适用房、普通办公楼、商业设施以及土地等的开发与销售。	2579565242	房地产开发、商品房销售;房屋租赁;建筑工程咨询;室内外装饰装璜;技术开发、技术服务;销售自行开发的产品;购销建筑材料、化工轻工材料、工艺美术品、家具、机械电器设备(汽车除外)、五金交电、纺织品、百货、计算机软硬件、日用杂品;经贸信息咨询;劳务服务。	bcdc@bcdh.com.cn		www.shoukaigufen.com	CNE000001782
105873	600376	首开股份	2017-12-31	北京首都开发股份有限公司	房地产业	K70	北京市东城区安定门外大街183号京宝花园二层	北京市西城区复兴门内大街156号招商国际金融中心D座	1993-12-29	2001-03-12	北京市	北京市	100031	王怡	010-66428156	010-66428061	bcdc@bcdh.com.cn	钟宁	91110000101309074C	重大资产和股权出售:公司全资子公司城开集团所持深圳祈年100%股权于2017年5月18日经北京产权交易所公开挂牌。挂牌期满,产生了多家意向受让方,最终通过网络竞价(多次报价)方式由深圳市万科房地产有限公司以总价117,342.70万元竞得;子公司名称:深圳祈年;股权处置价款(万元):117,342.70;股权处置比例%:100;股权处置方式:转让;丧失控制权的时点:2017年7月;丧失控制权时点的确定依据:股权转移;处置价款与处置投资对应的合并财务报表层面享有该子公司净资产份额的差额(万元):94,124.30	116.3620419407	39.9063224197	116.4070595326	39.9533062007	潘利群	房地产的开发与经营，具体为商品住宅小区的开发建设，包括商品房、经济适用房、普通办公楼、商业设施以及土地等的开发与销售。	2579565242	为房地产开发及持有物业经营。	bcdc@bcdh.com.cn		www.shoukaigufen.com	CNE000001782
105921	600383	金地集团	2015-12-31	金地(集团)股份有限公司	房地产业	K70	广东省深圳市福田区福强路金地商业大楼	广东省深圳市福田区福强路金地商业大楼	1996-02-08	2001-04-12	广东省	深圳市	518048	徐家俊	0755-82039509	0755-82039900	ir@gemdale.com	张晓瑜		报告期内公司无收购及出售资产、吸收合并事项	114.0390021818	22.5217411446	114.0376051818	22.5226291446	凌克	房地产的开发、经营与销售。	4500849372	房地产开发经营、自有物业管理、兴办各类实体以及信息咨询服务。	ir@gemdale.com		www.gemdale.com	CNE000001790
105921	600383	金地集团	2016-12-31	金地(集团)股份有限公司	房地产业	K70	广东省深圳市福田区福强路金地商业大楼	广东省深圳市福田区福强路金地商业大楼	1996-02-08	2001-04-12	广东省	深圳市	518048	徐家俊	0755-82039509	0755-82039900	ir@gemdale.com	张晓瑜	914403001921816342	报告期内公司无收购及出售资产、吸收合并事项	114.0390021818	22.5217411446	114.0376051818	22.5226291446	凌克	房地产的开发、经营与销售。	4513631772	房地产开发经营、自有物业管理、兴办各类实体以及信息咨询服务。	ir@gemdale.com		www.gemdale.com	CNE000001790
105921	600383	金地集团	2017-12-31	金地(集团)股份有限公司	房地产业	K70	广东省深圳市福田区福强路金地商业大楼	广东省深圳市福田区福强路金地商业大楼	1996-02-08	2001-04-12	广东省	深圳市	518048	徐家俊	0755-82039509	0755-82039900	ir@gemdale.com	张晓瑜	914403001921816342	报告期内公司无收购及出售资产、吸收合并事项	114.0390021818	22.5217411446	114.0376051818	22.5226291446	凌克	房地产的开发、经营与销售。	4514583572	房地产开发经营、自有物业管理、兴办各类实体以及信息咨询服务。	ir@gemdale.com		www.gemdale.com	CNE000001790
105921	600383	金地集团	2018-12-31	金地(集团)股份有限公司	房地产业	K70	广东省深圳市福田区福强路金地商业大楼	广东省深圳市福田区福强路金地商业大楼	1996-02-08	2001-04-12	广东省	深圳市	518048	徐家俊	0755-82039509	0755-82039900	ir@gemdale.com	张晓瑜	914403001921816342	报告期内公司无收购及出售资产、吸收合并事项	114.0390021818	22.5217411446	114.0376051818	22.5226291446	凌克	房地产的开发、经营与销售。	4514583572	房地产开发经营、自有物业管理、兴办各类实体以及信息咨询服务。	ir@gemdale.com		www.gemdale.com	CNE000001790
105735	600390	五矿资本	2017-12-31	五矿资本股份有限公司	其他金融业	J69	湖南省长沙市高新技术开发区麓枫路69号	北京市海淀区三里河路5号;湖南省长沙市岳麓区麓山南路966号	1999-08-31	2001-01-15	湖南省	长沙市	100044,410012	李淼	0731-88657382	0731-88827884	limiao@minmetals.com		91430000712194499R	重大资产和股权出售:1、转让松桃金瑞矿业开发有限公司55%股权松桃金瑞矿业开发有限公司主要经营锰矿开采、加工、购销,锰产品系列加工及贸易。由于下游钢铁行业需求持续低迷,电解锰行业产能过剩严重,电解锰市场价格断崖式下跌,金瑞矿业2015年开始出现亏损,并自2016年1月起停产。为进一步聚焦金融主业,优化公司资产结构及业务结构,报告期内公司通过公开挂牌方式将所持有的金瑞矿业55%股权以945.056007万元的价格转让给自然人严长江。本次金瑞矿业55%股权转让有利于公司盘活部分长期低效资产,有效降低公司经营风险、环保风险和投资风险。2、对外出售非金融资产为进一步聚焦金融主业,提升运营效率,优化公司治理结构,推动转型升级和长远发展,报告期内公司分别按40%、40%、20%的比例向五矿股份、长沙矿冶院、创合投资转让公司分别持有的长远锂科100%股权、金驰材料100%股权,同时公司还向长沙矿冶院转…	112.897364909	28.2234876627	112.8916075778	28.2227606366	任珠峰	电子基础材料、金属材料、超硬材料及其制品、专用设备的技术开发、生产和销售；公司主导产品为电子基础材料四氧化三锰、合成金刚。	3748387882	证券、期货、信托等金融业务与实业(财务性)股权投资业务;金属材料及制品、超硬材料及制品、电子材料及制品、电源材料及制品的生产、销售;矿产品的开采(限分支机构凭本企业许可证经营)、生产、加工、销售。	minfinance@minmetals.com,minfinance@minfinance.com.cn		www.minfinance.com.cn	CNE0000016N1
[truncated: 4,272 more rows]
