# Supplementary material
Source: Research Square preprint supplement (doi:10.21203/rs.3.rs-9809611/v1)
Supplement: Supplementary file 5 [file 964e1aea44ab9958e15f54e7.xlsx]

## Sheet: Sheet1
证券代码	证券简称	年份	季度	ESG表现	ESG综合评级	ESG综合得分	E评级	E得分	S评级	S得分	G评级	G得分	行业代码	行业名称	所属省份	所属省份代码	所属城市	所属城市代码
000001	深发展A	2009	1	6	BBB	82.56	B	72.98	BBB	80.26	A	88.73	J66	货币金融服务	广东省	440000	深圳市	440300
000001	深发展A	2009	2	6	BBB	82.26	CCC	69.87	BB	77.46	AA	91.51	J66	货币金融服务	广东省	440000	深圳市	440300
000001	深发展A	2009	3	6	BBB	82.81	CCC	69.87	BB	77.46	AA	92.7	J66	货币金融服务	广东省	440000	深圳市	440300
000001	深发展A	2009	4	6	BBB	82.38	CCC	69.87	BB	77.46	AA	91.77	J66	货币金融服务	广东省	440000	深圳市	440300
000001	深发展A	2010	1	6	BBB	82.81	CCC	69.87	BB	77.46	AA	92.7	J66	货币金融服务	广东省	440000	深圳市	440300
000001	深发展A	2010	2	6	BBB	81.19	CCC	69.87	BB	75.07	AA	90.84	J66	货币金融服务	广东省	440000	深圳市	440300
000001	深发展A	2010	3	6	BBB	81.49	CCC	69.87	BB	75.07	AA	91.51	J66	货币金融服务	广东省	440000	深圳市	440300
000001	深发展A	2010	4	6	BBB	81.49	CCC	69.87	BB	75.07	AA	91.51	J66	货币金融服务	广东省	440000	深圳市	440300
000001	深发展A	2011	1	6	BBB	82.52	CCC	69.87	BB	77.89	AA	91.77	J66	货币金融服务	广东省	440000	深圳市	440300
000001	深发展A	2011	2	6	BBB	80.35	CC	60.53	BB	77.54	AA	91.77	J66	货币金融服务	广东省	440000	深圳市	440300
000001	深发展A	2011	3	6	BBB	80.71	CC	60.53	BB	77.54	AA	92.55	J66	货币金融服务	广东省	440000	深圳市	440300
000001	深发展A	2011	4	6	BBB	80.71	CC	60.53	BB	77.54	AA	92.55	J66	货币金融服务	广东省	440000	深圳市	440300
000001	平安银行	2012	1	6	BBB	80.71	CC	60.53	BB	77.54	AA	92.55	J66	货币金融服务	广东省	440000	深圳市	440300
000001	平安银行	2012	2	6	BBB	84.45	B	72.98	BBB	82.01	AA	91.62	J66	货币金融服务	广东省	440000	深圳市	440300
000001	平安银行	2012	3	6	BBB	84.88	B	72.98	BBB	82.01	AA	92.55	J66	货币金融服务	广东省	440000	深圳市	440300
000001	平安银行	2012	4	6	BBB	84.76	B	72.98	BBB	82.01	AA	92.29	J66	货币金融服务	广东省	440000	深圳市	440300
000001	平安银行	2013	1	6	BBB	84.88	B	72.98	BBB	82.01	AA	92.55	J66	货币金融服务	广东省	440000	深圳市	440300
000001	平安银行	2013	2	6	BBB	84.65	BB	76.2	BBB	84.44	A	88.84	J66	货币金融服务	广东省	440000	深圳市	440300
000001	平安银行	2013	3	7	A	85.16	BB	76.2	BBB	82.01	AA	91.62	J66	货币金融服务	广东省	440000	深圳市	440300
000001	平安银行	2013	4	7	A	85.16	BB	76.2	BBB	82.01	AA	91.62	J66	货币金融服务	广东省	440000	深圳市	440300
000001	平安银行	2014	1	7	A	85.04	BB	76.2	BBB	82.01	AA	91.36	J66	货币金融服务	广东省	440000	深圳市	440300
000001	平安银行	2014	2	6	BBB	83.28	B	72.98	A	86.17	A	86.18	J66	货币金融服务	广东省	440000	深圳市	440300
000001	平安银行	2014	3	6	BBB	83.97	B	72.98	BBB	83.75	A	89.37	J66	货币金融服务	广东省	440000	深圳市	440300
000001	平安银行	2014	4	6	BBB	84.45	B	72.98	BBB	83.75	AA	90.41	J66	货币金融服务	广东省	440000	深圳市	440300
000001	平安银行	2015	1	6	BBB	84.57	B	72.98	BBB	83.75	AA	90.67	J66	货币金融服务	广东省	440000	深圳市	440300
000001	平安银行	2015	2	6	BBB	83.25	B	72.98	BBB	82.57	A	88.62	J66	货币金融服务	广东省	440000	深圳市	440300
000001	平安银行	2015	3	6	BBB	83.75	B	72.98	BBB	80.15	AA	91.4	J66	货币金融服务	广东省	440000	深圳市	440300
000001	平安银行	2015	4	6	BBB	83.63	B	72.98	BBB	80.15	AA	91.14	J66	货币金融服务	广东省	440000	深圳市	440300
000001	平安银行	2016	1	6	BBB	83.63	B	72.98	BBB	80.15	AA	91.14	J66	货币金融服务	广东省	440000	深圳市	440300
000001	平安银行	2016	2	6	BBB	84.42	BB	79.41	BBB	81.66	A	88.73	J66	货币金融服务	广东省	440000	深圳市	440300
000001	平安银行	2016	3	7	A	85.35	BB	79.41	BB	79.23	AA	92.44	J66	货币金融服务	广东省	440000	深圳市	440300
000001	平安银行	2016	4	6	BBB	84.73	BB	79.41	BB	79.23	AA	91.1	J66	货币金融服务	广东省	440000	深圳市	440300
000001	平安银行	2017	1	6	BBB	84.8	BB	79.41	BB	76.42	AA	93.22	J66	货币金融服务	广东省	440000	深圳市	440300
000001	平安银行	2017	2	6	BBB	82.24	BBB	80.52	B	74.32	A	88.58	J66	货币金融服务	广东省	440000	深圳市	440300
000001	平安银行	2017	3	6	BBB	82.12	BBB	80.52	B	74.32	A	88.32	J66	货币金融服务	广东省	440000	深圳市	440300
000001	平安银行	2017	4	6	BBB	81.69	BBB	80.52	B	74.32	A	87.39	J66	货币金融服务	广东省	440000	深圳市	440300
000001	平安银行	2018	1	6	BBB	82.12	BBB	80.52	B	74.32	A	88.32	J66	货币金融服务	广东省	440000	深圳市	440300
000001	平安银行	2018	2	5	BB	78.49	BB	77.31	CCC	67.27	A	86.87	J66	货币金融服务	广东省	440000	深圳市	440300
000001	平安银行	2018	3	5	BB	78.49	BB	77.31	CCC	67.27	A	86.87	J66	货币金融服务	广东省	440000	深圳市	440300
000001	平安银行	2018	4	5	BB	77.59	BB	77.31	CCC	67.27	BBB	84.91	J66	货币金融服务	广东省	440000	深圳市	440300
000001	平安银行	2019	1	5	BB	76.45	BB	77.31	CCC	67.27	BBB	82.44	J66	货币金融服务	广东省	440000	深圳市	440300
000001	平安银行	2019	2	5	BB	79.94	BB	77.31	BB	78.17	BBB	82.44	J66	货币金融服务	广东省	440000	深圳市	440300
000001	平安银行	2019	3	6	BBB	82.22	BB	77.31	BB	78.17	A	87.39	J66	货币金融服务	广东省	440000	深圳市	440300
000001	平安银行	2019	4	6	BBB	82.22	BB	77.31	BB	78.17	A	87.39	J66	货币金融服务	广东省	440000	深圳市	440300
000001	平安银行	2020	1	6	BBB	82.65	BB	77.31	BB	78.17	A	88.32	J66	货币金融服务	广东省	440000	深圳市	440300
000001	平安银行	2020	2	6	BBB	80.45	BB	77.31	B	71.33	A	88.32	J66	货币金融服务	广东省	440000	深圳市	440300
000001	平安银行	2020	3	6	BBB	81.45	BB	77.31	B	71.78	AA	90.18	J66	货币金融服务	广东省	440000	深圳市	440300
000001	平安银行	2020	4	6	BBB	81.45	BB	77.31	B	71.78	AA	90.18	J66	货币金融服务	广东省	440000	深圳市	440300
000001	平安银行	2021	1	6	BBB	81.34	BB	77.31	B	71.78	A	89.92	J66	货币金融服务	广东省	440000	深圳市	440300
000001	平安银行	2021	2	6	BBB	84.84	A	85.58	BBB	83.58	A	85.47	J66	货币金融服务	广东省	440000	深圳市	440300
000001	平安银行	2021	3	6	BBB	84.99	A	85.58	BBB	83.58	A	85.78	J66	货币金融服务	广东省	440000	深圳市	440300
000001	平安银行	2021	4	6	BBB	84.84	A	85.58	BBB	83.58	A	85.47	J66	货币金融服务	广东省	440000	深圳市	440300
000001	平安银行	2022	1	6	BBB	84.84	A	85.58	BBB	83.58	A	85.47	J66	货币金融服务	广东省	440000	深圳市	440300
000001	平安银行	2022	2	6	BBB	84.91	BBB	83.08	BBB	83.29	A	86.77	J66	货币金融服务	广东省	440000	深圳市	440300
000001	平安银行	2022	3	6	BBB	84.91	BBB	83.08	BBB	83.29	A	86.77	J66	货币金融服务	广东省	440000	深圳市	440300
000001	平安银行	2022	4	6	BBB	84.91	BBB	83.08	BBB	83.29	A	86.77	J66	货币金融服务	广东省	440000	深圳市	440300
000001	平安银行	2023	1	7	A	85.27	BBB	83.08	BBB	83.29	A	87.51	J66	货币金融服务	广东省	440000	深圳市	440300
000001	平安银行	2023	2	7	A	86	BBB	80.81	A	85.52	A	88.3	J66	货币金融服务	广东省	440000	深圳市	440300
000001	平安银行	2023	3	7	A	86.75	BBB	80.81	A	87.69	A	88.3	J66	货币金融服务	广东省	440000	深圳市	440300
000001	平安银行	2023	4	7	A	86.75	BBB	80.81	A	87.69	A	88.3	J66	货币金融服务	广东省	440000	深圳市	440300
000001	平安银行	2024	1	7	A	85.7	BBB	81.38	A	86.12	A	87.03	J66	货币金融服务	广东省	440000	深圳市	440300
000001	平安银行	2024	2	7	A	86.84	BB	77.5	BBB	84.67	A	87.51	J66	货币金融服务	广东省	440000	深圳市	440300
000001	平安银行	2024	3	8	AA	91.45	BB	79.42	A	89.39	A	87.26	J66	货币金融服务	广东省	440000	深圳市	440300
000001	平安银行	2024	4	8	AA	91.58	BB	79.42	A	89.39	A	87.36	J66	货币金融服务	广东省	440000	深圳市	440300
000002	万科A	2009	1	6	BBB	82.77	CC	63.61	A	88.88	BBB	83.3	K70	房地产业	广东省	440000	深圳市	440300
000002	万科A	2009	2	5	BB	79.07	CCC	69.23	BBB	81.92	BB	79.62	K70	房地产业	广东省	440000	深圳市	440300
000002	万科A	2009	3	5	BB	79.85	CCC	69.23	BBB	81.92	BBB	81.4	K70	房地产业	广东省	440000	深圳市	440300
000002	万科A	2009	4	6	BBB	80.3	CCC	69.23	BBB	81.92	BBB	82.41	K70	房地产业	广东省	440000	深圳市	440300
000002	万科A	2010	1	6	BBB	81.08	CCC	69.23	BBB	81.92	BBB	84.19	K70	房地产业	广东省	440000	深圳市	440300
000002	万科A	2010	2	6	BBB	81.47	B	70.8	AA	91.05	BB	75.93	K70	房地产业	广东省	440000	深圳市	440300
000002	万科A	2010	3	6	BBB	82.09	B	70.8	AA	91.05	BB	77.33	K70	房地产业	广东省	440000	深圳市	440300
000002	万科A	2010	4	6	BBB	83.93	B	70.8	AA	91.05	BBB	81.53	K70	房地产业	广东省	440000	深圳市	440300
000002	万科A	2011	1	6	BBB	83.54	B	70.8	AA	91.05	BBB	80.64	K70	房地产业	广东省	440000	深圳市	440300
000002	万科A	2011	2	6	BBB	81.63	CCC	67.21	AA	92.3	BB	76.29	K70	房地产业	广东省	440000	深圳市	440300
000002	万科A	2011	3	6	BBB	81.63	CCC	67.21	AA	92.3	BB	76.29	K70	房地产业	广东省	440000	深圳市	440300
000002	万科A	2011	4	6	BBB	81.81	CCC	67.21	AA	92.72	BB	76.29	K70	房地产业	广东省	440000	深圳市	440300
000002	万科A	2012	1	6	BBB	81.81	CCC	67.21	AA	92.72	BB	76.29	K70	房地产业	广东省	440000	深圳市	440300
000002	万科A	2012	2	6	BBB	84.27	CCC	65.41	AA	91.88	BBB	83.28	K70	房地产业	广东省	440000	深圳市	440300
000002	万科A	2012	3	6	BBB	84.27	CCC	65.41	AA	91.88	BBB	83.28	K70	房地产业	广东省	440000	深圳市	440300
000002	万科A	2012	4	6	BBB	84.27	CCC	65.41	AA	91.88	BBB	83.28	K70	房地产业	广东省	440000	深圳市	440300
000002	万科A	2013	1	6	BBB	84.27	CCC	65.41	AA	91.88	BBB	83.28	K70	房地产业	广东省	440000	深圳市	440300
000002	万科A	2013	2	6	BBB	84.24	B	70.8	AA	93.64	BB	79.77	K70	房地产业	广东省	440000	深圳市	440300
000002	万科A	2013	3	6	BBB	84.24	B	70.8	AA	93.64	BB	79.77	K70	房地产业	广东省	440000	深圳市	440300
000002	万科A	2013	4	6	BBB	83.46	B	70.8	AA	93.64	BB	77.99	K70	房地产业	广东省	440000	深圳市	440300
000002	万科A	2014	1	6	BBB	83.85	B	70.8	AA	93.64	BB	78.88	K70	房地产业	广东省	440000	深圳市	440300
000002	万科A	2014	2	6	BBB	82.85	CC	63.61	AA	91.88	BBB	80.64	K70	房地产业	广东省	440000	深圳市	440300
000002	万科A	2014	3	6	BBB	82.85	CC	63.61	AA	91.88	BBB	80.64	K70	房地产业	广东省	440000	深圳市	440300
000002	万科A	2014	4	6	BBB	83.41	CC	63.61	AA	92.3	BBB	81.53	K70	房地产业	广东省	440000	深圳市	440300
000002	万科A	2015	1	6	BBB	83.02	CC	63.61	AA	92.3	BBB	80.64	K70	房地产业	广东省	440000	深圳市	440300
000002	万科A	2015	2	7	A	85.79	CCC	67.21	AA	93.97	BBB	84.17	K70	房地产业	广东省	440000	深圳市	440300
000002	万科A	2015	3	6	BBB	84.7	CCC	67.21	AA	92.3	BBB	83.28	K70	房地产业	广东省	440000	深圳市	440300
000002	万科A	2015	4	6	BBB	84.7	CCC	67.21	AA	92.3	BBB	83.28	K70	房地产业	广东省	440000	深圳市	440300
000002	万科A	2016	1	6	BBB	84.7	CCC	67.21	AA	92.3	BBB	83.28	K70	房地产业	广东省	440000	深圳市	440300
000002	万科A	2016	2	6	BBB	80.67	CC	62.03	A	89.04	BB	78.88	K70	房地产业	广东省	440000	深圳市	440300
000002	万科A	2016	3	5	BB	79.97	CC	62.03	A	87.37	BB	78.88	K70	房地产业	广东省	440000	深圳市	440300
000002	万科A	2016	4	6	BBB	80.14	CC	62.03	A	87.79	BB	78.88	K70	房地产业	广东省	440000	深圳市	440300
000002	万科A	2017	1	6	BBB	80.14	CC	62.03	A	87.79	BB	78.88	K70	房地产业	广东省	440000	深圳市	440300
000002	万科A	2017	2	6	BBB	84.01	CC	64.51	AA	94.39	BBB	80.61	K70	房地产业	广东省	440000	深圳市	440300
000002	万科A	2017	3	6	BBB	84.1	CC	64.51	AA	92.72	BBB	82.39	K70	房地产业	广东省	440000	深圳市	440300
000002	万科A	2017	4	6	BBB	83.49	CC	64.51	AA	93.13	BBB	80.61	K70	房地产业	广东省	440000	深圳市	440300
000002	万科A	2018	1	6	BBB	83.49	CC	64.51	AA	93.13	BBB	80.61	K70	房地产业	广东省	440000	深圳市	440300
000002	万科A	2018	2	7	A	85.08	CCC	69.91	AA	94.14	BBB	81.5	K70	房地产业	广东省	440000	深圳市	440300
000002	万科A	2018	3	6	BBB	84.13	CCC	69.91	AA	92.47	BBB	80.91	K70	房地产业	广东省	440000	深圳市	440300
000002	万科A	2018	4	6	BBB	83.74	CCC	69.91	AA	92.47	BBB	80.02	K70	房地产业	广东省	440000	深圳市	440300
000002	万科A	2019	1	6	BBB	84.35	CCC	69.91	AA	92.47	BBB	81.42	K70	房地产业	广东省	440000	深圳市	440300
000002	万科A	2019	2	6	BBB	84.23	CC	64.51	AA	94.06	BBB	81.42	K70	房地产业	广东省	440000	深圳市	440300
000002	万科A	2019	3	7	A	85.66	CC	64.51	AA	94.06	BBB	84.68	K70	房地产业	广东省	440000	深圳市	440300
000002	万科A	2019	4	7	A	85.66	CC	64.51	AA	94.06	BBB	84.68	K70	房地产业	广东省	440000	深圳市	440300
000002	万科A	2020	1	7	A	86.05	CC	64.51	AA	94.06	A	85.57	K70	房地产业	广东省	440000	深圳市	440300
000002	万科A	2020	2	7	A	87.52	CC	64.51	AAA	95.73	A	87.33	K70	房地产业	广东省	440000	深圳市	440300
000002	万科A	2020	3	7	A	86.21	CC	64.51	AA	94.06	A	85.93	K70	房地产业	广东省	440000	深圳市	440300
000002	万科A	2020	4	7	A	86.21	CC	64.51	AA	94.06	A	85.93	K70	房地产业	广东省	440000	深圳市	440300
000002	万科A	2021	1	7	A	86.21	CC	64.51	AA	94.06	A	85.93	K70	房地产业	广东省	440000	深圳市	440300
000002	万科A	2021	2	6	BBB	84.53	A	88.66	BBB	83.16	BBB	82.32	K70	房地产业	广东省	440000	深圳市	440300
000002	万科A	2021	3	6	BBB	84.4	A	88.66	BBB	83.16	BBB	82	K70	房地产业	广东省	440000	深圳市	440300
000002	万科A	2021	4	6	BBB	83.9	A	88.66	BBB	83.16	BBB	80.73	K70	房地产业	广东省	440000	深圳市	440300
000002	万科A	2022	1	6	BBB	83.78	A	88.66	BBB	83.16	BBB	80.41	K70	房地产业	广东省	440000	深圳市	440300
000002	万科A	2022	2	7	A	85.01	A	86.64	A	85.89	BBB	83.06	K70	房地产业	广东省	440000	深圳市	440300
000002	万科A	2022	3	7	A	85.01	A	86.64	A	85.89	BBB	83.06	K70	房地产业	广东省	440000	深圳市	440300
000002	万科A	2022	4	7	A	85.55	A	86.64	A	85.6	BBB	84.65	K70	房地产业	广东省	440000	深圳市	440300
000002	万科A	2023	1	7	A	85.11	A	86.64	A	85.6	BBB	83.55	K70	房地产业	广东省	440000	深圳市	440300
000002	万科A	2023	2	6	BBB	82.52	A	86.37	BB	77.11	BBB	83.59	K70	房地产业	广东省	440000	深圳市	440300
000002	万科A	2023	3	6	BBB	83.83	A	86.53	BB	77.11	A	86.77	K70	房地产业	广东省	440000	深圳市	440300
000002	万科A	2023	4	6	BBB	83.78	A	86.37	BB	77.11	A	86.77	K70	房地产业	广东省	440000	深圳市	440300
000002	万科A	2024	1	6	BBB	83.57	A	86.24	BB	76.54	A	86.77	K70	房地产业	广东省	440000	深圳市	440300
000002	万科A	2024	2	6	BBB	82.57	BBB	80.81	BB	76.28	A	85.38	K70	房地产业	广东省	440000	深圳市	440300
000002	万科A	2024	3	7	A	87.62	A	86.63	BB	77.04	A	86.03	K70	房地产业	广东省	440000	深圳市	440300
000002	万科A	2024	4	7	A	87.45	A	86.63	BB	78.11	A	85.59	K70	房地产业	广东省	440000	深圳市	440300
000004	*ST 国农	2009	1	3	CCC	66.4	C	47.5	C	57.74	BBB	81.9	G54	道路运输业	广东省	440000	深圳市	440300
000004	*ST 国农	2009	2	3	CCC	66.07	C	47.5	CCC	65.26	BB	76.09	G54	道路运输业	广东省	440000	深圳市	440300
000004	*ST 国农	2009	3	3	CCC	66.44	C	47.5	CCC	65.26	BB	76.91	G54	道路运输业	广东省	440000	深圳市	440300
000004	*ST 国农	2009	4	3	CCC	66.52	C	47.5	CCC	65.26	BB	77.09	G54	道路运输业	广东省	440000	深圳市	440300
000004	*ST 国农	2010	1	2	CC	61.27	C	47.5	CCC	65.26	CCC	65.61	C27	医药制造业	广东省	440000	深圳市	440300
000004	*ST 国农	2010	2	2	CC	63.24	C	51.08	CCC	67.84	CCC	66.34	C27	医药制造业	广东省	440000	深圳市	440300
000004	*ST 国农	2010	3	2	CC	63.61	C	51.08	CCC	67.84	CCC	67.16	C27	医药制造业	广东省	440000	深圳市	440300
000004	*ST 国农	2010	4	3	CCC	65.44	C	51.08	CCC	67.84	B	71.15	C27	医药制造业	广东省	440000	深圳市	440300
000004	国农科技	2011	1	3	CCC	68.07	C	51.08	CCC	67.84	BB	76.89	C27	医药制造业	广东省	440000	深圳市	440300
000004	国农科技	2011	2	3	CCC	65.83	C	54.24	CC	64.63	B	72.55	C27	医药制造业	广东省	440000	深圳市	440300
000004	国农科技	2011	3	3	CCC	65.83	C	54.24	CC	64.63	B	72.55	C27	医药制造业	广东省	440000	深圳市	440300
000004	国农科技	2011	4	3	CCC	69.02	C	54.24	CC	64.63	BB	79.53	C27	医药制造业	广东省	440000	深圳市	440300
000004	国农科技	2012	1	4	B	70.33	C	54.24	CC	64.63	BBB	82.4	C27	医药制造业	广东省	440000	深圳市	440300
000004	国农科技	2012	2	4	B	72.36	C	52.45	B	72.54	BBB	82.4	C27	医药制造业	广东省	440000	深圳市	440300
000004	国农科技	2012	3	4	B	71.9	C	52.45	B	72.54	BBB	81.4	C27	医药制造业	广东省	440000	深圳市	440300
000004	国农科技	2012	4	4	B	71.15	C	52.45	B	72.54	BB	79.77	C27	医药制造业	广东省	440000	深圳市	440300
000004	国农科技	2013	1	4	B	72.84	C	52.45	B	72.54	BBB	83.46	C27	医药制造业	广东省	440000	深圳市	440300
000004	国农科技	2013	2	3	CCC	69.48	C	52.45	CC	61.64	BBB	83.46	C27	医药制造业	广东省	440000	深圳市	440300
000004	国农科技	2013	3	4	B	70.31	C	52.45	CC	61.64	A	85.27	C27	医药制造业	广东省	440000	深圳市	440300
000004	国农科技	2013	4	4	B	70.68	C	52.45	CC	61.64	A	86.09	C27	医药制造业	广东省	440000	深圳市	440300
000004	国农科技	2014	1	3	CCC	69.85	C	52.45	CC	61.64	BBB	84.28	C27	医药制造业	广东省	440000	深圳市	440300
000004	国农科技	2014	2	3	CCC	65.33	C	50.87	C	53.04	BBB	81	C27	医药制造业	广东省	440000	深圳市	440300
000004	国农科技	2014	3	3	CCC	65.7	C	50.87	C	53.04	BBB	81.82	C27	医药制造业	广东省	440000	深圳市	440300
000004	国农科技	2014	4	3	CCC	65.7	C	50.87	C	53.04	BBB	81.82	C27	医药制造业	广东省	440000	深圳市	440300
000004	国农科技	2015	1	2	CC	64.2	C	50.87	C	53.04	BB	78.54	C27	医药制造业	广东省	440000	深圳市	440300
000004	国农科技	2015	2	3	CCC	65.81	C	52.66	C	58.1	BB	77.72	C27	医药制造业	广东省	440000	深圳市	440300
000004	国农科技	2015	3	3	CCC	66.18	C	52.66	C	58.1	BB	78.54	C27	医药制造业	广东省	440000	深圳市	440300
000004	国农科技	2015	4	3	CCC	66.18	C	52.66	C	58.1	BB	78.54	C27	医药制造业	广东省	440000	深圳市	440300
000004	国农科技	2016	1	3	CCC	66.18	C	52.66	C	58.1	BB	78.54	C27	医药制造业	广东省	440000	深圳市	440300
000004	国农科技	2016	2	3	CCC	66.57	C	50.87	CC	63.13	BB	76.9	C27	医药制造业	广东省	440000	深圳市	440300
000004	国农科技	2016	3	2	CC	61.69	C	50.87	CC	63.13	CCC	66.24	C27	医药制造业	广东省	440000	深圳市	440300
000004	国农科技	2016	4	2	CC	62.06	C	50.87	CC	63.13	CCC	67.06	C27	医药制造业	广东省	440000	深圳市	440300
000004	国农科技	2017	1	2	CC	62.06	C	50.87	CC	63.13	CCC	67.06	C27	医药制造业	广东省	440000	深圳市	440300
000004	国农科技	2017	2	2	CC	63.6	C	49.98	C	59.06	B	73.61	C27	医药制造业	广东省	440000	深圳市	440300
000004	国农科技	2017	3	3	CCC	66.6	C	49.98	C	59.06	BBB	80.17	C27	医药制造业	广东省	440000	深圳市	440300
000004	国农科技	2017	4	3	CCC	66.38	C	49.98	CC	60.78	BB	78.53	C27	医药制造业	广东省	440000	深圳市	440300
000004	国农科技	2018	1	3	CCC	65.63	C	49.98	CC	60.78	BB	76.89	C27	医药制造业	广东省	440000	深圳市	440300
000004	国农科技	2018	2	2	CC	64.13	C	49.98	C	57.74	BB	75.67	C27	医药制造业	广东省	440000	深圳市	440300
000004	国农科技	2018	3	2	CC	62.38	C	49.98	C	57.74	B	71.84	C27	医药制造业	广东省	440000	深圳市	440300
000004	国农科技	2018	4	1	C	58.76	C	49.98	C	57.74	CC	63.92	C27	医药制造业	广东省	440000	深圳市	440300
000004	国农科技	2019	1	1	C	57.01	C	49.98	C	57.74	CC	60.09	C27	医药制造业	广东省	440000	深圳市	440300
000004	国农科技	2019	2	1	C	57.76	C	48.19	CC	64.8	C	57.9	C27	医药制造业	广东省	440000	深圳市	440300
000004	国农科技	2019	3	1	C	58.06	C	48.19	CC	64.8	C	58.56	C27	医药制造业	广东省	440000	深圳市	440300
000004	国农科技	2019	4	2	CC	61.07	C	48.19	CC	64.8	CCC	65.13	C27	医药制造业	广东省	440000	深圳市	440300
000004	国华网安	2020	1	2	CC	62.27	C	48.19	CC	64.8	CCC	67.76	I65	软件和信息技术服务业	广东省	440000	深圳市	440300
000004	国华网安	2020	2	2	CC	64.97	C	50.21	BB	75.88	CCC	67.61	I65	软件和信息技术服务业	广东省	440000	深圳市	440300
000004	国华网安	2020	3	3	CCC	67.71	C	50.21	BB	75.88	B	72.96	I65	软件和信息技术服务业	广东省	440000	深圳市	440300
000004	国华网安	2020	4	3	CCC	69.57	C	50.21	BB	75.88	BB	76.58	I65	软件和信息技术服务业	广东省	440000	深圳市	440300
000004	国华网安	2021	1	3	CCC	69.57	C	50.21	BB	75.88	BB	76.58	I65	软件和信息技术服务业	广东省	440000	深圳市	440300
000004	国华网安	2021	2	4	B	73.37	C	56.14	B	72.69	BB	79.15	I65	软件和信息技术服务业	广东省	440000	深圳市	440300
000004	国华网安	2021	3	4	B	74.45	C	56.14	B	72.69	BBB	81.41	I65	软件和信息技术服务业	广东省	440000	深圳市	440300
000004	国华网安	2021	4	4	B	74.59	C	56.14	B	72.97	BBB	81.49	I65	软件和信息技术服务业	广东省	440000	深圳市	440300
000004	ST 国华	2022	1	4	B	73.95	C	56.14	B	72.97	BBB	80.14	I65	软件和信息技术服务业	广东省	440000	深圳市	440300
000004	ST 国华	2022	2	3	CCC	69.71	C	56.14	B	71.77	B	72.19	I65	软件和信息技术服务业	广东省	440000	深圳市	440300
000004	ST 国华	2022	3	4	B	70.35	C	56.14	B	71.77	B	73.55	I65	软件和信息技术服务业	广东省	440000	深圳市	440300
000004	ST 国华	2022	4	4	B	71.55	C	56.14	B	72.04	BB	75.84	I65	软件和信息技术服务业	广东省	440000	深圳市	440300
000004	国华网安	2023	1	3	CCC	67.84	C	56.14	B	72.04	CCC	68.05	I65	软件和信息技术服务业	广东省	440000	深圳市	440300
000004	国华网安	2023	2	3	CCC	67.24	C	56.14	B	72.85	CCC	66.15	I65	软件和信息技术服务业	广东省	440000	深圳市	440300
000004	国华网安	2023	3	3	CCC	66.74	C	56.14	B	72.85	CCC	65.09	I65	软件和信息技术服务业	广东省	440000	深圳市	440300
000004	国华网安	2023	4	3	CCC	67.5	C	56.14	B	72.86	CCC	66.68	I65	软件和信息技术服务业	广东省	440000	深圳市	440300
000004	国华网安	2024	1	3	CCC	66.6	C	56.14	B	71.44	CCC	65.93	I65	软件和信息技术服务业	广东省	440000	深圳市	440300
000004	国华网安	2024	2	1	C	56.95	C	56.14	B	70.83	CCC	69.24	I65	软件和信息技术服务业	广东省	440000	深圳市	440300
000004	国华网安	2024	3	1	C	57.62	C	56.14	B	72.33	CCC	66.02	I65	软件和信息技术服务业	广东省	440000	深圳市	440300
000004	国华网安	2024	4	1	C	53.01	C	56.14	B	73.48	C	58.6	I65	软件和信息技术服务业	广东省	440000	深圳市	440300
000005	世纪星源	2009	1	3	CCC	66.32	C	54.06	C	51.52	BBB	82.78	S90	综合	广东省	440000	深圳市	440300
000005	世纪星源	2009	2	3	CCC	67	C	56.79	C	56.17	BB	79.55	S90	综合	广东省	440000	深圳市	440300
000005	世纪星源	2009	3	3	CCC	67	C	56.79	C	56.17	BB	79.55	S90	综合	广东省	440000	深圳市	440300
000005	世纪星源	2009	4	3	CCC	67	C	56.79	C	56.17	BB	79.55	S90	综合	广东省	440000	深圳市	440300
000005	世纪星源	2010	1	3	CCC	67	C	56.79	C	56.17	BB	79.55	S90	综合	广东省	440000	深圳市	440300
000005	世纪星源	2010	2	2	CC	64.99	C	59.78	C	56.17	B	73.94	S90	综合	广东省	440000	深圳市	440300
000005	世纪星源	2010	3	2	CC	64.25	C	59.78	C	56.17	B	72.32	S90	综合	广东省	440000	深圳市	440300
000005	世纪星源	2010	4	2	CC	64.25	C	59.78	C	56.17	B	72.32	S90	综合	广东省	440000	深圳市	440300
000005	世纪星源	2011	1	2	CC	64.25	C	59.78	C	56.17	B	72.32	S90	综合	广东省	440000	深圳市	440300
000005	世纪星源	2011	2	2	CC	61.66	C	56.79	C	53.07	B	70.3	S90	综合	广东省	440000	深圳市	440300
000005	世纪星源	2011	3	2	CC	61.29	C	56.79	C	53.07	CCC	69.49	S90	综合	广东省	440000	深圳市	440300
000005	世纪星源	2011	4	2	CC	61.29	C	56.79	C	53.07	CCC	69.49	S90	综合	广东省	440000	深圳市	440300
000005	世纪星源	2012	1	2	CC	61.29	C	56.79	C	53.07	CCC	69.49	K70	房地产业	广东省	440000	深圳市	440300
000005	世纪星源	2012	2	3	CCC	66.02	C	55.11	CC	62.71	B	73.08	K70	房地产业	广东省	440000	深圳市	440300
000005	世纪星源	2012	3	3	CCC	67.32	C	55.11	CC	62.71	BB	75.91	K70	房地产业	广东省	440000	深圳市	440300
000005	世纪星源	2012	4	3	CCC	67.32	C	55.11	CC	62.71	BB	75.91	K70	房地产业	广东省	440000	深圳市	440300
000005	世纪星源	2013	1	3	CCC	67.32	C	55.11	CC	62.71	BB	75.91	K70	房地产业	广东省	440000	深圳市	440300
000005	世纪星源	2013	2	2	CC	63.74	C	55.11	C	51.52	BB	76.72	K70	房地产业	广东省	440000	深圳市	440300
000005	世纪星源	2013	3	2	CC	63.74	C	55.11	C	51.52	BB	76.72	K70	房地产业	广东省	440000	深圳市	440300
000005	世纪星源	2013	4	2	CC	63.37	C	55.11	C	51.52	BB	75.91	K70	房地产业	广东省	440000	深圳市	440300
000005	世纪星源	2014	1	2	CC	63.37	C	55.11	C	51.52	BB	75.91	K70	房地产业	广东省	440000	深圳市	440300
000005	世纪星源	2014	2	2	CC	62.97	C	53.95	C	54.62	B	73.13	K70	房地产业	广东省	440000	深圳市	440300
000005	世纪星源	2014	3	2	CC	63.71	C	53.95	C	54.62	B	74.74	K70	房地产业	广东省	440000	深圳市	440300
000005	世纪星源	2014	4	2	CC	63.34	C	53.95	C	54.62	B	73.94	K70	房地产业	广东省	440000	深圳市	440300
000005	世纪星源	2015	1	2	CC	62.6	C	53.95	C	54.62	B	72.32	K70	房地产业	广东省	440000	深圳市	440300
000005	世纪星源	2015	2	3	CCC	67.14	C	58.62	C	59.28	BB	76.72	K70	房地产业	广东省	440000	深圳市	440300
000005	世纪星源	2015	3	3	CCC	67.14	C	58.62	C	59.28	BB	76.72	K70	房地产业	广东省	440000	深圳市	440300
000005	世纪星源	2015	4	3	CCC	66.77	C	58.62	C	59.28	BB	75.91	K70	房地产业	广东省	440000	深圳市	440300
000005	世纪星源	2016	1	3	CCC	66.77	C	58.62	C	59.28	BB	75.91	N77	生态保护和环境治理业	广东省	440000	深圳市	440300
000005	世纪星源	2016	2	3	CCC	65.25	C	59.26	C	59.28	B	72.32	N77	生态保护和环境治理业	广东省	440000	深圳市	440300
000005	世纪星源	2016	3	3	CCC	65.25	C	59.26	C	59.28	B	72.32	N77	生态保护和环境治理业	广东省	440000	深圳市	440300
000005	世纪星源	2016	4	3	CCC	65.25	C	59.26	C	59.28	B	72.32	N77	生态保护和环境治理业	广东省	440000	深圳市	440300
000005	世纪星源	2017	1	3	CCC	65.25	C	59.26	C	59.28	B	72.32	N77	生态保护和环境治理业	广东省	440000	深圳市	440300
000005	世纪星源	2017	2	3	CCC	66.58	C	57.58	C	59.28	BB	75.91	N77	生态保护和环境治理业	广东省	440000	深圳市	440300
000005	世纪星源	2017	3	3	CCC	66.58	C	57.58	C	59.28	BB	75.91	N77	生态保护和环境治理业	广东省	440000	深圳市	440300
000005	世纪星源	2017	4	3	CCC	66.95	C	57.58	C	59.28	BB	76.72	N77	生态保护和环境治理业	广东省	440000	深圳市	440300
000005	世纪星源	2018	1	3	CCC	66.58	C	57.58	C	59.28	BB	75.91	N77	生态保护和环境治理业	广东省	440000	深圳市	440300
000005	世纪星源	2018	2	3	CCC	65.91	C	54.06	C	59.28	BB	75.91	N77	生态保护和环境治理业	广东省	440000	深圳市	440300
000005	世纪星源	2018	3	2	CC	63.94	C	54.06	C	59.28	B	71.6	N77	生态保护和环境治理业	广东省	440000	深圳市	440300
000005	世纪星源	2018	4	2	CC	63.94	C	54.06	C	59.28	B	71.6	N77	生态保护和环境治理业	广东省	440000	深圳市	440300
000005	世纪星源	2019	1	2	CC	63.94	C	54.06	C	59.28	B	71.6	N77	生态保护和环境治理业	广东省	440000	深圳市	440300
000005	世纪星源	2019	2	3	CCC	67.58	C	54.06	CCC	67.52	B	73.22	N77	生态保护和环境治理业	广东省	440000	深圳市	440300
000005	世纪星源	2019	3	3	CCC	67.58	C	54.06	CCC	67.52	B	73.22	N77	生态保护和环境治理业	广东省	440000	深圳市	440300
000005	世纪星源	2019	4	3	CCC	67.95	C	54.06	CCC	67.52	B	74.03	N77	生态保护和环境治理业	广东省	440000	深圳市	440300
000005	世纪星源	2020	1	3	CCC	67.58	C	54.06	CCC	67.52	B	73.22	N77	生态保护和环境治理业	广东省	440000	深圳市	440300
000005	世纪星源	2020	2	3	CCC	67.27	C	54.58	CC	64.26	B	74.83	N77	生态保护和环境治理业	广东省	440000	深圳市	440300
000005	世纪星源	2020	3	3	CCC	65.88	C	54.06	CC	64.26	B	72	N77	生态保护和环境治理业	广东省	440000	深圳市	440300
000005	世纪星源	2020	4	3	CCC	65.29	C	52.9	CC	64.26	B	71.2	N77	生态保护和环境治理业	广东省	440000	深圳市	440300
000005	ST 星源	2021	1	3	CCC	65.29	C	52.9	CC	64.26	B	71.2	N77	生态保护和环境治理业	广东省	440000	深圳市	440300
000005	ST 星源	2021	2	3	CCC	66.97	C	59.88	B	70.14	B	73.52	N77	生态保护和环境治理业	广东省	440000	深圳市	440300
000005	ST 星源	2021	3	3	CCC	66.97	C	59.88	B	70.14	B	73.52	N77	生态保护和环境治理业	广东省	440000	深圳市	440300
000005	ST 星源	2021	4	3	CCC	67.16	C	59.88	B	70.14	B	74.05	N77	生态保护和环境治理业	广东省	440000	深圳市	440300
000005	ST 星源	2022	1	3	CCC	67.16	C	59.88	B	70.14	B	74.05	N77	生态保护和环境治理业	广东省	440000	深圳市	440300
000005	ST 星源	2022	2	2	CC	64.78	C	59.88	CCC	68.92	CCC	68.13	N77	生态保护和环境治理业	广东省	440000	深圳市	440300
000005	ST 星源	2022	3	3	CCC	65.39	C	59.88	CCC	68.92	CCC	69.84	N77	生态保护和环境治理业	广东省	440000	深圳市	440300
000005	ST 星源	2022	4	3	CCC	65.68	C	59.88	CCC	68.92	B	70.64	N77	生态保护和环境治理业	广东省	440000	深圳市	440300
000005	ST 星源	2023	1	2	CC	63.12	C	59.88	CCC	68.92	CC	63.48	N77	生态保护和环境治理业	广东省	440000	深圳市	440300
000005	ST 星源	2023	2	2	CC	62.72	C	59.88	CCC	67.55	CC	63.2	N77	生态保护和环境治理业	广东省	440000	深圳市	440300
000005	ST 星源	2023	3	2	CC	62.54	C	57.02	CCC	68.84	CC	63.2	N77	生态保护和环境治理业	广东省	440000	深圳市	440300
000005	ST 星源	2023	4	2	CC	62.72	C	59.88	CCC	67.55	CC	63.2	N77	生态保护和环境治理业	广东省	440000	深圳市	440300
000005	ST 星源	2024	1	2	CC	64.24	CC	64.63	CCC	67.55	CC	61.77	N77	生态保护和环境治理业	广东省	440000	深圳市	440300
000006	深振业A	2009	1	5	BB	79.86	C	59.1	BBB	84.93	BBB	81.91	K70	房地产业	广东省	440000	深圳市	440300
000006	深振业A	2009	2	6	BBB	80.83	CCC	69.01	A	85.68	BBB	80.13	K70	房地产业	广东省	440000	深圳市	440300
000006	深振业A	2009	3	6	BBB	81.61	CCC	69.01	A	85.68	BBB	81.91	K70	房地产业	广东省	440000	深圳市	440300
000006	深振业A	2009	4	5	BB	77.53	CCC	69.01	A	85.68	B	72.63	K70	房地产业	广东省	440000	深圳市	440300
000006	深振业A	2010	1	5	BB	78.31	CCC	69.01	A	85.68	B	74.41	K70	房地产业	广东省	440000	深圳市	440300
000006	深振业A	2010	2	6	BBB	81.52	CCC	67.21	A	86.1	BBB	81.91	K70	房地产业	广东省	440000	深圳市	440300
000006	深振业A	2010	3	6	BBB	81.52	CCC	67.21	A	86.1	BBB	81.91	K70	房地产业	广东省	440000	深圳市	440300
000006	深振业A	2010	4	5	BB	77.84	CCC	67.21	A	86.1	B	73.52	K70	房地产业	广东省	440000	深圳市	440300
000006	深振业A	2011	1	5	BB	77.05	CCC	67.21	A	86.1	B	71.74	K70	房地产业	广东省	440000	深圳市	440300
000006	深振业A	2011	2	6	BBB	83.24	CCC	65.41	AA	90.86	BBB	81.91	K70	房地产业	广东省	440000	深圳市	440300
000006	深振业A	2011	3	6	BBB	82.85	CCC	65.41	AA	90.86	BBB	81.02	K70	房地产业	广东省	440000	深圳市	440300
000006	深振业A	2011	4	6	BBB	82.85	CCC	65.41	AA	90.86	BBB	81.02	K70	房地产业	广东省	440000	深圳市	440300
000006	深振业A	2012	1	6	BBB	82.46	CCC	65.41	AA	90.86	BBB	80.13	K70	房地产业	广东省	440000	深圳市	440300
000006	深振业A	2012	2	6	BBB	80.72	CCC	65.41	A	86.68	BBB	80.13	K70	房地产业	广东省	440000	深圳市	440300
000006	深振业A	2012	3	6	BBB	80.33	CCC	65.41	A	86.68	BB	79.24	K70	房地产业	广东省	440000	深圳市	440300
000006	深振业A	2012	4	6	BBB	80.72	CCC	65.41	A	86.68	BBB	80.13	K70	房地产业	广东省	440000	深圳市	440300
000006	深振业A	2013	1	6	BBB	80.72	CCC	65.41	A	86.68	BBB	80.13	K70	房地产业	广东省	440000	深圳市	440300
000006	深振业A	2013	2	5	BB	80	CC	62.03	A	85.18	BBB	81.02	K70	房地产业	广东省	440000	深圳市	440300
000006	深振业A	2013	3	5	BB	79.3	CC	62.03	BBB	83.51	BBB	81.02	K70	房地产业	广东省	440000	深圳市	440300
000006	深振业A	2013	4	6	BBB	80.09	CC	62.03	BBB	83.51	BBB	82.8	K70	房地产业	广东省	440000	深圳市	440300
000006	深振业A	2014	1	6	BBB	80.09	CC	62.03	BBB	83.51	BBB	82.8	K70	房地产业	广东省	440000	深圳市	440300
000006	深振业A	2014	2	6	BBB	81.97	CC	62.03	A	87.1	BBB	83.68	K70	房地产业	广东省	440000	深圳市	440300
000006	深振业A	2014	3	6	BBB	80.89	CC	62.03	A	85.43	BBB	82.8	K70	房地产业	广东省	440000	深圳市	440300
000006	深振业A	2014	4	6	BBB	81.06	CC	62.03	A	85.85	BBB	82.8	K70	房地产业	广东省	440000	深圳市	440300
000006	深振业A	2015	1	6	BBB	81.06	CC	62.03	A	85.85	BBB	82.8	K70	房地产业	广东省	440000	深圳市	440300
000006	深振业A	2015	2	5	BB	78.18	C	53.09	BBB	83.9	BBB	81.04	K70	房地产业	广东省	440000	深圳市	440300
000006	深振业A	2015	3	5	BB	78.57	C	53.09	BBB	83.9	BBB	81.93	K70	房地产业	广东省	440000	深圳市	440300
000006	深振业A	2015	4	5	BB	79.01	C	53.09	BBB	83.49	BBB	83.33	K70	房地产业	广东省	440000	深圳市	440300
000006	深圳业A	2016	1	5	BB	79.41	C	53.09	BBB	83.49	BBB	84.21	K70	房地产业	广东省	440000	深圳市	440300
000006	深圳业A	2016	2	6	BBB	81.76	C	57.3	A	86.77	A	85.08	K70	房地产业	广东省	440000	深圳市	440300
000006	深圳业A	2016	3	6	BBB	81.76	C	57.3	A	86.77	A	85.08	K70	房地产业	广东省	440000	深圳市	440300
000006	深圳业A	2016	4	6	BBB	81.37	C	57.3	A	86.77	BBB	84.19	K70	房地产业	广东省	440000	深圳市	440300
000006	深振业A	2017	1	6	BBB	81.37	C	57.3	A	86.77	BBB	84.19	K70	房地产业	广东省	440000	深圳市	440300
000006	深振业A	2017	2	6	BBB	84.13	CC	61.58	AA	90.44	A	85.59	K70	房地产业	广东省	440000	深圳市	440300
000006	深振业A	2017	3	6	BBB	83.74	CC	61.58	AA	90.44	BBB	84.7	K70	房地产业	广东省	440000	深圳市	440300
000006	深振业A	2017	4	6	BBB	83.74	CC	61.58	AA	90.44	BBB	84.7	K70	房地产业	广东省	440000	深圳市	440300
000006	深振业A	2018	1	6	BBB	83.35	CC	61.58	AA	90.44	BBB	83.81	K70	房地产业	广东省	440000	深圳市	440300
000006	深振业A	2018	2	6	BBB	81.95	CC	60	A	86.68	BBB	84.7	K70	房地产业	广东省	440000	深圳市	440300
000006	深振业A	2018	3	6	BBB	82.34	CC	60	A	86.68	A	85.59	K70	房地产业	广东省	440000	深圳市	440300
000006	深振业A	2018	4	6	BBB	82.34	CC	60	A	86.68	A	85.59	K70	房地产业	广东省	440000	深圳市	440300
000006	深振业A	2019	1	6	BBB	82.34	CC	60	A	86.68	A	85.59	K70	房地产业	广东省	440000	深圳市	440300
000006	深振业A	2019	2	6	BBB	82.59	CC	60	A	86.35	A	86.48	K70	房地产业	广东省	440000	深圳市	440300
000006	深振业A	2019	3	6	BBB	82.59	CC	60	A	86.35	A	86.48	K70	房地产业	广东省	440000	深圳市	440300
000006	深振业A	2019	4	6	BBB	82.77	CC	60	A	86.77	A	86.48	K70	房地产业	广东省	440000	深圳市	440300
000006	深振业A	2020	1	6	BBB	82.77	CC	60	A	86.77	A	86.48	K70	房地产业	广东省	440000	深圳市	440300
000006	深振业A	2020	2	6	BBB	82.16	C	56.75	A	86.43	A	86.48	K70	房地产业	广东省	440000	深圳市	440300
000006	深振业A	2020	3	6	BBB	83.39	C	56.75	A	86.43	A	89.28	K70	房地产业	广东省	440000	深圳市	440300
000006	深振业A	2020	4	6	BBB	83.39	C	56.75	A	86.43	A	89.28	K70	房地产业	广东省	440000	深圳市	440300
000006	深振业A	2021	1	6	BBB	80.93	C	56.75	A	86.43	BBB	83.68	K70	房地产业	广东省	440000	深圳市	440300
000006	深振业A	2021	2	5	BB	77.03	CCC	68.59	BBB	80.75	BBB	80.84	K70	房地产业	广东省	440000	深圳市	440300
000006	深振业A	2021	3	5	BB	77.03	CCC	68.59	BBB	80.75	BBB	80.84	K70	房地产业	广东省	440000	深圳市	440300
000006	深振业A	2021	4	5	BB	75.11	CCC	68.59	BB	77.04	BB	78.77	K70	房地产业	广东省	440000	深圳市	440300
000006	深振业A	2022	1	5	BB	75.11	CCC	68.59	BB	77.04	BB	78.77	K70	房地产业	广东省	440000	深圳市	440300
000006	深振业A	2022	2	4	B	72.91	CCC	67.94	BB	75.43	B	74.92	K70	房地产业	广东省	440000	深圳市	440300
000006	深振业A	2022	3	4	B	72.91	CCC	67.94	BB	75.43	B	74.92	K70	房地产业	广东省	440000	深圳市	440300
000006	深振业A	2022	4	4	B	73.32	CCC	67.94	BB	75.43	BB	75.95	K70	房地产业	广东省	440000	深圳市	440300
000006	深振业A	2023	1	4	B	72.7	CCC	67.94	BB	75.43	B	74.37	K70	房地产业	广东省	440000	深圳市	440300
000006	深振业A	2023	2	5	BB	78.93	B	73.49	A	87.05	BB	77.07	K70	房地产业	广东省	440000	深圳市	440300
000006	深振业A	2023	3	5	BB	78.93	B	73.49	A	87.05	BB	77.07	K70	房地产业	广东省	440000	深圳市	440300
000006	深振业A	2023	4	5	BB	79.07	B	73.49	A	87.05	BB	77.42	K70	房地产业	广东省	440000	深圳市	440300
000006	深振业A	2024	1	5	BB	79.88	BB	75.41	A	87.05	BB	77.97	K70	房地产业	广东省	440000	深圳市	440300
000006	深振业A	2024	2	5	BB	76.26	B	72.22	A	85.28	BB	77.92	K70	房地产业	广东省	440000	深圳市	440300
000006	深振业A	2024	3	5	BB	78.77	B	74.15	BBB	83.16	BBB	80.15	K70	房地产业	广东省	440000	深圳市	440300
000006	深振业A	2024	4	6	BBB	80.18	BB	76.63	BBB	82.85	BBB	81.1	K70	房地产业	广东省	440000	深圳市	440300
000007	ST 零七A	2009	1	4	B	72.88	CC	60.06	B	72.88	BB	77.1	K70	房地产业	广东省	440000	深圳市	440300
000007	ST 零七A	2009	2	4	B	70.6	C	55.11	B	74.97	B	71.56	K70	房地产业	广东省	440000	深圳市	440300
000007	ST 零七A	2009	3	4	B	70.6	C	55.11	B	74.97	B	71.56	K70	房地产业	广东省	440000	深圳市	440300
000007	ST 零七A	2009	4	4	B	70.6	C	55.11	B	74.97	B	71.56	K70	房地产业	广东省	440000	深圳市	440300
000007	ST 零七A	2010	1	4	B	70.6	C	55.11	B	74.97	B	71.56	H61	住宿业	广东省	440000	深圳市	440300
000007	ST 零七A	2010	2	4	B	71.44	C	55.11	B	74.97	B	73.48	H61	住宿业	广东省	440000	深圳市	440300
000007	ST 零七A	2010	3	4	B	71.44	C	55.11	B	74.97	B	73.48	H61	住宿业	广东省	440000	深圳市	440300
000007	ST 零七A	2010	4	4	B	71.44	C	55.11	B	74.97	B	73.48	H61	住宿业	广东省	440000	深圳市	440300
000007	ST 零七A	2011	1	4	B	71.44	C	55.11	B	74.97	B	73.48	H61	住宿业	广东省	440000	深圳市	440300
000007	ST 零七A	2011	2	4	B	70.66	C	56.47	B	72.63	B	73.48	H61	住宿业	广东省	440000	深圳市	440300
000007	ST 零七A	2011	3	4	B	70.27	C	56.47	B	72.63	B	72.59	H61	住宿业	广东省	440000	深圳市	440300
000007	ST 零七A	2011	4	4	B	71.83	C	56.47	B	72.63	BB	76.15	H61	住宿业	广东省	440000	深圳市	440300
000007	零七股份	2012	1	3	CCC	67.01	C	56.47	B	72.63	CCC	65.18	H61	住宿业	广东省	440000	深圳市	440300
000007	零七股份	2012	2	3	CCC	65.53	C	54.89	B	70.54	CC	64.29	H61	住宿业	广东省	440000	深圳市	440300
000007	零七股份	2012	3	3	CCC	65.62	C	54.89	B	70.54	CC	64.51	H61	住宿业	广东省	440000	深圳市	440300
000007	零七股份	2012	4	3	CCC	65.62	C	54.89	B	70.54	CC	64.51	H61	住宿业	广东省	440000	深圳市	440300
000007	零七股份	2013	1	3	CCC	67.45	C	54.89	B	70.54	CCC	68.66	H61	住宿业	广东省	440000	深圳市	440300
000007	零七股份	2013	2	4	B	74.23	CCC	65.02	BBB	83.32	CCC	68.66	H61	住宿业	广东省	440000	深圳市	440300
000007	零七股份	2013	3	4	B	74.52	CCC	65.02	BBB	83.32	CCC	69.33	H61	住宿业	广东省	440000	深圳市	440300
000007	零七股份	2013	4	4	B	71.92	CCC	65.02	BBB	83.32	CC	63.4	H61	住宿业	广东省	440000	深圳市	440300
000007	零七股份	2014	1	4	B	72.92	CCC	65.02	BBB	83.32	CCC	65.69	H61	住宿业	广东省	440000	深圳市	440300
000007	零七股份	2014	2	2	CC	64.62	CCC	65.02	B	72.88	C	56.67	H61	住宿业	广东省	440000	深圳市	440300
000007	零七股份	2014	3	3	CCC	65.04	CCC	65.02	B	72.88	C	57.62	H61	住宿业	广东省	440000	深圳市	440300
000007	零七股份	2014	4	3	CCC	66.43	CCC	65.02	B	72.88	CC	60.8	H61	住宿业	广东省	440000	深圳市	440300
000007	全新好	2015	1	3	CCC	66.43	CCC	65.02	B	72.88	CC	60.8	H61	住宿业	广东省	440000	深圳市	440300
000007	全新好	2015	2	2	CC	64.38	CC	63.44	B	72.88	C	56.66	H61	住宿业	广东省	440000	深圳市	440300
000007	全新好	2015	3	1	C	59.81	CC	63.44	B	72.88	C	46.24	H61	住宿业	广东省	440000	深圳市	440300
000007	全新好	2015	4	2	CC	60.59	CC	63.44	B	72.88	C	48.02	H61	住宿业	广东省	440000	深圳市	440300
000007	全新好	2016	1	2	CC	60.59	CC	63.44	B	72.88	C	48.02	H61	住宿业	广东省	440000	深圳市	440300
000007	全新好	2016	2	2	CC	62.66	CCC	65.02	B	72.88	C	52.23	H61	住宿业	广东省	440000	深圳市	440300
000007	全新好	2016	3	2	CC	62.54	CCC	65.02	B	72.88	C	51.94	H61	住宿业	广东省	440000	深圳市	440300
000007	全新好	2016	4	2	CC	62.54	CCC	65.02	B	72.88	C	51.94	H61	住宿业	广东省	440000	深圳市	440300
000007	全新好	2017	1	2	CC	63.43	CCC	65.02	B	72.88	C	53.97	K70	房地产业	广东省	440000	深圳市	440300
000007	全新好	2017	2	3	CCC	68.6	CCC	65.92	BBB	84.99	C	53.97	K70	房地产业	广东省	440000	深圳市	440300
000007	全新好	2017	3	4	B	73.17	CCC	65.92	BBB	84.99	CC	64.38	K70	房地产业	广东省	440000	深圳市	440300
000007	全新好	2017	4	4	B	74.34	CCC	65.92	BBB	84.99	CCC	67.04	K70	房地产业	广东省	440000	深圳市	440300
000007	全新好	2018	1	5	BB	75.18	CCC	65.92	BBB	84.99	CCC	68.95	K70	房地产业	广东省	440000	深圳市	440300
000007	全新好	2018	2	3	CCC	67.97	CC	60.97	B	74.55	CC	64.06	K70	房地产业	广东省	440000	深圳市	440300
000007	全新好	2018	3	3	CCC	69.46	CC	60.97	B	74.55	CCC	67.45	K70	房地产业	广东省	440000	深圳市	440300
000007	全新好	2018	4	3	CCC	68.29	CC	60.97	B	74.55	CC	64.78	K70	房地产业	广东省	440000	深圳市	440300
000007	全新好	2019	1	3	CCC	66.17	CC	60.97	B	74.55	C	59.95	K70	房地产业	广东省	440000	深圳市	440300
000007	全新好	2019	2	2	CC	64.9	CC	62.54	B	74.55	C	56.55	K70	房地产业	广东省	440000	深圳市	440300
000007	全新好	2019	3	3	CCC	69.41	CC	60.97	B	74.55	CCC	67.33	K70	房地产业	广东省	440000	深圳市	440300
000007	全新好	2019	4	3	CCC	69.8	CC	60.97	B	74.55	CCC	68.22	K70	房地产业	广东省	440000	深圳市	440300
000007	全新好	2020	1	3	CCC	65.02	CC	60.97	B	74.55	C	57.34	K70	房地产业	广东省	440000	深圳市	440300
000007	全新好	2020	2	3	CCC	67.18	CC	60.74	BB	78.72	C	58.37	K70	房地产业	广东省	440000	深圳市	440300
000007	全新好	2020	3	3	CCC	69.24	CC	60.74	BB	78.72	CC	63.07	K70	房地产业	广东省	440000	深圳市	440300
000007	全新好	2020	4	3	CCC	66.13	CC	60.74	BB	78.72	C	56	K70	房地产业	广东省	440000	深圳市	440300
000007	*ST 全新	2021	1	3	CCC	66.52	CC	60.74	BB	78.72	C	56.88	K70	房地产业	广东省	440000	深圳市	440300
000007	*ST 全新	2021	2	2	CC	64.63	CCC	65.5	B	73.18	C	57.5	K70	房地产业	广东省	440000	深圳市	440300
000007	*ST 全新	2021	3	2	CC	64.63	CCC	65.5	B	73.18	C	57.5	K70	房地产业	广东省	440000	深圳市	440300
000007	*ST 全新	2021	4	2	CC	64.71	CCC	65.5	B	73.47	C	57.5	K70	房地产业	广东省	440000	深圳市	440300
000007	全新好	2022	1	2	CC	64.09	CCC	65.5	B	73.47	C	55.91	K70	房地产业	广东省	440000	深圳市	440300
000007	全新好	2022	2	3	CCC	65.06	CCC	65.5	B	72.73	C	58.96	K70	房地产业	广东省	440000	深圳市	440300
000007	全新好	2022	3	3	CCC	65.06	CCC	65.5	B	72.73	C	58.96	K70	房地产业	广东省	440000	深圳市	440300
000007	全新好	2022	4	3	CCC	65.61	CCC	65.5	B	72.44	CC	60.55	K70	房地产业	广东省	440000	深圳市	440300
000007	*ST 全新	2023	1	3	CCC	66.23	CCC	65.5	B	72.44	CC	62.13	K70	房地产业	广东省	440000	深圳市	440300
000007	*ST 全新	2023	2	3	CCC	68.02	CCC	65.5	B	73.3	CCC	66.01	K70	房地产业	广东省	440000	深圳市	440300
000007	*ST 全新	2023	3	3	CCC	68.02	CCC	65.5	B	73.3	CCC	66.01	K70	房地产业	广东省	440000	深圳市	440300
000007	*ST 全新	2023	4	3	CCC	67.16	CCC	65.5	B	73.3	CC	63.84	K70	房地产业	广东省	440000	深圳市	440300
000007	全新好	2024	1	3	CCC	67.64	CCC	66.79	B	73.3	CC	64.04	K70	房地产业	广东省	440000	深圳市	440300
000007	全新好	2024	2	1	C	55.41	CCC	66.14	B	74.42	CC	64.59	K70	房地产业	广东省	440000	深圳市	440300
000007	全新好	2024	3	1	C	55.95	CCC	66.79	B	74.42	CC	62.96	K70	房地产业	广东省	440000	深圳市	440300
000007	全新好	2024	4	1	C	51.76	CCC	66.14	B	74.42	CC	60.23	K70	房地产业	广东省	440000	深圳市	440300
000008	ST 宝利来	2009	1	4	B	70.87	C	57.47	C	55.75	A	87.91	I64	互联网和相关服务	广东省	440000	深圳市	440300
000008	ST 宝利来	2009	2	4	B	71.44	C	45.9	CCC	66.35	A	87.91	I64	互联网和相关服务	广东省	440000	深圳市	440300
000008	ST 宝利来	2009	3	4	B	72.35	C	45.9	CCC	66.35	A	89.9	I64	互联网和相关服务	广东省	440000	深圳市	440300
000008	ST 宝利来	2009	4	4	B	72.35	C	45.9	CCC	66.35	A	89.9	I64	互联网和相关服务	广东省	440000	深圳市	440300
000008	ST 宝利来	2010	1	4	B	72.35	C	45.9	CCC	66.35	A	89.9	F51	批发业	广东省	440000	深圳市	440300
000008	ST 宝利来	2010	2	4	B	71.87	C	45.9	CC	64.8	A	89.9	F51	批发业	广东省	440000	深圳市	440300
000008	ST 宝利来	2010	3	4	B	71.87	C	45.9	CC	64.8	A	89.9	F51	批发业	广东省	440000	深圳市	440300
000008	ST 宝利来	2010	4	4	B	71.87	C	45.9	CC	64.8	A	89.9	F51	批发业	广东省	440000	深圳市	440300
000008	ST 宝利来	2011	1	4	B	71.87	C	45.9	CC	64.8	A	89.9	F51	批发业	广东省	440000	深圳市	440300
000008	ST 宝利来	2011	2	3	CCC	68.59	C	48.93	CC	63.69	BBB	81.92	F51	批发业	广东省	440000	深圳市	440300
000008	ST 宝利来	2011	3	3	CCC	68.59	C	48.93	CC	63.69	BBB	81.92	F51	批发业	广东省	440000	深圳市	440300
000008	ST 宝利来	2011	4	3	CCC	69.5	C	48.93	CC	63.69	BBB	83.92	F51	批发业	广东省	440000	深圳市	440300
000008	ST 宝利来	2012	1	3	CCC	68	C	48.93	CC	63.69	BBB	80.64	H61	住宿业	广东省	440000	深圳市	440300
000008	ST 宝利来	2012	2	2	CC	63.96	C	47.7	C	57.74	BB	76.45	H61	住宿业	广东省	440000	深圳市	440300
000008	ST 宝利来	2012	3	2	CC	63.96	C	47.7	C	57.74	BB	76.45	H61	住宿业	广东省	440000	深圳市	440300
000008	ST 宝利来	2012	4	2	CC	63.96	C	47.7	C	57.74	BB	76.45	H61	住宿业	广东省	440000	深圳市	440300
000008	宝利来	2013	1	2	CC	64.71	C	47.7	C	57.74	BB	78.09	H61	住宿业	广东省	440000	深圳市	440300
000008	宝利来	2013	2	4	B	70.75	C	45.9	CC	64.8	A	87.45	H61	住宿业	广东省	440000	深圳市	440300
000008	宝利来	2013	3	3	CCC	69.84	C	45.9	CC	64.8	A	85.45	H61	住宿业	广东省	440000	深圳市	440300
000008	宝利来	2013	4	3	CCC	68.17	C	45.9	CC	64.8	BBB	81.82	H61	住宿业	广东省	440000	深圳市	440300
000008	宝利来	2014	1	3	CCC	68.17	C	45.9	CC	64.8	BBB	81.82	H61	住宿业	广东省	440000	深圳市	440300
000008	宝利来	2014	2	3	CCC	67.28	C	47.48	C	57.74	BBB	83.81	H61	住宿业	广东省	440000	深圳市	440300
000008	宝利来	2014	3	3	CCC	67.28	C	47.48	C	57.74	BBB	83.81	H61	住宿业	广东省	440000	深圳市	440300
000008	宝利来	2014	4	3	CCC	66.36	C	47.48	C	57.74	BBB	81.82	H61	住宿业	广东省	440000	深圳市	440300
000008	神州高铁	2015	1	3	CCC	68.24	C	47.48	C	57.74	A	85.91	C37	铁路、船舶、航空航天和其它运输设备制造业	北京市	110000	北京市	110000
000008	神州高铁	2015	2	3	CCC	67.31	C	45.9	CC	60.78	BBB	82.64	C37	铁路、船舶、航空航天和其它运输设备制造业	北京市	110000	北京市	110000
000008	神州高铁	2015	3	3	CCC	67.31	C	45.9	CC	60.78	BBB	82.64	C37	铁路、船舶、航空航天和其它运输设备制造业	北京市	110000	北京市	110000
000008	神州高铁	2015	4	3	CCC	65.54	C	45.9	C	59.92	BB	79.36	C37	铁路、船舶、航空航天和其它运输设备制造业	北京市	110000	北京市	110000
000008	神州高铁	2016	1	3	CCC	66.29	C	45.9	C	59.92	BBB	81	C37	铁路、船舶、航空航天和其它运输设备制造业	北京市	110000	北京市	110000
000008	神州高铁	2016	2	4	B	71.75	C	49.49	BB	76.11	BBB	80.18	C37	铁路、船舶、航空航天和其它运输设备制造业	北京市	110000	北京市	110000
000008	神州高铁	2016	3	4	B	71.75	C	49.49	BB	76.11	BBB	80.18	C37	铁路、船舶、航空航天和其它运输设备制造业	北京市	110000	北京市	110000
000008	神州高铁	2016	4	4	B	71.75	C	49.49	BB	76.11	BBB	80.18	C37	铁路、船舶、航空航天和其它运输设备制造业	北京市	110000	北京市	110000
000008	神州高铁	2017	1	4	B	72.13	C	49.49	BB	76.11	BBB	81	C37	铁路、船舶、航空航天和其它运输设备制造业	北京市	110000	北京市	110000
000008	神州高铁	2017	2	4	B	70.52	C	54.24	CC	64.35	BBB	82.99	C37	铁路、船舶、航空航天和其它运输设备制造业	北京市	110000	北京市	110000
000008	神州高铁	2017	3	4	B	70.52	C	54.24	CC	64.35	BBB	82.99	C37	铁路、船舶、航空航天和其它运输设备制造业	北京市	110000	北京市	110000
000008	神州高铁	2017	4	4	B	70.15	C	54.24	CC	64.35	BBB	82.17	C37	铁路、船舶、航空航天和其它运输设备制造业	北京市	110000	北京市	110000
000008	神州高铁	2018	1	3	CCC	68.86	C	54.24	CC	64.35	BB	79.36	C37	铁路、船舶、航空航天和其它运输设备制造业	北京市	110000	北京市	110000
000008	神州高铁	2018	2	4	B	72.86	C	54.24	BB	76.11	BBB	80.18	C37	铁路、船舶、航空航天和其它运输设备制造业	北京市	110000	北京市	110000
000008	神州高铁	2018	3	4	B	70.86	C	54.24	BB	76.11	BB	75.81	C37	铁路、船舶、航空航天和其它运输设备制造业	北京市	110000	北京市	110000
000008	神州高铁	2018	4	4	B	71.78	C	54.24	BB	76.11	BB	77.81	C37	铁路、船舶、航空航天和其它运输设备制造业	北京市	110000	北京市	110000
000008	神州高铁	2019	1	4	B	71.24	C	54.24	BB	76.11	BB	76.63	C37	铁路、船舶、航空航天和其它运输设备制造业	北京市	110000	北京市	110000
000008	神州高铁	2019	2	3	CCC	66.07	C	58.86	B	72.9	CCC	65.14	C37	铁路、船舶、航空航天和其它运输设备制造业	北京市	110000	北京市	110000
000008	神州高铁	2019	3	4	B	72.33	C	58.86	B	72.9	BB	78.81	C37	铁路、船舶、航空航天和其它运输设备制造业	北京市	110000	北京市	110000
000008	神州高铁	2019	4	4	B	72.59	C	58.86	B	73.76	BB	78.81	C37	铁路、船舶、航空航天和其它运输设备制造业	北京市	110000	北京市	110000
000008	神州高铁	2020	1	4	B	72.97	C	58.86	B	73.76	BB	79.63	C37	铁路、船舶、航空航天和其它运输设备制造业	北京市	110000	北京市	110000
000008	神州高铁	2020	2	4	B	70.11	C	54.46	CCC	69.05	BB	78.81	C37	铁路、船舶、航空航天和其它运输设备制造业	北京市	110000	北京市	110000
000008	神州高铁	2020	3	4	B	70.11	C	54.46	CCC	69.05	BB	78.81	C37	铁路、船舶、航空航天和其它运输设备制造业	北京市	110000	北京市	110000
000008	神州高铁	2020	4	4	B	70.38	C	52.67	B	72.5	BB	78	C37	铁路、船舶、航空航天和其它运输设备制造业	北京市	110000	北京市	110000
000008	神州高铁	2021	1	4	B	70.38	C	52.67	B	72.5	BB	78	C37	铁路、船舶、航空航天和其它运输设备制造业	北京市	110000	北京市	110000
000008	神州高铁	2021	2	5	BB	75.54	CCC	67.14	BB	76.67	BB	79.89	C37	铁路、船舶、航空航天和其它运输设备制造业	北京市	110000	北京市	110000
000008	神州高铁	2021	3	5	BB	75.54	CCC	67.14	BB	76.67	BB	79.89	C37	铁路、船舶、航空航天和其它运输设备制造业	北京市	110000	北京市	110000
000008	神州高铁	2021	4	5	BB	76.11	CCC	67.14	BB	76.67	BBB	81.25	C37	铁路、船舶、航空航天和其它运输设备制造业	北京市	110000	北京市	110000
000008	神州高铁	2022	1	5	BB	76.29	CCC	67.14	BB	76.38	BBB	81.89	C37	铁路、船舶、航空航天和其它运输设备制造业	北京市	110000	北京市	110000
000008	神州高铁	2022	2	4	B	73.23	CCC	67.28	BB	75.4	BB	75.27	C37	铁路、船舶、航空航天和其它运输设备制造业	北京市	110000	北京市	110000
000008	神州高铁	2022	3	4	B	73.23	CCC	67.28	BB	75.4	BB	75.27	C37	铁路、船舶、航空航天和其它运输设备制造业	北京市	110000	北京市	110000
000008	神州高铁	2022	4	4	B	72.78	CCC	67.28	BB	75.4	B	74.22	C37	铁路、船舶、航空航天和其它运输设备制造业	北京市	110000	北京市	110000
000008	神州高铁	2023	1	4	B	72.69	CCC	67.27	BB	75.11	B	74.22	C37	铁路、船舶、航空航天和其它运输设备制造业	北京市	110000	北京市	110000
000008	神州高铁	2023	2	4	B	73.64	CCC	68.09	BB	76.38	BB	75.01	C37	铁路、船舶、航空航天和其它运输设备制造业	北京市	110000	北京市	110000
000008	神州高铁	2023	3	4	B	74.8	C	58.05	BB	78.56	BB	76.92	C37	铁路、船舶、航空航天和其它运输设备制造业	北京市	110000	北京市	110000
000008	神州高铁	2023	4	5	BB	79.43	BB	75.11	BBB	80.2	BBB	81.52	C37	铁路、船舶、航空航天和其它运输设备制造业	北京市	110000	北京市	110000
000008	神州高铁	2024	1	5	BB	78.61	BB	77.74	BB	78.2	BB	79.46	C37	铁路、船舶、航空航天和其它运输设备制造业	北京市	110000	北京市	110000
000008	神州高铁	2024	2	4	B	74.14	BB	76.81	BBB	82.23	BB	79.29	C37	铁路、船舶、航空航天和其它运输设备制造业	北京市	110000	北京市	110000
000008	神州高铁	2024	3	5	BB	76.75	BBB	80.15	BBB	83.76	BB	78.87	C37	铁路、船舶、航空航天和其它运输设备制造业	北京市	110000	北京市	110000
000008	神州高铁	2024	4	5	BB	78.54	BBB	80.71	BBB	82.23	BB	79.72	C37	铁路、船舶、航空航天和其它运输设备制造业	北京市	110000	北京市	110000
000009	中国宝安	2009	1	4	B	74.57	CC	64	B	70.37	BBB	82.2	S90	综合	广东省	440000	深圳市	440300
000009	中国宝安	2009	2	5	BB	78.94	CC	60.58	BBB	80.99	A	86.11	S90	综合	广东省	440000	深圳市	440300
000009	中国宝安	2009	3	5	BB	78.56	CC	60.58	BBB	80.99	A	85.31	S90	综合	广东省	440000	深圳市	440300
000009	中国宝安	2009	4	5	BB	78.94	CC	60.58	BBB	80.99	A	86.11	S90	综合	广东省	440000	深圳市	440300
000009	中国宝安	2010	1	5	BB	79.32	CC	60.58	BBB	80.99	A	86.92	S90	综合	广东省	440000	深圳市	440300
000009	中国宝安	2010	2	4	B	74.35	C	55.27	BB	76.98	BBB	81.47	S90	综合	广东省	440000	深圳市	440300
000009	中国宝安	2010	3	4	B	74.35	C	55.27	BB	76.98	BBB	81.47	S90	综合	广东省	440000	深圳市	440300
000009	中国宝安	2010	4	4	B	74.27	C	55.27	BB	76.98	BBB	81.31	S90	综合	广东省	440000	深圳市	440300
000009	中国宝安	2011	1	4	B	74.27	C	55.27	BB	76.98	BBB	81.31	S90	综合	广东省	440000	深圳市	440300
000009	中国宝安	2011	2	5	BB	78.86	CC	62.29	BBB	82.21	BBB	84.34	S90	综合	广东省	440000	深圳市	440300
000009	中国宝安	2011	3	3	CCC	68.74	CC	62.29	BBB	82.21	CC	62.94	S90	综合	广东省	440000	深圳市	440300
000009	中国宝安	2011	4	3	CCC	69.12	CC	62.29	BBB	82.21	CC	63.75	S90	综合	广东省	440000	深圳市	440300
000009	中国宝安	2012	1	3	CCC	69.5	CC	62.29	BBB	82.21	CC	64.56	S90	综合	广东省	440000	深圳市	440300
000009	中国宝安	2012	2	3	CCC	65.44	CC	60.58	BB	76.25	CC	60.64	S90	综合	广东省	440000	深圳市	440300
000009	中国宝安	2012	3	4	B	70.38	CC	60.58	BB	76.25	B	71.09	S90	综合	广东省	440000	深圳市	440300
000009	中国宝安	2012	4	3	CCC	68.1	CC	60.58	BB	76.25	CCC	66.27	S90	综合	广东省	440000	深圳市	440300
000009	中国宝安	2013	1	3	CCC	68.48	CC	60.58	BB	76.25	CCC	67.08	S90	综合	广东省	440000	深圳市	440300
000009	中国宝安	2013	2	4	B	70.62	CCC	65.39	BB	79.29	CCC	67.39	S90	综合	广东省	440000	深圳市	440300
000009	中国宝安	2013	3	4	B	71.76	CCC	65.39	BB	75.95	B	71.98	S90	综合	广东省	440000	深圳市	440300
000009	中国宝安	2013	4	4	B	72.14	CCC	65.39	BB	75.95	B	72.78	S90	综合	广东省	440000	深圳市	440300
000009	中国宝安	2014	1	4	B	72.14	CCC	65.39	BB	75.95	B	72.78	S90	综合	广东省	440000	深圳市	440300
000009	中国宝安	2014	2	4	B	70.47	C	52.5	BBB	80.32	B	72.37	S90	综合	广东省	440000	深圳市	440300
000009	中国宝安	2014	3	4	B	72.52	C	52.5	BB	76.98	BB	78.89	S90	综合	广东省	440000	深圳市	440300
000009	中国宝安	2014	4	4	B	72.9	C	52.5	BB	76.98	BB	79.7	S90	综合	广东省	440000	深圳市	440300
000009	中国宝安	2015	1	4	B	72.9	C	52.5	BB	76.98	BB	79.7	S90	综合	广东省	440000	深圳市	440300
000009	中国宝安	2015	2	5	BB	78.62	CC	64.69	BBB	81.54	BBB	83.16	S90	综合	广东省	440000	深圳市	440300
000009	中国宝安	2015	3	5	BB	77.59	CC	64.69	BB	78.2	BBB	83.16	S90	综合	广东省	440000	深圳市	440300
000009	中国宝安	2015	4	5	BB	77.59	CC	64.69	BB	78.2	BBB	83.16	S90	综合	广东省	440000	深圳市	440300
000009	中国宝安	2016	1	5	BB	77.97	CC	64.69	BB	78.2	BBB	83.97	S90	综合	广东省	440000	深圳市	440300
000009	中国宝安	2016	2	5	BB	78.24	C	59.52	BBB	84	BBB	83.16	S90	综合	广东省	440000	深圳市	440300
000009	中国宝安	2016	3	5	BB	76.3	C	59.52	BBB	80.67	BBB	81.23	S90	综合	广东省	440000	深圳市	440300
000009	中国宝安	2016	4	5	BB	75.92	C	59.52	BBB	80.67	BBB	80.42	S90	综合	广东省	440000	深圳市	440300
000009	中国宝安	2017	1	5	BB	75.92	C	59.52	BBB	80.67	BBB	80.42	S90	综合	广东省	440000	深圳市	440300
000009	中国宝安	2017	2	5	BB	78.01	B	70.55	BBB	80.86	BB	79.62	S90	综合	广东省	440000	深圳市	440300
000009	中国宝安	2017	3	5	BB	78.01	B	70.55	BBB	80.86	BB	79.62	S90	综合	广东省	440000	深圳市	440300
000009	中国宝安	2017	4	5	BB	78.01	B	70.55	BBB	80.86	BB	79.62	S90	综合	广东省	440000	深圳市	440300
000009	中国宝安	2018	1	5	BB	78.39	B	70.55	BBB	80.86	BBB	80.42	S90	综合	广东省	440000	深圳市	440300
000009	中国宝安	2018	2	5	BB	75.1	C	57.99	BBB	81.44	BB	78.89	S90	综合	广东省	440000	深圳市	440300
000009	中国宝安	2018	3	4	B	74.08	C	57.99	BBB	81.44	BB	76.73	S90	综合	广东省	440000	深圳市	440300
000009	中国宝安	2018	4	4	B	74.46	C	57.99	BBB	81.44	BB	77.54	S90	综合	广东省	440000	深圳市	440300
000009	中国宝安	2019	1	4	B	74.5	C	57.99	BBB	80.32	BB	78.35	S90	综合	广东省	440000	深圳市	440300
000009	中国宝安	2019	2	5	BB	78.99	CCC	68.47	A	89.1	BB	77.28	S90	综合	广东省	440000	深圳市	440300
000009	中国宝安	2019	3	5	BB	78.34	CCC	67.08	A	87.98	BB	77.28	S90	综合	广东省	440000	深圳市	440300
000009	中国宝安	2019	4	5	BB	78.34	CCC	67.08	A	87.98	BB	77.28	S90	综合	广东省	440000	深圳市	440300
000009	中国宝安	2020	1	5	BB	77.33	CCC	67.08	A	87.98	BB	75.12	S90	综合	广东省	440000	深圳市	440300
000009	中国宝安	2020	2	4	B	73.72	CC	63.29	BB	79.36	B	74.87	S90	综合	广东省	440000	深圳市	440300
000009	中国宝安	2020	3	4	B	74.74	CC	63.29	BB	79.36	BB	77.03	S90	综合	广东省	440000	深圳市	440300
000009	中国宝安	2020	4	4	B	74.62	CC	61.58	BBB	80.2	BB	77.03	S90	综合	广东省	440000	深圳市	440300
000009	中国宝安	2021	1	5	BB	75.38	CC	63.29	BBB	80.2	BB	77.84	S90	综合	广东省	440000	深圳市	440300
000009	中国宝安	2021	2	4	B	71.42	C	59.53	BB	76.18	BB	77.22	S90	综合	广东省	440000	深圳市	440300
000009	中国宝安	2021	3	4	B	72.11	C	59.53	BB	76.18	BB	78.81	S90	综合	广东省	440000	深圳市	440300
000009	中国宝安	2021	4	4	B	71.64	C	59.53	BB	75.8	BB	77.94	S90	综合	广东省	440000	深圳市	440300
000009	中国宝安	2022	1	4	B	71.08	C	59.53	BB	75.8	BB	76.67	S90	综合	广东省	440000	深圳市	440300
000009	中国宝安	2022	2	4	B	73.47	CCC	66.49	BB	75.72	BB	77.18	S90	综合	广东省	440000	深圳市	440300
000009	中国宝安	2022	3	4	B	73.47	CCC	66.49	BB	75.72	BB	77.18	S90	综合	广东省	440000	深圳市	440300
000009	中国宝安	2022	4	4	B	73.4	CCC	66.49	BB	75.34	BB	77.25	S90	综合	广东省	440000	深圳市	440300
000009	中国宝安	2023	1	4	B	74.1	CCC	66.49	BB	75.34	BB	78.84	S90	综合	广东省	440000	深圳市	440300
000009	中国宝安	2023	2	5	BB	75.71	B	70.52	BB	76.1	BB	79.2	S90	综合	广东省	440000	深圳市	440300
000009	中国宝安	2023	3	5	BB	75.25	B	70.52	BB	76.1	BB	78.14	S90	综合	广东省	440000	深圳市	440300
000009	中国宝安	2023	4	5	BB	75.77	B	70.52	BB	76.48	BB	79.13	S90	综合	广东省	440000	深圳市	440300
000009	中国宝安	2024	1	5	BB	75.33	CCC	69.95	BB	75.21	BB	79.25	S90	综合	广东省	440000	深圳市	440300
000009	中国宝安	2024	2	1	C	56.3	C	58.48	BB	75.95	BB	78.77	S90	综合	广东省	440000	深圳市	440300
000009	中国宝安	2024	3	1	C	50.61	C	58.61	BB	78.7	CCC	69.98	S90	综合	广东省	440000	深圳市	440300
000009	中国宝安	2024	4	1	C	53.91	C	58.61	BB	76.41	B	71.74	S90	综合	广东省	440000	深圳市	440300
000010	SST 华新	2009	1	1	C	59.88	C	52.72	C	52.19	CCC	68.62	F52	零售业	广东省	440000	深圳市	440300
000010	SST 华新	2009	2	2	CC	63.09	C	44.88	CC	61.35	B	73.26	F52	零售业	广东省	440000	深圳市	440300
000010	SST 华新	2009	3	2	CC	63.09	C	44.88	CC	61.35	B	73.26	F52	零售业	广东省	440000	深圳市	440300
000010	SST 华新	2009	4	2	CC	62.71	C	44.88	CC	60.13	B	73.26	F52	零售业	广东省	440000	深圳市	440300
000010	SST 华新	2010	1	2	CC	62.71	C	44.88	CC	60.13	B	73.26	C35	专用设备制造业	广东省	440000	北京市	110000
000010	SST 华新	2010	2	2	CC	60.22	C	44.88	C	55.1	B	71.27	C35	专用设备制造业	广东省	440000	北京市	110000
000010	SST 华新	2010	3	2	CC	60.22	C	44.88	C	55.1	B	71.27	C35	专用设备制造业	广东省	440000	北京市	110000
000010	SST 华新	2010	4	2	CC	60.22	C	44.88	C	55.1	B	71.27	C35	专用设备制造业	广东省	440000	北京市	110000
000010	SST 华新	2011	1	2	CC	60.22	C	44.88	C	55.1	B	71.27	C35	专用设备制造业	北京市	110000	北京市	110000
000010	SST 华新	2011	2	2	CC	60.49	C	47.68	C	55.1	B	70.48	C35	专用设备制造业	北京市	110000	北京市	110000
000010	SST 华新	2011	3	2	CC	60.86	C	47.68	C	55.1	B	71.27	C35	专用设备制造业	北京市	110000	北京市	110000
000010	SST 华新	2011	4	2	CC	60.49	C	47.68	C	55.1	B	70.48	C35	专用设备制造业	北京市	110000	北京市	110000
000010	SST 华新	2012	1	2	CC	60.49	C	47.68	C	55.1	B	70.48	C35	专用设备制造业	北京市	110000	北京市	110000
000010	SST 华新	2012	2	3	CCC	65.17	C	49.08	C	59.46	BB	76.97	C35	专用设备制造业	北京市	110000	北京市	110000
000010	SST 华新	2012	3	3	CCC	65.15	C	49.08	C	57.95	BB	77.96	C35	专用设备制造业	北京市	110000	北京市	110000
000010	SST 华新	2012	4	2	CC	62.16	C	49.08	C	57.95	B	71.47	C35	专用设备制造业	北京市	110000	北京市	110000
000010	深华新	2013	1	2	CC	61.06	C	49.08	C	57.95	CCC	69.09	C35	专用设备制造业	北京市	110000	北京市	110000
000010	深华新	2013	2	2	CC	63.42	C	50.95	C	59.44	B	72.27	C35	专用设备制造业	北京市	110000	北京市	110000
000010	深华新	2013	3	2	CC	63.33	C	50.95	C	59.44	B	72.07	C35	专用设备制造业	北京市	110000	北京市	110000
000010	深华新	2013	4	2	CC	64.95	C	50.95	C	59.44	BB	75.6	C35	专用设备制造业	北京市	110000	北京市	110000
000010	深华新	2014	1	2	CC	64.59	C	50.95	C	59.44	B	74.81	C35	专用设备制造业	北京市	110000	北京市	110000
000010	深华新	2014	2	3	CCC	66.78	C	53.99	C	57.95	BB	79.07	C35	专用设备制造业	北京市	110000	北京市	110000
000010	深华新	2014	3	3	CCC	66.96	C	53.99	C	57.95	BB	79.47	C35	专用设备制造业	北京市	110000	北京市	110000
000010	深华新	2014	4	3	CCC	66.86	C	53.99	C	57.95	BB	79.25	C35	专用设备制造业	北京市	110000	北京市	110000
000010	深华新	2015	1	3	CCC	66.86	C	53.99	C	57.95	BB	79.25	E48	土木工程建筑业	北京市	110000	北京市	110000
000010	深华新	2015	2	2	CC	63.86	C	50.95	C	50.68	BB	79.15	E48	土木工程建筑业	北京市	110000	北京市	110000
000010	深华新	2015	3	2	CC	63.86	C	50.95	C	50.68	BB	79.15	E48	土木工程建筑业	北京市	110000	北京市	110000
000010	深华新	2015	4	2	CC	60.66	C	50.95	C	50.68	B	72.22	E48	土木工程建筑业	北京市	110000	北京市	110000
000010	美丽生态	2016	1	1	C	55.28	C	50.95	C	50.68	CC	60.53	E48	土木工程建筑业	广东省	440000	深圳市	440300
000010	美丽生态	2016	2	2	CC	60.79	C	52.59	C	57.95	CCC	66.77	E48	土木工程建筑业	广东省	440000	深圳市	440300
000010	美丽生态	2016	3	2	CC	60.43	C	52.59	C	57.95	CCC	65.97	E48	土木工程建筑业	广东省	440000	深圳市	440300
000010	美丽生态	2016	4	2	CC	60.43	C	52.59	C	57.95	CCC	65.97	E48	土木工程建筑业	广东省	440000	深圳市	440300
000010	美丽生态	2017	1	2	CC	62.22	C	52.59	C	57.95	CCC	69.86	E48	土木工程建筑业	广东省	440000	深圳市	440300
000010	美丽生态	2017	2	2	CC	60.94	C	49.93	C	59.92	CCC	67.08	E48	土木工程建筑业	广东省	440000	深圳市	440300
000010	美丽生态	2017	3	1	C	56.75	C	49.93	C	59.92	C	57.98	E48	土木工程建筑业	广东省	440000	深圳市	440300
000010	美丽生态	2017	4	1	C	55.29	C	49.93	C	59.92	C	54.8	E48	土木工程建筑业	广东省	440000	深圳市	440300
000010	美丽生态	2018	1	1	C	55.65	C	49.93	C	59.92	C	55.6	E48	土木工程建筑业	广东省	440000	深圳市	440300
000010	美丽生态	2018	2	1	C	56.45	C	51.57	CC	63.33	C	54.2	E48	土木工程建筑业	广东省	440000	深圳市	440300
000010	美丽生态	2018	3	2	CC	60.14	C	51.57	CC	63.33	CC	62.21	E48	土木工程建筑业	广东省	440000	深圳市	440300
000010	美丽生态	2018	4	2	CC	60.9	C	51.57	CCC	65.77	CC	62.21	E48	土木工程建筑业	广东省	440000	深圳市	440300
000010	*ST 美丽	2019	1	1	C	58.42	C	51.57	CCC	65.77	C	56.83	E48	土木工程建筑业	广东省	440000	深圳市	440300
000010	*ST 美丽	2019	2	1	C	57.3	C	54.5	CCC	67.99	C	51.44	E48	土木工程建筑业	广东省	440000	深圳市	440300
000010	*ST 美丽	2019	3	1	C	59.25	C	54.5	CCC	67.99	C	55.68	E48	土木工程建筑业	广东省	440000	深圳市	440300
000010	*ST 美丽	2019	4	1	C	55.78	C	54.5	CCC	66.77	C	48.97	E48	土木工程建筑业	广东省	440000	深圳市	440300
000010	美丽生态	2020	1	1	C	55.1	C	53.1	CCC	66.77	C	48.18	E48	土木工程建筑业	广东省	440000	深圳市	440300
000010	美丽生态	2020	2	1	C	53.03	C	52.65	CC	63.15	C	46.37	E48	土木工程建筑业	广东省	440000	深圳市	440300
000010	美丽生态	2020	3	1	C	54.47	C	54.29	CC	63.15	C	48.69	E48	土木工程建筑业	广东省	440000	深圳市	440300
000010	美丽生态	2020	4	1	C	50.76	C	52.65	CC	63.15	C	41.45	E48	土木工程建筑业	广东省	440000	深圳市	440300
000010	美丽生态	2021	1	1	C	49.79	C	52.65	CC	63.15	C	39.33	E48	土木工程建筑业	广东省	440000	深圳市	440300
000010	美丽生态	2021	2	2	CC	64.25	CC	60.03	BB	75.34	C	59.88	E48	土木工程建筑业	广东省	440000	深圳市	440300
000010	美丽生态	2021	3	2	CC	63.37	CC	60.03	BB	75.34	C	57.65	E48	土木工程建筑业	广东省	440000	深圳市	440300
000010	美丽生态	2021	4	2	CC	64.97	CC	60.03	BB	75.34	CC	61.7	E48	土木工程建筑业	广东省	440000	深圳市	440300
000010	美丽生态	2022	1	2	CC	64.97	CC	60.03	BB	75.34	CC	61.7	E48	土木工程建筑业	广东省	440000	深圳市	440300
000010	美丽生态	2022	2	3	CCC	65.28	CC	60.03	BB	76.27	CC	61.83	E48	土木工程建筑业	广东省	440000	深圳市	440300
000010	美丽生态	2022	3	3	CCC	65.76	CC	60.03	BB	76.27	CC	63.06	E48	土木工程建筑业	广东省	440000	深圳市	440300
000010	美丽生态	2022	4	3	CCC	68.75	CC	60.03	BB	76.27	B	70.64	E48	土木工程建筑业	广东省	440000	深圳市	440300
000010	美丽生态	2023	1	3	CCC	68.75	CC	60.04	BB	76.27	B	70.64	E48	土木工程建筑业	广东省	440000	深圳市	440300
000010	美丽生态	2023	2	2	CC	62.57	CC	60.04	B	73.38	C	57.03	E48	土木工程建筑业	广东省	440000	深圳市	440300
000010	美丽生态	2023	3	2	CC	62.57	CC	60.04	B	73.38	C	57.03	E48	土木工程建筑业	广东省	440000	深圳市	440300
000010	美丽生态	2023	4	2	CC	62.41	CC	60.03	B	74.3	C	55.97	E48	土木工程建筑业	广东省	440000	深圳市	440300
000010	美丽生态	2024	1	2	CC	64.15	CCC	66.44	B	74.3	C	55.1	E48	土木工程建筑业	广东省	440000	深圳市	440300
000010	美丽生态	2024	2	1	C	54.12	CCC	65.04	B	73.29	C	59.4	E48	土木工程建筑业	广东省	440000	深圳市	440300
000010	美丽生态	2024	3	1	C	50	CCC	65.04	B	73.95	C	54.23	E48	土木工程建筑业	广东省	440000	深圳市	440300
000010	美丽生态	2024	4	1	C	50.86	CC	64.42	B	72.96	C	57.35	E48	土木工程建筑业	广东省	440000	深圳市	440300
000011	深物业A	2009	1	5	BB	75.71	C	54.67	BBB	83.32	BB	75.44	S90	综合	广东省	440000	深圳市	440300
000011	深物业A	2009	2	4	B	74.07	C	56.24	BB	76.8	BB	77.35	S90	综合	广东省	440000	深圳市	440300
000011	深物业A	2009	3	4	B	74.85	C	56.24	BB	76.8	BB	79.13	S90	综合	广东省	440000	深圳市	440300
000011	深物业A	2009	4	4	B	74.07	C	56.24	BB	76.8	BB	77.35	S90	综合	广东省	440000	深圳市	440300
000011	深物业A	2010	1	4	B	71.5	C	56.24	BB	76.8	B	71.51	K70	房地产业	广东省	440000	深圳市	440300
000011	深物业A	2010	2	4	B	72.01	C	53.09	BB	78.06	B	72.53	K70	房地产业	广东省	440000	深圳市	440300
000011	深物业A	2010	3	3	CCC	68.66	C	53.09	BB	78.06	CC	64.91	K70	房地产业	广东省	440000	深圳市	440300
000011	深物业A	2010	4	3	CCC	69.11	C	53.09	BB	77.64	CCC	66.31	K70	房地产业	广东省	440000	深圳市	440300
000011	深物业A	2011	1	4	B	70.78	C	53.09	BB	77.64	B	70.12	K70	房地产业	广东省	440000	深圳市	440300
000011	深物业A	2011	2	4	B	71.15	C	56.24	BB	79.31	CCC	68.34	K70	房地产业	广东省	440000	深圳市	440300
000011	深物业A	2011	3	4	B	72.6	C	56.24	BB	79.31	B	71.64	K70	房地产业	广东省	440000	深圳市	440300
000011	深物业A	2011	4	4	B	72.6	C	56.24	BB	79.31	B	71.64	K70	房地产业	广东省	440000	深圳市	440300
000011	深物业A	2012	1	4	B	73.44	C	56.24	BB	79.31	B	73.54	K70	房地产业	广东省	440000	深圳市	440300
000011	深物业A	2012	2	4	B	71.3	C	54.67	B	74.71	B	73.54	K70	房地产业	广东省	440000	深圳市	440300
000011	深物业A	2012	3	4	B	72.14	C	54.67	B	74.71	BB	75.45	K70	房地产业	广东省	440000	深圳市	440300
000011	深物业A	2012	4	4	B	72.14	C	54.67	B	74.71	BB	75.45	K70	房地产业	广东省	440000	深圳市	440300
000011	深物业A	2013	1	4	B	72.97	C	54.67	B	74.71	BB	77.35	K70	房地产业	广东省	440000	深圳市	440300
000011	深物业A	2013	2	4	B	74	C	53.09	BB	76.8	BB	78.24	K70	房地产业	广东省	440000	深圳市	440300
000011	深物业A	2013	3	5	BB	75.23	C	53.09	BB	76.8	BBB	81.04	K70	房地产业	广东省	440000	深圳市	440300
000011	深物业A	2013	4	5	BB	75.23	C	53.09	BB	76.8	BBB	81.04	K70	房地产业	广东省	440000	深圳市	440300
000011	深物业A	2014	1	5	BB	75.23	C	53.09	BB	76.8	BBB	81.04	K70	房地产业	广东省	440000	深圳市	440300
000011	深物业A	2014	2	5	BB	77.52	C	56.91	BBB	80.98	BBB	81.04	K70	房地产业	广东省	440000	深圳市	440300
000011	深物业A	2014	3	5	BB	77.52	C	56.91	BBB	80.98	BBB	81.04	K70	房地产业	广东省	440000	深圳市	440300
000011	深物业A	2014	4	5	BB	77.52	C	56.91	BBB	80.98	BBB	81.04	K70	房地产业	广东省	440000	深圳市	440300
000011	深物业A	2015	1	5	BB	77.52	C	56.91	BBB	80.98	BBB	81.04	K70	房地产业	广东省	440000	深圳市	440300
000011	深物业A	2015	2	5	BB	77.35	CCC	65.02	BB	76.8	BBB	81.93	K70	房地产业	广东省	440000	深圳市	440300
000011	深物业A	2015	3	5	BB	77.35	CCC	65.02	BB	76.8	BBB	81.93	K70	房地产业	广东省	440000	深圳市	440300
000011	深物业A	2015	4	5	BB	76.96	CCC	65.02	BB	76.8	BBB	81.04	K70	房地产业	广东省	440000	深圳市	440300
000011	深物业A	2016	1	5	BB	76.57	CCC	65.02	BB	76.8	BBB	80.15	K70	房地产业	广东省	440000	深圳市	440300
000011	深物业A	2016	2	4	B	73.64	CC	60.06	B	70.54	BBB	81.04	K70	房地产业	广东省	440000	深圳市	440300
000011	深物业A	2016	3	4	B	73.24	CC	60.06	B	70.54	BBB	80.15	K70	房地产业	广东省	440000	深圳市	440300
000011	深物业A	2016	4	4	B	73.24	CC	60.06	B	70.54	BBB	80.15	K70	房地产业	广东省	440000	深圳市	440300
000011	深物业A	2017	1	4	B	73.24	CC	60.06	B	70.54	BBB	80.15	K70	房地产业	广东省	440000	深圳市	440300
000011	深物业A	2017	2	5	BB	76.7	CC	60.97	BB	77.05	BBB	81.55	K70	房地产业	广东省	440000	深圳市	440300
000011	深物业A	2017	3	5	BB	76.7	CC	60.97	BB	77.05	BBB	81.55	K70	房地产业	广东省	440000	深圳市	440300
000011	深物业A	2017	4	5	BB	76.7	CC	60.97	BB	77.05	BBB	81.55	K70	房地产业	广东省	440000	深圳市	440300
000011	深物业A	2018	1	5	BB	77.09	CC	60.97	BB	77.05	BBB	82.44	K70	房地产业	广东省	440000	深圳市	440300
000011	深物业A	2018	2	5	BB	79.63	C	57.81	BBB	83.32	BBB	83.33	K70	房地产业	广东省	440000	深圳市	440300
000011	深物业A	2018	3	5	BB	78.36	C	57.81	BBB	83.32	BBB	80.45	K70	房地产业	广东省	440000	深圳市	440300
000011	深物业A	2018	4	5	BB	78.36	C	57.81	BBB	83.32	BBB	80.45	K70	房地产业	广东省	440000	深圳市	440300
000011	深物业A	2019	1	5	BB	78.36	C	57.81	BBB	83.32	BBB	80.45	K70	房地产业	广东省	440000	深圳市	440300
000011	深物业A	2019	2	5	BB	77.17	C	55.57	BBB	81.23	BBB	80.45	K70	房地产业	广东省	440000	深圳市	440300
000011	深物业A	2019	3	5	BB	77.56	C	55.57	BBB	81.23	BBB	81.33	K70	房地产业	广东省	440000	深圳市	440300
000011	深物业A	2019	4	4	B	73.32	C	55.57	BBB	81.23	B	71.68	K70	房地产业	广东省	440000	深圳市	440300
000011	深物业A	2020	1	4	B	73.32	C	55.57	BBB	81.23	B	71.68	K70	房地产业	广东省	440000	深圳市	440300
000011	深物业A	2020	2	5	BB	76.07	C	57.14	A	85.82	B	73.07	K70	房地产业	广东省	440000	深圳市	440300
000011	深物业A	2020	3	5	BB	76.46	C	57.14	A	85.82	B	73.96	K70	房地产业	广东省	440000	深圳市	440300
000011	深物业A	2020	4	5	BB	76.46	C	57.14	A	85.82	B	73.96	K70	房地产业	广东省	440000	深圳市	440300
000011	深物业A	2021	1	5	BB	76.07	C	57.14	A	85.82	B	73.07	K70	房地产业	广东省	440000	深圳市	440300
000011	深物业A	2021	2	4	B	73.13	CCC	65.5	B	74.85	BB	77.82	K70	房地产业	广东省	440000	深圳市	440300
000011	深物业A	2021	3	4	B	73.13	CCC	65.5	B	74.85	BB	77.82	K70	房地产业	广东省	440000	深圳市	440300
000011	深物业A	2021	4	4	B	73.13	CCC	65.5	B	74.85	BB	77.82	K70	房地产业	广东省	440000	深圳市	440300
000011	深物业A	2022	1	4	B	73.76	CCC	65.5	B	74.85	BB	79.41	K70	房地产业	广东省	440000	深圳市	440300
000011	深物业A	2022	2	4	B	73.06	CCC	65.5	BB	75.6	BB	77.07	K70	房地产业	广东省	440000	深圳市	440300
000011	深物业A	2022	3	4	B	72.43	CCC	65.5	BB	75.6	BB	75.48	K70	房地产业	广东省	440000	深圳市	440300
000011	深物业A	2022	4	4	B	71.84	CCC	65.5	BB	75.03	B	74.42	K70	房地产业	广东省	440000	深圳市	440300
000011	深物业A	2023	1	4	B	71.84	CCC	65.5	BB	75.03	B	74.42	K70	房地产业	广东省	440000	深圳市	440300
000011	深物业A	2023	2	5	BB	76.83	B	72.23	BBB	80.89	BB	77.38	K70	房地产业	广东省	440000	深圳市	440300
000011	深物业A	2023	3	5	BB	76.43	B	72.23	BBB	80.89	BB	76.37	K70	房地产业	广东省	440000	深圳市	440300
000011	深物业A	2023	4	5	BB	76.3	B	72.23	BBB	80.6	BB	76.25	K70	房地产业	广东省	440000	深圳市	440300
000011	深物业A	2024	1	5	BB	77.66	BB	76.08	BBB	80.6	BB	76.69	K70	房地产业	广东省	440000	深圳市	440300
000011	深物业A	2024	2	4	B	70.65	B	71.4	BB	77.66	BB	77.02	K70	房地产业	广东省	440000	深圳市	440300
000011	深物业A	2024	3	4	B	72.49	B	73.99	BB	75.54	BB	77.66	K70	房地产业	广东省	440000	深圳市	440300
000011	深物业A	2024	4	4	B	71.4	B	73	BB	75.23	BB	78.52	K70	房地产业	广东省	440000	深圳市	440300
000012	南玻A	2009	1	4	B	74.96	CCC	65.55	CCC	65.01	A	86.48	C30	非金属矿物制品业	广东省	440000	深圳市	440300
000012	南玻A	2009	2	5	BB	78.88	CCC	67.13	BBB	80.16	BBB	84.02	C30	非金属矿物制品业	广东省	440000	深圳市	440300
000012	南玻A	2009	3	5	BB	78.88	CCC	67.13	BBB	80.16	BBB	84.02	C30	非金属矿物制品业	广东省	440000	深圳市	440300
000012	南玻A	2009	4	5	BB	78.88	CCC	67.13	BBB	80.16	BBB	84.02	C30	非金属矿物制品业	广东省	440000	深圳市	440300
000012	南玻A	2010	1	5	BB	78.88	CCC	67.13	BBB	80.16	BBB	84.02	C30	非金属矿物制品业	广东省	440000	深圳市	440300
000012	南玻A	2010	2	5	BB	77.98	CCC	65.55	BB	78.44	BBB	84.02	C30	非金属矿物制品业	广东省	440000	深圳市	440300
000012	南玻A	2010	3	5	BB	77.98	CCC	65.55	BB	78.44	BBB	84.02	C30	非金属矿物制品业	广东省	440000	深圳市	440300
000012	南玻A	2010	4	5	BB	77.98	CCC	65.55	BB	78.44	BBB	84.02	C30	非金属矿物制品业	广东省	440000	深圳市	440300
000012	南玻A	2011	1	5	BB	77.98	CCC	65.55	BB	78.44	BBB	84.02	C30	非金属矿物制品业	广东省	440000	深圳市	440300
000012	南玻A	2011	2	6	BBB	80.12	B	72.78	BBB	82.87	BBB	82.02	C30	非金属矿物制品业	广东省	440000	深圳市	440300
000012	南玻A	2011	3	6	BBB	80.12	B	72.78	BBB	82.87	BBB	82.02	C30	非金属矿物制品业	广东省	440000	深圳市	440300
000012	南玻A	2011	4	6	BBB	80.12	B	72.78	BBB	82.87	BBB	82.02	C30	非金属矿物制品业	广东省	440000	深圳市	440300
000012	南玻A	2012	1	6	BBB	80.12	B	72.78	BBB	82.87	BBB	82.02	C30	非金属矿物制品业	广东省	440000	深圳市	440300
000012	南玻A	2012	2	5	BB	76.72	CCC	65.55	BB	77.3	BBB	82.02	C30	非金属矿物制品业	广东省	440000	深圳市	440300
000012	南玻A	2012	3	5	BB	76.72	CCC	65.55	BB	77.3	BBB	82.02	C30	非金属矿物制品业	广东省	440000	深圳市	440300
000012	南玻A	2012	4	5	BB	77.63	CCC	65.55	BB	77.3	BBB	84.02	C30	非金属矿物制品业	广东省	440000	深圳市	440300
000012	南玻A	2013	1	5	BB	77.63	CCC	65.55	BB	77.3	BBB	84.02	C30	非金属矿物制品业	广东省	440000	深圳市	440300
000012	南玻A	2013	2	4	B	74.35	C	53.65	BB	75.69	BBB	84.02	C30	非金属矿物制品业	广东省	440000	深圳市	440300
000012	南玻A	2013	3	4	B	73.29	C	53.65	B	72.25	BBB	84.02	C30	非金属矿物制品业	广东省	440000	深圳市	440300
000012	南玻A	2013	4	4	B	73.29	C	53.65	B	72.25	BBB	84.02	C30	非金属矿物制品业	广东省	440000	深圳市	440300
000012	南玻A	2014	1	4	B	73.29	C	53.65	B	72.25	BBB	84.02	C30	非金属矿物制品业	广东省	440000	深圳市	440300
000012	南玻A	2014	2	4	B	74.92	CCC	65.55	B	71.48	BBB	82.02	C30	非金属矿物制品业	广东省	440000	深圳市	440300
000012	南玻A	2014	3	4	B	73.86	CCC	65.55	CCC	68.04	BBB	82.02	C30	非金属矿物制品业	广东省	440000	深圳市	440300
000012	南玻A	2014	4	4	B	73.86	CCC	65.55	CCC	68.04	BBB	82.02	C30	非金属矿物制品业	广东省	440000	深圳市	440300
000012	南玻A	2015	1	4	B	73.86	CCC	65.55	CCC	68.04	BBB	82.02	C30	非金属矿物制品业	广东省	440000	深圳市	440300
000012	南玻A	2015	2	5	BB	77.39	CC	63.97	BBB	80.67	BBB	82.02	C30	非金属矿物制品业	广东省	440000	深圳市	440300
000012	南玻A	2015	3	5	BB	76.32	CC	63.97	BB	77.23	BBB	82.02	C30	非金属矿物制品业	广东省	440000	深圳市	440300
000012	南玻A	2015	4	5	BB	76.32	CC	63.97	BB	77.23	BBB	82.02	C30	非金属矿物制品业	广东省	440000	深圳市	440300
000012	南玻A	2016	1	5	BB	76.32	CC	63.97	BB	77.23	BBB	82.02	C30	非金属矿物制品业	广东省	440000	深圳市	440300
000012	南玻A	2016	2	5	BB	77.02	CC	62.39	BBB	80.67	BBB	82.02	C30	非金属矿物制品业	广东省	440000	深圳市	440300
000012	南玻A	2016	3	5	BB	75.96	CC	62.39	BB	77.23	BBB	82.02	C30	非金属矿物制品业	广东省	440000	深圳市	440300
000012	南玻A	2016	4	5	BB	75.96	CC	62.39	BB	77.23	BBB	82.02	C30	非金属矿物制品业	广东省	440000	深圳市	440300
000012	南玻A	2017	1	5	BB	76.87	CC	62.39	BB	77.23	BBB	84.02	C30	非金属矿物制品业	广东省	440000	深圳市	440300
000012	南玻A	2017	2	5	BB	79.37	CCC	65.46	BBB	83.02	BBB	84.02	C30	非金属矿物制品业	广东省	440000	深圳市	440300
000012	南玻A	2017	3	5	BB	77.4	CCC	65.46	BB	79.58	BBB	82.02	C30	非金属矿物制品业	广东省	440000	深圳市	440300
000012	南玻A	2017	4	5	BB	78.31	CCC	65.46	BB	79.58	BBB	84.02	C30	非金属矿物制品业	广东省	440000	深圳市	440300
000012	南玻A	2018	1	5	BB	78.31	CCC	65.46	BB	79.58	BBB	84.02	C30	非金属矿物制品业	广东省	440000	深圳市	440300
000012	南玻A	2018	2	6	BBB	80.91	CCC	69.76	BBB	84.74	BBB	84.02	C30	非金属矿物制品业	广东省	440000	深圳市	440300
000012	南玻A	2018	3	5	BB	78.3	CCC	69.76	BBB	81.3	BBB	80.65	C30	非金属矿物制品业	广东省	440000	深圳市	440300
000012	南玻A	2018	4	5	BB	78.3	CCC	69.76	BBB	81.3	BBB	80.65	C30	非金属矿物制品业	广东省	440000	深圳市	440300
000012	南玻A	2019	1	5	BB	78.3	CCC	69.76	BBB	81.3	BBB	80.65	C30	非金属矿物制品业	广东省	440000	深圳市	440300
000012	南玻A	2019	2	5	BB	77.35	BB	75.81	B	73.61	BBB	80.65	C30	非金属矿物制品业	广东省	440000	深圳市	440300
000012	南玻A	2019	3	5	BB	77.28	BB	75.81	B	70.17	BBB	82.83	C30	非金属矿物制品业	广东省	440000	深圳市	440300
000012	南玻A	2019	4	5	BB	77.28	BB	75.81	B	70.17	BBB	82.83	C30	非金属矿物制品业	广东省	440000	深圳市	440300
000012	南玻A	2020	1	5	BB	76.28	BB	75.81	B	70.17	BBB	80.65	C30	非金属矿物制品业	广东省	440000	深圳市	440300
000012	南玻A	2020	2	5	BB	77.81	B	72.59	BB	77.55	BBB	80.65	C30	非金属矿物制品业	广东省	440000	深圳市	440300
000012	南玻A	2020	3	5	BB	77.66	B	72.59	B	74.11	BBB	82.65	C30	非金属矿物制品业	广东省	440000	深圳市	440300
000012	南玻A	2020	4	5	BB	77.66	B	72.59	B	74.11	BBB	82.65	C30	非金属矿物制品业	广东省	440000	深圳市	440300
000012	南玻A	2021	1	5	BB	77.66	B	72.59	B	74.11	BBB	82.65	C30	非金属矿物制品业	广东省	440000	深圳市	440300
000012	南玻A	2021	2	4	B	71.39	C	57.1	BB	77.74	BBB	82.87	C30	非金属矿物制品业	广东省	440000	深圳市	440300
000012	南玻A	2021	3	4	B	70.78	C	57.1	BB	77.74	BBB	81.28	C30	非金属矿物制品业	广东省	440000	深圳市	440300
000012	南玻A	2021	4	4	B	71	C	57.1	BB	77.34	BBB	82.08	C30	非金属矿物制品业	广东省	440000	深圳市	440300
000012	南玻A	2022	1	4	B	71	C	57.1	BB	77.34	BBB	82.08	C30	非金属矿物制品业	广东省	440000	深圳市	440300
000012	南玻A	2022	2	4	B	70.37	C	56.94	BB	76.42	BBB	81.11	C30	非金属矿物制品业	广东省	440000	深圳市	440300
000012	南玻A	2022	3	3	CCC	69.88	C	56.94	BB	76.42	BB	79.84	C30	非金属矿物制品业	广东省	440000	深圳市	440300
000012	南玻A	2022	4	3	CCC	69.36	C	56.94	B	74.45	BB	79.58	C30	非金属矿物制品业	广东省	440000	深圳市	440300
000012	南玻A	2023	1	3	CCC	69.7	C	56.93	BB	76.03	BB	79.58	C30	非金属矿物制品业	广东省	440000	深圳市	440300
000012	南玻A	2023	2	4	B	70.53	C	57.52	BB	76.95	BBB	80.63	C30	非金属矿物制品业	广东省	440000	深圳市	440300
000012	南玻A	2023	3	4	B	73.34	CC	60.43	BBB	80.27	BBB	83.81	C30	非金属矿物制品业	广东省	440000	深圳市	440300
000012	南玻A	2023	4	4	B	71.67	C	57.52	BB	76.55	BBB	83.81	C30	非金属矿物制品业	广东省	440000	深圳市	440300
000012	南玻A	2024	1	4	B	72.5	CC	60.28	BB	76.55	BBB	83.06	C30	非金属矿物制品业	广东省	440000	深圳市	440300
000012	南玻A	2024	2	2	CC	64.7	CC	60.64	BB	76.09	BBB	82.63	C30	非金属矿物制品业	广东省	440000	深圳市	440300
000012	南玻A	2024	3	3	CCC	67.85	CC	60.8	BBB	83.82	BBB	81.22	C30	非金属矿物制品业	广东省	440000	深圳市	440300
000012	南玻A	2024	4	2	CC	63.84	CC	60.53	BBB	83.45	BB	76.77	C30	非金属矿物制品业	广东省	440000	深圳市	440300
000014	沙河股份	2009	1	5	BB	77.32	C	51.51	BB	78.89	BBB	84.34	K70	房地产业	广东省	440000	深圳市	440300
000014	沙河股份	2009	2	5	BB	76.29	C	53.09	BB	76.8	BBB	83.45	K70	房地产业	广东省	440000	深圳市	440300
000014	沙河股份	2009	3	4	B	74.62	C	53.09	BB	76.8	BB	79.64	K70	房地产业	广东省	440000	深圳市	440300
000014	沙河股份	2009	4	4	B	73.44	C	53.09	BB	76.8	BB	76.97	K70	房地产业	广东省	440000	深圳市	440300
000014	沙河股份	2010	1	4	B	74.23	C	53.09	BB	76.8	BB	78.75	K70	房地产业	广东省	440000	深圳市	440300
000014	沙河股份	2010	2	4	B	72.69	C	59.84	B	72.63	BB	76.97	K70	房地产业	广东省	440000	深圳市	440300
000014	沙河股份	2010	3	4	B	72.69	C	59.84	B	72.63	BB	76.97	K70	房地产业	广东省	440000	深圳市	440300
000014	沙河股份	2010	4	4	B	72.69	C	59.84	B	72.63	BB	76.97	K70	房地产业	广东省	440000	深圳市	440300
000014	沙河股份	2011	1	4	B	72.69	C	59.84	B	72.63	BB	76.97	K70	房地产业	广东省	440000	深圳市	440300
000014	沙河股份	2011	2	4	B	72.48	C	51.51	B	72.63	BB	79.26	K70	房地产业	广东省	440000	深圳市	440300
000014	沙河股份	2011	3	4	B	72.88	C	51.51	B	72.63	BBB	80.15	K70	房地产业	广东省	440000	深圳市	440300
000014	沙河股份	2011	4	4	B	73.27	C	51.51	B	72.63	BBB	81.04	K70	房地产业	广东省	440000	深圳市	440300
000014	沙河股份	2012	1	4	B	73.27	C	51.51	B	72.63	BBB	81.04	K70	房地产业	广东省	440000	深圳市	440300
000014	沙河股份	2012	2	5	BB	77.23	C	54.89	BBB	80.98	BBB	81.04	K70	房地产业	广东省	440000	深圳市	440300
000014	沙河股份	2012	3	5	BB	77.23	C	54.89	BBB	80.98	BBB	81.04	K70	房地产业	广东省	440000	深圳市	440300
000014	沙河股份	2012	4	5	BB	76.84	C	54.89	BBB	80.98	BBB	80.15	K70	房地产业	广东省	440000	深圳市	440300
000014	沙河股份	2013	1	5	BB	76.45	C	54.89	BBB	80.98	BB	79.26	K70	房地产业	广东省	440000	深圳市	440300
000014	沙河股份	2013	2	4	B	72.96	C	51.51	B	74.71	BB	78.37	K70	房地产业	广东省	440000	深圳市	440300
000014	沙河股份	2013	3	4	B	73.35	C	51.51	B	74.71	BB	79.26	K70	房地产业	广东省	440000	深圳市	440300
000014	沙河股份	2013	4	3	CCC	65.69	C	51.51	B	74.71	CC	61.81	K70	房地产业	广东省	440000	深圳市	440300
000014	沙河股份	2014	1	3	CCC	66.08	C	51.51	B	74.71	CC	62.7	K70	房地产业	广东省	440000	深圳市	440300
000014	沙河股份	2014	2	4	B	73.18	C	53.31	BBB	84.32	CCC	69.18	K70	房地产业	广东省	440000	深圳市	440300
000014	沙河股份	2014	3	4	B	73.18	C	53.31	BBB	84.32	CCC	69.18	K70	房地产业	广东省	440000	深圳市	440300
000014	沙河股份	2014	4	5	BB	75.78	C	53.31	BBB	84.32	BB	75.11	K70	房地产业	广东省	440000	深圳市	440300
000014	沙河股份	2015	1	5	BB	75.78	C	53.31	BBB	84.32	BB	75.11	K70	房地产业	广东省	440000	深圳市	440300
000014	沙河股份	2015	2	4	B	72.92	C	51.51	BB	78.06	BB	75.11	K70	房地产业	广东省	440000	深圳市	440300
000014	沙河股份	2015	3	4	B	72.92	C	51.51	BB	78.06	BB	75.11	K70	房地产业	广东省	440000	深圳市	440300
000014	沙河股份	2015	4	4	B	73.83	C	51.51	BB	78.06	BB	77.18	K70	房地产业	广东省	440000	深圳市	440300
000014	沙河股份	2016	1	4	B	73.05	C	51.51	BB	78.06	BB	75.41	K70	房地产业	广东省	440000	深圳市	440300
000014	沙河股份	2016	2	4	B	72.09	C	51.51	B	73.88	BB	77.18	K70	房地产业	广东省	440000	深圳市	440300
000014	沙河股份	2016	3	4	B	71.31	C	51.51	B	73.88	BB	75.41	K70	房地产业	广东省	440000	深圳市	440300
000014	沙河股份	2016	4	4	B	72.01	C	51.51	B	74.3	BB	76.59	K70	房地产业	广东省	440000	深圳市	440300
000014	沙河股份	2017	1	4	B	72.62	C	51.51	B	74.3	BB	77.99	K70	房地产业	广东省	440000	深圳市	440300
000014	沙河股份	2017	2	4	B	73.15	C	52.41	BB	75.8	BB	77.48	K70	房地产业	广东省	440000	深圳市	440300
000014	沙河股份	2017	3	4	B	73.15	C	52.41	BB	75.8	BB	77.48	K70	房地产业	广东省	440000	深圳市	440300
000014	沙河股份	2017	4	4	B	73.15	C	52.41	BB	75.8	BB	77.48	K70	房地产业	广东省	440000	深圳市	440300
000014	沙河股份	2018	1	4	B	73.54	C	52.41	BB	75.8	BB	78.37	K70	房地产业	广东省	440000	深圳市	440300
000014	沙河股份	2018	2	4	B	73.74	C	54.21	B	74.71	BB	79.26	K70	房地产业	广东省	440000	深圳市	440300
000014	沙河股份	2018	3	4	B	72.7	C	54.21	B	74.71	BB	76.89	K70	房地产业	广东省	440000	深圳市	440300
000014	沙河股份	2018	4	4	B	73.09	C	54.21	B	74.71	BB	77.78	K70	房地产业	广东省	440000	深圳市	440300
000014	沙河股份	2019	1	4	B	72.7	C	54.21	B	74.71	BB	76.89	K70	房地产业	广东省	440000	深圳市	440300
000014	沙河股份	2019	2	4	B	71.57	C	52.41	B	72.63	BB	76.89	K70	房地产业	广东省	440000	深圳市	440300
000014	沙河股份	2019	3	4	B	71.18	C	52.41	B	72.63	BB	76	K70	房地产业	广东省	440000	深圳市	440300
000014	沙河股份	2019	4	4	B	71.57	C	52.41	B	72.63	BB	76.89	K70	房地产业	广东省	440000	深圳市	440300
000014	沙河股份	2020	1	4	B	71.57	C	52.41	B	72.63	BB	76.89	K70	房地产业	广东省	440000	深圳市	440300
000014	沙河股份	2020	2	4	B	73.7	C	52.41	BB	76.8	BB	77.78	K70	房地产业	广东省	440000	深圳市	440300
000014	沙河股份	2020	3	4	B	73.7	C	52.41	BB	76.8	BB	77.78	K70	房地产业	广东省	440000	深圳市	440300
000014	沙河股份	2020	4	4	B	73.31	C	52.41	BB	76.8	BB	76.89	K70	房地产业	广东省	440000	深圳市	440300
000014	沙河股份	2021	1	4	B	73.31	C	52.41	BB	76.8	BB	76.89	K70	房地产业	广东省	440000	深圳市	440300
000014	沙河股份	2021	2	4	B	73	CCC	65.5	B	73.01	BB	78.87	K70	房地产业	广东省	440000	深圳市	440300
000014	沙河股份	2021	3	4	B	73	CCC	65.5	B	73.01	BB	78.87	K70	房地产业	广东省	440000	深圳市	440300
000014	沙河股份	2021	4	4	B	72.33	CCC	65.5	B	72.44	BB	77.59	K70	房地产业	广东省	440000	深圳市	440300
000014	沙河股份	2022	1	4	B	71.58	CCC	65.5	B	72.44	BB	75.69	K70	房地产业	广东省	440000	深圳市	440300
000014	沙河股份	2022	2	4	B	72	CCC	65.5	B	73.88	BB	75.69	K70	房地产业	广东省	440000	深圳市	440300
000014	沙河股份	2022	3	4	B	72	CCC	65.5	B	73.88	BB	75.69	K70	房地产业	广东省	440000	深圳市	440300
000014	沙河股份	2022	4	4	B	72.84	CCC	65.5	B	73.88	BB	77.81	K70	房地产业	广东省	440000	深圳市	440300
000014	沙河股份	2023	1	4	B	72.84	CCC	65.5	B	73.88	BB	77.81	K70	房地产业	广东省	440000	深圳市	440300
000014	沙河股份	2023	2	5	BB	78.35	B	73.66	BBB	81.54	BB	79.62	K70	房地产业	广东省	440000	深圳市	440300
000014	沙河股份	2023	3	5	BB	77.93	B	73.66	BBB	81.54	BB	78.56	K70	房地产业	广东省	440000	深圳市	440300
000014	沙河股份	2023	4	5	BB	79.33	B	73.67	BBB	81.54	BBB	82.11	K70	房地产业	广东省	440000	深圳市	440300
000014	沙河股份	2024	1	5	BB	78.93	B	73.6	BBB	81.54	BBB	81.15	K70	房地产业	广东省	440000	深圳市	440300
000014	沙河股份	2024	2	6	BBB	81.82	B	73.25	A	85.46	BBB	83.85	K70	房地产业	广东省	440000	深圳市	440300
000014	沙河股份	2024	3	7	A	86.29	BB	76.93	BBB	83.34	A	87.46	K70	房地产业	广东省	440000	深圳市	440300
000014	沙河股份	2024	4	7	A	86.69	BB	77.58	BBB	83.34	A	88.04	K70	房地产业	广东省	440000	深圳市	440300
000016	深康佳A	2009	1	3	CCC	68.95	C	59.25	C	53.04	BBB	84.63	C39	计算机、通信和其他电子设备制造业	广东省	440000	深圳市	440300
000016	深康佳A	2009	2	4	B	70.52	C	52.93	CC	64.12	BBB	83.81	C39	计算机、通信和其他电子设备制造业	广东省	440000	深圳市	440300
000016	深康佳A	2009	3	4	B	70.89	C	52.93	CC	64.12	BBB	84.63	C39	计算机、通信和其他电子设备制造业	广东省	440000	深圳市	440300
000016	深康佳A	2009	4	4	B	70.78	C	52.93	CC	64.98	BBB	83.81	C39	计算机、通信和其他电子设备制造业	广东省	440000	深圳市	440300
000016	深康佳A	2010	1	2	CC	62.41	CC	61	CC	64.98	CC	61.41	C39	计算机、通信和其他电子设备制造业	广东省	440000	深圳市	440300
000016	深康佳A	2010	2	2	CC	63.69	C	59.21	B	71.68	CC	60.59	C39	计算机、通信和其他电子设备制造业	广东省	440000	深圳市	440300
000016	深康佳A	2010	3	2	CC	64.06	C	59.21	B	71.68	CC	61.41	C39	计算机、通信和其他电子设备制造业	广东省	440000	深圳市	440300
000016	深康佳A	2010	4	2	CC	64.06	C	59.21	B	71.68	CC	61.41	C39	计算机、通信和其他电子设备制造业	广东省	440000	深圳市	440300
000016	深康佳A	2011	1	3	CCC	69.19	C	59.21	B	71.68	B	72.61	C39	计算机、通信和其他电子设备制造业	广东省	440000	深圳市	440300
000016	深康佳A	2011	2	3	CCC	68.67	CC	62.37	CCC	68.83	B	71.79	C39	计算机、通信和其他电子设备制造业	广东省	440000	深圳市	440300
000016	深康佳A	2011	3	3	CCC	68.67	CC	62.37	CCC	68.83	B	71.79	C39	计算机、通信和其他电子设备制造业	广东省	440000	深圳市	440300
000016	深康佳A	2011	4	3	CCC	68.67	CC	62.37	CCC	68.83	B	71.79	C39	计算机、通信和其他电子设备制造业	广东省	440000	深圳市	440300
000016	深康佳A	2012	1	4	B	71.24	CC	62.37	CCC	68.83	BB	77.39	C39	计算机、通信和其他电子设备制造业	广东省	440000	深圳市	440300
000016	深康佳A	2012	2	4	B	70.5	CC	63.95	CCC	66.47	BB	76.57	C39	计算机、通信和其他电子设备制造业	广东省	440000	深圳市	440300
000016	深康佳A	2012	3	4	B	70.88	CC	63.95	CCC	66.47	BB	77.39	C39	计算机、通信和其他电子设备制造业	广东省	440000	深圳市	440300
000016	深康佳A	2012	4	4	B	70.88	CC	63.95	CCC	66.47	BB	77.39	C39	计算机、通信和其他电子设备制造业	广东省	440000	深圳市	440300
000016	深康佳A	2013	1	4	B	73.07	CC	63.95	CCC	66.47	BBB	82.17	C39	计算机、通信和其他电子设备制造业	广东省	440000	深圳市	440300
000016	深康佳A	2013	2	4	B	74.94	CCC	65.74	B	71.18	BBB	82.17	C39	计算机、通信和其他电子设备制造业	广东省	440000	深圳市	440300
000016	深康佳A	2013	3	4	B	74.56	CCC	65.74	B	71.18	BBB	81.36	C39	计算机、通信和其他电子设备制造业	广东省	440000	深圳市	440300
000016	深康佳A	2013	4	4	B	74.56	CCC	65.74	B	71.18	BBB	81.36	C39	计算机、通信和其他电子设备制造业	广东省	440000	深圳市	440300
000016	深康佳A	2014	1	4	B	74.56	CCC	65.74	B	71.18	BBB	81.36	C39	计算机、通信和其他电子设备制造业	广东省	440000	深圳市	440300
000016	深康佳A	2014	2	4	B	73.49	CCC	65.74	CCC	66.47	BBB	82.17	C39	计算机、通信和其他电子设备制造业	广东省	440000	深圳市	440300
000016	深康佳A	2014	3	4	B	73.11	CCC	65.74	CCC	66.47	BBB	81.36	C39	计算机、通信和其他电子设备制造业	广东省	440000	深圳市	440300
000016	深康佳A	2014	4	4	B	73.75	CCC	65.74	CCC	67.33	BBB	82.17	C39	计算机、通信和其他电子设备制造业	广东省	440000	深圳市	440300
000016	深康佳A	2015	1	4	B	73.75	CCC	65.74	CCC	67.33	BBB	82.17	C39	计算机、通信和其他电子设备制造业	广东省	440000	深圳市	440300
000016	深康佳A	2015	2	4	B	71.45	CC	64.16	CC	62.27	BBB	81.36	C39	计算机、通信和其他电子设备制造业	广东省	440000	深圳市	440300
000016	深康佳A	2015	3	4	B	71.82	CC	64.16	CC	62.27	BBB	82.17	C39	计算机、通信和其他电子设备制造业	广东省	440000	深圳市	440300
000016	深康佳A	2015	4	4	B	72.73	CC	64.16	CC	62.27	BBB	84.17	C39	计算机、通信和其他电子设备制造业	广东省	440000	深圳市	440300
000016	深康佳A	2016	1	4	B	72.58	CCC	69	CC	62.27	BBB	81.36	C39	计算机、通信和其他电子设备制造业	广东省	440000	深圳市	440300
000016	深康佳A	2016	2	4	B	71.84	CCC	69	CC	64.63	BB	78.16	C39	计算机、通信和其他电子设备制造业	广东省	440000	深圳市	440300
000016	深康佳A	2016	3	4	B	71.84	CCC	69	CC	64.63	BB	78.16	C39	计算机、通信和其他电子设备制造业	广东省	440000	深圳市	440300
000016	深康佳A	2016	4	4	B	72.22	CCC	69	CC	64.63	BB	78.98	C39	计算机、通信和其他电子设备制造业	广东省	440000	深圳市	440300
000016	深康佳A	2017	1	4	B	72.22	CCC	69	CC	64.63	BB	78.98	C39	计算机、通信和其他电子设备制造业	广东省	440000	深圳市	440300
000016	深康佳A	2017	2	4	B	73.7	B	70.39	CC	64.86	BBB	81.36	C39	计算机、通信和其他电子设备制造业	广东省	440000	深圳市	440300
000016	深康佳A	2017	3	4	B	73.7	B	70.39	CC	64.86	BBB	81.36	C39	计算机、通信和其他电子设备制造业	广东省	440000	深圳市	440300
000016	深康佳A	2017	4	4	B	74.07	B	70.39	CC	64.86	BBB	82.17	C39	计算机、通信和其他电子设备制造业	广东省	440000	深圳市	440300
000016	深康佳A	2018	1	4	B	74.07	B	70.39	CC	64.86	BBB	82.17	C39	计算机、通信和其他电子设备制造业	广东省	440000	深圳市	440300
000016	深康佳A	2018	2	5	BB	75.26	B	70.39	CCC	68.7	BBB	82.17	C39	计算机、通信和其他电子设备制造业	广东省	440000	深圳市	440300
000016	深康佳A	2018	3	4	B	74.26	B	70.39	CCC	68.7	BB	79.99	C39	计算机、通信和其他电子设备制造业	广东省	440000	深圳市	440300
000016	深康佳A	2018	4	4	B	74.26	B	70.39	CCC	68.7	BB	79.99	C39	计算机、通信和其他电子设备制造业	广东省	440000	深圳市	440300
000016	深康佳A	2019	1	4	B	73.51	CCC	67.16	CCC	68.7	BB	79.99	C39	计算机、通信和其他电子设备制造业	广东省	440000	深圳市	440300
000016	深康佳A	2019	2	4	B	72.34	B	70.32	B	71.05	B	74.25	C39	计算机、通信和其他电子设备制造业	广东省	440000	深圳市	440300
000016	深康佳A	2019	3	4	B	72.34	B	70.32	B	71.05	B	74.25	C39	计算机、通信和其他电子设备制造业	广东省	440000	深圳市	440300
000016	深康佳A	2019	4	4	B	73.47	B	73.55	B	71.05	BB	75.07	C39	计算机、通信和其他电子设备制造业	广东省	440000	深圳市	440300
000016	深康佳A	2020	1	4	B	73.47	B	73.55	B	71.05	BB	75.07	C39	计算机、通信和其他电子设备制造业	广东省	440000	深圳市	440300
000016	深康佳A	2020	2	4	B	71.84	B	73.55	CC	63.54	BB	76.57	C39	计算机、通信和其他电子设备制造业	广东省	440000	深圳市	440300
000016	深康佳A	2020	3	4	B	71.84	B	73.55	CC	63.54	BB	76.57	C39	计算机、通信和其他电子设备制造业	广东省	440000	深圳市	440300
000016	深康佳A	2020	4	4	B	71.84	B	73.55	CC	63.54	BB	76.57	C39	计算机、通信和其他电子设备制造业	广东省	440000	深圳市	440300
000016	深康佳A	2021	1	4	B	71.84	B	73.55	CC	63.54	BB	76.57	C39	计算机、通信和其他电子设备制造业	广东省	440000	深圳市	440300
000016	深康佳A	2021	2	4	B	72.98	CC	62.45	BB	76.67	BB	75.81	C39	计算机、通信和其他电子设备制造业	广东省	440000	深圳市	440300
000016	深康佳A	2021	3	4	B	72.98	CC	62.45	BB	76.67	BB	75.81	C39	计算机、通信和其他电子设备制造业	广东省	440000	深圳市	440300
000016	深康佳A	2021	4	4	B	73.24	CC	62.45	BB	76.67	BB	76.44	C39	计算机、通信和其他电子设备制造业	广东省	440000	深圳市	440300
000016	深康佳A	2022	1	4	B	72.98	CC	62.45	BB	76.67	BB	75.81	C39	计算机、通信和其他电子设备制造业	广东省	440000	深圳市	440300
000016	深康佳A	2022	2	4	B	72.9	CC	62.45	BB	77.94	B	74.48	C39	计算机、通信和其他电子设备制造业	广东省	440000	深圳市	440300
000016	深康佳A	2022	3	4	B	72.9	CC	62.45	BB	77.94	B	74.48	C39	计算机、通信和其他电子设备制造业	广东省	440000	深圳市	440300
000016	深康佳A	2022	4	4	B	73.04	CC	62.45	BB	76.23	BB	76.33	C39	计算机、通信和其他电子设备制造业	广东省	440000	深圳市	440300
000016	深康佳A	2023	1	4	B	72.61	CC	62.45	BB	76.23	BB	75.27	C39	计算机、通信和其他电子设备制造业	广东省	440000	深圳市	440300
000016	深康佳A	2023	2	6	BBB	80.12	B	72.33	A	85.65	BB	79.73	C39	计算机、通信和其他电子设备制造业	广东省	440000	深圳市	440300
000016	深康佳A	2023	3	5	BB	77.22	B	72.33	A	85.65	B	72.58	C39	计算机、通信和其他电子设备制造业	广东省	440000	深圳市	440300
000016	深康佳A	2023	4	5	BB	76.9	B	72.33	A	85.65	B	71.79	C39	计算机、通信和其他电子设备制造业	广东省	440000	深圳市	440300
000016	深康佳A	2024	1	5	BB	77.92	BB	76.7	A	85.65	B	71.79	C39	计算机、通信和其他电子设备制造业	广东省	440000	深圳市	440300
000016	深康佳A	2024	2	3	CCC	68.45	B	72.63	BBB	84.55	CCC	69.18	C39	计算机、通信和其他电子设备制造业	广东省	440000	深圳市	440300
000016	深康佳A	2024	3	4	B	74.97	B	74	A	86.25	B	73.22	C39	计算机、通信和其他电子设备制造业	广东省	440000	深圳市	440300
000016	深康佳A	2024	4	4	B	71.51	B	73.47	A	87.1	CCC	68.24	C39	计算机、通信和其他电子设备制造业	广东省	440000	深圳市	440300
000017	SST 中华A	2009	1	3	CCC	66.29	C	47.98	C	55.39	BBB	82.99	C37	铁路、船舶、航空航天和其它运输设备制造业	广东省	440000	深圳市	440300
000017	SST 中华A	2009	2	2	CC	62.65	C	46.19	C	58.2	B	74.06	C37	铁路、船舶、航空航天和其它运输设备制造业	广东省	440000	深圳市	440300
000017	SST 中华A	2009	3	2	CC	62.2	C	46.19	C	58.2	B	73.07	C37	铁路、船舶、航空航天和其它运输设备制造业	广东省	440000	深圳市	440300
000017	SST 中华A	2009	4	2	CC	61.82	C	46.19	C	58.2	B	72.25	C37	铁路、船舶、航空航天和其它运输设备制造业	广东省	440000	深圳市	440300
000017	*ST 中华A	2010	1	2	CC	61.82	C	46.19	C	58.2	B	72.25	C37	铁路、船舶、航空航天和其它运输设备制造业	广东省	440000	深圳市	440300
000017	*ST 中华A	2010	2	1	C	59.69	C	46.19	C	53.04	B	71.07	C37	铁路、船舶、航空航天和其它运输设备制造业	广东省	440000	深圳市	440300
000017	*ST 中华A	2010	3	2	CC	60.6	C	46.19	C	53.04	B	73.07	C37	铁路、船舶、航空航天和其它运输设备制造业	广东省	440000	深圳市	440300
000017	*ST 中华A	2010	4	2	CC	60.6	C	46.19	C	53.04	B	73.07	C37	铁路、船舶、航空航天和其它运输设备制造业	广东省	440000	深圳市	440300
000017	*ST 中华A	2011	1	2	CC	60.6	C	46.19	C	53.04	B	73.07	C37	铁路、船舶、航空航天和其它运输设备制造业	广东省	440000	深圳市	440300
000017	*ST 中华A	2011	2	2	CC	64.48	C	49.77	CC	60.45	B	74.71	C37	铁路、船舶、航空航天和其它运输设备制造业	广东省	440000	深圳市	440300
000017	*ST 中华A	2011	3	2	CC	64.48	C	49.77	CC	60.45	B	74.71	C37	铁路、船舶、航空航天和其它运输设备制造业	广东省	440000	深圳市	440300
000017	*ST 中华A	2011	4	2	CC	63.73	C	49.77	CC	60.45	B	73.07	C37	铁路、船舶、航空航天和其它运输设备制造业	广东省	440000	深圳市	440300
000017	*ST 中华A	2012	1	2	CC	63.73	C	49.77	CC	60.45	B	73.07	C37	铁路、船舶、航空航天和其它运输设备制造业	广东省	440000	深圳市	440300
000017	*ST 中华A	2012	2	2	CC	64.1	C	49.77	CC	60.45	B	73.89	C37	铁路、船舶、航空航天和其它运输设备制造业	广东省	440000	深圳市	440300
000017	*ST 中华A	2012	3	2	CC	63.73	C	49.77	CC	60.45	B	73.07	C37	铁路、船舶、航空航天和其它运输设备制造业	广东省	440000	深圳市	440300
000017	*ST 中华A	2012	4	2	CC	63.35	C	49.77	CC	60.45	B	72.25	C37	铁路、船舶、航空航天和其它运输设备制造业	广东省	440000	深圳市	440300
000017	*ST 中华A	2013	1	2	CC	63.73	C	49.77	CC	60.45	B	73.07	C37	铁路、船舶、航空航天和其它运输设备制造业	广东省	440000	深圳市	440300
000017	*ST 中华A	2013	2	2	CC	62.92	C	47.98	C	56.75	B	74.71	C37	铁路、船舶、航空航天和其它运输设备制造业	广东省	440000	深圳市	440300
000017	*ST 中华A	2013	3	2	CC	62.92	C	47.98	C	56.75	B	74.71	C37	铁路、船舶、航空航天和其它运输设备制造业	广东省	440000	深圳市	440300
000017	*ST 中华A	2013	4	2	CC	61.71	C	47.98	C	56.75	B	72.07	C37	铁路、船舶、航空航天和其它运输设备制造业	广东省	440000	深圳市	440300
000017	深中华A	2014	1	2	CC	61.71	C	47.98	C	56.75	B	72.07	C37	铁路、船舶、航空航天和其它运输设备制造业	广东省	440000	深圳市	440300
000017	深中华A	2014	2	2	CC	62.82	C	51.35	C	53.04	BB	75.27	C37	铁路、船舶、航空航天和其它运输设备制造业	广东省	440000	深圳市	440300
000017	深中华A	2014	3	2	CC	63.75	C	51.35	C	53.04	BB	77.31	C37	铁路、船舶、航空航天和其它运输设备制造业	广东省	440000	深圳市	440300
000017	深中华A	2014	4	2	CC	63.75	C	51.35	C	53.04	BB	77.31	C37	铁路、船舶、航空航天和其它运输设备制造业	广东省	440000	深圳市	440300
000017	深中华A	2015	1	2	CC	63.75	C	51.35	C	53.04	BB	77.31	C37	铁路、船舶、航空航天和其它运输设备制造业	广东省	440000	深圳市	440300
000017	深中华A	2015	2	3	CCC	67.1	C	47.98	CC	60.1	BBB	81.59	C37	铁路、船舶、航空航天和其它运输设备制造业	广东省	440000	深圳市	440300
000017	深中华A	2015	3	3	CCC	67.1	C	47.98	CC	60.1	BBB	81.59	C37	铁路、船舶、航空航天和其它运输设备制造业	广东省	440000	深圳市	440300
000017	深中华A	2015	4	3	CCC	66.35	C	47.98	CC	60.1	BB	79.95	C37	铁路、船舶、航空航天和其它运输设备制造业	广东省	440000	深圳市	440300
000017	深中华A	2016	1	3	CCC	66.35	C	47.98	CC	60.1	BB	79.95	C37	铁路、船舶、航空航天和其它运输设备制造业	广东省	440000	深圳市	440300
000017	深中华A	2016	2	2	CC	62.86	C	47.98	CCC	67.28	CCC	67.47	C37	铁路、船舶、航空航天和其它运输设备制造业	广东省	440000	深圳市	440300
000017	深中华A	2016	3	2	CC	62.86	C	47.98	CCC	67.28	CCC	67.47	C37	铁路、船舶、航空航天和其它运输设备制造业	广东省	440000	深圳市	440300
000017	深中华A	2016	4	2	CC	62.11	C	47.98	CCC	67.28	CCC	65.83	C37	铁路、船舶、航空航天和其它运输设备制造业	广东省	440000	深圳市	440300
000017	深中华A	2017	1	2	CC	61.73	C	47.98	CCC	67.28	CCC	65.01	C37	铁路、船舶、航空航天和其它运输设备制造业	广东省	440000	深圳市	440300
000017	深中华A	2017	2	2	CC	63.45	C	49.36	C	57.74	B	74.49	C37	铁路、船舶、航空航天和其它运输设备制造业	广东省	440000	深圳市	440300
000017	深中华A	2017	3	2	CC	62.99	C	49.36	C	57.74	B	73.49	C37	铁路、船舶、航空航天和其它运输设备制造业	广东省	440000	深圳市	440300
000017	深中华A	2017	4	2	CC	62.99	C	49.36	C	57.74	B	73.49	C37	铁路、船舶、航空航天和其它运输设备制造业	广东省	440000	深圳市	440300
000017	深中华A	2018	1	2	CC	62.99	C	49.36	C	57.74	B	73.49	C37	铁路、船舶、航空航天和其它运输设备制造业	广东省	440000	深圳市	440300
000017	深中华A	2018	2	2	CC	63.82	C	47.57	C	57.74	BB	76.22	C37	铁路、船舶、航空航天和其它运输设备制造业	广东省	440000	深圳市	440300
000017	深中华A	2018	3	2	CC	63.07	C	47.57	C	57.74	B	74.58	C37	铁路、船舶、航空航天和其它运输设备制造业	广东省	440000	深圳市	440300
000017	深中华A	2018	4	2	CC	63.39	C	47.57	CC	61.18	B	72.94	C37	铁路、船舶、航空航天和其它运输设备制造业	广东省	440000	深圳市	440300
000017	深中华A	2019	1	2	CC	63.76	C	47.57	CC	61.18	B	73.76	C37	铁路、船舶、航空航天和其它运输设备制造业	广东省	440000	深圳市	440300
000017	深中华A	2019	2	2	CC	63.82	C	49.36	CC	63.54	B	71.39	C37	铁路、船舶、航空航天和其它运输设备制造业	广东省	440000	深圳市	440300
000017	深中华A	2019	3	2	CC	63.82	C	49.36	CC	63.54	B	71.39	C37	铁路、船舶、航空航天和其它运输设备制造业	广东省	440000	深圳市	440300
000017	深中华A	2019	4	2	CC	63.44	C	49.36	CC	63.54	B	70.57	C37	铁路、船舶、航空航天和其它运输设备制造业	广东省	440000	深圳市	440300
000017	*ST 中华A	2020	1	2	CC	63.44	C	49.36	CC	63.54	B	70.57	C37	铁路、船舶、航空航天和其它运输设备制造业	广东省	440000	深圳市	440300
000017	*ST 中华A	2020	2	2	CC	64.52	C	49.36	CCC	68.24	CCC	69.75	C37	铁路、船舶、航空航天和其它运输设备制造业	广东省	440000	深圳市	440300
000017	*ST 中华A	2020	3	2	CC	63.61	C	49.36	CCC	68.24	CCC	67.75	C37	铁路、船舶、航空航天和其它运输设备制造业	广东省	440000	深圳市	440300
000017	*ST 中华A	2020	4	2	CC	64.52	C	49.36	CCC	68.24	CCC	69.75	C37	铁路、船舶、航空航天和其它运输设备制造业	广东省	440000	深圳市	440300
000017	深中华A	2021	1	2	CC	64.9	C	49.36	CCC	68.24	B	70.57	C37	铁路、船舶、航空航天和其它运输设备制造业	广东省	440000	深圳市	440300
000017	深中华A	2021	2	3	CCC	67.79	CC	60.95	CCC	66.98	B	72.32	C37	铁路、船舶、航空航天和其它运输设备制造业	广东省	440000	深圳市	440300
000017	深中华A	2021	3	3	CCC	67.79	CC	60.95	CCC	66.98	B	72.32	C37	铁路、船舶、航空航天和其它运输设备制造业	广东省	440000	深圳市	440300
000017	深中华A	2021	4	3	CCC	68.18	CC	60.95	CCC	68.23	B	72.32	C37	铁路、船舶、航空航天和其它运输设备制造业	广东省	440000	深圳市	440300
000017	深中华A	2022	1	3	CCC	68.18	CC	60.95	CCC	68.23	B	72.32	C37	铁路、船舶、航空航天和其它运输设备制造业	广东省	440000	深圳市	440300
000017	深中华A	2022	2	3	CCC	67.18	CC	60.95	CC	63.97	B	73.12	C37	铁路、船舶、航空航天和其它运输设备制造业	广东省	440000	深圳市	440300
000017	深中华A	2022	3	3	CCC	67.18	CC	60.95	CC	63.97	B	73.12	C37	铁路、船舶、航空航天和其它运输设备制造业	广东省	440000	深圳市	440300
000017	深中华A	2022	4	3	CCC	66.07	CC	60.95	CCC	65.22	CCC	69.65	C37	铁路、船舶、航空航天和其它运输设备制造业	广东省	440000	深圳市	440300
000017	深中华A	2023	1	3	CCC	67.31	CC	60.95	CCC	65.22	B	72.51	C37	铁路、船舶、航空航天和其它运输设备制造业	广东省	440000	深圳市	440300
000017	深中华A	2023	2	3	CCC	68.61	C	59.9	CC	64.57	BB	76.59	C37	铁路、船舶、航空航天和其它运输设备制造业	广东省	440000	深圳市	440300
000017	深中华A	2023	3	3	CCC	68.61	C	59.9	CC	64.57	BB	76.59	C37	铁路、船舶、航空航天和其它运输设备制造业	广东省	440000	深圳市	440300
000017	深中华A	2023	4	3	CCC	68.61	C	59.9	CC	64.57	BB	76.59	C37	铁路、船舶、航空航天和其它运输设备制造业	广东省	440000	深圳市	440300
000017	深中华A	2024	1	3	CCC	68.25	C	59.9	CC	64.57	BB	75.75	C37	铁路、船舶、航空航天和其它运输设备制造业	广东省	440000	深圳市	440300
000017	深中华A	2024	2	1	C	57.08	CC	61.68	CCC	68.17	BB	76.29	C37	铁路、船舶、航空航天和其它运输设备制造业	广东省	440000	深圳市	440300
000017	深中华A	2024	3	1	C	57.23	C	59.9	B	70.39	BB	75.34	C37	铁路、船舶、航空航天和其它运输设备制造业	广东省	440000	深圳市	440300
000017	深中华A	2024	4	2	CC	61.59	C	59.38	B	70.39	BB	77.52	C37	铁路、船舶、航空航天和其它运输设备制造业	广东省	440000	深圳市	440300
000019	深深宝A	2009	1	3	CCC	66.42	C	47.5	C	53.04	A	85.09	C15	酒、饮料和精制茶制造业	广东省	440000	深圳市	440300
000019	深深宝A	2009	2	4	B	72.37	C	52.87	B	70.68	BBB	83.46	C15	酒、饮料和精制茶制造业	广东省	440000	深圳市	440300
000019	深深宝A	2009	3	4	B	72.74	C	52.87	B	70.68	BBB	84.28	C15	酒、饮料和精制茶制造业	广东省	440000	深圳市	440300
000019	深深宝A	2009	4	4	B	73.12	C	52.87	B	70.68	A	85.09	C15	酒、饮料和精制茶制造业	广东省	440000	深圳市	440300
000019	深深宝A	2010	1	4	B	73.12	C	52.87	B	70.68	A	85.09	C15	酒、饮料和精制茶制造业	广东省	440000	深圳市	440300
000019	深深宝A	2010	2	4	B	70.38	C	52.87	CCC	67.77	BBB	81.08	C15	酒、饮料和精制茶制造业	广东省	440000	深圳市	440300
000019	深深宝A	2010	3	4	B	70.76	C	52.87	CCC	67.77	BBB	81.9	C15	酒、饮料和精制茶制造业	广东省	440000	深圳市	440300
000019	深深宝A	2010	4	4	B	70.38	C	52.87	CCC	67.77	BBB	81.08	C15	酒、饮料和精制茶制造业	广东省	440000	深圳市	440300
000019	深深宝A	2011	1	4	B	70.38	C	52.87	CCC	67.77	BBB	81.08	C15	酒、饮料和精制茶制造业	广东省	440000	深圳市	440300
000019	深深宝A	2011	2	4	B	74.75	C	56.03	BB	76.01	BBB	83.46	C15	酒、饮料和精制茶制造业	广东省	440000	深圳市	440300
000019	深深宝A	2011	3	4	B	74.75	C	56.03	BB	76.01	BBB	83.46	C15	酒、饮料和精制茶制造业	广东省	440000	深圳市	440300
000019	深深宝A	2011	4	5	BB	75.88	C	56.03	BB	76.01	A	85.91	C15	酒、饮料和精制茶制造业	广东省	440000	深圳市	440300
000019	深深宝A	2012	1	5	BB	75.88	C	56.03	BB	76.01	A	85.91	C15	酒、饮料和精制茶制造业	广东省	440000	深圳市	440300
000019	深深宝A	2012	2	4	B	74.91	C	56.03	B	72.9	A	85.91	C15	酒、饮料和精制茶制造业	广东省	440000	深圳市	440300
000019	深深宝A	2012	3	4	B	73.79	C	56.03	B	72.9	BBB	83.46	C15	酒、饮料和精制茶制造业	广东省	440000	深圳市	440300
000019	深深宝A	2012	4	4	B	74.43	C	56.03	B	73.76	BBB	84.28	C15	酒、饮料和精制茶制造业	广东省	440000	深圳市	440300
000019	深深宝A	2013	1	4	B	74.05	C	56.03	B	73.76	BBB	83.46	C15	酒、饮料和精制茶制造业	广东省	440000	深圳市	440300
000019	深深宝A	2013	2	4	B	74.05	C	56.03	B	73.76	BBB	83.46	C15	酒、饮料和精制茶制造业	广东省	440000	深圳市	440300
000019	深深宝A	2013	3	4	B	74.43	C	56.03	B	73.76	BBB	84.28	C15	酒、饮料和精制茶制造业	广东省	440000	深圳市	440300
000019	深深宝A	2013	4	4	B	74.16	C	56.03	B	72.9	BBB	84.28	C15	酒、饮料和精制茶制造业	广东省	440000	深圳市	440300
000019	深深宝A	2014	1	4	B	74.54	C	56.03	B	72.9	A	85.09	C15	酒、饮料和精制茶制造业	广东省	440000	深圳市	440300
000019	深深宝A	2014	2	4	B	72.12	C	56.03	CCC	67.51	BBB	83.46	C15	酒、饮料和精制茶制造业	广东省	440000	深圳市	440300
000019	深深宝A	2014	3	4	B	71.75	C	56.03	CCC	67.51	BBB	82.64	C15	酒、饮料和精制茶制造业	广东省	440000	深圳市	440300
000019	深深宝A	2014	4	4	B	72.58	C	56.03	CCC	67.51	BBB	84.45	C15	酒、饮料和精制茶制造业	广东省	440000	深圳市	440300
000019	深深宝A	2015	1	4	B	72.5	C	56.03	CCC	67.51	BBB	84.28	C15	酒、饮料和精制茶制造业	广东省	440000	深圳市	440300
000019	深深宝A	2015	2	3	CCC	69.9	C	56.03	C	59.1	BBB	84.28	C15	酒、饮料和精制茶制造业	广东省	440000	深圳市	440300
000019	深深宝A	2015	3	4	B	70.28	C	56.03	C	59.1	A	85.09	C15	酒、饮料和精制茶制造业	广东省	440000	深圳市	440300
000019	深深宝A	2015	4	4	B	70.28	C	56.03	C	59.1	A	85.09	C15	酒、饮料和精制茶制造业	广东省	440000	深圳市	440300
000019	深深宝A	2016	1	4	B	70.28	C	56.03	C	59.1	A	85.09	C15	酒、饮料和精制茶制造业	广东省	440000	深圳市	440300
000019	深深宝A	2016	2	3	CCC	69.59	C	54.45	CC	62.8	BBB	81.9	C15	酒、饮料和精制茶制造业	广东省	440000	深圳市	440300
000019	深深宝A	2016	3	3	CCC	69.22	C	54.45	CC	62.8	BBB	81.08	C15	酒、饮料和精制茶制造业	广东省	440000	深圳市	440300
000019	深深宝A	2016	4	3	CCC	69.59	C	54.45	CC	62.8	BBB	81.9	C15	酒、饮料和精制茶制造业	广东省	440000	深圳市	440300
000019	深深宝A	2017	1	3	CCC	69.59	C	54.45	CC	62.8	BBB	81.9	C15	酒、饮料和精制茶制造业	广东省	440000	深圳市	440300
000019	深深宝A	2017	2	3	CCC	68.33	C	50.79	C	56.75	A	85.09	C15	酒、饮料和精制茶制造业	广东省	440000	深圳市	440300
000019	深深宝A	2017	3	3	CCC	68.33	C	50.79	C	56.75	A	85.09	C15	酒、饮料和精制茶制造业	广东省	440000	深圳市	440300
000019	深深宝A	2017	4	3	CCC	68.33	C	50.79	C	56.75	A	85.09	C15	酒、饮料和精制茶制造业	广东省	440000	深圳市	440300
000019	深粮控股	2018	1	3	CCC	68.33	C	50.79	C	56.75	A	85.09	C15	酒、饮料和精制茶制造业	广东省	440000	深圳市	440300
000019	深粮控股	2018	2	3	CCC	69.71	C	50.79	CC	63	BBB	83.89	C15	酒、饮料和精制茶制造业	广东省	440000	深圳市	440300
000019	深粮控股	2018	3	3	CCC	67.8	C	50.79	CC	63	BB	79.72	C15	酒、饮料和精制茶制造业	广东省	440000	深圳市	440300
000019	深粮控股	2018	4	3	CCC	67.8	C	50.79	CC	63	BB	79.72	C15	酒、饮料和精制茶制造业	广东省	440000	深圳市	440300
000019	深粮控股	2019	1	4	B	71.3	C	55.72	BB	75.58	BB	76.55	F51	批发业	广东省	440000	深圳市	440300
000019	深粮控股	2019	2	4	B	74.36	C	46.26	AAA	100	BB	77.95	F51	批发业	广东省	440000	深圳市	440300
000019	深粮控股	2019	3	4	B	74.36	C	46.26	AAA	100	BB	77.95	F51	批发业	广东省	440000	深圳市	440300
000019	深粮控股	2019	4	4	B	74.36	C	46.26	AAA	100	BB	77.95	F51	批发业	广东省	440000	深圳市	440300
000019	深粮控股	2020	1	4	B	74.36	C	46.26	AAA	100	BB	77.95	F51	批发业	广东省	440000	深圳市	440300
000019	深粮控股	2020	2	4	B	73.84	C	46.26	AAA	95.12	BB	78.64	F51	批发业	广东省	440000	深圳市	440300
000019	深粮控股	2020	3	4	B	73.84	C	46.26	AAA	95.12	BB	78.64	F51	批发业	广东省	440000	深圳市	440300
000019	深粮控股	2020	4	4	B	73.84	C	46.26	AAA	95.12	BB	78.64	F51	批发业	广东省	440000	深圳市	440300
000019	深粮控股	2021	1	4	B	73.84	C	46.26	AAA	95.12	BB	78.64	F51	批发业	广东省	440000	深圳市	440300
000019	深粮控股	2021	2	4	B	72.05	C	59.07	BB	76.64	BBB	82.31	F51	批发业	广东省	440000	深圳市	440300
000019	深粮控股	2021	3	4	B	72.16	C	59.07	BB	76.64	BBB	82.63	F51	批发业	广东省	440000	深圳市	440300
000019	深粮控股	2021	4	4	B	71.65	C	59.07	BB	76.64	BBB	81.25	F51	批发业	广东省	440000	深圳市	440300
000019	深粮控股	2022	1	4	B	71.77	C	59.07	BB	76.64	BBB	81.57	F51	批发业	广东省	440000	深圳市	440300
000019	深粮控股	2022	2	4	B	71.52	C	59.07	B	73.81	BBB	82.8	F51	批发业	广东省	440000	深圳市	440300
000019	深粮控股	2022	3	4	B	72.23	C	59.07	B	73.81	BBB	84.7	F51	批发业	广东省	440000	深圳市	440300
000019	深粮控股	2022	4	4	B	72.44	C	59.07	B	74.14	A	85.08	F51	批发业	广东省	440000	深圳市	440300
000019	深粮控股	2023	1	4	B	72.05	C	59.07	B	74.14	BBB	84.02	F51	批发业	广东省	440000	深圳市	440300
000019	深粮控股	2023	2	4	B	70.96	C	59.07	B	70.39	BBB	83.58	F51	批发业	广东省	440000	深圳市	440300
000019	深粮控股	2023	3	4	B	70.96	C	59.07	B	70.39	BBB	83.58	F51	批发业	广东省	440000	深圳市	440300
000019	深粮控股	2023	4	3	CCC	69.78	C	59.07	B	70.39	BBB	80.4	F51	批发业	广东省	440000	深圳市	440300
000019	深粮控股	2024	1	3	CCC	69.19	C	59.07	B	70.39	BB	78.81	F51	批发业	广东省	440000	深圳市	440300
000019	深粮控股	2024	2	2	CC	62.65	C	58.72	B	71.33	BB	79.36	F51	批发业	广东省	440000	深圳市	440300
000019	深粮控股	2024	3	3	CCC	65.81	CC	61.88	B	71.24	BBB	80.01	F51	批发业	广东省	440000	深圳市	440300
000019	深粮控股	2024	4	4	B	70.01	C	58.58	BB	78.02	BBB	84.42	F51	批发业	广东省	440000	深圳市	440300
000020	深华发A	2009	1	4	B	70.18	C	45.76	CC	64.8	A	86.27	C39	计算机、通信和其他电子设备制造业	广东省	440000	深圳市	440300
000020	深华发A	2009	2	5	BB	75.99	CC	63.1	BB	75.89	BBB	82.64	C39	计算机、通信和其他电子设备制造业	广东省	440000	深圳市	440300
000020	深华发A	2009	3	5	BB	76.74	CC	63.1	BB	75.89	BBB	84.28	C39	计算机、通信和其他电子设备制造业	广东省	440000	深圳市	440300
000020	深华发A	2009	4	5	BB	76.9	CC	63.1	BB	75.89	BBB	84.63	C39	计算机、通信和其他电子设备制造业	广东省	440000	深圳市	440300
000020	深华发A	2010	1	5	BB	77.81	CC	63.1	BB	75.89	A	86.63	C39	计算机、通信和其他电子设备制造业	广东省	440000	深圳市	440300
000020	深华发A	2010	2	3	CCC	68.05	CC	61.52	C	55.53	BB	79.82	C39	计算机、通信和其他电子设备制造业	广东省	440000	深圳市	440300
000020	深华发A	2010	3	3	CCC	67.51	CC	61.52	C	55.53	BB	78.65	C39	计算机、通信和其他电子设备制造业	广东省	440000	深圳市	440300
000020	深华发A	2010	4	3	CCC	69.87	CC	61.52	C	55.53	BBB	83.81	C39	计算机、通信和其他电子设备制造业	广东省	440000	深圳市	440300
000020	深华发A	2011	1	3	CCC	69.87	CC	61.52	C	55.53	BBB	83.81	C39	计算机、通信和其他电子设备制造业	广东省	440000	深圳市	440300
000020	深华发A	2011	2	3	CCC	66.39	C	49.35	CC	62.58	BB	77.65	C39	计算机、通信和其他电子设备制造业	广东省	440000	深圳市	440300
000020	深华发A	2011	3	3	CCC	66.39	C	49.35	CC	62.58	BB	77.65	C39	计算机、通信和其他电子设备制造业	广东省	440000	深圳市	440300
000020	深华发A	2011	4	3	CCC	67.75	C	49.35	CC	62.58	BBB	80.64	C39	计算机、通信和其他电子设备制造业	广东省	440000	深圳市	440300
000020	深华发A	2012	1	3	CCC	67.38	C	49.35	CC	62.58	BB	79.82	C39	计算机、通信和其他电子设备制造业	广东省	440000	深圳市	440300
000020	深华发A	2012	2	3	CCC	65.24	C	54.3	C	55.39	BB	77.47	C39	计算机、通信和其他电子设备制造业	广东省	440000	深圳市	440300
000020	深华发A	2012	3	2	CC	63.37	C	54.3	C	55.39	B	73.38	C39	计算机、通信和其他电子设备制造业	广东省	440000	深圳市	440300
000020	深华发A	2012	4	2	CC	63.74	C	54.3	C	55.39	B	74.2	C39	计算机、通信和其他电子设备制造业	广东省	440000	深圳市	440300
000020	深华发	2013	1	2	CC	63.74	C	54.3	C	55.39	B	74.2	C39	计算机、通信和其他电子设备制造业	广东省	440000	深圳市	440300
000020	深华发	2013	2	3	CCC	65.17	C	54.3	CC	62.45	B	72.56	C39	计算机、通信和其他电子设备制造业	广东省	440000	深圳市	440300
000020	深华发	2013	3	3	CCC	65.54	C	54.3	CC	62.45	B	73.38	C39	计算机、通信和其他电子设备制造业	广东省	440000	深圳市	440300
000020	深华发	2013	4	3	CCC	65.63	C	54.3	CC	62.45	B	73.56	C39	计算机、通信和其他电子设备制造业	广东省	440000	深圳市	440300
000020	深华发A	2014	1	3	CCC	65.63	C	54.3	CC	62.45	B	73.56	C39	计算机、通信和其他电子设备制造业	广东省	440000	深圳市	440300
000020	深华发A	2014	2	2	CC	61.6	C	51.14	C	57.74	CCC	69.54	C39	计算机、通信和其他电子设备制造业	广东省	440000	深圳市	440300
000020	深华发A	2014	3	2	CC	61.6	C	51.14	C	57.74	CCC	69.54	C39	计算机、通信和其他电子设备制造业	广东省	440000	深圳市	440300
000020	深华发A	2014	4	2	CC	64.22	C	51.14	C	57.74	BB	75.27	C39	计算机、通信和其他电子设备制造业	广东省	440000	深圳市	440300
000020	深华发A	2015	1	2	CC	62.35	C	51.14	C	57.74	B	71.18	C39	计算机、通信和其他电子设备制造业	广东省	440000	深圳市	440300
000020	深华发A	2015	2	3	CCC	67.31	C	50.93	CCC	65.07	BB	77.19	C39	计算机、通信和其他电子设备制造业	广东省	440000	深圳市	440300
000020	深华发A	2015	3	3	CCC	67.68	C	50.93	CCC	65.07	BB	78.01	C39	计算机、通信和其他电子设备制造业	广东省	440000	深圳市	440300
000020	深华发A	2015	4	3	CCC	68.52	C	50.93	CCC	65.07	BB	79.82	C39	计算机、通信和其他电子设备制造业	广东省	440000	深圳市	440300
000020	深华发A	2016	1	3	CCC	67.6	C	50.93	CCC	65.07	BB	77.83	C39	计算机、通信和其他电子设备制造业	广东省	440000	深圳市	440300
000020	深华发A	2016	2	2	CC	62.46	C	50.93	C	59.92	B	70.07	C39	计算机、通信和其他电子设备制造业	广东省	440000	深圳市	440300
000020	深华发A	2016	3	2	CC	62.46	C	50.93	C	59.92	B	70.07	C39	计算机、通信和其他电子设备制造业	广东省	440000	深圳市	440300
000020	深华发A	2016	4	1	C	54.76	C	50.93	C	59.92	C	53.22	C39	计算机、通信和其他电子设备制造业	广东省	440000	深圳市	440300
000020	深华发A	2017	1	1	C	52.88	C	50.93	C	59.92	C	49.13	C39	计算机、通信和其他电子设备制造业	广东省	440000	深圳市	440300
000020	深华发A	2017	2	1	C	56.25	C	52.31	CC	64.8	C	52.5	C39	计算机、通信和其他电子设备制造业	广东省	440000	深圳市	440300
000020	深华发A	2017	3	1	C	56.25	C	52.31	CC	64.8	C	52.5	C39	计算机、通信和其他电子设备制造业	广东省	440000	深圳市	440300
000020	深华发A	2017	4	1	C	57.32	C	52.31	CCC	68.24	C	52.5	C39	计算机、通信和其他电子设备制造业	广东省	440000	深圳市	440300
000020	深华发A	2018	1	2	CC	62.07	C	52.31	CCC	68.24	CC	62.89	C39	计算机、通信和其他电子设备制造业	广东省	440000	深圳市	440300
000020	深华发A	2018	2	2	CC	60.6	C	47.54	CCC	65.89	CC	63.71	C39	计算机、通信和其他电子设备制造业	广东省	440000	深圳市	440300
000020	深华发A	2018	3	2	CC	61.1	C	47.54	CCC	65.89	CC	64.8	C39	计算机、通信和其他电子设备制造业	广东省	440000	深圳市	440300
000020	深华发A	2018	4	2	CC	61.56	C	47.54	CCC	65.89	CCC	65.79	C39	计算机、通信和其他电子设备制造业	广东省	440000	深圳市	440300
000020	深华发A	2019	1	2	CC	62.87	C	47.54	CCC	65.89	CCC	68.67	C39	计算机、通信和其他电子设备制造业	广东省	440000	深圳市	440300
000020	深华发A	2019	2	2	CC	61.6	C	47.15	CC	63.54	CCC	67.67	C39	计算机、通信和其他电子设备制造业	广东省	440000	深圳市	440300
000020	深华发A	2019	3	2	CC	61.6	C	47.15	CC	63.54	CCC	67.67	C39	计算机、通信和其他电子设备制造业	广东省	440000	深圳市	440300
000020	深华发A	2019	4	2	CC	61.97	C	47.15	CC	63.54	CCC	68.49	C39	计算机、通信和其他电子设备制造业	广东省	440000	深圳市	440300
000020	深华发A	2020	1	2	CC	63.29	C	47.15	CC	63.54	B	71.36	C39	计算机、通信和其他电子设备制造业	广东省	440000	深圳市	440300
000020	深华发A	2020	2	2	CC	62.94	C	47.15	CC	61.18	B	72.18	C39	计算机、通信和其他电子设备制造业	广东省	440000	深圳市	440300
000020	深华发A	2020	3	2	CC	63.94	C	47.15	CC	61.18	B	74.36	C39	计算机、通信和其他电子设备制造业	广东省	440000	深圳市	440300
000020	深华发A	2020	4	2	CC	64.39	C	47.15	CC	61.18	BB	75.36	C39	计算机、通信和其他电子设备制造业	广东省	440000	深圳市	440300
000020	深华发A	2021	1	3	CCC	66.27	C	47.15	CC	61.18	BB	79.46	C39	计算机、通信和其他电子设备制造业	广东省	440000	深圳市	440300
000020	深华发A	2021	2	4	B	72.66	CCC	67.11	CCC	68.37	BB	78.64	C39	计算机、通信和其他电子设备制造业	广东省	440000	深圳市	440300
000020	深华发A	2021	3	4	B	71.15	CCC	67.11	CCC	68.37	BB	75.25	C39	计算机、通信和其他电子设备制造业	广东省	440000	深圳市	440300
000020	深华发A	2021	4	4	B	70.31	CCC	67.11	CCC	68.37	B	73.37	C39	计算机、通信和其他电子设备制造业	广东省	440000	深圳市	440300
000020	深华发A	2022	1	4	B	70.31	CCC	67.11	CCC	68.37	B	73.37	C39	计算机、通信和其他电子设备制造业	广东省	440000	深圳市	440300
000020	深华发A	2022	2	4	B	70.69	CCC	67.11	CCC	68.97	B	73.81	C39	计算机、通信和其他电子设备制造业	广东省	440000	深圳市	440300
000020	深华发A	2022	3	4	B	70.69	CCC	67.11	CCC	68.97	B	73.81	C39	计算机、通信和其他电子设备制造业	广东省	440000	深圳市	440300
000020	深华发A	2022	4	4	B	71.54	CCC	67.11	CCC	68.97	BB	75.69	C39	计算机、通信和其他电子设备制造业	广东省	440000	深圳市	440300
000020	深华发A	2023	1	3	CCC	68.21	CCC	67.11	CCC	68.97	CCC	68.22	C39	计算机、通信和其他电子设备制造业	广东省	440000	深圳市	440300
000020	深华发A	2023	2	3	CCC	67.45	CCC	67.11	CCC	66.87	CCC	68.05	C39	计算机、通信和其他电子设备制造业	广东省	440000	深圳市	440300
000020	深华发A	2023	3	3	CCC	67.45	CCC	67.11	CCC	66.87	CCC	68.05	C39	计算机、通信和其他电子设备制造业	广东省	440000	深圳市	440300
000020	深华发A	2023	4	3	CCC	65.08	CC	64.19	CCC	66.87	CC	64.26	C39	计算机、通信和其他电子设备制造业	广东省	440000	深圳市	440300
000020	深华发A	2024	1	3	CCC	66.99	CCC	67.11	CCC	66.87	CCC	67	C39	计算机、通信和其他电子设备制造业	广东省	440000	深圳市	440300
000020	深华发A	2024	2	2	CC	64.22	CCC	66	B	70.03	CCC	65.42	C39	计算机、通信和其他电子设备制造业	广东省	440000	深圳市	440300
000020	深华发A	2024	3	1	C	54.52	B	70.44	B	70.35	CC	63.09	C39	计算机、通信和其他电子设备制造业	广东省	440000	深圳市	440300
000020	深华发A	2024	4	1	C	52.72	CC	64.19	B	70.03	CC	63.98	C39	计算机、通信和其他电子设备制造业	广东省	440000	深圳市	440300
000021	长城开发	2009	1	4	B	71.98	C	55.54	CCC	67.93	BBB	83.1	C39	计算机、通信和其他电子设备制造业	广东省	440000	深圳市	440300
000021	长城开发	2009	2	4	B	72.68	C	55.88	CCC	69.96	BBB	83.1	C39	计算机、通信和其他电子设备制造业	广东省	440000	深圳市	440300
000021	长城开发	2009	3	4	B	72.68	C	55.88	CCC	69.96	BBB	83.1	C39	计算机、通信和其他电子设备制造业	广东省	440000	深圳市	440300
000021	长城开发	2009	4	4	B	74.24	C	55.88	B	70.82	A	85.91	C39	计算机、通信和其他电子设备制造业	广东省	440000	深圳市	440300
000021	长城开发	2010	1	4	B	74.24	C	55.88	B	70.82	A	85.91	C39	计算机、通信和其他电子设备制造业	广东省	440000	深圳市	440300
000021	长城开发	2010	2	4	B	73.6	C	55.88	CCC	69.96	A	85.09	C39	计算机、通信和其他电子设备制造业	广东省	440000	深圳市	440300
000021	长城开发	2010	3	4	B	73.6	C	55.88	CCC	69.96	A	85.09	C39	计算机、通信和其他电子设备制造业	广东省	440000	深圳市	440300
000021	长城开发	2010	4	5	BB	75.25	CC	62.93	CCC	69.96	A	85.09	C39	计算机、通信和其他电子设备制造业	广东省	440000	深圳市	440300
000021	长城开发	2011	1	4	B	74.87	CC	62.93	CCC	69.96	BBB	84.28	C39	计算机、通信和其他电子设备制造业	广东省	440000	深圳市	440300
000021	长城开发	2011	2	5	BB	78.64	B	70.5	BB	76.81	BBB	84.02	C39	计算机、通信和其他电子设备制造业	广东省	440000	深圳市	440300
000021	长城开发	2011	3	5	BB	78.64	B	70.5	BB	76.81	BBB	84.02	C39	计算机、通信和其他电子设备制造业	广东省	440000	深圳市	440300
000021	长城开发	2011	4	5	BB	79.39	B	70.5	BB	76.81	A	85.66	C39	计算机、通信和其他电子设备制造业	广东省	440000	深圳市	440300
000021	长城开发	2012	1	5	BB	79.01	B	70.5	BB	76.81	BBB	84.84	C39	计算机、通信和其他电子设备制造业	广东省	440000	深圳市	440300
000021	长城开发	2012	2	5	BB	78.53	B	70.5	BB	75.25	BBB	84.84	C39	计算机、通信和其他电子设备制造业	广东省	440000	深圳市	440300
000021	长城开发	2012	3	5	BB	78.53	B	70.5	BB	75.25	BBB	84.84	C39	计算机、通信和其他电子设备制造业	广东省	440000	深圳市	440300
000021	长城开发	2012	4	5	BB	79.66	B	70.5	BB	78.92	BBB	84.84	C39	计算机、通信和其他电子设备制造业	广东省	440000	深圳市	440300
000021	长城开发	2013	1	5	BB	79.29	B	70.5	BB	78.92	BBB	84.02	C39	计算机、通信和其他电子设备制造业	广东省	440000	深圳市	440300
000021	长城开发	2013	2	5	BB	78.38	CCC	67.13	B	74.45	A	86.78	C39	计算机、通信和其他电子设备制造业	广东省	440000	深圳市	440300
000021	长城开发	2013	3	5	BB	77.32	CCC	67.13	B	71.01	A	86.78	C39	计算机、通信和其他电子设备制造业	广东省	440000	深圳市	440300
000021	长城开发	2013	4	5	BB	77.69	CCC	67.13	B	71.01	A	87.6	C39	计算机、通信和其他电子设备制造业	广东省	440000	深圳市	440300
000021	深科技	2014	1	5	BB	79.22	CCC	67.13	B	74.73	A	88.42	C39	计算机、通信和其他电子设备制造业	广东省	440000	深圳市	440300
000021	深科技	2014	2	5	BB	77.12	CCC	65.34	BB	75.82	BBB	84.02	C39	计算机、通信和其他电子设备制造业	广东省	440000	深圳市	440300
000021	深科技	2014	3	5	BB	76.06	CCC	65.34	B	72.38	BBB	84.02	C39	计算机、通信和其他电子设备制造业	广东省	440000	深圳市	440300
000021	深科技	2014	4	5	BB	76.44	CCC	65.34	B	72.38	BBB	84.84	C39	计算机、通信和其他电子设备制造业	广东省	440000	深圳市	440300
000021	深科技	2015	1	5	BB	76.44	CCC	65.34	B	72.38	BBB	84.84	C39	计算机、通信和其他电子设备制造业	广东省	440000	深圳市	440300
000021	深科技	2015	2	6	BBB	81.13	CCC	65.34	A	87.58	BBB	84.84	C39	计算机、通信和其他电子设备制造业	广东省	440000	深圳市	440300
000021	深科技	2015	3	6	BBB	80.07	CCC	65.34	BBB	84.14	BBB	84.84	C39	计算机、通信和其他电子设备制造业	广东省	440000	深圳市	440300
000021	深科技	2015	4	6	BBB	80.33	CCC	65.34	A	85	BBB	84.84	C39	计算机、通信和其他电子设备制造业	广东省	440000	深圳市	440300
000021	深科技	2016	1	6	BBB	80.33	CCC	65.34	A	85	BBB	84.84	C39	计算机、通信和其他电子设备制造业	广东省	440000	深圳市	440300
000021	深科技	2016	2	6	BBB	81.44	CCC	67.13	A	88.44	BBB	84.02	C39	计算机、通信和其他电子设备制造业	广东省	440000	深圳市	440300
000021	深科技	2016	3	6	BBB	80.75	CCC	67.13	A	85	BBB	84.84	C39	计算机、通信和其他电子设备制造业	广东省	440000	深圳市	440300
000021	深科技	2016	4	6	BBB	81.37	B	71.37	A	85	BBB	84.02	C39	计算机、通信和其他电子设备制造业	广东省	440000	深圳市	440300
000021	深科技	2017	1	6	BBB	82.52	B	71.37	A	88.73	BBB	84.02	C39	计算机、通信和其他电子设备制造业	广东省	440000	深圳市	440300
000021	深科技	2017	2	6	BBB	81.55	CCC	65.42	AA	91.31	BBB	83.2	C39	计算机、通信和其他电子设备制造业	广东省	440000	深圳市	440300
000021	深科技	2017	3	6	BBB	81.92	CCC	65.42	AA	91.31	BBB	84.02	C39	计算机、通信和其他电子设备制造业	广东省	440000	深圳市	440300
000021	深科技	2017	4	6	BBB	81.92	CCC	65.42	AA	91.31	BBB	84.02	C39	计算机、通信和其他电子设备制造业	广东省	440000	深圳市	440300
000021	深科技	2018	1	6	BBB	81.55	CCC	65.42	AA	91.31	BBB	83.2	C39	计算机、通信和其他电子设备制造业	广东省	440000	深圳市	440300
000021	深科技	2018	2	5	BB	78.24	CC	64.05	BBB	80.41	BBB	84.02	C39	计算机、通信和其他电子设备制造业	广东省	440000	深圳市	440300
000021	深科技	2018	3	5	BB	76.63	CC	64.05	BB	76.97	BBB	82.83	C39	计算机、通信和其他电子设备制造业	广东省	440000	深圳市	440300
000021	深科技	2018	4	5	BB	77.07	CC	64.05	BB	79.87	BBB	81.83	C39	计算机、通信和其他电子设备制造业	广东省	440000	深圳市	440300
000021	深科技	2019	1	5	BB	77.53	CC	64.05	BB	79.87	BBB	82.83	C39	计算机、通信和其他电子设备制造业	广东省	440000	深圳市	440300
000021	深科技	2019	2	5	BB	78.5	CCC	65.63	BBB	83.31	BBB	81.83	C39	计算机、通信和其他电子设备制造业	广东省	440000	深圳市	440300
000021	深科技	2019	3	5	BB	77.44	CCC	65.63	BB	79.87	BBB	81.83	C39	计算机、通信和其他电子设备制造业	广东省	440000	深圳市	440300
000021	深科技	2019	4	5	BB	77.44	CCC	65.63	BB	79.87	BBB	81.83	C39	计算机、通信和其他电子设备制造业	广东省	440000	深圳市	440300
000021	深科技	2020	1	5	BB	75.92	CCC	65.63	BB	77.39	BBB	80.2	C39	计算机、通信和其他电子设备制造业	广东省	440000	深圳市	440300
000021	深科技	2020	2	6	BBB	82.54	B	71.18	AA	91.73	BBB	82.14	C39	计算机、通信和其他电子设备制造业	广东省	440000	深圳市	440300
000021	深科技	2020	3	6	BBB	82.22	B	71.18	A	88.28	BBB	83.78	C39	计算机、通信和其他电子设备制造业	广东省	440000	深圳市	440300
000021	深科技	2020	4	6	BBB	82.6	B	71.18	A	88.28	BBB	84.59	C39	计算机、通信和其他电子设备制造业	广东省	440000	深圳市	440300
000021	深科技	2021	1	6	BBB	83.05	B	71.18	A	88.28	A	85.59	C39	计算机、通信和其他电子设备制造业	广东省	440000	深圳市	440300
000021	深科技	2021	2	5	BB	76.19	CCC	67.92	BB	78.58	BB	78.75	C39	计算机、通信和其他电子设备制造业	广东省	440000	深圳市	440300
000021	深科技	2021	3	5	BB	76.84	CCC	67.92	BB	78.58	BBB	80.34	C39	计算机、通信和其他电子设备制造业	广东省	440000	深圳市	440300
000021	深科技	2021	4	5	BB	77.58	CCC	67.92	BB	78.58	BBB	82.14	C39	计算机、通信和其他电子设备制造业	广东省	440000	深圳市	440300
000021	深科技	2022	1	5	BB	76.93	CCC	67.92	BB	78.58	BBB	80.55	C39	计算机、通信和其他电子设备制造业	广东省	440000	深圳市	440300
000021	深科技	2022	2	5	BB	77.02	CCC	68.39	BB	78.82	BBB	80.31	C39	计算机、通信和其他电子设备制造业	广东省	440000	深圳市	440300
000021	深科技	2022	3	5	BB	77.02	CCC	68.39	BB	78.82	BBB	80.31	C39	计算机、通信和其他电子设备制造业	广东省	440000	深圳市	440300
000021	深科技	2022	4	5	BB	77.3	CCC	68.39	BB	78.82	BBB	80.98	C39	计算机、通信和其他电子设备制造业	广东省	440000	深圳市	440300
000021	深科技	2023	1	5	BB	78.09	CCC	68.38	BB	78.01	BBB	83.63	C39	计算机、通信和其他电子设备制造业	广东省	440000	深圳市	440300
000021	深科技	2023	2	5	BB	78.7	CCC	68.85	BB	79.69	BBB	83.39	C39	计算机、通信和其他电子设备制造业	广东省	440000	深圳市	440300
000021	深科技	2023	3	5	BB	79.22	CCC	68.85	BBB	80.41	BBB	84.02	C39	计算机、通信和其他电子设备制造业	广东省	440000	深圳市	440300
000021	深科技	2023	4	5	BB	78.49	CCC	68.85	BB	79.59	BBB	82.96	C39	计算机、通信和其他电子设备制造业	广东省	440000	深圳市	440300
000021	深科技	2024	1	5	BB	79.32	CCC	68.85	BB	79.59	BBB	84.98	C39	计算机、通信和其他电子设备制造业	广东省	440000	深圳市	440300
000021	深科技	2024	2	7	A	85.51	BB	77.1	A	87.04	A	85.83	C39	计算机、通信和其他电子设备制造业	广东省	440000	深圳市	440300
000021	深科技	2024	3	8	AA	90.23	BB	79.87	A	88.75	A	87.36	C39	计算机、通信和其他电子设备制造业	广东省	440000	深圳市	440300
000021	深科技	2024	4	7	A	87.74	BB	76.79	A	88.22	A	87.15	C39	计算机、通信和其他电子设备制造业	广东省	440000	深圳市	440300
000023	深天地A	2009	1	3	CCC	69.79	C	57.12	CCC	65.29	BB	79.29	E47	房屋建筑业	广东省	440000	深圳市	440300
000023	深天地A	2009	2	3	CCC	68.88	C	48.59	B	72.45	BB	76.83	E47	房屋建筑业	广东省	440000	深圳市	440300
000023	深天地A	2009	3	3	CCC	68.88	C	48.59	B	72.45	BB	76.83	E47	房屋建筑业	广东省	440000	深圳市	440300
000023	深天地A	2009	4	3	CCC	68.88	C	48.59	B	72.45	BB	76.83	E47	房屋建筑业	广东省	440000	深圳市	440300
000023	深天地A	2010	1	3	CCC	68.88	C	48.59	B	72.45	BB	76.83	E47	房屋建筑业	广东省	440000	深圳市	440300
000023	深天地A	2010	2	3	CCC	67.87	C	56.78	CC	62.71	BB	77.01	E47	房屋建筑业	广东省	440000	深圳市	440300
000023	深天地A	2010	3	3	CCC	68.26	C	56.78	CC	63.96	BB	77.01	E47	房屋建筑业	广东省	440000	深圳市	440300
000023	深天地A	2010	4	3	CCC	68.26	C	56.78	CC	63.96	BB	77.01	E47	房屋建筑业	广东省	440000	深圳市	440300
000023	深天地A	2011	1	3	CCC	66.76	C	56.78	CC	63.96	B	73.73	E47	房屋建筑业	广东省	440000	深圳市	440300
000023	深天地A	2011	2	4	B	70.33	C	45.76	BB	76.17	BB	78.92	E47	房屋建筑业	广东省	440000	深圳市	440300
000023	深天地A	2011	3	4	B	71.83	C	45.76	BB	76.17	BBB	82.2	E47	房屋建筑业	广东省	440000	深圳市	440300
000023	深天地A	2011	4	4	B	70.91	C	45.76	BB	76.17	BBB	80.21	E47	房屋建筑业	广东省	440000	深圳市	440300
000023	深天地A	2012	1	4	B	70.91	C	45.76	BB	76.17	BBB	80.21	C30	非金属矿物制品业	广东省	440000	深圳市	440300
000023	深天地A	2012	2	3	CCC	68.71	C	58.7	CCC	66.67	BB	75.19	C30	非金属矿物制品业	广东省	440000	深圳市	440300
000023	深天地A	2012	3	3	CCC	67.58	C	58.7	CCC	66.67	B	72.74	C30	非金属矿物制品业	广东省	440000	深圳市	440300
000023	深天地A	2012	4	3	CCC	67.58	C	58.7	CCC	66.67	B	72.74	C30	非金属矿物制品业	广东省	440000	深圳市	440300
000023	深天地A	2013	1	3	CCC	66.83	C	58.7	CCC	66.67	B	71.1	C30	非金属矿物制品业	广东省	440000	深圳市	440300
000023	深天地A	2013	2	2	CC	64.7	C	45.76	CCC	68.66	B	71.69	C30	非金属矿物制品业	广东省	440000	深圳市	440300
000023	深天地A	2013	3	2	CC	64.7	C	45.76	CCC	68.66	B	71.69	C30	非金属矿物制品业	广东省	440000	深圳市	440300
000023	深天地A	2013	4	2	CC	64.7	C	45.76	CCC	68.66	B	71.69	C30	非金属矿物制品业	广东省	440000	深圳市	440300
000023	深天地A	2014	1	2	CC	64.7	C	45.76	CCC	68.66	B	71.69	C30	非金属矿物制品业	广东省	440000	深圳市	440300
000023	深天地A	2014	2	3	CCC	66.83	C	52.51	B	70.47	B	71.69	C30	非金属矿物制品业	广东省	440000	深圳市	440300
000023	深天地A	2014	3	3	CCC	66.92	C	52.51	B	70.47	B	71.89	C30	非金属矿物制品业	广东省	440000	深圳市	440300
000023	深天地A	2014	4	3	CCC	67.84	C	52.51	B	70.47	B	73.89	C30	非金属矿物制品业	广东省	440000	深圳市	440300
000023	深天地A	2015	1	3	CCC	67.84	C	52.51	B	70.47	B	73.89	C30	非金属矿物制品业	广东省	440000	深圳市	440300
000023	深天地A	2015	2	3	CCC	68.94	C	52.51	B	72.82	B	74.7	C30	非金属矿物制品业	广东省	440000	深圳市	440300
000023	深天地A	2015	3	3	CCC	68.84	C	52.51	B	72.82	B	74.5	C30	非金属矿物制品业	广东省	440000	深圳市	440300
000023	深天地A	2015	4	3	CCC	69.59	C	52.51	B	72.82	BB	76.14	C30	非金属矿物制品业	广东省	440000	深圳市	440300
000023	深天地A	2016	1	1	C	59.16	C	52.51	B	72.82	C	53.34	C30	非金属矿物制品业	广东省	440000	深圳市	440300
000023	深天地A	2016	2	1	C	57.44	C	48.92	B	74.41	C	50.35	C30	非金属矿物制品业	广东省	440000	深圳市	440300
000023	深天地A	2016	3	1	C	56.48	C	48.92	B	70.68	C	50.76	C30	非金属矿物制品业	广东省	440000	深圳市	440300
000023	深天地A	2016	4	1	C	57.61	C	48.92	B	70.68	C	53.22	C30	非金属矿物制品业	广东省	440000	深圳市	440300
000023	深天地A	2017	1	2	CC	62.49	C	48.92	B	70.68	CC	63.89	C30	非金属矿物制品业	广东省	440000	深圳市	440300
000023	深天地A	2017	2	2	CC	61.75	C	53.89	CCC	65.75	CC	63.07	C30	非金属矿物制品业	广东省	440000	深圳市	440300
000023	深天地A	2017	3	2	CC	61.38	C	53.89	CCC	65.75	CC	62.25	C30	非金属矿物制品业	广东省	440000	深圳市	440300
000023	深天地A	2017	4	2	CC	63.04	C	53.89	CCC	65.75	CCC	65.88	C30	非金属矿物制品业	广东省	440000	深圳市	440300
000023	深天地A	2018	1	3	CCC	66.5	C	53.89	CCC	65.75	B	73.44	C30	非金属矿物制品业	广东省	440000	深圳市	440300
000023	深天地A	2018	2	3	CCC	68.01	C	57.26	CCC	68.1	B	73.44	C30	非金属矿物制品业	广东省	440000	深圳市	440300
000023	深天地A	2018	3	3	CCC	67.01	C	57.26	CCC	68.1	B	71.26	C30	非金属矿物制品业	广东省	440000	深圳市	440300
000023	深天地A	2018	4	3	CCC	67.01	C	57.26	CCC	68.1	B	71.26	C30	非金属矿物制品业	广东省	440000	深圳市	440300
000023	深天地A	2019	1	3	CCC	69.64	C	57.26	CCC	68.1	BB	77	C30	非金属矿物制品业	广东省	440000	深圳市	440300
000023	深天地A	2019	2	3	CCC	65.92	C	58.51	CC	62.94	B	71.73	C30	非金属矿物制品业	广东省	440000	深圳市	440300
000023	深天地A	2019	3	3	CCC	65.47	C	58.51	CC	62.94	B	70.73	C30	非金属矿物制品业	广东省	440000	深圳市	440300
000023	深天地A	2019	4	2	CC	61.12	C	58.51	CC	62.94	CC	61.24	C30	非金属矿物制品业	广东省	440000	深圳市	440300
000023	深天地A	2020	1	2	CC	61.12	C	58.51	CC	62.94	CC	61.24	C30	非金属矿物制品业	广东省	440000	深圳市	440300
000023	深天地A	2020	2	2	CC	62.28	CC	63.46	CC	62.94	CC	61.24	C30	非金属矿物制品业	广东省	440000	深圳市	440300
000023	深天地A	2020	3	2	CC	61.91	CC	63.46	CC	62.94	CC	60.42	C30	非金属矿物制品业	广东省	440000	深圳市	440300
000023	深天地A	2020	4	2	CC	63.54	CC	63.46	CC	62.94	CC	63.98	C30	非金属矿物制品业	广东省	440000	深圳市	440300
000023	深天地A	2021	1	2	CC	63.17	CC	61.88	CC	62.94	CC	63.98	C30	非金属矿物制品业	广东省	440000	深圳市	440300
000023	深天地A	2021	2	3	CCC	67.98	CC	61.85	BB	76.54	CCC	69.49	C30	非金属矿物制品业	广东省	440000	深圳市	440300
000023	深天地A	2021	3	3	CCC	67.98	CC	61.85	BB	76.54	CCC	69.49	C30	非金属矿物制品业	广东省	440000	深圳市	440300
000023	深天地A	2021	4	3	CCC	68.04	CC	61.85	BB	75.77	B	70.17	C30	非金属矿物制品业	广东省	440000	深圳市	440300
000023	深天地A	2022	1	3	CCC	68.04	CC	61.85	BB	75.77	B	70.17	C30	非金属矿物制品业	广东省	440000	深圳市	440300
000023	深天地A	2022	2	3	CCC	66.92	CC	61.85	B	74.22	CCC	68.03	C30	非金属矿物制品业	广东省	440000	深圳市	440300
000023	深天地A	2022	3	3	CCC	66.25	CC	61.85	B	74.22	CCC	66.12	C30	非金属矿物制品业	广东省	440000	深圳市	440300
000023	深天地A	2022	4	3	CCC	66.25	CC	61.85	B	74.22	CCC	66.12	C30	非金属矿物制品业	广东省	440000	深圳市	440300
000023	ST 深天	2023	1	3	CCC	66.25	CC	61.85	B	74.22	CCC	66.12	C30	非金属矿物制品业	广东省	440000	深圳市	440300
000023	ST 深天	2023	2	2	CC	61.47	CC	61.54	B	72.57	C	54.1	C30	非金属矿物制品业	广东省	440000	深圳市	440300
000023	ST 深天	2023	3	2	CC	61.47	CC	61.54	B	72.57	C	54.1	C30	非金属矿物制品业	广东省	440000	深圳市	440300
000023	ST 深天	2023	4	2	CC	60.46	CC	61.54	B	72.57	C	51.24	C30	非金属矿物制品业	广东省	440000	深圳市	440300
000023	*ST 深天	2024	1	2	CC	60.15	CC	61.54	B	72.57	C	50.36	C30	非金属矿物制品业	广东省	440000	深圳市	440300
000023	*ST 深天	2024	2	1	C	50	CC	62.16	B	73.34	C	49.42	C30	非金属矿物制品业	广东省	440000	深圳市	440300
000023	*ST 深天	2024	3	1	C	50	CC	64.06	B	71.17	C	50.16	C30	非金属矿物制品业	广东省	440000	深圳市	440300
000025	特力A	2009	1	4	B	73.78	C	47.58	A	85.35	BBB	81.19	S90	综合	广东省	440000	深圳市	440300
000025	特力A	2009	2	4	B	70.99	C	55.34	BB	75.58	BB	76.17	S90	综合	广东省	440000	深圳市	440300
000025	特力A	2009	3	4	B	70.99	C	55.34	BB	75.58	BB	76.17	S90	综合	广东省	440000	深圳市	440300
000025	特力A	2009	4	4	B	72.66	C	55.34	BB	75.58	BB	79.11	S90	综合	广东省	440000	深圳市	440300
000025	特力A	2010	1	4	B	72.66	C	55.34	BB	75.58	BB	79.11	F51	批发业	广东省	440000	深圳市	440300
000025	特力A	2010	2	4	B	71.42	C	53.35	BBB	80.46	BB	76.17	F51	批发业	广东省	440000	深圳市	440300
000025	特力A	2010	3	4	B	71.42	C	53.35	BBB	80.46	BB	76.17	F51	批发业	广东省	440000	深圳市	440300
000025	特力A	2010	4	4	B	73.09	C	53.35	BBB	80.46	BB	79.11	F51	批发业	广东省	440000	深圳市	440300
000025	特力A	2011	1	4	B	73.09	C	53.35	BBB	80.46	BB	79.11	F51	批发业	广东省	440000	深圳市	440300
000025	特力A	2011	2	4	B	72.74	C	55.34	BBB	80.46	BB	77.64	F51	批发业	广东省	440000	深圳市	440300
000025	特力A	2011	3	4	B	71.9	C	55.34	BBB	80.46	BB	76.17	F51	批发业	广东省	440000	深圳市	440300
000025	特力A	2011	4	4	B	71.9	C	55.34	BBB	80.46	BB	76.17	F51	批发业	广东省	440000	深圳市	440300
000025	特力A	2012	1	4	B	71.9	C	55.34	BBB	80.46	BB	76.17	F51	批发业	广东省	440000	深圳市	440300
000025	特力A	2012	2	4	B	72.59	C	55.34	BBB	80.46	BB	77.37	F51	批发业	广东省	440000	深圳市	440300
000025	特力A	2012	3	4	B	72.59	C	55.34	BBB	80.46	BB	77.37	F51	批发业	广东省	440000	深圳市	440300
000025	特力A	2012	4	4	B	70.92	C	55.34	BBB	80.46	B	74.44	F51	批发业	广东省	440000	深圳市	440300
000025	特力A	2013	1	4	B	70.92	C	55.34	BBB	80.46	B	74.44	F51	批发业	广东省	440000	深圳市	440300
000025	特力A	2013	2	4	B	73.48	C	55.25	A	85.35	BB	77.37	F51	批发业	广东省	440000	深圳市	440300
000025	特力A	2013	3	4	B	73.97	C	55.25	A	85.35	BB	78.24	F51	批发业	广东省	440000	深圳市	440300
000025	特力A	2013	4	4	B	73.97	C	55.25	A	85.35	BB	78.24	F51	批发业	广东省	440000	深圳市	440300
000025	特力A	2014	1	4	B	73.97	C	55.25	A	85.35	BB	78.24	F51	批发业	广东省	440000	深圳市	440300
000025	特力A	2014	2	4	B	74.46	C	57.23	A	85.35	BB	78.24	F51	批发业	广东省	440000	深圳市	440300
000025	特力A	2014	3	4	B	74.75	C	57.23	A	85.35	BB	78.76	F51	批发业	广东省	440000	深圳市	440300
000025	特力A	2014	4	4	B	74.75	C	57.23	A	85.35	BB	78.76	F51	批发业	广东省	440000	深圳市	440300
000025	特力A	2015	1	4	B	74.75	C	57.23	A	85.35	BB	78.76	F51	批发业	广东省	440000	深圳市	440300
000025	特力A	2015	2	4	B	73.62	C	49.47	BBB	80.46	BBB	81.69	F51	批发业	广东省	440000	深圳市	440300
000025	特力A	2015	3	4	B	73.33	C	49.47	BBB	80.46	BBB	81.19	F51	批发业	广东省	440000	深圳市	440300
000025	特力A	2015	4	4	B	72.94	C	49.47	BBB	80.46	BBB	80.49	F51	批发业	广东省	440000	深圳市	440300
000025	特力A	2016	1	3	CCC	67.67	C	49.47	BBB	80.46	B	71.25	F51	批发业	广东省	440000	深圳市	440300
000025	特力A	2016	2	3	CCC	68.58	C	49.47	A	85.35	B	71.25	F51	批发业	广东省	440000	深圳市	440300
000025	特力A	2016	3	3	CCC	68.58	C	49.47	A	85.35	B	71.25	F51	批发业	广东省	440000	深圳市	440300
000025	特力A	2016	4	3	CCC	68.58	C	49.47	A	85.35	B	71.25	F51	批发业	广东省	440000	深圳市	440300
000025	特力A	2017	1	4	B	71.22	C	49.47	A	85.35	BB	75.87	F51	批发业	广东省	440000	深圳市	440300
000025	特力A	2017	2	4	B	72.3	C	53.92	A	85.35	BB	75.87	F51	批发业	广东省	440000	深圳市	440300
000025	特力A	2017	3	4	B	72.3	C	53.92	A	85.35	BB	75.87	F51	批发业	广东省	440000	深圳市	440300
000025	特力A	2017	4	4	B	72.69	C	53.92	A	85.35	BB	76.56	F51	批发业	广东省	440000	深圳市	440300
000025	特力A	2018	1	4	B	74.06	C	53.92	A	85.35	BB	78.96	F51	批发业	广东省	440000	深圳市	440300
000025	特力A	2018	2	4	B	70.45	C	50.04	BB	75.58	BB	77.49	F51	批发业	广东省	440000	深圳市	440300
000025	特力A	2018	3	4	B	70.71	C	50.04	BB	75.58	BB	77.95	F51	批发业	广东省	440000	深圳市	440300
000025	特力A	2018	4	4	B	71.11	C	50.04	BB	75.58	BB	78.64	F51	批发业	广东省	440000	深圳市	440300
000025	特力A	2019	1	4	B	71.59	C	52.03	BB	75.58	BB	78.64	F51	批发业	广东省	440000	深圳市	440300
000025	特力A	2019	2	4	B	74.3	C	48.15	AAA	95.12	BB	78.64	F51	批发业	广东省	440000	深圳市	440300
000025	特力A	2019	3	4	B	74.3	C	48.15	AAA	95.12	BB	78.64	F51	批发业	广东省	440000	深圳市	440300
000025	特力A	2019	4	4	B	74.3	C	48.15	AAA	95.12	BB	78.64	F51	批发业	广东省	440000	深圳市	440300
000025	特力A	2020	1	4	B	74.3	C	48.15	AAA	95.12	BB	78.64	F51	批发业	广东省	440000	深圳市	440300
000025	特力A	2020	2	4	B	74.69	C	54.01	A	85.35	BBB	80.03	F51	批发业	广东省	440000	深圳市	440300
000025	特力A	2020	3	4	B	74.69	C	54.01	A	85.35	BBB	80.03	F51	批发业	广东省	440000	深圳市	440300
000025	特力A	2020	4	4	B	74.69	C	54.01	A	85.35	BBB	80.03	F51	批发业	广东省	440000	深圳市	440300
000025	特力A	2021	1	4	B	74.69	C	54.01	A	85.35	BBB	80.03	F51	批发业	广东省	440000	深圳市	440300
000025	特力A	2021	2	4	B	73	CC	63.3	B	70.49	BB	79.05	F51	批发业	广东省	440000	深圳市	440300
000025	特力A	2021	3	4	B	73	CC	63.3	B	70.49	BB	79.05	F51	批发业	广东省	440000	深圳市	440300
000025	特力A	2021	4	4	B	72.77	CC	63.3	B	70.99	BB	78.18	F51	批发业	广东省	440000	深圳市	440300
000025	特力A	2022	1	4	B	72.77	CC	63.3	B	70.99	BB	78.18	F51	批发业	广东省	440000	深圳市	440300
000025	特力A	2022	2	4	B	73.35	CC	63.3	B	72.32	BB	78.47	F51	批发业	广东省	440000	深圳市	440300
000025	特力A	2022	3	4	B	72.77	CC	63.3	B	72.32	BB	77.2	F51	批发业	广东省	440000	深圳市	440300
000025	特力A	2022	4	4	B	72.81	CC	63.3	B	71.33	BB	78.02	F51	批发业	广东省	440000	深圳市	440300
000025	特力A	2023	1	4	B	72.81	CC	63.3	B	71.33	BB	78.02	F51	批发业	广东省	440000	深圳市	440300
000025	特力A	2023	2	4	B	73.82	CC	63.3	B	73.5	BB	78.62	F51	批发业	广东省	440000	深圳市	440300
000025	特力A	2023	3	4	B	74.56	CC	63.3	B	73.5	BBB	80.21	F51	批发业	广东省	440000	深圳市	440300
000025	特力A	2023	4	4	B	71.77	CC	63.3	B	73.01	B	74.54	F51	批发业	广东省	440000	深圳市	440300
000025	特力A	2024	1	4	B	72.03	CC	63.3	B	73.01	BB	75.11	F51	批发业	广东省	440000	深圳市	440300
000025	特力A	2024	2	2	CC	60.35	CC	63.3	B	71.04	BB	75.44	F51	批发业	广东省	440000	深圳市	440300
000025	特力A	2024	3	1	C	57.7	CC	63.3	B	71.04	BB	75.65	F51	批发业	广东省	440000	深圳市	440300
000025	特力A	2024	4	1	C	58.73	CC	63.3	B	71.04	BB	78.27	F51	批发业	广东省	440000	深圳市	440300
000026	飞亚达A	2009	1	6	BBB	81.11	C	58.02	AAA	100	BBB	84.79	C35	专用设备制造业	广东省	440000	深圳市	440300
000026	飞亚达A	2009	2	6	BBB	80.3	C	56.31	AAA	100	BBB	84.09	C35	专用设备制造业	广东省	440000	深圳市	440300
000026	飞亚达A	2009	3	6	BBB	80.7	C	56.31	AAA	100	BBB	84.79	C35	专用设备制造业	广东省	440000	深圳市	440300
000026	飞亚达A	2009	4	6	BBB	80.3	C	56.31	AAA	100	BBB	84.09	C35	专用设备制造业	广东省	440000	深圳市	440300
000026	飞亚达A	2010	1	6	BBB	80.3	C	56.31	AAA	100	BBB	84.09	F52	零售业	广东省	440000	深圳市	440300
000026	飞亚达A	2010	2	6	BBB	80.98	C	56.31	AAA	95.12	A	86.88	F52	零售业	广东省	440000	深圳市	440300
000026	飞亚达A	2010	3	6	BBB	80.98	C	56.31	AAA	95.12	A	86.88	F52	零售业	广东省	440000	深圳市	440300
000026	飞亚达A	2010	4	6	BBB	80.98	C	56.31	AAA	95.12	A	86.88	F52	零售业	广东省	440000	深圳市	440300
000026	飞亚达A	2011	1	6	BBB	80.98	C	56.31	AAA	95.12	A	86.88	F52	零售业	广东省	440000	深圳市	440300
000026	飞亚达A	2011	2	5	BB	79.82	C	54.32	AAA	100	BBB	84.09	F52	零售业	广东省	440000	深圳市	440300
000026	飞亚达A	2011	3	5	BB	79.82	C	54.32	AAA	100	BBB	84.09	F52	零售业	广东省	440000	深圳市	440300
000026	飞亚达A	2011	4	5	BB	79.82	C	54.32	AAA	100	BBB	84.09	F52	零售业	广东省	440000	深圳市	440300
000026	飞亚达A	2012	1	5	BB	79.82	C	54.32	AAA	100	BBB	84.09	F52	零售业	广东省	440000	深圳市	440300
000026	飞亚达A	2012	2	5	BB	76.04	C	47.67	AAA	100	BBB	80.31	F52	零售业	广东省	440000	深圳市	440300
000026	飞亚达A	2012	3	5	BB	75.65	C	47.67	AAA	100	BB	79.61	F52	零售业	广东省	440000	深圳市	440300
000026	飞亚达A	2012	4	5	BB	75.65	C	47.67	AAA	100	BB	79.61	F52	零售业	广东省	440000	深圳市	440300
000026	飞亚达A	2013	1	5	BB	75.65	C	47.67	AAA	100	BB	79.61	F52	零售业	广东省	440000	深圳市	440300
000026	飞亚达A	2013	2	5	BB	76.04	C	47.67	AAA	100	BBB	80.31	F52	零售业	广东省	440000	深圳市	440300
000026	飞亚达A	2013	3	5	BB	76.04	C	47.67	AAA	100	BBB	80.31	F52	零售业	广东省	440000	深圳市	440300
000026	飞亚达A	2013	4	5	BB	76.88	C	47.67	AAA	100	BBB	81.77	F52	零售业	广东省	440000	深圳市	440300
000026	飞亚达A	2014	1	5	BB	76.88	C	47.67	AAA	100	BBB	81.77	F52	零售业	广东省	440000	深圳市	440300
000026	飞亚达A	2014	2	5	BB	76.55	C	45.69	AA	90.23	A	85.26	F52	零售业	广东省	440000	深圳市	440300
000026	飞亚达A	2014	3	5	BB	75.32	C	45.69	AA	90.23	BBB	83.1	F52	零售业	广东省	440000	深圳市	440300
000026	飞亚达A	2014	4	5	BB	75.32	C	45.69	AA	90.23	BBB	83.1	F52	零售业	广东省	440000	深圳市	440300
000026	飞亚达A	2015	1	5	BB	75.32	C	45.69	AA	90.23	BBB	83.1	F52	零售业	广东省	440000	深圳市	440300
000026	飞亚达A	2015	2	5	BB	75.59	C	49.57	AAA	95.12	BBB	80.31	F52	零售业	广东省	440000	深圳市	440300
000026	飞亚达A	2015	3	5	BB	75.59	C	49.57	AAA	95.12	BBB	80.31	F52	零售业	广东省	440000	深圳市	440300
000026	飞亚达A	2015	4	5	BB	75.59	C	49.57	AAA	95.12	BBB	80.31	F52	零售业	广东省	440000	深圳市	440300
000026	飞亚达A	2016	1	5	BB	75.59	C	49.57	AAA	95.12	BBB	80.31	F52	零售业	广东省	440000	深圳市	440300
000026	飞亚达A	2016	2	5	BB	77.35	C	58.92	AA	90.23	BBB	81	F52	零售业	广东省	440000	深圳市	440300
000026	飞亚达A	2016	3	5	BB	76.96	C	58.92	AA	90.23	BBB	80.31	F52	零售业	广东省	440000	深圳市	440300
000026	飞亚达A	2016	4	5	BB	77.35	C	58.92	AA	90.23	BBB	81	F52	零售业	广东省	440000	深圳市	440300
000026	飞亚达A	2017	1	5	BB	76.96	C	58.92	AA	90.23	BBB	80.31	F52	零售业	广东省	440000	深圳市	440300
000026	飞亚达A	2017	2	5	BB	75.87	C	57.6	A	85.35	BBB	80.57	F52	零售业	广东省	440000	深圳市	440300
000026	飞亚达A	2017	3	5	BB	75.04	C	57.6	A	85.35	BB	79.11	F52	零售业	广东省	440000	深圳市	440300
000026	飞亚达A	2017	4	5	BB	75.04	C	57.6	A	85.35	BB	79.11	F52	零售业	广东省	440000	深圳市	440300
000026	飞亚达A	2018	1	5	BB	75.04	C	57.6	A	85.35	BB	79.11	F52	零售业	广东省	440000	深圳市	440300
000026	飞亚达A	2018	2	4	B	74.27	C	46.26	AA	90.23	BBB	81	F52	零售业	广东省	440000	深圳市	440300
000026	飞亚达A	2018	3	4	B	73.21	C	46.26	AA	90.23	BB	79.15	F52	零售业	广东省	440000	深圳市	440300
000026	飞亚达A	2018	4	4	B	73.21	C	46.26	AA	90.23	BB	79.15	F52	零售业	广东省	440000	深圳市	440300
000026	飞亚达	2019	1	4	B	73.21	C	46.26	AA	90.23	BB	79.15	F52	零售业	广东省	440000	深圳市	440300
000026	飞亚达	2019	2	4	B	74.9	C	56.92	A	85.35	BB	79.15	F52	零售业	广东省	440000	深圳市	440300
000026	飞亚达	2019	3	5	BB	75.95	C	56.92	A	85.35	BBB	81	F52	零售业	广东省	440000	深圳市	440300
000026	飞亚达	2019	4	5	BB	75.95	C	56.92	A	85.35	BBB	81	F52	零售业	广东省	440000	深圳市	440300
000026	飞亚达	2020	1	5	BB	75.95	C	56.92	A	85.35	BBB	81	F52	零售业	广东省	440000	深圳市	440300
000026	飞亚达	2020	2	5	BB	75.95	C	56.92	A	85.35	BBB	81	F52	零售业	广东省	440000	深圳市	440300
000026	飞亚达	2020	3	5	BB	75.95	C	56.92	A	85.35	BBB	81	F52	零售业	广东省	440000	深圳市	440300
000026	飞亚达	2020	4	5	BB	75.95	C	56.92	A	85.35	BBB	81	F52	零售业	广东省	440000	深圳市	440300
000026	飞亚达	2021	1	5	BB	75.95	C	56.92	A	85.35	BBB	81	F52	零售业	广东省	440000	深圳市	440300
000026	飞亚达	2021	2	4	B	71.07	CC	60.72	CCC	69.89	BB	79.22	F52	零售业	广东省	440000	深圳市	440300
000026	飞亚达	2021	3	4	B	70.42	CC	60.72	CCC	69.89	BB	77.63	F52	零售业	广东省	440000	深圳市	440300
000026	飞亚达	2021	4	4	B	70.97	CC	60.72	CCC	69.89	BB	78.98	F52	零售业	广东省	440000	深圳市	440300
000026	飞亚达	2022	1	4	B	70.89	CC	60.72	CCC	69.59	BB	78.98	F52	零售业	广东省	440000	深圳市	440300
000026	飞亚达	2022	2	4	B	72.4	CC	60.72	B	71.4	BBB	81.37	F52	零售业	广东省	440000	深圳市	440300
000026	飞亚达	2022	3	4	B	73.06	CC	60.72	B	71.4	BBB	82.96	F52	零售业	广东省	440000	深圳市	440300
000026	飞亚达	2022	4	4	B	73.06	CC	60.72	B	71.4	BBB	82.96	F52	零售业	广东省	440000	深圳市	440300
000026	飞亚达	2023	1	4	B	72.97	CC	60.72	B	71.1	BBB	82.96	F52	零售业	广东省	440000	深圳市	440300
000026	飞亚达	2023	2	4	B	72.26	CC	60.72	CCC	69.89	BBB	82.11	F52	零售业	广东省	440000	深圳市	440300
000026	飞亚达	2023	3	4	B	72.26	CC	60.72	CCC	69.89	BBB	82.11	F52	零售业	广东省	440000	深圳市	440300
000026	飞亚达	2023	4	4	B	71.92	CC	60.72	CCC	69.27	BBB	81.73	F52	零售业	广东省	440000	深圳市	440300
000026	飞亚达	2024	1	4	B	71.83	CC	60.72	CCC	68.97	BBB	81.73	F52	零售业	广东省	440000	深圳市	440300
000026	飞亚达	2024	2	6	BBB	82.78	BB	77.21	BB	78.47	BBB	83.85	F52	零售业	广东省	440000	深圳市	440300
000026	飞亚达	2024	3	6	BBB	84.56	BBB	81.62	BB	79.55	BBB	84.5	F52	零售业	广东省	440000	深圳市	440300
000026	飞亚达	2024	4	6	BBB	84.76	BB	77.52	BB	79.55	A	87.24	F52	零售业	广东省	440000	深圳市	440300
000027	深圳能源	2009	1	5	BB	79.01	CCC	66.78	BB	76.87	A	86.13	D44	电力、热力生产和供应业	广东省	440000	深圳市	440300
000027	深圳能源	2009	2	6	BBB	80.67	CCC	65.41	A	85.03	A	85.37	D44	电力、热力生产和供应业	广东省	440000	深圳市	440300
000027	深圳能源	2009	3	6	BBB	81.03	CCC	65.41	A	85.03	A	86.13	D44	电力、热力生产和供应业	广东省	440000	深圳市	440300
000027	深圳能源	2009	4	6	BBB	81.03	CCC	65.41	A	85.03	A	86.13	D44	电力、热力生产和供应业	广东省	440000	深圳市	440300
000027	深圳能源	2010	1	6	BBB	81.03	CCC	65.41	A	85.03	A	86.13	D44	电力、热力生产和供应业	广东省	440000	深圳市	440300
000027	深圳能源	2010	2	4	B	70.74	CCC	65.41	C	51.64	BBB	84.61	D44	电力、热力生产和供应业	广东省	440000	深圳市	440300
000027	深圳能源	2010	3	4	B	70.38	CCC	65.41	C	51.64	BBB	83.86	D44	电力、热力生产和供应业	广东省	440000	深圳市	440300
000027	深圳能源	2010	4	4	B	71.11	CCC	65.41	C	51.64	A	85.37	D44	电力、热力生产和供应业	广东省	440000	深圳市	440300
000027	深圳能源	2011	1	4	B	71.11	CCC	65.41	C	51.64	A	85.37	D44	电力、热力生产和供应业	广东省	440000	深圳市	440300
000027	深圳能源	2011	2	4	B	71.6	CCC	66.78	C	52.28	A	85.37	D44	电力、热力生产和供应业	广东省	440000	深圳市	440300
000027	深圳能源	2011	3	4	B	70.87	CCC	66.78	C	52.28	BBB	83.86	D44	电力、热力生产和供应业	广东省	440000	深圳市	440300
000027	深圳能源	2011	4	4	B	71.6	CCC	66.78	C	52.28	A	85.37	D44	电力、热力生产和供应业	广东省	440000	深圳市	440300
000027	深圳能源	2012	1	4	B	71.6	CCC	66.78	C	52.28	A	85.37	D44	电力、热力生产和供应业	广东省	440000	深圳市	440300
000027	深圳能源	2012	2	5	BB	77.45	CCC	65.41	BB	75.05	BBB	84.61	D44	电力、热力生产和供应业	广东省	440000	深圳市	440300
000027	深圳能源	2012	3	5	BB	77.08	CCC	65.41	BB	75.05	BBB	83.86	D44	电力、热力生产和供应业	广东省	440000	深圳市	440300
000027	深圳能源	2012	4	5	BB	77.81	CCC	65.41	BB	75.05	A	85.37	D44	电力、热力生产和供应业	广东省	440000	深圳市	440300
000027	深圳能源	2013	1	5	BB	77.08	CCC	65.41	BB	75.05	BBB	83.86	D44	电力、热力生产和供应业	广东省	440000	深圳市	440300
000027	深圳能源	2013	2	5	BB	75.57	CC	64.05	CCC	69.6	BBB	84.61	D44	电力、热力生产和供应业	广东省	440000	深圳市	440300
000027	深圳能源	2013	3	4	B	74.47	CC	64.05	CCC	69.6	BBB	82.34	D44	电力、热力生产和供应业	广东省	440000	深圳市	440300
000027	深圳能源	2013	4	4	B	74.34	CC	64.05	CCC	69.6	BBB	82.07	D44	电力、热力生产和供应业	广东省	440000	深圳市	440300
000027	深圳能源	2014	1	4	B	73.61	CC	64.05	CCC	69.6	BBB	80.56	D44	电力、热力生产和供应业	广东省	440000	深圳市	440300
000027	深圳能源	2014	2	5	BB	76.71	CCC	65.41	B	72.48	BBB	84.61	D44	电力、热力生产和供应业	广东省	440000	深圳市	440300
000027	深圳能源	2014	3	5	BB	76.71	CCC	65.41	B	72.48	BBB	84.61	D44	电力、热力生产和供应业	广东省	440000	深圳市	440300
000027	深圳能源	2014	4	5	BB	77.04	CCC	65.41	B	73.65	BBB	84.61	D44	电力、热力生产和供应业	广东省	440000	深圳市	440300
000027	深圳能源	2015	1	5	BB	77.04	CCC	65.41	B	73.65	BBB	84.61	D44	电力、热力生产和供应业	广东省	440000	深圳市	440300
000027	深圳能源	2015	2	5	BB	78.13	CCC	65.41	BB	78.71	BBB	83.86	D44	电力、热力生产和供应业	广东省	440000	深圳市	440300
000027	深圳能源	2015	3	5	BB	77.76	CCC	65.41	BB	78.71	BBB	83.1	D44	电力、热力生产和供应业	广东省	440000	深圳市	440300
000027	深圳能源	2015	4	5	BB	78.13	CCC	65.41	BB	78.71	BBB	83.86	D44	电力、热力生产和供应业	广东省	440000	深圳市	440300
000027	深圳能源	2016	1	5	BB	77.76	CCC	65.41	BB	78.71	BBB	83.1	D44	电力、热力生产和供应业	广东省	440000	深圳市	440300
000027	深圳能源	2016	2	6	BBB	80.6	CCC	66.78	A	86.26	BBB	83.86	D44	电力、热力生产和供应业	广东省	440000	深圳市	440300
000027	深圳能源	2016	3	6	BBB	80.67	CCC	66.78	A	86.26	BBB	83.99	D44	电力、热力生产和供应业	广东省	440000	深圳市	440300
000027	深圳能源	2016	4	4	B	70.82	CCC	66.78	C	53.38	BBB	83.1	D44	电力、热力生产和供应业	广东省	440000	深圳市	440300
000027	深圳能源	2017	1	4	B	71.19	CCC	66.78	C	53.38	BBB	83.86	D44	电力、热力生产和供应业	广东省	440000	深圳市	440300
000027	深圳能源	2017	2	3	CCC	68.91	CCC	65.41	C	50.07	BBB	81.75	D44	电力、热力生产和供应业	广东省	440000	深圳市	440300
000027	深圳能源	2017	3	3	CCC	68.91	CCC	65.41	C	50.07	BBB	81.75	D44	电力、热力生产和供应业	广东省	440000	深圳市	440300
000027	深圳能源	2017	4	4	B	73.38	CCC	65.41	CCC	65.67	BBB	81.75	D44	电力、热力生产和供应业	广东省	440000	深圳市	440300
000027	深圳能源	2018	1	4	B	73.38	CCC	65.41	CCC	65.67	BBB	81.75	D44	电力、热力生产和供应业	广东省	440000	深圳市	440300
000027	深圳能源	2018	2	5	BB	75.76	CCC	65.22	B	71.87	BBB	83.1	D44	电力、热力生产和供应业	广东省	440000	深圳市	440300
000027	深圳能源	2018	3	5	BB	75.76	CCC	65.22	B	71.87	BBB	83.1	D44	电力、热力生产和供应业	广东省	440000	深圳市	440300
000027	深圳能源	2018	4	5	BB	77.99	CCC	65.22	BB	79.67	BBB	83.1	D44	电力、热力生产和供应业	广东省	440000	深圳市	440300
000027	深圳能源	2019	1	5	BB	78.42	CCC	65.22	BB	79.67	BBB	83.99	D44	电力、热力生产和供应业	广东省	440000	深圳市	440300
000027	深圳能源	2019	2	5	BB	79.61	CCC	65.22	BBB	82.55	BBB	84.75	D44	电力、热力生产和供应业	广东省	440000	深圳市	440300
000027	深圳能源	2019	3	5	BB	78.82	CCC	65.22	BBB	82.55	BBB	83.1	D44	电力、热力生产和供应业	广东省	440000	深圳市	440300
000027	深圳能源	2019	4	6	BBB	81.05	CCC	65.22	AA	90.36	BBB	83.1	D44	电力、热力生产和供应业	广东省	440000	深圳市	440300
000027	深圳能源	2020	1	6	BBB	81.42	CCC	65.22	AA	90.36	BBB	83.86	D44	电力、热力生产和供应业	广东省	440000	深圳市	440300
000027	深圳能源	2020	2	6	BBB	80.59	CCC	67.55	A	86.85	BBB	83.1	D44	电力、热力生产和供应业	广东省	440000	深圳市	440300
000027	深圳能源	2020	3	6	BBB	80.59	CCC	67.55	A	86.85	BBB	83.1	D44	电力、热力生产和供应业	广东省	440000	深圳市	440300
000027	深圳能源	2020	4	6	BBB	80.59	CCC	67.55	A	86.85	BBB	83.1	D44	电力、热力生产和供应业	广东省	440000	深圳市	440300
000027	深圳能源	2021	1	6	BBB	80.59	CCC	67.55	A	86.85	BBB	83.1	D44	电力、热力生产和供应业	广东省	440000	深圳市	440300
000027	深圳能源	2021	2	4	B	70.7	CC	64.26	CCC	66	BBB	80.21	D44	电力、热力生产和供应业	广东省	440000	深圳市	440300
000027	深圳能源	2021	3	4	B	71.03	CC	64.26	CCC	66	BBB	81.08	D44	电力、热力生产和供应业	广东省	440000	深圳市	440300
000027	深圳能源	2021	4	4	B	71.42	CC	64.26	CCC	66.41	BBB	81.87	D44	电力、热力生产和供应业	广东省	440000	深圳市	440300
000027	深圳能源	2022	1	4	B	70.81	CC	64.26	CCC	66.41	BBB	80.28	D44	电力、热力生产和供应业	广东省	440000	深圳市	440300
000027	深圳能源	2022	2	3	CCC	69.5	CC	62.6	CCC	65.66	BB	79.06	D44	电力、热力生产和供应业	广东省	440000	深圳市	440300
000027	深圳能源	2022	3	3	CCC	69.5	CC	62.6	CCC	65.66	BB	79.06	D44	电力、热力生产和供应业	广东省	440000	深圳市	440300
000027	深圳能源	2022	4	3	CCC	69.69	CC	62.6	CCC	66.07	BB	79.32	D44	电力、热力生产和供应业	广东省	440000	深圳市	440300
000027	深圳能源	2023	1	4	B	70.29	CC	62.6	CCC	66.07	BBB	80.91	D44	电力、热力生产和供应业	广东省	440000	深圳市	440300
000027	深圳能源	2023	2	6	BBB	82.79	BB	79.43	BBB	84.61	A	85.49	D44	电力、热力生产和供应业	广东省	440000	深圳市	440300
000027	深圳能源	2023	3	6	BBB	82.91	BB	79.43	BBB	84.61	A	85.8	D44	电力、热力生产和供应业	广东省	440000	深圳市	440300
000027	深圳能源	2023	4	6	BBB	81.9	BB	79.43	A	85.02	BBB	82.94	D44	电力、热力生产和供应业	广东省	440000	深圳市	440300
000027	深圳能源	2024	1	6	BBB	81.54	BB	79.24	BBB	84	BBB	82.74	D44	电力、热力生产和供应业	广东省	440000	深圳市	440300
000027	深圳能源	2024	2	4	B	74.33	B	73.38	A	85.94	BB	79.53	D44	电力、热力生产和供应业	广东省	440000	深圳市	440300
000027	深圳能源	2024	3	4	B	72.9	B	72.24	A	85.94	BB	78.7	D44	电力、热力生产和供应业	广东省	440000	深圳市	440300
000027	深圳能源	2024	4	5	BB	77.76	B	74.23	A	85.94	BBB	82.2	D44	电力、热力生产和供应业	广东省	440000	深圳市	440300
000028	一致药业	2009	1	4	B	73.68	C	52.34	AA	90.23	BB	77.37	C27	医药制造业	广东省	440000	深圳市	440300
000028	一致药业	2009	2	5	BB	76.68	CCC	65.96	AAA	95.12	BB	75.21	C27	医药制造业	广东省	440000	深圳市	440300
000028	一致药业	2009	3	5	BB	77.08	CCC	65.96	AAA	95.12	BB	75.91	C27	医药制造业	广东省	440000	深圳市	440300
000028	一致药业	2009	4	5	BB	79.58	CCC	65.96	AAA	95.12	BBB	80.31	C27	医药制造业	广东省	440000	深圳市	440300
000028	一致药业	2010	1	5	BB	79.58	CCC	65.96	AAA	95.12	BBB	80.31	F51	批发业	广东省	440000	深圳市	440300
000028	一致药业	2010	2	3	CCC	68.04	C	52.34	BB	75.58	B	72.28	F51	批发业	广东省	440000	深圳市	440300
000028	一致药业	2010	3	3	CCC	69.27	C	52.34	BB	75.58	B	74.44	F51	批发业	广东省	440000	深圳市	440300
000028	一致药业	2010	4	4	B	72.22	C	52.34	BB	75.58	BB	79.61	F51	批发业	广东省	440000	深圳市	440300
000028	国药一致	2011	1	4	B	72.22	C	52.34	BB	75.58	BB	79.61	F51	批发业	广东省	440000	深圳市	440300
000028	国药一致	2011	2	4	B	74.89	C	58.3	AAA	100	B	73.75	F51	批发业	广东省	440000	深圳市	440300
000028	国药一致	2011	3	4	B	74.89	C	58.3	AAA	100	B	73.75	F51	批发业	广东省	440000	深圳市	440300
000028	国药一致	2011	4	5	BB	76.56	C	58.3	AAA	100	BB	76.68	F51	批发业	广东省	440000	深圳市	440300
000028	国药一致	2012	1	5	BB	76.56	C	58.3	AAA	100	BB	76.68	F51	批发业	广东省	440000	深圳市	440300
000028	国药一致	2012	2	4	B	71.76	C	58.3	A	85.35	B	73.05	F51	批发业	广东省	440000	深圳市	440300
000028	国药一致	2012	3	4	B	72.16	C	58.3	A	85.35	B	73.75	F51	批发业	广东省	440000	深圳市	440300
000028	国药一致	2012	4	4	B	72.99	C	58.3	A	85.35	BB	75.21	F51	批发业	广东省	440000	深圳市	440300
000028	国药一致	2013	1	4	B	72.2	C	58.3	A	85.35	B	73.83	F51	批发业	广东省	440000	深圳市	440300
000028	国药一致	2013	2	4	B	73.44	C	58.01	AA	90.23	B	74.52	F51	批发业	广东省	440000	深圳市	440300
000028	国药一致	2013	3	4	B	73.04	C	58.01	AA	90.23	B	73.83	F51	批发业	广东省	440000	深圳市	440300
000028	国药一致	2013	4	4	B	73.88	C	58.01	AA	90.23	BB	75.29	F51	批发业	广东省	440000	深圳市	440300
000028	国药一致	2014	1	4	B	74.71	C	58.01	AA	90.23	BB	76.76	F51	批发业	广东省	440000	深圳市	440300
000028	国药一致	2014	2	5	BB	78.27	CCC	67.56	AA	90.23	BB	78.92	F51	批发业	广东省	440000	深圳市	440300
000028	国药一致	2014	3	5	BB	78.66	CCC	67.56	AA	90.23	BB	79.61	F51	批发业	广东省	440000	深圳市	440300
000028	国药一致	2014	4	5	BB	76.99	CCC	67.56	AA	90.23	BB	76.68	F51	批发业	广东省	440000	深圳市	440300
000028	国药一致	2015	1	5	BB	76.99	CCC	67.56	AA	90.23	BB	76.68	F51	批发业	广东省	440000	深圳市	440300
000028	国药一致	2015	2	4	B	72.43	C	49.47	AAA	95.12	B	74.79	F51	批发业	广东省	440000	深圳市	440300
000028	国药一致	2015	3	4	B	72.43	C	49.47	AAA	95.12	B	74.79	F51	批发业	广东省	440000	深圳市	440300
000028	国药一致	2015	4	4	B	72.43	C	49.47	AAA	95.12	B	74.79	F51	批发业	广东省	440000	深圳市	440300
000028	国药一致	2016	1	4	B	72.43	C	49.47	AAA	95.12	B	74.79	F51	批发业	广东省	440000	深圳市	440300
000028	国药一致	2016	2	5	BB	79.39	CCC	67.56	BBB	80.46	BBB	84.09	F51	批发业	广东省	440000	深圳市	440300
000028	国药一致	2016	3	5	BB	78.99	CCC	67.56	BBB	80.46	BBB	83.4	F51	批发业	广东省	440000	深圳市	440300
000028	国药一致	2016	4	5	BB	79.39	CCC	67.56	BBB	80.46	BBB	84.09	F51	批发业	广东省	440000	深圳市	440300
000028	国药一致	2017	1	5	BB	79.39	CCC	67.56	BBB	80.46	BBB	84.09	F51	批发业	广东省	440000	深圳市	440300
000028	国药一致	2017	2	7	A	85.97	BB	77.78	AAA	100	BBB	84.86	F51	批发业	广东省	440000	深圳市	440300
000028	国药一致	2017	3	7	A	85.97	BB	77.78	AAA	100	BBB	84.86	F51	批发业	广东省	440000	深圳市	440300
000028	国药一致	2017	4	7	A	86.8	BB	77.78	AAA	100	A	86.33	F51	批发业	广东省	440000	深圳市	440300
000028	国药一致	2018	1	7	A	87.2	BB	77.78	AAA	100	A	87.02	F51	批发业	广东省	440000	深圳市	440300
000028	国药一致	2018	2	5	BB	78.56	C	52.91	AAA	95.12	BBB	84.09	F51	批发业	广东省	440000	深圳市	440300
000028	国药一致	2018	3	5	BB	77.11	C	52.91	AAA	95.12	BBB	81.55	F51	批发业	广东省	440000	深圳市	440300
000028	国药一致	2018	4	5	BB	77.51	C	52.91	AAA	95.12	BBB	82.24	F51	批发业	广东省	440000	深圳市	440300
000028	国药一致	2019	1	5	BB	78.34	C	52.91	AAA	95.12	BBB	83.71	F51	批发业	广东省	440000	深圳市	440300
000028	国药一致	2019	2	5	BB	79.45	C	52.09	AAA	100	BBB	84.4	F51	批发业	广东省	440000	深圳市	440300
000028	国药一致	2019	3	5	BB	79.45	C	52.09	AAA	100	BBB	84.4	F51	批发业	广东省	440000	深圳市	440300
000028	国药一致	2019	4	5	BB	79.45	C	52.09	AAA	100	BBB	84.4	F51	批发业	广东省	440000	深圳市	440300
000028	国药一致	2020	1	5	BB	79.45	C	52.09	AAA	100	BBB	84.4	F51	批发业	广东省	440000	深圳市	440300
000028	国药一致	2020	2	4	B	73.88	C	46.26	AAA	95.12	BB	78.72	F51	批发业	广东省	440000	深圳市	440300
000028	国药一致	2020	3	4	B	73.49	C	46.26	AAA	95.12	BB	78.03	F51	批发业	广东省	440000	深圳市	440300
000028	国药一致	2020	4	5	BB	75.16	C	46.26	AAA	95.12	BBB	80.96	F51	批发业	广东省	440000	深圳市	440300
000028	国药一致	2021	1	4	B	73.49	C	46.26	AAA	95.12	BB	78.03	F51	批发业	广东省	440000	深圳市	440300
000028	国药一致	2021	2	5	BB	76.11	C	56.64	BBB	84.56	BB	78.6	F51	批发业	广东省	440000	深圳市	440300
000028	国药一致	2021	3	5	BB	75.97	C	56.64	BBB	84.56	BB	78.28	F51	批发业	广东省	440000	深圳市	440300
000028	国药一致	2021	4	5	BB	75.83	C	56.64	BBB	84.83	BB	77.75	F51	批发业	广东省	440000	深圳市	440300
000028	国药一致	2022	1	5	BB	75.28	C	56.64	BBB	84.83	BB	76.48	F51	批发业	广东省	440000	深圳市	440300
000028	国药一致	2022	2	4	B	74.59	C	56.64	BB	79.33	BB	79.35	F51	批发业	广东省	440000	深圳市	440300
000028	国药一致	2022	3	4	B	74.45	C	56.64	BB	79.33	BB	79.03	F51	批发业	广东省	440000	深圳市	440300
000028	国药一致	2022	4	4	B	74.59	C	56.64	BB	79.6	BB	79.12	F51	批发业	广东省	440000	深圳市	440300
000028	国药一致	2023	1	5	BB	75.38	C	56.64	BB	79.87	BBB	80.71	F51	批发业	广东省	440000	深圳市	440300
000028	国药一致	2023	2	4	B	74.51	C	56.64	BBB	81.59	BB	77.33	F51	批发业	广东省	440000	深圳市	440300
000028	国药一致	2023	3	4	B	74.51	C	56.64	BBB	81.59	BB	77.33	F51	批发业	广东省	440000	深圳市	440300
000028	国药一致	2023	4	4	B	74.43	C	56.64	BB	79.72	BB	78.65	F51	批发业	广东省	440000	深圳市	440300
000028	国药一致	2024	1	5	BB	75.59	CC	60.27	BB	79.72	BB	79.56	F51	批发业	广东省	440000	深圳市	440300
000028	国药一致	2024	2	5	BB	77.95	B	74.45	BBB	82.31	BB	78.27	F51	批发业	广东省	440000	深圳市	440300
000028	国药一致	2024	3	6	BBB	83.28	BB	75.91	BBB	82.59	BBB	83.15	F51	批发业	广东省	440000	深圳市	440300
000028	国药一致	2024	4	6	BBB	82.29	BB	75.91	BBB	82.48	BBB	81.57	F51	批发业	广东省	440000	深圳市	440300
000029	深深房A	2009	1	4	B	74.15	C	51.51	B	72.88	BBB	82.82	K70	房地产业	广东省	440000	深圳市	440300
000029	深深房A	2009	2	5	BB	77.93	C	51.51	BBB	82.9	BBB	81.93	K70	房地产业	广东省	440000	深圳市	440300
000029	深深房A	2009	3	5	BB	78.32	C	51.51	BBB	82.9	BBB	82.82	K70	房地产业	广东省	440000	深圳市	440300
000029	深深房A	2009	4	5	BB	77.93	C	51.51	BBB	82.9	BBB	81.93	K70	房地产业	广东省	440000	深圳市	440300
000029	深深房A	2010	1	5	BB	78.32	C	51.51	BBB	82.9	BBB	82.82	K70	房地产业	广东省	440000	深圳市	440300
000029	深深房A	2010	2	5	BB	75.54	C	51.51	BB	79.98	BB	79.26	K70	房地产业	广东省	440000	深圳市	440300
000029	深深房A	2010	3	4	B	74.93	C	51.51	BB	79.98	BB	77.86	K70	房地产业	广东省	440000	深圳市	440300
000029	深深房A	2010	4	5	BB	75.93	C	51.51	BB	79.98	BBB	80.15	K70	房地产业	广东省	440000	深圳市	440300
000029	深深房A	2011	1	5	BB	75.93	C	51.51	BB	79.98	BBB	80.15	K70	房地产业	广东省	440000	深圳市	440300
000029	深深房A	2011	2	5	BB	76.55	C	53.09	BB	79.98	BBB	81.04	K70	房地产业	广东省	440000	深圳市	440300
000029	深深房A	2011	3	5	BB	76.55	C	53.09	BB	79.98	BBB	81.04	K70	房地产业	广东省	440000	深圳市	440300
000029	深深房A	2011	4	5	BB	76.94	C	53.09	BB	79.98	BBB	81.93	K70	房地产业	广东省	440000	深圳市	440300
000029	深深房A	2012	1	5	BB	76.94	C	53.09	BB	79.98	BBB	81.93	K70	房地产业	广东省	440000	深圳市	440300
000029	深深房A	2012	2	5	BB	76.59	C	54.89	BBB	80.39	BBB	80.15	K70	房地产业	广东省	440000	深圳市	440300
000029	深深房A	2012	3	5	BB	76.59	C	54.89	BBB	80.39	BBB	80.15	K70	房地产业	广东省	440000	深圳市	440300
000029	深深房A	2012	4	5	BB	76.59	C	54.89	BBB	80.39	BBB	80.15	K70	房地产业	广东省	440000	深圳市	440300
000029	深深房A	2013	1	5	BB	76.99	C	54.89	BBB	80.39	BBB	81.04	K70	房地产业	广东省	440000	深圳市	440300
000029	深深房A	2013	2	5	BB	75.69	C	59.84	BB	79.98	BB	76.84	K70	房地产业	广东省	440000	深圳市	440300
000029	深深房A	2013	3	5	BB	75.69	C	59.84	BB	79.98	BB	76.84	K70	房地产业	广东省	440000	深圳市	440300
000029	深深房A	2013	4	5	BB	75.47	C	59.84	BBB	80.39	BB	75.95	K70	房地产业	广东省	440000	深圳市	440300
000029	深深房A	2014	1	5	BB	75.47	C	59.84	BBB	80.39	BB	75.95	K70	房地产业	广东省	440000	深圳市	440300
000029	深深房A	2014	2	4	B	74.96	C	53.31	BB	79.98	BB	77.35	K70	房地产业	广东省	440000	深圳市	440300
000029	深深房A	2014	3	4	B	74.57	C	53.31	BB	79.98	BB	76.46	K70	房地产业	广东省	440000	深圳市	440300
000029	深深房A	2014	4	5	BB	76.19	C	53.31	BB	79.98	BBB	80.15	K70	房地产业	广东省	440000	深圳市	440300
000029	深深房A	2015	1	5	BB	76.19	C	53.31	BB	79.98	BBB	80.15	K70	房地产业	广东省	440000	深圳市	440300
000029	深深房A	2015	2	5	BB	76.12	C	53.31	BBB	81.81	BB	78.24	K70	房地产业	广东省	440000	深圳市	440300
000029	深深房A	2015	3	5	BB	76.12	C	53.31	BBB	81.81	BB	78.24	K70	房地产业	广东省	440000	深圳市	440300
000029	深深房A	2015	4	5	BB	77.74	C	53.31	BBB	81.81	BBB	81.93	K70	房地产业	广东省	440000	深圳市	440300
000029	深深房A	2016	1	5	BB	77.74	C	53.31	BBB	81.81	BBB	81.93	K70	房地产业	广东省	440000	深圳市	440300
000029	深深房A	2016	2	5	BB	76.71	C	51.51	BB	79.98	BBB	81.93	K70	房地产业	广东省	440000	深圳市	440300
000029	深深房A	2016	3	5	BB	76.71	C	51.51	BB	79.98	BBB	81.93	K70	房地产业	广东省	440000	深圳市	440300
000029	深深房A	2016	4	5	BB	76.71	C	51.51	BB	79.98	BBB	81.93	K70	房地产业	广东省	440000	深圳市	440300
000029	深深房A	2017	1	5	BB	76.71	C	51.51	BB	79.98	BBB	81.93	K70	房地产业	广东省	440000	深圳市	440300
000029	深深房A	2017	2	5	BB	79.67	C	52.41	A	85.82	BBB	82.82	K70	房地产业	广东省	440000	深圳市	440300
000029	深深房A	2017	3	5	BB	79.67	C	52.41	A	85.82	BBB	82.82	K70	房地产业	广东省	440000	深圳市	440300
000029	深深房A	2017	4	6	BBB	80.36	C	52.41	A	87.5	BBB	82.82	K70	房地产业	广东省	440000	深圳市	440300
000029	深深房A	2018	1	6	BBB	80.36	C	52.41	A	87.5	BBB	82.82	K70	房地产业	广东省	440000	深圳市	440300
000029	深深房A	2018	2	5	BB	77.76	C	52.41	BBB	81.23	BBB	82.82	K70	房地产业	广东省	440000	深圳市	440300
000029	深深房A	2018	3	5	BB	76.32	C	52.41	BBB	81.23	BB	79.56	K70	房地产业	广东省	440000	深圳市	440300
000029	深深房A	2018	4	5	BB	76.71	C	52.41	BBB	81.23	BBB	80.45	K70	房地产业	广东省	440000	深圳市	440300
000029	深深房A	2019	1	5	BB	76.71	C	52.41	BBB	81.23	BBB	80.45	K70	房地产业	广东省	440000	深圳市	440300
000029	深深房A	2019	2	5	BB	77.93	C	52.41	BBB	84.15	BBB	80.45	K70	房地产业	广东省	440000	深圳市	440300
000029	深深房A	2019	3	5	BB	77.93	C	52.41	BBB	84.15	BBB	80.45	K70	房地产业	广东省	440000	深圳市	440300
000029	深深房A	2019	4	5	BB	77.93	C	52.41	BBB	84.15	BBB	80.45	K70	房地产业	广东省	440000	深圳市	440300
000029	深深房A	2020	1	5	BB	77.93	C	52.41	BBB	84.15	BBB	80.45	K70	房地产业	广东省	440000	深圳市	440300
000029	深深房A	2020	2	5	BB	77.1	C	52.41	BBB	81.23	BBB	81.33	K70	房地产业	广东省	440000	深圳市	440300
000029	深深房A	2020	3	5	BB	77.72	C	52.41	BBB	81.23	BBB	82.73	K70	房地产业	广东省	440000	深圳市	440300
000029	深深房A	2020	4	5	BB	77.72	C	52.41	BBB	81.23	BBB	82.73	K70	房地产业	广东省	440000	深圳市	440300
000029	深深房A	2021	1	5	BB	77.1	C	52.41	BBB	81.23	BBB	81.33	K70	房地产业	广东省	440000	深圳市	440300
000029	深深房A	2021	2	4	B	74.77	CCC	65.5	B	73.41	BBB	83.05	K70	房地产业	广东省	440000	深圳市	440300
000029	深深房A	2021	3	4	B	74.77	CCC	65.5	B	73.41	BBB	83.05	K70	房地产业	广东省	440000	深圳市	440300
000029	深深房A	2021	4	4	B	74.37	CCC	65.5	B	73.13	BBB	82.26	K70	房地产业	广东省	440000	深圳市	440300
000029	深深房A	2022	1	4	B	74.37	CCC	65.5	B	73.13	BBB	82.26	K70	房地产业	广东省	440000	深圳市	440300
000029	深深房A	2022	2	5	BB	75.26	CCC	65.5	B	74.39	BBB	83.56	K70	房地产业	广东省	440000	深圳市	440300
000029	深深房A	2022	3	5	BB	75.26	CCC	65.5	B	74.39	BBB	83.56	K70	房地产业	广东省	440000	深圳市	440300
000029	深深房A	2022	4	4	B	74.8	CCC	65.5	B	74.11	BBB	82.62	K70	房地产业	广东省	440000	深圳市	440300
000029	深深房A	2023	1	4	B	74.93	CCC	65.5	B	74.11	BBB	82.94	K70	房地产业	广东省	440000	深圳市	440300
000029	深深房A	2023	2	5	BB	77.8	B	72.15	BB	77.7	BBB	82.31	K70	房地产业	广东省	440000	深圳市	440300
000029	深深房A	2023	3	5	BB	77.8	B	72.15	BB	77.7	BBB	82.31	K70	房地产业	广东省	440000	深圳市	440300
000029	深深房A	2023	4	5	BB	77.45	B	72.15	BB	77.41	BBB	81.63	K70	房地产业	广东省	440000	深圳市	440300
000029	深深房A	2024	1	5	BB	76.99	B	71.69	BB	77.41	BBB	80.83	K70	房地产业	广东省	440000	深圳市	440300
000029	深深房A	2024	2	3	CCC	69.76	CCC	69.42	BB	78.19	BB	77.11	K70	房地产业	广东省	440000	深圳市	440300
000029	深深房A	2024	3	4	B	72.19	B	70.48	BB	76.07	BB	79.65	K70	房地产业	广东省	440000	深圳市	440300
000029	深深房A	2024	4	4	B	71.29	CCC	69.49	BB	77.88	BB	79.25	K70	房地产业	广东省	440000	深圳市	440300
000030	ST 盛润A	2009	1	2	CC	60.78	C	49.13	C	54.39	B	71.03	C41	其他制造业	广东省	440000	深圳市	440300
000030	ST 盛润A	2009	2	1	C	57.7	C	45.76	C	53.04	CCC	66.94	C41	其他制造业	广东省	440000	深圳市	440300
000030	ST 盛润A	2009	3	1	C	57.7	C	45.76	C	53.04	CCC	66.94	C41	其他制造业	广东省	440000	深圳市	440300
000030	ST 盛润A	2009	4	1	C	57.7	C	45.76	C	53.04	CCC	66.94	C41	其他制造业	广东省	440000	深圳市	440300
000030	*ST 盛润A	2010	1	1	C	58.61	C	45.76	C	53.04	CCC	68.93	C41	其他制造业	广东省	440000	深圳市	440300
000030	*ST 盛润A	2010	2	1	C	57.95	C	49.35	C	53.04	CCC	65.66	C41	其他制造业	广东省	440000	深圳市	440300
000030	*ST 盛润A	2010	3	1	C	57.04	C	49.35	C	53.04	CC	63.66	C41	其他制造业	广东省	440000	深圳市	440300
000030	*ST 盛润A	2010	4	1	C	57.04	C	49.35	C	53.04	CC	63.66	C41	其他制造业	广东省	440000	深圳市	440300
000030	*ST 盛润A	2011	1	1	C	57.04	C	49.35	C	53.04	CC	63.66	C41	其他制造业	广东省	440000	深圳市	440300
000030	*ST 盛润A	2011	2	2	CC	62.88	C	49.35	C	57.74	B	73.25	C41	其他制造业	广东省	440000	深圳市	440300
000030	*ST 盛润A	2011	3	2	CC	63.81	C	49.35	C	57.74	BB	75.29	C41	其他制造业	广东省	440000	深圳市	440300
000030	*ST 盛润A	2011	4	2	CC	64.94	C	49.35	C	57.74	BB	77.75	C41	其他制造业	广东省	440000	深圳市	440300
000030	*ST 盛润A	2012	1	2	CC	64.94	C	49.35	C	57.74	BB	77.75	C41	其他制造业	广东省	440000	深圳市	440300
000030	*ST 盛润A	2012	2	1	C	59.8	C	49.35	C	57.74	CCC	66.53	C41	其他制造业	广东省	440000	深圳市	440300
000030	*ST 盛润A	2012	3	1	C	58.84	C	49.35	C	57.74	CC	64.43	C41	其他制造业	广东省	440000	深圳市	440300
000030	*ST 盛润A	2012	4	1	C	58.84	C	49.35	C	57.74	CC	64.43	C41	其他制造业	广东省	440000	深圳市	440300
000030	富奥股份	2013	1	1	C	59.8	C	49.35	C	57.74	CCC	66.53	C41	其他制造业	吉林省	220000	长春市	220100
000030	富奥股份	2013	2	1	C	57.06	C	49.35	C	53.04	CC	63.71	C41	其他制造业	吉林省	220000	长春市	220100
000030	富奥股份	2013	3	1	C	56.69	C	49.35	C	53.04	CC	62.89	C41	其他制造业	吉林省	220000	长春市	220100
000030	富奥股份	2013	4	1	C	58.64	C	49.35	C	53.04	CCC	67.17	C41	其他制造业	吉林省	220000	长春市	220100
000030	富奥股份	2014	1	1	C	58.72	C	49.35	C	53.04	CCC	67.35	C36	汽车制造业	吉林省	220000	长春市	220100
000030	富奥股份	2014	2	3	CCC	66.91	C	52.29	CCC	67.51	B	73.96	C36	汽车制造业	吉林省	220000	长春市	220100
000030	富奥股份	2014	3	3	CCC	67	C	52.29	CCC	67.51	B	74.17	C36	汽车制造业	吉林省	220000	长春市	220100
000030	富奥股份	2014	4	3	CCC	67.08	C	52.29	CCC	67.51	B	74.35	C36	汽车制造业	吉林省	220000	长春市	220100
000030	富奥股份	2015	1	3	CCC	67.08	C	52.29	CCC	67.51	B	74.35	C36	汽车制造业	吉林省	220000	长春市	220100
000030	富奥股份	2015	2	3	CCC	65.57	C	52.29	CC	60.45	BB	75.81	C36	汽车制造业	吉林省	220000	长春市	220100
000030	富奥股份	2015	3	3	CCC	65.85	C	52.29	CC	60.45	BB	76.42	C36	汽车制造业	吉林省	220000	长春市	220100
000030	富奥股份	2015	4	3	CCC	65.85	C	52.29	CC	60.45	BB	76.42	C36	汽车制造业	吉林省	220000	长春市	220100
000030	富奥股份	2016	1	3	CCC	65.85	C	52.29	CC	60.45	BB	76.42	C36	汽车制造业	吉林省	220000	长春市	220100
000030	富奥股份	2016	2	3	CCC	68.03	C	52.29	CCC	67.51	BB	76.42	C36	汽车制造业	吉林省	220000	长春市	220100
000030	富奥股份	2016	3	3	CCC	68.97	C	52.29	CCC	67.51	BB	78.47	C36	汽车制造业	吉林省	220000	长春市	220100
000030	富奥股份	2016	4	3	CCC	67.76	C	52.29	CCC	67.51	BB	75.83	C36	汽车制造业	吉林省	220000	长春市	220100
000030	富奥股份	2017	1	3	CCC	67.84	C	52.29	CCC	67.51	BB	76.01	C36	汽车制造业	吉林省	220000	长春市	220100
000030	富奥股份	2017	2	3	CCC	66.65	C	50.52	CC	62.54	BB	77.65	C36	汽车制造业	吉林省	220000	长春市	220100
000030	富奥股份	2017	3	3	CCC	66.27	C	50.52	CC	62.54	BB	76.83	C36	汽车制造业	吉林省	220000	长春市	220100
000030	富奥股份	2017	4	3	CCC	66.73	C	50.52	CC	62.54	BB	77.83	C36	汽车制造业	吉林省	220000	长春市	220100
000030	富奥股份	2018	1	3	CCC	66.27	C	50.52	CC	62.54	BB	76.83	C36	汽车制造业	吉林省	220000	长春市	220100
000030	富奥股份	2018	2	3	CCC	67.43	C	53.89	CC	62.54	BB	77.65	C36	汽车制造业	吉林省	220000	长春市	220100
000030	富奥股份	2018	3	3	CCC	65.98	C	53.89	CC	62.54	B	74.47	C36	汽车制造业	吉林省	220000	长春市	220100
000030	富奥股份	2018	4	3	CCC	65.6	C	53.89	CC	62.54	B	73.65	C36	汽车制造业	吉林省	220000	长春市	220100
000030	富奥股份	2019	1	3	CCC	65.6	C	53.89	CC	62.54	B	73.65	C36	汽车制造业	吉林省	220000	长春市	220100
000030	富奥股份	2019	2	3	CCC	65.96	C	50.52	CC	63.8	BB	75.29	C36	汽车制造业	吉林省	220000	长春市	220100
000030	富奥股份	2019	3	3	CCC	65.96	C	50.52	CC	63.8	BB	75.29	C36	汽车制造业	吉林省	220000	长春市	220100
000030	富奥股份	2019	4	3	CCC	65.58	C	50.52	CC	63.8	B	74.47	C36	汽车制造业	吉林省	220000	长春市	220100
000030	富奥股份	2020	1	3	CCC	65.58	C	50.52	CC	63.8	B	74.47	C36	汽车制造业	吉林省	220000	长春市	220100
000030	富奥股份	2020	2	3	CCC	67.26	C	53.89	CC	64.26	BB	76.11	C36	汽车制造业	吉林省	220000	长春市	220100
000030	富奥股份	2020	3	3	CCC	67.26	C	53.89	CC	64.26	BB	76.11	C36	汽车制造业	吉林省	220000	长春市	220100
000030	富奥股份	2020	4	3	CCC	70	C	53.89	CC	64.26	BBB	82.09	C36	汽车制造业	吉林省	220000	长春市	220100
000030	富奥股份	2021	1	3	CCC	70	C	53.89	CC	64.26	BBB	82.09	C36	汽车制造业	吉林省	220000	长春市	220100
000030	富奥股份	2021	2	3	CCC	69.89	C	59.79	B	73.49	B	74.03	C36	汽车制造业	吉林省	220000	长春市	220100
000030	富奥股份	2021	3	4	B	70.02	C	59.79	B	74.26	B	73.72	C36	汽车制造业	吉林省	220000	长春市	220100
000030	富奥股份	2021	4	3	CCC	69.62	C	59.79	B	73.37	B	73.45	C36	汽车制造业	吉林省	220000	长春市	220100
000030	富奥股份	2022	1	4	B	70.24	C	59.79	B	73.37	BB	75.04	C36	汽车制造业	吉林省	220000	长春市	220100
000030	富奥股份	2022	2	4	B	70.92	C	59.79	B	73.49	BB	76.68	C36	汽车制造业	吉林省	220000	长春市	220100
000030	富奥股份	2022	3	4	B	70.71	C	59.79	B	73.23	BB	76.37	C36	汽车制造业	吉林省	220000	长春市	220100
000030	富奥股份	2022	4	4	B	71.33	C	59.79	B	73.23	BB	77.95	C36	汽车制造业	吉林省	220000	长春市	220100
000030	富奥股份	2023	1	4	B	70.18	C	59.79	B	73.23	B	74.99	C36	汽车制造业	吉林省	220000	长春市	220100
000030	富奥股份	2023	2	4	B	70.05	CC	60.21	B	74	B	73.72	C36	汽车制造业	吉林省	220000	长春市	220100
000030	富奥股份	2023	3	4	B	70.05	CC	60.21	B	74	B	73.72	C36	汽车制造业	吉林省	220000	长春市	220100
000030	富奥股份	2023	4	4	B	70.26	CC	60.21	B	74.26	B	74.03	C36	汽车制造业	吉林省	220000	长春市	220100
000030	富奥股份	2024	1	3	CCC	69.55	CC	60.21	B	74.26	B	72.22	C36	汽车制造业	吉林省	220000	长春市	220100
000030	富奥股份	2024	2	6	BBB	83.56	B	73.17	BB	79.94	BBB	81.4	C36	汽车制造业	吉林省	220000	长春市	220100
000030	富奥股份	2024	3	6	BBB	80.55	BB	76.53	BB	77.94	BBB	84.09	C36	汽车制造业	吉林省	220000	长春市	220100
000030	富奥股份	2024	4	5	BB	79.91	BB	76.35	BB	76.95	BBB	83.15	C36	汽车制造业	吉林省	220000	长春市	220100
000031	中粮地产	2009	1	6	BBB	80.09	CC	60.68	A	88.03	BB	78.98	K70	房地产业	广东省	440000	深圳市	440300
000031	中粮地产	2009	2	5	BB	79.89	CC	64.05	A	89.19	BB	76.31	K70	房地产业	广东省	440000	深圳市	440300
000031	中粮地产	2009	3	6	BBB	80.67	CC	64.05	A	89.19	BB	78.09	K70	房地产业	广东省	440000	深圳市	440300
000031	中粮地产	2009	4	6	BBB	80.51	CC	64.05	A	89.19	BB	77.71	K70	房地产业	广东省	440000	深圳市	440300
000031	中粮地产	2010	1	6	BBB	81.9	CC	64.05	A	89.19	BBB	80.89	K70	房地产业	广东省	440000	深圳市	440300
000031	中粮地产	2010	2	5	BB	78.61	CC	62.03	BBB	82.93	BB	80	K70	房地产业	广东省	440000	深圳市	440300
000031	中粮地产	2010	3	5	BB	78.61	CC	62.03	BBB	82.93	BB	80	K70	房地产业	广东省	440000	深圳市	440300
000031	中粮地产	2010	4	5	BB	79.45	CC	62.03	BBB	82.93	BBB	81.91	K70	房地产业	广东省	440000	深圳市	440300
000031	中粮地产	2011	1	6	BBB	80.07	CC	62.03	BBB	82.93	BBB	83.3	K70	房地产业	广东省	440000	深圳市	440300
000031	中粮地产	2011	2	6	BBB	80.03	CCC	69.23	A	85.69	BB	78.22	K70	房地产业	广东省	440000	深圳市	440300
000031	中粮地产	2011	3	6	BBB	80.64	CCC	69.23	A	85.69	BB	79.62	K70	房地产业	广东省	440000	深圳市	440300
000031	中粮地产	2011	4	6	BBB	81.25	CCC	69.23	A	85.69	BBB	81.02	K70	房地产业	广东省	440000	深圳市	440300
000031	中粮地产	2012	1	6	BBB	81.25	CCC	69.23	A	85.69	BBB	81.02	K70	房地产业	广东省	440000	深圳市	440300
000031	中粮地产	2012	2	6	BBB	80.87	CC	63.83	AA	90.54	BB	77.33	K70	房地产业	广东省	440000	深圳市	440300
000031	中粮地产	2012	3	6	BBB	81.26	CC	63.83	AA	90.54	BB	78.22	K70	房地产业	广东省	440000	深圳市	440300
000031	中粮地产	2012	4	6	BBB	81.26	CC	63.83	AA	90.54	BB	78.22	K70	房地产业	广东省	440000	深圳市	440300
000031	中粮地产	2013	1	6	BBB	81.26	CC	63.83	AA	90.54	BB	78.22	K70	房地产业	广东省	440000	深圳市	440300
000031	中粮地产	2013	2	6	BBB	81.59	CC	64.05	AA	92.21	BB	77.33	K70	房地产业	广东省	440000	深圳市	440300
000031	中粮地产	2013	3	6	BBB	80.9	CC	64.05	AA	90.54	BB	77.33	K70	房地产业	广东省	440000	深圳市	440300
000031	中粮地产	2013	4	6	BBB	81.51	CC	64.05	AA	90.54	BB	78.73	K70	房地产业	广东省	440000	深圳市	440300
000031	中粮地产	2014	1	6	BBB	81.51	CC	64.05	AA	90.54	BB	78.73	K70	房地产业	广东省	440000	深圳市	440300
000031	中粮地产	2014	2	5	BB	79.72	C	58.88	A	88.03	BB	78.73	K70	房地产业	广东省	440000	深圳市	440300
000031	中粮地产	2014	3	5	BB	78.41	C	58.88	A	86.36	BB	77.33	K70	房地产业	广东省	440000	深圳市	440300
000031	中粮地产	2014	4	6	BBB	80.03	C	58.88	A	86.36	BBB	81.02	K70	房地产业	广东省	440000	深圳市	440300
000031	中粮地产	2015	1	6	BBB	80.03	C	58.88	A	86.36	BBB	81.02	K70	房地产业	广东省	440000	深圳市	440300
000031	中粮地产	2015	2	5	BB	79.51	CC	60.45	BBB	83.6	BBB	81.91	K70	房地产业	广东省	440000	深圳市	440300
000031	中粮地产	2015	3	5	BB	79.51	CC	60.45	BBB	83.6	BBB	81.91	K70	房地产业	广东省	440000	深圳市	440300
000031	中粮地产	2015	4	5	BB	79.11	CC	60.45	BBB	83.6	BBB	81.02	K70	房地产业	广东省	440000	深圳市	440300
000031	中粮地产	2016	1	5	BB	79.51	CC	60.45	BBB	83.6	BBB	81.91	K70	房地产业	广东省	440000	深圳市	440300
000031	中粮地产	2016	2	5	BB	79.52	CC	62.03	BBB	84.02	BBB	81.02	K70	房地产业	广东省	440000	深圳市	440300
000031	中粮地产	2016	3	5	BB	79.91	CC	62.03	BBB	84.02	BBB	81.91	K70	房地产业	广东省	440000	深圳市	440300
000031	中粮地产	2016	4	5	BB	79.52	CC	62.03	BBB	84.02	BBB	81.02	K70	房地产业	广东省	440000	深圳市	440300
000031	中粮地产	2017	1	6	BBB	80.75	CC	62.03	BBB	84.02	BBB	83.81	K70	房地产业	广东省	440000	深圳市	440300
000031	中粮地产	2017	2	6	BBB	83.22	CCC	68.33	A	87.78	BBB	83.81	K70	房地产业	广东省	440000	深圳市	440300
000031	中粮地产	2017	3	6	BBB	81.99	CCC	68.33	A	87.78	BBB	81.02	K70	房地产业	广东省	440000	深圳市	440300
000031	中粮地产	2017	4	6	BBB	81.6	CCC	68.33	A	87.78	BBB	80.13	K70	房地产业	广东省	440000	深圳市	440300
000031	大悦城	2018	1	6	BBB	81.6	CCC	68.33	A	87.78	BBB	80.13	K70	房地产业	广东省	440000	深圳市	440300
000031	大悦城	2018	2	6	BBB	81.64	CC	62.48	A	89.37	BBB	80.64	K70	房地产业	广东省	440000	深圳市	440300
000031	大悦城	2018	3	6	BBB	81.41	CC	62.48	A	89.37	BBB	80.13	K70	房地产业	广东省	440000	深圳市	440300
000031	大悦城	2018	4	6	BBB	81.41	CC	62.48	A	89.37	BBB	80.13	K70	房地产业	广东省	440000	深圳市	440300
000031	大悦城	2019	1	6	BBB	82.42	CC	62.48	A	89.37	BBB	82.41	K70	房地产业	广东省	440000	深圳市	440300
000031	大悦城	2019	2	6	BBB	82.64	CC	60.81	AA	93.04	BBB	80	K70	房地产业	广东省	440000	深圳市	440300
000031	大悦城	2019	3	6	BBB	83.71	CC	60.81	AA	93.04	BBB	82.41	K70	房地产业	广东省	440000	深圳市	440300
000031	大悦城	2019	4	6	BBB	83.92	CC	60.81	AA	92.62	BBB	83.3	K70	房地产业	广东省	440000	深圳市	440300
000031	大悦城	2020	1	6	BBB	83.92	CC	60.81	AA	92.62	BBB	83.3	K70	房地产业	广东省	440000	深圳市	440300
000031	大悦城	2020	2	6	BBB	84.16	CCC	68.55	AA	93.46	BBB	80.51	K70	房地产业	广东省	440000	深圳市	440300
000031	大悦城	2020	3	7	A	85.68	CCC	67.88	AA	93.46	BBB	84.19	K70	房地产业	广东省	440000	深圳市	440300
000031	大悦城	2020	4	7	A	85.86	CCC	67.88	AA	93.88	BBB	84.19	K70	房地产业	广东省	440000	深圳市	440300
000031	大悦城	2021	1	7	A	85.86	CCC	67.88	AA	93.88	BBB	84.19	K70	房地产业	广东省	440000	深圳市	440300
000031	大悦城	2021	2	4	B	74.38	CCC	68.08	BB	77.39	BB	77.04	K70	房地产业	广东省	440000	深圳市	440300
000031	大悦城	2021	3	4	B	74.38	CCC	68.08	BB	77.39	BB	77.04	K70	房地产业	广东省	440000	深圳市	440300
000031	大悦城	2021	4	4	B	74.17	CCC	68.08	BB	77.1	BB	76.72	K70	房地产业	广东省	440000	深圳市	440300
000031	大悦城	2022	1	4	B	74.17	CCC	68.08	BB	77.1	BB	76.72	K70	房地产业	广东省	440000	深圳市	440300
000031	大悦城	2022	2	5	BB	75.14	B	70.89	BB	77.45	BB	76.72	K70	房地产业	广东省	440000	深圳市	440300
000031	大悦城	2022	3	5	BB	75.08	B	70.89	BB	77.45	BB	76.58	K70	房地产业	广东省	440000	深圳市	440300
000031	大悦城	2022	4	4	B	74.26	B	70.89	BB	77.16	B	74.72	K70	房地产业	广东省	440000	深圳市	440300
000031	大悦城	2023	1	4	B	73.85	B	70.9	BB	77.16	B	73.66	K70	房地产业	广东省	440000	深圳市	440300
000031	大悦城	2023	2	4	B	74.63	B	71.35	BB	76.87	BB	75.52	K70	房地产业	广东省	440000	深圳市	440300
000031	大悦城	2023	3	5	BB	75.11	B	71.35	BB	76.87	BB	76.72	K70	房地产业	广东省	440000	深圳市	440300
000031	大悦城	2023	4	5	BB	76.22	B	71.35	BB	76.59	BB	79.76	K70	房地产业	广东省	440000	深圳市	440300
000031	大悦城	2024	1	5	BB	75.71	B	71.35	BB	76.59	BB	78.46	K70	房地产业	广东省	440000	深圳市	440300
000031	大悦城	2024	2	5	BB	75.53	B	72.18	BBB	80.7	BBB	80.3	K70	房地产业	广东省	440000	深圳市	440300
000031	大悦城	2024	3	5	BB	77.04	BB	78.44	BB	78.57	BB	77.83	K70	房地产业	广东省	440000	深圳市	440300
000031	大悦城	2024	4	5	BB	78.4	BB	79.93	BB	78.57	BB	79.35	K70	房地产业	广东省	440000	深圳市	440300
000032	深桑达A	2009	1	5	BB	79.02	CCC	68.76	AA	90.23	BB	79.72	C39	计算机、通信和其他电子设备制造业	广东省	440000	深圳市	440300
000032	深桑达A	2009	2	4	B	70.52	C	55.34	BB	75.58	BB	75.34	C39	计算机、通信和其他电子设备制造业	广东省	440000	深圳市	440300
000032	深桑达A	2009	3	4	B	70.91	C	55.34	BB	75.58	BB	76.03	C39	计算机、通信和其他电子设备制造业	广东省	440000	深圳市	440300
000032	深桑达A	2009	4	4	B	74.25	C	55.34	BB	75.58	BBB	81.9	C39	计算机、通信和其他电子设备制造业	广东省	440000	深圳市	440300
000032	深桑达A	2010	1	4	B	73.42	C	55.34	BB	75.58	BBB	80.43	C39	计算机、通信和其他电子设备制造业	广东省	440000	深圳市	440300
000032	深桑达A	2010	2	3	CCC	68	C	53.35	BB	75.58	B	71.78	C39	计算机、通信和其他电子设备制造业	广东省	440000	深圳市	440300
000032	深桑达A	2010	3	3	CCC	69.67	C	53.35	BB	75.58	B	74.71	C39	计算机、通信和其他电子设备制造业	广东省	440000	深圳市	440300
000032	深桑达A	2010	4	4	B	72.62	C	53.35	BB	75.58	BB	79.88	C39	计算机、通信和其他电子设备制造业	广东省	440000	深圳市	440300
000032	深桑达A	2011	1	4	B	71.78	C	53.35	BB	75.58	BB	78.41	C39	计算机、通信和其他电子设备制造业	广东省	440000	深圳市	440300
000032	深桑达A	2011	2	4	B	73.05	C	53.54	AAA	100	B	72.55	C39	计算机、通信和其他电子设备制造业	广东省	440000	深圳市	440300
000032	深桑达A	2011	3	4	B	73.05	C	53.54	AAA	100	B	72.55	C39	计算机、通信和其他电子设备制造业	广东省	440000	深圳市	440300
000032	深桑达A	2011	4	4	B	74.33	C	53.54	AAA	100	B	74.79	C39	计算机、通信和其他电子设备制造业	广东省	440000	深圳市	440300
000032	深桑达A	2012	1	4	B	74.33	C	53.54	AAA	100	B	74.79	C39	计算机、通信和其他电子设备制造业	广东省	440000	深圳市	440300
000032	深桑达A	2012	2	3	CCC	69.72	C	53.54	BB	75.58	B	74.71	C39	计算机、通信和其他电子设备制造业	广东省	440000	深圳市	440300
000032	深桑达A	2012	3	3	CCC	69.72	C	53.54	BB	75.58	B	74.71	C39	计算机、通信和其他电子设备制造业	广东省	440000	深圳市	440300
000032	深桑达A	2012	4	3	CCC	69.32	C	53.54	BB	75.58	B	74.01	C39	计算机、通信和其他电子设备制造业	广东省	440000	深圳市	440300
000032	深桑达A	2013	1	3	CCC	69.32	C	53.54	BB	75.58	B	74.01	C39	计算机、通信和其他电子设备制造业	广东省	440000	深圳市	440300
000032	深桑达A	2013	2	4	B	74.94	C	59.31	BBB	80.46	BB	79.8	C39	计算机、通信和其他电子设备制造业	广东省	440000	深圳市	440300
000032	深桑达A	2013	3	4	B	74.94	C	59.31	BBB	80.46	BB	79.8	C39	计算机、通信和其他电子设备制造业	广东省	440000	深圳市	440300
000032	深桑达A	2013	4	5	BB	75.33	C	59.31	BBB	80.46	BBB	80.49	C39	计算机、通信和其他电子设备制造业	广东省	440000	深圳市	440300
000032	深桑达A	2014	1	5	BB	75.33	C	59.31	BBB	80.46	BBB	80.49	C39	计算机、通信和其他电子设备制造业	广东省	440000	深圳市	440300
000032	深桑达A	2014	2	5	BB	76.64	C	59.31	A	85.35	BBB	81.19	C39	计算机、通信和其他电子设备制造业	广东省	440000	深圳市	440300
000032	深桑达A	2014	3	5	BB	76.25	C	59.31	A	85.35	BBB	80.49	C39	计算机、通信和其他电子设备制造业	广东省	440000	深圳市	440300
000032	深桑达A	2014	4	5	BB	75.41	C	59.31	A	85.35	BB	79.03	C39	计算机、通信和其他电子设备制造业	广东省	440000	深圳市	440300
000032	深桑达A	2015	1	5	BB	75.41	C	59.31	A	85.35	BB	79.03	F51	批发业	广东省	440000	深圳市	440300
000032	深桑达A	2015	2	4	B	73.22	C	59.31	BBB	80.46	BB	76.79	F51	批发业	广东省	440000	深圳市	440300
000032	深桑达A	2015	3	4	B	72.83	C	59.31	BBB	80.46	BB	76.1	F51	批发业	广东省	440000	深圳市	440300
000032	深桑达A	2015	4	4	B	74.5	C	59.31	BBB	80.46	BB	79.03	F51	批发业	广东省	440000	深圳市	440300
000032	深桑达A	2016	1	4	B	74.89	C	59.31	BBB	80.46	BB	79.72	F51	批发业	广东省	440000	深圳市	440300
000032	深桑达A	2016	2	5	BB	77.97	B	70.66	AAA	100	B	73.86	F51	批发业	广东省	440000	深圳市	440300
000032	深桑达A	2016	3	5	BB	77.97	B	70.66	AAA	100	B	73.86	F51	批发业	广东省	440000	深圳市	440300
000032	深桑达A	2016	4	5	BB	77.97	B	70.66	AAA	100	B	73.86	F51	批发业	广东省	440000	深圳市	440300
000032	深桑达A	2017	1	5	BB	77.97	B	70.66	AAA	100	B	73.86	F51	批发业	广东省	440000	深圳市	440300
000032	深桑达A	2017	2	5	BB	75.36	B	71.22	A	85.35	B	73.86	F51	批发业	广东省	440000	深圳市	440300
000032	深桑达A	2017	3	5	BB	75.36	B	71.22	A	85.35	B	73.86	F51	批发业	广东省	440000	深圳市	440300
000032	深桑达A	2017	4	5	BB	78.7	B	71.22	A	85.35	BB	79.72	F51	批发业	广东省	440000	深圳市	440300
000032	深桑达A	2018	1	5	BB	79.54	B	71.22	A	85.35	BBB	81.19	F51	批发业	广东省	440000	深圳市	440300
000032	深桑达A	2018	2	5	BB	77.71	B	71.22	BB	75.58	BBB	81.19	F51	批发业	广东省	440000	深圳市	440300
000032	深桑达A	2018	3	5	BB	76.66	B	71.22	BB	75.58	BB	79.34	F51	批发业	广东省	440000	深圳市	440300
000032	深桑达A	2018	4	5	BB	76.66	B	71.22	BB	75.58	BB	79.34	F51	批发业	广东省	440000	深圳市	440300
000032	深桑达A	2019	1	5	BB	76.66	B	71.22	BB	75.58	BB	79.34	F51	批发业	广东省	440000	深圳市	440300
000032	深桑达A	2019	2	5	BB	76.2	CCC	69.33	BB	75.58	BB	79.34	F51	批发业	广东省	440000	深圳市	440300
000032	深桑达A	2019	3	5	BB	76.2	CCC	69.33	BB	75.58	BB	79.34	F51	批发业	广东省	440000	深圳市	440300
000032	深桑达A	2019	4	5	BB	76.2	CCC	69.33	BB	75.58	BB	79.34	F51	批发业	广东省	440000	深圳市	440300
000032	深桑达A	2020	1	5	BB	76.2	CCC	69.33	BB	75.58	BB	79.34	F51	批发业	广东省	440000	深圳市	440300
000032	深桑达A	2020	2	5	BB	77.11	CCC	69.33	BBB	80.46	BB	79.34	F51	批发业	广东省	440000	深圳市	440300
000032	深桑达A	2020	3	5	BB	77.11	CCC	69.33	BBB	80.46	BB	79.34	F51	批发业	广东省	440000	深圳市	440300
000032	深桑达A	2020	4	5	BB	77.51	CCC	69.33	BBB	80.46	BBB	80.03	F51	批发业	广东省	440000	深圳市	440300
000032	深桑达A	2021	1	5	BB	77.51	CCC	69.33	BBB	80.46	BBB	80.03	E49	建筑安装业	广东省	440000	深圳市	440300
000032	深桑达A	2021	2	5	BB	76.06	CCC	68.08	BB	77.86	BB	78.92	E49	建筑安装业	广东省	440000	深圳市	440300
000032	深桑达A	2021	3	5	BB	75.68	CCC	68.08	BB	77.86	BB	78.05	E49	建筑安装业	广东省	440000	深圳市	440300
000032	深桑达A	2021	4	4	B	74.11	CCC	68.08	BB	77.24	B	74.98	E49	建筑安装业	广东省	440000	深圳市	440300
000032	深桑达A	2022	1	4	B	73.43	CCC	68.08	BB	75.15	B	74.98	E49	建筑安装业	广东省	440000	深圳市	440300
000032	深桑达A	2022	2	4	B	73.99	CCC	68.08	BB	79.06	B	73.41	E49	建筑安装业	广东省	440000	深圳市	440300
000032	深桑达A	2022	3	4	B	74.7	CCC	68.08	BB	79.06	BB	75	E49	建筑安装业	广东省	440000	深圳市	440300
000032	深桑达A	2022	4	4	B	74.73	CCC	68.08	BB	79.68	B	74.62	E49	建筑安装业	广东省	440000	深圳市	440300
000032	深桑达A	2023	1	4	B	73.31	CCC	68.08	BB	79.68	B	71.44	E49	建筑安装业	广东省	440000	深圳市	440300
000032	深桑达A	2023	2	5	BB	75.62	CCC	68.08	BBB	80.86	BB	75.75	E49	建筑安装业	广东省	440000	深圳市	440300
000032	深桑达A	2023	3	4	B	74.81	CCC	68.08	BB	79.4	BB	75.01	E49	建筑安装业	广东省	440000	深圳市	440300
000032	深桑达A	2023	4	4	B	74.29	CCC	68.08	BB	79.4	B	73.82	E49	建筑安装业	广东省	440000	深圳市	440300
000032	深桑达A	2024	1	4	B	74.67	CCC	68.08	BB	79.4	B	74.69	E49	建筑安装业	广东省	440000	深圳市	440300
000032	深桑达A	2024	2	5	BB	79.27	CCC	67.94	BB	79.44	BB	79.32	E49	建筑安装业	广东省	440000	深圳市	440300
000032	深桑达A	2024	3	5	BB	75.12	CCC	67.11	BBB	82.94	BB	79.12	E49	建筑安装业	广东省	440000	深圳市	440300
000032	深桑达A	2024	4	4	B	72.6	CCC	66.14	BBB	82.33	BB	76.9	E49	建筑安装业	广东省	440000	深圳市	440300
000034	*ST 深泰	2009	1	2	CC	62.22	C	45.69	BB	75.58	CC	64.9	S90	综合	广东省	440000	深圳市	440300
000034	*ST 深泰	2009	2	2	CC	64.53	C	59.22	BB	75.58	CC	63.17	S90	综合	广东省	440000	深圳市	440300
000034	*ST 深泰	2009	3	2	CC	64.53	C	59.22	BB	75.58	CC	63.17	S90	综合	广东省	440000	深圳市	440300
000034	*ST 深泰	2009	4	3	CCC	69.54	C	59.22	BB	75.58	B	71.97	S90	综合	广东省	440000	深圳市	440300
000034	ST 深泰	2010	1	3	CCC	69.93	C	59.22	BB	75.58	B	72.66	S90	综合	广东省	440000	深圳市	440300
000034	ST 深泰	2010	2	4	B	73.53	C	59.31	AAA	95.12	B	72.52	S90	综合	广东省	440000	深圳市	440300
000034	ST 深泰	2010	3	4	B	73.53	C	59.31	AAA	95.12	B	72.52	S90	综合	广东省	440000	深圳市	440300
000034	ST 深泰	2010	4	5	BB	75.2	C	59.31	AAA	95.12	BB	75.45	S90	综合	广东省	440000	深圳市	440300
000034	深信泰丰	2011	1	4	B	74.41	C	59.31	AAA	95.12	B	74.06	S90	综合	广东省	440000	深圳市	440300
000034	深信泰丰	2011	2	4	B	71	C	45.69	AAA	95.12	B	73.91	S90	综合	广东省	440000	深圳市	440300
000034	深信泰丰	2011	3	4	B	71.89	C	45.69	AAA	95.12	BB	75.47	S90	综合	广东省	440000	深圳市	440300
000034	深信泰丰	2011	4	4	B	71.5	C	45.69	AAA	95.12	B	74.77	S90	综合	广东省	440000	深圳市	440300
000034	深信泰丰	2012	1	4	B	71.5	C	45.69	AAA	95.12	B	74.77	S90	综合	广东省	440000	深圳市	440300
000034	深信泰丰	2012	2	4	B	70.18	C	51.55	BBB	80.46	B	74.77	S90	综合	广东省	440000	深圳市	440300
000034	深信泰丰	2012	3	4	B	70.88	C	51.55	BBB	80.46	BB	75.99	S90	综合	广东省	440000	深圳市	440300
000034	深信泰丰	2012	4	4	B	70.09	C	51.55	BBB	80.46	B	74.6	S90	综合	广东省	440000	深圳市	440300
000034	深信泰丰	2013	1	4	B	71.27	C	51.55	BBB	80.46	BB	76.68	S90	综合	广东省	440000	深圳市	440300
000034	深信泰丰	2013	2	5	BB	77.16	CC	62.99	AA	90.23	BB	78.92	S90	综合	广东省	440000	深圳市	440300
000034	深信泰丰	2013	3	5	BB	76.96	CC	62.99	AA	90.23	BB	78.57	S90	综合	广东省	440000	深圳市	440300
000034	深信泰丰	2013	4	5	BB	75.29	CC	62.99	AA	90.23	BB	75.64	S90	综合	广东省	440000	深圳市	440300
000034	深信泰丰	2014	1	4	B	74.5	CC	62.99	AA	90.23	B	74.25	S90	综合	广东省	440000	深圳市	440300
000034	深信泰丰	2014	2	5	BB	78.31	B	70.66	A	85.35	BB	79.27	S90	综合	广东省	440000	深圳市	440300
000034	深信泰丰	2014	3	5	BB	78.31	B	70.66	A	85.35	BB	79.27	S90	综合	广东省	440000	深圳市	440300
000034	深信泰丰	2014	4	5	BB	78.31	B	70.66	A	85.35	BB	79.27	S90	综合	广东省	440000	深圳市	440300
000034	深信泰丰	2015	1	5	BB	78.31	B	70.66	A	85.35	BB	79.27	S90	综合	广东省	440000	深圳市	440300
000034	深信泰丰	2015	2	5	BB	77.91	B	70.66	A	85.35	BB	78.57	S90	综合	广东省	440000	深圳市	440300
000034	深信泰丰	2015	3	5	BB	77.91	B	70.66	A	85.35	BB	78.57	S90	综合	广东省	440000	深圳市	440300
000034	深信泰丰	2015	4	5	BB	77.91	B	70.66	A	85.35	BB	78.57	S90	综合	广东省	440000	深圳市	440300
000034	神州数码	2016	1	5	BB	77.91	B	70.66	A	85.35	BB	78.57	F51	批发业	广东省	440000	深圳市	440300
000034	神州数码	2016	2	5	BB	76.72	CCC	66.78	BB	75.58	BBB	81.35	F51	批发业	广东省	440000	深圳市	440300
000034	神州数码	2016	3	5	BB	75.14	CCC	66.78	BB	75.58	BB	78.57	F51	批发业	广东省	440000	深圳市	440300
000034	神州数码	2016	4	4	B	72.29	CCC	66.78	BB	75.58	B	73.56	F51	批发业	广东省	440000	深圳市	440300
000034	神州数码	2017	1	4	B	72.29	CCC	66.78	BB	75.58	B	73.56	F51	批发业	广东省	440000	深圳市	440300
000034	神州数码	2017	2	4	B	70.67	C	48.24	AAA	100	B	70.63	F51	批发业	广东省	440000	深圳市	440300
000034	神州数码	2017	3	4	B	70.67	C	48.24	AAA	100	B	70.63	F51	批发业	广东省	440000	深圳市	440300
000034	神州数码	2017	4	4	B	74.01	C	48.24	AAA	100	BB	76.49	F51	批发业	广东省	440000	深圳市	440300
000034	神州数码	2018	1	4	B	73.61	C	48.24	AAA	100	BB	75.8	F51	批发业	广东省	440000	深圳市	440300
000034	神州数码	2018	2	4	B	72.22	C	46.26	AAA	95.12	BB	75.8	F51	批发业	广东省	440000	深圳市	440300
000034	神州数码	2018	3	4	B	71.16	C	46.26	AAA	95.12	B	73.95	F51	批发业	广东省	440000	深圳市	440300
000034	神州数码	2018	4	3	CCC	67.38	C	46.26	AAA	95.12	CCC	67.3	F51	批发业	广东省	440000	深圳市	440300
000034	神州数码	2019	1	3	CCC	67.38	C	46.26	AAA	95.12	CCC	67.3	F51	批发业	广东省	440000	深圳市	440300
000034	神州数码	2019	2	2	CC	64.24	C	46.26	BBB	80.46	CCC	66.61	F51	批发业	广东省	440000	深圳市	440300
000034	神州数码	2019	3	3	CCC	66.75	C	46.26	BBB	80.46	B	71.02	F51	批发业	广东省	440000	深圳市	440300
000034	神州数码	2019	4	3	CCC	68.82	C	46.26	BBB	80.46	B	74.64	F51	批发业	广东省	440000	深圳市	440300
000034	神州数码	2020	1	3	CCC	68.82	C	46.26	BBB	80.46	B	74.64	F51	批发业	广东省	440000	深圳市	440300
000034	神州数码	2020	2	3	CCC	69.73	C	46.26	A	85.35	B	74.64	F51	批发业	广东省	440000	深圳市	440300
000034	神州数码	2020	3	4	B	70.13	C	46.26	A	85.35	BB	75.34	F51	批发业	广东省	440000	深圳市	440300
000034	神州数码	2020	4	4	B	70.13	C	46.26	A	85.35	BB	75.34	F51	批发业	广东省	440000	深圳市	440300
000034	神州数码	2021	1	4	B	70.13	C	46.26	A	85.35	BB	75.34	F51	批发业	广东省	440000	深圳市	440300
000034	神州数码	2021	2	4	B	71.16	CCC	67.11	B	71.58	B	72.97	F51	批发业	广东省	440000	深圳市	440300
000034	神州数码	2021	3	4	B	71.07	CCC	67.11	B	71.28	B	72.97	F51	批发业	广东省	440000	深圳市	440300
000034	神州数码	2021	4	4	B	71.47	CCC	67.11	B	71.28	B	73.89	F51	批发业	广东省	440000	深圳市	440300
000034	神州数码	2022	1	4	B	70.36	CCC	67.11	B	71.28	B	71.39	F51	批发业	广东省	440000	深圳市	440300
000034	神州数码	2022	2	4	B	71.03	CCC	68.08	B	73.66	B	70.66	F51	批发业	广东省	440000	深圳市	440300
000034	神州数码	2022	3	4	B	71.24	CCC	68.08	B	73.36	B	71.34	F51	批发业	广东省	440000	深圳市	440300
000034	神州数码	2022	4	4	B	71.24	CCC	68.08	B	73.36	B	71.34	F51	批发业	广东省	440000	深圳市	440300
000034	神州数码	2023	1	4	B	71.53	CCC	68.08	B	74.27	B	71.34	F51	批发业	广东省	440000	深圳市	440300
000034	神州数码	2023	2	4	B	72.91	CCC	68.08	B	71.25	BB	76.63	F51	批发业	广东省	440000	深圳市	440300
000034	神州数码	2023	3	4	B	72.91	CCC	68.08	B	71.25	BB	76.63	F51	批发业	广东省	440000	深圳市	440300
000034	神州数码	2023	4	4	B	73.34	CCC	68.08	B	72.15	BB	76.92	F51	批发业	广东省	440000	深圳市	440300
000034	神州数码	2024	1	4	B	73.08	CCC	68.08	B	71.85	BB	76.56	F51	批发业	广东省	440000	深圳市	440300
000034	神州数码	2024	2	5	BB	75.63	CCC	67.94	B	73.25	BB	78.37	F51	批发业	广东省	440000	深圳市	440300
000034	神州数码	2024	3	4	B	70.85	B	70.44	B	74.21	BB	78.58	F51	批发业	广东省	440000	深圳市	440300
000034	神州数码	2024	4	3	CCC	67.93	CCC	65.17	B	73.25	BB	78.33	F51	批发业	广东省	440000	深圳市	440300
000035	ST 科健	2009	1	3	CCC	67.27	C	59.6	C	56.49	BB	78.74	C39	计算机、通信和其他电子设备制造业	广东省	440000	深圳市	440300
000035	ST 科健	2009	2	2	CC	62.14	C	54.44	C	54.62	B	71.11	C39	计算机、通信和其他电子设备制造业	广东省	440000	深圳市	440300
000035	ST 科健	2009	3	2	CC	62.14	C	54.44	C	54.62	B	71.11	C39	计算机、通信和其他电子设备制造业	广东省	440000	深圳市	440300
000035	ST 科健	2009	4	2	CC	62.14	C	54.44	C	54.62	B	71.11	C39	计算机、通信和其他电子设备制造业	广东省	440000	深圳市	440300
000035	*ST 科健	2010	1	2	CC	62.14	C	54.44	C	54.62	B	71.11	C39	计算机、通信和其他电子设备制造业	广东省	440000	深圳市	440300
000035	*ST 科健	2010	2	2	CC	62.14	C	54.44	C	54.62	B	71.11	C39	计算机、通信和其他电子设备制造业	广东省	440000	深圳市	440300
000035	*ST 科健	2010	3	2	CC	62.14	C	54.44	C	54.62	B	71.11	C39	计算机、通信和其他电子设备制造业	广东省	440000	深圳市	440300
000035	*ST 科健	2010	4	2	CC	62.14	C	54.44	C	54.62	B	71.11	C39	计算机、通信和其他电子设备制造业	广东省	440000	深圳市	440300
000035	*ST 科健	2011	1	2	CC	62.14	C	54.44	C	54.62	B	71.11	C39	计算机、通信和其他电子设备制造业	广东省	440000	深圳市	440300
000035	*ST 科健	2011	2	2	CC	62.04	C	53.92	C	54.62	B	71.11	C39	计算机、通信和其他电子设备制造业	广东省	440000	深圳市	440300
000035	*ST 科健	2011	3	2	CC	62.04	C	53.92	C	54.62	B	71.11	C39	计算机、通信和其他电子设备制造业	广东省	440000	深圳市	440300
000035	*ST 科健	2011	4	2	CC	62.04	C	53.92	C	54.62	B	71.11	C39	计算机、通信和其他电子设备制造业	广东省	440000	深圳市	440300
000035	*ST 科健	2012	1	2	CC	62.04	C	53.92	C	54.62	B	71.11	C39	计算机、通信和其他电子设备制造业	广东省	440000	深圳市	440300
000035	*ST 科健	2012	2	2	CC	61.38	C	56.24	C	51.52	B	71.11	C39	计算机、通信和其他电子设备制造业	广东省	440000	深圳市	440300
000035	*ST 科健	2012	3	2	CC	61.38	C	56.24	C	51.52	B	71.11	C39	计算机、通信和其他电子设备制造业	广东省	440000	深圳市	440300
000035	*ST 科健	2012	4	2	CC	61.01	C	56.24	C	51.52	B	70.3	C39	计算机、通信和其他电子设备制造业	广东省	440000	深圳市	440300
000035	*ST 科健	2013	1	2	CC	61.01	C	56.24	C	51.52	B	70.3	C39	计算机、通信和其他电子设备制造业	广东省	440000	深圳市	440300
000035	*ST 科健	2013	2	2	CC	60.94	C	53.92	C	51.52	B	71.11	C39	计算机、通信和其他电子设备制造业	广东省	440000	深圳市	440300
000035	*ST 科健	2013	3	2	CC	63.72	C	53.92	C	51.52	BB	77.17	C39	计算机、通信和其他电子设备制造业	广东省	440000	深圳市	440300
000035	*ST 科健	2013	4	2	CC	63.72	C	53.92	C	51.52	BB	77.17	C39	计算机、通信和其他电子设备制造业	广东省	440000	深圳市	440300
000035	中国天楹	2014	1	2	CC	63.72	C	53.92	C	51.52	BB	77.17	N77	生态保护和环境治理业	江苏省	320000	南通市	320600
000035	中国天楹	2014	2	3	CCC	66.58	C	56.36	C	53.07	BBB	81.21	N77	生态保护和环境治理业	江苏省	320000	南通市	320600
000035	中国天楹	2014	3	3	CCC	66.58	C	56.36	C	53.07	BBB	81.21	N77	生态保护和环境治理业	江苏省	320000	南通市	320600
000035	中国天楹	2014	4	3	CCC	66.21	C	56.36	C	53.07	BBB	80.4	N77	生态保护和环境治理业	江苏省	320000	南通市	320600
000035	中国天楹	2015	1	3	CCC	65.84	C	56.36	C	53.07	BB	79.59	N77	生态保护和环境治理业	江苏省	320000	南通市	320600
000035	中国天楹	2015	2	5	BB	75.33	CCC	67.42	CCC	66.12	A	85.7	N77	生态保护和环境治理业	江苏省	320000	南通市	320600
000035	中国天楹	2015	3	5	BB	75.06	CCC	67.42	CCC	66.12	A	85.1	N77	生态保护和环境治理业	江苏省	320000	南通市	320600
000035	中国天楹	2015	4	5	BB	75.06	CCC	67.42	CCC	66.12	A	85.1	N77	生态保护和环境治理业	江苏省	320000	南通市	320600
000035	中国天楹	2016	1	5	BB	75.06	CCC	67.42	CCC	66.12	A	85.1	N77	生态保护和环境治理业	江苏省	320000	南通市	320600
000035	中国天楹	2016	2	5	BB	78.51	CCC	67.42	BB	75.91	A	85.1	N77	生态保护和环境治理业	江苏省	320000	南通市	320600
000035	中国天楹	2016	3	5	BB	78.79	CCC	67.42	BB	75.91	A	85.7	N77	生态保护和环境治理业	江苏省	320000	南通市	320600
000035	中国天楹	2016	4	5	BB	79.16	CCC	67.42	BB	75.91	A	86.51	N77	生态保护和环境治理业	江苏省	320000	南通市	320600
000035	中国天楹	2017	1	5	BB	78.42	CCC	67.42	BB	75.91	BBB	84.89	N77	生态保护和环境治理业	江苏省	320000	南通市	320600
000035	中国天楹	2017	2	5	BB	79.01	CCC	67.95	BB	77.31	BBB	84.89	N77	生态保护和环境治理业	江苏省	320000	南通市	320600
000035	中国天楹	2017	3	5	BB	79.2	CCC	67.95	BB	77.31	A	85.3	N77	生态保护和环境治理业	江苏省	320000	南通市	320600
000035	中国天楹	2017	4	5	BB	79.2	CCC	67.95	BB	77.31	A	85.3	N77	生态保护和环境治理业	江苏省	320000	南通市	320600
000035	中国天楹	2018	1	5	BB	79.2	CCC	67.95	BB	77.31	A	85.3	N77	生态保护和环境治理业	江苏省	320000	南通市	320600
000035	中国天楹	2018	2	6	BBB	80.18	CCC	67.95	BBB	80.1	A	85.3	N77	生态保护和环境治理业	江苏省	320000	南通市	320600
000035	中国天楹	2018	3	5	BB	79.2	CCC	67.95	BBB	80.1	BBB	83.14	N77	生态保护和环境治理业	江苏省	320000	南通市	320600
000035	中国天楹	2018	4	5	BB	79.2	CCC	67.95	BBB	80.1	BBB	83.14	N77	生态保护和环境治理业	江苏省	320000	南通市	320600
000035	中国天楹	2019	1	6	BBB	80.31	CCC	67.95	BBB	80.1	A	85.57	N77	生态保护和环境治理业	江苏省	320000	海安市	320685
000035	中国天楹	2019	2	6	BBB	80.04	CCC	68.47	BBB	80.1	BBB	84.76	N77	生态保护和环境治理业	江苏省	320000	海安市	320685
000035	中国天楹	2019	3	6	BBB	80.04	CCC	68.47	BBB	80.1	BBB	84.76	N77	生态保护和环境治理业	江苏省	320000	海安市	320685
000035	中国天楹	2019	4	5	BB	78.56	CCC	68.47	BB	75.91	BBB	84.76	N77	生态保护和环境治理业	江苏省	320000	海安市	320685
000035	中国天楹	2020	1	5	BB	78.56	CCC	68.47	BB	75.91	BBB	84.76	N77	生态保护和环境治理业	江苏省	320000	海安市	320685
000035	中国天楹	2020	2	5	BB	79.86	CCC	68.47	BB	78.55	A	85.57	N77	生态保护和环境治理业	江苏省	320000	海安市	320685
000035	中国天楹	2020	3	5	BB	79.49	CCC	68.47	BB	78.55	BBB	84.76	N77	生态保护和环境治理业	江苏省	320000	海安市	320685
000035	中国天楹	2020	4	5	BB	78.99	CCC	68.47	BB	77.15	BBB	84.76	N77	生态保护和环境治理业	江苏省	320000	海安市	320685
000035	中国天楹	2021	1	5	BB	78.53	CCC	67.95	BB	77.15	BBB	83.95	N77	生态保护和环境治理业	江苏省	320000	海安市	320685
000035	中国天楹	2021	2	5	BB	76.22	B	70.78	BBB	80.46	BB	78.04	N77	生态保护和环境治理业	江苏省	320000	海安市	320685
000035	中国天楹	2021	3	5	BB	76.22	B	70.78	BBB	80.46	BB	78.04	N77	生态保护和环境治理业	江苏省	320000	海安市	320685
000035	中国天楹	2021	4	5	BB	76.31	B	70.78	BBB	80.82	BB	78.04	N77	生态保护和环境治理业	江苏省	320000	海安市	320685
000035	中国天楹	2022	1	5	BB	76.31	B	70.78	BBB	80.82	BB	78.04	N77	生态保护和环境治理业	江苏省	320000	海安市	320685
000035	中国天楹	2022	2	4	B	72.61	C	57.45	BB	79.73	BBB	80.5	N77	生态保护和环境治理业	江苏省	320000	海安市	320685
000035	中国天楹	2022	3	4	B	72.61	C	57.45	BB	79.73	BBB	80.5	N77	生态保护和环境治理业	江苏省	320000	海安市	320685
000035	中国天楹	2022	4	4	B	72.78	C	57.45	BB	79.73	BBB	80.91	N77	生态保护和环境治理业	江苏省	320000	海安市	320685
000035	中国天楹	2023	1	4	B	72.5	C	57.45	BB	79.73	BBB	80.23	N77	生态保护和环境治理业	江苏省	320000	海安市	320685
000035	中国天楹	2023	2	4	B	74.3	CC	63.7	BBB	83.18	BB	77.5	N77	生态保护和环境治理业	江苏省	320000	海安市	320685
000035	中国天楹	2023	3	4	B	74.04	CC	63.7	BBB	83.18	BB	76.86	N77	生态保护和环境治理业	江苏省	320000	海安市	320685
000035	中国天楹	2023	4	4	B	71.56	CC	63.7	BBB	83.42	B	70.77	N77	生态保护和环境治理业	江苏省	320000	海安市	320685
000035	中国天楹	2024	1	4	B	72.7	CCC	66.5	BBB	83.42	B	71.28	N77	生态保护和环境治理业	江苏省	320000	海安市	320685
000035	中国天楹	2024	2	5	BB	79.16	B	71.89	A	85.83	B	74.81	N77	生态保护和环境治理业	江苏省	320000	海安市	320685
000035	中国天楹	2024	3	6	BBB	84.79	B	71.07	A	87.14	BBB	83.08	N77	生态保护和环境治理业	江苏省	320000	海安市	320685
000035	中国天楹	2024	4	6	BBB	82.55	B	71.5	A	87.14	BBB	82.17	N77	生态保护和环境治理业	江苏省	320000	海安市	320685
000036	*ST 华控	2009	1	4	B	74.25	C	58.04	B	72.88	BBB	80.9	C17	纺织业	广东省	440000	深圳市	440300
000036	*ST 华控	2009	2	4	B	73.53	CC	61.42	B	74.71	BB	76.39	C17	纺织业	广东省	440000	深圳市	440300
000036	*ST 华控	2009	3	4	B	73.3	CC	61.42	B	74.71	BB	75.88	C17	纺织业	广东省	440000	深圳市	440300
000036	*ST 华控	2009	4	4	B	74.18	CC	61.42	B	73.88	BB	78.68	C17	纺织业	广东省	440000	深圳市	440300
000036	华联控股	2010	1	4	B	74.18	CC	61.42	B	73.88	BB	78.68	K70	房地产业	广东省	440000	深圳市	440300
000036	华联控股	2010	2	5	BB	75.77	CC	63.22	BB	77.05	BB	78.69	K70	房地产业	广东省	440000	深圳市	440300
000036	华联控股	2010	3	5	BB	75.87	CC	63.22	BB	77.05	BB	78.91	K70	房地产业	广东省	440000	深圳市	440300
000036	华联控股	2010	4	5	BB	76.7	CC	63.22	BB	77.05	BBB	80.82	K70	房地产业	广东省	440000	深圳市	440300
000036	华联控股	2011	1	5	BB	76.7	CC	63.22	BB	77.05	BBB	80.82	K70	房地产业	广东省	440000	深圳市	440300
000036	华联控股	2011	2	5	BB	75.88	C	58.26	BB	76.8	BBB	80.82	K70	房地产业	广东省	440000	深圳市	440300
000036	华联控股	2011	3	5	BB	76.18	C	58.26	BB	76.8	BBB	81.48	K70	房地产业	广东省	440000	深圳市	440300
000036	华联控股	2011	4	5	BB	76.96	C	58.26	BB	76.8	BBB	83.26	K70	房地产业	广东省	440000	深圳市	440300
000036	华联控股	2012	1	5	BB	76.96	C	58.26	BB	76.8	BBB	83.26	K70	房地产业	广东省	440000	深圳市	440300
000036	华联控股	2012	2	6	BBB	80.17	C	56.47	A	85.16	BBB	83.26	K70	房地产业	广东省	440000	深圳市	440300
000036	华联控股	2012	3	6	BBB	80.37	C	56.47	A	85.16	BBB	83.71	K70	房地产业	广东省	440000	深圳市	440300
000036	华联控股	2012	4	6	BBB	80.37	C	56.47	A	85.16	BBB	83.71	K70	房地产业	广东省	440000	深圳市	440300
000036	华联控股	2013	1	6	BBB	80.37	C	56.47	A	85.16	BBB	83.71	K70	房地产业	广东省	440000	深圳市	440300
000036	华联控股	2013	2	4	B	74.88	C	58.26	B	74.3	BBB	80.91	K70	房地产业	广东省	440000	深圳市	440300
000036	华联控股	2013	3	4	B	74.88	C	58.26	B	74.3	BBB	80.91	K70	房地产业	广东省	440000	深圳市	440300
000036	华联控股	2013	4	5	BB	75.06	C	58.26	B	74.71	BBB	80.91	K70	房地产业	广东省	440000	深圳市	440300
000036	华联控股	2014	1	4	B	74.66	C	58.26	B	74.71	BBB	80.02	K70	房地产业	广东省	440000	深圳市	440300
000036	华联控股	2014	2	5	BB	77.05	CC	60.06	BB	78.89	BBB	80.91	K70	房地产业	广东省	440000	深圳市	440300
000036	华联控股	2014	3	5	BB	77.05	CC	60.06	BB	78.89	BBB	80.91	K70	房地产业	广东省	440000	深圳市	440300
000036	华联控股	2014	4	5	BB	76.66	CC	60.06	BB	78.89	BBB	80.02	K70	房地产业	广东省	440000	深圳市	440300
000036	华联控股	2015	1	5	BB	76.66	CC	60.06	BB	78.89	BBB	80.02	K70	房地产业	广东省	440000	深圳市	440300
000036	华联控股	2015	2	5	BB	78.39	C	56.69	A	85.16	BB	79.13	K70	房地产业	广东省	440000	深圳市	440300
000036	华联控股	2015	3	5	BB	78.39	C	56.69	A	85.16	BB	79.13	K70	房地产业	广东省	440000	深圳市	440300
000036	华联控股	2015	4	5	BB	78.78	C	56.69	A	85.16	BBB	80.02	K70	房地产业	广东省	440000	深圳市	440300
000036	华联控股	2016	1	5	BB	79.39	C	56.69	A	85.16	BBB	81.42	K70	房地产业	广东省	440000	深圳市	440300
000036	华联控股	2016	2	5	BB	79.24	C	54.67	A	85.49	BBB	81.42	K70	房地产业	广东省	440000	深圳市	440300
000036	华联控股	2016	3	5	BB	78.85	C	54.67	A	85.49	BBB	80.53	K70	房地产业	广东省	440000	深圳市	440300
000036	华联控股	2016	4	5	BB	78.63	C	54.67	A	85.91	BB	79.64	K70	房地产业	广东省	440000	深圳市	440300
000036	华联控股	2017	1	5	BB	78.24	C	54.67	A	85.91	BB	78.75	K70	房地产业	广东省	440000	深圳市	440300
000036	华联控股	2017	2	5	BB	79.07	C	57.37	A	87.91	BB	77.86	K70	房地产业	广东省	440000	深圳市	440300
000036	华联控股	2017	3	5	BB	79.86	C	57.37	A	87.91	BB	79.64	K70	房地产业	广东省	440000	深圳市	440300
000036	华联控股	2017	4	6	BBB	80.07	C	57.37	A	87.5	BBB	80.53	K70	房地产业	广东省	440000	深圳市	440300
000036	华联控股	2018	1	6	BBB	80.07	C	57.37	A	87.5	BBB	80.53	K70	房地产业	广东省	440000	深圳市	440300
000036	华联控股	2018	2	5	BB	75.77	C	57.14	BB	77.22	BBB	80.53	K70	房地产业	广东省	440000	深圳市	440300
000036	华联控股	2018	3	4	B	74.73	C	57.14	BB	77.22	BB	78.16	K70	房地产业	广东省	440000	深圳市	440300
000036	华联控股	2018	4	4	B	74.73	C	57.14	BB	77.22	BB	78.16	K70	房地产业	广东省	440000	深圳市	440300
000036	华联控股	2019	1	4	B	74.73	C	57.14	BB	77.22	BB	78.16	K70	房地产业	广东省	440000	深圳市	440300
000036	华联控股	2019	2	5	BB	78.79	C	58.94	BBB	82.48	BBB	81.84	K70	房地产业	广东省	440000	深圳市	440300
000036	华联控股	2019	3	5	BB	79.41	C	58.94	BBB	82.48	BBB	83.24	K70	房地产业	广东省	440000	深圳市	440300
000036	华联控股	2019	4	6	BBB	80.1	C	58.94	BBB	84.15	BBB	83.24	K70	房地产业	广东省	440000	深圳市	440300
000036	华联控股	2020	1	6	BBB	80.1	C	58.94	BBB	84.15	BBB	83.24	K70	房地产业	广东省	440000	深圳市	440300
000036	华联控股	2020	2	5	BB	77.06	C	57.14	BB	77.47	BBB	83.24	K70	房地产业	广东省	440000	深圳市	440300
000036	华联控股	2020	3	5	BB	77.06	C	57.14	BB	77.47	BBB	83.24	K70	房地产业	广东省	440000	深圳市	440300
000036	华联控股	2020	4	5	BB	77.06	C	57.14	BB	77.47	BBB	83.24	K70	房地产业	广东省	440000	深圳市	440300
000036	华联控股	2021	1	5	BB	77.45	C	57.14	BB	77.47	BBB	84.13	K70	房地产业	广东省	440000	深圳市	440300
000036	华联控股	2021	2	5	BB	75.23	CCC	65.5	BB	77.72	BBB	80.98	K70	房地产业	广东省	440000	深圳市	440300
000036	华联控股	2021	3	5	BB	75.23	CCC	65.5	BB	77.72	BBB	80.98	K70	房地产业	广东省	440000	深圳市	440300
000036	华联控股	2021	4	5	BB	75.32	CCC	65.5	BB	78.01	BBB	80.98	K70	房地产业	广东省	440000	深圳市	440300
000036	华联控股	2022	1	5	BB	75.94	CCC	65.5	BB	78.01	BBB	82.58	K70	房地产业	广东省	440000	深圳市	440300
000036	华联控股	2022	2	5	BB	75.91	CCC	65.5	BB	76.85	BBB	83.37	K70	房地产业	广东省	440000	深圳市	440300
000036	华联控股	2022	3	5	BB	75.91	CCC	65.5	BB	76.85	BBB	83.37	K70	房地产业	广东省	440000	深圳市	440300
000036	华联控股	2022	4	5	BB	75.81	CCC	65.5	BB	76.85	BBB	83.1	K70	房地产业	广东省	440000	深圳市	440300
000036	华联控股	2023	1	5	BB	75.81	CCC	65.5	BB	76.85	BBB	83.1	K70	房地产业	广东省	440000	深圳市	440300
000036	华联控股	2023	2	5	BB	75.09	CCC	65.5	BB	75.14	BBB	82.57	K70	房地产业	广东省	440000	深圳市	440300
000036	华联控股	2023	3	5	BB	75.47	CCC	68.08	BB	75.14	BBB	81.52	K70	房地产业	广东省	440000	深圳市	440300
000036	华联控股	2023	4	5	BB	76.64	CCC	68.08	BB	75.14	BBB	84.48	K70	房地产业	广东省	440000	深圳市	440300
000036	华联控股	2024	1	5	BB	76.83	CCC	68.08	BB	75.14	BBB	84.96	K70	房地产业	广东省	440000	深圳市	440300
000036	华联控股	2024	2	4	B	70.33	CCC	66.79	BB	75.88	BBB	81.5	K70	房地产业	广东省	440000	深圳市	440300
000036	华联控股	2024	3	3	CCC	69.72	CCC	68.08	BB	75.88	BB	78.51	K70	房地产业	广东省	440000	深圳市	440300
000036	华联控股	2024	4	3	CCC	67.28	CCC	66.14	BB	76.19	BB	78.12	K70	房地产业	广东省	440000	深圳市	440300
000037	深南电A	2009	1	3	CCC	67.06	C	56.47	C	56.25	BB	78.53	D44	电力、热力生产和供应业	广东省	440000	深圳市	440300
000037	深南电A	2009	2	3	CCC	66.57	C	59.77	C	59.14	B	74.24	D44	电力、热力生产和供应业	广东省	440000	深圳市	440300
000037	深南电A	2009	3	3	CCC	67.37	C	59.77	C	59.14	BB	75.89	D44	电力、热力生产和供应业	广东省	440000	深圳市	440300
000037	深南电A	2009	4	3	CCC	67.01	C	59.77	C	59.14	BB	75.13	D44	电力、热力生产和供应业	广东省	440000	深圳市	440300
000037	深南电A	2010	1	3	CCC	67.37	C	59.77	C	59.14	BB	75.89	D44	电力、热力生产和供应业	广东省	440000	深圳市	440300
000037	深南电A	2010	2	3	CCC	65.59	C	58.4	C	59.14	B	72.86	D44	电力、热力生产和供应业	广东省	440000	深圳市	440300
000037	深南电A	2010	3	3	CCC	65.59	C	58.4	C	59.14	B	72.86	D44	电力、热力生产和供应业	广东省	440000	深圳市	440300
000037	深南电A	2010	4	3	CCC	65.96	C	58.4	C	59.14	B	73.61	D44	电力、热力生产和供应业	广东省	440000	深圳市	440300
000037	深南电A	2011	1	3	CCC	66.39	C	58.4	C	59.14	B	74.51	D44	电力、热力生产和供应业	广东省	440000	深圳市	440300
000037	深南电A	2011	2	2	CC	64.69	C	59.77	C	59.14	B	70.34	D44	电力、热力生产和供应业	广东省	440000	深圳市	440300
000037	深南电A	2011	3	2	CC	63.6	C	59.77	C	59.14	CCC	68.07	D44	电力、热力生产和供应业	广东省	440000	深圳市	440300
000037	深南电A	2011	4	2	CC	63.96	C	59.77	C	59.14	CCC	68.83	D44	电力、热力生产和供应业	广东省	440000	深圳市	440300
000037	深南电A	2012	1	2	CC	63.96	C	59.77	C	59.14	CCC	68.83	D44	电力、热力生产和供应业	广东省	440000	深圳市	440300
000037	深南电A	2012	2	3	CCC	69.91	C	58.4	CC	64.41	BB	78.67	D44	电力、热力生产和供应业	广东省	440000	深圳市	440300
000037	深南电A	2012	3	3	CCC	68.82	C	58.4	CC	64.41	BB	76.4	D44	电力、热力生产和供应业	广东省	440000	深圳市	440300
000037	深南电A	2012	4	4	B	70.25	C	58.4	CCC	65.58	BB	78.67	D44	电力、热力生产和供应业	广东省	440000	深圳市	440300
000037	深南电A	2013	1	3	CCC	68.72	C	58.4	CCC	65.58	BB	75.51	D44	电力、热力生产和供应业	广东省	440000	深圳市	440300
000037	深南电A	2013	2	3	CCC	69.28	C	59.77	CCC	66.13	BB	75.7	D44	电力、热力生产和供应业	广东省	440000	深圳市	440300
000037	深南电A	2013	3	3	CCC	68.19	C	59.77	CCC	66.13	B	73.43	D44	电力、热力生产和供应业	广东省	440000	深圳市	440300
000037	深南电A	2013	4	3	CCC	69.28	C	59.77	CCC	66.13	BB	75.7	D44	电力、热力生产和供应业	广东省	440000	深圳市	440300
000037	深南电A	2014	1	3	CCC	68.62	C	59.77	CCC	66.13	B	74.32	D44	电力、热力生产和供应业	广东省	440000	深圳市	440300
000037	深南电A	2014	2	3	CCC	69.96	C	56.47	CCC	66.13	BB	78.67	D44	电力、热力生产和供应业	广东省	440000	深圳市	440300
000037	深南电A	2014	3	3	CCC	69.96	C	56.47	CCC	66.13	BB	78.67	D44	电力、热力生产和供应业	广东省	440000	深圳市	440300
000037	深南电A	2014	4	3	CCC	69.96	C	56.47	CCC	66.13	BB	78.67	D44	电力、热力生产和供应业	广东省	440000	深圳市	440300
000037	深南电A	2015	1	3	CCC	69.96	C	56.47	CCC	66.13	BB	78.67	D44	电力、热力生产和供应业	广东省	440000	深圳市	440300
000037	深南电A	2015	2	3	CCC	68.95	C	56.47	CCC	66.13	BB	76.59	D44	电力、热力生产和供应业	广东省	440000	深圳市	440300
000037	深南电A	2015	3	3	CCC	69.41	C	56.47	CCC	66.13	BB	77.54	D44	电力、热力生产和供应业	广东省	440000	深圳市	440300
000037	深南电A	2015	4	3	CCC	69.41	C	56.47	CCC	66.13	BB	77.54	D44	电力、热力生产和供应业	广东省	440000	深圳市	440300
000037	*ST 南电A	2016	1	3	CCC	69.41	C	56.47	CCC	66.13	BB	77.54	D44	电力、热力生产和供应业	广东省	440000	深圳市	440300
000037	*ST 南电A	2016	2	3	CCC	69.54	C	56.47	BB	77.12	B	71.29	D44	电力、热力生产和供应业	广东省	440000	深圳市	440300
000037	*ST 南电A	2016	3	3	CCC	69.45	C	56.47	BB	77.12	B	71.1	D44	电力、热力生产和供应业	广东省	440000	深圳市	440300
000037	*ST 南电A	2016	4	3	CCC	69.81	C	56.47	BB	77.12	B	71.86	D44	电力、热力生产和供应业	广东省	440000	深圳市	440300
000037	深南电A	2017	1	3	CCC	69.45	C	56.47	BB	77.12	B	71.1	D44	电力、热力生产和供应业	广东省	440000	深圳市	440300
000037	深南电A	2017	2	3	CCC	68.95	C	55.89	CC	63.25	BB	78.56	D44	电力、热力生产和供应业	广东省	440000	深圳市	440300
000037	深南电A	2017	3	3	CCC	69.13	C	55.89	CC	63.25	BB	78.94	D44	电力、热力生产和供应业	广东省	440000	深圳市	440300
000037	深南电A	2017	4	3	CCC	69.06	C	55.89	CC	63.25	BB	78.81	D44	电力、热力生产和供应业	广东省	440000	深圳市	440300
000037	深南电A	2018	1	3	CCC	67.84	C	55.89	CC	63.25	BB	76.26	D44	电力、热力生产和供应业	广东省	440000	深圳市	440300
000037	深南电A	2018	2	3	CCC	68.88	C	57.25	CC	63.25	BB	77.78	D44	电力、热力生产和供应业	广东省	440000	深圳市	440300
000037	深南电A	2018	3	3	CCC	67.91	C	57.25	CC	63.25	BB	75.76	D44	电力、热力生产和供应业	广东省	440000	深圳市	440300
000037	深南电A	2018	4	3	CCC	67.11	C	57.25	CC	63.25	B	74.11	D44	电力、热力生产和供应业	广东省	440000	深圳市	440300
000037	深南电A	2019	1	3	CCC	66.74	C	57.25	CC	63.25	B	73.35	D44	电力、热力生产和供应业	广东省	440000	深圳市	440300
000037	深南电A	2019	2	3	CCC	69.13	C	57.25	CCC	69.02	B	74.87	D44	电力、热力生产和供应业	广东省	440000	深圳市	440300
000037	深南电A	2019	3	3	CCC	69.13	C	57.25	CCC	69.02	B	74.87	D44	电力、热力生产和供应业	广东省	440000	深圳市	440300
000037	深南电A	2019	4	3	CCC	69.56	C	57.25	CCC	69.02	BB	75.76	D44	电力、热力生产和供应业	广东省	440000	深圳市	440300
000037	深南电A	2020	1	3	CCC	69.56	C	57.25	CCC	69.02	BB	75.76	D44	电力、热力生产和供应业	广东省	440000	深圳市	440300
000037	深南电A	2020	2	3	CCC	68.73	C	57.25	CCC	66.13	BB	75.76	D44	电力、热力生产和供应业	广东省	440000	深圳市	440300
000037	深南电A	2020	3	3	CCC	68.73	C	57.25	CCC	66.13	BB	75.76	D44	电力、热力生产和供应业	广东省	440000	深圳市	440300
000037	深南电A	2020	4	3	CCC	69.16	C	57.25	CCC	66.13	BB	76.65	D44	电力、热力生产和供应业	广东省	440000	深圳市	440300
000037	深南电A	2021	1	3	CCC	69.16	C	57.25	CCC	66.13	BB	76.65	D44	电力、热力生产和供应业	广东省	440000	深圳市	440300
000037	深南电A	2021	2	4	B	71.2	CC	63.35	CCC	69.16	BBB	80.84	D44	电力、热力生产和供应业	广东省	440000	深圳市	440300
000037	深南电A	2021	3	4	B	71.2	CC	63.35	CCC	69.16	BBB	80.84	D44	电力、热力生产和供应业	广东省	440000	深圳市	440300
000037	深南电A	2021	4	4	B	70.41	CC	63.35	CCC	68.75	BB	78.98	D44	电力、热力生产和供应业	广东省	440000	深圳市	440300
000037	深南电A	2022	1	4	B	70.41	CC	63.35	CCC	68.75	BB	78.98	D44	电力、热力生产和供应业	广东省	440000	深圳市	440300
000037	深南电A	2022	2	4	B	71.55	CC	64.51	CCC	69.97	BBB	80.04	D44	电力、热力生产和供应业	广东省	440000	深圳市	440300
000037	深南电A	2022	3	4	B	71.06	CC	64.51	CCC	69.97	BB	78.77	D44	电力、热力生产和供应业	广东省	440000	深圳市	440300
000037	深南电A	2022	4	4	B	71.16	CC	64.51	CCC	69.56	BB	79.25	D44	电力、热力生产和供应业	广东省	440000	深圳市	440300
000037	深南电A	2023	1	4	B	70.76	CC	64.51	CCC	69.56	BB	78.19	D44	电力、热力生产和供应业	广东省	440000	深圳市	440300
000037	深南电A	2023	2	3	CCC	69.42	CC	63.93	CCC	69.97	BB	75.1	D44	电力、热力生产和供应业	广东省	440000	深圳市	440300
000037	深南电A	2023	3	3	CCC	69.82	CC	63.93	CCC	69.97	BB	76.16	D44	电力、热力生产和供应业	广东省	440000	深圳市	440300
000037	深南电A	2023	4	4	B	70.23	CC	63.93	CCC	69.97	BB	77.22	D44	电力、热力生产和供应业	广东省	440000	深圳市	440300
000037	深南电A	2024	1	3	CCC	69.94	CC	63.93	CCC	69.97	BB	76.47	D44	电力、热力生产和供应业	广东省	440000	深圳市	440300
000037	深南电A	2024	2	1	C	55.02	CC	64.01	CCC	66.85	BB	76.07	D44	电力、热力生产和供应业	广东省	440000	深圳市	440300
000037	深南电A	2024	3	1	C	59.28	CC	63.93	CCC	66.85	BBB	80.63	D44	电力、热力生产和供应业	广东省	440000	深圳市	440300
000037	深南电A	2024	4	1	C	58.1	CC	63.35	CCC	66.85	BB	79.51	D44	电力、热力生产和供应业	广东省	440000	深圳市	440300
000038	深大通	2021	2	4	B	70.94	CC	60.67	B	72.49	B	71	L72	商务服务业	广东省	440000	深圳市	440300
000038	深大通	2021	3	4	B	72.57	CC	60.67	B	72.49	B	74.18	L72	商务服务业	广东省	440000	深圳市	440300
000038	深大通	2021	4	4	B	72.54	CC	60.67	B	72.76	B	73.91	L72	商务服务业	广东省	440000	深圳市	440300
000038	大通退	2023	1	3	CCC	65.94	CC	60.67	B	72.53	CC	61.2	L72	商务服务业	广东省	440000	深圳市	440300
000038	大通退	2023	2	1	C	56.95	CC	60.67	CCC	65.05	C	49.79	L72	商务服务业	广东省	440000	深圳市	440300
000039	中集集团	2009	1	5	BB	78.35	CCC	68.88	BB	75.63	A	85.02	C33	金属制品业	广东省	440000	深圳市	440300
000039	中集集团	2009	2	5	BB	76.75	B	70.67	CCC	69.11	A	85.02	C33	金属制品业	广东省	440000	深圳市	440300
000039	中集集团	2009	3	5	BB	77.13	B	70.67	CCC	69.11	A	85.83	C33	金属制品业	广东省	440000	深圳市	440300
000039	中集集团	2009	4	5	BB	77.02	B	70.67	CCC	69.97	A	85.02	C33	金属制品业	广东省	440000	深圳市	440300
000039	中集集团	2010	1	5	BB	76.64	B	70.67	CCC	69.97	BBB	84.2	C33	金属制品业	广东省	440000	深圳市	440300
000039	中集集团	2010	2	5	BB	76.93	CCC	67.3	B	72.24	A	85.02	C33	金属制品业	广东省	440000	深圳市	440300
000039	中集集团	2010	3	5	BB	76.93	CCC	67.3	B	72.24	A	85.02	C33	金属制品业	广东省	440000	深圳市	440300
000039	中集集团	2010	4	5	BB	76.56	CCC	67.3	B	72.24	BBB	84.2	C33	金属制品业	广东省	440000	深圳市	440300
000039	中集集团	2011	1	5	BB	76.56	CCC	67.3	B	72.24	BBB	84.2	C33	金属制品业	广东省	440000	深圳市	440300
000039	中集集团	2011	2	5	BB	79.26	CCC	69.09	BBB	80.87	BBB	83.38	C33	金属制品业	广东省	440000	深圳市	440300
000039	中集集团	2011	3	5	BB	79.72	CCC	69.09	BBB	80.87	BBB	84.37	C33	金属制品业	广东省	440000	深圳市	440300
000039	中集集团	2011	4	5	BB	79	CCC	69.09	BBB	80	BBB	83.38	C33	金属制品业	广东省	440000	深圳市	440300
000039	中集集团	2012	1	5	BB	79	CCC	69.09	BBB	80	BBB	83.38	C33	金属制品业	广东省	440000	深圳市	440300
000039	中集集团	2012	2	5	BB	75.32	CC	64.48	B	73.68	BBB	81.97	C33	金属制品业	广东省	440000	深圳市	440300
000039	中集集团	2012	3	5	BB	75.32	CC	64.48	B	73.68	BBB	81.97	C33	金属制品业	广东省	440000	深圳市	440300
000039	中集集团	2012	4	5	BB	77.23	CC	64.48	B	73.68	A	86.14	C33	金属制品业	广东省	440000	深圳市	440300
000039	中集集团	2013	1	5	BB	77.23	CC	64.48	B	73.68	A	86.14	C33	金属制品业	广东省	440000	深圳市	440300
000039	中集集团	2013	2	5	BB	79.47	CCC	67.85	BB	78.39	A	86.14	C33	金属制品业	广东省	440000	深圳市	440300
000039	中集集团	2013	3	5	BB	78.87	CCC	67.85	B	74.95	A	87.13	C33	金属制品业	广东省	440000	深圳市	440300
000039	中集集团	2013	4	5	BB	78.41	CCC	67.85	B	74.95	A	86.14	C33	金属制品业	广东省	440000	深圳市	440300
000039	中集集团	2014	1	5	BB	77.95	CCC	67.85	B	74.95	A	85.14	C33	金属制品业	广东省	440000	深圳市	440300
000039	中集集团	2014	2	4	B	70.98	C	59.25	CCC	67.7	BB	79.18	C33	金属制品业	广东省	440000	深圳市	440300
000039	中集集团	2014	3	3	CCC	69.54	C	59.25	CC	64.26	BB	78.36	C33	金属制品业	广东省	440000	深圳市	440300
000039	中集集团	2014	4	3	CCC	69.92	C	59.25	CC	64.26	BB	79.18	C33	金属制品业	广东省	440000	深圳市	440300
000039	中集集团	2015	1	3	CCC	69.92	C	59.25	CC	64.26	BB	79.18	C33	金属制品业	广东省	440000	深圳市	440300
000039	中集集团	2015	2	6	BBB	80.07	B	70.67	BBB	84.09	BBB	82.15	C33	金属制品业	广东省	440000	深圳市	440300
000039	中集集团	2015	3	5	BB	78.63	B	70.67	BBB	80.65	BBB	81.33	C33	金属制品业	广东省	440000	深圳市	440300
000039	中集集团	2015	4	5	BB	79.54	B	70.67	BBB	80.65	BBB	83.32	C33	金属制品业	广东省	440000	深圳市	440300
000039	中集集团	2016	1	5	BB	80	B	70.67	BBB	80.65	BBB	84.32	C33	金属制品业	广东省	440000	深圳市	440300
000039	中集集团	2016	2	5	BB	78.88	B	70.67	BB	77.04	BBB	84.32	C33	金属制品业	广东省	440000	深圳市	440300
000039	中集集团	2016	3	5	BB	77.36	B	70.67	B	73.6	BBB	83.32	C33	金属制品业	广东省	440000	深圳市	440300
000039	中集集团	2016	4	5	BB	77.36	B	70.67	B	73.6	BBB	83.32	C33	金属制品业	广东省	440000	深圳市	440300
000039	中集集团	2017	1	5	BB	77.36	B	70.67	B	73.6	BBB	83.32	C33	金属制品业	广东省	440000	深圳市	440300
000039	中集集团	2017	2	5	BB	75.16	CCC	65.98	B	70.85	BBB	82.76	C33	金属制品业	广东省	440000	深圳市	440300
000039	中集集团	2017	3	4	B	73.73	CCC	65.98	CCC	67.4	BBB	81.94	C33	金属制品业	广东省	440000	深圳市	440300
000039	中集集团	2017	4	4	B	73.46	CCC	65.98	CCC	66.54	BBB	81.94	C33	金属制品业	广东省	440000	深圳市	440300
000039	中集集团	2018	1	4	B	73.46	CCC	65.98	CCC	66.54	BBB	81.94	C33	金属制品业	广东省	440000	深圳市	440300
000039	中集集团	2018	2	5	BB	78.5	B	70.27	BB	78.78	BBB	82.5	C33	金属制品业	广东省	440000	深圳市	440300
000039	中集集团	2018	3	5	BB	78.5	B	70.27	BB	78.78	BBB	82.5	C33	金属制品业	广东省	440000	深圳市	440300
000039	中集集团	2018	4	5	BB	78.87	B	70.27	BB	78.78	BBB	83.32	C33	金属制品业	广东省	440000	深圳市	440300
000039	中集集团	2019	1	5	BB	78.87	B	70.27	BB	78.78	BBB	83.32	C33	金属制品业	广东省	440000	深圳市	440300
000039	中集集团	2019	2	6	BBB	81.21	B	70.27	BBB	81.92	A	86.32	C33	金属制品业	广东省	440000	深圳市	440300
000039	中集集团	2019	3	5	BB	79.47	CCC	68.69	BBB	81.92	BBB	83.32	C33	金属制品业	广东省	440000	深圳市	440300
000039	中集集团	2019	4	6	BBB	81.28	B	70.27	A	85.36	BBB	84.14	C33	金属制品业	广东省	440000	深圳市	440300
000039	中集集团	2020	1	6	BBB	80.91	CCC	68.69	A	85.36	BBB	84.14	C33	金属制品业	广东省	440000	深圳市	440300
000039	中集集团	2020	2	5	BB	79.91	B	72.06	BB	79.56	BBB	84.14	C33	金属制品业	广东省	440000	深圳市	440300
000039	中集集团	2020	3	5	BB	79.91	B	72.06	BB	79.56	BBB	84.14	C33	金属制品业	广东省	440000	深圳市	440300
000039	中集集团	2020	4	6	BBB	80.06	B	72.06	BBB	83.01	BBB	82.15	C33	金属制品业	广东省	440000	深圳市	440300
000039	中集集团	2021	1	6	BBB	80.06	B	72.06	BBB	83.01	BBB	82.15	C33	金属制品业	广东省	440000	深圳市	440300
000039	中集集团	2021	2	5	BB	76.49	BB	77.72	B	71.09	BB	78.93	C33	金属制品业	广东省	440000	深圳市	440300
000039	中集集团	2021	3	5	BB	76.49	BB	77.72	B	71.09	BB	78.93	C33	金属制品业	广东省	440000	深圳市	440300
000039	中集集团	2021	4	5	BB	77.15	BB	77.72	B	71.09	BBB	80.52	C33	金属制品业	广东省	440000	深圳市	440300
000039	中集集团	2022	1	5	BB	77.51	BB	77.72	B	71.09	BBB	81.39	C33	金属制品业	广东省	440000	深圳市	440300
000039	中集集团	2022	2	7	A	85.17	BBB	80.27	AA	93.03	BBB	84.03	C33	金属制品业	广东省	440000	深圳市	440300
000039	中集集团	2022	3	6	BBB	84.64	BBB	80.27	AA	93.03	BBB	82.76	C33	金属制品业	广东省	440000	深圳市	440300
000039	中集集团	2022	4	6	BBB	84.35	BBB	80.16	AA	93.03	BBB	82.17	C33	金属制品业	广东省	440000	深圳市	440300
000039	中集集团	2023	1	6	BBB	84.22	BBB	80.16	AA	93.03	BBB	81.85	C33	金属制品业	广东省	440000	深圳市	440300
000039	中集集团	2023	2	6	BBB	83.7	BBB	80.49	A	88.32	BBB	83.29	C33	金属制品业	广东省	440000	深圳市	440300
000039	中集集团	2023	3	7	A	85.17	BBB	80.49	AA	91.43	BBB	84.88	C33	金属制品业	广东省	440000	深圳市	440300
000039	中集集团	2023	4	7	A	85.42	BBB	80.49	AA	91.43	A	85.47	C33	金属制品业	广东省	440000	深圳市	440300
000039	中集集团	2024	1	7	A	85.62	BBB	82.39	AA	91.43	BBB	84.48	C33	金属制品业	广东省	440000	深圳市	440300
000039	中集集团	2024	2	8	AA	92.21	BBB	81.35	AA	90.05	A	86.68	C33	金属制品业	广东省	440000	深圳市	440300
000039	中集集团	2024	3	8	AA	94.38	BBB	83.68	AA	92.53	A	86.05	C33	金属制品业	广东省	440000	深圳市	440300
000039	中集集团	2024	4	9	AAA	95.18	BBB	84.13	AA	92.53	A	86.51	C33	金属制品业	广东省	440000	深圳市	440300
000040	深鸿基	2009	1	4	B	72.22	CC	62.35	CCC	67.79	BB	79.56	S90	综合	广东省	440000	深圳市	440300
000040	深鸿基	2009	2	3	CCC	69.31	C	55.76	BB	76.57	B	71.48	S90	综合	广东省	440000	深圳市	440300
000040	深鸿基	2009	3	3	CCC	69.67	C	55.76	BB	76.57	B	72.23	S90	综合	广东省	440000	深圳市	440300
000040	深鸿基	2009	4	3	CCC	69.31	C	55.76	BB	76.57	B	71.48	S90	综合	广东省	440000	深圳市	440300
000040	深鸿基	2010	1	3	CCC	68.58	C	55.76	BB	76.57	CCC	69.96	K70	房地产业	广东省	440000	深圳市	440300
000040	深鸿基	2010	2	4	B	71.19	C	55.76	B	71.35	BB	78.46	K70	房地产业	广东省	440000	深圳市	440300
000040	深鸿基	2010	3	4	B	70.82	C	55.76	B	71.35	BB	77.7	K70	房地产业	广东省	440000	深圳市	440300
000040	深鸿基	2010	4	4	B	71.92	C	55.76	B	71.35	BB	79.97	K70	房地产业	广东省	440000	深圳市	440300
000040	宝安地产	2011	1	4	B	71.92	C	55.76	B	71.35	BB	79.97	K70	房地产业	广东省	440000	深圳市	440300
000040	宝安地产	2011	2	3	CCC	68.99	C	55.76	CC	63.86	BB	78.35	K70	房地产业	广东省	440000	深圳市	440300
000040	宝安地产	2011	3	3	CCC	68.69	C	55.76	CC	63.86	BB	77.73	K70	房地产业	广东省	440000	深圳市	440300
000040	宝安地产	2011	4	3	CCC	67.83	C	55.76	CC	63.86	BB	75.94	K70	房地产业	广东省	440000	深圳市	440300
000040	宝安地产	2012	1	3	CCC	69.29	C	55.76	CC	63.86	BB	78.97	K70	房地产业	广东省	440000	深圳市	440300
000040	宝安地产	2012	2	3	CCC	66.31	C	50.54	C	53.37	BBB	81.51	K70	房地产业	广东省	440000	深圳市	440300
[truncated: 201,973+ more rows]
