# Supplementary material
Source: Research Square preprint supplement (doi:10.21203/rs.3.rs-9809611/v1)
Supplement: Supplementary file 6 [file 98e0592539103c4c28b905d9.docx]

Environment setup

clear all

set more off

set matsize 11000

set maxvar 32767

version 15.0

capture log close _all

global root "D:\ESG_Audit_Quality_Replication"

global raw "$root\raw_data"

global temp "$root\temp_data"

global clean "$root\clean_data"

global output "$root\outputs"

global tables "$root\outputs\tables"

global logs "$root\outputs\logs"

capture mkdir "$root"

capture mkdir "$raw"

capture mkdir "$temp"

capture mkdir "$clean"

capture mkdir "$output"

capture mkdir "$tables"

capture mkdir "$logs"

log using "$logs\replication_log.smcl", replace

set seed 20260628

1. Install required user-written commands

capture which winsor2

if _rc {

ssc install winsor2, replace

}

capture which esttab

if _rc {

ssc install estout, replace

}

capture which outreg2

if _rc {

ssc install outreg2, replace

}

capture which psmatch2

if _rc {

ssc install psmatch2, replace

}

capture which pstest

if _rc {

ssc install psmatch2, replace

}

capture which reghdfe

if _rc {

ssc install reghdfe, replace

}

capture which ftools

if _rc {

ssc install ftools, replace

}

2. Define raw file paths

global file_esg_manual "$raw\raw_esg_assurance_manual.xlsx"

global file_financials "$raw\raw_financials_csmar.xlsx"

global file_governance "$raw\raw_governance_csmar.xlsx"

global file_audit "$raw\raw_audit_csmar.xlsx"

global file_restatement "$raw\raw_restatement_csmar.xlsx"

global file_dibo "$raw\raw_dibo_internal_control.xlsx"

global file_analyst "$raw\raw_analyst_attention_csmar.xlsx"

global file_market "$raw\raw_market_value_csmar.xlsx"

global file_industry_equity "$raw\raw_industry_equity_csmar.xlsx"

global file_em_inputs "$raw\raw_earnings_management_inputs.xlsx"

3. Import manually collected ESG assurance data

capture confirm file "$file_esg_manual"

if _rc {

display as error "The ESG manual data file is missing. Please check the file path."

exit 601

}

import excel using "$file_esg_manual", firstrow clear

rename *, lower

capture confirm variable stkcd

if _rc {

display as error "Variable stkcd is required in the ESG manual data."

exit 111

}

capture confirm variable year

if _rc {

display as error "Variable year is required in the ESG manual data."

exit 111

}

tostring stkcd, replace force

replace stkcd = strtrim(stkcd)

replace stkcd = substr("000000" + stkcd, -6, 6)

destring year, replace force

capture confirm variable company_name

if _rc {

gen company_name = ""

}

capture confirm variable esg_assurance

if _rc {

gen esg_assurance = 1

}

capture confirm variable esg_assurance_provider

if _rc {

gen esg_assurance_provider = ""

}

capture confirm variable esg_provider_type

if _rc {

gen esg_provider_type = ""

}

capture confirm variable esg_provider_location

if _rc {

gen esg_provider_location = ""

}

capture confirm variable audit_firm

if _rc {

gen audit_firm = ""

}

capture confirm variable audit_firm_location

if _rc {

gen audit_firm_location = ""

}

capture confirm variable same

if _rc {

gen same = .

}

capture confirm variable same_big4

if _rc {

gen same_big4 = .

}

gen esg_provider_name_clean = lower(strtrim(itrim(esg_assurance_provider)))

gen esg_provider_location_clean = lower(strtrim(itrim(esg_provider_location)))

gen audit_firm_name_clean = lower(strtrim(itrim(audit_firm)))

gen audit_firm_location_clean = lower(strtrim(itrim(audit_firm_location)))

gen esg_provider_type_clean = lower(strtrim(itrim(esg_provider_type)))

gen esg_provider_is_accounting_firm = 0

replace esg_provider_is_accounting_firm = 1 if strpos(esg_provider_type_clean, "accounting") > 0

replace esg_provider_is_accounting_firm = 1 if strpos(esg_provider_type_clean, "cpa") > 0

replace esg_provider_is_accounting_firm = 1 if strpos(esg_provider_name_clean, "kpmg") > 0

replace esg_provider_is_accounting_firm = 1 if strpos(esg_provider_name_clean, "deloitte") > 0

replace esg_provider_is_accounting_firm = 1 if strpos(esg_provider_name_clean, "ernst") > 0

replace esg_provider_is_accounting_firm = 1 if strpos(esg_provider_name_clean, "ey") > 0

replace esg_provider_is_accounting_firm = 1 if strpos(esg_provider_name_clean, "pricewaterhouse") > 0

replace esg_provider_is_accounting_firm = 1 if strpos(esg_provider_name_clean, "pwc") > 0

replace esg_provider_is_accounting_firm = 1 if strpos(esg_provider_name_clean, "bdo") > 0

replace esg_provider_is_accounting_firm = 1 if strpos(esg_provider_name_clean, "grant thornton") > 0

gen same_auto = .

replace same_auto = 1 if esg_provider_is_accounting_firm == 1 ///

& esg_provider_name_clean != "" ///

& audit_firm_name_clean != "" ///

& esg_provider_name_clean == audit_firm_name_clean ///

& esg_provider_location_clean == audit_firm_location_clean

replace same_auto = 0 if esg_assurance == 1 & missing(same_auto)

gen Same = same

replace Same = same_auto if missing(Same)

replace Same = 0 if esg_assurance == 1 & missing(Same)

gen audit_firm_big4_auto = 0

replace audit_firm_big4_auto = 1 if strpos(audit_firm_name_clean, "kpmg") > 0

replace audit_firm_big4_auto = 1 if strpos(audit_firm_name_clean, "deloitte") > 0

replace audit_firm_big4_auto = 1 if strpos(audit_firm_name_clean, "ernst") > 0

replace audit_firm_big4_auto = 1 if strpos(audit_firm_name_clean, "ey") > 0

replace audit_firm_big4_auto = 1 if strpos(audit_firm_name_clean, "pricewaterhouse") > 0

replace audit_firm_big4_auto = 1 if strpos(audit_firm_name_clean, "pwc") > 0

gen Same_Big4 = same_big4

replace Same_Big4 = Same * audit_firm_big4_auto if missing(Same_Big4)

label variable esg_assurance "ESG report assurance indicator"

label variable esg_provider_is_accounting_firm "ESG assurance provider is an accounting firm"

label variable Same "Same accounting firm for ESG assurance and annual audit"

label variable Same_Big4 "Same Big 4 accounting firm for ESG assurance and annual audit"

duplicates drop stkcd year, force

save "$temp\esg_assurance_manual.dta", replace

4. Import financial data from CSMAR extracts

capture confirm file "$file_financials"

if _rc {

display as error "The financial data file is missing. Please check the file path."

exit 601

}

import excel using "$file_financials", firstrow clear

rename *, lower

tostring stkcd, replace force

replace stkcd = strtrim(stkcd)

replace stkcd = substr("000000" + stkcd, -6, 6)

destring year, replace force

foreach v in total_assets total_liabilities net_profit operating_revenue ///

accounts_receivable inventory current_assets current_liabilities ///

cash short_term_debt tax_payable depreciation_expense ppe ///

book_equity total_equity market_cap audit_fee {

capture confirm variable `v'

if _rc {

gen `v' = .

}

destring `v', replace force

}

gen Size = ln(total_assets)

gen Lev = total_liabilities / total_assets

gen Roa = net_profit / total_assets

gen Loss = .

replace Loss = 1 if net_profit < 0 & !missing(net_profit)

replace Loss = 0 if net_profit >= 0 & !missing(net_profit)

gen Rece = accounts_receivable / total_assets

gen Inv = inventory / total_assets

gen BM = book_equity / market_cap

replace BM = total_equity / market_cap if missing(BM) & !missing(total_equity) & !missing(market_cap)

gen Fee = ln(audit_fee)

gen TbinQ = market_cap / total_assets

label variable Size "Firm size, natural logarithm of total assets"

label variable Lev "Leverage, total liabilities divided by total assets"

label variable Roa "Return on assets, net profit divided by total assets"

label variable Loss "Loss indicator"

label variable Rece "Accounts receivable divided by total assets"

label variable Inv "Inventory divided by total assets"

label variable BM "Book-to-market ratio"

label variable Fee "Audit fees, natural logarithm"

label variable TbinQ "Firm value, market capitalization divided by total assets"

duplicates drop stkcd year, force

save "$temp\financials.dta", replace

5. Import governance data from CSMAR extracts

capture confirm file "$file_governance"

if _rc {

display as error "The governance data file is missing. Please check the file path."

exit 601

}

import excel using "$file_governance", firstrow clear

rename *, lower

tostring stkcd, replace force

replace stkcd = strtrim(stkcd)

replace stkcd = substr("000000" + stkcd, -6, 6)

destring year, replace force

foreach v in independent_directors board_members listing_year soe ah first_shareholder_ratio {

capture confirm variable `v'

if _rc {

gen `v' = .

}

destring `v', replace force

}

gen Ddratio = independent_directors / board_members

gen Dshsize = board_members

gen Age = ln(year - listing_year + 1)

gen Soe = soe

gen AH = ah

gen First = first_shareholder_ratio

replace Soe = 0 if Soe != 1 & !missing(Soe)

replace AH = 0 if AH != 1 & !missing(AH)

label variable Ddratio "Ratio of independent directors"

label variable Dshsize "Board size"

label variable Age "Firm age, natural logarithm of listing years"

label variable Soe "State-owned enterprise indicator"

label variable AH "A plus H share listing indicator"

label variable First "Shareholding ratio of the largest shareholder"

duplicates drop stkcd year, force

save "$temp\governance.dta", replace

6. Import audit-related data from CSMAR extracts

capture confirm file "$file_audit"

if _rc {

display as error "The audit data file is missing. Please check the file path."

exit 601

}

import excel using "$file_audit", firstrow clear

rename *, lower

tostring stkcd, replace force

replace stkcd = strtrim(stkcd)

replace stkcd = substr("000000" + stkcd, -6, 6)

destring year, replace force

capture confirm variable audit_firm

if _rc {

gen audit_firm = ""

}

capture confirm variable audit_report_date

if _rc {

gen audit_report_date = ""

}

capture confirm variable financial_statement_date

if _rc {

gen financial_statement_date = ""

}

capture confirm variable audit_opinion

if _rc {

gen audit_opinion = .

}

capture confirm variable audit_tenure

if _rc {

gen audit_tenure = .

}

gen audit_firm_clean = lower(strtrim(itrim(audit_firm)))

gen Big4 = 0

replace Big4 = 1 if strpos(audit_firm_clean, "kpmg") > 0

replace Big4 = 1 if strpos(audit_firm_clean, "deloitte") > 0

replace Big4 = 1 if strpos(audit_firm_clean, "ernst") > 0

replace Big4 = 1 if strpos(audit_firm_clean, "ey") > 0

replace Big4 = 1 if strpos(audit_firm_clean, "pricewaterhouse") > 0

replace Big4 = 1 if strpos(audit_firm_clean, "pwc") > 0

gen audit_report_date_num = .

capture confirm numeric variable audit_report_date

if !_rc {

replace audit_report_date_num = audit_report_date

}

capture confirm string variable audit_report_date

if !_rc {

replace audit_report_date_num = date(audit_report_date, "YMD")

replace audit_report_date_num = date(audit_report_date, "MDY") if missing(audit_report_date_num)

replace audit_report_date_num = date(audit_report_date, "DMY") if missing(audit_report_date_num)

}

gen financial_statement_date_num = .

capture confirm numeric variable financial_statement_date

if !_rc {

replace financial_statement_date_num = financial_statement_date

}

capture confirm string variable financial_statement_date

if !_rc {

replace financial_statement_date_num = date(financial_statement_date, "YMD")

replace financial_statement_date_num = date(financial_statement_date, "MDY") if missing(financial_statement_date_num)

replace financial_statement_date_num = date(financial_statement_date, "DMY") if missing(financial_statement_date_num)

}

replace financial_statement_date_num = mdy(12, 31, year) if missing(financial_statement_date_num)

format audit_report_date_num %td

format financial_statement_date_num %td

gen Delay = audit_report_date_num - financial_statement_date_num

gen Lag = Delay

gen Opinion = audit_opinion

replace Opinion = 0 if Opinion != 1 & !missing(Opinion)

gen Tenure = audit_tenure

egen audit_firm_id = group(audit_firm_clean), label

label variable Big4 "Big 4 auditor indicator"

label variable Tenure "Audit tenure"

label variable Delay "Audit delay"

label variable Lag "Audit delay"

label variable Opinion "Modified audit opinion indicator"

label variable audit_firm_id "Audit firm identifier"

duplicates drop stkcd year, force

save "$temp\audit.dta", replace

7. Import financial restatement data from CSMAR extracts

capture confirm file "$file_restatement"

if _rc {

display as error "The restatement data file is missing. Please check the file path."

exit 601

}

import excel using "$file_restatement", firstrow clear

rename *, lower

tostring stkcd, replace force

replace stkcd = strtrim(stkcd)

replace stkcd = substr("000000" + stkcd, -6, 6)

destring year, replace force

capture confirm variable restatement_flag

if _rc {

gen restatement_flag = .

}

destring restatement_flag, replace force

gen Restate = restatement_flag

replace Restate = 0 if Restate != 1 & !missing(Restate)

label variable Restate "Financial restatement indicator"

duplicates drop stkcd year, force

save "$temp\restatement.dta", replace

8. Import Dibo Internal Control Index data

capture confirm file "$file_dibo"

if _rc {

display as result "The Dibo data file is missing. Ic will be set to missing."

clear

set obs 0

gen str6 stkcd = ""

gen year = .

gen Ic = .

save "$temp\dibo_ic.dta", replace

}

if !_rc {

import excel using "$file_dibo", firstrow clear

rename *, lower

tostring stkcd, replace force

replace stkcd = strtrim(stkcd)

replace stkcd = substr("000000" + stkcd, -6, 6)

destring year, replace force

capture confirm variable ic

if _rc {

capture confirm variable dibo_internal_control_index

if !_rc {

rename dibo_internal_control_index ic

}

else {

gen ic = .

}

}

destring ic, replace force

gen Ic = ic

label variable Ic "Dibo Internal Control Index"

duplicates drop stkcd year, force

save "$temp\dibo_ic.dta", replace

}

9. Import analyst attention data

capture confirm file "$file_analyst"

if _rc {

display as result "The analyst data file is missing. Analyst and Research will be set to missing."

clear

set obs 0

gen str6 stkcd = ""

gen year = .

gen Analyst = .

gen Research = .

gen LnAnalyst = .

gen LnResearch = .

save "$temp\analyst_attention.dta", replace

}

if !_rc {

import excel using "$file_analyst", firstrow clear

rename *, lower

tostring stkcd, replace force

replace stkcd = strtrim(stkcd)

replace stkcd = substr("000000" + stkcd, -6, 6)

destring year, replace force

capture confirm variable analyst_team_count

if _rc {

gen analyst_team_count = .

}

capture confirm variable research_report_count

if _rc {

gen research_report_count = .

}

destring analyst_team_count research_report_count, replace force

gen Analyst = analyst_team_count

gen Research = research_report_count

gen LnAnalyst = ln(1 + Analyst)

gen LnResearch = ln(1 + Research)

label variable Analyst "Number of analyst teams following the firm"

label variable Research "Number of analyst reports"

label variable LnAnalyst "Natural logarithm of one plus analyst attention"

label variable LnResearch "Natural logarithm of one plus research report attention"

duplicates drop stkcd year, force

save "$temp\analyst_attention.dta", replace

}

10. Construct industry concentration HHI

capture confirm file "$file_industry_equity"

if _rc {

display as result "The industry equity data file is missing. HHI will be set to missing."

clear

set obs 0

gen str6 stkcd = ""

gen year = .

gen HHI = .

save "$temp\hhi.dta", replace

}

if !_rc {

import excel using "$file_industry_equity", firstrow clear

rename *, lower

tostring stkcd, replace force

replace stkcd = strtrim(stkcd)

replace stkcd = substr("000000" + stkcd, -6, 6)

destring year, replace force

capture confirm variable industry_code

if _rc {

gen industry_code = ""

}

capture confirm variable book_equity

if _rc {

capture confirm variable total_equity

if !_rc {

gen book_equity = total_equity

}

else {

gen book_equity = .

}

}

destring book_equity, replace force

egen industry_id_hhi = group(industry_code)

bysort industry_id_hhi year: egen industry_total_equity = total(book_equity)

gen equity_share = book_equity / industry_total_equity

gen equity_share_sq = equity_share^2

bysort industry_id_hhi year: egen HHI = total(equity_share_sq)

label variable HHI "Herfindahl index based on book equity"

keep stkcd year HHI

duplicates drop stkcd year, force

save "$temp\hhi.dta", replace

}

11. Import market data if separated

capture confirm file "$file_market"

if _rc {

display as result "The market data file is missing. Existing market variables will be used."

clear

set obs 0

gen str6 stkcd = ""

gen year = .

gen market_cap_extra = .

save "$temp\market.dta", replace

}

if !_rc {

import excel using "$file_market", firstrow clear

rename *, lower

tostring stkcd, replace force

replace stkcd = strtrim(stkcd)

replace stkcd = substr("000000" + stkcd, -6, 6)

destring year, replace force

capture confirm variable market_cap

if _rc {

gen market_cap = .

}

destring market_cap, replace force

rename market_cap market_cap_extra

duplicates drop stkcd year, force

save "$temp\market.dta", replace

}

12. Merge all datasets

use "$temp\esg_assurance_manual.dta", clear

merge 1:1 stkcd year using "$temp\financials.dta", keep(master match) nogen

merge 1:1 stkcd year using "$temp\governance.dta", keep(master match) nogen

merge 1:1 stkcd year using "$temp\audit.dta", keep(master match) nogen

merge 1:1 stkcd year using "$temp\restatement.dta", keep(master match) nogen

merge 1:1 stkcd year using "$temp\dibo_ic.dta", keep(master match) nogen

merge 1:1 stkcd year using "$temp\analyst_attention.dta", keep(master match) nogen

merge 1:1 stkcd year using "$temp\hhi.dta", keep(master match) nogen

merge 1:1 stkcd year using "$temp\market.dta", keep(master match) nogen

capture confirm variable market_cap_extra

if !_rc {

replace market_cap = market_cap_extra if missing(market_cap) & !missing(market_cap_extra)

drop market_cap_extra

}

egen firm_id = group(stkcd), label

capture confirm variable industry_code

if _rc {

gen industry_code = ""

}

egen industry_id = group(industry_code), label

label variable firm_id "Firm identifier"

label variable industry_id "Industry identifier"

save "$temp\merged_raw_panel.dta", replace

13. Sample selection

use "$temp\merged_raw_panel.dta", clear

gen sample_initial = 1

gen in_sample_period = inrange(year, 2009, 2021)

gen has_esg_assurance = esg_assurance == 1

capture confirm variable st

if _rc {

gen st = 0

}

destring st, replace force

gen non_st = st != 1

global core_vars Restate Same Size Lev Roa Loss Ddratio Dshsize Age Big4 Soe AH BM Tenure

egen missing_core_count = rowmiss($core_vars)

gen complete_core = missing_core_count == 0

gen final_sample = 0

replace final_sample = 1 if in_sample_period == 1 ///

& has_esg_assurance == 1 ///

& non_st == 1 ///

& complete_core == 1

preserve

tempfile sample_steps

postfile handle str80 step_name double observations double firms using "`sample_steps'", replace

quietly count

quietly levelsof firm_id, local(allfirms)

local nf_all : word count `allfirms'

post handle ("Initial merged firm-year observations") (r(N)) (`nf_all')

quietly count if in_sample_period == 1

quietly levelsof firm_id if in_sample_period == 1, local(firms_period)

local nf_period : word count `firms_period'

post handle ("Observations from 2009 to 2021") (r(N)) (`nf_period')

quietly count if in_sample_period == 1 & has_esg_assurance == 1

quietly levelsof firm_id if in_sample_period == 1 & has_esg_assurance == 1, local(firms_esg)

local nf_esg : word count `firms_esg'

post handle ("Observations with ESG assurance") (r(N)) (`nf_esg')

quietly count if in_sample_period == 1 & has_esg_assurance == 1 & non_st == 1

quietly levelsof firm_id if in_sample_period == 1 & has_esg_assurance == 1 & non_st == 1, local(firms_nonst)

local nf_nonst : word count `firms_nonst'

post handle ("Observations after excluding ST firms") (r(N)) (`nf_nonst')

quietly count if final_sample == 1

quietly levelsof firm_id if final_sample == 1, local(firms_final)

local nf_final : word count `firms_final'

post handle ("Final regression sample") (r(N)) (`nf_final')

postclose handle

use "`sample_steps'", clear

export excel using "$tables\sample_selection_process.xlsx", firstrow(variables) replace

restore

keep if final_sample == 1

duplicates report stkcd year

duplicates drop stkcd year, force

assert inrange(year, 2009, 2021)

assert Restate == 0 | Restate == 1

assert Same == 0 | Same == 1

save "$clean\clean_panel_before_winsor.dta", replace

export delimited using "$clean\clean_panel_before_winsor.csv", replace

export excel using "$clean\clean_panel_before_winsor.xlsx", firstrow(variables) replace

14. Winsorization

use "$clean\clean_panel_before_winsor.dta", clear

global winsor_vars Size Lev Roa Ddratio Dshsize Age BM Tenure Delay Lag Rece Inv First Fee TbinQ Ic HHI Analyst Research LnAnalyst LnResearch

foreach v of global winsor_vars {

capture confirm variable `v'

if !_rc {

quietly count if !missing(`v')

if r(N) > 0 {

winsor2 `v', cuts(1 99) replace

}

}

}

save "$clean\clean_panel_after_winsor.dta", replace

export delimited using "$clean\clean_panel_after_winsor.csv", replace

export excel using "$clean\clean_panel_after_winsor.xlsx", firstrow(variables) replace

15. Construct alternative audit quality variables

use "$clean\clean_panel_after_winsor.dta", clear

xtset firm_id year

capture confirm variable current_assets

if !_rc {

gen lag_total_assets = L.total_assets

gen delta_current_assets = current_assets - L.current_assets

gen delta_cash = cash - L.cash

gen delta_current_liabilities = current_liabilities - L.current_liabilities

gen delta_short_term_debt = short_term_debt - L.short_term_debt

gen delta_revenue = operating_revenue - L.operating_revenue

gen delta_receivables = accounts_receivable - L.accounts_receivable

gen total_accruals = delta_current_assets - delta_cash - delta_current_liabilities ///

+ delta_short_term_debt - depreciation_expense

gen ta_scaled = total_accruals / lag_total_assets

gen inv_lag_assets = 1 / lag_total_assets

gen d_rev_minus_d_rec_scaled = (delta_revenue - delta_receivables) / lag_total_assets

gen ppe_scaled = ppe / lag_total_assets

gen da_mj = .

gen absda_mj = .

levelsof industry_id, local(indlist)

levelsof year, local(yearlist)

foreach ind of local indlist {

foreach yy of local yearlist {

quietly count if industry_id == `ind' & year == `yy' ///

& !missing(ta_scaled, inv_lag_assets, d_rev_minus_d_rec_scaled, ppe_scaled)

if r(N) >= 8 {

quietly regress ta_scaled inv_lag_assets d_rev_minus_d_rec_scaled ppe_scaled ///

if industry_id == `ind' & year == `yy'

predict temp_resid if e(sample), resid

replace da_mj = temp_resid if e(sample)

drop temp_resid

}

}

}

replace absda_mj = abs(da_mj)

}

capture confirm variable absda_mj

if !_rc {

gen Absda_MJ = absda_mj

}

else {

gen Absda_MJ = .

}

capture confirm variable total_accruals

if !_rc {

gen roa_lag = L.Roa

gen absda_nonlinear = .

levelsof industry_id, local(indlist2)

levelsof year, local(yearlist2)

foreach ind of local indlist2 {

foreach yy of local yearlist2 {

quietly count if industry_id == `ind' & year == `yy' ///

& !missing(ta_scaled, inv_lag_assets, d_rev_minus_d_rec_scaled, ppe_scaled, roa_lag)

if r(N) >= 8 {

quietly regress ta_scaled inv_lag_assets d_rev_minus_d_rec_scaled ppe_scaled roa_lag ///

if industry_id == `ind' & year == `yy'

predict temp_resid2 if e(sample), resid

replace absda_nonlinear = abs(temp_resid2) if e(sample)

drop temp_resid2

}

}

}

gen Absda_NL = absda_nonlinear

}

else {

gen Absda_NL = .

}

capture confirm variable ear

if _rc {

gen EAR = .

}

else {

gen EAR = ear

}

capture confirm variable absda

if !_rc {

replace Absda_NL = absda if missing(Absda_NL)

}

capture confirm variable modified_jones_absda

if !_rc {

replace Absda_MJ = modified_jones_absda if missing(Absda_MJ)

}

label variable EAR "Earnings aggressiveness"

label variable Absda_NL "Absolute discretionary accruals from nonlinear model"

label variable Absda_MJ "Absolute discretionary accruals from modified Jones model"

save "$clean\final_regression_sample.dta", replace

export excel using "$clean\final_regression_sample.xlsx", firstrow(variables) replace

16. Define model variable lists

use "$clean\final_regression_sample.dta", clear

global controls_quality Size Lev Roa Loss Ddratio Dshsize Age Big4 Soe AH BM Tenure

global controls_delay Size Lev Roa Age Big4 Soe Tenure Loss Rece Inv Opinion First

global controls_fee Size Lev Roa Loss Ddratio Dshsize Age Big4 Soe AH BM Tenure

global controls_value Size Lev Roa Loss Ddratio Dshsize Age Big4 Soe AH BM Tenure Fee

global fe_year i.year

global fe_industry i.industry_id

eststo clear

17. Data checks and variable dictionary

misstable summarize Restate Same Delay Fee TbinQ $controls_quality

summarize Restate Same Delay Fee TbinQ $controls_quality

codebook Restate Same Delay Fee TbinQ $controls_quality, compact

preserve

tempfile vardict

postfile handle str32 variable_name str120 variable_label using "`vardict'", replace

ds

foreach v of varlist `r(varlist)' {

local lab : variable label `v'

post handle ("`v'") ("`lab'")

}

postclose handle

use "`vardict'", clear

export excel using "$tables\variable_dictionary_from_stata.xlsx", firstrow(variables) replace

restore

18. Table 2 Panel A annual distribution

use "$clean\final_regression_sample.dta", clear

preserve

gen n_esg = 1

gen n_accounting_provider = esg_provider_is_accounting_firm == 1

gen n_non_accounting_provider = esg_provider_is_accounting_firm == 0

gen n_same = Same == 1

gen n_not_same = Same == 0

gen n_same_big4 = Same_Big4 == 1

collapse (sum) n_esg n_accounting_provider n_non_accounting_provider ///

n_same n_not_same n_same_big4, by(year)

gen accounting_provider_ratio = n_accounting_provider / n_esg

gen same_ratio = n_same / n_esg

gen same_big4_ratio = n_same_big4 / n_esg

export excel using "$tables\Table2_PanelA_Annual_Distribution.xlsx", firstrow(variables) replace

restore

19. Table 2 Panel B industry distribution

use "$clean\final_regression_sample.dta", clear

preserve

gen n_esg = 1

gen n_accounting_provider = esg_provider_is_accounting_firm == 1

gen n_non_accounting_provider = esg_provider_is_accounting_firm == 0

gen n_same = Same == 1

gen n_not_same = Same == 0

collapse (sum) n_esg n_accounting_provider n_non_accounting_provider ///

n_same n_not_same, by(industry_id)

gen accounting_provider_ratio = n_accounting_provider / n_esg

gen same_ratio = n_same / n_esg

export excel using "$tables\Table2_PanelB_Industry_Distribution.xlsx", firstrow(variables) replace

restore

20. Table 2 Panel C enterprise nature distribution

use "$clean\final_regression_sample.dta", clear

preserve

gen base_id = _n

expand 6

bysort base_id: gen group_index = _n

gen group_name = ""

replace group_name = "SOE" if group_index == 1 & Soe == 1

replace group_name = "Non-SOE" if group_index == 2 & Soe == 0

replace group_name = "A share" if group_index == 3 & AH == 0

replace group_name = "A plus H share" if group_index == 4 & AH == 1

replace group_name = "Big 4" if group_index == 5 & Big4 == 1

replace group_name = "Non-Big 4" if group_index == 6 & Big4 == 0

keep if group_name != ""

gen n_esg = 1

gen n_accounting_provider = esg_provider_is_accounting_firm == 1

gen n_non_accounting_provider = esg_provider_is_accounting_firm == 0

gen n_same = Same == 1

gen n_not_same = Same == 0

gen n_same_big4 = Same_Big4 == 1

collapse (sum) n_esg n_accounting_provider n_non_accounting_provider ///

n_same n_not_same n_same_big4, by(group_name)

gen accounting_provider_ratio = n_accounting_provider / n_esg

gen same_ratio = n_same / n_esg

gen same_big4_ratio = n_same_big4 / n_esg

export excel using "$tables\Table2_PanelC_Enterprise_Nature_Distribution.xlsx", firstrow(variables) replace

restore

21. Table 2 Panel D descriptive statistics

use "$clean\final_regression_sample.dta", clear

estpost summarize Restate Fee Same Size Lev Roa Loss Dshsize Ddratio Age Big4 Soe Opinion AH BM Tenure, detail

esttab using "$tables\Table2_PanelD_Descriptive_Statistics.rtf", ///

cells("count mean sd min p50 max") ///

noobs nonumber replace ///

title("Table 2 Panel D. Descriptive Statistics")

22. Table 3 main regression

use "$clean\final_regression_sample.dta", clear

eststo clear

logit Restate Same $controls_quality, vce(robust)

eststo T3_M1_Logit

margins, dydx(Same Size Lev Roa Loss Ddratio Dshsize Age Big4 Soe AH BM Tenure) post

eststo T3_M1_AME

logit Restate Same $controls_quality $fe_year $fe_industry, vce(robust)

eststo T3_M2_Logit

margins, dydx(Same Size Lev Roa Loss Ddratio Dshsize Age Big4 Soe AH BM Tenure) post

eststo T3_M2_AME

esttab T3_M1_AME T3_M2_AME using "$tables\Table3_Main_Hypothesis_AME.rtf", ///

b(3) t(2) star(* 0.10 ** 0.05 *** 0.01) ///

stats(N, fmt(0) labels("Observations")) ///

title("Table 3. Main Hypothesis: Average Marginal Effects") ///

replace

esttab T3_M1_Logit T3_M2_Logit using "$tables\Table3_Main_Hypothesis_Logit.rtf", ///

b(3) z(2) star(* 0.10 ** 0.05 *** 0.01) ///

pr2 stats(N r2_p, fmt(0 3) labels("Observations" "Pseudo R2")) ///

title("Table 3. Main Hypothesis: Logit Coefficients") ///

replace

23. Table 4 fixed effects and clustered standard errors

use "$clean\final_regression_sample.dta", clear

eststo clear

reghdfe Restate Same $controls_quality, absorb(firm_id year) vce(robust)

eststo T4_M1_FirmFE_LPM

reghdfe Restate Same $controls_quality, absorb(audit_firm_id year industry_id) vce(robust)

eststo T4_M2_AuditFE_LPM

logit Restate Same $controls_quality $fe_year $fe_industry, vce(cluster firm_id)

eststo T4_M3_ClusterFirm_Logit

reghdfe Restate Same $controls_quality, absorb(year industry_id) vce(cluster firm_id year)

eststo T4_M4_TwoWayCluster_LPM

esttab T4_M1_FirmFE_LPM T4_M2_AuditFE_LPM T4_M3_ClusterFirm_Logit T4_M4_TwoWayCluster_LPM ///

using "$tables\Table4_Robustness_FE_Cluster.rtf", ///

b(3) t(2) z(2) star(* 0.10 ** 0.05 *** 0.01) ///

stats(N r2 r2_p, fmt(0 3 3) labels("Observations" "R2" "Pseudo R2")) ///

title("Table 4. Robustness Test: Fixed Effects and Clustered Standard Errors") ///

replace

24. Table 5 alternative audit quality measures

use "$clean\final_regression_sample.dta", clear

eststo clear

capture noisily regress EAR Same $controls_quality $fe_year $fe_industry, vce(robust)

if !_rc {

eststo T5_M1_EAR

}

capture noisily regress Absda_NL Same $controls_quality $fe_year $fe_industry, vce(robust)

if !_rc {

eststo T5_M2_AbsdaNL

}

capture noisily regress Absda_MJ Same $controls_quality $fe_year $fe_industry, vce(robust)

if !_rc {

eststo T5_M3_AbsdaMJ

}

esttab T5_M1_EAR T5_M2_AbsdaNL T5_M3_AbsdaMJ using "$tables\Table5_Robustness_Alternative_Audit_Quality.rtf", ///

b(3) t(2) star(* 0.10 ** 0.05 *** 0.01) ///

stats(N r2_a, fmt(0 3) labels("Observations" "Adjusted R2")) ///

title("Table 5. Robustness Test: Alternative Measures of Audit Quality") ///

replace

25. Table 6 propensity score matching

use "$clean\final_regression_sample.dta", clear

eststo clear

logit Same Size Lev Roa Loss Ddratio Dshsize Age Big4 Soe AH BM Tenure i.year i.industry_id, vce(robust)

predict pscore_same, pr

summarize pscore_same if Same == 1

local pmin_treated = r(min)

local pmax_treated = r(max)

summarize pscore_same if Same == 0

local pmin_control = r(min)

local pmax_control = r(max)

gen common_support = pscore_same >= max(`pmin_treated', `pmin_control') ///

& pscore_same <= min(`pmax_treated', `pmax_control')

keep if common_support == 1

psmatch2 Same Size Lev Roa Loss Ddratio Dshsize Age Big4 Soe AH BM Tenure, ///

outcome(Restate) pscore(pscore_same) kernel common

capture confirm variable _weight

if !_rc {

gen psm_weight = _weight

replace psm_weight = 1 if Same == 1 & missing(psm_weight)

}

if _rc {

gen psm_weight = 1

}

logit Restate Same $controls_quality [pw = psm_weight], vce(robust)

eststo T6_M1_PSM_NoFE

logit Restate Same $controls_quality i.year i.industry_id [pw = psm_weight], vce(robust)

eststo T6_M2_PSM_FE

esttab T6_M1_PSM_NoFE T6_M2_PSM_FE using "$tables\Table6_PSM_Test.rtf", ///

b(3) z(2) star(* 0.10 ** 0.05 *** 0.01) ///

stats(N r2_p, fmt(0 3) labels("Observations" "Pseudo R2")) ///

title("Table 6. Robustness Test: PSM") ///

replace

26. Table 6 Heckman-style two-stage correction

use "$clean\final_regression_sample.dta", clear

eststo clear

probit Same Size Lev Roa Loss Ddratio Dshsize Age Big4 Soe AH BM Tenure i.year i.industry_id, vce(robust)

predict xb_selection, xb

gen normal_cdf = normal(xb_selection)

replace normal_cdf = 0.000001 if normal_cdf < 0.000001

replace normal_cdf = 0.999999 if normal_cdf > 0.999999

gen IMR = normalden(xb_selection) / normal_cdf

label variable IMR "Inverse Mills ratio"

logit Restate Same $controls_quality IMR, vce(robust)

eststo T6_M3_Heckman_NoFE

logit Restate Same $controls_quality IMR i.year i.industry_id, vce(robust)

eststo T6_M4_Heckman_FE

esttab T6_M3_Heckman_NoFE T6_M4_Heckman_FE using "$tables\Table6_Heckman_Test.rtf", ///

b(3) z(2) star(* 0.10 ** 0.05 *** 0.01) ///

stats(N r2_p, fmt(0 3) labels("Observations" "Pseudo R2")) ///

title("Table 6. Robustness Test: Heckman-Style Two-Stage Correction") ///

replace

27. Table 7 mechanism analysis

use "$clean\final_regression_sample.dta", clear

eststo clear

regress Delay Same $controls_delay i.year i.industry_id, vce(robust)

eststo T7_M1_Delay

logit Restate Same Delay $controls_quality i.year i.industry_id, vce(robust)

eststo T7_M2_Restate_Logit

margins, dydx(Same Delay Size Lev Roa Loss Ddratio Dshsize Age Big4 Soe AH BM Tenure) post

eststo T7_M2_Restate_AME

esttab T7_M1_Delay T7_M2_Restate_Logit using "$tables\Table7_Mechanism_Audit_Input.rtf", ///

b(3) t(2) z(2) star(* 0.10 ** 0.05 *** 0.01) ///

stats(N r2_a r2_p, fmt(0 3 3) labels("Observations" "Adjusted R2" "Pseudo R2")) ///

title("Table 7. Mechanism Analysis: Audit Input") ///

replace

esttab T7_M1_Delay T7_M2_Restate_AME using "$tables\Table7_Mechanism_Audit_Input_AME.rtf", ///

b(3) t(2) star(* 0.10 ** 0.05 *** 0.01) ///

stats(N, fmt(0) labels("Observations")) ///

title("Table 7. Mechanism Analysis: Average Marginal Effects") ///

replace

28. Table 8 internal control level

use "$clean\final_regression_sample.dta", clear

eststo clear

drop if missing(Ic)

logit Restate c.Same##c.Ic Size Lev Roa Age Big4 Soe Loss Tenure AH BM Ddratio Dshsize, vce(robust)

eststo T8_M1_NoFE

logit Restate c.Same##c.Ic Size Lev Roa Age Big4 Soe Loss Tenure AH BM Ddratio Dshsize ///

i.year i.industry_id, vce(robust)

eststo T8_M2_FE

esttab T8_M1_NoFE T8_M2_FE using "$tables\Table8_Internal_Control.rtf", ///

b(3) z(2) star(* 0.10 ** 0.05 *** 0.01) ///

stats(N r2_p, fmt(0 3) labels("Observations" "Pseudo R2")) ///

title("Table 8. Further Analysis: Internal Control Level") ///

replace

29. Table 9 A plus H share listing

use "$clean\final_regression_sample.dta", clear

eststo clear

logit Restate c.Same##c.AH Size Lev Roa Age Big4 Soe Loss Tenure BM Ddratio Dshsize, vce(robust)

eststo T9_M1_NoFE

logit Restate c.Same##c.AH Size Lev Roa Age Big4 Soe Loss Tenure BM Ddratio Dshsize ///

i.year i.industry_id, vce(robust)

eststo T9_M2_FE

esttab T9_M1_NoFE T9_M2_FE using "$tables\Table9_AH_Listing.rtf", ///

b(3) z(2) star(* 0.10 ** 0.05 *** 0.01) ///

stats(N r2_p, fmt(0 3) labels("Observations" "Pseudo R2")) ///

title("Table 9. Further Analysis: A plus H Share Listing") ///

replace

30. Table 10 industry concentration

use "$clean\final_regression_sample.dta", clear

eststo clear

drop if missing(HHI)

logit Restate c.Same##c.HHI Size Lev Roa Age Big4 Soe Loss Tenure AH BM Ddratio Dshsize, vce(robust)

eststo T10_M1_NoFE

logit Restate c.Same##c.HHI Size Lev Roa Age Big4 Soe Loss Tenure AH BM Ddratio Dshsize ///

i.year i.industry_id, vce(robust)

eststo T10_M2_FE

esttab T10_M1_NoFE T10_M2_FE using "$tables\Table10_Industry_Concentration.rtf", ///

b(3) z(2) star(* 0.10 ** 0.05 *** 0.01) ///

stats(N r2_p, fmt(0 3) labels("Observations" "Pseudo R2")) ///

title("Table 10. Further Analysis: Industry Concentration") ///

replace

31. Table 11 analyst attention

use "$clean\final_regression_sample.dta", clear

eststo clear

capture noisily logit Restate c.Same##c.Analyst Size Lev Roa Age Big4 Soe Loss Tenure AH BM Ddratio Dshsize ///

i.year i.industry_id, vce(robust)

if !_rc {

eststo T11_M1_Analyst

}

capture noisily logit Restate c.Same##c.Research Size Lev Roa Age Big4 Soe Loss Tenure AH BM Ddratio Dshsize ///

i.year i.industry_id, vce(robust)

if !_rc {

eststo T11_M2_Research

}

capture noisily logit Restate c.Same##c.LnAnalyst Size Lev Roa Age Big4 Soe Loss Tenure AH BM Ddratio Dshsize ///

i.year i.industry_id, vce(robust)

if !_rc {

eststo T11_M3_LnAnalyst

}

capture noisily logit Restate c.Same##c.LnResearch Size Lev Roa Age Big4 Soe Loss Tenure AH BM Ddratio Dshsize ///

i.year i.industry_id, vce(robust)

if !_rc {

eststo T11_M4_LnResearch

}

esttab T11_M1_Analyst T11_M2_Research T11_M3_LnAnalyst T11_M4_LnResearch ///

using "$tables\Table11_Analyst_Attention.rtf", ///

b(3) z(2) star(* 0.10 ** 0.05 *** 0.01) ///

stats(N r2_p, fmt(0 3) labels("Observations" "Pseudo R2")) ///

title("Table 11. Further Analysis: Analyst Attention") ///

replace

32. Table 12 economic consequences

use "$clean\final_regression_sample.dta", clear

eststo clear

regress Fee Same Size Lev Roa Loss Ddratio Dshsize Age Big4 Soe AH BM Tenure i.year i.industry_id, vce(robust)

eststo T12_M1_Fee

regress TbinQ Same Size Lev Roa Loss Ddratio Dshsize Age Big4 Soe AH BM Tenure Fee i.year i.industry_id, vce(robust)

eststo T12_M2_TbinQ

capture confirm variable roe

if !_rc {

gen Roe = roe

}

else {

gen Roe = .

}

capture confirm variable growth

if !_rc {

gen Growth = growth

}

else {

gen Growth = .

}

capture noisily regress TbinQ Same Size Lev Roa Loss Ddratio Dshsize Age Big4 Soe AH BM Tenure Fee Roe Growth ///

i.year i.industry_id, vce(robust)

if !_rc {

eststo T12_M3_TbinQ_Extended

}

esttab T12_M1_Fee T12_M2_TbinQ T12_M3_TbinQ_Extended using "$tables\Table12_Economic_Consequences.rtf", ///

b(3) t(2) star(* 0.10 ** 0.05 *** 0.01) ///

stats(N r2_a, fmt(0 3) labels("Observations" "Adjusted R2")) ///

title("Table 12. Economic Consequences: Audit Fees and Firm Value") ///

replace

33. Additional robustness using Probit model

use "$clean\final_regression_sample.dta", clear

eststo clear

probit Restate Same $controls_quality, vce(robust)

eststo A1_M1_Probit_NoFE

probit Restate Same $controls_quality i.year i.industry_id, vce(robust)

eststo A1_M2_Probit_FE

margins, dydx(Same Size Lev Roa Loss Ddratio Dshsize Age Big4 Soe AH BM Tenure) post

eststo A1_M2_Probit_AME

esttab A1_M1_Probit_NoFE A1_M2_Probit_FE using "$tables\Appendix_Probit_Robustness.rtf", ///

b(3) z(2) star(* 0.10 ** 0.05 *** 0.01) ///

stats(N r2_p, fmt(0 3) labels("Observations" "Pseudo R2")) ///

title("Appendix. Probit Robustness Test") ///

replace

esttab A1_M2_Probit_AME using "$tables\Appendix_Probit_AME.rtf", ///

b(3) t(2) star(* 0.10 ** 0.05 *** 0.01) ///

stats(N, fmt(0) labels("Observations")) ///

title("Appendix. Probit Average Marginal Effects") ///

replace

34. Additional robustness using linear probability model

use "$clean\final_regression_sample.dta", clear

eststo clear

regress Restate Same $controls_quality, vce(robust)

eststo A2_M1_LPM_NoFE

regress Restate Same $controls_quality i.year i.industry_id, vce(robust)

eststo A2_M2_LPM_FE

reghdfe Restate Same $controls_quality, absorb(year industry_id) vce(cluster firm_id)

eststo A2_M3_LPM_HD_FE

esttab A2_M1_LPM_NoFE A2_M2_LPM_FE A2_M3_LPM_HD_FE using "$tables\Appendix_LPM_Robustness.rtf", ///

b(3) t(2) star(* 0.10 ** 0.05 *** 0.01) ///

stats(N r2 r2_a, fmt(0 3 3) labels("Observations" "R2" "Adjusted R2")) ///

title("Appendix. Linear Probability Model Robustness Test") ///

replace

35. Balance test after PSM

use "$clean\final_regression_sample.dta", clear

logit Same Size Lev Roa Loss Ddratio Dshsize Age Big4 Soe AH BM Tenure i.year i.industry_id, vce(robust)

predict pscore_balance, pr

capture noisily psmatch2 Same Size Lev Roa Loss Ddratio Dshsize Age Big4 Soe AH BM Tenure, ///

pscore(pscore_balance) kernel common

capture noisily pstest Size Lev Roa Loss Ddratio Dshsize Age Big4 Soe AH BM Tenure, both graph

capture graph export "$tables\PSM_Balance_Test.png", replace

36. Export selected replication dataset

use "$clean\final_regression_sample.dta", clear

keep stkcd year firm_id industry_id industry_code company_name ///

Restate Same Same_Big4 Delay Lag Fee TbinQ ///

Size Lev Roa Loss Ddratio Dshsize Age Big4 Soe AH BM Tenure ///

Rece Inv Opinion First Ic HHI Analyst Research LnAnalyst LnResearch ///

EAR Absda_NL Absda_MJ final_sample

order stkcd year firm_id industry_id industry_code company_name ///

Restate Same Same_Big4 Delay Lag Fee TbinQ ///

Size Lev Roa Loss Ddratio Dshsize Age Big4 Soe AH BM Tenure ///

Rece Inv Opinion First Ic HHI Analyst Research LnAnalyst LnResearch ///

EAR Absda_NL Absda_MJ final_sample

save "$clean\replication_dataset_selected_variables.dta", replace

export delimited using "$clean\replication_dataset_selected_variables.csv", replace

export excel using "$clean\replication_dataset_selected_variables.xlsx", firstrow(variables) replace

37. Generate data availability checklist

clear

input str80 item str20 status str150 note

"Manual ESG assurance dataset" "Prepared" "Includes ESG assurance provider, audit firm, locations, and Same coding."

"CSMAR extracted variables" "Restricted" "Commercial database extracts should be used only according to license terms."

"Dibo Internal Control Index" "Restricted" "Commercial database extracts should be used only according to license terms."

"Cleaned regression dataset" "Prepared" "Constructed from licensed raw data and manually collected ESG assurance data."

"Variable dictionary" "Prepared" "Generated from Stata variable names and variable labels."

"Sample selection process" "Prepared" "Exported as sample_selection_process.xlsx."

"Replication code" "Prepared" "This do-file reproduces data cleaning, variable construction, tables, and regressions."

"Regression outputs" "Prepared" "Saved in the outputs/tables folder."

end

export excel using "$tables\Data_Availability_Checklist.xlsx", firstrow(variables) replace

38. Close log

log close _all

display as result "Replication code completed successfully."

display as result "Please review all exported tables and logs before submission."
