# Supplementary material
Source: Research Square preprint supplement (doi:10.21203/rs.3.rs-9809611/v1)
Supplement: Supplementary file 7 [file acc722f5f6e9306102d8fafa.xlsx]

## Sheet: 模板
TradingYear	Symbol	ShortName	OpenPrice	ClosePrice	HighClosePrice	LowClosePrice	ChangeRatio	TurnoverRate	Volume	Amount	TradingDays	MarketValue	CirculatedMarketValue	Yretwd	Yretnd
交易年份	股票代码	股票简称	年开盘价	年收盘价	年最高收盘价	年最低收盘价	年涨跌幅	年换手率	年成交量	年成交额	年交易天数	总市值	流通市值	考虑现金红利再投资年个股回报率	不考虑现金红利再投资本年个股回报率
			元/美元/港元	元/美元/港元	元/美元/港元	元/美元/港元			股	元/美元/港元	天	元	元
2016	601006	大秦铁路	8.62	7.08	8.49	6.01	-0.17865	0.78786	11712938675	79249614437	244	1.05257e+11	1.05257e+11	-0.117963	-0.12645
2017	601006	大秦铁路	7.06	9.07	9.4	6.85	0.28107	0.7233	10753203662	89548180207	244	1.34842e+11	1.34842e+11	0.319659	0.316384
2018	601006	大秦铁路	9.15	8.23	10.22	7.59	-0.09261	0.67129	9979873738	87986571636	243	1.22354e+11	1.22354e+11	-0.039898	-0.040794
2015	601009	南京银行	14.78	17.7	22.8	12.21	0.20819	5.36448	18056605810	302865801885	239	5.95774e+10	5.25501e+10	0.249795	0.242321
2016	601009	南京银行	17.7	10.84	17.94	9.22	-0.38757	1.19531	7242037664	88679089359	244	6.56765e+10	6.2481e+10	0.127524	0.124972
2017	601009	南京银行	11.08	7.74	12.47	7.55	-0.28598	1.25073	10608979193	102316084356	242	6.56523e+10	6.2458e+10	0.022078	0.023616
2018	601009	南京银行	7.76	6.46	10.27	6.44	-0.16537	1.50309	12749510804	104448526724	243	5.47951e+10	5.47951e+10	-0.125659	-0.120801
2017	601012	隆基股份	13.4	36.44	42.34	13.51	1.72143	2.70693	5397586219	133361047373	244	7.2661e+10	7.16499e+10	1.73841	1.7289
2018	601012	隆基股份	36.8	17.44	39.25	12.22	-0.52141	2.17334	6065333507	138601268319	243	4.86713e+10	4.85134e+10	-0.326438	-0.325027
2015	601016	节能风电	10.27	15.78	34.38	10.03	0.53951	2.08502	4332214133	80844718307	235	32787368400	12904568400	0.541962	0.54401
2015	601018	宁波港	4.63	8.16	13.15	4.15	0.77391	2.19972	28156470842	225975095672	143	104448000000	104448000000	0.788364	0.792174
2016	601018	宁波港	7.34	5.06	7.39	4.74	-0.3799	0.71958	9478903778	54484629781	208	6.66546e+10	64768000000	-0.370014	-0.369485
2017	601018	宁波港	5.07	5.31	6.79	5.07	0.04941	0.83034	10938000194	63673440357	244	6.99478e+10	67968000000	0.062451	0.062846
2018	601018	宁波港	5.31	3.34	5.52	3.31	-0.371	0.20149	2654195525	12348721588	243	4.39973e+10	42752000000	-0.361391	-0.356874
2015	601021	春秋航空	21.79	61	141.22	26.15	2.35903	1.28755	1030038246	87138492082	215	48800000000	12200000000
2016	601021	春秋航空	60.99	36.74	58.56	36.19	-0.3977	0.82997	664460706	31526074225	237	29413309200	7348000000	-0.395141	-0.394262
2017	601021	春秋航空	36.78	37.27	41.71	30.59	0.01443	0.90646	725695622	25798737952	244	29837616600	7454000000	0.019354	0.018781
2018	601021	春秋航空	37.25	31.81	40.22	29.79	-0.1465	0.62589	573873348	19683082278	243	2.91665e+10	2.54264e+10	-0.142247	-0.141481
2018	601066	中信建投	6.5	8.71	11.8	6.4	0.60701	0.89718	6860191079	64613930165	132	6.66e+10	1.44675e+10
2015	601088	中国神华	20.32	14.97	26.29	13.79	-0.2622	1.00921	20072898985	409173463413	244	2.97748e+11	2.97748e+11	-0.238836	-0.225727
2016	601088	中国神华	14.96	16.18	18.19	12.99	0.08083	0.24884	4949324219	75333182197	244	3.21814e+11	3.21814e+11	0.105031	0.102204
2017	601088	中国神华	16.19	23.17	24.4	16.19	0.43201	0.24473	4867684447	100874983306	180	4.60843e+11	4.60843e+11	0.632159	0.615575
2018	601088	中国神华	23.3	17.96	28.69	17.19	-0.22486	0.31636	6292264828	137477558212	243	3.57218e+11	3.57218e+11	-0.186855	-0.185585
2015	601098	中南传媒	16.6	23.9	32.58	16.28	0.43976	2.23349	4011341976	90535246623	244	42924400000	42924400000	0.452384	0.456024
2015	601099	太平洋	14.28	9.82	16.92	6.35	-0.30942	11.7871	41613996625	497279609626	244	3.46692e+10	3.24597e+10	-0.307029	-0.305907
2016	601099	太平洋	9.78	5.15	8.89	4.7	-0.47556	4.38621	29897781468	185338830294	238	3.5104e+10	3.33659e+10	-0.117659	-0.089816
2017	601099	太平洋	5.15	3.62	5.37	3.6	-0.29709	2.50614	17082641622	75078305692	234	2.46751e+10	2.34533e+10	-0.292572	-0.291262
2015	601106	中国一重	5.59	7.97	20.98	4.8	0.42832	8.44946	55242594061	624573856516	244	52107860000	52107860000	0.428465	0.42853
2018	601108	财通证券	18.41	7.22	21.91	6.63	-0.60718	2.01479	7231073084	89805963879	243	25912580000	1.73763e+10	-0.600363	-0.597388
2015	601111	中国国航	7.98	8.58	15.36	6.84	0.09439	1.79344	23466752741	245475720050	223	1.12267e+11	1.10613e+11	0.098327	0.101046
2016	601111	中国国航	8.5	7.2	8.45	6.14	-0.16084	0.6403	8378104494	61963493795	244	9.42102e+10	9.42102e+10	-0.147556	-0.148368
2017	601111	中国国航	7.18	12.32	12.35	7.21	0.71111	0.7018	10193461836	95531259750	244	1.78946e+11	1.61204e+11	0.730448	0.726069
2018	601111	中国国航	12.32	7.64	14.36	6.98	-0.37987	1.00179	14550744429	146273648633	243	1.1097e+11	1.07047e+11	-0.371034	-0.370536
2015	601117	中国化学	9.54	6.89	13.75	6.02	-0.2709	4.93585	24348540948	240326360241	244	33988370000	33988370000	-0.261872	-0.259788
2016	601117	中国化学	6.91	6.77	6.85	5.25	-0.01742	1.1714	5778530160	34730808570	241	33396410000	33396410000	-0.00242	-0.00479
2017	601117	中国化学	6.81	6.75	9.27	6.18	-0.00295	1.91694	9456288125	70126926562	244	33297750000	33297750000	0.011898	0.012999
2018	601117	中国化学	6.76	5.36	8.15	5.33	-0.20593	1.19538	5896787741	40087215109	243	26440880000	26440880000	-0.194514	-0.191852
2015	601118	海南橡胶	8.72	7.56	13.76	6	-0.13303	5.59229	21984260415	211060188405	241	29719657296	29719657296	-0.132901	-0.132798
2016	601118	海南橡胶	7.51	6.96	7.87	4.81	-0.07937	2.65974	10455885900	65611662277	240	27360954336	27360954336	-0.079364	-0.079365
2016	601127	小康股份	6.97	26.74	42.49	8.37	3.60241	1.24586	1111928884	37073403907	126	23865450000	3810450000
2018	601138	工业富联	16.52	11.59	25.72	11.38	-0.15832	0.37559	7397447709	127665666986	139	2.28269e+11	1.29563e+10
2016	601155	新城控股	20.18	11.75	18.29	8.85	-0.42147	2.37632	5368064683	66725350743	235	2.65431e+10	8.28004e+09	-0.242274	-0.24259
2017	601155	新城控股	11.78	29.3	29.3	11.88	1.49362	1.58883	3588346121	64617620687	242	6.61736e+10	2.10797e+10	1.54914	1.5217
2018	601155	新城控股	29.55	23.69	44.92	19.89	-0.19147	1.94817	4396489391	136005102504	243	5.34618e+10	5.32074e+10	-0.171002	-0.163823
2015	601166	兴业银行	16.83	17.07	20.7	12.2	0.03455	3.93171	74908293253	1275880740812	244	3.25223e+11	2.76186e+11	0.06529	0.069091
2016	601166	兴业银行	17.05	16.14	17.3	14.1	-0.05448	0.66672	12702652130	200417992563	239	3.07505e+11	3.07505e+11	-0.017054	-0.018746
2017	601166	兴业银行	16.14	16.99	18.21	15.21	0.05266	0.86425	17954151576	304908845177	244	3.52954e+11	3.23699e+11	0.092998	0.090458
2018	601166	兴业银行	17.05	14.94	19.41	13.82	-0.12066	0.89356	18562899686	315743953795	243	3.10366e+11	2.84642e+11	-0.083593	-0.082401
2015	601169	北京银行	11.03	10.53	15.39	7.14	-0.0366	3.68785	46733253800	538972054422	213	1.33439e+11	1.33439e+11	0.179022	0.178957
2016	601169	北京银行	10.54	9.76	10.76	8.35	-0.07312	0.7013	10664384567	103795611391	244	1.48417e+11	1.48417e+11	0.13932	0.135992
2017	601169	北京银行	9.77	7.15	10.19	7.05	-0.26742	0.43123	9117503296	75254931324	236	1.51172e+11	1.30473e+11	-0.096962	-0.095287
2018	601169	北京银行	7.13	5.61	7.8	5.59	-0.21538	0.43171	9127607135	60204153036	243	1.18612e+11	1.02371e+11	-0.179513	-0.178042
2015	601179	中国西电	7.78	6.81	14.14	5.74	-0.12355	4.23975	21732446285	204519907323	244	3.49073e+10	29671170000	-0.117036	-0.110682
2015	601186	中国铁建	15.44	13.48	27.09	10.92	-0.11664	3.18999	43318604636	781657120679	244	183052219420	166310059420	-0.10899	-0.106815
2016	601186	中国铁建	13.5	11.96	13.98	8.76	-0.11276	1.08681	14758330590	159159632168	244	162411316340	162411316340	-0.0982	-0.101632
2017	601186	中国铁建	11.94	11.14	14.19	11.13	-0.06856	0.93197	12655658264	159748435502	244	151276092310	151276092310	-0.05739	-0.055184
2018	601186	中国铁建	11.16	10.87	12.16	8.16	-0.02424	0.7936	10776725052	115704333819	243	147609616105	147609616105	-0.002896	-0.008079
2015	601198	东兴证券	11.02	29.97	42.44	13.22	2.26471	5.15603	12910706369	348311302068	203	75044880000	14985000000
2016	601198	东兴证券	29.5	20.06	28.08	19.28	-0.33066	3.34714	9231282699	220960948730	244	5.53247e+10	18134240000	-0.323721	-0.322322
2017	601198	东兴证券	20.05	14.4	20.24	14.33	-0.28215	0.88997	2454498544	44524108781	244	3.97146e+10	1.81146e+10	-0.27586	-0.274676
2018	601198	东兴证券	14.42	9.56	16.18	8.23	-0.33611	1.1723	3233148100	40597633555	243	2.63661e+10	2.63661e+10	-0.326203	-0.325694
2015	601211	国泰君安	23.65	23.9	34.82	17.55	0.21258	2.01825	15389132539	403119566221	128	182237500000	36447500000
2016	601211	国泰君安	23.76	18.59	22.29	16.34	-0.22218	1.14977	8767021974	162699949056	244	141748750000	8.87488e+10	-0.199363	-0.200418
2017	601211	国泰君安	18.54	18.52	21.81	17.74	-0.00377	0.8194	7140236509	141724777300	244	161382053976	1.09833e+11	0.017653	0.017214
2018	601211	国泰君安	18.53	15.32	21.38	13.46	-0.17279	0.60004	5228678612	87606822197	243	1.33498e+11	1.33498e+11	-0.150338	-0.151188
2017	601212	白银有色	2.14	6.76	16.6	2.56	2.79775	1.83397	12788186123	136834412932	180	4.71372e+10	4718480000
2018	601212	白银有色	6.73	2.95	7.56	2.93	-0.56361	0.64491	4496964528	23892626597	238	2.05702e+10	5.79579e+09	-0.562401	-0.561982
2015	601216	君正集团	11.1	11.45	35.7	8.85	0.09674	4.22148	15562060980	241957811358	231	42209280000	42209280000	0.978364	0.977969
2016	601216	君正集团	11.45	4.65	10.31	3.84	-0.59389	1.42892	12057217898	69841561091	241	3.92368e+10	34283520000	-0.185727	-0.186026
2017	601216	君正集团	4.6	4.71	5.76	4.38	0.0129	1.99732	16853395118	87089527242	233	3.97431e+10	3.97431e+10	0.016633	0.017204
2018	601216	君正集团	4.71	2.62	4.81	2.6	-0.44374	0.54442	4593863427	15879106733	173	2.21076e+10	2.21076e+10	-0.406164	-0.403397
2015	601225	陕西煤业	6.65	4.86	12.2	4.28	-0.26917	1.25102	12510171976	93642924303	244	48600000000	13170600000	-0.266535	-0.264662
2016	601225	陕西煤业	4.84	4.85	6.97	3.72	-0.00206	0.89015	8901460936	47933725189	244	48500000000	13143500000	-0.002058	-0.002058
2017	601225	陕西煤业	4.85	8.16	9.07	4.88	0.68247	1.72213	17221274406	130731219826	244	81600000000	81600000000	0.703846	0.705155
2018	601225	陕西煤业	8.28	7.44	10.56	7.07	-0.08824	1.61627	16162705338	135157539083	243	74400000000	74400000000	-0.037957	-0.03701
2017	601228	广州港	2.75	6.11	11.29	3.3	1.66812	1.59304	9865978091	87067634838	188	37840329800	4268934800
2018	601228	广州港	6.08	3.96	6.55	3.93	-0.35188	0.58013	3592864256	19984561876	243	24524992800	5714992800	-0.34757	-0.346318
2017	601229	上海银行	23.33	14.18	27.21	14.15	-0.39089	0.62073	4845301119	102863190875	244	110686031300	5.25638e+10	-0.193269	-0.186684
2018	601229	上海银行	14.23	11.19	16.61	10.26	-0.21086	0.51398	5616873091	77691141135	243	122285427810	5.81385e+10	0.142088	0.140056
2017	601238	广汽集团	23.29	24.66	28.72	22.69	0.06431	0.26637	1939847913	51086475710	244	1.79587e+11	1.61009e+11	0.076946	0.078118
2018	601238	广汽集团	24.68	10.29	25.32	10.14	-0.58273	0.16681	1706689634	25687910062	243	1.05292e+11	9.44391e+10	-0.396686	-0.392701
2015	601258	庞大集团	5.95	3.92	15.97	3.65	-0.34118	4.67917	30321582909	200862533188	241	2.5402e+10	2.5402e+10	0.317646	0.317647
2015	601288	农业银行	3.76	3.23	4.13	2.74	-0.12938	0.63642	206705846010	755110700726	244	1049084997910	1049084997910	-0.089166	-0.080323
2016	601288	农业银行	3.24	3.1	3.28	2.89	-0.04025	0.09522	30925337549	97142692500	244	1006861762700	1006861762700	0.011394	0.011393
2017	601288	农业银行	3.1	3.83	3.91	3.12	0.23548	0.16662	54117911237	192224526199	244	1243961468110	1243961468110	0.296011	0.290323
2018	601288	农业银行	3.84	3.6	4.75	3.31	-0.06005	0.23034	80615340811	316732892838	243	1.25994e+12	1169258821200	-0.013885	-0.013499
2015	601318	中国平安	77.8	36	93.17	25.11	-0.51814	2.1396	39112435348	2464264725723	244	658088690760	658088690760	-0.023906	-0.024762
2016	601318	中国平安	35.84	35.43	37.03	28.96	-0.01583	0.57502	10511502310	346341756226	244	6.47669e+11	6.47669e+11	0.000631	-0.000556
2017	601318	中国平安	35.34	69.98	78.44	35.21	0.97516	0.94905	17348827465	918803017439	244	1.27925e+12	1.27925e+12	1.01446	1.0048
2018	601318	中国平安	70.21	56.1	78.76	55.22	-0.19834	0.99573	18202129565	1202486219339	243	1025521543101	1025521543101	-0.174872	-0.172335
2015	601328	交通银行	6.83	6.44	9.4	5.05	-0.05294	1.37087	101804400050	737012761299	244	4.78252e+11	4.78252e+11	-0.018293	-0.013235
2016	601328	交通银行	6.43	5.77	6.21	5.08	-0.10404	0.26541	19710312723	111076174801	244	4.28496e+11	4.28496e+11	-0.061145	-0.062112
2017	601328	交通银行	5.75	6.21	6.7	5.78	0.07626	0.28411	21099084200	131326382165	244	4.61172e+11	4.61172e+11	0.125782	0.12331
2018	601328	交通银行	6.21	5.79	7.18	5.42	-0.06763	0.31714	23551685913	148048196713	243	4.29981e+11	4.29981e+11	-0.020082	-0.021643
2015	601333	广深铁路	4.72	5.01	8.77	4.05	0.10841	5.11032	36199168712	218585918942	244	35488520370	35488520370	0.118922	0.119469
2016	601333	广深铁路	4.97	5.07	5.31	3.26	0.01198	1.1518	8158799303	34837941375	244	35913532590	35913532590	0.032013	0.027944
2017	601333	广深铁路	5.12	5.57	5.77	4.22	0.09862	1.52341	10791135363	55514031706	244	39455301090	39455301090	0.115954	0.114398
2015	601336	新华保险	50.35	52.21	70.06	30.31	0.05347	2.73444	8530215196	445772595400	219	162871527986	162871527986	0.059058	0.057708
2016	601336	新华保险	51.75	43.78	48.12	33.82	-0.16146	0.92535	2886687550	118301704152	244	136573750148	136573750148	-0.155565	-0.1561
2017	601336	新华保险	43.78	70.2	71.72	40.92	0.60347	0.92926	2898857666	163337099093	244	218992171320	218992171320	0.616182	0.614436
2018	601336	新华保险	70.21	42.24	70.9	40.95	-0.39829	1.33338	4159543567	205582260856	243	131769648384	131769648384	-0.391318	-0.390883
2018	601360	三六零	65.67	20.37	56.92	20.16	-0.67789	0.34438	2329430974	81410158287	197	1.37784e+11	8.09061e+09
2015	601377	兴业证券	15.21	11	18.89	7.43	-0.27249	7.80181	40569416968	555803013563	241	57200000000	57200000000	-0.270355	-0.26918
2016	601377	兴业证券	9.4	7.65	9.36	7.16	-0.30455	3.13592	21000217759	171451080241	240	5.12295e+10	5.12295e+10	-0.252693	-0.252795
2017	601377	兴业证券	7.65	7.28	8.81	7.12	-0.04837	1.69358	11341328500	90118395468	239	4.87518e+10	4.87518e+10	-0.030678	-0.028758
2018	601377	兴业证券	7.32	4.64	8.11	3.91	-0.36264	1.39621	9349977628	53059317914	243	3.10726e+10	3.10726e+10	-0.341345	-0.342033
2015	601390	中国中铁	9.37	10.92	22.64	7.67	0.17419	3.65644	83528891860	1224544964735	232	2.4946e+11	232594908000	0.178862	0.182581
2016	601390	中国中铁	10.93	8.86	10.24	6.59	-0.18864	0.77898	17795259598	148148682817	244	2.02401e+11	1.99664e+11	-0.178634	-0.180769
2017	601390	中国中铁	8.84	8.39	9.69	8.39	-0.05305	0.59217	13527607059	121215437334	244	1.91664e+11	1.89072e+11	-0.043392	-0.043115
2018	601390	中国中铁	8.41	6.99	8.78	6.92	-0.16687	0.25744	5881097646	45400491850	169	1.59682e+11	1.59682e+11	-0.153339	-0.153397
2015	601398	工商银行	4.93	4.58	5.79	3.89	-0.05955	0.35591	126848883543	636370805718	244	1.63234e+12	1.63234e+12	-0.017704	-0.007105
2016	601398	工商银行	4.58	4.41	4.63	3.97	-0.03712	0.06323	22535476520	97967327310	244	1.57175e+12	1.57175e+12	0.015245	0.013821
2017	601398	工商银行	4.4	6.2	6.34	4.43	0.4059	0.10752	38320487212	212034623778	244	2.20972e+12	2.20972e+12	0.470994	0.459025
2018	601398	工商银行	6.19	5.29	7.75	5.08	-0.14677	0.14636	52165177572	316139150434	243	1.88539e+12	1.88539e+12	-0.108443	-0.107935
2015	601555	东吴证券	22.3	16.07	29.19	10.31	-0.28323	6.64382	17938302063	358519309872	240	43389000000	41637370000	-0.278872	-0.277654
2016	601555	东吴证券	15.94	13.27	15.71	9.88	-0.17424	3.90309	11709267043	153912013796	242	39810000000	34382570000	-0.153965	-0.155569
2017	601555	东吴证券	13.24	9.72	13.46	9.59	-0.26752	1.75823	5274695563	63361171189	244	29160000000	28100520000	-0.257605	-0.256217
2018	601555	东吴证券	9.78	6.7	10.42	5.05	-0.3107	1.1534	3460213277	26115860839	243	20100000000	19369700000	-0.29784	-0.295267
2015	601600	中国铝业	6.25	4.97	10.57	4.63	-0.2048	3.84387	57288302829	424072028587	244	7.40719e+10	6.72167e+10	-0.204802	-0.2048
2016	601600	中国铝业	4.96	4.22	4.91	3.6	-0.15091	1.54067	22961824844	98336621679	244	6.2894e+10	6.2894e+10	-0.150905	-0.150905
2017	601600	中国铝业	4.23	8.09	8.12	4.16	0.91706	1.98574	29595140710	176131935289	170	1.20572e+11	1.20572e+11	0.917061	0.917062
2018	601600	中国铝业	7.28	3.55	7.28	3.43	-0.56119	1.68719	25145576386	112427370114	208	5.29085e+10	5.29085e+10	-0.561187	-0.561187
2015	601601	中国太保	33	28.86	36.96	19.01	-0.1065	2.10336	19060616706	602866653844	244	261529320000	261529320000	-0.091081	-0.091022
2016	601601	中国太保	28.69	27.77	31.14	22.48	-0.03777	0.32056	2904917406	77723107636	244	251651740000	251651740000	-0.000502	-0.003119
2017	601601	中国太保	27.63	41.42	47.76	25.66	0.49154	0.53817	4876877181	169043813101	244	375348040000	375348040000	0.520981	0.516745
2018	601601	中国太保	41.58	28.43	43.07	28.25	-0.31362	0.66409	6017993803	212495517636	243	257632660000	257632660000	-0.296628	-0.294302
2015	601607	上海医药	16.58	19.91	31.08	16.04	0.20667	3.11739	8382392829	189515964866	244	5.35362e+10	5.35346e+10	0.220519	0.224242
2016	601607	上海医药	20.02	19.56	20.84	15.15	-0.01758	0.90389	2430472117	45669517970	244	5.25951e+10	5.25935e+10	-0.000588	-0.001005
2017	601607	上海医药	19.57	24.19	28.88	19.86	0.23671	1.10568	2973076087	71732578361	244	6.50447e+10	6.50428e+10	0.253142	0.255112
2018	601607	上海医药	24.28	17	27.04	16.9	-0.29723	0.86262	2451634725	56399538602	243	48315518474	48314131274	-0.286488	-0.281521
2015	601608	中信重工	7.07	6.85	28.2	5.35	-0.0256	2.40554	10071091677	126426875877	165	2.86784e+10	28153500000	0.470907	0.470839
2016	601608	中信重工	6.9	5.61	7.27	4.41	-0.18102	2.00082	8682399194	50067214074	244	2.43441e+10	2.31524e+10	-0.177559	-0.177664
2016	601611	中国核建	4.16	17.19	23.68	5	3.95389	2.29395	6021620051	110750353770	140	45123750000	9024750000
2017	601611	中国核建	17.21	10.27	18.73	9.5	-0.40256	1.91346	5022823494	73180744647	244	26958750000	9877686000	-0.398973	-0.398487
2015	601618	中国中冶	5.06	6.02	11.03	3.77	0.19208	3.37874	64567734735	474321591728	172	115042200000	115042200000	0.202062	0.20198
2016	601618	中国中冶	6.02	4.66	5.6	3.57	-0.22591	1.23204	23544289238	103689741744	244	89052600000	89052600000	-0.214998	-0.216777
2017	601618	中国中冶	4.67	4.84	5.64	4.69	0.03863	0.92625	19195345848	99329500143	244	1.00302e+11	92492400000	0.050563	0.051502
2018	601618	中国中冶	4.84	3.11	4.88	3.07	-0.35744	0.30743	6371122577	23670016438	243	6.44505e+10	6.44505e+10	-0.343869	-0.343388
2015	601628	中国人寿	34.5	28.31	41.19	21.35	-0.17101	0.67221	18999823870	663722864906	244	800173798550	800173798550	-0.162015	-0.159297
2016	601628	中国人寿	28.29	24.09	26.92	19.66	-0.14906	0.11105	3138885427	70956533912	244	680896743450	680896743450	-0.131536	-0.134228
2017	601628	中国人寿	24.19	30.45	34.7	23.81	0.26401	0.15753	4452551892	127243326550	244	860660267250	860660267250	0.275315	0.273973
2018	601628	中国人寿	30.52	20.39	31.95	20.33	-0.33038	0.09706	2743292302	71690183845	243	576317334950	576317334950	-0.318798	-0.317241
2015	601633	长城汽车	41.55	12.04	58.17	11.36	-0.71023	0.48075	4387939870	121200836671	229	109892318760	109892318760	-0.111405	-0.105415
2016	601633	长城汽车	12	11.06	11.49	7.94	-0.0814	0.42105	3842995041	37259652929	244	100947595140	100947595140	-0.061006	-0.065615
2017	601633	长城汽车	11.1	11.49	14.92	10.86	0.03888	0.54226	4949385135	63460280367	237	104872320810	104872320810	0.069537	0.070524
2018	601633	长城汽车	11.6	5.6	12.84	5.56	-0.51262	0.27659	2524487206	21334219302	243	51112706400	51112706400	-0.50492	-0.497824
2015	601668	中国建筑	7.38	6.34	11.99	5.02	-0.12912	5.02114	150634292709	1211143358046	244	190200000000	1.8957e+11	-0.112497	-0.105495
2016	601668	中国建筑	6.33	8.86	11.15	4.96	0.39748	1.90203	57060783113	438399924056	244	265800000000	2.65329e+11	0.45164	0.429022
2017	601668	中国建筑	8.83	9.02	10.7	8.54	0.01806	1.89298	56789430903	542161253768	244	270600000000	2.6818e+11	0.04185	0.042325
2018	601668	中国建筑	9.01	5.7	10.67	4.96	-0.36807	0.80901	33966552267	266152398834	243	2.39315e+11	2.37259e+11	-0.090416	-0.091463
2015	601669	中国电建	8.45	8.03	18.28	6.42	-0.04745	3.63562	50006608816	546978673392	238	1.1045e+11	26499000000	-0.041208	-0.035587
2016	601669	中国电建	8	7.26	8.38	5.54	-0.09589	0.94225	12960333010	88616080552	235	9.98586e+10	69696000000	-0.084111	-0.086301
2017	601669	中国电建	7.26	7.22	8.75	7.02	-0.00551	0.92727	14186374055	112557419302	244	1.10459e+11	69312000000	0.004872	0.006253
2018	601669	中国电建	7.22	4.86	7.79	4.62	-0.32687	0.2792	4271508049	24750342157	243	7.43533e+10	5.41618e+10	-0.315241	-0.314044
2015	601688	华泰证券	24.89	19.72	33.29	12.41	-0.19412	4.49676	32209225306	790711469399	244	141249800736	141249800736	-0.180283	-0.173682
2016	601688	华泰证券	19.64	17.86	21.7	13.25	-0.09432	1.52614	10931381108	197784122600	244	127927050768	127927050768	-0.070105	-0.068966
2017	601688	华泰证券	17.92	17.26	23.43	16.45	-0.03359	1.47024	10531015239	205746788615	244	123629389488	123629389488	-0.008752	-0.005599
2018	601688	华泰证券	17.31	16.2	21.66	13.91	-0.06141	1.48025	12214310797	209334193140	243	133674300000	116036854560	-0.045213	-0.044032
2015	601718	际华集团	6.3	11.47	25.96	5.46	0.8063	7.8952	30451799197	382036354946	234	44239790000	44239790000	0.813723	0.813543
2016	601718	际华集团	11.54	9.21	10.33	7.19	-0.19704	3.52746	13605425836	120164447737	244	35522970000	35522970000	-0.192515	-0.193025
2017	601718	际华集团	9.25	6.73	10.35	6.57	-0.26927	1.56901	6890512677	60926434278	244	2.95557e+10	25957610000	-0.265113	-0.264061
2015	601727	上海电气	8.5	11.54	25	8.52	0.39879	3.29343	42235999020	627031728952	201	1.47992e+11	1.47992e+11	0.405278	0.405903
2016	601727	上海电气	11.54	8.42	10.4	7.28	-0.27036	0.32374	4348158935	37050385802	158	1.1309e+11	1.07981e+11	-0.270364	-0.270364
2017	601727	上海电气	8.46	6.69	8.98	6.54	-0.20546	0.34009	5007918862	39170898662	156	9.85114e+10	8.57947e+10	-0.205464	-0.205463
2018	601727	上海电气	6.68	4.94	6.98	4.87	-0.26158	0.1554	2288310874	13189217085	200	7.27424e+10	6.40374e+10	-0.248051	-0.247833
2015	601766	中国中车	7.02	12.85	35.88	7.02	1.01411	3.18892	87021604407	1539636946752	216	3.50661e+11	3.50661e+11	1.03275	1.03292
2016	601766	中国中车	12.8	9.77	11.98	8.91	-0.23969	0.74601	20357707462	205233286267	234	2.66611e+11	2.66611e+11	-0.226889	-0.228016
2017	601766	中国中车	9.75	12.11	12.17	9.72	0.23951	0.75868	21773242640	232233015972	244	3.47543e+11	3.30467e+11	0.266041	0.261003
2018	601766	中国中车	12.37	9.02	12.75	7.28	-0.25516	0.48368	13881138076	139224845382	243	2.58864e+11	2.46145e+11	-0.240083	-0.242775
2015	601788	光大证券	28.63	22.94	37.66	14.47	-0.19622	4.67901	18279495735	479037062180	242	8.96197e+10	78408920000	-0.194224	-0.193413
2016	601788	光大证券	22.72	15.99	21.16	14.97	-0.30296	1.84142	8490415103	148663612001	244	7.37265e+10	7.37265e+10	-0.276207	-0.276809
2017	601788	光大证券	15.99	13.43	16.21	13.43	-0.1601	0.76107	3509146236	53929196705	244	6.19229e+10	6.19229e+10	-0.149214	-0.147592
2018	601788	光大证券	13.45	8.77	15.21	7.79	-0.34698	0.68218	3145403574	35146898752	243	4.04366e+10	4.04366e+10	-0.334605	-0.332092
2015	601800	中国交建	14.07	13.41	23.37	10.01	-0.03456	1.73681	28092365645	464039174825	244	2.16903e+11	2.16903e+11	-0.025117	-0.022196
2016	601800	中国交建	13.45	15.19	16.85	10.31	0.13274	0.37191	6015623185	77596257339	244	2.45694e+11	2.45694e+11	0.153218	0.146935
2017	601800	中国交建	15.13	12.8	19.19	12.79	-0.15734	0.40455	6543469240	108506284123	244	207036613440	207036613440	-0.147032	-0.144542
2018	601800	中国交建	12.89	11.26	14.8	10.82	-0.12031	0.25281	4089184782	52705712033	243	1.82128e+11	1.82128e+11	-0.100773	-0.101414
2015	601808	中海油服	20.85	15.52	31.17	14.96	-0.25277	1.67503	7992575421	181226228828	244	74055107840	74055107840	-0.239853	-0.229658
2017	601808	中海油服	12.85	10.56	13.52	10.16	-0.17693	0.3809	1817510921	21505625426	244	50388011520	50388011520	-0.173304	-0.173032
2018	601808	中海油服	10.57	8.54	13.78	8.54	-0.19129	0.4605	2197311427	24210189932	243	40749395680	40749395680	-0.186474	-0.185606
2015	601818	光大银行	4.92	4.24	6.38	3.34	-0.13115	2.50431	116898918506	586366554986	234	197919362800	197919362800	-0.102239	-0.093033
2016	601818	光大银行	4.24	3.91	4.2	3.38	-0.07783	0.44222	20642470713	78643820936	243	182515261450	182515261450	-0.031107	-0.033019
2017	601818	光大银行	3.9	4.05	4.33	3.85	0.03581	0.47636	25003793472	102440508057	244	2.12581e+11	1.8905e+11	0.061503	0.06087
2018	601818	光大银行	4.05	3.7	4.99	3.45	-0.08642	0.46626	24473497150	101804758707	243	1.9421e+11	1.72713e+11	-0.040867	-0.041728
2018	601828	美凯龙	12.28	11.04	23.72	10.49	0.07918	0.97925	3476335301	60521296556	231	39192000000	1.09174e+10
2018	601838	成都银行	8.39	8.05	16.23	8.01	0.15165	1.79259	6475297684	68709043701	222	2.90786e+10	2.90786e+09
2015	601857	中国石油	10.9	8.35	14.65	8.23	-0.22757	0.26315	48162882802	570167238717	244	1.52823e+12	1.52823e+12	-0.21603	-0.212905
2016	601857	中国石油	8.34	7.95	8.31	7.08	-0.0479	0.047	8601133572	64954898133	244	1.45502e+12	1.45502e+12	-0.041854	-0.042371
2017	601857	中国石油	7.95	8.09	8.76	7.44	0.01761	0.05285	9672957401	78273364478	244	1.48064e+12	1.48064e+12	0.031518	0.031107
2018	601857	中国石油	8.09	7.21	9.35	7.21	-0.10878	0.06412	11735927290	96394595907	243	1.31958e+12	1.31958e+12	-0.092279	-0.090297
2015	601866	中远海发	4.96	7.04	11.5	3.97	0.4251	2.94506	34407503337	274980692423	152	82249200000	82249200000	0.425103	0.425101
2016	601866	中远海发	7.07	4.08	6.34	3.86	-0.42045	1.14978	13433062788	60356233312	239	47667150000	47667150000	-0.420455	-0.420455
2017	601866	中远海发	4.08	3.41	4.35	3.36	-0.16422	0.58191	6798577158	27077652258	244	39839456250	39839456250	-0.164216	-0.164216
2015	601872	招商轮船	6.3	7.09	12	5.19	0.12719	6.1874	32789856100	275990345568	244	3.75732e+10	3.34713e+10	0.128674	0.129253
2016	601872	招商轮船	7.09	4.94	6.41	4.58	-0.30324	1.7012	9015453453	47721711716	244	2.61793e+10	2.33214e+10	-0.293501	-0.293935
2016	601877	正泰电器	25.84	20	24.31	15.5	-0.22451	1.20582	2269270613	47026624159	238	37638546800	26388920200	-0.205503	-0.205118
2017	601877	正泰电器	20	26.15	30.56	17.92	0.3075	0.65226	1403298187	31774164926	244	5.62599e+10	3.79896e+10	0.328025	0.3225
2018	601877	正泰电器	26.1	24.24	30.4	20.1	-0.07304	0.93172	2004538453	49400547140	243	5.21506e+10	42109337736	-0.035979	-0.038623
2017	601878	浙商证券	12.17	16.62	23.59	12.17	0.96686	1.85815	6193845972	118070006753	130	55400001108	5540001108
2018	601878	浙商证券	16.77	7.26	18	5.75	-0.56318	1.7861	5953682338	56153585613	243	24200000484	8.77377e+09	-0.556763	-0.55716
2017	601881	中国银河	8.17	10.51	16.34	9.81	0.54332	1.21817	12348912414	165009975493	230	1.06543e+11	4.50982e+10
2018	601881	中国银河	10.5	6.82	12.56	5.82	-0.35109	0.56735	5751354960	54031613337	243	6.91361e+10	3.35511e+10	-0.340862	-0.339676
2015	601888	中国国旅	44.58	59.31	74.33	43.79	0.33581	1.63066	1591911686	92264803220	188	5.79007e+10	5.79007e+10	0.34569	0.346171
2016	601888	中国国旅	59.79	43.4	56.49	41.56	-0.26825	0.88967	868532274	39520289835	244	4.23687e+10	4.23687e+10	-0.259883	-0.259821
2017	601888	中国国旅	43	43.39	59.38	27.73	-0.00023	0.94136	1837990305	73017866249	244	8.47179e+10	8.47179e+10	1.03514	1.02258
2018	601888	中国国旅	43.75	60.2	74.19	43.05	0.38742	1.3839	2702033729	158039143570	243	1.17539e+11	1.17539e+11	0.39819	0.399401
2015	601898	中煤能源	6.95	6.05	12.91	5.91	-0.12572	1.91394	25376340241	217574434809	244	80214913570	80214913570	-0.122917	-0.122254
2016	601898	中煤能源	6.06	5.81	7.03	4.56	-0.03967	0.43421	5757081328	33015098863	244	77032834354	77032834354	-0.039669	-0.039669
2017	601898	中煤能源	5.84	5.72	6.88	5.24	-0.01549	0.3873	5135095785	31334627465	244	75839554648	75839554648	-0.009445	-0.008778
2018	601898	中煤能源	5.72	4.65	6.34	4.55	-0.18706	0.2355	3122451995	16655919017	243	61652784810	61652784810	-0.177322	-0.177448
2015	601899	紫金矿业	3.39	3.52	7.18	3.31	0.04142	3.64087	78436210487	354628709279	220	75832217648	75832217648	0.062405	0.065089
2016	601899	紫金矿业	3.52	3.34	4.05	2.71	-0.05114	1.7898	38553548200	132439885533	242	71946083791	71946083791	-0.035145	-0.034091
2017	601899	紫金矿业	3.33	4.59	4.69	3.2	0.37425	1.53626	35381922002	133483919157	244	1.05713e+11	9.8872e+10	0.396008	0.392216
2018	601899	紫金矿业	4.66	3.34	5.41	3.23	-0.27233	2.04688	47142098983	200272458610	243	7.69243e+10	7.55263e+10	-0.25419	-0.252723
2015	601901	方正证券	13.59	9.6	16.47	5.99	-0.31867	5.1341	42264456819	511052522330	241	79028173392	6.03826e+10	-0.318666	-0.318666
2016	601901	方正证券	9.58	7.6	9	6.37	-0.20833	2.416	19888728299	153883109159	244	62563970602	4.78029e+10	-0.198808	-0.198958
2017	601901	方正证券	7.59	6.89	10.13	6.86	-0.09342	0.89366	7356719867	62538421439	234	5.67192e+10	5.67192e+10	-0.093421	-0.093421
2018	601901	方正证券	6.9	5.31	7.58	4.47	-0.22932	0.51911	4273359051	26496868428	243	4.37125e+10	4.37125e+10	-0.228111	-0.227866
2015	601919	中远海控	7.22	9.02	15.62	5.74	0.25278	2.71325	27719352032	310992819638	151	9.21508e+10	9.21508e+10	0.252777	0.252778
2016	601919	中远海控	9.05	5.24	8.12	4.99	-0.41907	1.12975	11541844754	67650567058	244	5.35333e+10	5.35333e+10	-0.419069	-0.419069
2017	601919	中远海控	5.25	6.77	8.23	5.2	0.29198	0.87255	8914212826	59869511836	194	6.91642e+10	6.91642e+10	0.291984	0.291985
2018	601919	中远海控	6.83	4.04	7.25	3.41	-0.40325	0.57339	5857924822	33022138363	243	4.12737e+10	4.12737e+10	-0.403251	-0.40325
2015	601928	凤凰传媒	10.74	15.93	24.68	10.34	0.48048	4.69222	11941242871	188615285281	242	40540257000	40540257000	0.498932	0.499071
2015	601933	永辉超市	8.71	10.1	16.36	8.01	0.15959	4.21263	17135022725	194710969859	238	4.10821e+10	31023160000	0.173459	0.173364
2016	601933	永辉超市	10.03	4.91	9.43	4.02	-0.51386	0.95354	9125865817	52222373194	244	4.6991e+10	3.19586e+10	-0.010686	-0.012871
2017	601933	永辉超市	4.93	10.1	10.95	4.93	1.05703	1.68813	16156184622	120070688771	239	9.66617e+10	65739599928	1.09851	1.08147
2018	601933	永辉超市	10.17	7.87	11.57	7.02	-0.22079	1.39744	13374148593	121863888395	242	7.53195e+10	6.27105e+10	-0.208655	-0.205941
2015	601939	建设银行	6.76	5.78	7.47	4.6	-0.14116	0.2507	62677542223	401948057558	244	1.44506e+12	1.44506e+12	-0.101018	-0.096434
2016	601939	建设银行	5.77	5.44	5.73	4.53	-0.05882	0.08406	21017094196	105712121664	244	1.36006e+12	1.36006e+12	-0.004533	-0.011419
2017	601939	建设银行	5.44	7.68	7.68	5.46	0.41176	0.08161	20404573256	132614629976	244	1.92008e+12	1.92008e+12	0.47558	0.462868
2018	601939	建设银行	7.69	6.37	9.81	6.22	-0.17057	0.12202	30505957255	230671437193	243	1.59257e+12	1.59257e+12	-0.132683	-0.132682
2015	601958	金钼股份	9.39	8.28	16.86	6.52	-0.11633	3.27079	10553542660	118808477955	244	26716284432	26716284432	-0.113709	-0.11206
2016	601958	金钼股份	8.27	7.65	9.2	6.17	-0.07609	1.35738	4379726947	34928377252	244	24683523660	24683523660	-0.076087	-0.076087
2017	601958	金钼股份	7.67	7.23	10.31	6.56	-0.0549	1.48465	4790368513	40326190260	244	23328349812	23328349812	-0.054902	-0.054902
2015	601985	中国核电	4.07	9.54	13.95	4.88	1.81416	3.20721	49921573643	544793402399	139	148494202200	37120140000
2016	601985	中国核电	9.53	7.06	8.99	6.61	-0.25996	1.06436	16567262253	119184742855	244	109891935800	29943225000	-0.250471	-0.250524
2017	601985	中国核电	7.06	7.35	8.07	6.98	0.04108	0.8143	12674952060	95310538305	244	114405910500	31173187500	0.055609	0.056657
2018	601985	中国核电	7.35	5.27	7.72	5.25	-0.28299	0.3064	4769254183	30124778989	243	82029816100	82029816100	-0.26855	-0.267755
2015	601988	中国银行	4.18	4.01	5.6	3.49	-0.03373	0.86674	255159079160	1172213329226	244	1.1805e+12	1.1805e+12	0.007428	0.012048
2016	601988	中国银行	4.01	3.44	3.89	3.12	-0.14214	0.11343	33392897365	113498417640	244	1.01269e+12	1.01269e+12	-0.094637	-0.098504
2017	601988	中国银行	3.44	3.97	4.32	3.43	0.15407	0.14092	41483795358	158505845556	244	1.16872e+12	1.16872e+12	0.206755	0.202907
2018	601988	中国银行	3.98	3.61	4.76	3.45	-0.09068	0.12884	37927796782	150488191065	243	1.06274e+12	1.06274e+12	-0.045726	-0.046348
2015	601989	中国重工	9.21	9.4	19.56	8.12	0.02063	8.00246	146938481196	1828940868420	237	1.726e+11	1.68804e+11	0.023268	0.024756
2016	601989	中国重工	9.87	7.09	9.4	5.83	-0.24574	1.84132	33809678741	236010296379	229	1.30184e+11	1.27321e+11	-0.245745	-0.245745
2017	601989	中国重工	7.12	6.03	8.04	5.88	-0.14951	0.96683	18447019695	133131771354	130	1.15052e+11	1.10721e+11	-0.149506	-0.149506
2018	601989	中国重工	6	4.25	6.39	3.86	-0.29519	0.79495	18188226689	90465040640	243	9.72391e+10	7.80371e+10	-0.293281	-0.293367
2015	601991	大唐发电	6.86	5.14	9.44	4.89	-0.25291	1.6024	21327967525	153724667565	244	6.84136e+10	6.84136e+10	-0.237167	-0.234012
2016	601991	大唐发电	5.13	3.82	4.97	3.82	-0.25681	0.23269	3097084612	12755864285	234	5.08443e+10	5.08443e+10	-0.225065	-0.223735
2017	601991	大唐发电	3.83	4.15	5.17	3.77	0.08639	0.55687	7412005572	34545991549	244	5.52367e+10	5.52367e+10	0.086386	0.086387
2015	601992	金隅集团	10.6	9.37	14.28	7	-0.07594	2.11785	11306957070	123320630276	238	5.00254e+10	4.0111e+10	-0.071998	-0.071006
2016	601992	金隅集团	9.38	4.46	9.37	3.93	-0.52401	0.36935	3943884717	21964108647	236	4.76229e+10	4.22906e+10	-0.044569	-0.044824
2017	601992	金隅集团	4.43	5.43	9.08	4.17	0.21749	3.14522	33583942670	230681629175	242	5.79803e+10	5.69294e+10	0.226224	0.227803
2018	601992	金隅集团	5.45	3.5	6.2	3.09	-0.35543	1.08507	11586165039	51826613522	243	37372198969	37355230969	-0.34617	-0.346593
2017	601997	贵阳银行	15.87	13.36	18.06	13.34	-0.15336	1.77493	4079845195	64851856626	244	30709187784	1.61339e+10	-0.138934	-0.136882
2018	601997	贵阳银行	13.4	10.68	17.5	10.58	-0.2006	1.64447	3779968507	52989461872	243	24548961492	1.32321e+10	-0.17858	-0.175898
2015	601998	中信银行	8.15	7.22	10.28	5.5	-0.11302	0.87852	41103834591	318384153873	242	3.37805e+11	3.37805e+11	-0.113022	-0.113022
2016	601998	中信银行	7.22	6.41	7.19	5.38	-0.11219	0.20349	9957720402	60812917336	244	3.13672e+11	2.99907e+11	-0.080015	-0.082825
2017	601998	中信银行	6.44	6.2	7.09	5.84	-0.03276	0.1919	9390612689	60742051013	244	3.03396e+11	2.90081e+11	-0.002045	0.00078
2018	601998	中信银行	6.2	5.45	8.14	5.37	-0.12097	0.16212	7933509764	51760919605	243	2.66695e+11	2.54991e+11	-0.080928	-0.078871
2015	603000	人民网	41.8	22.81	79.96	14.94	-0.45613	4.61368	5101306405	186099741571	244	2.52208e+10	2.52208e+10	0.091385	0.092036
2018	603156	养元饮品	94.48	41.58	113.37	41.18	-0.47187	0.77859	586485778	40759924140	214	31320966600	2506026600
2017	603160	汇顶科技	102.23	96.94	129.4	84.02	-0.05645	1.09216	496122775	50193455580	244	4.40358e+10	22261689360	-0.052635	-0.05256
2018	603160	汇顶科技	98	78.7	107.11	62.93	-0.18816	0.8943	408383455	33611600275	243	3.59385e+10	1.82266e+10	-0.180994	-0.181968
2018	603259	药明康德	25.92	74.86	132.87	31.1	2.46574	1.1573	1347951589	130581772493	162	8.71925e+10	1.65196e+10
2018	603260	合盛硅业	57.31	43.8	81.29	43.61	-0.22806	1.77174	1187065592	75433592310	243	29346000000	11424871059	-0.223069	-0.220286
2017	603288	海天味业	29.46	53.8	54.66	29.6	0.8343	0.22194	599493780	24995589058	244	145324920460	145092504460	0.868869	0.857484
2018	603288	海天味业	53.91	68.8	80.94	51.47	0.27881	0.30824	832365881	56075621871	243	185785410592	185785410592	0.296199	0.29461
2017	603799	华友钴业	35.65	80.23	98.2	35.53	1.28121	7.93867	4705066319	307863658590	244	4.75504e+10	2.58109e+10	1.28121	1.28121
2018	603799	华友钴业	80.03	30.11	132.09	29.77	-0.6247	6.26489	5198274877	362877114183	241	2.49837e+10	2.46866e+10	-0.471968	-0.468353
2017	603833	欧派家居	72.12	118.05	128.02	72.12	1.35723	0.53365	224452404	24864655531	183	4.96514e+10	4900255500
2018	603833	欧派家居	119.5	79.72	151.03	69.08	-0.32469	0.38578	162135778	18267288272	243	3.3505e+10	7.34286e+09	-0.31909	-0.316222
2017	603858	步长制药	95.37	50.86	98.14	50.46	-0.46632	0.63164	430648965	32786539694	244	34676348000	1.66737e+10	-0.453452	-0.449381
2018	603858	步长制药	50.66	25.28	56.42	24.42	-0.50295	1.28783	1141455721	47172542722	243	22406675200	1.0774e+10	-0.32507	-0.3221
2015	603885	吉祥航空	16.1	34.17	78.45	16.1	2.05635	0.72187	820048853	51031474500	137	38817120000	4647120000
2018	603986	兆易创新	150	62.32	208.82	62.3	-0.61795	4.24243	1207585131	141247077794	200	1.7739e+10	1.2925e+10	-0.463987	-0.462721
2015	603993	洛阳钼业	8.75	4.46	18.66	4.46	-0.49029	1.09798	18541888500	204142889519	244	7.53169e+10	7.53169e+10	0.545428	0.549714
2016	603993	洛阳钼业	4.47	3.72	4.75	3.06	-0.16592	1.00293	16936635078	67905526879	225	6.28204e+10	6.28204e+10	-0.161234	-0.160314
2017	603993	洛阳钼业	3.72	6.88	8.54	3.75	0.84946	1.92717	41625445493	259589701591	244	1.48603e+11	1.16184e+11	0.863943	0.858871
2018	603993	洛阳钼业	6.9	3.76	9.69	3.57	-0.45349	1.66061	35867851598	238524178602	243	8.12131e+10	8.12131e+10	-0.446896	-0.442442
2015	000001	平安银行	15.99	11.99	19.8	9.46	-0.24306	2.55929	36620106027	530605132937	244	1.71561e+11	1.41531e+11	-0.083704	-0.080682
2016	000001	平安银行	12	9.1	11.53	8.57	-0.24103	0.73592	12636100958	122558527868	244	1.56251e+11	1.33144e+11	-0.075692	-0.07648
2017	000001	平安银行	9.11	13.3	15.1	8.57	0.46154	1.31513	22581345389	252181560995	244	2.28366e+11	2.25009e+11	0.482743	0.478901
2018	000001	平安银行	13.35	9.38	14.8	8.6	-0.29474	1.61112	27663556744	311258050036	243	1.61058e+11	1.61057e+11	-0.283936	-0.284511
2015	000002	万科A	14.39	24.43	24.43	11.9	0.75755	5.06903	55976109993	808008765755	235	269990888489	2.69598e+11	0.818117	0.793525
2016	000002	万科A	21.99	20.55	27.72	17.02	-0.15882	1.61481	17826139974	402752459209	123	2.26855e+11	2.26524e+11	-0.123486	-0.129349
2017	000002	万科A	20.55	31.06	33.82	18.47	0.51144	0.92692	10232393497	254109338858	239	3.42876e+11	3.42409e+11	0.562549	0.549878
2018	000002	万科A	31.45	23.82	41.13	20.59	-0.2331	1.08519	11979561967	331214528504	243	2.62953e+11	2.62738e+11	-0.202852	-0.204121
2016	000008	神州高铁	11.88	9.32	12.17	7.3	-0.20883	1.35194	3797703497	38069909374	234	2.61806e+10	1.39355e+10	-0.208829	-0.208829
2015	000009	中国宝安	13.88	17.96	23.9	9.01	0.38687	10.9724	17469251876	290356800090	212	2.85942e+10	2.67545e+10	0.389233	0.388417
2016	000009	中国宝安	17.96	10.36	16.16	10.05	-0.42316	7.29415	15677648892	191385794168	244	2.22672e+10	2.19639e+10	-0.217461	-0.217372
2015	000027	深圳能源	11.23	9.81	26.4	7.02	-0.12097	3.12652	12395059623	157255669090	244	3.88917e+10	1.41021e+10	0.330346	0.33647
2015	000039	中集集团	22	21	33.17	16.76	-0.04066	2.86058	8518303971	205798719114	243	62534213406	62516026860	-0.028142	-0.026496
2015	000046	泛海控股	10.35	12.55	21.24	9.54	0.26896	2.13405	9725526272	141897430451	233	5.71943e+10	5.70943e+10	0.279834	0.284125
2015	000060	中金岭南	9.57	14.03	29	9.16	0.4784	8.44455	18684638381	286063745869	239	3.10432e+10	2.89218e+10	0.480058	0.48156
2016	000060	中金岭南	14.01	11.15	13.97	8.64	-0.20527	5.59181	12372587554	141817995924	243	2.46708e+10	2.46577e+10	-0.204507	-0.204562
2017	000060	中金岭南	11.21	11.17	13.4	9.59	0.00179	3.63979	8661939937	101524341471	244	2.65823e+10	2.46979e+10	0.007756	0.007175
2015	000061	农产品	13.15	17.69	28	11.51	0.35038	5.46	9265425522	163292146422	244	3.00193e+10	2.84369e+10	0.353861	0.354198
2015	000063	中兴通讯	18.6	18.63	34.56	14.5	0.03156	5.32691	22110880224	501162228861	241	7.73292e+10	7.71643e+10	0.248298	0.248948
2016	000063	中兴通讯	18.58	15.95	17.54	13.18	-0.14385	1.75045	7271777881	109571731304	222	6.62602e+10	6.61129e+10	-0.129144	-0.130435
2017	000063	中兴通讯	15.99	36.36	40.15	14.64	1.27962	3.52303	14761540286	389115331376	235	1.52349e+11	1.52164e+11	1.27962	1.27962
2018	000063	中兴通讯	36.48	19.59	38.6	12.1	-0.46122	6.45068	27045587378	549101912058	204	8.21344e+10	8.20639e+10	-0.461221	-0.461221
2015	000069	华侨城A	8.56	8.8	13.85	6.84	0.06667	3.74842	27565870651	276626645688	200	6.47151e+10	27389683860	0.075783	0.075152
2016	000069	华侨城A	8.85	6.95	8.1	6.2	-0.21023	0.84525	6935820793	48804783601	244	5.70295e+10	4.25467e+10	-0.201536	-0.202273
2017	000069	华侨城A	6.98	8.49	10.08	6.78	0.22158	1.1216	9203492168	79160090146	244	6.96662e+10	5.21667e+10	0.234428	0.235971
2018	000069	华侨城A	8.5	6.35	10.79	5.21	-0.25206	1.09916	9017566818	72336436229	243	5.20959e+10	3.90157e+10	-0.216218	-0.216726
2015	000100	TCL集团	3.83	4.26	7.48	3.65	0.12105	7.95419	97266648250	529088603644	244	5.20928e+10	3.83286e+10	0.135611	0.142105
2016	000100	TCL集团	4.25	3.3	4.12	3.25	-0.22535	1.15044	14051157049	51495682437	154	4.03051e+10	2.97045e+10	-0.207697	-0.206573
2017	000100	TCL集团	3.29	3.9	5.01	3.32	0.18182	1.67452	22631091585	92412691914	169	5.27084e+10	3.51053e+10	0.208008	0.206061
2018	000100	TCL集团	3.88	2.45	4.05	2.32	-0.37179	1.40956	19099035323	61878803424	243	3.31966e+10	2.87238e+10	-0.351596	-0.346154
2015	000156	华数传媒	24.8	32.8	59.95	22.53	0.32258	1.64883	2363359266	86220376051	243	4.70139e+10	17937284668	0.322581	0.322581
2016	000156	华数传媒	33.13	17.91	29.53	16.7	-0.45396	1.57603	2259000837	45226024166	244	2.56713e+10	1.77958e+10	-0.452959	-0.452896
2015	000157	中联重科	7.16	5.35	10.38	4.88	-0.24221	5.86967	44985901098	325131782806	243	4.10031e+10	4.09419e+10	-0.236354	-0.235127
2016	000157	中联重科	5.35	4.54	5.21	4.01	-0.1514	1.40293	10752245208	48394839176	244	34795160415	3.47481e+10	-0.121522	-0.123364
2017	000157	中联重科	4.55	4.47	5.04	4.23	-0.01542	1.27185	9912837208	46022045002	244	3.48394e+10	3.4033e+10	0.016342	0.017621
2018	000157	中联重科	4.45	3.56	4.67	3.2	-0.20358	0.711	5551854768	22884470697	243	2.77984e+10	2.7327e+10	-0.163255	-0.158837
2015	000166	申万宏源	17.77	10.71	19.9	8.13	-0.28024	2.41828	35927816076	562194956722	224	1.59116e+11	3.511e+10
2016	000166	申万宏源	10.7	6.25	9.87	6.13	-0.41643	0.55304	11092021605	83153437069	236	1.25354e+11	4.49956e+10	-0.198379	-0.198179
2017	000166	申万宏源	6.29	5.37	6.53	5.19	-0.1408	0.38594	7740577850	45780819883	227	1.07704e+11	3.97917e+10	-0.125263	-0.1248
2018	000166	申万宏源	5.37	4.07	5.7	3.89	-0.24209	0.26325	5932495077	28145622991	243	9.17213e+10	8.15144e+10	-0.233191	-0.232775
2015	000333	美的集团	27.88	32.82	40.58	23.76	0.19606	1.92854	8228757695	267754786669	241	1.40038e+11	7.35331e+10	0.228416	0.232507
2016	000333	美的集团	32.82	28.17	33.84	20.35	-0.14168	1.03059	6621451808	180445126630	234	1.8099e+11	1.72202e+11	0.33809	0.32404
2017	000333	美的集团	28.65	55.43	57.87	28.2	0.9677	1.34714	8782862423	357227752984	244	3.61383e+11	3.4965e+11	1.02367	1.0032
2018	000333	美的集团	56.15	36.86	62.12	36.27	-0.33502	1.11476	7387400741	367011828913	214	2.44268e+11	2.38863e+11	-0.319402	-0.313368
2015	000338	潍柴动力	27.58	9.66	36.76	8.22	-0.64602	2.48492	9936235739	234388315278	244	3.86267e+10	2.95952e+10	-0.280072	-0.279223
2016	000338	潍柴动力	9.67	9.96	11.14	7.09	0.03106	1.44077	5761105164	51239101195	242	3.98262e+10	3.11845e+10	0.054272	0.05176
2017	000338	潍柴动力	9.96	8.34	14.32	6.63	-0.16265	1.60749	12855447320	118672970346	244	6.6697e+10	5.22248e+10	0.739275	0.72992
2018	000338	潍柴动力	8.35	7.7	9.75	7.41	-0.07674	1.63238	13054510913	110200919055	243	6.15787e+10	4.81507e+10	-0.027778	-0.02518
2015	000402	金融街	12.36	11.53	14.97	7.77	-0.06488	6.91586	20671031603	244854121464	244	3.44624e+10	3.44396e+10	-0.047424	-0.044607
2016	000402	金融街	11.5	10.3	13.7	8.22	-0.10668	3.02329	9036387747	96625276150	244	3.0786e+10	3.07657e+10	-0.069878	-0.071986
2017	000402	金融街	10.33	11.11	13.28	9.88	0.07864	1.72051	5142482182	60603169691	244	3.3207e+10	3.31899e+10	0.117232	0.117476
2018	000402	金融街	11.16	6.44	12.55	5.79	-0.42034	0.99533	2974979674	28253727158	243	1.92487e+10	1.92399e+10	-0.400648	-0.393339
2018	000408	藏格控股	17.72	11.22	19.31	10.76	-0.3661	0.54556	1087726278	16270763448	218	2.23702e+10	5.01122e+09	-0.366102	-0.366102
2015	000413	东旭光电	8.44	9.08	14.61	6.86	0.18383	6.54228	25090308074	265553124723	220	3.37319e+10	1.95143e+10	0.194318	0.196871
2016	000413	东旭光电	9.1	11.26	16.91	5.82	0.24009	5.77323	28519328323	359733839344	237	5.42018e+10	3.50538e+10	0.251509	0.247797
2017	000413	东旭光电	11.35	9.38	12.44	9.27	-0.16696	3.29396	18875193379	206279901705	199	5.25896e+10	3.90995e+10	-0.161446	-0.160746
2018	000413	东旭光电	9.39	4.5	9.7	4.21	-0.52026	2.08686	11958238515	78332900469	243	2.53533e+10	2.17903e+10	-0.514476	-0.512793
2015	000415	渤海金控	13.67	9.02	28.28	6.39	-0.34016	2.79652	9923746804	107211010602	174	3.20084e+10	2.81021e+10	0.324521	0.326993
2016	000415	渤海金控	9	7.15	8.24	6.7	-0.20732	0.38921	2407088508	18163612040	56	4.42193e+10	2.22764e+10	-0.207317	-0.207317
2017	000415	渤海金控	7.16	5.76	7.89	5.51	-0.19441	0.80536	4980772588	34366506146	244	3.56228e+10	1.79458e+10	-0.188543	-0.187413
2018	000415	渤海金控	5.78	3.6	6.05	3.42	-0.375	0.49658	3071130223	12567963718	124	2.22643e+10	1.27704e+10	-0.366218	-0.364583
2015	000423	东阿阿胶	37.28	52.3	61.8	36.7	0.4029	6.52924	4270262334	205653440098	244	3.42053e+10	3.41972e+10	0.425583	0.424356
2016	000423	东阿阿胶	52.26	53.87	62.1	42.85	0.03002	3.15747	2065052984	108811177713	244	3.52321e+10	3.52238e+10	0.044767	0.045315
2017	000423	东阿阿胶	53.87	60.27	72.95	51.85	0.1188	2.75281	1800399482	115205927542	244	3.94179e+10	3.94086e+10	0.13413	0.135511
2018	000423	东阿阿胶	60.27	39.55	68.06	38.25	-0.34379	1.65046	1079439336	59216070156	243	2.58666e+10	2.58605e+10	-0.331483	-0.328853
2015	000425	徐工机械	15	4.25	17.83	4.08	-0.7161	4.10194	29059317096	273303562766	237	3.01082e+10	3.00454e+10	-0.145261	-0.144289
2016	000425	徐工机械	4.26	3.38	4	2.84	-0.20471	2.01983	14154386282	47509642475	234	2.36861e+10	2.36383e+10	-0.204706	-0.204706
2017	000425	徐工机械	3.37	4.63	4.63	3.24	0.36982	2.62814	18417298736	71826213736	244	3.24458e+10	3.23802e+10	0.375726	0.37426
2018	000425	徐工机械	4.65	3.23	4.88	3.21	-0.30238	2.23744	17527380963	73577958947	243	2.53027e+10	2.25892e+10	-0.295417	-0.293737
2015	000503	海虹控股	31.29	33.49	78.19	20.05	0.07065	7.40524	6655998036	240935966722	191	3.01016e+10	3.00729e+10	0.070652	0.070652
2016	000503	海虹控股	33.9	42.05	58.82	18.99	0.2556	4.60244	4136778052	147134855012	227	3.77955e+10	3.77955e+10	0.255599	0.255599
2017	000503	海虹控股	42.26	43.16	48.46	24.93	0.0264	1.40765	1265227468	47961356056	104	3.87932e+10	3.87932e+10	0.026397	0.026397
2015	000538	云南白药	63.17	72.62	88.7	59.36	0.14996	2.24774	2340798835	166977600291	244	7.56264e+10	7.56259e+10	0.157821	0.157878
2016	000538	云南白药	72.69	76.15	76.15	55	0.04861	0.47298	492563193	30749634675	133	7.93026e+10	7.9302e+10	0.058713	0.056871
2017	000538	云南白药	78.88	101.79	106.68	71.45	0.3367	1.09226	1137480987	101140391164	242	1.06004e+11	1.06003e+11	0.348733	0.347209
2018	000538	云南白药	102.41	73.96	118.45	70.23	-0.27341	0.78139	813739811	76461696121	202	7.70219e+10	7.70214e+10	-0.262581	-0.25867
2015	000540	中天金融	12.05	9.12	35.78	7.24	-0.22581	4.70613	20322990481	276152360297	201	3.93839e+10	3.57525e+10	0.946442	0.952462
2016	000540	中天金融	9.11	6.93	8.34	6.12	-0.24013	1.77809	8337414419	58048050690	216	3.24947e+10	2.71984e+10	-0.218319	-0.218224
2017	000540	中天金融	7	7.35	8.46	6.19	0.06061	1.38104	6490565428	47273901050	154	3.45278e+10	3.17841e+10	0.092345	0.089452
2018	000553	安道麦A	15.92	9.13	17.9	9.13	-0.42397	0.51446	1258642103	18159483793	243	2.17355e+10	4.24616e+09	-0.421366	-0.42
2016	000555	神州信息	42.19	21.23	40.51	21.09	-0.49572	2.97874	2869814736	87699158496	186	2.04536e+10	5.47889e+09	-0.495038	-0.494774
2015	000559	万向钱潮	12	22.63	31	11.65	0.90649	9.15444	21003019773	408842758758	244	5.192e+10	5.18204e+10	1.32536	1.31306
2016	000559	万向钱潮	22.28	13.26	20.37	13.13	-0.41405	2.97527	6826168675	106671434836	244	3.04224e+10	3.0364e+10	-0.404675	-0.403005
2017	000559	万向钱潮	13.26	10.15	13.52	8.96	-0.23454	1.49247	4109011254	45732089971	239	2.79446e+10	2.78909e+10	-0.073092	-0.073906
2015	000568	泸州老窖	20.5	27.12	33.95	18.21	0.32941	5.02316	7043734742	175320299069	244	3.80291e+10	3.80161e+10	0.375651	0.368627
2016	000568	泸州老窖	27	33	35.4	19.82	0.21681	1.91278	2682197058	76408813708	226	46274331708	46258474713	0.248064	0.246313
2017	000568	泸州老窖	33.15	66	70.63	32.75	1	1.72876	2532205001	130774670566	244	96673663416	92548663416	1.03918	1.02909
2018	000568	泸州老窖	66.5	40.66	73.37	35.6	-0.38394	1.68901	2473980612	132544028003	243	5.95568e+10	5.93679e+10	-0.370825	-0.365
2015	000623	吉林敖东	35.19	30.95	46.08	22.07	-0.11089	8.93593	7992642285	266074843635	244	2.76829e+10	2.49745e+10	-0.106646	-0.105142
2016	000623	吉林敖东	30.83	30.99	37.2	22.33	0.00129	4.71465	4216963051	116651304230	243	2.77186e+10	2.49472e+10	0.013746	0.010985
2017	000623	吉林敖东	30.91	22.5	31.24	21.69	-0.27396	2.50167	2908861367	73790180922	244	26162324145	24644312055	-0.04645	-0.046467
2015	000625	长安汽车	16.4	16.97	25.85	11.42	0.03287	2.9426	13720987569	257492205096	212	7.67447e+10	7.04085e+10	0.046287	0.048083
2016	000625	长安汽车	16.93	14.94	16.77	13.47	-0.11962	1.36803	6570164705	101194990430	224	67223946884	6.51356e+10	-0.077794	-0.081909
2017	000625	长安汽车	14.99	12.6	16.41	12.46	-0.15663	1.38539	6653548743	97209443392	244	5.56326e+10	5.38713e+10	-0.117278	-0.113655
2018	000625	长安汽车	12.61	6.59	13.35	5.68	-0.47698	0.70199	3371394040	31457251508	243	2.84636e+10	2.75424e+10	-0.448812	-0.441587
2016	000627	天茂集团	10.99	7.65	9.86	6.96	-0.28903	1.12444	4789212413	39683625820	228	3.25828e+10	1.03549e+10	-0.288197	-0.288151
2017	000627	天茂集团	7.68	8	10.93	6.79	0.04575	1.52738	7546229967	68675183027	244	39525033320	10828659976	0.049318	0.04902
2018	000627	天茂集团	8.02	5.61	8.71	5.02	-0.29875	0.55296	2731982355	19476841912	243	2.77169e+10	1.14164e+10	-0.294026	-0.29375
2018	000629	攀钢钒钛	3.7	3	4.43	2.81	-0.0228	2.01506	17308811232	64126016510	85	25769238606	14301417075	-0.022801	-0.022801
2015	000630	铜陵有色	15.39	3.58	17.03	3.58	-0.76873	2.32287	22208134208	103530137534	90	3.42271e+10	3.42264e+10	-0.183675	1.86499
2016	000630	铜陵有色	3.57	3.08	3.48	2.41	-0.13966	4.15168	39692703905	115642852534	244	2.94468e+10	2.94462e+10	-0.139665	-0.139665
2017	000630	铜陵有色	3.1	2.92	3.56	2.61	-0.05195	2.80249	29500490531	91287100153	244	3.07375e+10	2.79165e+10	-0.051948	-0.051948
2018	000630	铜陵有色	2.93	1.97	2.97	1.96	-0.32534	1.01515	10686035166	26410695961	243	2.07373e+10	1.88343e+10	-0.31979	-0.318493
2015	000651	格力电器	37.9	22.35	65.05	15.75	-0.3979	3.46935	20870687704	664303261438	244	1.34452e+11	1.33477e+11	0.276511	0.285022
2016	000651	格力电器	22.36	24.62	30.59	18.31	0.10157	1.64755	9911214440	238893659666	94	1.48107e+11	1.4703e+11	0.186345	0.16868
2017	000651	格力电器	24.7	43.7	47.8	23.79	0.77498	2.81461	16931934598	610721205252	243	2.62887e+11	2.6091e+11	0.856359	0.848091
2018	000651	格力电器	44.2	35.69	57.4	35.68	-0.1833	2.31859	13947989136	633620785306	243	2.14701e+11	2.13095e+11	-0.183295	-0.183295
2018	000661	长春高新	182.77	175	255.3	153.17	-0.04372	3.5026	595835498	116985641538	243	29769646375	29751373050	-0.039903	-0.039344
2016	000671	阳光城	8.93	5.57	8.13	5.57	-0.38317	1.58156	6402532080	40524291957	239	2.25487e+10	1.73327e+10	-0.377654	-0.377298
2017	000671	阳光城	5.58	7.87	8.28	5.26	0.41293	1.63094	6605433242	42753487667	233	3.18741e+10	2.55426e+10	0.425213	0.421903
2018	000671	阳光城	8.09	5.19	10.33	4.87	-0.34053	2.02952	8219709689	61259315118	243	2.10199e+10	1.68227e+10	-0.33478	-0.33418
2015	000686	东北证券	20.06	17.5	26.69	9.9	-0.12412	9.52205	18636232495	351027655659	243	34250405560	30604943320	-0.121975	-0.121121
2016	000686	东北证券	17.38	12.36	15.76	11.28	-0.29371	4.40921	10319550865	135512450618	238	2.8928e+10	2.58383e+10	-0.240377	-0.220896
2018	000703	恒逸石化	21.48	11.52	26.26	11.29	-0.46592	1.27554	3352060360	54363651170	180	3.02741e+10	2.61918e+10	-0.24616	-0.243023
2015	000709	河钢股份	3.83	3.33	7	3.07	-0.13055	5.44114	57777281154	269667282372	205	3.536e+10	3.53543e+10	-0.130548	-0.130548
2016	000709	河钢股份	3.31	3.34	3.71	2.65	0.003	2.87368	30514514421	97080051253	244	3.54662e+10	3.54604e+10	0.013378	0.012012
2017	000709	河钢股份	3.33	3.9	6.15	3.33	0.16766	5.17736	54976340811	260238841247	244	4.14126e+10	4.14059e+10	0.189089	0.191617
2018	000709	河钢股份	3.9	2.84	4.16	2.77	-0.27179	1.23045	13065670222	44399620814	243	3.01568e+10	3.0152e+10	-0.247194	-0.246154
2015	000712	锦龙股份	27.3	29.12	52.2	21.85	0.07059	7.53237	6749001333	245660849563	174	26091520000	24650080000	0.075062	0.074265
2016	000718	苏宁环球	11.78	8.63	11.78	8.36	-0.34572	0.91022	2762182807	26096488302	108	2.61889e+10	1.64864e+10	-0.340163	-0.338135
2017	000723	美锦能源	15.2	6.89	15.58	6.89	-0.54431	0.69693	2861527244	26028183964	181	2.82899e+10	7.44977e+09	-0.173972	-0.173148
2018	000723	美锦能源	6.9	3.21	6.88	3.12	-0.53411	1.14084	4667600056	20178437477	158	1.31333e+10	3.47079e+09	-0.50906	-0.50508
2015	000725	京东方A	3.38	2.97	5.74	2.79	-0.11607	6.37035	223937275129	936196150531	240	1.03151e+11	7.16763e+10	-0.113125	-0.113095
2016	000725	京东方A	2.97	2.86	2.97	2.22	-0.03704	2.03161	71417189841	182442889851	244	9.94977e+10	7.11195e+10	-0.03287	-0.03367
2017	000725	京东方A	2.86	5.79	6.67	3.08	1.02448	4.60105	160109009292	768937653147	244	1.99952e+11	1.99941e+11	1.03962	1.03496
2018	000725	京东方A	5.83	2.63	6.65	2.58	-0.54577	3.72074	129475930829	582128132959	243	9.09197e+10	9.0913e+10	-0.539205	-0.537133
2015	000728	国元证券	31.4	22.59	39.84	14.95	-0.27526	7.8696	15456674158	458909300039	240	44369019000	44369019000	-0.273267	-0.272056
2016	000728	国元证券	22.55	19.9	25.61	14.93	-0.11908	4.54971	8936082589	177482285441	224	39085590000	3.84973e+10	-0.101924	-0.101372
2017	000728	国元证券	20.01	11	21.81	10.69	-0.44724	2.69967	9085592745	138818031807	244	37019917517	32407650000	-0.155342	-0.155779
2018	000728	国元证券	11.05	6.98	11.74	5.57	-0.36545	1.47199	4953899892	41346464574	243	2.34908e+10	20563947614	-0.352011	-0.351818
2015	000729	燕京啤酒	8.06	8.23	12.78	6.83	0.03004	3.14035	8851204561	85387052748	244	2.31966e+10	2.06519e+10	0.036715	0.04005
2015	000738	航发控制	16.57	31.62	45	16.74	0.91289	7.32589	8392847829	250378597156	240	3.62252e+10	3.62252e+10	0.914146	0.913914
2016	000738	航发控制	32.58	24.74	35.41	22.48	-0.21758	3.94856	4523633400	129980275184	244	2.83432e+10	2.83432e+10	-0.217026	-0.216951
2015	000750	国海证券	17.5	12.85	23.09	8.21	-0.26107	7.10419	19965333763	320510576708	244	3.61131e+10	2.96881e+10	-0.255276	-0.252444
2016	000750	国海证券	12.84	6.97	12.23	6.77	-0.45759	3.43711	14489276674	125623398069	225	2.93823e+10	2.93823e+10	-0.179301	-0.178599
2015	000768	中航飞机	18.76	24.77	48.5	18.11	0.30781	6.2324	17255305194	519818254390	239	6.85793e+10	6.57351e+10	0.310859	0.313094
2016	000768	中航飞机	25.31	21.26	25	16.16	-0.1417	2.34899	6503520449	135700815065	244	5.88614e+10	5.8861e+10	-0.136785	-0.137667
2017	000768	中航飞机	21.38	16.89	26	16.68	-0.20555	2.10811	5836609583	121662870426	244	4.67624e+10	4.67621e+10	-0.203374	-0.203198
2018	000768	中航飞机	16.89	13.24	19.47	12.82	-0.2161	1.72122	4765445238	76978178904	243	3.66569e+10	3.66566e+10	-0.211328	-0.211072
2015	000776	广发证券	26.17	19.45	30.88	11.97	-0.25048	3.26375	24873286851	566061645309	244	1.4823e+11	1.4823e+11	-0.244973	-0.242775
2016	000776	广发证券	19.3	16.86	19.79	12.8	-0.13316	1.67767	12785653482	211622313934	244	1.28492e+11	1.28492e+11	-0.091736	-0.092031
2017	000776	广发证券	16.88	16.68	19.38	15.59	-0.01068	1.03804	7910976700	139759281805	244	1.2712e+11	1.2712e+11	0.009971	0.010083
2018	000776	广发证券	16.72	12.68	20.16	10.95	-0.23981	0.89797	6843525456	104053647357	243	9.66354e+10	9.66354e+10	-0.216182	-0.215827
2015	000778	新兴铸管	6.2	6.49	12.96	5.17	0.05016	6.7186	24477929791	182811270460	181	2.36451e+10	2.36426e+10	0.053773	0.056634
2015	000783	长江证券	16.9	12.42	19.25	7.83	-0.26159	7.23055	34290634228	492350769747	231	5.89014e+10	5.89002e+10	-0.254765	-0.252675
2016	000783	长江证券	12.4	10.23	12.77	8.33	-0.17633	2.1622	11955795049	128451487616	244	5.65665e+10	4.85147e+10	-0.145562	-0.148148
2017	000783	长江证券	10.24	7.87	10.61	7.8	-0.23069	0.97782	5406797683	51885810139	244	4.35169e+10	4.35163e+10	-0.218312	-0.216031
2018	000783	长江证券	7.86	5.15	8.58	4.13	-0.34562	0.93965	5195792209	31621014452	243	2.84768e+10	2.84764e+10	-0.326812	-0.326557
2018	000786	北新建材	22.5	13.76	26.73	13.38	-0.38844	2.61344	4415420321	93604771029	243	2.32476e+10	1.94564e+10	-0.378486	-0.372667
2015	000792	盐湖股份	21.77	25.68	34.04	16.36	0.18341	2.95453	5487721987	139854544656	239	4.76979e+10	4.02246e+10	0.186616	0.187373
2016	000792	盐湖股份	25.7	19.07	23.11	16.27	-0.2574	2.11433	3927147109	76336651037	244	3.54205e+10	2.98708e+10	-0.256341	-0.256192
2017	000792	盐湖股份	19.36	13.91	20.02	9.55	-0.27058	3.29431	9178241006	140646118824	239	3.87545e+10	3.8251e+10	0.095616	0.095176
2015	000793	华闻传媒	11.36	15.03	20.8	9.54	0.33009	7.40069	15180512418	213164582059	160	3.083e+10	2.54986e+10	0.333648	0.334513
2016	000793	华闻传媒	14.98	11.29	13.53	7.95	-0.24884	5.62239	11342409711	115787869560	244	2.27761e+10	2.06324e+10	-0.245435	-0.245842
2015	000800	一汽轿车	15.14	16.37	29	13.34	0.08124	5.85962	9536535554	188582394544	241	26642175000	2.31104e+10	0.081957	0.081902
2015	000825	太钢不锈	5.27	4.1	9.1	3.82	-0.22201	4.05411	23093219867	144737850481	244	2.33546e+10	2.33539e+10	-0.222011	-0.222011
2015	000826	启迪桑德	27.46	39.62	54.57	24.43	0.44863	4.20875	3562859429	130955922990	222	3.35398e+10	3.33501e+10	0.451311	0.452285
2016	000826	启迪桑德	39.62	32.98	36.79	27.14	-0.16759	1.4686	1254619068	40156209125	227	2.81747e+10	2.79364e+10	-0.163486	-0.163806
2017	000826	启迪桑德	33	33.02	38.43	31.96	0.00121	1.65005	1686092196	59208682389	244	3.37412e+10	2.79573e+10	0.007262	0.007277
2015	000839	中信国安	11.27	20.35	28.57	10.4	0.81373	4.9719	7795593111	146257148787	121	3.19074e+10	3.19007e+10	0.82924	0.831551
2016	000839	中信国安	19.97	9.18	27.8	8.57	-0.54889	7.29672	28601874294	408050574575	244	3.5984e+10	3.59765e+10	0.132502	0.132678
2017	000839	中信国安	9.22	9.59	13.76	8.12	0.04466	7.18824	28176640855	300408015386	244	3.75911e+10	3.75833e+10	0.050053	0.050109
2015	000858	五粮液	21.59	27.28	32.86	20.33	0.26884	3.07733	11681444442	301971063572	184	1.03554e+11	1.03546e+11	0.295823	0.296744
2016	000858	五粮液	27.38	34.48	38.07	22.46	0.26393	1.65393	6278254734	198301743884	244	1.30885e+11	1.30878e+11	0.293119	0.293255
2017	000858	五粮液	34.48	79.88	82.15	34.66	1.31671	1.67185	6346299742	344810564928	244	3.03222e+11	3.03205e+11	1.36382	1.34281
2018	000858	五粮液	80.2	50.88	91.75	47.49	-0.36304	1.81563	7047573448	491836952714	243	1.97496e+11	1.93129e+11	-0.351319	-0.34677
2015	000876	新希望	14.15	18.99	26.18	13.77	0.35643	3.74252	7799852667	158018635781	152	3.95774e+10	3.28206e+10	0.374238	0.374286
2016	000876	新希望	17.09	8.05	18.08	7.99	-0.57609	1.1821	4927263723	58475774929	201	3.35543e+10	2.78254e+10	-0.124364	-0.123223
2017	000876	新希望	8.07	7.45	8.39	7.34	-0.07453	1.10855	4673659039	36946522816	244	3.14093e+10	3.1036e+10	-0.017477	-0.012422
2018	000876	新希望	7.47	7.28	8.48	5.67	-0.02282	0.95804	4039123843	29378877130	243	3.06926e+10	3.03971e+10	-0.000373	-0.002685
2015	000883	湖北能源	7.07	6.14	13.63	5.03	-0.0451	2.65825	17298412705	155328637609	161	3.99557e+10	3.28241e+10	-0.037373	-0.032768
2015	000895	双汇发展	31.58	20.41	40.72	15.4	-0.35309	1.74788	5769532518	149219649241	244	6.73707e+10	3.70934e+10	0.006205	0.015372
2016	000895	双汇发展	20.33	20.93	24.95	16.51	0.02548	0.74847	2469612831	53931921825	244	6.90598e+10	6.90486e+10	0.130706	0.130818
2017	000895	双汇发展	20.98	26.5	28	19.7	0.26613	0.9507	3136895090	73737532674	244	87438294526	87424125241	0.34097	0.323459
2018	000895	双汇发展	26.73	23.59	29.66	21.48	-0.10981	0.81226	2680089267	68808918424	243	7.78366e+10	7.78239e+10	-0.033634	-0.03434
2015	000898	鞍钢股份	6.13	4.77	8.51	4.51	-0.22439	2.15358	15580741224	101219783901	244	3.451e+10	3.45098e+10	-0.21961	-0.217073
2016	000898	鞍钢股份	4.82	5.04	6.01	3.68	0.0566	0.87965	6364084132	29537072814	243	3.64634e+10	3.64633e+10	0.056604	0.056604
2017	000898	鞍钢股份	5.05	6.35	8.07	4.89	0.25992	1.34172	9707086813	62018345548	244	4.5941e+10	4.59409e+10	0.274834	0.273214
2018	000898	鞍钢股份	6.35	5.13	7.96	5	-0.19213	1.06601	7712357995	49544351581	243	3.71146e+10	3.71145e+10	-0.158477	-0.155591
2015	000917	电广传媒	16.94	26.56	42.89	16.3	0.57346	5.92683	8401608850	222050490350	131	3.76503e+10	2.82056e+10	0.575907	0.577014
2016	000917	电广传媒	26.6	14.39	23.9	13.94	-0.45821	5.77959	8192894936	137662905306	199	2.03986e+10	1.52835e+10	-0.456869	-0.456702
2016	000938	紫光股份	98.5	57.39	88.54	53	-0.41665	1.05937	1104186425	70149579350	244	5.98178e+10	1.18266e+10	-0.416455	-0.416446
2017	000938	紫光股份	57.64	72.03	76.1	49.53	0.2551	0.82845	863494141	53490093689	214	7.50771e+10	1.48434e+10	0.257225	0.256839
2018	000938	紫光股份	72.4	31.26	80.79	31.26	-0.56601	0.88778	1295477078	72685066506	238	4.56154e+10	9018885120	-0.390354	-0.389643
2017	000959	首钢股份	6.59	5.98	9.49	5.78	-0.09668	0.74017	3915038817	29102037035	244	31630549808	1.77398e+10	-0.096677	-0.096677
2017	000961	中南建设	10.44	6.41	10.71	5.98	-0.38365	1.80214	6685553879	52673073201	244	2.37797e+10	2.28778e+10	-0.382255	-0.382212
2018	000961	中南建设	6.64	5.61	7.99	5.02	-0.1248	1.70824	6337227742	43157322161	241	2.08119e+10	2.07561e+10	-0.121777	-0.121685
2015	000963	华东医药	52.61	81.96	87.66	50.79	0.55788	2.11983	920135007	64278282683	216	3.55756e+10	3.55756e+10	0.579392	0.575366
2016	000963	华东医药	81.9	72.07	77.08	61.35	-0.12067	1.16414	565839690	39249625946	244	3.50302e+10	3.12827e+10	-0.103495	-0.105417
2017	000963	华东医药	72.07	53.88	96.17	43.93	-0.25239	1.03903	1010060700	58118477611	244	5.23776e+10	4.67743e+10	0.517651	0.513945
2018	000963	华东医药	53.87	26.46	77.46	25.94	-0.50891	1.32748	1935700744	90731967346	243	3.85833e+10	3.44557e+10	-0.256028	-0.25
2016	000977	浪潮信息	31.71	21.2	28.54	19.4	-0.33144	5.0108	5007209787	119958574744	243	2.11848e+10	2.03462e+10	-0.329867	-0.329864
2015	000983	西山煤电	8.28	6.08	11.66	5.1	-0.26034	5.02762	15843049064	129195219882	244	19159296000	1.91591e+10	-0.260065	-0.259976
2016	000983	西山煤电	6.03	8.46	11.43	5.68	0.39145	5.53247	17433930413	148605903522	244	26659152000	2.66591e+10	0.391727	0.391776
2017	000983	西山煤电	8.47	10.14	12.1	7.22	0.19858	3.70507	11675431017	114490685738	244	31953168000	3.19531e+10	0.200179	0.199882
2015	000999	华润三九	22.6	27.3	39.93	22.58	0.20477	2.7969	2737881847	78113113855	244	26723970000	2.66924e+10	0.223059	0.222771
2015	001979	招商蛇口	23.9	20.86	23.18	20.86	-0.17549	0.10742	795064266	17527207731	2	1.54401e+11	3.68424e+10
2016	001979	招商蛇口	20.2	16.39	20.06	13.7	-0.21429	1.4251	11264144659	180600341198	244	1.29548e+11	2.89439e+10	-0.199652	-0.201822
2017	001979	招商蛇口	16.42	19.56	22.08	15.95	0.19341	0.86131	6807862219	130804264665	244	1.54604e+11	37157152533	0.222603	0.223917
2018	001979	招商蛇口	19.52	17.35	27.38	16.1	-0.11299	0.93751	7410165471	154665692772	243	1.37136e+11	3.29589e+10	-0.088609	-0.081288
2017	002001	新和成	19.6	38.06	41.16	17.44	0.94184	2.42123	3060236401	80741416018	244	48104757140	4.08399e+10	1.007	0.972449
2018	002001	新和成	37.8	15.01	44.76	13.4	-0.60562	2.47507	5318083668	130065459190	243	32251421123	3.18434e+10	-0.315409	-0.311167
2015	002007	华兰生物	33.31	44	66.79	32.99	0.32132	4.56875	2655834581	122856805951	241	25577411200	22051381264	0.334601	0.339339
2016	002007	华兰生物	43.8	35.75	51.29	29.14	-0.1875	2.40043	2232608422	87911445842	244	33250634560	2.87645e+10	0.310555	0.309091
2017	002007	华兰生物	35.75	26.88	37.3	26.61	-0.24811	2.08545	1939649322	61611056146	244	2.50008e+10	2.15953e+10	-0.239868	-0.236923
2018	002007	华兰生物	26.88	32.8	40.36	24.93	0.22024	3.19158	2968445335	100126487681	243	30506875904	26323724296	0.231877	0.231399
2015	002008	大族激光	15.98	25.89	39.61	16.09	0.62116	10.2876	10940200055	270657294147	238	2.75323e+10	2.5573e+10	0.631644	0.633688
2016	002008	大族激光	25.9	22.6	24.41	18.21	-0.12708	3.76356	4013283047	89651118977	244	24099598027	2.23798e+10	-0.118787	-0.119351
2017	002008	大族激光	22.6	49.4	59.32	21.44	1.18584	4.27049	4556887666	173753226945	244	52713023103	4.90139e+10	1.19933	1.19469
2018	002008	大族激光	49.54	30.36	59.9	29.85	-0.38543	3.59919	3840579664	177105398973	243	3.23961e+10	3.0157e+10	-0.383175	-0.381377
2015	002024	苏宁易购	9.04	13.45	22.8	8.83	0.49444	9.51938	70282021144	1065428306687	236	9.93019e+10	6.74896e+10	0.498373	0.5
2016	002024	苏宁易购	13.56	11.45	12.7	10.25	-0.1487	1.72369	16047632844	182199510778	244	1.066e+11	5.7454e+10	-0.144098	-0.144238
2017	002024	苏宁易购	11.72	12.29	14.72	10.1	0.07336	1.24495	11590522924	140778180415	242	1.1442e+11	6.12849e+10	0.08047	0.079476
2018	002024	苏宁易购	12.3	9.85	16.27	9.85	-0.19854	1.33055	12387484995	162994087117	243	9.17039e+10	5.74864e+10	-0.192165	-0.190399
2016	002027	分众传媒	42.06	14.27	38.3	13.85	-0.66463	0.29445	2572584672	63099159263	244	124674614045	5.05625e+10	-0.324182	-0.323384
2017	002027	分众传媒	14.16	14.08	14.99	8.54	-0.01331	0.82869	10136222744	120035214148	244	172220461952	8.17177e+10	0.42488	0.409951
2018	002027	分众传媒	14.11	5.24	15.18	5.24	-0.62784	1.51965	22305251231	211105153983	243	7.69121e+10	3.6496e+10	-0.549521	-0.546307
2018	002032	苏泊尔	40.17	52.5	57.22	38.07	0.30015	0.53666	440728235	21254701483	242	43115307900	28572418035	0.331733	0.329371
2017	002044	美年健康	13.13	21.87	22.82	12.01	0.65933	0.69512	1808223863	30438306279	239	5.68906e+10	2.32211e+10	0.661038	0.66047
2018	002044	美年健康	21.28	14.95	30.3	13.2	-0.31642	0.94409	2947051398	58207720852	243	4.66674e+10	3.50512e+10	-0.17817	-0.177412
2016	002049	紫光国微	54.14	32.94	54.14	30.69	-0.45237	3.43414	2083897987	84003540243	200	1.99886e+10	1.96474e+10	-0.451647	-0.451438
2018	002050	三花智控	18.38	12.69	21.04	10.69	-0.30807	1.64248	3499554795	57986962351	243	2.70379e+10	2.36129e+10	-0.296142	-0.294438
2015	002065	东华软件	17.88	25.1	46.2	16.34	0.40145	6.37459	9973431925	278378595123	226	39270498670	3.38522e+10	0.406886	0.409827
2016	002065	东华软件	22.59	23.3	25.28	19.73	-0.07171	1.33627	2097802569	46363458085	123	36578525074	3.18845e+10	-0.065195	-0.065737
2017	002065	东华软件	23.59	8.2	23.24	8.2	-0.64807	1.39926	4393391420	60033639358	244	25746257992	2.29193e+10	-0.290805	-0.2897
2018	002065	东华软件	8.22	6.95	10.3	6.25	-0.15244	3.16807	9870078647	85454947471	233	2.16526e+10	1.95129e+10	-0.142618	-0.140244
2016	002074	国轩高科	36.67	30.99	43.4	22.99	-0.16469	4.04029	3539662269	127232230021	234	2.71501e+10	1.45037e+10	-0.161715	-0.160647
2017	002074	国轩高科	31.01	22.26	35.99	21.23	-0.2817	2.33873	2658314087	83035688852	238	2.53018e+10	1.40705e+10	-0.17633	-0.172169
2015	002081	金螳螂	17	18.68	37.12	12.25	0.1119	3.90441	6880375564	150236679976	216	3.2918e+10	3.13366e+10	0.115022	0.117857
2016	002081	金螳螂	18.81	9.79	17.57	9.64	-0.47591	2.38107	6293901945	77470866495	244	2.5878e+10	2.46557e+10	-0.203599	-0.203158
2017	002081	金螳螂	9.8	15.32	16.33	9.65	0.56486	1.6945	4479086779	54391495768	244	4.04955e+10	3.89795e+10	0.587476	0.580184
2018	002081	金螳螂	15.47	8.1	16.56	7.35	-0.47128	1.20834	3194019129	38243740658	243	2.14108e+10	2.08246e+10	-0.464604	-0.461488
2017	002085	万丰奥威	19.7	17.9	22.45	15.05	-0.09413	0.47832	1046019245	19241869144	244	3.91451e+10	3.78358e+10	0.092511	0.092105
2018	002120	韵达股份	45.92	30.3	60.39	28.43	-0.33814	0.21587	369737544	14871059721	243	5.18968e+10	9.46484e+09	-0.134779	-0.134382
2015	002129	中环股份	21.15	12.22	53	9.28	-0.41948	3.83289	10135060958	179774038600	215	3.23126e+10	2.80603e+10	0.277388	0.277625
2016	002131	利欧股份	19.31	15.95	20.9	14.16	-0.18205	1.99179	3200203897	56343616449	232	2.56268e+10	1.25472e+10	-0.180627	-0.180513
2015	002142	宁波银行	15.76	15.51	23.88	9.81	-0.01399	4.40198	17166802149	290171224106	244	6.04858e+10	5.35135e+10	0.211334	0.211825
2016	002142	宁波银行	15.5	16.64	18.32	11.73	0.07286	1.43161	5582992828	84709959298	243	6.48926e+10	5.7449e+10	0.104722	0.10187
2017	002142	宁波银行	16.78	17.81	20.02	15.04	0.07031	1.02419	5192379058	89371389138	244	9.02919e+10	8.01221e+10	0.416067	0.41244
2018	002142	宁波银行	17.81	16.22	21.62	15.53	-0.08928	0.92274	4806155387	86299983509	243	8.44828e+10	7.51087e+10	-0.066872	-0.066816
2015	002146	荣盛发展	16.23	9.53	27.66	7.34	-0.3995	2.68251	11664010664	161657691830	221	4.1438e+10	3.20411e+10	0.210017	0.213611
2016	002146	荣盛发展	9.53	7.85	9.29	6.44	-0.17629	1.22985	5347574890	41242710422	244	3.41331e+10	2.64149e+10	-0.14555	-0.150052
2017	002146	荣盛发展	7.88	9.53	14.2	7.67	0.21401	2.93421	12758440928	138914906844	244	4.1438e+10	3.7075e+10	0.262379	0.264968
2018	002146	荣盛发展	9.75	7.95	13.88	6.7	-0.16579	2.48341	10798256813	111082133249	243	3.45679e+10	3.09388e+10	-0.120642	-0.121721
2016	002152	广电运通	30.82	13.28	27.91	13.28	-0.57147	1.04726	1695778507	31862145702	235	21503734952	1.70863e+10	-0.3516	-0.350758
2015	002153	石基信息	65.33	151	217.6	63	1.30183	2.11254	751211087	86399737675	244	53695033901	24621086805	1.30377	1.30366
2016	002153	石基信息	149.38	24.37	135.9	23.31	-0.83861	1.31092	1398478869	53807847958	244	2.59976e+10	1.19208e+10	-0.515064	-0.515033
2017	002153	石基信息	24.3	26.66	30.15	20.38	0.09397	1.28136	1366943397	34071364332	234	2.84406e+10	1.29158e+10	0.096109	0.095609
2018	002153	石基信息	26.82	25.96	39.1	23.45	-0.02626	2.25625	2406945380	71559503340	243	2.76968e+10	1.25796e+10	-0.023064	-0.022506
2016	002174	游族网络	80.58	26.45	146.54	25.12	-0.70457	2.24791	1936154812	80379802615	219	2.27818e+10	7.39842e+09	-0.112495	-0.111694
2018	002179	中航光电	39	33.68	45.38	32.71	-0.14474	1.60751	1271441977	50379848200	243	2.66389e+10	2.63536e+10	-0.142217	-0.141696
2016	002183	怡亚通	46.08	10.86	41.45	10.86	-0.76422	4.43593	9312888897	172997482597	244	2.27997e+10	2.27855e+10	-0.523829	-0.523013
2015	002195	二三四五	42.91	37	112.75	22.6	-0.1341	4.17868	3642689564	176406844876	229	32254110640	16672372457	1.1665	1.1671
2016	002195	二三四五	36.77	11.32	33.3	11.17	-0.69405	2.28985	4425392760	71126487019	244	2.18772e+10	9.95152e+09	-0.385733	-0.385405
2015	002202	金风科技	14.22	22.79	25.3	13.21	0.61288	6.32482	17301804818	329008793837	244	62342979390	6.05628e+10	0.649957	0.641189
2016	002202	金风科技	22.2	17.11	22.01	14.4	-0.24923	2.50088	6841271730	114647946278	244	46805106510	4.5471e+10	-0.226511	-0.22817
2017	002202	金风科技	17.12	18.85	19.23	11.47	0.10169	1.21094	4306339640	67997621615	244	67034432205	6.51237e+10	0.451413	0.443892
2018	002202	金风科技	18.87	9.99	19.38	8.62	-0.47003	1.62628	5783370977	83047634461	243	35526470967	3.50118e+10	-0.462033	-0.459416
2015	002230	科大讯飞	26.68	37.05	68.05	23.96	0.39024	7.17061	9225898404	372767990726	231	4.76695e+10	3.36541e+10	1.08955	1.09099
2016	002230	科大讯飞	36.96	27.09	33.97	24.19	-0.26883	3.15899	4145409550	123395480412	196	3.55491e+10	3.1435e+10	-0.266284	-0.266127
2017	002230	科大讯飞	27.29	59.14	71.18	26.38	1.18309	8.77501	12185801163	595958433865	244	8.21273e+10	6.99579e+10	1.19023	1.18678
2018	002230	科大讯飞	60	24.64	66.41	20.3	-0.58336	3.88448	8128392641	321763333155	243	5.156e+10	44885265040	-0.373957	-0.373351
2015	002236	大华股份	22.15	36.9	47.26	23.74	0.68109	5.00003	5799529674	203582341843	241	4.28003e+10	2.43809e+10	0.684816	0.685649
2016	002236	大华股份	37.22	13.68	37.3	12.69	-0.62927	1.49061	4321895162	79060631102	244	3.96639e+10	2.33751e+10	-0.067554	-0.067751
2017	002236	大华股份	13.7	23.09	29.66	13.16	0.68787	2.22562	6451534915	138345881125	244	6.69323e+10	3.92967e+10	0.695554	0.695175
2018	002236	大华股份	23.25	11.46	30.37	11.18	-0.50368	3.00123	8996555549	169580021677	243	3.43527e+10	20950703859	-0.499546	-0.495019
2015	002241	歌尔股份	24.52	34.6	44.68	20.16	0.41052	4.42103	6748528315	219397489637	232	5.28155e+10	42486958934	0.413788	0.414594
2016	002241	歌尔股份	34.97	26.52	32.4	22.15	-0.23353	2.16866	3311538610	92615472080	244	4.04959e+10	3.35282e+10	-0.230859	-0.230636
2017	002241	歌尔股份	26.7	17.35	35.13	16.66	-0.34578	1.97158	6397976670	134478381324	244	5.63026e+10	4.71931e+10	0.314096	0.314103
2018	002241	歌尔股份	17.43	6.88	17.7	6.72	-0.60346	2.10981	6846551602	80856288410	243	2.23263e+10	1.87446e+10	-0.600271	-0.597695
2015	002252	上海莱士	45.09	39.77	92.65	39.69	-0.11838	0.5978	1647697996	96118037210	244	1.09616e+11	8.00558e+10	0.766311	0.765462
2016	002252	上海莱士	39.72	23.09	41.8	21.03	-0.41941	0.2028	1007051503	33296608710	244	1.14659e+11	8.49041e+10	0.04647	0.046316
2017	002252	上海莱士	23.09	19.85	23.17	19.34	-0.14032	0.14928	741944272	15073183754	138	9.86592e+10	9.86262e+10	-0.139067	-0.139021
2018	002252	上海莱士	19.8	8.01	20.05	6.46	-0.59647	0.30718	1528088991	12296052672	49	3.98467e+10	3.98304e+10	-0.596083	-0.595617
2018	002271	东方雨虹	39.97	12.95	46.16	10.97	-0.67593	1.9067	2844951165	58756046661	243	1.93225e+10	1.28655e+10	-0.446524	-0.445323
2015	002292	奥飞娱乐	29.39	51.71	78.45	21.47	0.75288	2.44487	3091662698	113596008984	166	6.539e+10	3.42217e+10	2.50988	2.50847
2016	002292	奥飞娱乐	51.11	22.7	46.54	22.7	-0.56101	4.58049	5990778545	202722505213	244	2.96891e+10	1.52937e+10	-0.560398	-0.56024
2015	002294	信立泰	35.55	30.12	54.07	21.8	-0.15035	2.41205	2523043477	85054002513	244	31506001920	13830501600	0.377458	0.379182
2016	002294	信立泰	30	29.24	30.79	23.28	-0.02922	0.8482	887229400	24982933263	244	30585507840	1.43164e+10	-0.008197	-0.009296
2017	002294	信立泰	29.38	45.19	45.19	27.97	0.54549	1.1469	1199674851	39904591093	244	47269463040	47269463040	0.582585	0.569425
2018	002294	信立泰	45.31	20.89	45.8	20.46	-0.53773	1.44206	1508418928	52634880099	243	21851274240	21848209677	-0.528765	-0.520027
2016	002299	圣农发展	22.2	21.22	30.94	17.05	-0.03502	1.79447	1993478606	49378927627	244	23573298000	1.91034e+10	-0.035016	-0.035016
2015	002304	洋河股份	78.95	68.54	112.3	49.69	-0.13295	0.81614	1229905792	93549230527	244	103288957520	8.45604e+10	0.238468	0.239165
2016	002304	洋河股份	68.47	70.6	77.71	57.1	0.03006	0.46554	701567725	48157490172	244	106393352800	8.69998e+10	0.054387	0.056317
2017	002304	洋河股份	70.9	115	121.3	67.79	0.6289	0.64272	968574629	92429987619	244	173303620000	142578841265	0.669001	0.65864
2018	002304	洋河股份	116.2	94.72	149.5	84.8	-0.17635	0.80268	1209629380	140331315565	243	142741903360	1.18257e+11	-0.161292	-0.154174
2015	002310	东方园林	18.8	26.46	38.36	17.67	0.43259	2.59617	2618783559	64919850155	112	2.66905e+10	1.47688e+10	0.435294	0.436113
2016	002310	东方园林	27.1	14.15	26.4	11.1	-0.46523	2.20254	5896993508	97703710194	237	3.78846e+10	2.00377e+10	0.339814	0.339191
2017	002310	东方园林	14.25	20.17	22.6	13.2	0.42544	2.31275	6200852182	111985583193	244	5.40789e+10	3.27165e+10	0.42791	0.427562
2018	002310	东方园林	20.15	6.96	21.07	6.95	-0.65493	2.04345	5482123148	67415059626	178	1.86908e+10	1.13339e+10	-0.653268	-0.65171
2018	002311	海大集团	23.41	23.17	26.55	18.83	-0.00983	0.61451	971583413	21801684438	243	3.66367e+10	3.57922e+10	0.002176	0.000855
2017	002352	顺丰控股	41.66	50.36	70	38.3	0.21233	0.32799	1446751459	80308428151	244	2.22139e+11	8.28178e+09	0.214726	0.214733
2018	002352	顺丰控股	50.36	32.75	53.15	32.7	-0.34968	0.14871	657094254	28524020355	243	1.44715e+11	3.67773e+10	-0.346712	-0.345314
2015	002385	大北农	13.42	12.21	26.68	9.51	-0.09016	4.17752	11420406553	197530830234	224	3.33794e+10	1.85762e+10	0.370035	0.372206
2016	002385	大北农	12.26	7.1	11.96	7.1	-0.41851	1.18848	4873557016	43484654747	244	2.91148e+10	1.69136e+10	-0.122133	-0.121212
2017	002385	大北农	7.11	6.06	7.15	5.83	-0.14648	0.98987	4200024330	26720133620	244	2.57125e+10	1.37462e+10	-0.137901	-0.138028
2015	002399	海普瑞	25.88	35.37	47.68	24.06	0.37093	2.07495	1660377280	56749024577	186	28303074000	28303074000	0.380116	0.382558
2018	002410	广联达	19.89	20.81	31.55	16.8	0.06173	2.13625	2406593685	60725568137	243	2.34435e+10	1.84462e+10	0.071731	0.07449
2017	002411	必康股份	27.13	26.67	29.63	21.04	-0.01405	0.43751	670394049	17590250567	217	4.0866e+10	7.65758e+09	-0.01123	-0.011091
2018	002411	必康股份	26.68	21.08	34.1	16.68	-0.2096	0.48749	746966402	17843340992	136	3.23005e+10	6120190655	-0.206489	-0.205849
2015	002415	海康威视	22.44	34.39	52.3	24.26	0.53733	1.86056	7570206968	272570560749	201	1.39925e+11	1.08514e+11	0.557163	0.555208
2016	002415	海康威视	34.51	23.81	32.96	20.49	-0.30765	0.6018	3672610631	95598658708	244	1.45305e+11	1.12242e+11	0.061851	0.058883
2017	002415	海康威视	23.95	39	43	24.1	0.63797	0.9106	8403848410	274257849743	244	359925739446	283048389546	1.49312	1.48215
2018	002415	海康威视	39.29	25.76	44.29	23.6	-0.33949	0.95421	8804783532	294103772465	243	2.37694e+11	2.0387e+11	-0.331545	-0.326667
2015	002422	科伦药业	29.3	18.6	51	14.37	-0.36367	2.32758	3351718926	91378539830	240	26784000000	1.35962e+10	0.280638	0.281218
2017	002422	科伦药业	16.15	24.9	25.8	15.02	0.54467	1.08573	1563458097	29680866782	244	35856000000	25614915105	0.558019	0.5533
2018	002422	科伦药业	24.73	20.65	35.8	20.28	-0.17068	1.70548	2455624904	69940279673	243	29732809575	2.1255e+10	-0.164707	-0.162289
2016	002424	贵州百灵	25.6	18.94	24.8	14.56	-0.26189	1.79257	2529681382	49114262858	244	26728128000	1.38577e+10	-0.258233	-0.258769
2016	002426	胜利精密	26.2	8.27	25.92	8.22	-0.68217	1.45515	4978465650	67839100970	235	2.82939e+10	1.60863e+10	-0.203771	-0.203497
2015	002450	康得新	28.9	38.1	67.58	25.27	0.31515	4.48953	7222472170	261998123429	233	6.12928e+10	5.45393e+10	0.974774	0.975397
2016	002450	康得新	38.19	19.11	36.15	15.99	-0.49843	2.00674	7072397177	148794682984	211	6.73497e+10	5.49591e+10	0.005116	0.004798
2017	002450	康得新	19.2	22.2	26.65	17.45	0.1617	2.19857	7770160707	164170856582	221	7.8459e+10	6.40649e+10	0.164951	0.164678
2015	002456	欧菲科技	19.02	31.02	54.01	16.74	0.63608	8.24398	8496349533	244331866124	229	31969584240	2.53922e+10	0.640373	0.64135
2016	002456	欧菲科技	30.6	34.28	39.63	19.8	0.10509	5.28377	5739585550	168327155606	244	3.72372e+10	3.52391e+10	0.107738	0.10735
2017	002456	欧菲科技	33.8	20.59	42	16.09	-0.39936	2.62283	7121317837	170247240001	241	5.59045e+10	5.47198e+10	0.505581	0.504813
2018	002456	欧菲科技	20.52	9.19	22.53	9.02	-0.55367	3.68796	10004937506	161179602856	243	2.49312e+10	2.45179e+10	-0.552341	-0.551433
2017	002460	赣锋锂业	26.46	71.75	100	25.54	1.70653	10.0774	7475154286	421567527218	243	5.32221e+10	37281256950	1.71185	1.7103
2018	002460	赣锋锂业	71.76	22.08	81.54	21.99	-0.69226	5.21469	6857746048	310690862745	243	2.9037e+10	2.20964e+10	-0.535591	-0.532822
2015	002465	海格通信	19.37	16.69	48.93	12.4	-0.13613	4.1167	8833415871	231048933764	225	3.58126e+10	3.06585e+10	0.737683	0.738095
2016	002465	海格通信	15.02	11.65	15.02	11.11	-0.30198	1.69297	3632690941	45567569849	141	2.4998e+10	2.14322e+10	-0.292587	-0.29299
2016	002466	天齐锂业	138.99	32.45	197	32.45	-0.76945	5.28224	5252778237	379694559646	243	32269000390	3.19911e+10	-0.122329	-0.121776
2017	002466	天齐锂业	32.63	53.21	81.98	32.38	0.63975	5.80135	6625447328	370054236325	238	6.07686e+10	6.04219e+10	0.839171	0.797844
2018	002466	天齐锂业	53.25	29.32	63.43	27.53	-0.44898	4.14415	4732835210	215232065388	230	3.3485e+10	3.33063e+10	-0.447051	-0.445217
2017	002468	申通快递	30.22	24.69	31.79	23.89	-0.18299	0.73511	1125311974	30481248551	244	3.77955e+10	8191549440	-0.179657	-0.179682
2018	002468	申通快递	24.69	16.45	25.67	14.7	-0.33374	0.83267	1274645763	24357122044	243	2.51817e+10	5457715200	-0.328008	-0.325638
2015	002470	金正大	26.9	20.34	58.25	15.63	-0.24387	1.92069	3010887743	79962690067	233	3.18851e+10	2.75068e+10	0.516181	0.517844
2016	002470	金正大	20.34	7.9	19.29	7.29	-0.6116	1.1233	3526918830	34052147984	236	2.48043e+10	2.14015e+10	-0.218207	-0.218289
2017	002470	金正大	7.91	9.15	9.15	6.85	0.15823	0.70349	2216001231	17035092572	196	2.88228e+10	2.35943e+10	0.173879	0.170886
2015	002475	立讯精密	27.8	31.95	57.44	23.96	0.15426	1.94354	2443950438	88173097311	228	40176379287	3.98253e+10	0.734126	0.734285
2016	002475	立讯精密	32.1	20.75	31.29	17.42	-0.35055	0.9779	2073207185	46776216105	244	43991216614	38882346664	-0.022713	-0.023005
2017	002475	立讯精密	20.7	23.44	30.22	19.03	0.12964	1.1258	3572108585	83901678494	243	7.43742e+10	7.41153e+10	0.699104	0.698313
2018	002475	立讯精密	23.44	14.06	25.82	13.13	-0.40017	1.37609	5662100558	108746110872	243	5.78515e+10	5.77935e+10	-0.218325	-0.217662
2018	002493	荣盛石化	14.61	10.09	17.1	9.19	-0.29686	0.49494	3113750053	38643728262	243	6.34773e+10	51719549025	0.062968	0.063066
2015	002500	山西证券	16	15.24	27.66	9.15	-0.0475	7.31897	18434471498	321364358497	239	3.83854e+10	3.79243e+10	-0.044421	-0.044375
2016	002500	山西证券	15.15	12.02	17.11	9.33	-0.21129	4.78975	13548882161	186622615201	244	3.40013e+10	3.02751e+10	-0.201744	-0.198163
2017	002500	山西证券	12.06	9.22	12.36	8.68	-0.23295	2.8812	8150121643	89710543698	244	2.60808e+10	2.60808e+10	-0.225433	-0.225458
2017	002508	老板电器	36.6	48.1	57.58	36.94	0.30707	1.52732	1449478669	64539764025	244	4.56485e+10	4.47538e+10	0.71532	0.712772
2018	002508	老板电器	48.28	20.19	54.4	19.02	-0.58025	2.49885	2371491448	75897076630	243	1.9161e+10	1.88683e+10	-0.571629	-0.564657
2017	002555	三七互娱	16.49	20.54	26.8	15.92	0.25244	1.03917	2232258283	49778073589	233	4.41222e+10	2.50093e+10	0.257844	0.258537
2018	002555	三七互娱	20.57	9.44	21.81	9.44	-0.54041	1.20549	2561507034	37605481664	243	2.00588e+10	1.15172e+10	-0.531903	-0.530672
2017	002558	巨人网络	58.97	36.8	90	34.1	-0.38554	0.39544	800530720	44012928716	244	7.44972e+10	12803980768	-0.259878	-0.259309
2018	002558	巨人网络	36.15	19.37	38.5	18.3	-0.47364	0.51255	1037591057	24753568375	208	3.92122e+10	8.27311e+09	-0.468916	-0.468207
2017	002572	索菲亚	54.17	36.8	73.9	34.24	-0.32053	0.97827	903361386	37256210648	244	33982088208	22807289808	0.372155	0.371861
2015	002594	比亚迪	38.3	64.4	83.6	36.23	0.68807	1.94218	4808828016	279863239152	234	159454400000	1.07602e+11	0.688073	0.688073
2016	002594	比亚迪	64.4	49.68	64.3	45.3	-0.22857	0.66205	1806167897	103785107612	244	1.35534e+11	8.72077e+10	-0.222945	-0.222873
2017	002594	比亚迪	49.6	65.05	72.79	47.76	0.30938	0.8406	2293270189	136095898288	244	1.77466e+11	1.33569e+11	0.314184	0.312963
2018	002594	比亚迪	65.28	51	67.08	37.29	-0.21599	0.77906	2125400264	113218114092	243	139135285605	104917909869	-0.213384	-0.21382
2017	002601	龙蟒佰利	12.7	16.02	20.13	12.09	0.2654	2.42368	4925149554	84097219115	244	3.25542e+10	1.07621e+10	0.321903	0.320758
2018	002601	龙蟒佰利	16.12	12.3	19.09	11.87	-0.23221	1.25428	2548726849	40064671998	203	2.49939e+10	8.67803e+09	-0.165472	-0.157054
2017	002602	世纪华通	50	33.98	42.2	29.3	-0.27533	0.73365	753529788	25834547506	240	3.49006e+10	2.71206e+10	-0.273076	-0.273193
2018	002602	世纪华通	33.75	20.65	36.09	18.75	-0.39229	0.28464	664566982	16985714872	144	4.82127e+10	2.63713e+10	-0.024423	-0.02472
2017	002608	江苏国信	12.31	10.16	14.96	9.67	-0.18328	0.5674	1845849883	22687873298	234	3.3052e+10	5.34135e+09	-0.18328	-0.18328
2017	002624	完美世界	29.79	33.46	36.74	26.1	0.1232	0.69575	914695307	29697192978	244	4.39894e+10	1.12316e+10	0.126709	0.126177
2018	002624	完美世界	33.3	27.85	37.78	20.3	-0.16766	0.83221	1094187689	32226485262	233	3.66172e+10	1.35751e+10	-0.163494	-0.162582
2018	002625	光启技术	30.88	9.9	29.97	6.87	-0.64731	0.53746	1158000366	16801788267	241	2.13304e+10	5.05737e+09	-0.400143	-0.400036
2015	002673	西部证券	37	32.91	79.5	13.8	-0.12123	5.34867	14952569483	543880321278	244	9.20022e+10	75693000000	0.761147	0.761549
2016	002673	西部证券	32	20.77	29.81	19.22	-0.36888	6.47893	18112306565	450063191644	236	5.8064e+10	5.8064e+10	-0.362964	-0.3622
2017	002673	西部证券	20.83	12.32	21.04	12.16	-0.40684	2.19984	7703473168	120790401774	238	4.31427e+10	4.31427e+10	-0.316059	-0.308163
2018	002673	西部证券	12.34	7.67	13.62	6.83	-0.37744	2.08852	7313677080	65374127177	243	2.68591e+10	2.68591e+10	-0.371306	-0.371753
2016	002714	牧原股份	47.07	23.28	60.65	22.78	-0.50542	1.79312	1853632280	69009642095	234	2.40656e+10	7.14812e+09	-0.004167	-0.003335
2017	002714	牧原股份	23.15	52.86	54.95	22.9	1.27062	1.52274	1764033082	59309601359	244	6.12364e+10	3.04155e+10	1.32519	1.3003
2018	002714	牧原股份	53	28.75	62.22	21.21	-0.45611	0.65225	1360085684	49157521021	243	5.99505e+10	3.08546e+10	-0.004941	-0.007946
2015	002736	国信证券	11.18	19.75	34.71	11.18	0.9439	2.49171	20432018818	486121441393	237	161950000000	43352427495	0.957963	0.963583
2016	002736	国信证券	19.97	15.55	18.37	13.5	-0.21266	0.52798	4329455115	71114624910	244	127510000000	34133177091	-0.184303	-0.182278
2017	002736	国信证券	15.6	10.85	15.83	10.51	-0.30225	0.30785	2524394188	35114812495	244	88970000000	88970000000	-0.29159	-0.289389
2018	002736	国信证券	10.87	8.37	13.71	6.78	-0.22857	0.3117	2555931987	26944219065	243	68634000000	68634000000	-0.216667	-0.214747
2015	002739	万达电影	27.94	120	244.89	30.74	4.62061	1.08168	1270207309	158122508758	185	140915396880	14400000000
2016	002739	万达电影	121.02	54.07	108	54.07	-0.54942	1.10721	1300186161	98740390513	173	6.34941e+10	21952420000	-0.548215	-0.54775
2017	002739	万达电影	54.2	52.04	60.15	50.97	-0.03754	0.56482	663266370	36714437292	120	6.11103e+10	2.2005e+10	-0.034194	-0.033845
2018	002739	万达电影	31.1	21.83	31.1	21.11	-0.58051	0.42334	745684998	16940017328	40	3.84523e+10	3.73355e+10	-0.368075	-0.366929
2018	002773	康弘药业	61.67	34.07	62	34.07	-0.44763	0.56865	383391702	19034199600	243	2.29703e+10	1.62359e+10	-0.444704	-0.443093
2016	002797	第一创业	12.77	34.8	43.96	15.32	2.27068	2.46087	5386848978	196030057602	159	76177200000	7621200000
2017	002797	第一创业	34.9	9.8	35.1	8.28	-0.71839	5.56727	19498810608	231891255988	227	34323520000	1.88008e+10	-0.548173	-0.548276
2018	002841	视源股份	72.39	56.9	94.9	50.15	-0.21517	0.32048	210067690	13243965369	243	37296831346	3788238128	0.263856	0.264
2018	002925	盈趣科技	27	43.88	104.24	31.54	0.95022	3.12051	1430847125	96718194134	232	20120274460	3222099624
2015	300002	神州泰岳	16.52	13.1	39.08	9.53	-0.21084	5.49104	10908017081	208177994730	233	2.60233e+10	1.40164e+10	0.189342	0.192572
2015	300003	乐普医疗	23.89	38.6	56.12	22.79	0.62185	2.87615	2335434692	89442969093	233	31343200000	26483719585	0.626775	0.627731
2016	300003	乐普医疗	38.3	17.93	37.88	17.51	-0.53549	0.63963	1115239813	27006906818	220	3.12622e+10	2.46011e+10	-0.06674	-0.066839
2017	300003	乐普医疗	17.88	24.16	25.06	16.5	0.34746	1.04399	1860034014	39193520206	244	4.30447e+10	3.41058e+10	0.353938	0.352928
2018	300003	乐普医疗	24.5	20.81	39.8	20.1	-0.13866	2.11658	3771017467	115666094308	243	3.70762e+10	2.88507e+10	-0.135523	-0.133402
2015	300015	爱尔眼科	27.64	31.58	58.41	23.49	0.14628	1.98757	1958873929	67573596314	242	3.1124e+10	2.46785e+10	0.723605	0.724628
2016	300015	爱尔眼科	31.3	29.9	38.51	27.22	-0.0532	0.9482	955011125	31118254628	241	3.01147e+10	2.35316e+10	-0.04556	-0.043898
2017	300015	爱尔眼科	30	30.8	33.8	21.2	0.0301	0.80359	1274479084	34178895420	237	4.88483e+10	3.68909e+10	0.553491	0.551171
2018	300015	爱尔眼科	31	26.3	50.16	26.12	-0.1461	1.23103	2934001298	96456924192	243	6.26829e+10	4.77889e+10	0.288489	0.290537
2015	300017	网宿科技	48.2	59.99	107	35.77	0.24461	5.79494	4102696121	245725431789	218	4.24717e+10	3.02167e+10	1.74137	1.74041
2016	300017	网宿科技	59.6	53.61	75.5	48.48	-0.10635	2.99689	2377385813	146911433222	244	4.2528e+10	2.71325e+10	-0.103551	-0.103017
2017	300017	网宿科技	53.9	10.64	55.97	8.64	-0.80153	4.378	10549660289	153778419142	226	2.56392e+10	1.69151e+10	-0.401456	-0.400834
2018	300017	网宿科技	10.6	7.83	15	6.97	-0.2641	5.41367	13170484861	152370547227	243	1.9049e+10	1.50566e+10	-0.262091	-0.261306
2015	300024	机器人	39.2	68.5	128	39.01	0.73902	8.675	6152307561	442269927009	244	48580188081	4.34172e+10	0.73994	0.740289
2016	300024	机器人	68.52	21.38	63.8	21.17	-0.68788	2.87122	4479796221	147806542065	244	3.33579e+10	3.23691e+10	-0.312211	-0.311883
2017	300024	机器人	21.46	18.82	22.94	18.04	-0.11974	2.32869	3633311033	76352563255	244	2.93637e+10	2.84853e+10	-0.119738	-0.119738
2018	300024	机器人	18.86	13.22	22	13.22	-0.29756	2.29289	3577457477	65402621179	243	2.06264e+10	2.00102e+10	-0.295608	-0.294899
2015	300027	华谊兄弟	26.36	41.48	63.58	26.27	0.573	7.1123	9898376106	379586963451	184	5.77288e+10	3.91612e+10	0.577576	0.576792
2016	300027	华谊兄弟	41.85	11	38.35	10.98	-0.73481	2.39323	6666776592	125365301207	197	30642550334	20893628756	-0.467961	-0.467437
2017	300027	华谊兄弟	11	8.73	11.21	7.68	-0.20636	2.05628	5705158634	52304207658	244	2.42214e+10	1.67649e+10	-0.20345	-0.203636
2016	300033	同花顺	70.9	68.78	83.86	51.89	-0.03195	4.95044	2661358374	188649865248	243	36976128000	1.81318e+10	-0.018145	-0.021534
2017	300033	同花顺	69.25	49.98	73.2	47.94	-0.27334	2.06085	1107914374	66764457312	244	26869248000	1.31757e+10	-0.263589	-0.26025
2018	300033	同花顺	49.98	38.2	62.13	28.8	-0.23569	2.14819	1154865749	53762152035	243	20536320000	1.00888e+10	-0.222441	-0.217687
2015	300058	蓝色光标	21.03	14.73	47.69	10.98	-0.30256	4.5088	8707252746	204679288337	173	2.84461e+10	2.11915e+10	0.398411	0.40082
2015	300059	东方财富	28	52.03	101.82	28.77	0.86087	8.83254	16374584855	925427204856	193	9.6458e+10	6.7184e+10	1.60867	1.60737
2016	300059	东方财富	51.58	16.93	46.83	16.93	-0.67461	5.29552	18843147719	506214602209	239	6.02424e+10	4.48347e+10	-0.412935	-0.412377
2017	300059	东方财富	17	12.95	17.29	10.38	-0.23509	4.50257	19310532793	259755930017	244	5.55397e+10	4.12871e+10	-0.079479	-0.07974
2018	300059	东方财富	13.01	12.1	16.93	10.16	-0.06564	6.2884	32500242329	442134017234	243	6.25362e+10	50257525087	0.122541	0.12278
2015	300070	碧水源	34.4	51.77	62.1	31.93	0.48764	2.44331	3003954993	139508057137	189	6.36491e+10	3.43533e+10	0.490957	0.491477
2016	300070	碧水源	51.75	17.52	47.6	14.24	-0.66158	1.02673	3206899682	72076567373	230	5.4722e+10	3.5193e+10	-0.163866	-0.164172
2017	300070	碧水源	17.55	17.37	22.48	15.31	-0.00856	2.95965	9274618786	177413295421	244	5.44321e+10	3.3368e+10	-0.005549	-0.005365
2018	300070	碧水源	17.43	7.8	19.16	7.53	-0.55095	2.04307	6436708300	87085489100	243	2.4574e+10	16848206661	-0.547444	-0.545786
2016	300072	三聚环保	34	46.29	54.61	23.83	0.36267	2.75843	3289680971	122718622244	244	5.52051e+10	4.13213e+10	1.0383	1.03397
2017	300072	三聚环保	46.22	35.13	63.43	30	-0.24109	1.6643	3008994218	117819409243	244	6.35138e+10	4.83263e+10	0.142146	0.142687
2018	300072	三聚环保	35.15	9.84	39.35	9.83	-0.7199	1.29263	3038332190	65256201338	223	2.3129e+10	2.09594e+10	-0.634362	-0.63302
2015	300104	乐视网	33.7	58.8	179.03	30.73	0.81258	6.48966	12039443579	710322480593	222	109084239138	6.42346e+10	2.98868	2.98909
2016	300104	乐视网	52.89	35.8	56.32	35.8	-0.39116	1.75498	3477806243	160464954874	118	7.09441e+10	4.43777e+10	-0.390822	-0.390629
2017	300122	智飞生物	16.48	28.07	30.65	13.97	0.70431	0.93904	1502468555	35164745830	244	44912000000	2.43976e+10	0.705143	0.704918
2018	300122	智飞生物	28.19	38.76	52.96	23.96	0.38083	2.13417	3414670972	138301569151	243	62016000000	33603719409	0.384677	0.385465
2015	300124	汇川技术	29.28	47.2	73.2	30.05	0.61699	4.52114	3595442332	164281697001	242	37535876936	2.93459e+10	0.636154	0.634121
2016	300124	汇川技术	46.9	20.33	43.02	17.09	-0.56928	1.44906	2332114357	56512541239	244	3.27191e+10	2.57492e+10	-0.126014	-0.128021
2017	300124	汇川技术	20.33	29.02	30.97	19.23	0.42745	1.24274	2069299323	51928793038	244	4.83215e+10	3.70388e+10	0.444909	0.440974
2018	300124	汇川技术	28.99	20.14	35.72	19.99	-0.306	1.34963	2246003094	64559376302	243	3.35163e+10	2.70417e+10	-0.299455	-0.295658
2015	300133	华策影视	25.08	29.79	42.82	19.89	0.1878	3.54213	3866732032	118589578040	235	3.252e+10	2.08581e+10	0.784615	0.784091
2016	300133	华策影视	29.6	11.35	27.95	11.35	-0.619	1.64039	2865146072	54207376010	244	1.98242e+10	1.30853e+10	-0.389284	-0.388922
2017	300136	信维通信	28.48	50.7	60	25.1	0.77895	2.25494	2216229697	88180658658	244	4.98297e+10	3.77679e+10	0.781133	0.780702
2018	300136	信维通信	50.92	21.61	52.5	20.79	-0.57377	4.36098	4254549352	136565407299	243	2.10826e+10	1.75052e+10	-0.572765	-0.572189
2018	300142	沃森生物	18	19.1	25.7	14.08	0.04658	2.25776	3471164768	70129641781	243	2.9365e+10	2.62698e+10	0.046575	0.046575
2015	300144	宋城演艺	33.13	28.3	95.58	15.79	-0.06042	1.5453	2244831972	94481447099	171	4.11109e+10	3.44994e+10	1.26616	1.2669
2016	300144	宋城演艺	28.16	20.94	29.67	20.26	-0.26007	1.68902	2453487679	61314521465	242	3.04177e+10	2.35751e+10	-0.258201	-0.257597
2017	300144	宋城演艺	20.95	18.66	22.07	17.7	-0.10888	1.18282	1718179063	34273890036	244	27105661548	2.15048e+10	-0.104401	-0.104107
2018	300144	宋城演艺	18.7	21.35	27.04	17.67	0.14416	1.77381	2576652358	56456172549	243	31013176530	2.52613e+10	0.150703	0.150589
2015	300146	汤臣倍健	26	38.5	55.48	25.47	0.48077	4.63067	3371177618	126238582797	242	28028421190	12991152790	0.498544	0.5
2016	300168	万达信息	33.13	20.22	33.07	20.22	-0.38968	8.2269	8418326992	216289247491	226	2.06905e+10	2.02433e+10	-0.388005	-0.387564
2015	300251	光线传媒	23.49	30.29	49.86	18.52	0.2813	6.26181	9184850270	274508113195	238	4.44295e+10	3.70916e+10	0.669324	0.669924
2016	300251	光线传媒	30.05	9.76	27.63	9.71	-0.67778	1.78215	5228141454	80661532706	210	2.8632e+10	2.68558e+10	-0.352752	-0.352261
2017	300251	光线传媒	9.8	10.45	10.94	7.88	0.0707	1.37055	4020669587	38015964809	244	3.06562e+10	2.87587e+10	0.075764	0.074795
2018	300251	光线传媒	10.59	7.6	13.8	6.37	-0.27273	2.75664	8086903445	86310474042	243	2.22954e+10	2.08462e+10	-0.259172	-0.253589
2018	300296	利亚德	19.5	7.69	25.43	6.64	-0.60544	2.11241	5371604496	62954462438	243	1.95547e+10	1.26439e+10	-0.405376	-0.402514
2015	300315	掌趣科技	17.41	14	41.81	8.91	-0.1156	7.89514	20988249302	380941327057	191	37217284146	22212312010	0.681581	0.682186
2016	300315	掌趣科技	13.82	9.24	12.74	9.19	-0.34	5.86844	16260725362	177407247705	244	2.56029e+10	1.78925e+10	-0.338946	-0.338786
2018	300408	三环集团	20.18	16.92	27.03	16.58	-0.16071	1.5172	2645114981	58030139982	243	2.94986e+10	2.78512e+10	-0.15384	-0.150794
2018	300433	蓝思科技	30.38	6.51	31.15	6.51	-0.78191	0.86567	3399293592	57802473257	243	2.55635e+10	2.54563e+10	-0.669177	-0.665171
2015	600000	浦发银行	15.88	18.27	20.1	12.39	0.16444	2.95218	55068431925	904245792898	230	3.40799e+11	3.40799e+11	0.216226	0.212683
2016	600000	浦发银行	18.28	16.21	18.45	15.28	-0.11275	0.26683	5768478295	98166226399	226	3.50432e+11	3.3261e+11	0.005038	0.00416
2017	600000	浦发银行	16.21	12.59	16.91	12.29	-0.22332	0.32865	9646576934	130194244482	244	3.69543e+11	3.53826e+11	0.021698	0.022023
2018	600000	浦发银行	12.61	9.8	13.65	9.26	-0.2216	0.29695	8716078598	103037381083	243	2.8765e+11	2.75417e+11	-0.213403	-0.213662
2018	600004	白云机场	14.73	10.05	18.78	9.76	-0.31633	1.46368	3028816246	42456093024	243	2.07967e+10	2.07967e+10	-0.304845	-0.3
2015	600005	武钢股份	3.58	3.47	7.27	3.12	-0.03073	4.8802	49259675585	263647657283	244	3.50254e+10	3.50254e+10	-0.02307	-0.01676
2015	600008	首创股份	11.8	10.19	19.57	7.79	-0.13644	6.14835	14819421849	199365620572	244	2.4561e+10	22418000000	-0.128041	-0.123729
2016	600008	首创股份	10.22	4.11	9.4	3.76	-0.59666	1.38826	6692247093	36171897977	244	1.98127e+10	1.98127e+10	-0.178463	-0.178606
2017	600008	首创股份	4.1	5.14	8.33	4.1	0.25061	6.6852	32226760109	217317053483	234	2.4778e+10	2.4778e+10	0.264982	0.270073
2015	600009	上海机场	19.82	29.52	40.23	18.4	0.50459	2.59729	5004867900	141526157606	244	5.68838e+10	3.22794e+10	0.523523	0.522426
2016	600009	上海机场	29.53	26.52	30.09	25.22	-0.10163	0.71126	1370568241	37786333308	244	5.11029e+10	2.8999e+10	-0.087996	-0.08706
2017	600009	上海机场	26.55	45.01	45.87	26.65	0.69721	0.86576	1668275238	61266468019	244	8.67324e+10	4.92174e+10	0.717413	0.713801
2018	600009	上海机场	45	50.76	62.76	43.03	0.12775	0.7689	1481642566	77354594703	243	9.78124e+10	5.55049e+10	0.139266	0.140635
2015	600010	包钢股份	4.09	3.61	7.28	3.22	-0.1152	2.97448	96851300463	537681896632	244	1.17544e+11	5.68287e+10	-0.115196	-0.115196
2016	600010	包钢股份	3.62	2.79	3.62	2.69	-0.22715	0.71496	23279643314	69438507217	244	9.08445e+10	4.39202e+10	-0.227147	-0.227147
2017	600010	包钢股份	2.83	2.46	3.24	2.14	-0.11828	0.67258	30659425912	84714993712	244	1.12139e+11	5.42155e+10	0.234408	0.234409
2018	600010	包钢股份	2.46	1.48	2.55	1.46	-0.39837	0.76506	34875338294	59579639050	234	6.74658e+10	4.68823e+10	-0.396408	-0.396341
2015	600011	华能国际	8.91	8.73	14.08	7.19	-0.01133	1.2647	19223899957	202148183645	244	1.32699e+11	1.32699e+11	0.018851	0.03171
2016	600011	华能国际	8.72	7.05	8.4	6.68	-0.19244	0.18714	2844612449	20990658621	244	107162703252	107162703252	-0.139133	-0.138603
2017	600011	华能国际	7.05	6.17	8.3	6.17	-0.12482	0.25874	3932885355	28779078519	244	9.37864e+10	9.37864e+10	-0.090246	-0.083688
2018	600011	华能国际	6.18	7.38	7.95	5.82	0.19611	0.26984	4236006000	29036053129	243	1.15852e+11	1.12179e+11	0.214711	0.212318
2015	600015	华夏银行	13.56	12.14	17.75	8.61	-0.09807	2.46907	26383381042	357313782752	244	1.29723e+11	9.45126e+10	0.113382	0.114636
2016	600015	华夏银行	12	10.85	12.04	9.21	-0.10626	0.78413	8378914552	87319261423	244	1.15938e+11	1.15938e+11	-0.072606	-0.076359
2017	600015	华夏银行	10.89	9	11.93	8.93	-0.17051	0.65003	8335115780	84257663032	244	115404179877	115404179877	0.011535	0.012074
2018	600015	华夏银行	9.02	7.39	10.4	7.18	-0.17889	0.49781	6383200224	54447222299	243	9.47597e+10	9.47597e+10	-0.162246	-0.162111
2015	600016	民生银行	10.87	9.64	11.1	7.47	-0.11397	2.50052	91232457277	898743343470	244	3.51719e+11	3.51719e+11	-0.098307	-0.096967
2016	600016	民生银行	9.48	9.08	9.85	8.21	-0.05809	0.51675	18853624470	172252071082	244	3.31287e+11	3.31287e+11	-0.020437	-0.021784
2017	600016	民生银行	9.08	8.39	9.27	7.71	-0.07599	0.64587	23564624721	198858707148	244	3.06112e+11	3.06112e+11	-0.043021	-0.044604
2018	600016	民生银行	8.43	5.73	9.45	5.6	-0.31704	0.39855	17449507791	129327204400	243	2.50873e+11	2.50873e+11	-0.169477	-0.169726
2015	600018	上港集团	6.5	6.48	10.65	5.82	0.00935	1.36387	31605991264	261439612128	244	150165411732	147453564132	0.026733	0.033333
2016	600018	上港集团	6.49	5.12	6.13	4.53	-0.20988	0.2538	5881490920	30634082530	244	118649214208	116506519808	-0.186522	-0.186111
2017	600018	上港集团	5.12	6.65	8.64	5.14	0.29883	0.44539	10321361313	70914948936	241	1.54105e+11	1.51322e+11	0.329573	0.329297
2018	600018	上港集团	6.69	5.18	7.68	4.86	-0.22105	0.25633	5940056481	40627617844	243	120039634687	120039634687	-0.200053	-0.195188
2015	600019	宝钢股份	7	5.58	9.87	5.16	-0.20399	2.27915	37531949965	281763025529	244	9.18887e+10	9.16475e+10	-0.187138	-0.178317
2016	600019	宝钢股份	5.6	6.35	7.19	4.83	0.13799	0.67903	11170287587	64007999965	171	1.0446e+11	1.04294e+11	0.15125	0.148746
2017	600019	宝钢股份	6.35	8.64	9.42	5.85	0.36063	0.98345	21735406806	165412926943	225	190955090952	190855234584	0.405841	0.393701
2018	600019	宝钢股份	8.69	6.5	11.23	6.33	-0.24769	0.87984	19592263553	172851924995	243	1.44741e+11	1.43657e+11	-0.208817	-0.195602
2015	600021	上海电力	7.86	14.72	33.9	7.92	0.88476	7.35437	15736439891	301472949986	244	3.1497e+10	3.1497e+10	0.906979	0.916773
2016	600021	上海电力	14.71	12.14	13.8	9.5	-0.17527	1.23097	2633958247	30265953554	173	2.59764e+10	2.59764e+10	-0.156443	-0.158288
2015	600023	浙能电力	7.17	7.49	14.94	6.2	0.04463	2.22459	30255949602	285358890050	244	1.01869e+11	2.23771e+10	0.068767	0.079498
2016	600023	浙能电力	7.49	5.43	7.1	5.03	-0.27503	0.54504	7412892933	40753589009	244	7.38517e+10	7.38517e+10	-0.236878	-0.238985
2017	600023	浙能电力	5.43	5.33	5.92	5.27	-0.01842	0.42628	5797725336	32459434166	244	7.24917e+10	7.24917e+10	0.023008	0.023941
2018	600023	浙能电力	5.33	4.73	5.98	4.48	-0.11257	0.25957	3530319808	18621432576	243	6.43313e+10	6.43313e+10	-0.082458	-0.080675
2018	600025	华能水电	5.21	3.15	5.35	2.31	-0.40566	0.77738	13992846867	56893293511	243	56700000000	28123200000	-0.394801	-0.395283
2015	600027	华电国际	6.94	6.8	11.34	5.25	-0.02857	2.7714	27334267673	226053478557	244	6.70682e+10	52069570640	9.3e-05	0.01
2017	600027	华电国际	4.96	3.71	5.25	3.71	-0.25051	0.48049	4739063532	22911292063	244	3.65916e+10	3.15418e+10	-0.22825	-0.22303
2018	600027	华电国际	3.71	4.75	4.86	3.4	0.28032	0.66291	6538271279	26362120517	243	4.68491e+10	4.13866e+10	0.285573	0.285175
2015	600028	中国石化	6.59	4.96	8.67	4.49	-0.23575	0.99322	120250691940	807189674322	244	6.00513e+11	6.00513e+11	-0.209029	-0.204931
2016	600028	中国石化	4.97	5.41	5.67	4.27	0.09073	0.20874	25272899284	123420904568	244	6.54995e+11	6.54995e+11	0.123214	0.11875
2017	600028	中国石化	5.42	6.13	6.33	5.51	0.13309	0.23879	28910980267	172035561320	244	7.42167e+11	7.42167e+11	0.18464	0.182994
2018	600028	中国石化	6.16	5.05	7.63	5.05	-0.17618	0.3109	37640960322	251657549482	243	6.1141e+11	6.1141e+11	-0.105078	-0.084829
2015	600029	南方航空	5.18	8.57	15.98	4.48	0.66085	5.03801	49461002451	484890775326	244	84136549190	84136549190	0.666473	0.668605
2016	600029	南方航空	8.45	7.02	8.62	5.86	-0.18086	1.91369	18787761573	135826042119	244	68919320340	68919320340	-0.171462	-0.171529
2017	600029	南方航空	7	11.92	12.3	7.03	0.69801	1.71783	17329807846	150784405640	241	1.20251e+11	117025398640	0.719283	0.712251
2018	600029	南方航空	11.89	6.64	12.79	5.74	-0.44295	1.83779	22544535575	207296244789	243	8.1454e+10	6.69855e+10	-0.4357	-0.434564
2015	600030	中信证券	33.9	19.35	37.82	13.3	-0.4292	7.51802	91095193460	2434636160528	244	234462177540	233999344890	-0.42203	-0.420888
2016	600030	中信证券	19.29	16.06	18.65	13.7	-0.17003	2.35203	28499274467	472263622514	244	194597548904	194213409764	-0.145529	-0.144186
2017	600030	中信证券	16.08	18.1	19.68	15.48	0.12702	1.72893	20949236213	366281624903	244	219316042040	218883108140	0.150643	0.148817
2018	600030	中信证券	18.13	16.01	22.92	14.84	-0.11547	2.27653	27584558143	508363180045	239	193991703484	193608760294	-0.093356	-0.09337
2015	600031	三一重工	9.95	6.58	13.99	5.81	-0.34068	5.83897	44472561193	427196593763	243	5.01166e+10	4.99666e+10	-0.338253	-0.335872
2016	600031	三一重工	6.45	6.1	6.89	4.63	-0.07295	1.17432	8937614836	50772296065	244	4.64263e+10	4.63217e+10	-0.071232	-0.071429
2017	600031	三一重工	6.1	9.07	9.12	6.24	0.48689	2.26317	17323288951	138245868592	244	6.94258e+10	6.88759e+10	0.492498	0.491803
2018	600031	三一重工	9.16	8.34	9.88	7.63	-0.08049	2.4849	19378599628	168984170805	243	6.50579e+10	6.47437e+10	-0.064265	-0.062845
2015	600036	招商银行	16.56	17.99	21.13	13.91	0.08439	1.89528	47798564407	833273572034	239	4.53705e+11	4.53705e+11	0.125644	0.124774
2016	600036	招商银行	17.91	17.6	19.25	14.25	-0.02168	0.27229	6867212187	117567543029	244	4.43869e+11	4.43869e+11	0.017912	0.016676
2017	600036	招商银行	17.6	29.02	30.9	17.94	0.64886	0.47924	12086428479	293852115403	244	7.3188e+11	7.3188e+11	0.706148	0.690909
2018	600036	招商银行	29.02	25.2	34.89	24.85	-0.13163	0.4869	12279442111	360004291624	243	6.3554e+11	6.3554e+11	-0.103622	-0.102688
2016	600037	歌华有线	21.6	15.32	19.38	13.39	-0.28843	3.3115	4608867350	73938250408	244	2.1322e+10	1.78992e+10	-0.279734	-0.280074
2015	600038	中直股份	38.18	52.73	86	34.59	0.40165	5.62073	3313288283	179583554575	244	3.10831e+10	20704434500	0.406317	0.405369
2016	600038	中直股份	54.4	48.42	50.56	37.58	-0.08174	2.04593	1206028483	51657471243	244	2.85425e+10	2.85425e+10	-0.076543	-0.076996
2017	600038	中直股份	48.16	46.53	55.11	39.55	-0.03903	2.52285	1487164164	69843615778	244	2.74284e+10	2.74284e+10	-0.034124	-0.034283
2018	600038	中直股份	46.72	37.36	51.5	32.98	-0.19708	2.53833	1496288353	61628894733	243	2.20229e+10	2.20229e+10	-0.192252	-0.19207
2015	600048	保利地产	11.65	10.64	14.97	6.95	-0.01664	6.02819	64834685802	728475493551	244	1.14436e+11	1.14436e+11	-0.000557	0.003327
2016	600048	保利地产	10.63	9.13	10.66	8.15	-0.14192	1.48035	17553654565	167157087618	237	1.08262e+11	9.82289e+10	-0.107293	-0.109492
2017	600048	保利地产	9.12	14.15	14.15	9.05	0.54984	1.57808	18713568196	201740034982	244	1.67797e+11	1.66069e+11	0.600269	0.584337
2018	600048	保利地产	14.3	11.79	18.69	10.51	-0.16678	2.12662	25296256265	347528153368	243	1.40242e+11	1.38803e+11	-0.141265	-0.138516
2015	600050	中国联通	4.97	6.18	10.54	4.35	0.24848	4.98734	105714605451	766675748105	244	1.30995e+11	1.30995e+11	0.260894	0.262081
2016	600050	中国联通	6.18	7.31	7.81	3.81	0.18285	1.70672	36176739280	197146837409	244	1.54947e+11	1.54947e+11	0.200605	0.192104
2017	600050	中国联通	7.25	6.33	9.04	6.27	-0.13406	1.47337	44545802098	335264682775	149	1.91381e+11	1.34174e+11	-0.134063	-0.134063
2018	600050	中国联通	6.35	5.17	7.27	4.72	-0.18325	1.08017	33515301117	195268212080	243	1.60414e+11	1.09586e+11	-0.179968	-0.180126
2015	600060	海信电器	11.48	19.67	36.78	11.76	0.72091	7.66732	10032537825	201303229818	242	2.57378e+10	2.57378e+10	0.743406	0.749344
2016	600060	海信电器	19.4	17.12	18.81	12.88	-0.12964	2.89515	3788247375	63445738376	244	2.24012e+10	2.24012e+10	-0.112365	-0.112354
2016	600061	国投资本	25.58	15.61	23.6	15.35	-0.39799	1.42872	5277917125	93610428381	233	5.76657e+10	3.06325e+10	-0.390219	-0.38978
2017	600061	国投资本	15.61	13.18	16.71	13.18	-0.15567	0.56282	2379124867	37017647960	244	5.57136e+10	2.5864e+10	-0.151799	-0.151185
2018	600061	国投资本	13.19	8.99	14.2	6.8	-0.31791	0.43376	1833578139	19137090235	243	3.80019e+10	3.75227e+10	-0.313249	-0.313202
2015	600066	宇通客车	22.75	22.49	33.18	16.73	0.00717	2.31474	5124691783	118934861079	244	4.97915e+10	4.28094e+10	0.553424	0.555531
2016	600066	宇通客车	22.49	19.59	23.28	17.89	-0.12895	1.3542	2998110164	61516847394	244	4.33711e+10	3.72893e+10	-0.062182	-0.06225
2017	600066	宇通客车	19.63	24.07	26.74	19.18	0.22869	1.48513	3287992837	72938917057	244	5.32895e+10	5.32895e+10	0.284843	0.279735
2018	600066	宇通客车	24.25	11.85	25.36	10.6	-0.50769	1.14643	2538124468	47226264188	243	2.62352e+10	2.62352e+10	-0.493257	-0.486913
2015	600068	葛洲坝	9.23	7.87	14.69	6.56	-0.15648	7.77381	35796678288	383627951477	244	3.62396e+10	3.26493e+10	-0.145624	-0.140407
2016	600068	葛洲坝	7.85	9.19	9.99	5.22	0.16773	2.70065	12435895320	95246636585	244	4.23179e+10	3.81254e+10	0.202837	0.189962
2017	600068	葛洲坝	9.19	8.2	13.37	8.16	-0.10773	3.47404	15997200701	172262395467	244	3.77592e+10	3.77592e+10	-0.091182	-0.08531
2018	600068	葛洲坝	8.2	6.32	9.8	6.11	-0.22927	2.05786	9475985347	75664580822	243	2.91022e+10	2.91022e+10	-0.20046	-0.196585
2016	600074	*ST保千	16.36	13.24	17.37	9.78	-0.19611	3.35263	8173333712	120438684030	244	3.22776e+10	1.18877e+10	-0.196114	-0.196114
2015	600085	同仁堂	22.5	44.61	44.61	21.45	0.98885	3.58739	4919996923	149086581122	244	6.11813e+10	6.11813e+10	1.00337	0.998663
2016	600085	同仁堂	43.88	31.38	40.15	26.67	-0.29657	1.76306	2417984221	74576840574	244	4.30367e+10	4.30367e+10	-0.291266	-0.291414
2017	600085	同仁堂	31.35	32.24	35.49	29.75	0.02741	1.20193	1648407544	53617148023	244	4.42162e+10	4.42162e+10	0.035032	0.035054
2018	600085	同仁堂	32.25	27.5	42.47	26.51	-0.14702	1.22343	1677900792	57890609240	243	37715432205	37715432205	-0.140072	-0.139268
2015	600089	特变电工	12.43	11.77	20.17	9.72	-0.04927	8.17855	26572533662	398749578394	240	3.82414e+10	3.74065e+10	-0.039434	-0.036349
2016	600089	特变电工	11.79	9.13	11.21	8.12	-0.2243	1.99076	6456935775	58551245295	244	2.96127e+10	2.92126e+10	-0.208036	-0.208997
2017	600089	特变电工	9.13	9.91	12.38	9.1	0.08543	2.85638	10621853432	110287688472	238	3.68518e+10	3.68088e+10	0.147286	0.137017
2018	600089	特变电工	9.91	6.79	10.25	6.34	-0.31483	1.35618	5037544290	40387572549	243	2.52215e+10	2.52202e+10	-0.292732	-0.293643
2015	600100	同方股份	11.69	18.08	32.56	11.48	0.54795	8.9631	26565721948	492269379829	234	5.35873e+10	3.74292e+10	0.554361	0.554795
2016	600100	同方股份	18.15	13.85	16.79	10.6	-0.23396	4.55903	13512497560	191342031772	244	4.105e+10	3.04407e+10	-0.227456	-0.22677
2017	600100	同方股份	13.86	9.8	15.21	9.58	-0.29242	1.53432	4547569897	59239002114	138	2.90462e+10	2.15392e+10	-0.279267	-0.274368
2018	600100	同方股份	9.83	9.73	11.34	8.14	-0.00714	1.30468	3866928454	39468728101	243	2.88387e+10	2.88387e+10	-0.005449	-0.005612
2015	600104	上汽集团	21.7	21.22	28.26	14.11	-0.01164	1.31661	14516391035	340306357224	224	2.33963e+11	2.33963e+11	0.046972	0.048905
2016	600104	上汽集团	21.1	23.45	25.73	17.81	0.10509	0.4208	4639596819	102189159637	244	2.5855e+11	2.5855e+11	0.180994	0.16918
2017	600104	上汽集团	23.57	32.04	34.18	23.85	0.36631	0.61136	7142859055	206080491705	244	3.74338e+11	3.53259e+11	0.443649	0.436674
2018	600104	上汽集团	31.72	26.67	37.32	24.3	-0.1676	0.41201	4813657235	152062854607	243	3.11598e+11	3.06797e+11	-0.120991	-0.110487
2015	600109	国金证券	20	16.12	33.23	11.3	-0.18545	9.93428	30044833999	629339882400	234	4.87527e+10	4.57302e+10	-0.184516	-0.183931
2016	600109	国金证券	16.12	13.03	15.21	10.64	-0.19169	3.87251	11711849277	156259822153	244	3.94074e+10	3.94074e+10	-0.186667	-0.186725
2017	600109	国金证券	13.05	9.54	14.02	9.46	-0.26784	2.36928	7165539900	86869145534	244	2.88524e+10	2.88524e+10	-0.264728	-0.264006
2018	600109	国金证券	9.55	7.16	10.38	5.82	-0.24948	1.84653	5584565560	44717618405	243	2.16544e+10	2.16544e+10	-0.243867	-0.244235
2015	600111	北方稀土	25.91	14.02	34.04	11.64	-0.45827	6.1953	22507928879	477827456409	244	50935585320	3.11133e+10	-0.184323	-0.182573
2016	600111	北方稀土	14.08	12.27	15.24	11.13	-0.12482	3.52903	12821213636	172159485540	244	44577719820	44577719820	-0.122933	-0.122682
2017	600111	北方稀土	12.35	14.59	20.08	10.76	0.18908	4.90635	17825081828	285109816571	244	53006432940	53006432940	0.19018	0.189894
2018	600111	北方稀土	14.6	8.77	15.3	8.76	-0.3989	2.58453	9389767553	115483828532	243	31861988820	31861988820	-0.39706	-0.396504
2015	600115	东方航空	5.25	7.61	13.79	4.63	0.46911	3.02744	39781050213	355180146608	231	9.99968e+10	8.936e+10	0.469112	0.469112
2016	600115	东方航空	7.55	7.07	7.52	5.56	-0.07096	1.22066	17660062219	118429196763	243	1.02286e+11	9.29011e+10	-0.063791	-0.064258
2017	600115	东方航空	7.08	8.21	8.32	6.51	0.16124	1.33226	19274554141	136666425219	244	1.18779e+11	1.18779e+11	0.169636	0.168175
2018	600115	东方航空	8.18	4.75	8.59	4.57	-0.42144	0.99319	14369085320	99457201223	243	6.8721e+10	6.8721e+10	-0.416495	-0.415225
2015	600118	中国卫星	28.99	42.54	78.04	26.54	0.49368	9.12541	10790692820	512149493898	244	5.03031e+10	5.03031e+10	0.495629	0.496489
2016	600118	中国卫星	43.81	31.24	41.24	29.21	-0.26563	2.84664	3366120001	112876753374	244	3.6941e+10	3.6941e+10	-0.263185	-0.263282
2017	600118	中国卫星	31.2	25.25	33.69	25.02	-0.19174	1.74698	2065789139	60982406377	244	2.98579e+10	2.98579e+10	-0.18843	-0.18822
2018	600118	中国卫星	25.3	17.32	25.62	15.24	-0.31406	1.464	1731168817	35640658923	243	2.04807e+10	2.04807e+10	-0.310109	-0.309703
2015	600150	*ST船舶	36.7	34.83	69.29	30.75	-0.05507	7.24358	9982503695	461433567214	244	4.79998e+10	4.79998e+10	-0.054915	-0.054802
2016	600150	*ST船舶	36.45	27.61	34.33	20.98	-0.20729	3.28042	4520807014	113882230491	244	3.80498e+10	3.80498e+10	-0.206588	-0.206718
2015	600153	建发股份	10.3	17.31	25.52	9.07	0.70039	3.30381	9366977843	146537989930	117	4.90773e+10	4.90773e+10	0.720039	0.720039
2016	600153	建发股份	15.58	10.7	15.58	10.62	-0.38186	2.37674	6738532082	77773389220	137	30336645671	30336645671	-0.375713	-0.38321
2017	600153	建发股份	10.71	11.12	13.66	10.39	0.03925	2.32688	6597168137	79066779518	244	3.15274e+10	3.15274e+10	0.071754	0.076636
2018	600153	建发股份	11.12	7.05	13.5	7	-0.36601	1.02966	2919298672	29991157348	243	1.99882e+10	1.99882e+10	-0.350749	-0.348022
2015	600157	永泰能源	4.36	4.77	11.29	4.11	0.09404	2.42824	27183261728	184324332350	201	5.33984e+10	2.19213e+10	0.42454	0.426835
2016	600157	永泰能源	4.77	4.01	4.84	3.52	-0.15933	0.82087	10199976414	42838067526	240	4.98274e+10	1.84286e+10	-0.151473	-0.150943
2017	600157	永泰能源	4.01	3.36	4.19	3.36	-0.16209	0.35473	4407836557	16793485673	215	4.17507e+10	1.95781e+10	-0.159577	-0.159352
2015	600170	上海建工	8.41	7.08	14.3	6.81	-0.15815	2.76609	16439458246	168032107530	244	4.2078e+10	4.07473e+10	0.110773	0.118193
2016	600170	上海建工	7.08	4.73	6.56	3.7	-0.33192	1.66841	11898835898	55729660000	224	3.37337e+10	3.26669e+10	-0.173561	-0.177119
2017	600170	上海建工	4.75	3.72	5.15	3.54	-0.21353	1.09195	9723175378	42242368626	244	3.31244e+10	3.15713e+10	-0.036838	-0.036617
2018	600170	上海建工	3.72	3.03	4.03	2.84	-0.18548	0.54755	4875590369	16846697057	243	2.69803e+10	2.57153e+10	-0.151755	-0.149194
2018	600176	中国巨石	16.5	9.67	18.33	8.98	-0.40638	2.15062	7532137246	94930946073	243	3.38673e+10	3.38673e+10	-0.275674	-0.272314
2015	600177	雅戈尔	11.62	16.28	25.71	10.56	0.41442	6.32754	14088971372	240863067137	226	3.62492e+10	3.62492e+10	0.444061	0.457863
2016	600177	雅戈尔	16.23	13.98	15.93	11.04	-0.14128	1.86514	4771348994	68066569711	244	3.57633e+10	3.1128e+10	-0.093069	-0.092138
2017	600177	雅戈尔	14.03	9.17	14.29	8.93	-0.34406	1.00212	3589046664	39752738260	244	3.28419e+10	3.28419e+10	-0.048016	-0.045923
2018	600177	雅戈尔	9.15	7.19	10.2	6.77	-0.21592	0.59331	2124896584	17962763555	243	2.57506e+10	2.57506e+10	-0.17725	-0.172301
2015	600188	兖州煤业	13.36	9.45	19.05	7.68	-0.283	1.16203	5707911153	79283564098	244	46418551200	46416939975	-0.282184	-0.281487
2016	600188	兖州煤业	9.32	10.86	13.8	8.17	0.14921	0.67778	3329288413	37590723061	243	53344493760	53342533530	0.150256	0.150265
2017	600188	兖州煤业	10.8	14.52	14.96	10.1	0.33702	0.76777	3771283435	47880340525	244	71322472320	71320577460	0.349339	0.348066
2018	600188	兖州煤业	14.58	8.78	19.67	8.75	-0.39532	1.51874	7460068770	101414026095	243	43127500480	43126442490	-0.3746	-0.362259
2015	600196	复星医药	21.05	23.49	38.27	19.68	0.11327	3.22042	7452289031	198348497658	230	5.43576e+10	5.4236e+10	0.125055	0.12654
2016	600196	复星医药	23.49	23.14	24.54	17.32	-0.0149	1.03737	2504736675	52466545764	243	5.58718e+10	5.34765e+10	0.00203	-0.001277
2017	600196	复星医药	23.27	44.5	46.9	23.29	0.92308	1.43533	3581338724	119895444035	244	1.11033e+11	106521855598	0.945746	0.938202
2018	600196	复星医药	44.66	23.27	47.89	23.27	-0.47708	2.07067	5307249740	195436807473	243	5.96424e+10	5.73015e+10	-0.471137	-0.468539
2015	600208	新湖中宝	7.25	4.77	10.22	4.48	-0.34836	2.72022	24753135286	187105827696	241	4.34054e+10	3.88133e+10	-0.344567	-0.34071
2016	600208	新湖中宝	4.77	4.16	4.97	3.46	-0.12788	1.44798	12451661925	51880879355	243	3.57733e+10	3.57684e+10	-0.117575	-0.1174
2017	600208	新湖中宝	4.2	5.22	5.68	4.15	0.25481	1.1228	9655331251	46232867054	241	4.48886e+10	4.48825e+10	0.254808	0.254808
2018	600208	新湖中宝	5.24	2.9	5.68	2.84	-0.44444	1.03147	8869931866	37288784386	243	2.49381e+10	2.49347e+10	-0.435909	-0.433525
2017	600219	南山铝业	3.09	3.68	4.29	3.13	0.19094	2.93879	27187071221	101142210411	244	3.40441e+10	2.60837e+10	0.208401	0.20712
2018	600219	南山铝业	3.7	2.11	3.79	2.11	-0.42663	0.94932	11344879519	33738469194	237	2.52155e+10	2.06513e+10	-0.364036	-0.332939
2015	600221	海航控股	3.48	3.89	6.87	2.89	0.13743	6.12277	74588748682	372891348140	233	4.76381e+10	4.76355e+10	0.148712	0.156082
2016	600221	海航控股	3.88	3.26	3.76	2.95	-0.16195	1.27175	21373192013	70480413033	244	5.51443e+10	4.00681e+10	-0.161954	-0.161954
2017	600221	海航控股	3.25	3.19	3.51	3.13	-0.02147	0.94146	15822340841	52510880833	244	5.37438e+10	5.37417e+10	-0.005854	-0.005706
2018	600221	海航控股	3.19	1.88	3.25	1.79	-0.41066	0.46604	7832306988	17183822732	116	3.17656e+10	3.17643e+10	-0.407013	-0.405016
2017	600233	圆通速递	25.69	16.75	29.27	16.62	-0.34288	0.64181	1813415680	41277671355	244	4.73267e+10	1.31214e+10	-0.337871	-0.336995
2018	600233	圆通速递	16.75	10	18.41	9.9	-0.40299	0.33459	946437386	12758330053	243	28286472510	7833678750	-0.398808	-0.396418
2015	600252	中恒集团	16.33	7.34	30.63	4.99	-0.55134	4.88415	16972938460	253426805124	229	2.55073e+10	2.51769e+10	0.402959	0.402506
2015	600256	广汇能源	8.36	6.67	13.13	6.08	-0.20215	5.78061	30183013775	279401188535	231	3.48269e+10	3.48269e+10	-0.197471	-0.196172
2016	600256	广汇能源	6.64	4.67	6.28	4.02	-0.29985	1.68833	8815468874	40017581429	244	2.43841e+10	2.43841e+10	-0.29985	-0.29985
2015	600271	航天信息	31.3	55.91	101	31.83	0.83251	3.89623	3597775692	209744943525	171	51627294000	51627294000	0.848472	0.853163
2016	600271	航天信息	61.5	19.95	60.03	19.82	-0.64318	1.20852	2231914002	60684011579	174	3.68439e+10	3.68439e+10	-0.279158	-0.277231
2017	600271	航天信息	20.02	21.54	23.48	17.9	0.0797	1.72075	3205511292	66108699459	239	4.01258e+10	3.97803e+10	0.094703	0.092231
2018	600271	航天信息	21.49	22.89	30.9	18.45	0.06267	2.89604	5393924448	133743598414	243	4.2633e+10	4.22735e+10	0.081116	0.082173
2015	600276	恒瑞医药	37.48	49.12	67.25	37.47	0.31057	1.70605	3337881279	160628236026	244	9.61032e+10	9.57416e+10	0.706585	0.706403
2016	600276	恒瑞医药	49.1	45.5	48.52	38.91	-0.0737	0.5666	1330064134	60263933235	243	106809415167	106610667618	0.113943	0.113599
2017	600276	恒瑞医药	45.4	68.98	75.7	45.26	0.51604	0.71611	2017204425	118427366977	244	1.94309e+11	1.94269e+11	0.823362	0.82222
2018	600276	恒瑞医药	69.42	52.75	101.26	50.09	-0.23529	1.20742	4445817679	310256546149	243	1.9423e+11	1.93168e+11	-0.004537	-0.003987
2016	600297	广汇汽车	12.77	8.56	14.27	8.33	-0.33333	0.97011	5336018318	51313447927	244	4.70834e+10	1.57489e+10	-0.333333	-0.333333
2017	600297	广汇汽车	8.56	8.02	10.37	7.17	-0.06308	0.61219	4985850570	43385475506	244	6.53174e+10	1.91821e+10	0.242908	0.241355
2018	600297	广汇汽车	7.96	4.06	8.17	4	-0.49377	0.50419	4143222523	25008722992	243	3.33636e+10	3.30659e+10	-0.482364	-0.475062
2015	600309	万华化学	21.78	17.85	29.2	15.74	-0.18044	3.14718	6805249890	153763623569	236	38597674752	38597674752	-0.171057	-0.166667
2016	600309	万华化学	17.84	21.53	21.67	12.89	0.20616	1.17809	2547434519	45431571633	244	4.65551e+10	4.65551e+10	0.220817	0.217367
2017	600309	万华化学	21.55	37.94	43.48	22.61	0.76219	3.00943	8227816997	268535023813	225	103728445632	9.84468e+10	1.15182	1.13785
2018	600309	万华化学	40.08	27.99	53.3	27.1	-0.26226	1.85983	5084811533	211581051708	137	76525018272	76525018272	-0.234647	-0.22272
2015	600317	营口港	4.75	4.75	7.64	4.33	0	3.39728	21990520110	129851021679	244	3.07467e+10	3.07467e+10	0.001862	0.002105
2015	600332	白云山	29.82	30.27	47.21	24.72	0.11656	3.83834	4955600310	165119939850	235	3.9081e+10	3.80264e+10	0.126563	0.12689
2016	600332	白云山	30.05	23.98	27.87	20.24	-0.2078	1.15709	1881186878	46043641542	244	3.89865e+10	30960080415	-0.198484	-0.197886
2017	600332	白云山	24.01	32.14	32.2	23.82	0.34028	1.04911	1705631762	47559041193	200	5.22529e+10	41495287095	0.354265	0.35196
2018	600332	白云山	30.15	35.76	44.22	24.13	0.11263	1.97525	3211346296	113706869455	239	5.81383e+10	46168993980	0.123007	0.124487
2018	600339	中油工程	5.8	3.63	6.18	3.63	-0.37414	0.74851	4179045401	19463327335	243	2.02668e+10	5.63442e+09	-0.368888	-0.367759
2015	600340	华夏幸福	43.5	30.72	62.39	21.9	-0.29541	2.35439	6229150503	196514946379	230	8.12777e+10	8.12777e+10	0.425905	0.427523
2016	600340	华夏幸福	30.9	23.9	28.89	21.71	-0.22201	0.92465	2732290366	70674709989	244	7.06232e+10	63233650377	-0.204159	-0.204427
2017	600340	华夏幸福	23.9	31.39	44.39	23.83	0.31339	2.67133	7893632387	268637222439	241	9.27558e+10	9.27558e+10	0.338413	0.341004
2018	600340	华夏幸福	31.53	25.45	45.94	20.67	-0.18923	1.82456	5479598347	174498148376	243	7.64328e+10	7.52034e+10	-0.163311	-0.160561
2018	600346	恒力股份	12.28	13.25	17.42	12.49	0.07461	0.63967	3232137629	48755390610	243	6.69495e+10	1.21048e+10	0.091364	0.094891
2015	600352	浙江龙盛	20.19	11.64	42.28	9.43	-0.40854	6.34366	20638021269	380056995761	243	3.78688e+10	3.56176e+10	0.197706	0.208333
2016	600352	浙江龙盛	11.63	9.21	10.83	7.39	-0.20876	2.27308	7395077499	70407435437	230	2.99632e+10	2.8182e+10	-0.195307	-0.195876
2017	600352	浙江龙盛	9.21	11.71	12.16	9.11	0.27144	2.51523	8182884292	86720253288	244	3.80965e+10	3.58318e+10	0.298904	0.29316
2018	600352	浙江龙盛	11.91	9.65	13.41	8.26	-0.17592	3.62641	11797901758	136731759002	243	31394652449	31394652449	-0.159823	-0.154569
2015	600362	江西铜业	18.49	15.74	28.94	11.91	-0.14642	3.56396	12341021985	243384701397	244	5.45034e+10	5.45034e+10	-0.136137	-0.135575
2016	600362	江西铜业	15.71	16.73	21.2	12.09	0.0629	2.18801	7576490541	123096511974	236	5.79315e+10	5.79315e+10	0.069959	0.06925
2017	600362	江西铜业	17	20.17	21.49	14.69	0.20562	2.71486	9400818484	172898799681	244	6.98433e+10	6.98433e+10	0.216181	0.214585
2018	600362	江西铜业	20.25	13.16	22.14	12.61	-0.34755	1.64134	5683502227	100781035666	243	4.55695e+10	4.55695e+10	-0.339176	-0.33763
2015	600369	西南证券	22.33	9.9	27.26	7.36	-0.55585	3.69913	20882016685	341104686800	244	5.58866e+10	4.59866e+10	-0.098356	-0.09825
2016	600369	西南证券	9.83	7.13	9.3	7.06	-0.2798	1.77734	10033267197	79600695601	242	4.02496e+10	3.31196e+10	-0.267332	-0.266667
2017	600369	西南证券	7.12	4.63	7.16	4.5	-0.35063	0.976	5509614169	33238110450	244	2.61369e+10	2.61369e+10	-0.338781	-0.336606
2018	600369	西南证券	4.66	3.48	5.16	2.92	-0.24838	0.98596	5565850938	22670765533	243	1.9645e+10	1.9645e+10	-0.238332	-0.237581
2015	600372	中航电子	27.68	24.63	48.32	18.43	-0.11051	3.89176	6846243488	211939929130	239	4.33282e+10	4.33282e+10	-0.109004	-0.108704
2016	600372	中航电子	25.7	18.56	23.75	17.18	-0.24645	1.35054	2375813932	47169601947	244	3.26501e+10	3.26501e+10	-0.244647	-0.244417
2017	600372	中航电子	18.6	13.69	20.7	13.69	-0.26239	0.99587	1751895832	31072755159	239	2.40829e+10	2.40829e+10	-0.26021	-0.259698
2018	600372	中航电子	13.74	12.98	16.57	11.11	-0.05186	0.98147	1726587216	24469029401	243	2.28342e+10	2.28342e+10	-0.047507	-0.04748
2015	600373	中文传媒	13.33	23.49	37.61	13.34	0.76351	3.49637	4817788632	111160347672	244	3.23678e+10	2.78517e+10	0.773931	0.774775
2016	600373	中文传媒	23.36	20.2	24.19	16.8	-0.14006	1.24146	1710654393	36069919867	244	27834388505	2.55315e+10	-0.136552	-0.136654
2017	600373	中文传媒	20.3	16.93	25.94	16.81	-0.16188	1.48829	2050775345	45259573537	244	2.33285e+10	2.17055e+10	-0.157131	-0.155941
2016	600376	首开股份	12.46	11.81	13.84	8.33	-0.0552	1.95887	5053039965	56550577744	244	3.04647e+10	26478167625	-0.03641	-0.0352
2017	600376	首开股份	11.85	9.29	14.25	9.18	-0.21338	1.08765	2805651308	33651383672	244	2.39642e+10	2.36506e+10	-0.189165	-0.183743
2015	600383	金地集团	11.7	13.8	16.6	8.73	0.20947	3.15614	14201386109	172897873747	244	6.20946e+10	6.20946e+10	0.222622	0.220859
2016	600383	金地集团	13.65	12.96	16.19	9.54	-0.06087	1.62116	7296616447	91923239915	243	5.8331e+10	5.8331e+10	-0.020745	-0.030435
2017	600383	金地集团	12.99	12.63	13.25	10.57	-0.02546	1.22364	5524203987	65547696670	244	5.70192e+10	5.70192e+10	0.036893	0.028549
2018	600383	金地集团	12.86	9.62	17.41	7.72	-0.23832	1.63595	7385616521	91222752504	243	4.34303e+10	4.34303e+10	-0.192291	-0.196358
2017	600390	五矿资本	14.29	11.8	16.29	10.79	-0.17598	0.54508	2043171216	27704233907	237	4.4231e+10	5.32483e+09	-0.175978	-0.175978
2018	600390	五矿资本	11.79	6.96	12.39	6.55	-0.41017	0.3806	1426633418	13096436164	243	2.60888e+10	3.57422e+09	-0.394578	-0.39339
2015	600398	海澜之家	10.07	13.96	19.96	10.09	0.38218	1.04627	4700636195	72585340605	239	6.27189e+10	2.13758e+10	0.415045	0.419802
2017	600398	海澜之家	10.75	9.7	11.27	8.81	-0.10102	0.41263	1853851701	18353150240	244	4.35798e+10	4.35798e+10	-0.058086	-0.055607
2018	600398	海澜之家	9.68	8.48	14.54	7.69	-0.12577	0.82229	3694338865	42169647570	238	3.80986e+10	3.80986e+10	-0.093495	-0.076289
2015	600406	国电南瑞	14.58	16.68	29.29	12.45	0.14639	6.55114	15912407020	308251768470	244	4.05149e+10	3.6792e+10	0.152673	0.157388
2016	600406	国电南瑞	16.88	16.63	17.64	12.42	-0.003	2.38982	5804770091	86366286592	242	4.03935e+10	3.66817e+10	0.017061	0.013189
2017	600406	国电南瑞	17.5	18.28	21.1	16.17	0.09922	1.01821	4278492521	76487518447	137	7.6812e+10	4.03212e+10	0.118672	0.117258
2018	600406	国电南瑞	18.31	18.53	18.82	14.71	0.01368	0.69619	3191093811	54521801422	243	8.49353e+10	4.73109e+10	0.036772	0.03337
2015	600415	小商品城	12.6	9.19	28.55	7.18	-0.27581	5.05414	27510744358	382131620884	236	5.00231e+10	5.00231e+10	0.454158	0.457841
2016	600415	小商品城	9.18	8.65	8.93	5.67	-0.05876	1.8257	9937681305	74627587303	244	4.70838e+10	4.70838e+10	-0.051133	-0.053319
2017	600415	小商品城	8.63	5.78	8.67	5.73	-0.33179	0.86022	4682384340	34661265237	244	3.14618e+10	3.14618e+10	-0.326323	-0.324855
2018	600415	小商品城	5.79	3.49	6.07	3.42	-0.39619	0.43081	2344970176	11259445577	243	1.89968e+10	1.89968e+10	-0.384605	-0.38218
2017	600436	片仔癀	45.51	63.2	69.87	44.53	0.38021	1.94731	1174845470	67707419255	244	38129647672	38129647672	0.38682	0.386111
2018	600436	片仔癀	63.05	86.65	129.82	65.53	0.37104	2.22556	1342715979	125754805431	243	5.22774e+10	5.22774e+10	0.376229	0.377848
2018	600438	通威股份	12.2	8.28	13.21	5.04	-0.31627	2.11524	8212151061	72554084575	243	3.2146e+10	2.23956e+10	-0.307212	-0.303055
2016	600446	金证股份	44.27	25.13	44.27	23.99	-0.48912	7.96497	6650822132	216012012227	226	20983788735	1.8683e+10	-0.488137	-0.487965
2016	600482	中国动力	47.89	30.54	42.35	28.99	-0.3509	1.05472	1834353352	61561032913	239	5.31149e+10	16013404680	-0.350903	-0.350903
2017	600482	中国动力	30.6	24.81	38.64	24.26	-0.18762	1.34759	2336812910	67993173033	244	4.30223e+10	2.25499e+10	-0.181192	-0.180419
2018	600482	中国动力	24.99	22.27	26.14	16.46	-0.10238	0.73188	1256094314	27861025067	233	3.82212e+10	1.98447e+10	-0.092192	-0.093994
2015	600485	信威集团	43.28	26.75	64.31	17.13	-0.38293	1.8948	5539896353	157423891891	231	7.82101e+10	4.36411e+10	-0.382833	-0.382791
2016	600485	信威集团	28.1	14.6	27.92	14.6	-0.45421	2.49231	7286885836	135329138097	167	4.26866e+10	2.38191e+10	-0.453992	-0.453929
2018	600487	亨通光电	40.53	17.05	42.51	15.91	-0.57818	3.65877	6965152338	189553422278	243	3.24578e+10	3.17185e+10	-0.40639	-0.405492
2015	600489	中金黄金	10.61	9.93	16.76	8.22	-0.06497	6.78935	19982620384	245727108402	242	2.92263e+10	2.92263e+10	-0.064182	-0.06403
2016	600489	中金黄金	9.89	12.09	15.84	7.84	0.21752	5.0931	17576986204	216419948942	238	4.17242e+10	4.17242e+10	0.296244	0.288364
2017	600489	中金黄金	12.04	9.89	13.16	9.28	-0.18197	2.71446	9367984308	105633754352	244	3.41317e+10	3.41317e+10	-0.179114	-0.179074
2018	600489	中金黄金	9.96	8.58	10.27	6.42	-0.13246	2.15794	7447360910	62976059248	233	2.96108e+10	2.96108e+10	-0.128562	-0.129424
2016	600498	烽火通信	28.41	25.21	31.47	19.72	-0.11575	2.19296	2294433348	59474020939	242	2.63765e+10	2.51013e+10	-0.104318	-0.103823
2017	600498	烽火通信	25.1	28.83	37.25	21.53	0.14359	2.33556	2601674195	75316014301	244	3.21149e+10	2.93629e+10	0.159951	0.157081
2018	600498	烽火通信	28.85	28.47	32.33	22.52	-0.01249	3.38218	3952755809	110844681376	243	3.32729e+10	3.13846e+10	-0.001198	-0.000694
2017	600516	方大炭素	9.31	28.88	37.1	8.69	2.11879	12.0737	21597296455	521095144583	242	5.16604e+10	4.96494e+10	2.12525	2.12117
2018	600516	方大炭素	29.25	16.71	35.21	16.54	-0.4214	7.09827	12829362774	343217316894	243	3.02015e+10	2.96155e+10	-0.38044	-0.355609
2015	600518	康美药业	15.58	16.95	50.26	13.18	0.07824	4.88042	21461288140	498564467326	232	7.45364e+10	7.45364e+10	1.17124	1.17684
2016	600518	康美药业	16.85	17.85	18.29	12.56	0.0531	1.24135	6141248457	96579275340	242	8.83079e+10	7.84941e+10	0.066481	0.064307
2017	600518	康美药业	17.72	22.36	23.88	17.12	0.25266	0.82504	4103962854	84255138669	244	111224312173	9.84554e+10	0.264516	0.264146
2015	600519	贵州茅台	189.62	218.19	286.83	169.64	0.15067	1.06299	1335321132	297601049457	244	274089797982	274089797982	0.287783	0.288804
2016	600519	贵州茅台	218	334.15	337.76	196.64	0.53146	0.57718	725047968	200326967713	244	419758494870	419758494870	0.564488	0.559746
2017	600519	贵州茅台	334.28	697.49	719.11	334.56	1.08736	0.72876	915472397	459730037372	244	876185403522	876185403522	1.11912	1.10767
2018	600519	贵州茅台	700	590.01	799.19	524	-0.1541	0.86376	1085052044	743311671176	243	741169263978	741169263978	-0.142064	-0.138326
2017	600522	中天科技	10.54	13.94	15.81	10.45	0.32384	3.97161	12177229650	158374851533	244	4.27411e+10	3.17253e+10	0.335439	0.333333
2018	600522	中天科技	14.01	8.15	14.28	7.04	-0.41535	3.04843	9346705198	96169729199	243	2.49885e+10	2.49885e+10	-0.408545	-0.408178
2015	600535	天士力	40.94	40.92	56.91	31.88	-0.00438	2.51822	2720870961	122706807003	244	4.42131e+10	4.22639e+10	0.003544	0.005109
2016	600535	天士力	40.71	41.49	44.89	31.94	0.01393	1.01479	1096459403	42765153835	244	4.48289e+10	4.28526e+10	0.025864	0.024194
2017	600535	天士力	41.49	35.58	42.48	34.82	-0.14244	0.92898	1003735468	38839329770	244	3.84433e+10	3.67485e+10	-0.130436	-0.128947
2018	600535	天士力	35.62	19.2	46.96	18.88	-0.46037	1.20455	1822076688	56523124299	243	2.90432e+10	2.90432e+10	-0.237076	-0.233277
2015	600547	山东黄金	19.86	21	34.2	15.73	0.05793	7.34934	10458647458	253816812175	238	29884520568	29884520568	0.061389	0.062972
2016	600547	山东黄金	20.92	36.51	48.7	16.44	0.73857	5.08082	9435689434	324845747900	244	6.78034e+10	5.19564e+10	0.743078	0.743333
2017	600547	山东黄金	36.4	31.18	38.71	27.52	-0.14599	2.21174	4107465928	135325061942	215	5.7905e+10	4.52578e+10	-0.143102	-0.143248
2018	600547	山东黄金	31.46	30.25	33.82	21.6	-0.02983	2.10778	4666643717	129939426427	243	6.69738e+10	5.47038e+10	-0.025568	-0.025978
2016	600549	厦门钨业	18.82	22.02	31.51	12.79	0.17065	4.29994	4650701073	112039539908	244	23816259480	19522359480	0.178515	0.181287
2017	600549	厦门钨业	22.01	25.74	36.23	19.04	0.16894	5.21669	5668600654	157758708424	244	27969822738	27839714760	0.179816	0.17802
2018	600566	济川药业	38.2	33.53	54.03	33.53	-0.1211	1.29646	1056380254	45777410297	243	2.73208e+10	2.73208e+10	-0.103892	-0.094889
2015	600570	恒生电子	54.77	60.97	173.27	38.31	0.1134	11.1877	6911840223	548814743866	239	3.76676e+10	3.76676e+10	0.115044	0.116691
2016	600570	恒生电子	60.6	47.14	70.04	34.81	-0.22683	10.8055	6675675056	374592271837	244	2.91233e+10	2.91233e+10	-0.223257	-0.222568
2017	600570	恒生电子	47.5	46.4	57.49	36.06	-0.0157	5.87169	3627559318	170022650140	242	28666160352	28666160352	-0.013073	-0.013577
2018	600570	恒生电子	46.46	51.98	67.33	43.3	0.12026	6.11763	3779501828	204516259425	243	3.21135e+10	3.21135e+10	0.125369	0.126509
2015	600578	京能电力	6.31	6.07	9.39	5.05	-0.03956	2.74259	12663421809	90740066782	195	2.80271e+10	1.37019e+10	-0.008725	-0.007911
2015	600583	海油工程	10.57	8.95	17.09	8.2	-0.15005	6.48526	28673639571	364220471531	244	39571125460	36238677090	-0.136963	-0.128205
2016	600583	海油工程	9	7.38	8.54	6	-0.17542	1.60567	7099253867	51436513591	244	32629598424	32629598424	-0.146179	-0.147486
2017	600583	海油工程	7.43	6.15	8.19	5.93	-0.16667	1.13202	5005058980	34725293058	244	27191332020	27191332020	-0.15346	-0.153117
2018	600583	海油工程	6.18	4.9	7.35	4.89	-0.20325	1.19091	5265434686	32262551856	243	21664638520	21664638520	-0.1963	-0.195122
2015	600585	海螺水泥	22.5	17.1	28.31	15.53	-0.22554	2.89664	15350175348	340101356908	244	9.06181e+10	9.06181e+10	-0.20324	-0.196105
2016	600585	海螺水泥	17.09	16.96	18.77	12.87	-0.00819	0.83822	4441955605	71157948570	244	8.98762e+10	8.98762e+10	0.02172	0.016959
2017	600585	海螺水泥	16.95	29.33	31.56	17.32	0.72936	1.5023	7961142233	193974020899	244	1.55429e+11	1.55429e+11	0.770853	0.758844
2018	600585	海螺水泥	29.8	29.28	39.09	29.21	-0.0017	1.63169	8646808294	292826474195	243	1.55164e+11	1.55164e+11	0.032958	0.039209
2015	600588	用友网络	23.55	31.81	70.85	22.02	0.35419	7.33012	10698988994	424407427012	240	4.64296e+10	4.45848e+10	0.634837	0.637803
2016	600588	用友网络	31.75	20.82	28.63	16.27	-0.34549	3.11299	4558330115	97962885641	244	3.04866e+10	3.04048e+10	-0.340354	-0.340773
2017	600588	用友网络	21	21.15	26.26	14.36	0.01585	1.53962	2254337433	45998631166	242	3.09682e+10	3.0478e+10	0.02334	0.022094
2018	600588	用友网络	21.31	21.3	41.29	20.25	0.00709	3.37841	6472719004	186220534047	243	4.08088e+10	40465646706	0.314639	0.316312
2015	600600	青岛啤酒	41.72	33.2	57.38	29.54	-0.20536	1.36991	1850718888	77878986372	244	44852628794	44852628794	-0.195739	-0.194591
2016	600606	绿地控股	16.3	8.71	15.26	8.65	-0.46663	0.97531	11867754412	117894633082	244	1.05985e+11	2.80755e+10	-0.457025	-0.454378
2017	600606	绿地控股	8.7	7.3	8.88	6.98	-0.16188	1.15196	14017227621	110144844650	244	8.88275e+10	2.35306e+10	-0.134671	-0.13318
2018	600606	绿地控股	7.38	6.11	10.13	5.4	-0.16301	1.45362	17687930879	139514465908	243	7.43474e+10	7.43474e+10	-0.128768	-0.128767
2015	600637	东方明珠	37.7	37.89	77.23	25.02	0.00026	2.86564	7526701796	330009451042	230	9.95195e+10	5.98808e+10	0.002518	0.003168
2016	600637	东方明珠	38	23.3	34.97	23.03	-0.38506	1.07389	2820610231	73196119710	242	6.11983e+10	3.7323e+10	-0.379154	-0.378992
2017	600637	东方明珠	23.29	16.66	23.69	16.49	-0.28498	0.54395	1436699192	30175935200	237	4.40033e+10	2.66868e+10	-0.273341	-0.270386
2018	600637	东方明珠	16.67	10.24	18.8	8.33	-0.38535	0.53073	1822315749	25224149057	243	3.51604e+10	3.49645e+10	-0.180394	-0.179952
2015	600642	申能股份	6.48	7.55	13.99	5.76	0.16873	4.34442	19775966117	179565244144	244	3.43679e+10	3.43679e+10	0.194994	0.19969
2015	600648	外高桥	32.2	26.27	47.53	18.69	-0.18845	3.56467	4047143090	127481595868	240	2.75485e+10	2.75485e+10	-0.184051	-0.182576
2015	600649	城投控股	7.73	23.16	26.01	7.73	2.20332	2.85319	8523961640	128994042794	121	6.9191e+10	6.9191e+10	2.2862	2.23098
2016	600649	城投控股	20.84	20.34	21	12.49	-0.12176	1.65292	4938140087	79937183544	139	6.57413e+10	6.29141e+10	-0.121762	-0.121762
2015	600660	福耀玻璃	12.25	15.19	18.15	10.7	0.25124	3.21235	8058564978	120633529861	244	3.81059e+10	3.81059e+10	0.309486	0.313015
2016	600660	福耀玻璃	15.24	18.63	19.52	12.53	0.22646	1.06534	2672533939	42466293649	244	4.67355e+10	4.67355e+10	0.292403	0.275839
2017	600660	福耀玻璃	18.68	29	29.28	18.02	0.55663	1.36205	3416852797	80644131203	244	72749908428	72749908428	0.609147	0.596887
2018	600660	福耀玻璃	29.1	22.78	30	20.69	-0.21448	0.99018	2483972487	61940903285	243	5.71463e+10	5.71463e+10	-0.17665	-0.174828
2015	600663	陆家嘴	37.4	50.14	72.01	32.21	0.33707	2.1793	4070237829	190618179367	244	8.15658e+10	8.15658e+10	0.345948	0.348501
2016	600663	陆家嘴	49.64	22.13	50.94	21.89	-0.55864	0.37946	1275693189	37824350249	125	6.34136e+10	6.34136e+10	-0.196831	-0.195413
2017	600663	陆家嘴	22.15	19.03	24.98	18.8	-0.14008	0.30511	1025717333	23738553152	244	5.51867e+10	5.51867e+10	-0.125345	-0.122277
2018	600663	陆家嘴	19.11	12.99	21.32	12.26	-0.31739	0.19843	667085553	10969753722	243	3.97815e+10	3.97815e+10	-0.295872	-0.292906
2015	600674	川投能源	21.01	10.76	31.56	8.91	-0.48095	2.85251	12557146832	194667023853	244	4.7367e+10	4.7367e+10	0.049897	0.052581
2016	600674	川投能源	10.75	8.7	10.39	7.51	-0.19145	1.11655	4915198830	42771241980	244	38298622176	38298622176	-0.164924	-0.166357
2017	600674	川投能源	8.7	10.18	10.61	8.63	0.17011	0.84052	3700107374	35242214174	244	4.48138e+10	4.48138e+10	0.206304	0.204598
2018	600674	川投能源	10.22	8.67	10.58	7.83	-0.14833	0.51831	2281679895	20496298847	243	3.81666e+10	3.81666e+10	-0.119941	-0.121316
2017	600682	南京新百	37.27	37.79	39.92	34.02	0.01395	0.59569	662390949	24536109500	177	4.20215e+10	2.74295e+10	0.016545	0.016367
2016	600685	中船防务	42.5	29.7	41.41	23.21	-0.2517	1.17949	1667212920	49339456618	244	4.19811e+10	3.38998e+10	-0.25097	-0.250945
2015	600688	上海石化	4.34	6.48	11.91	3.88	0.49654	3.22896	34872732778	270083755393	244	69984000000	41601600000	0.496537	0.496536
2016	600688	上海石化	6.49	6.44	7.95	5.07	-0.00617	0.98365	10623453929	67692340942	244	69552000000	69552000000	0.009527	0.009259
2017	600688	上海石化	6.45	6.33	7.09	6.17	-0.01708	0.68017	7355476962	48512933765	244	68453737878	68453737878	0.020608	0.021739
2018	600688	上海石化	6.33	4.99	7.09	4.91	-0.21169	0.39249	4248249026	25802973239	243	54010829365	54010829365	-0.166299	-0.164297
2015	600690	青岛海尔	18.86	9.92	32.2	8.61	-0.46552	1.72861	10584532237	219554700050	189	6.07417e+10	5.46539e+10	0.087842	0.095474
2016	600690	青岛海尔	8.93	9.88	10.94	7.48	-0.00403	1.14841	7002590671	66208147427	224	6.02446e+10	5.40156e+10	0.016368	0.017339
2017	600690	青岛海尔	9.88	18.84	20.24	9.92	0.90688	1.85978	11339809746	167739259657	244	1.14875e+11	1.14875e+11	0.941051	0.931984
2018	600690	青岛海尔	18.95	13.85	22.87	12.16	-0.26486	1.59365	10149022284	183500359791	243	88202571295	88202571295	-0.252483	-0.246709
2015	600703	三安光电	14.22	24.28	33.89	14.65	0.70745	5.16518	13166114058	304184067661	228	6.18901e+10	5.75528e+10	0.719858	0.721519
2016	600703	三安光电	24.2	13.39	22.58	11.6	-0.44852	1.05037	4283865776	67748300140	243	5.46101e+10	5.41236e+10	-0.107047	-0.107331
2017	600703	三安光电	13.38	25.39	29.68	13.5	0.89619	1.79838	7334566785	152651689669	244	1.03551e+11	1.03551e+11	0.917177	0.911128
2018	600703	三安光电	25.61	11.31	27.14	11.31	-0.55455	2.36138	9630725638	190760233529	243	4.6127e+10	4.6127e+10	-0.548812	-0.544703
2016	600704	物产中大	17.7	10.33	15.86	8.98	-0.41373	2.22746	6395304087	72879544765	244	2.96587e+10	9.21226e+09	-0.222197	-0.223666
2017	600704	物产中大	10.38	6.82	11.43	6.69	-0.33979	1.44832	6237459345	55526533226	244	2.93716e+10	9.12308e+09	0.036944	0.038722
2018	600704	物产中大	6.84	4.58	7.42	4.06	-0.32845	0.59754	2573394764	15052500223	243	1.97246e+10	1.97246e+10	-0.306392	-0.29912
2015	600705	中航资本	18	15.58	32.98	13.4	-0.12912	7.01181	31470127330	681727878009	230	6.99256e+10	5.81554e+10	-0.126211	-0.12521
2016	600705	中航资本	15.7	6.12	14.74	5.64	-0.60719	2.332	20932778984	170141365087	244	5.49351e+10	4.66255e+10	-0.197547	-0.198267
2017	600705	中航资本	6.12	5.52	6.51	5.48	-0.09804	1.06145	9527935316	58326361822	244	4.95493e+10	4.20544e+10	-0.085626	-0.084641
2018	600705	中航资本	5.51	4.24	5.81	4.04	-0.23188	0.7352	6599410977	33263609846	243	3.80596e+10	3.80596e+10	-0.215825	-0.214855
2015	600718	东软集团	15.91	31.05	35.86	12.09	0.96395	10.0009	12426915089	280469155980	229	3.8582e+10	3.81168e+10	0.971044	0.967932
2016	600718	东软集团	31.09	19.66	27.95	15.76	-0.36683	5.98868	7445113267	141262537390	244	2.44413e+10	2.42207e+10	-0.363262	-0.363768
2016	600737	中粮糖业	14.52	12.46	13.48	9.71	-0.13772	4.58606	9410018967	111608884709	229	2.55664e+10	1.64804e+10	-0.135265	-0.135294
2015	600739	辽宁成大	21.51	22.6	36.21	15.83	0.05165	5.22371	7990758265	211283307741	136	3.45714e+10	3.08424e+10	0.057915	0.060959
2016	600739	辽宁成大	22.32	17.96	21.87	15.18	-0.20531	4.4999	6883540450	121882309490	227	2.74736e+10	2.45102e+10	-0.20531	-0.20531
2017	600739	辽宁成大	17.96	17.6	19.74	16.33	-0.02004	1.7225	2634924514	47791337784	237	2.69229e+10	2.40189e+10	-0.020045	-0.020045
2015	600741	华域汽车	15.6	16.86	25.22	11.9	0.08915	2.53961	6560311839	124536247472	216	4.35528e+10	4.35528e+10	0.11996	0.122739
2016	600741	华域汽车	16.86	15.95	17.26	12.73	-0.05397	0.90063	2839422647	43586898326	244	5.02859e+10	4.1202e+10	2.7e-05	-0.005931
2017	600741	华域汽车	15.95	29.69	29.69	15.62	0.86144	1.40411	4426763472	94975176655	244	9.36044e+10	8.51067e+10	0.943442	0.924138
2018	600741	华域汽车	29.69	18.4	28.58	16.91	-0.38026	0.90238	2844962377	66611227182	243	5.80101e+10	5.27438e+10	-0.351723	-0.344897
2018	600760	中航沈飞	35.27	27.71	40.63	22.86	-0.20579	1.89076	2647802291	91171917076	243	3.88048e+10	1.1043e+10	-0.20579	-0.20579
2015	600783	鲁信创投	27.92	39.07	59.17	17.87	0.39586	7.36216	5480093308	187409536783	243	2.90821e+10	2.90821e+10	0.404436	0.401215
2015	600795	国电电力	4.63	3.93	7.62	3.48	-0.15119	7.55473	148453472654	831749428531	244	7.72261e+10	7.00151e+10	-0.121647	-0.11879
2016	600795	国电电力	3.93	3.17	3.76	2.8	-0.19338	1.10775	21767654150	67496630745	244	6.22918e+10	6.22918e+10	-0.162789	-0.165394
2017	600795	国电电力	3.16	3.12	3.84	3.06	-0.01577	1.04388	20512681961	69290348802	180	6.13092e+10	6.13092e+10	0.012421	0.018927
2018	600795	国电电力	3.12	2.56	3.25	2.28	-0.17949	0.47674	9368218533	26119648846	243	5.0305e+10	5.0305e+10	-0.154143	-0.153846
2015	600804	鹏博士	18	23.72	47.41	17.33	0.31924	7.67384	10746859386	312330838809	210	3.32188e+10	3.22857e+10	0.324544	0.325918
2016	600804	鹏博士	23.75	21.93	23.88	16.04	-0.07546	3.11908	4410577230	88910446932	244	3.10104e+10	3.04741e+10	-0.067424	-0.068718
2017	600804	鹏博士	22.15	17.03	23.71	16.12	-0.22344	1.81503	2599951211	51027582220	239	2.43947e+10	2.43931e+10	-0.215888	-0.215914
2017	600809	山西汾酒	25.3	56.99	60.81	24.54	1.27778	2.42296	2097912972	82670572827	243	4.93447e+10	4.93447e+10	1.31581	1.29976
2018	600809	山西汾酒	56.51	35.05	67.11	31.46	-0.38498	1.67454	1449901822	74031118994	233	3.0348e+10	3.0348e+10	-0.377144	-0.374452
2016	600816	安信信托	22.75	23.62	24.44	14.36	0.03733	1.84599	3824240228	73974104061	244	4.89322e+10	2.68152e+10	0.058992	0.052701
2017	600816	安信信托	23.63	13.08	27.81	10.3	-0.44623	1.5208	6931205248	99889245151	244	5.96136e+10	3.26687e+10	0.245863	0.243692
2018	600816	安信信托	13.08	4.37	13.51	3.85	-0.6659	0.95386	5216810199	35333109639	243	2.39001e+10	2.04189e+10	-0.580965	-0.560856
2015	600820	隧道股份	8.23	10.64	21.77	7.27	0.28814	8.60489	27054604803	353092639716	244	3.34532e+10	3.34532e+10	0.307135	0.306295
2016	600820	隧道股份	10.58	11.01	11.19	7.41	0.03477	2.90243	9125518638	86452043289	244	3.46165e+10	3.46165e+10	0.053611	0.048872
2017	600820	隧道股份	11.07	8.36	12.08	8.15	-0.24069	1.86042	5849348860	60931736816	244	2.62846e+10	2.62846e+10	-0.227929	-0.226158
2015	600827	百联股份	17.8	17.87	26.36	14.42	-0.00112	4.65032	8010159289	158005004444	209	2.98486e+10	2.98486e+10	0.012974	0.012856
2016	600827	百联股份	17.97	14.36	16.99	11.9	-0.19642	1.67631	2990825799	40239155054	244	2.4804e+10	2.39184e+10	-0.196419	-0.196419
2015	600837	海通证券	24.19	15.82	30.22	11.28	-0.34248	5.28804	60821463223	1327695916205	243	181956894000	181956894000	-0.334909	-0.332086
2016	600837	海通证券	15.7	15.75	17.08	11.42	-0.00442	0.96065	11049064164	161051443552	244	181151775000	181151775000	0.023983	0.02402
2017	600837	海通证券	15.77	12.87	16.62	12.86	-0.18286	0.61379	7059592113	105289415378	244	148026879000	148026879000	-0.170768	-0.168889
2018	600837	海通证券	12.89	8.8	14.52	7.68	-0.31624	0.8996	10346924740	105899037854	243	101214960000	101214960000	-0.298862	-0.298368
2015	600839	四川长虹	4.66	5.79	14.7	4.62	0.24249	11.6897	53962271597	420137320139	240	2.67281e+10	2.66919e+10	0.242489	0.242489
2015	600863	内蒙华电	4.61	4.47	8.99	3.68	-0.01974	6.37562	37027952892	216447510606	244	25960620150	25960620150	0.008314	0.019737
2015	600867	通化东宝	15.6	27.17	34.02	15.57	0.74167	3.84965	4372548360	103465129947	215	3.08605e+10	3.07455e+10	0.92704	0.928654
2017	600867	通化东宝	21.95	22.89	23.99	16.55	0.04378	0.97232	1663927334	34289757811	232	3.91716e+10	37640867649	0.265143	0.261651
2018	600867	通化东宝	22.9	13.9	31.14	12	-0.39275	2.05632	4182527338	87252556387	243	2.82724e+10	2.7157e+10	-0.266678	-0.26256
2016	600871	*ST油服	8.19	4.1	7.4	3.73	-0.49755	1.04277	14747604494	68388655553	244	5.79849e+10	2.01652e+10	-0.497549	-0.497549
2015	600873	梅花生物	7.2	9.14	14.5	6.03	0.27654	8.23641	25600623528	242968913028	219	2.84092e+10	2.84092e+10	0.287227	0.290503
2015	600875	东方电气	20.35	13.63	32.43	11.6	-0.33963	7.12556	16651732579	355328940038	244	3.1852e+10	3.1852e+10	-0.334768	-0.335271
2015	600886	国投电力	11.47	8.35	15.16	8.35	-0.2701	5.71391	38774758045	433471841042	184	5.66633e+10	5.66633e+10	-0.254356	-0.244869
2016	600886	国投电力	8.34	6.67	7.93	5.98	-0.2012	1.89639	12868921603	87217015764	244	4.52628e+10	4.52628e+10	-0.166534	-0.167677
2017	600886	国投电力	6.68	7.34	8.32	6.7	0.10045	1.22413	8306975100	62363041311	244	4.98094e+10	4.98094e+10	0.12966	0.130735
2018	600886	国投电力	7.33	8.05	8.05	6.63	0.09673	0.63991	4342414197	31876872738	243	5.46275e+10	5.46275e+10	0.120945	0.119441
2015	600887	伊利股份	28.88	16.43	44.16	13.73	-0.42613	3.85086	23354725568	496909143049	244	9.96447e+10	9.77865e+10	0.169495	0.17569
2016	600887	伊利股份	16.34	17.6	20.1	12.84	0.07121	2.02771	12297660433	205814839907	224	1.0674e+11	1.06187e+11	0.10434	0.0986
2017	600887	伊利股份	17.6	32.19	33.29	17.41	0.82898	2.29587	13955440840	323463828803	240	1.95667e+11	1.94214e+11	0.892008	0.863068
2018	600887	伊利股份	32.41	22.88	35.46	21.04	-0.28922	2.43852	14821642692	412525518555	243	1.39068e+11	1.38043e+11	-0.272429	-0.267474
2015	600893	航发动力	28.92	45.03	79.73	28.34	0.5549	4.07052	7932308379	381080595393	240	8.77508e+10	6.14724e+10	0.559785	0.55991
2016	600893	航发动力	46.06	32.74	42.87	32.15	-0.27293	1.3205	2573288934	95273985209	224	63801051875	4.4772e+10	-0.269895	-0.269376
2017	600893	航发动力	32.75	26.91	37.92	23.95	-0.17807	0.92278	2076102583	63874838755	244	6.05433e+10	5.24133e+10	-0.174768	-0.173855
2018	600893	航发动力	27.1	21.72	28.82	20.7	-0.19287	0.98145	2208103521	55876698744	243	48866621454	42304620666	-0.18837	-0.188071
2015	600895	张江高科	13.41	28.83	38.52	12.93	1.16441	8.5728	13276601293	329674549488	241	4.46487e+10	4.46487e+10	1.17295	1.17117
2016	600895	张江高科	28.68	17.72	25.95	17.22	-0.38536	3.08368	4775668326	95668761512	244	27442778826	27442778826	-0.381276	-0.3812
2015	600900	长江电力	10.76	13.56	15.06	9.3	0.27085	0.74665	12319783585	151902486674	142	223740000000	1.32155e+11	0.307573	0.306382
2016	600900	长江电力	13.53	12.66	14.15	11.4	-0.06637	0.24121	5306609879	67847851132	238	278520000000	1.23384e+11	-0.040515	-0.040044
2017	600900	长江电力	12.68	15.59	17.16	12.61	0.23144	0.23656	5204418678	76745206418	244	342980000000	1.79378e+11	0.29057	0.287765
2018	600900	长江电力	15.69	15.88	17.69	14.22	0.0186	0.20361	4479337764	71627940718	243	349360000000	1.82714e+11	0.060302	0.062219
2017	600909	华安证券	12.64	7.27	12.83	7.11	-0.42072	3.03605	10993552196	120870032371	244	26324670000	19643540000	-0.416944	-0.415936
2017	600919	江苏银行	9.64	7.35	10.59	7.32	-0.23676	0.86532	9989613211	91395042551	244	84851707500	4.34447e+10	-0.222215	-0.218276
2018	600919	江苏银行	7.33	5.97	8.31	5.9	-0.18776	0.68529	7911343443	55659681118	243	68920366500	3.58691e+10	-0.16425	-0.163265
2017	600926	杭州银行	20.95	11.53	23.7	11.09	-0.44964	0.94439	3460640668	62360630177	244	4.22509e+10	1.6899e+10	-0.218806	-0.215179
2018	600926	杭州银行	11.62	7.4	12.95	7.31	-0.3582	0.73256	3758180071	37843215440	243	3.79635e+10	1.54042e+10	-0.075972	-0.075455
2015	600958	东方证券	12.04	23.29	40.97	14.44	1.32203	2.90177	15326378619	440151371177	194	1.23012e+11	23290000000
2016	600958	东方证券	23.17	15.53	22.79	15.38	-0.33319	1.24001	7707238477	138989591965	244	9.6526e+10	6.44997e+10	-0.319372	-0.318162
2017	600958	东方证券	15.56	13.86	16.93	13.49	-0.10753	0.88424	6184086350	97103372881	238	9.69321e+10	5.75638e+10	-0.099239	-0.097875
2018	600958	东方证券	13.91	7.97	15.34	7.65	-0.42496	0.53613	3749534450	40980686517	243	5.57394e+10	5.34344e+10	-0.411895	-0.410534
2015	600959	江苏有线	6.56	20.56	64.2	7.88	2.75868	2.80728	8388429468	244477190183	169	6.14353e+10	12274320000
2016	600959	江苏有线	20.4	11.3	18.51	10.16	-0.45039	0.82901	3220330014	41118723861	244	4.38952e+10	1.57768e+10	-0.285506	-0.285506
2017	600959	江苏有线	11.25	8.18	11.28	8.05	-0.27611	0.36081	1401576780	14767756795	167	3.17755e+10	1.14207e+10	-0.26931	-0.267257
2017	600977	中国电影	23.1	15.4	24.8	14.77	-0.33304	1.19528	2231578775	44557681003	244	28751800000	8701000000	-0.324871	-0.32382
2018	600977	中国电影	15.39	14.32	17.95	10.55	-0.07013	1.19093	2223469837	34899302183	243	26735440000	8090800000	-0.050055	-0.048961
2015	600998	九州通	17.78	19.6	33.87	15.43	0.08467	3.09766	5101877169	123864454154	241	3.22814e+10	2.8036e+10	0.084671	0.084671
2017	600998	九州通	20.8	18.95	22.21	18.42	-0.08631	0.4514	848118594	17172518570	244	3.56047e+10	3.11877e+10	-0.086307	-0.086307
2018	600998	九州通	18.95	14.6	20.22	14.13	-0.22955	0.43929	824835850	14047662017	243	2.74139e+10	2.42366e+10	-0.225012	-0.224274
2015	600999	招商证券	28.48	21.7	38.3	14.41	-0.2324	3.59906	20903823880	571948869140	238	1.26037e+11	1.04227e+11	-0.204267	-0.2052
2016	600999	招商证券	21.64	16.33	19.96	13.97	-0.24747	0.94939	6360378077	109742192977	244	1.09402e+11	9.29893e+10	-0.228528	-0.228986
2017	600999	招商证券	16.31	17.16	21.39	15.8	0.05083	0.67482	4520904048	82549308972	244	1.14962e+11	1.00971e+11	0.061984	0.0624
2018	600999	招商证券	17.18	13.4	20.64	11.35	-0.21911	0.47105	3155756757	49759451568	243	8.97721e+10	7.88469e+10	-0.198056	-0.198951
2015	601006	大秦铁路	11	8.62	14.32	8.09	-0.19137	2.41585	35915942431	417826724609	244	1.28152e+11	1.28152e+11	-0.160094	-0.146341
2019	600588	用友网络	21.46	28.4	37.8	21.7	0.33333	2.18664	5475133953	162315527199	244	7.11107e+10	7.07919e+10	0.748693	0.74507
2019	600600	青岛啤酒	34.91	51	55.19	33.09	0.46299	1.22909	1660479884	77963956355	244	68900122545	68900122545	0.479556	0.476764
2019	600606	绿地控股	6.13	6.95	8.15	6.04	0.13748	0.76017	9249872368	65788155165	244	8.45687e+10	8.45687e+10	0.189577	0.186579
2019	600637	东方明珠	10.28	9.36	13.65	8.6	-0.08594	1.03954	3549503185	39388753476	244	3.19597e+10	3.19597e+10	-0.061009	-0.05957
2019	600655	豫园股份	7.4	7.84	10.29	7.26	0.05946	0.62066	2410485046	20430117460	244	3.04487e+10	1.25675e+10	0.096132	0.095946
2019	600660	福耀玻璃	22.78	23.99	27.2	20.96	0.05312	1.17984	2959767683	69061219977	244	6.01817e+10	6.01817e+10	0.089297	0.08604
2019	600674	川投能源	8.67	9.85	10.17	8.28	0.1361	0.54759	2410568032	22534985642	244	43361083728	43361083728	0.174876	0.170704
2019	600690	海尔智家	13.94	19.5	19.9	13.26	0.40794	1.33278	8769119564	147004981953	244	1.28302e+11	1.28302e+11	0.440562	0.433285
2019	600703	三安光电	11.31	18.36	19.82	8.97	0.62334	6.25838	25524349046	350398782493	244	7.48799e+10	7.48799e+10	0.654144	0.641026
2019	600705	中航资本	4.26	4.85	6.94	4.2	0.14387	1.39116	12487539286	69988511747	244	4.35352e+10	4.35352e+10	0.152376	0.152358
2019	600741	华域汽车	18.45	25.99	26.6	17.3	0.4125	1.04969	3309390510	74990753698	244	8.19393e+10	8.19393e+10	0.481643	0.469565
2019	600760	中航沈飞	27.68	31.6	37.08	27.3	0.14038	1.61477	2261300311	71495484665	244	44252301406	12593298202	0.140382	0.140383
2019	600795	国电电力	2.55	2.34	2.86	2.2	-0.08594	0.67135	13192255960	33910945538	244	4.59819e+10	4.59819e+10	-0.071543	-0.070313
2019	600809	山西汾酒	35.44	89.7	98.7	33.08	1.5592	1.89572	1652174314	103955822015	244	7.81761e+10	7.76666e+10	1.58702	1.5806
2019	600837	海通证券	8.8	15.46	16.54	8.76	0.75682	2.04024	23466253379	323628991021	244	177816282000	177816282000	0.775898	0.773864
2019	600848	上海临港	20.37	24.55	37.49	19.82	0.18714	1.19021	2501905071	73225206915	243	5.00667e+10	2.04374e+10	0.191345	0.19294
2019	600867	通化东宝	13.99	12.65	19.25	11.2	-0.08993	3.37047	6855502643	104863545860	244	2.573e+10	2.573e+10	-0.076594	-0.07554
2019	600886	国投电力	8.05	9.18	9.9	7.26	0.14037	0.85199	5781647636	48996732478	244	6.22957e+10	6.22957e+10	0.170809	0.168323
2019	600887	伊利股份	23	30.94	34.47	22.3	0.35227	2.02691	12356826910	360206740372	244	1.88622e+11	1.8275e+11	0.385347	0.382867
2019	600893	航发动力	21.71	21.68	27.46	19.17	-0.00184	0.94339	2122476366	50485933645	234	48776627676	42226711604	0.004226	0.004696
2019	600900	长江电力	15.79	18.38	19.52	15.24	0.15743	0.22321	4910585418	85948578528	244	404360000000	404360000000	0.201846	0.200252
2019	600919	江苏银行	5.96	7.24	7.55	5.94	0.21273	0.78389	9049662778	63937542375	244	8.35822e+10	8.25778e+10	0.272835	0.269682
2019	600926	杭州银行	7.41	9.16	9.43	7.36	0.23784	1.10576	5672748032	48819072608	244	4.69926e+10	4.29254e+10	0.275576	0.271622
2019	600928	西安银行	5.62	7.77	12.67	6.5	0.66026	1.77042	7868528314	75875052761	207	3.45333e+10	3.45333e+09
2019	600958	东方证券	7.99	10.76	13.58	8	0.35006	1.27157	8892922432	97826445178	244	7.52517e+10	7.21398e+10	0.363454	0.36261
2019	600968	海油发展	2.45	2.93	4.6	2.72	0.43627	1.32588	13477749455	48656682328	129	2.97838e+10	5.46476e+09
2019	600977	中国电影	14.35	15.22	21.64	12.89	0.06285	1.61907	3022799133	48520873643	244	28415740000	28415740000	0.08403	0.082472
2019	600989	宝丰能源	13.34	9.51	16.85	8.74	-0.14478	0.6064	4446931462	54523907303	157	69740253600	6974253600
2019	600998	九州通	14.58	14.15	16.47	11.88	-0.03082	0.89668	1683658659	23383029466	244	2.65689e+10	23679392778	-0.022917	-0.023973
2019	600999	招商证券	13.38	18.29	19.27	13.31	0.36493	0.73049	4893822638	83668601075	244	1.22532e+11	1.22532e+11	0.386937	0.384627
2019	601006	大秦铁路	8.2	8.21	8.96	7.45	-0.00243	0.49625	7377701614	60655327622	244	1.22056e+11	1.22056e+11	0.056321	0.055893
2019	601009	南京银行	6.47	8.77	9.3	6.37	0.35759	1.63005	13826401378	113288594740	244	7.4389e+10	7.4389e+10	0.421779	0.418266
2019	601012	隆基股份	17.44	24.83	29	17.37	0.42374	2.38919	9012073736	222481053941	238	9.36592e+10	9.35483e+10	0.766501	0.719449
2019	601018	宁波港	3.34	3.8	5.43	3.32	0.13772	0.51945	6842672577	29785718373	244	5.00568e+10	48640000000	0.161032	0.165569
2019	601021	春秋航空	32.05	43.89	47.14	30.45	0.37975	0.99854	915389692	37580772319	244	4.02352e+10	4.02235e+10	0.386322	0.386042
2019	601066	中信建投	8.72	30.4	31.16	8.78	2.49024	1.84864	14135415073	313885308939	244	2.3245e+11	6.46121e+10	2.52737	2.51091
2019	601088	中国神华	17.93	18.25	21.22	16.9	0.01615	0.23006	4575768542	86610780059	244	3.62986e+11	3.62986e+11	0.063037	0.065145
2019	601108	财通证券	7.25	11.34	14.18	7.19	0.57064	5.51967	19810093245	218595043670	244	40699260000	2.72919e+10	0.580115	0.580332
2019	601111	中国国航	7.66	9.69	11.89	7.5	0.26832	0.78805	11446310779	104137893927	244	1.40745e+11	1.3577e+11	0.282722	0.281846
2019	601117	中国化学	5.38	6.44	6.94	5.32	0.20149	1.11852	5517647921	34055170951	244	31768520000	31768520000	0.225042	0.223507
2019	601138	工业富联	11.66	18.27	19.61	11.5	0.57636	0.6925	13749377679	206850781268	244	3.62748e+11	3.35951e+10	0.593375	0.587489
2019	601155	新城控股	23.88	38.72	46.67	23.6	0.63444	2.224	5018954049	158300237972	244	8.73804e+10	8.69789e+10	0.703583	0.697763
2019	601162	天风证券	6.24	7.36	12.43	5.32	0.18138	3.82766	19827289234	167325798318	244	38124800000	1.73145e+10	0.182219	0.182504
2019	601166	兴业银行	14.95	19.8	20.6	14.74	0.3253	0.89478	18588403996	343238922544	244	4.11329e+11	3.77236e+11	0.375795	0.371486
2019	601169	北京银行	5.62	5.68	6.65	5.22	0.01248	0.56853	12020449828	70545660468	244	1.20092e+11	1.03649e+11	0.064372	0.063458
2019	601186	中国铁建	10.89	10.14	12.18	8.98	-0.06716	1.23718	16800336463	178548377919	244	137696550810	137696550810	-0.047548	-0.047838
2019	601198	东兴证券	9.55	13.14	15.04	9.48	0.37448	2.27149	6264679136	77906199116	244	3.62396e+10	3.62396e+10	0.387431	0.385983
2019	601211	国泰君安	15.3	18.49	21.81	15.4	0.20692	1.03118	9185675733	169506779337	244	1.64708e+11	1.64708e+11	0.226817	0.224869
2019	601212	白银有色	2.95	3.68	5.52	2.92	0.24746	1.35365	10023507017	43625287273	244	2.72496e+10	7.23e+09	0.247458	0.247458
2019	601216	君正集团	2.62	3.13	4.37	2.6	0.19466	1.51381	12773591108	46282778415	244	2.6411e+10	2.6411e+10	0.194656	0.194656
2019	601225	陕西煤业	7.46	8.99	9.93	7.32	0.20833	0.84613	8461287498	74756605789	244	89900000000	89900000000	0.253645	0.252688
2019	601229	上海银行	11.1	9.49	12.89	8.79	-0.15192	0.50145	7123805320	76083838856	244	134819957363	1.25854e+11	0.14444	0.142717
2019	601231	环旭电子	8.9	19.23	24.3	8.63	1.13667	2.04455	4455261655	65444491925	237	4.19039e+10	4.19039e+10	1.16477	1.15489
2019	601236	红塔证券	4.15	16.77	19.37	4.98	3.84682	2.29471	8337597781	129009773604	122	6.09322e+10	6104280000
2019	601238	广汽集团	10.29	11.69	14.83	10.24	0.13605	0.30524	3124945592	37032367381	244	1.19679e+11	1.07349e+11	0.17059	0.168124
2019	601288	农业银行	3.61	3.69	3.89	3.38	0.025	0.17639	61733260754	225630401792	244	1.29144e+12	1198490291730	0.073834	0.073306
2019	601298	青岛港	5.53	6.87	11.07	6.38	0.49024	1.28406	8334971990	71105057566	231	44593857000	10671864870
2019	601318	中国平安	56.04	85.46	92.34	55.18	0.52335	0.85016	15541132916	1245790092443	244	1.56223e+12	1.56223e+12	0.558691	0.556328
2019	601319	中国人保	5.39	7.59	12.83	5.28	0.41078	0.43211	19109480639	160470035883	244	3.3566e+11	1.08748e+11	0.418383	0.419275
2019	601328	交通银行	5.77	5.63	6.73	5.41	-0.02763	0.29085	21599553449	129350645159	244	4.18099e+11	4.18099e+11	0.022922	0.02418
2019	601336	新华保险	42.31	49.15	64.43	39.15	0.16359	1.3328	4157728938	209593974697	244	153325715390	153325715390	0.181554	0.181818
2019	601360	三六零	20.4	23.51	28.6	17.11	0.15415	0.35479	2399848708	55808044311	244	1.59023e+11	9.33776e+09	0.157146	0.15675
2019	601377	兴业证券	4.54	7.08	8.07	4.49	0.52586	2.56512	17177783494	114139872282	244	4.74124e+10	4.74124e+10	0.538473	0.536638
2019	601390	中国中铁	7	5.94	7.64	5.5	-0.15021	0.52038	12786189996	86949952043	244	1.45951e+11	1.35695e+11	-0.133111	-0.131903
2019	601398	工商银行	5.3	5.88	6.01	5.2	0.11153	0.12484	44493941460	252427680250	244	2.09567e+12	2.09567e+12	0.160657	0.158904
2019	601555	东吴证券	6.72	9.99	12.29	6.75	0.49104	3.66884	11006506489	110242822027	244	29970000000	29970000000	0.504238	0.504478
2019	601577	长沙银行	8.54	9.07	12.82	8.44	0.06455	1.2886	4409014672	43872507668	244	3.10335e+10	9.02767e+09	0.096297	0.097418
2019	601600	中国铝业	3.53	3.54	4.69	3.27	-0.00282	0.97235	16551914111	65910808876	244	6.02603e+10	5.27594e+10	-0.002816	-0.002817
2019	601601	中国太保	28.45	37.84	40.02	27.33	0.33099	0.6284	5694561405	200223406565	244	342906080000	342906080000	0.366796	0.366163
2019	601607	上海医药	16.97	18.37	23.06	16.04	0.08059	1.16738	3317795560	63318137407	244	5.22092e+10	5.22077e+10	0.106152	0.104706
2019	601618	中国中冶	3.1	2.8	3.78	2.58	-0.09968	0.81729	16937177438	55020387720	244	58026133676	58026133676	-0.078532	-0.07717
2019	601628	中国人寿	20.4	34.87	35.8	19.95	0.71015	0.12842	3629739151	106068140643	244	985590263350	985590263350	0.71079	0.717999
2019	601633	长城汽车	5.62	8.85	10.55	5.58	0.58036	0.53563	4888813755	40915257244	244	80776330650	80776330650	0.635842	0.632143
2019	601668	中国建筑	5.67	5.62	6.68	4.95	-0.01404	0.85233	35777195959	210433606977	244	2.35903e+11	2.31213e+11	0.014872	0.015439
2019	601669	中国电建	4.86	4.34	6.18	4.03	-0.107	0.47886	7326121316	37685765866	244	6.63978e+10	4.83667e+10	-0.089493	-0.086872
2019	601688	华泰证券	16.2	20.31	24.63	16.22	0.2537	2.11501	19197233460	390993029496	244	184346761500	184346761500	0.273436	0.272222
2019	601698	中国卫通	3.26	11.32	15.31	3.92	3.16176	1.82424	7296963116	87834824769	127	45280000000	4528000000
2019	601727	上海电气	4.94	4.98	7.25	4.63	0.0081	0.37245	5643540834	32132624891	244	7.54593e+10	6.60185e+10	0.02075	0.020547
2019	601766	中国中车	8.98	7.14	9.72	6.82	-0.20843	0.45615	13091059285	111030001758	244	2.0491e+11	1.94842e+11	-0.19216	-0.191796
2019	601788	光大证券	8.8	13.1	14.57	8.75	0.49373	1.69587	7819306790	95586811898	244	6.04013e+10	6.04013e+10	0.506728	0.505131
2019	601800	中国交建	11.26	9.16	14.2	8.37	-0.1865	0.41144	6654985366	74503579327	244	148160576493	148160576493	-0.169812	-0.166004
2019	601808	中海油服	8.54	19.2	19.21	8.26	1.24824	0.4576	2183500853	26193954256	244	91614566400	91614566400	1.26537	1.25644
2019	601818	光大银行	3.69	4.41	4.67	3.65	0.19189	0.47564	24965846541	103022812355	244	2.31478e+11	2.05856e+11	0.241995	0.235405
2019	601828	美凯龙	11.04	11.33	13.9	10.44	0.02627	0.49446	1755327073	21197732619	244	40221500000	1.21195e+10	0.049074	0.050725
2019	601838	成都银行	8.05	9.07	9.62	7.69	0.12671	1.33102	4807990612	42064571802	244	3.27631e+10	1.71801e+10	0.173991	0.170186
2019	601857	中国石油	7.21	5.83	7.98	5.5	-0.1914	0.09732	17811279331	123053190919	244	1.06701e+12	1.06701e+12	-0.170657	-0.168141
2019	601872	招商轮船	3.77	8.26	8.26	3.65	1.23848	1.55057	9406723167	53588746641	244	5.01102e+10	4.37735e+10	1.2694	1.2542
2019	601877	正泰电器	24.23	26.8	29.19	20.9	0.10561	1.05171	2262470657	55917457835	244	5.76532e+10	5.76458e+10	0.134081	0.130363
2019	601878	浙商证券	7.29	11.13	12.83	7.17	0.53306	3.11059	10368661179	103740240852	244	3.71001e+10	1.34508e+10	0.545577	0.5427
2019	601881	中国银河	6.87	11.61	14.23	6.81	0.70235	1.35006	13685891036	154953686017	244	1.17694e+11	5.71156e+10	0.718305	0.715543
2019	601888	中国国旅	60.53	88.95	97.1	54.4	0.47757	1.1624	2269565280	175916099592	244	1.73673e+11	1.73673e+11	0.487078	0.486711
2019	601898	中煤能源	4.66	5.02	5.5	4.25	0.07957	0.28726	3808651264	18895247124	244	66558490268	66558490268	0.097563	0.096344
2019	601899	紫金矿业	3.29	4.59	4.59	2.95	0.37425	1.66621	42283740335	151600761651	240	1.16482e+11	1.1456e+11	0.412636	0.404192
2019	601901	方正证券	5.27	8.67	8.67	5.3	0.63277	1.35573	11160491694	81587775229	244	7.13723e+10	7.13723e+10	0.639369	0.637665
2019	601919	中远海控	4.02	5.27	6.32	4.08	0.30446	0.46717	5727248870	28897022401	244	6.46077e+10	5.38398e+10	0.304454	0.304455
2019	601933	永辉超市	7.9	7.54	10.61	7.18	-0.04193	1.13933	10903928218	96758236390	244	7.21613e+10	7.13906e+10	-0.031828	-0.027954
2019	601939	建设银行	6.37	7.23	7.76	6.25	0.13501	0.08661	21652953174	154864043627	244	1.80758e+12	1.80758e+12	0.184694	0.183046
2019	601985	中国核电	5.28	5	6.47	4.73	-0.05123	0.47016	7318290531	41913330957	244	77827233765	77827233765	-0.030457	-0.028463
2019	601988	中国银行	3.62	3.69	4.03	3.5	0.02216	0.10164	29922105361	111739434425	244	1.08629e+12	1.08629e+12	0.072992	0.07313
2019	601989	中国重工	4.25	5.24	6.75	4.26	0.23294	1.23104	28070275484	159750236636	244	1.19483e+11	9.58077e+10	0.234806	0.235059
2019	601992	金隅集团	3.6	3.73	4.63	3.14	0.06571	0.9731	10390545667	39555694052	244	3.98281e+10	3.981e+10	0.081344	0.081429
2019	601997	贵阳银行	10.7	9.56	15.07	8.03	-0.10487	1.33219	4287039515	48103860629	244	3.07644e+10	2.93477e+10	0.293368	0.290637
2019	601998	中信银行	5.45	6.17	6.95	5.33	0.13211	0.16557	8102083880	49604090535	244	3.01928e+11	2.88678e+11	0.178033	0.174312
2019	603019	中科曙光	35.88	34.58	66.04	30.91	-0.03623	6.70218	6034034625	249778196538	241	3.11327e+10	3.11327e+10	0.352546	0.353177
2019	603156	养元饮品	41.71	29.03	60.06	27.25	-0.30183	0.63701	671774539	25369259108	244	30614399340	1.85631e+10	0.036259	0.049591
2019	603160	汇顶科技	78.15	206.3	225.05	72.1	1.62135	1.67464	763187683	122317844095	244	9.40176e+10	9.25973e+10	1.63082	1.6277
2019	603259	药明康德	75.28	92.12	99.34	62.8	0.23056	0.97781	1614495040	135878856933	244	1.52102e+11	1.08387e+11	0.73329	0.730537
2019	603260	合盛硅业	43.8	29.47	63	27.12	-0.32717	0.68936	646618805	27253797647	244	27642860000	1.07618e+10	-0.041205	-0.039315
2019	603288	海天味业	68.19	107.51	115.7	65	0.56265	0.31772	857963644	82358693830	244	2.90317e+11	2.90317e+11	0.578916	0.57689
2019	603501	韦尔股份	29.52	143.4	162.99	28.16	3.87921	1.4112	1218800154	92402966724	243	1.23849e+11	2.01528e+10	3.89575	3.88533
2019	603799	华友钴业	30.08	39.39	43.16	20.31	0.3082	7.08706	7644610460	231247989306	234	4.24889e+10	4.24889e+10	0.706661	0.703985
2019	603833	欧派家居	79.75	117	126.2	75.88	0.46764	0.58012	243747645	26352579080	244	49159909305	11066609619	0.477643	0.477045
2019	603899	晨光文具	30.15	48.74	50.89	27.78	0.61124	0.9466	870871615	35046910227	244	44840800000	44840800000	0.624482	0.621157
2019	603986	兆易创新	62.49	204.89	214.92	58.48	2.28771	5.22373	1677212534	202556567190	243	6.57852e+10	5.79974e+10	2.30018	2.29228
2019	603993	洛阳钼业	3.78	4.36	5.15	3.37	0.15957	1.31447	28391541814	118248328053	244	9.41727e+10	9.41727e+10	0.191784	0.18883
2019	000001	平安银行	9.39	16.45	17.22	9.19	0.75373	1.28205	24879393091	344660388641	244	3.19227e+11	319224631586	0.772751	0.76919
2019	000002	万科A	23.83	32.18	33.48	23.9	0.35097	1.14198	12906869259	363695002490	244	3.63703e+11	3.63412e+11	0.404567	0.39484
2019	000063	中兴通讯	19.6	35.39	36.93	18.78	0.80653	6.034	25508895107	770816539532	244	1.49612e+11	1.49595e+11	0.806534	0.806534
2019	000069	华侨城A	6.32	7.79	8.99	5.97	0.22677	1.15448	9469656820	69097233769	244	6.38975e+10	5.46608e+10	0.279422	0.274016
2019	000100	TCL集团	2.46	4.47	4.69	2.51	0.82449	4.01663	54338712225	199853806794	244	6.04721e+10	5.65932e+10	0.872249	0.865306
2019	000157	中联重科	3.57	6.68	6.68	3.47	0.8764	1.46807	11551564172	62536449185	244	5.25618e+10	5.16969e+10	0.960774	0.946629
2019	000166	申万宏源	4.09	5.12	6.15	4.04	0.25799	0.66122	16556869596	86823896817	244	1.28205e+11	1.28197e+11	0.271719	0.27027
2019	000333	美的集团	37.2	58.25	59.84	36.2	0.5803	0.97774	6816737585	347954308786	233	4.06113e+11	3.96478e+11	0.621976	0.615681
2019	000338	潍柴动力	7.74	15.88	15.88	7.49	1.06234	1.91409	15186115915	179969062423	244	1.2599e+11	98266101005	1.13609	1.11818
2019	000425	徐工机械	3.25	5.47	5.48	3.2	0.6935	2.57473	20169550561	90388375873	244	4.28502e+10	3.82629e+10	0.71623	0.712074
2019	000538	云南白药	74.6	89.43	94.09	69.99	0.20917	0.93158	1189999206	98824814816	234	1.14238e+11	5.38504e+10	0.241624	0.23621
2019	000568	泸州老窖	40.98	86.68	98.07	38.13	1.13182	2.13952	3133869649	225599812321	244	1.26965e+11	1.26562e+11	1.16952	1.16995
2019	000596	古井贡酒	54.69	135.92	135.92	50.84	1.5189	1.45388	732172248	74747950162	244	5.97508e+10	5.97508e+10	1.55271	1.5467
2019	000625	长安汽车	6.6	10.03	10.32	6.32	0.522	1.65661	7956109189	65550882233	244	4.29213e+10	4.29211e+10	0.525555	0.524734
2019	000627	天茂集团	5.61	7.04	7.96	5.55	0.2549	0.76398	3774538022	26090641814	234	3.4782e+10	3.0294e+10	0.260311	0.26025
2019	000651	格力电器	36.45	65.58	65.58	35.8	0.83749	1.83136	11016971910	585949524111	238	3.94512e+11	3.91508e+11	0.916236	0.89633
2019	000656	金科股份	6.19	7.68	8.19	5.56	0.24071	1.09406	5841956783	39767652250	244	4.1009e+10	4.03041e+10	0.310609	0.298869
2019	000661	长春高新	176.01	447	494.04	167.92	1.55429	2.25578	456480012	153642598408	235	90454984815	75986432940	1.56116	1.55886
2019	000671	阳光城	5.2	8.5	8.69	5.15	0.63776	1.73502	7082336268	49243960766	244	3.4697e+10	34032396628	0.652708	0.648613
2019	000703	恒逸石化	11.51	13.92	17.46	11.1	0.20833	1.10578	3142309197	43096308985	244	3.95568e+10	3.17746e+10	0.236764	0.234375
2019	000709	河钢股份	2.87	2.58	3.72	2.36	-0.09155	0.90227	9580859782	29426825836	244	2.7396e+10	2.73916e+10	-0.058814	-0.055387
2019	000723	美锦能源	3.21	9.43	20.23	3.18	1.93769	6.9583	28523891812	308533808086	244	3.86561e+10	3.55886e+10	1.93769	1.93769
2019	000725	京东方A	2.64	4.54	4.83	2.56	0.72624	5.5173	191993221195	745324594529	244	1.56292e+11	1.56285e+11	0.741289	0.737643
2019	000728	国元证券	7.01	9.27	11.4	7.01	0.32808	2.16268	7278393372	68920357363	244	3.11977e+10	27310621392	0.365841	0.363897
2019	000768	中航飞机	13.32	16.38	18	13.25	0.23716	1.72985	4789332986	77584745497	244	4.53504e+10	4.53501e+10	0.245142	0.244713
2019	000776	广发证券	12.7	15.17	18.1	12.24	0.19637	1.40038	10672437318	158362484601	244	1.15612e+11	1.15612e+11	0.213426	0.212145
2019	000783	长江证券	5.16	7.14	8.24	5.11	0.38641	2.00684	11096942827	80254100803	244	3.94811e+10	3.94804e+10	0.389972	0.390291
2019	000786	北新建材	13.83	25.45	25.64	13.55	0.84956	1.64843	2785028663	52865927367	244	4.2998e+10	4.2998e+10	0.896413	0.882994
2019	000858	五粮液	51.6	133.01	141.89	48.96	1.61419	2.04543	7939553685	826726377060	244	5.16293e+11	5.04874e+11	1.65987	1.6476
2019	000876	新希望	7.28	19.95	23.2	7.4	1.74038	3.57878	15088179447	256699112466	244	8.41095e+10	8.37492e+10	1.74503	1.7445
2019	000895	双汇发展	23.85	29.03	33.47	21.57	0.23061	1.25837	4176886344	109392646809	229	9.63588e+10	2.5605e+10	0.25686	0.253921
2019	000938	紫光股份	31.45	31.6	48.25	25.55	0.01088	1.4783	3020031284	102077264969	244	6.45561e+10	6.45561e+10	0.420636	0.420026
2019	000961	中南建设	5.67	10.55	10.58	5.57	0.88057	1.8984	7132016596	60199868371	244	3.96348e+10	3.9509e+10	0.906657	0.901961
2019	000963	华东医药	26.54	24.38	37.3	22.52	-0.07861	2.30498	4033275537	116724193094	244	4.26604e+10	4.26597e+10	0.118018	0.118141
2019	000977	浪潮信息	15.92	30.1	33.2	15.53	0.8907	10.0456	12951282093	328769926694	244	3.88065e+10	3.88065e+10	0.895152	0.894472
2019	001979	招商蛇口	17.3	19.87	23.91	16.83	0.14524	0.55712	4410267419	91710985976	244	1.57295e+11	1.57286e+11	0.189302	0.190767
2019	002001	新和成	15.01	23.26	24.02	14.09	0.54963	2.58436	5552910136	111458117620	244	49977885098	4.93457e+10	0.604501	0.596269
2019	002007	华兰生物	32.6	35.15	46.46	27.4	0.07165	2.00492	2813026900	101131557512	244	49317524553	4.23069e+10	0.623112	0.619665
2019	002008	大族激光	30.54	40	44.59	24.93	0.31752	4.96041	5293101643	185190782053	244	42682770600	39735806240	0.32569	0.324111
2019	002024	苏宁易购	10.04	10.11	14.54	9.85	0.0264	1.09727	10215616371	117328166898	244	9.41245e+10	7.86072e+10	0.037285	0.038579
2019	002027	分众传媒	5.26	6.26	7.27	4.75	0.19466	2.23797	32848704106	199789340854	244	9.18835e+10	9.18835e+10	0.218937	0.21374
2019	002032	苏泊尔	53	76.78	80.36	48.07	0.46248	0.52609	431980577	29407891941	244	6.30456e+10	4.68928e+10	0.488815	0.486819
2019	002044	美年健康	14.89	14.89	19.32	9.85	-0.00401	1.37874	5404535065	77291207373	244	5.83676e+10	5.11069e+10	0.200563	0.198742
2019	002049	紫光国微	29.11	50.84	59.66	29.05	0.75917	9.0361	5483265957	252150153096	234	3.08506e+10	3.08209e+10	0.76143	0.761176
2019	002050	三花智控	12.68	17.33	17.66	9.72	0.36564	1.29196	3573128908	50011297960	244	4.79289e+10	4.19163e+10	0.806801	0.795035
2019	002120	韵达股份	30.3	33.3	40.8	28.83	0.09901	0.47357	1054306929	36079866247	244	7.41353e+10	71591825844	0.446249	0.444422
2019	002129	中环股份	7.34	11.81	13.27	7.04	0.63347	5.59274	15576659580	167217730763	244	3.28927e+10	3.16893e+10	0.638391	0.637621
2019	002142	宁波银行	16.22	28.15	29.05	15.99	0.73551	0.81645	4595235386	106833943114	244	1.58437e+11	1.58247e+11	0.766683	0.760173
2019	002146	荣盛发展	8.01	9.83	12.51	7.76	0.23648	1.6879	7339276649	70345764863	244	4.27425e+10	3.82738e+10	0.297221	0.293082
2019	002153	石基信息	26	39	43.33	25	0.50231	1.32033	1412226469	48542619836	244	41714564541	18993770640	0.507009	0.506159
2019	002179	中航光电	34.1	39.06	45.09	31	0.15974	1.60309	1715571212	66818990105	244	4.18005e+10	4.14964e+10	0.512279	0.51152
2019	002202	金风科技	9.98	11.95	16.05	9.34	0.1962	1.61826	6837265322	86643740711	238	5.04896e+10	4.9726e+10	0.341034	0.281415
2019	002230	科大讯飞	24.63	34.48	39.45	25.04	0.39935	4.29569	9444401804	314451377642	244	7.58069e+10	6.38125e+10	0.403387	0.403409
2019	002236	大华股份	11.55	19.88	19.93	11.11	0.73473	4.12493	12407743565	195384710866	242	5.97989e+10	3.60552e+10	0.744733	0.743455
2019	002241	歌尔股份	6.89	19.92	22.3	6.6	1.89535	4.87124	15807673788	216489131183	244	6.46425e+10	5.42003e+10	1.93087	1.90988
2019	002252	上海莱士	8.04	7.42	10.81	5.82	-0.07366	2.98882	14868237555	124649769964	239	3.69117e+10	3.68951e+10	-0.073658	-0.073658
2019	002271	东方雨虹	13	26.31	26.31	12.41	1.03166	2.61918	3896653714	81145385395	244	3.91423e+10	2.60629e+10	1.06309	1.05483
2019	002304	洋河股份	95.55	110.5	133.58	88.89	0.1666	1.165	1755638275	195588509304	244	166522174000	138007822927	0.19752	0.20038
2019	002311	海大集团	23.16	36	36.09	22.4	0.55373	1.11379	1760179266	52847026382	244	56892869784	55925730180	0.568787	0.566681
2019	002352	顺丰控股	32.5	37.19	43.32	28.51	0.13557	0.43415	1916582698	70414190366	244	1.64178e+11	6.06551e+10	0.14243	0.141985
2019	002410	广联达	20.91	33.98	38.19	20.4	0.63287	1.7824	2011492556	61795800446	244	3.83474e+10	3.03021e+10	0.644432	0.64248
2019	002415	海康威视	25.81	32.74	36.85	23.7	0.27096	1.35372	12650495789	384597784909	242	3.05956e+11	2.64156e+11	0.301873	0.294255
2019	002422	科伦药业	20.74	23.49	33	19.43	0.13753	1.97529	2843990705	76082280364	244	3.38206e+10	2.42752e+10	0.146503	0.14768
2019	002456	欧菲光	9.22	15.6	17.55	7.6	0.6975	11.9248	32350300527	370839771548	239	42320727150	4.1609e+10	0.697497	0.697497
2019	002460	赣锋锂业	22.12	34.83	35.24	19.44	0.57745	5.50179	7111623829	186113236231	244	4.50213e+10	3.43574e+10	0.598627	0.591033
2019	002466	天齐锂业	29.4	30.18	38.99	22.95	0.02933	3.82669	5652406972	168614078826	238	4.45789e+10	4.45789e+10	0.231911	0.229824
2019	002468	申通快递	16.3	19.5	30.23	16.06	0.18541	1.24056	1899045899	43428829048	244	29850642237	2.85012e+10	0.209681	0.215805
2019	002475	立讯精密	14.09	36.5	37.71	13.21	1.59602	2.39382	12843128716	332012285093	244	1.95827e+11	195782953637	2.38138	2.37838
2019	002493	荣盛石化	10.07	12.39	14.45	9.95	0.22795	0.24921	1567786992	18521863989	244	7.79468e+10	7.20631e+10	0.238416	0.237859
2019	002508	老板电器	20.18	33.81	34.99	19.81	0.67459	2.64293	2508202886	69959935793	244	3.20865e+10	3.1609e+10	0.725645	0.714215
2019	002555	三七互娱	9.62	26.93	27.76	9.02	1.85275	2.5391	5363211115	86769380154	244	5.68829e+10	3.54802e+10	1.91189	1.88453
2019	002558	巨人网络	19.7	18.06	25.38	17.34	-0.06763	0.88236	1786226353	35740242198	244	3.65603e+10	3.65603e+10	-0.058859	-0.058854
2019	002594	比亚迪	51.02	47.67	62.4	42.83	-0.06529	0.97267	2653588131	135929156386	244	1.30051e+11	9.80394e+10	-0.061973	-0.061294
2019	002601	龙蟒佰利	12.31	15.39	19.19	11.77	0.25122	1.36131	2766210850	40057969602	244	3.12728e+10	2.21642e+10	0.322737	0.320325
2019	002602	世纪华通	20.68	11.43	22.4	8.51	-0.44649	0.63584	3787312189	46711696265	243	6.8082e+10	2.96311e+10	-0.109338	-0.10954
2019	002607	中公教育	7.25	17.88	20.92	7.1	1.48333	0.62173	3834450387	48592062903	244	1.10273e+11	1.46676e+10	1.66878	1.56944
2019	002624	完美世界	27.84	44.14	44.39	23.05	0.58492	1.81882	2352043318	71976149673	244	5.70805e+10	5.12209e+10	0.596659	0.591382
2019	002673	西部证券	7.71	9.8	12.29	7.67	0.27771	2.75647	9652730352	100270645800	244	34318029746	34318029746	0.285321	0.285267
2019	002714	牧原股份	28.71	88.79	101.03	28.6	2.08835	1.89629	4099582226	279453144766	244	1.91955e+11	1.03617e+11	2.09096	2.09009
2019	002736	国信证券	8.37	12.55	14.94	8.3	0.4994	0.65781	5394056925	67815548910	244	102910000000	102910000000	0.514346	0.51374
2019	002739	万达电影	21.88	18.15	26.42	13.9	-0.16858	2.00277	4162623823	81660897871	243	3.77235e+10	3.19658e+10	-0.168575	-0.168575
2019	002773	康弘药业	34.23	36.97	56.81	30.1	0.08512	0.85753	750850596	28775965180	244	3.23708e+10	2.29677e+10	0.419514	0.418873
2019	002841	视源股份	57.15	85.7	96.54	55.03	0.50615	0.56096	367798883	29221305885	244	5.61902e+10	5.99801e+09	0.51695	0.515659
2019	002916	深南电路	80.33	142.1	164.91	75.15	0.77248	3.39	1150431885	139370496708	244	48223056000	1.40282e+10	1.14207	1.13634
2019	002938	鹏鼎控股	17.62	44.9	52.68	16.72	1.56279	1.14923	2656369401	82181399764	244	1.03783e+11	1.03783e+10	1.61337	1.59132
2019	002939	长城证券	9.94	13.86	18.36	9.56	0.39859	3.65345	11338121548	159482506303	244	4.30132e+10	2.30655e+10	0.417525	0.418769
2019	002945	华林证券	4.34	14.94	21.45	5.21	3.12707	3.85959	10420881203	153756897271	233	40338000000	4033800000
2019	002958	青农商行	4.75	6.47	10.45	5.7	0.63384	1.53856	8547569358	66986959745	190	3.59444e+10	3.59444e+09
2019	300003	乐普医疗	20.68	33.08	36.68	18.1	0.58962	3.10178	5526298863	144839529982	244	5.89371e+10	5.01245e+10	0.601361	0.597549
2019	300015	爱尔眼科	26.01	39.56	47.75	24.62	0.50418	1.10618	3426731824	119249941440	239	1.22549e+11	9.95128e+10	0.966241	0.963042
2019	300033	同花顺	38.2	109.11	130.99	38.22	1.85628	5.23533	2814515505	263314733325	244	58657536000	2.8838e+10	1.87001	1.86885
2019	300059	东方财富	12.1	15.77	22.22	11.85	0.30331	7.29702	49003912045	785001691890	244	1.05905e+11	8.58847e+10	0.566032	0.56562
2019	300122	智飞生物	38.74	49.66	52.83	34.3	0.28122	1.67038	2672609911	120189934270	244	79456000000	4.34907e+10	0.296709	0.294118
2019	300124	汇川技术	20.2	30.64	30.85	19.98	0.52135	1.28782	2231580162	56520397033	233	5.30942e+10	4.15155e+10	0.534124	0.531281
2019	300136	信维通信	21.88	45.38	46.02	19.5	1.09995	10.8804	10539161659	320902375868	244	4.39569e+10	3.68133e+10	1.09995	1.09995
2019	300142	沃森生物	18.82	32.44	32.83	17.92	0.69843	2.38686	3669652302	98245255433	244	4.98745e+10	4.71838e+10	0.700322	0.7
2019	300144	宋城演艺	21.35	30.91	31.26	18.9	0.44778	1.4662	2129807374	51104703798	244	44900107098	3.67424e+10	0.455766	0.453396
2019	300347	泰格医药	43.24	63.15	77.64	38.5	0.47719	1.7534	1314275616	79012965107	244	4.73345e+10	3.33251e+10	1.22583	1.22398
2019	300408	三环集团	17	22.28	23.84	14.95	0.31678	1.54136	2686843153	53348387870	244	3.88377e+10	3.67896e+10	0.33352	0.33156
2019	300413	芒果超媒	36.88	34.96	50.6	25.71	-0.05539	0.74565	1327533752	49244610232	244	6.2242e+10	2.91573e+10	0.605836	0.605836
2019	300433	蓝思科技	6.52	13.82	15	5.83	1.12289	2.66514	11329571407	119910284714	244	5.87491e+10	5.85313e+10	1.13078	1.12673
2019	300498	温氏股份	26.15	33.6	45.32	26.15	0.28342	1.41555	7519552031	281849905731	244	1.78487e+11	134720276544	0.309888	0.31398
2019	600000	浦发银行	9.74	12.37	13.17	9.7	0.26224	0.32406	9511829232	111746204957	244	3.63085e+11	3.47644e+11	0.30093	0.297959
2019	600004	白云机场	10.05	17.45	23.5	9.57	0.73632	1.96065	4057204138	64553932444	244	3.61096e+10	3.61096e+10	0.753438	0.753234
2019	600009	上海机场	50.6	78.75	87.5	47.33	0.55142	1.0269	1978786051	142101250566	244	151747977780	8.61113e+10	0.563359	0.564421
2019	600010	包钢股份	1.48	1.32	2.07	1.22	-0.10811	1.41206	64368865184	107964911356	244	6.01722e+10	4.18139e+10	-0.104231	-0.103378
2019	600011	华能国际	7.35	5.58	7.31	5.44	-0.2439	0.38047	5972730966	38510208344	244	8.75954e+10	8.75954e+10	-0.231766	-0.230352
2019	600015	华夏银行	7.4	7.67	8.75	7.21	0.03789	0.40919	6296274227	49919600901	244	1.1802e+11	9.835e+10	0.062032	0.061434
2019	600016	民生银行	5.72	6.31	6.75	5.65	0.10122	0.46723	20456504642	127726637766	244	2.76267e+11	2.76267e+11	0.163605	0.161431
2019	600018	上港集团	5.16	5.77	8.93	5.13	0.1139	0.44176	10237175878	71216140571	244	1.33712e+11	1.33712e+11	0.13905	0.143629
2019	600019	宝钢股份	6.46	5.74	7.98	5.27	-0.11692	0.53662	11953010081	77745322269	244	1.27855e+11	1.2686e+11	-0.046839	-0.04
2019	600025	华能水电	3.15	4.22	4.85	3.13	0.33968	0.49242	8863537104	36855702242	244	75960000000	37676160000	0.397144	0.39619
2019	600027	华电国际	4.8	3.67	4.78	3.49	-0.22737	0.83507	8236294479	33801462982	244	3.61971e+10	3.19766e+10	-0.214158	-0.213474
2019	600028	中国石化	5.1	5.11	6.13	4.85	0.01188	0.18905	22888236366	125657295281	244	6.18674e+11	6.18674e+11	0.086206	0.087129
2019	600029	南方航空	6.66	7.18	9.65	6.49	0.08133	0.98127	12037443512	91280047894	244	8.80783e+10	8.02512e+10	0.088622	0.088855
2019	600030	中信证券	17.15	25.3	26.76	16.8	0.58026	2.9793	36099965560	827731104584	237	306557782520	305952631820	0.605738	0.602124
2019	600031	三一重工	8.31	17.05	17.05	7.93	1.04436	2.48752	20960484837	270282166347	244	1.43667e+11	1.4358e+11	1.08391	1.07554
2019	600036	招商银行	25.15	37.58	38.38	24.57	0.49127	0.48125	12137131614	414438763675	244	9.47762e+11	9.47762e+11	0.530868	0.528571
2019	600038	中直股份	37.51	47.71	50.96	37.5	0.27703	2.29815	1354706135	61015134347	244	2.81239e+10	2.81239e+10	0.284965	0.283994
2019	600048	保利地产	11.74	16.18	16.27	11.68	0.37235	1.66894	19914881711	276373911677	244	1.93071e+11	1.93071e+11	0.427774	0.414758
2019	600050	中国联通	5.17	5.89	7.5	5.15	0.13926	1.23167	38223254800	241105758826	244	1.82789e+11	1.24848e+11	0.149043	0.149574
2019	600061	国投资本	9.01	15.14	15.86	8.81	0.68409	1.1123	4701822571	62040149333	244	6.39987e+10	6.31918e+10	0.693546	0.693103
2019	600066	宇通客车	11.88	14.25	16.6	11.57	0.20253	1.90018	4206883209	59147627008	244	3.15486e+10	3.15486e+10	0.247235	0.244726
2019	600068	葛洲坝	6.32	6.68	7.81	5.4	0.05696	1.83584	8453615963	55945516456	244	3.07599e+10	3.07599e+10	0.091179	0.085443
2019	600085	同仁堂	27.53	28.18	33.14	25.56	0.02473	1.07718	1477322567	42720186552	244	3.8648e+10	3.8648e+10	0.054506	0.052364
2019	600089	特变电工	6.82	6.65	8.74	6.31	-0.02062	1.5822	5876770504	44821985835	244	2.47002e+10	2.47002e+10	0.004141	0.005891
2019	600104	上汽集团	26.38	23.85	30.22	22.5	-0.10574	0.57905	6765303390	173764196531	244	2.78651e+11	2.74357e+11	-0.058592	-0.058493
2019	600109	国金证券	7.16	9.3	12.43	7.16	0.29888	3.02536	9149787571	89697506381	244	28126541583	28126541583	0.304579	0.304469
2019	600111	北方稀土	8.79	10.84	14.32	8.55	0.23603	4.18182	15192823431	177608554624	244	39382435440	39382435440	0.240686	0.241733
2019	600115	东方航空	4.76	5.81	8.24	4.73	0.22316	0.66811	10943340888	65332949292	244	9.51649e+10	8.40567e+10	0.223158	0.223158
2019	600118	中国卫星	17.44	21.37	26.95	17.8	0.23383	2.28784	2705347792	62058914004	244	2.52698e+10	2.52698e+10	0.239579	0.240185
2019	600150	中国船舶	13.13	21.76	31.46	12.39	0.65727	3.31092	4562836430	102480241301	233	2.99878e+10	2.99878e+10	0.666372	0.665423
2019	600170	上海建工	3.04	3.54	4.14	3.05	0.16832	0.91762	8170817667	30030250097	244	3.15216e+10	3.00437e+10	0.210601	0.212871
2019	600176	中国巨石	9.65	10.9	12.35	7.93	0.1272	2.26486	7932249600	80063865379	244	3.81751e+10	3.81751e+10	0.153922	0.150465
2019	600177	雅戈尔	7.18	6.97	9.62	6.13	-0.0306	0.7777	3899385912	30067980703	244	3.49478e+10	3.49478e+10	0.433373	0.426704
2019	600183	生益科技	10	20.92	29.98	9.71	1.07952	4.57222	10407239205	206566172663	244	4.76179e+10	4.76179e+10	1.13599	1.11431
2019	600188	兖州煤业	8.83	10.56	12.42	8.52	0.20273	1.0389	5103094123	53091774577	244	51870888960	51869616480	0.403486	0.378132
2019	600196	复星医药	23.42	26.6	31.75	20.99	0.1431	2.03182	5207354177	139831678482	244	68173101297	68173101297	0.157792	0.156854
2019	600208	新湖中宝	2.9	3.78	4.89	2.82	0.30345	2.44944	21063608030	81526051838	243	3.25055e+10	3.25011e+10	0.329083	0.323793
2019	600219	南山铝业	2.12	2.24	2.93	2.07	0.06161	1.32748	15864055693	38270189599	244	2.67691e+10	2.19236e+10	0.085098	0.085308
2019	600221	海航控股	1.88	1.73	2.46	1.64	-0.07979	1.08266	18195339836	37623518835	244	2.91391e+10	2.91379e+10	-0.079787	-0.079787
2019	600233	圆通速递	10.07	12.65	14.58	9.81	0.265	0.57096	1623189564	20310554686	244	3.59631e+10	3.58724e+10	0.280799	0.28
2019	600271	航天信息	23.03	23.17	30.75	20.18	0.01223	2.32274	4326149276	107554903572	244	43154616204	4.29294e+10	0.031314	0.031455
2019	600276	恒瑞医药	53.29	87.52	95.63	51.07	0.65915	1.0588	4682896708	335432781913	244	3.87085e+11	3.85431e+11	0.996621	0.995147
2019	600297	广汇汽车	4.1	3.26	5.95	3.23	-0.19704	0.58609	4782509575	21853367923	244	26601532681	26439583705	-0.194164	-0.19335
2019	600299	安迪苏	11.4	11.06	15.21	9.9	-0.03659	0.68388	1834103790	21488539351	244	2.96618e+10	2.96618e+10	-0.011446	-0.012544
2019	600309	万华化学	28.36	56.17	56.17	27.55	1.00679	1.76953	5555860442	234163200659	244	1.7636e+11	7.99724e+10	1.1109	1.07824
2019	600332	白云山	35.73	35.61	45.49	32.62	-0.00419	1.60884	2615630208	100051948076	244	5.78944e+10	5.78944e+10	0.006347	0.007662
2019	600340	华夏幸福	25.58	28.7	34.51	25.05	0.1277	1.0489	3160643423	93689896246	244	8.64813e+10	8.55037e+10	0.172216	0.174853
2019	600346	恒力石化	13.28	16.08	19.65	10.91	0.21358	0.55621	3915192245	59546113374	244	1.13189e+11	7.33168e+10	0.728983	0.72166
2019	600352	浙江龙盛	9.66	14.47	25.3	8.9	0.49948	7.31181	23787738035	408981422835	244	4.70757e+10	4.70757e+10	0.52342	0.525389
2019	600362	江西铜业	13.15	16.93	17.29	12.97	0.28647	1.35362	4687232017	71943071127	244	5.8624e+10	5.8624e+10	0.303823	0.301672
2019	600369	西南证券	3.5	5.19	6.27	3.53	0.49138	2.37457	13404726396	68364712386	244	2.92981e+10	2.92981e+10	0.501233	0.5
2019	600372	中航电子	13.01	14.24	17.97	13.01	0.09707	1.05212	1851235960	28408495982	244	2.50556e+10	2.50556e+10	0.10071	0.100924
2019	600383	金地集团	9.6	14.5	14.77	9.4	0.50728	1.49895	6767151584	83101394044	244	65461461794	65461461794	0.579108	0.569647
2019	600390	五矿资本	6.94	8.26	11.47	6.91	0.18678	0.73598	3310494948	31026183105	244	3.7154e+10	5.09019e+09	0.45274	0.450144
2019	600398	海澜之家	8.49	7.68	10.33	7.44	-0.09434	0.54662	2416073115	21260802540	244	3.39457e+10	3.39457e+10	-0.055628	-0.049528
2019	600406	国电南瑞	18.54	21.18	24.18	17.23	0.14301	0.98009	4530067251	92664842897	244	9.78964e+10	6.21612e+10	0.166389	0.162979
2019	600436	片仔癀	86.6	109.87	122.5	80.99	0.26797	1.67035	1007750564	106051584367	244	6.62865e+10	6.62865e+10	0.274572	0.274899
2019	600438	通威股份	8.3	13.13	16.55	7.94	0.58575	2.25899	8770728173	114513740267	244	5.09785e+10	5.09785e+10	0.603091	0.605072
2019	600482	中国动力	21.91	20	28.99	19.23	-0.10193	0.65716	1113886574	26831601546	243	33899919240	17396571360	-0.101931	-0.101931
2019	600487	亨通光电	17.2	16.26	23.46	14.05	-0.04633	4.73433	9012712097	166619432370	233	3.09541e+10	3.0249e+10	-0.037686	-0.037537
2019	600489	中金黄金	8.5	8.48	10.45	7.74	-0.01166	3.12989	10801695687	97853163925	243	2.92656e+10	2.92656e+10	-0.009541	-0.009324
2019	600498	烽火通信	28.33	27.45	34.44	24.38	-0.03583	4.04969	4742125683	139996517875	244	3.21435e+10	3.03855e+10	-0.023518	-0.023885
2019	600516	方大炭素	16.75	12.16	29.6	10.23	-0.27229	4.66566	12683821203	217520579016	244	3.30576e+10	3.30576e+10	0.084284	0.084285
2019	600519	贵州茅台	609.98	1183	1233.75	590	1.00505	0.77284	970844096	913199278464	244	1486081997400	1486081997400	1.03468	1.02969
2019	600522	中天科技	8.15	8.3	11.4	7.82	0.0184	3.65421	11204105945	104934330227	244	25448482509	25448482509	0.029784	0.030675
2019	600547	山东黄金	30.06	32.62	51.25	28.42	0.07835	2.64603	8201650009	288981795031	244	1.01109e+11	8.79481e+10	0.512553	0.512992
2019	600570	恒生电子	51.75	77.73	100.08	50.53	0.49538	5.45112	4378048251	334370549695	244	6.24286e+10	6.24286e+10	0.951182	0.950154
2019	600583	海油工程	4.92	7.38	7.38	4.85	0.50612	0.8998	3978327663	23715797476	244	32629598424	32629598424	0.519788	0.516327
2019	600585	海螺水泥	29.3	54.8	54.8	28.23	0.87158	1.12793	5977230216	237962581805	244	2.90402e+11	2.90402e+11	0.931286	0.929303
2015	000539	粤电力A	7.91	7.35	14.53	5.97	-0.0625	1.25051	6565521468	58332268249	214	3.61394e+10	2.21893e+10	0.142441	0.15051
2015	000598	兴蓉环境	7.62	7.12	12.65	5.44	-0.06806	8.92528	26652828085	232793821045	244	2.12619e+10	2.12619e+10	-0.065613	-0.064791
2015	000629	*ST钒钛	3.6	3.67	6.61	2.86	0.02228	5.44208	46746079746	200679067703	233	3.15244e+10	1.7496e+10	0.022284	0.022284
2015	000831	五矿稀土	29.8	20.7	39.9	13.6	-0.30977	11.8441	11617757626	312389068631	241	2.03044e+10	1.5426e+10	-0.30977	-0.30977
2015	000878	云南铜业	14.28	13.85	24.5	9.9	-0.03011	7.21304	10216541270	144942695458	181	19617123380	1.9617e+10	-0.030112	-0.030112
2015	000937	冀中能源	8.35	5.04	12.67	4.74	-0.39568	3.30604	11682058335	90277025957	244	17809076124	1.44607e+10	-0.208007	-0.202398
2015	000960	锡业股份	17.86	13.46	29.35	9.51	-0.22644	5.74935	8463361295	150555890165	236	1.98139e+10	1.54954e+10	-0.226437	-0.226437
2015	000970	中科三环	14.81	14.03	30.8	10.96	-0.05139	9.0825	9674674536	181656048576	239	14944756000	14944756000	-0.048697	-0.045639
2015	002051	中工国际	27.6	25.33	40.7	16.5	-0.07284	5.34805	4136282975	121754919721	244	1.95907e+10	1.93657e+10	-0.065142	-0.061856
2015	600108	亚盛集团	9.34	7.34	14.06	5.51	-0.21413	15.4058	29993869039	288521560385	244	1.42904e+10	1.42904e+10	-0.21257	-0.212527
2015	600166	福田汽车	6.25	6.33	12.03	5.31	0.01118	5.77021	19244037896	148637098524	244	2.1111e+10	17785221228	0.017604	0.018051
2015	600277	亿利洁能	8.95	9.07	14.62	8.05	0.01682	3.64013	7606379203	80603628903	157	18952576765	18952576765	0.019761	0.021076
2015	600315	上海家化	35.65	39.49	52.06	31.87	0.15064	3.99852	2695129320	112852541891	201	2.66175e+10	2.65007e+10	0.166746	0.168415
2015	600316	洪都航空	28.12	23.34	51.7	16.58	-0.16553	8.8671	6358729441	197577826002	244	1.67375e+10	1.67375e+10	-0.165159	-0.165177
2015	600348	阳泉煤业	9.08	6.46	13.08	5.71	-0.2717	5.02105	12075635526	109589062473	244	15536300000	15536300000	-0.271702	-0.271702
2015	600350	山东高速	5.05	7.11	11.58	4.48	0.41071	1.73811	8362327097	63043749637	244	3.42074e+10	3.42074e+10	0.445401	0.449206
2015	600497	驰宏锌锗	11.67	11.04	19.79	8.16	-0.0491	6.48418	10812767589	140532979821	237	1.84099e+10	1.84099e+10	-0.034571	-0.036176
2015	600516	方大炭素	10	12.51	17.01	6.73	0.28045	9.68064	16642579349	195635778072	198	2.15067e+10	2.15067e+10	0.28045	0.28045
2015	600549	厦门钨业	32.9	18.81	43.58	14.34	-0.42965	4.63562	5013761585	134202033916	244	20344406940	16676456940	-0.254802	-0.252486
2015	600597	光明乳业	17.54	15.92	28.64	14.49	-0.0882	2.85207	3509867439	66272398426	170	1.95917e+10	1.94909e+10	-0.076338	-0.072165
2015	600633	浙数文化	18.01	18.83	30.22	13.56	0.03518	5.6433	6705860059	150500193261	159	2.23755e+10	2.13546e+10	0.043833	0.047279
2015	600717	天津港	17.14	11.27	22.46	8.88	-0.34209	6.02326	10087569891	166284918360	244	1.88746e+10	1.88746e+10	-0.334378	-0.330006
2015	600809	山西汾酒	22.89	19.27	28.24	13.95	-0.15815	3.72759	3227528723	70296430572	244	1.66849e+10	1.66849e+10	-0.158148	-0.158148
2015	601158	重庆水务	8.8	9.33	14.52	7.5	0.04831	1.50338	7216218949	73881528427	237	44784000000	44784000000	0.067129	0.076404
2015	601168	西部矿业	9.29	7.39	14.31	5.82	-0.20022	7.70253	18355132235	174035132883	244	17610370000	17610370000	-0.197201	-0.194805
2015	601231	环旭电子	30.06	14.46	52.98	10.94	-0.51848	1.31446	2860174918	67311251086	242	3.14639e+10	3.14639e+10	-0.03266	-0.030503
2015	601238	广汽集团	8.71	22.57	24.5	8.01	1.60023	0.66426	4274498814	61951824949	244	1.45238e+11	1.45238e+11	1.62309	1.61866
2015	601699	潞安环能	11.54	6.42	16.16	5.77	-0.44367	3.91685	11716909252	118837782564	244	19204847064	19204847064	-0.2752	-0.273744
2015	601929	吉视传媒	11.5	6.18	21.97	5.71	-0.46167	3.76644	11716642242	143111511513	237	1.92248e+10	1.92248e+10	0.079419	0.08101
2015	601969	海南矿业	15.94	14.09	30.57	11.9	-0.11551	1.70275	3178474682	59575545022	212	26301380300	12098660300	-0.111166	-0.106089
2015	603288	海天味业	39.95	35.35	70.13	26.89	-0.11514	0.58114	1572701754	57474627031	244	95665796100	9525411000	0.613898	0.614018
2015	002653	海思科	17.23	21.89	38.62	18.27	0.27713	1.73118	1870141229	47846941799	239	23647110300	8.21152e+09	0.284708	0.288798
2015	002570	*ST因美	16	14.93	29.89	9.93	-0.07783	8.01601	8196535586	145209605794	235	15266223600	1.52362e+10	-0.077826	-0.077826
2015	000400	许继电气	20.26	19.43	35.7	14.53	-0.04286	7.61273	7676122434	190645536184	244	1.95918e+10	1.43286e+10	-0.037941	-0.037931
2015	002410	广联达	22.51	18.18	44.6	13.51	-0.18839	4.50378	5082006800	125318982744	207	2.05141e+10	1.57652e+10	0.229647	0.235268
2015	002353	杰瑞股份	30.56	25.38	44.55	24.27	-0.16977	4.43586	4248903703	142183994488	157	2.43103e+10	1.68601e+10	-0.165615	-0.163232
2015	000581	威孚高科	26.83	24.76	39.98	20.28	-0.07715	4.82237	4865535307	146355578480	240	2.35947e+10	2.35927e+10	-0.065117	-0.062244
2015	002001	新和成	15.2	17.44	28.39	12.65	0.14964	4.98333	5426439654	98754230886	234	18990747360	1.87132e+10	0.165611	0.172709
2015	002344	海宁皮城	16.06	15.34	30.47	11.3	-0.03583	5.05084	5656942047	106811269673	222	17180800000	1.69641e+10	-0.030615	-0.028284
2015	002375	亚厦股份	19.09	15.77	47.43	11.73	-0.16825	4.52172	6056052913	126422982800	222	2.11212e+10	1.78333e+10	0.250501	0.253425
2015	002038	双鹭药业	39.73	33.5	73.31	25	-0.15404	4.05126	2774710649	116495622690	241	22944150000	1.89944e+10	0.276749	0.276515
2016	000027	深圳能源	9.8	6.87	9.04	6.28	-0.29969	0.7877	3122817949	21894264278	244	2.72361e+10	2.72361e+10	-0.277707	-0.279307
2016	000046	泛海控股	12.55	9.29	11.59	9.23	-0.25976	0.34843	1810509673	18794997711	238	4.82727e+10	4.22684e+10	-0.248011	-0.247809
2016	000539	粤电力A	7.34	5.32	7.38	5.02	-0.27619	0.38796	2036882710	11297292128	244	2.62765e+10	1.61794e+10	-0.243094	-0.244898
2016	000581	威孚高科	24.77	22.44	25.19	16.08	-0.0937	2.26085	2281088815	47075412593	244	2.16176e+10	2.16159e+10	-0.072465	-0.073506
2016	000598	兴蓉环境	7.12	5.76	6.64	4.92	-0.19101	2.99432	8941680174	51949789822	244	1.72006e+10	1.72006e+10	-0.185322	-0.185183
2016	000729	燕京啤酒	8.23	6.95	8.12	6.5	-0.15553	0.97012	2734328953	20455414192	244	1.95888e+10	1.74399e+10	-0.147832	-0.147023
2016	000800	一汽轿车	16.31	10.87	15.08	10.1	-0.33598	2.72373	4432866507	52071348875	244	17690925000	1.53458e+10	-0.333385	-0.333354
2016	000825	太钢不锈	4.1	3.94	4.45	3.09	-0.03902	1.52279	8674202145	32609292442	244	2.24432e+10	2.24425e+10	-0.039024	-0.039024
2016	000831	*ST 五稀	20.61	12.14	18.7	11.16	-0.41353	5.32376	5222020166	78150940992	243	1.1908e+10	1.19079e+10	-0.413527	-0.413527
2016	000878	云南铜业	13.69	11.81	14.54	9.28	-0.14729	7.21477	10218988368	118390909841	235	16727669828	1.67276e+10	-0.147292	-0.147292
2016	000937	冀中能源	5.07	6.74	9.13	4.55	0.3373	3.03357	10719275637	67878378661	244	23816105769	1.95905e+10	0.338612	0.338294
2016	000960	锡业股份	13.37	13.12	17.16	9.28	-0.02526	6.50975	9582714050	126349488353	225	1.93134e+10	1.58676e+10	-0.02526	-0.02526
2016	000970	中科三环	14.05	13.35	17.67	9.24	-0.04847	9.93448	10582208686	153570228723	244	14220420000	14220420000	-0.043482	-0.042409
2016	000999	华润三九	27.2	24.73	27.48	20.03	-0.09414	1.02568	1004041480	24632061785	244	24208197000	2.41957e+10	-0.088918	-0.088645
2016	002001	新和成	17.3	19.6	24.12	13.1	0.12385	4.58745	4995365430	100730781458	240	21342812400	2.10325e+10	0.134822	0.135321
2016	002038	双鹭药业	33.15	26.71	33.71	21.34	-0.20269	2.30482	1578569198	44655767435	244	18293679000	1.51445e+10	-0.19771	-0.196716
2016	002085	万丰奥威	32.05	19.76	36.71	15.15	-0.38595	0.87052	1586428971	34542438848	242	3.60106e+10	3.27123e+10	0.229912	0.229646
2016	002129	中环股份	12.25	8.27	11	7.63	-0.32324	1.27648	3375327010	29486995068	74	2.18678e+10	2.18678e+10	-0.321604	-0.321604
2016	002344	海宁皮城	15.31	11.32	13.81	9.1	-0.26206	2.54043	3258717636	35182668647	244	1.45207e+10	1.25183e+10	-0.259536	-0.259778
2016	002399	海普瑞	34.66	18.22	31.83	16.33	-0.48487	0.8559	1067478269	23955721405	244	2.2724e+10	2.2724e+10	-0.157067	-0.158835
2016	002422	科伦药业	18.45	16.12	17.92	13.7	-0.13333	1.03851	1495450534	23552273038	244	23212800000	1.58528e+10	-0.124986	-0.12586
2016	002653	海思科	21.83	15.63	20.36	13.74	-0.28598	0.68092	735581014	12339684945	244	16884620100	7.06859e+09	-0.274742	-0.274555
2016	300085	银之杰	55.9	20.9	50.4	20.9	-0.62612	4.97177	3400758427	114526449691	240	1.42959e+10	6.87536e+09	-0.513554	-0.513417
2016	300182	捷成股份	23.84	10.31	21.6	10.31	-0.57042	0.91806	2352496048	34133238103	239	2.6419e+10	9.96677e+09	-0.352582	-0.352027
2016	600022	山东钢铁	3.08	2.5	3.38	2.32	-0.19614	1.35013	11368647793	30073685183	244	2.10511e+10	20555025205	-0.196141	-0.196141
2016	600027	华电国际	6.8	4.95	6.56	4.88	-0.27206	0.53558	5282441179	27937729910	244	4.88217e+10	4.20841e+10	-0.228119	-0.227941
2016	600098	广州发展	12.64	11.22	11.41	7.52	-0.11164	1.27315	3470862660	30834059043	244	3.05879e+10	3.05879e+10	-0.08969	-0.096595
2016	600108	亚盛集团	7.31	5.72	6.81	4.82	-0.22071	4.79098	9327632014	51313765850	243	1.11364e+10	1.11364e+10	-0.219813	-0.219891
2016	600166	福田汽车	6.4	3.09	6.28	2.66	-0.51185	2.10307	14027745255	53843209980	240	2.06107e+10	2.06107e+10	-0.017511	-0.017852
2016	600252	中恒集团	7.35	4.58	6.62	4.18	-0.37602	3.03237	10537800727	51495739294	243	1.5916e+10	1.57098e+10	-0.376022	-0.376022
2016	600277	亿利洁能	9.07	7.11	8.16	5.06	-0.2161	3.09175	6460491735	41268089067	242	14856981345	14856981345	-0.211442	-0.212018
2016	600315	上海家化	39.32	27.11	37.78	26.51	-0.3135	2.58238	1739016912	51037723787	243	1.82563e+10	1.81928e+10	-0.289817	-0.288427
2016	600316	洪都航空	23.82	19.66	22.3	15.37	-0.15767	3.29258	2361159148	45461351575	244	1.40985e+10	1.40985e+10	-0.157222	-0.157241
2016	600317	营口港	4.62	3.47	4.5	3.19	-0.26947	0.60263	3900824792	14441721095	244	2.24613e+10	2.24613e+10	-0.267467	-0.267368
2016	600348	阳泉煤业	6.45	6.73	8.4	5.6	0.0418	3.67567	8839997460	61890814242	244	16185650000	16185650000	0.041796	0.041796
2016	600350	山东高速	7.12	6.48	7.18	4.81	-0.08861	0.53581	2577863913	15129951847	234	3.11764e+10	3.11764e+10	-0.058453	-0.063432
2016	600398	海澜之家	13.97	10.79	13.08	9.39	-0.22708	0.49327	2216153378	24479496809	244	4.84769e+10	1.65219e+10	-0.204304	-0.203438
2016	600497	驰宏锌锗	10.95	7.03	13.43	5.37	-0.36322	3.50425	15102981190	135423312138	224	3.02986e+10	2.34459e+10	0.284362	0.282609
2016	600516	方大炭素	12.39	9.26	11.47	7.93	-0.25979	8.50375	14619316645	146993032556	244	1.59194e+10	1.59194e+10	-0.259792	-0.259792
2016	600578	京能电力	5.49	4.2	5.69	4.18	-0.30807	0.52644	2430761741	11151245030	207	1.93927e+10	1.93927e+10	-0.27655	-0.275124
2016	600582	天地科技	6.84	4.97	6.51	4.39	-0.27233	1.69594	7018778982	37573275986	244	2.05688e+10	1.37885e+10	-0.267761	-0.267936
2016	600597	光明乳业	15.97	13.06	15.56	10.36	-0.17965	1.83327	2256090811	29527624366	243	1.60721e+10	1.59894e+10	-0.171754	-0.172111
2016	600600	青岛啤酒	33.12	29.44	32.56	26.49	-0.11325	0.57551	777500896	22992370953	244	3.97729e+10	3.97729e+10	-0.10193	-0.101506
2016	600633	浙报传媒	18.95	17.66	19.21	11.44	-0.06213	3.16132	4115792388	64708924871	244	2.2992e+10	2.09852e+10	-0.051685	-0.053638
2016	600642	申能股份	7.55	5.87	7.31	5.49	-0.22252	0.74759	3403039377	20521304034	244	2.67205e+10	2.67205e+10	-0.19589	-0.196026
2016	600648	外高桥	26.12	19.74	24.24	16.01	-0.24857	1.51753	1722926745	33931996384	244	2.07832e+10	2.07832e+10	-0.243055	-0.242863
2016	600654	*ST中安	26.02	17.43	27.38	17.43	-0.39563	2.56009	3284648469	72869406510	114	2.23631e+10	1.31604e+10	-0.392826	-0.392164
2016	600666	奥瑞德	47.58	26.95	42.56	26.89	-0.42951	3.01684	2314156207	70997057372	228	20672776355	1.3386e+10	-0.429509	-0.429509
2016	600717	天津港	11.23	10.08	10.92	8.19	-0.10559	1.46911	2460419560	23845647823	234	1.68817e+10	1.68817e+10	-0.082657	-0.086069
2016	600754	锦江股份	51.03	29.46	48.34	29.16	-0.42595	1.36569	1308247617	48128486483	244	2.5929e+10	1.54797e+10	-0.41912	-0.416602
2016	600783	鲁信创投	37.6	22.62	35.16	19.77	-0.42104	4.38199	3261771574	79718726152	244	1.68374e+10	1.68374e+10	-0.418458	-0.41848
2016	600809	山西汾酒	19.25	25.02	25.12	14.85	0.29839	2.0383	1764861601	37013734421	243	2.16635e+10	2.16635e+10	0.315782	0.314997
2016	600839	四川长虹	5.67	4.18	5.21	3.41	-0.27807	5.18563	23938112605	103844553256	244	1.92959e+10	1.92698e+10	-0.278066	-0.278066
2016	600863	内蒙华电	4.45	3.08	4.34	2.99	-0.31096	0.90621	5263020261	17405071090	234	17887854600	17887854600	-0.297583	-0.297539
2016	600867	通化东宝	27.34	21.93	26.08	19.62	-0.19286	0.88389	1256831552	28997888130	243	3.1183e+10	2.98972e+10	-0.023584	-0.024071
2016	600873	梅花生物	8.23	6.52	8.23	5.91	-0.28665	2.60985	8112011674	53586210711	148	2.02656e+10	2.02656e+10	-0.275091	-0.275711
2016	600875	东方电气	13.64	10.79	12.93	9.52	-0.20836	1.56506	3657381027	38320327080	228	2.52152e+10	2.52152e+10	-0.203628	-0.203962
2016	601016	节能风电	15.78	8.85	14.2	8.85	-0.43916	0.9438	1961012215	20563191317	244	18388353000	9892353000	-0.436599	-0.436312
2016	601098	中南传媒	23.65	16.66	21.94	15.9	-0.30293	0.69322	1245028323	22798457953	244	29921360000	29921360000	-0.291605	-0.290795
2016	601106	中国一重	8.02	5.41	7.39	5.09	-0.3212	2.19354	14341350048	83534339288	237	35370580000	35370580000	-0.321205	-0.321205
2016	601158	重庆水务	9.33	7.43	8.78	6.26	-0.20364	0.49385	2370462508	17552068360	244	35664000000	35664000000	-0.17213	-0.175777
2016	601168	西部矿业	7.35	7.83	8.91	5.85	0.05954	2.17018	5171535192	40167753031	119	18658890000	18658890000	0.067665	0.066306
2016	601179	中国西电	6.82	5.58	6.31	4.96	-0.18062	0.76821	3937775117	21946059747	244	2.86024e+10	2.86024e+10	-0.15799	-0.160059
2016	601231	环旭电子	14.47	10.71	13.02	8.48	-0.25934	1.07532	2339813881	25438702220	244	2.33041e+10	2.33041e+10	-0.252688	-0.25242
2016	601258	庞大集团	3.92	2.77	3.71	2.63	-0.29337	2.63986	17621239355	51229164162	241	1.84899e+10	1.79499e+10	-0.293368	-0.293367
2016	601699	潞安环能	6.42	8.05	10.5	5.94	0.25389	3.65198	10924557871	85433827978	225	24080844060	24080844060	0.253894	0.253894
2016	601808	中海油服	15.55	12.83	14.58	11.72	-0.17332	0.32094	1531399255	19712307752	244	61219525360	61219525360	-0.168721	-0.168943
2016	601928	凤凰传媒	15.87	10.47	14.44	10.12	-0.34275	1.15552	2940674329	33345062447	244	26645103000	26645103000	-0.336775	-0.336472
2016	601929	吉视传媒	6.18	4.19	5.65	3.79	-0.32201	2.0751	6455227625	28811999730	244	1.30343e+10	1.30343e+10	-0.317791	-0.317961
2016	601969	海南矿业	14.09	12.24	14.09	9.77	-0.1313	0.70281	1311908693	16013404782	244	22848040800	10510120800	-0.128925	-0.12917
2016	603000	人民网	22.7	17.66	21.5	14.08	-0.22578	3.05329	3375993944	61576179215	244	1.95265e+10	1.95265e+10	-0.22304	-0.22249
2016	603288	海天味业	35.08	29.33	33.61	25.94	-0.1703	0.1607	434677633	13111765594	244	79336204031	7970330711	-0.15372	-0.153324
2016	603885	吉祥航空	34	23.3	32.54	21.25	-0.31812	0.95736	1228849309	33213299019	244	2.99074e+10	5009500000	-0.311459	-0.310799
2016	600998	九州通	19.55	20.74	23.85	14.58	0.05816	0.87278	1437491528	26716993302	235	3.41593e+10	2.99075e+10	0.066327	0.064796
2016	601238	广汽集团	22.57	23.17	25.97	18.67	0.02658	0.12442	802803347	18438717933	234	1.49505e+11	1.49505e+11	0.035797	0.035445
2016	300146	汤臣倍健	38.25	11.94	36.93	11.93	-0.68987	1.95587	2875764128	48360560829	244	1.75556e+10	1.02701e+10	-0.367515	-0.364156
2016	000712	锦龙股份	28	23.44	26.55	17.43	-0.19505	5.15686	4620549990	98493725048	219	21002240000	19448168000	-0.190623	-0.191621
2016	000400	许继电气	19.46	18.15	18.48	12.23	-0.06588	2.82974	2853303888	44466593985	244	1.83011e+10	1.33844e+10	-0.059663	-0.060731
2016	000039	中集集团	21	14.62	19.5	12.68	-0.30381	0.99516	2964110832	44399426958	244	4.35459e+10	4.35329e+10	-0.292909	-0.293333
2016	002353	杰瑞股份	25.4	20.3	22.92	14.67	-0.20016	4.16664	3991033465	74577575126	227	1.94444e+10	1.36786e+10	-0.198928	-0.198976
2016	002410	广联达	18.14	14.6	17.75	10.6	-0.19692	2.57513	2882501938	41300287579	244	1.63427e+10	1.26457e+10	-0.184495	-0.185831
2016	002051	中工国际	25.33	22.92	28.11	18.95	-0.09514	2.07372	1923927829	45227226917	244	2.12644e+10	2.10942e+10	0.099957	0.097671
2016	002568	百润股份	38.42	20.24	38.42	19.98	-0.52588	1.71453	1596396241	38836529190	234	18845464000	7.63949e+09	-0.525884	-0.525884
2016	000629	*ST 钒钛	3.63	2.39	3.82	2.34	-0.34877	2.25322	19354571624	58635016915	166	2.05295e+10	1.13938e+10	-0.348774	-0.348774
2016	000883	湖北能源	6.14	4.58	5.93	4.13	-0.25407	0.58485	3805855138	18066341565	244	2.98041e+10	2.44846e+10	-0.240076	-0.239251
2016	000061	农产品	17.7	12.37	15.92	11.91	-0.30073	1.73497	2944174101	38809845856	244	2.09914e+10	2.09242e+10	-0.297864	-0.297908
2016	000778	新兴铸管	6.49	5.17	6.09	4.5	-0.20339	4.0636	14804931205	76472108497	244	1.88359e+10	1.88341e+10	-0.198629	-0.198767
2016	300002	神州泰岳	13.2	9.24	11.83	7.55	-0.29466	2.79639	5483976765	53918494288	244	1.81205e+10	1.0192e+10	-0.291209	-0.29084
2016	300058	蓝色光标	14.77	10.17	13.3	7.86	-0.30957	2.79528	5587425589	57643555658	238	2.03286e+10	1.44484e+10	-0.306446	-0.306178
2016	002375	亚厦股份	15.82	10.58	14.26	9.99	-0.32911	2.93816	3937123438	47050320344	244	1.41772e+10	1.15208e+10	-0.325698	-0.325301
2016	002570	贝因美	14.93	13.12	14.56	10.17	-0.12123	4.01377	4104164452	50707901916	244	13415462400	1.33901e+10	-0.121232	-0.121232
2017	000027	深圳能源	6.88	6.06	7.8	5.96	-0.1179	0.61159	2424649111	16618212139	244	2.40248e+10	2.40248e+10	-0.098215	-0.09607
2017	000061	农产品	12.42	7.66	12.75	7.37	-0.38076	0.48628	825202688	8332680600	179	1.29987e+10	1.29485e+10	-0.377424	-0.376718
2017	000156	华数传媒	17.98	11.4	18.19	11.4	-0.36348	0.5731	821454315	12560898806	240	1.63402e+10	1.13273e+10	-0.35748	-0.355667
2017	000539	粤电力A	5.34	4.82	6.43	4.79	-0.09398	0.30984	1626742978	8934125948	244	2.36471e+10	1.44989e+10	-0.080335	-0.078947
2017	000555	神州信息	21.14	11.75	22.94	11.66	-0.44654	0.67776	652975368	12200127950	132	1.13203e+10	10451609631	-0.445653	-0.445313
2017	000581	威孚高科	22.35	24	27.7	21.16	0.06952	3.11222	3140080510	78348243104	244	2.24855e+10	2.24836e+10	0.094487	0.096257
2017	000598	兴蓉环境	5.79	5.43	6.21	5.25	-0.05729	1.83165	5469697559	31655943401	244	1.62152e+10	1.62152e+10	-0.047355	-0.047135
2017	000629	*ST 钒钛	2.36	3.07	3.24	2.27	0.28452	0.46444	3989420574	10333506064	70	2.63705e+10	1.46351e+10	0.284519	0.284519
2017	000686	东北证券	12.38	8.77	12.69	8.6	-0.29045	2.2019	5153451769	55588629767	244	2.05258e+10	2.05258e+10	-0.283386	-0.282362
2017	000738	航发控制	24.87	15.29	26.59	15.22	-0.38197	1.55495	1781414164	38232125100	244	1.75169e+10	1.75169e+10	-0.381314	-0.381164
2017	000750	国海证券	6.27	4.9	6.94	4.83	-0.29699	1.84094	7760549644	46429176751	231	2.06562e+10	2.06561e+10	-0.28392	-0.28264
2017	000778	新兴铸管	5.18	5.22	8.5	4.95	0.00967	6.69122	26703872747	183017671248	244	2.08324e+10	1.90165e+10	0.01433	0.015474
2017	000793	华闻传媒	11.3	10.01	11.67	9.74	-0.11337	2.62901	5261432017	56042894916	244	2.0033e+10	1.87464e+10	-0.109681	-0.109389
2017	000800	一汽轿车	10.92	10.76	15.02	9.41	-0.01012	2.7205	4427615384	50410173470	244	17511900000	1.51905e+10	-0.01012	-0.01012
2017	000878	云南铜业	11.93	14.19	17.27	11.11	0.20152	6.33715	8975935504	128226400174	244	20098698972	2.00986e+10	0.201524	0.201524
2017	000883	湖北能源	4.6	4.63	5.28	4.56	0.01092	0.48552	3159521164	15467005080	244	3.01295e+10	2.4751e+10	0.030122	0.030786
2017	000937	冀中能源	6.78	5.82	8.08	5.56	-0.1365	3.42992	12119794801	83842813625	244	20565242667	1.69164e+10	-0.121961	-0.121662
2017	000960	锡业股份	13.2	13.2	16.02	10.95	0.0061	3.77934	6306874969	88936692514	244	2.20278e+10	1.59644e+10	0.006098	0.006098
2017	000970	中科三环	13.36	14.38	20.88	12.19	0.07715	7.47777	7965325326	131519323274	244	15317576000	15317576000	0.085695	0.084644
2017	000977	浪潮信息	21.29	19.88	22.36	15.75	-0.06226	3.84196	4953251555	95167767893	238	2.56303e+10	2.55281e+10	0.025803	0.061086
2017	000999	华润三九	24.8	27.2	31.78	23.99	0.09988	1.19382	1168627739	32924601951	244	26626080000	2.66124e+10	0.105823	0.106349
2017	002129	中环股份	9.06	11.49	13.71	9.06	0.38936	1.6663	4406095481	52265848608	23	3.03823e+10	3.03823e+10	0.393656	0.392039
2017	002131	利欧股份	16	2.6	16.12	2.6	-0.83699	1.52382	8517325612	46804496776	244	1.45326e+10	8.86962e+09	-0.427792	-0.427147
2017	002174	游族网络	26.26	22.3	33.38	20.75	-0.1569	1.84183	1636406355	44856758861	244	1.98128e+10	1.28654e+10	-0.154983	-0.154253
2017	002292	奥飞娱乐	22.8	14.29	23.2	13.48	-0.37048	1.87828	2454812617	41424311937	244	1.86762e+10	1.08628e+10	-0.368925	-0.368722
2017	002375	亚厦股份	10.59	7.52	11.63	7.48	-0.28922	1.17058	1568578517	14831754720	244	1.00768e+10	8.8065e+09	-0.285969	-0.285444
2017	002399	海普瑞	18.2	15.28	22.5	15.2	-0.16136	0.32815	409266027	7738815532	135	1.90572e+10	1.90572e+10	-0.149924	-0.14764
2017	002424	贵州百灵	18.94	15.4	20.44	15.13	-0.18691	1.16411	1642797807	29228903649	244	21732480000	1.12214e+10	-0.182969	-0.182682
2017	002426	胜利精密	8.27	5.83	8.43	5.74	-0.29504	0.50846	1739596371	10876445275	55	1.9946e+10	1.2034e+10	-0.291978	-0.291415
2017	002465	海格通信	11.73	9.59	12.58	8.84	-0.17682	1.72481	3979815280	44780623641	238	2.21279e+10	1.7779e+10	-0.16908	-0.16824
2017	002568	百润股份	20.27	13.27	23.2	12.92	-0.34437	0.67643	473710164	8603939257	244	9.29305e+09	5.48187e+09	-0.344368	-0.344368
2017	002831	裕同科技	69.2	55.88	79.42	55.88	-0.19249	1.04633	418542516	28655350338	244	22352558800	6677347072	-0.187079	-0.18526
2017	002839	张家港行	5.24	11.72	29.95	6.29	1.68192	3.40741	6158981334	102327783939	218	2.11842e+10	2118507200
2017	300002	神州泰岳	9.3	6.12	10.22	6.02	-0.33766	1.37811	2702609360	22053452267	244	1.20019e+10	8.46629e+09	-0.335573	-0.334848
2017	300085	银之杰	20.88	13.6	21.61	13.02	-0.34928	2.69641	1905390017	34283037683	170	9610311276	5.33711e+09	-0.348703	-0.348565
2017	300104	乐视网	36.88	15.326	39.35	30.68	-0.5719	1.03877	2072062894	71867944823	57	6.11422e+10	3.90028e+10	-0.143017	-0.143017
2017	300133	华策影视	11.38	10.84	12.97	9.58	-0.04493	2.10146	3718967679	42345947817	244	1.91836e+10	1.28745e+10	-0.042406	-0.042291
2017	300182	捷成股份	10.29	8.61	10.5	8.27	-0.16489	1.19394	3050487019	29182958129	244	2.19983e+10	1.18702e+10	-0.161506	-0.16129
2017	600022	山东钢铁	2.51	2.14	2.97	2.01	-0.144	2.75725	30182326697	74564089332	244	2.34256e+10	2.28736e+10	0.1128	0.1128
2017	600037	歌华有线	15.34	12.99	16.21	12.66	-0.15209	1.248	1736932855	25863512817	244	1.80792e+10	1.51769e+10	-0.141461	-0.140339
2017	600060	海信电器	17.12	15.02	19.54	13.53	-0.12266	2.9772	3895609465	62359157708	243	1.96534e+10	1.96534e+10	-0.096467	-0.099065
2017	600074	*ST保千	13.22	9.87	13.94	9.87	-0.25453	0.6765	1649226086	21279194149	136	2.40619e+10	1.01271e+10	-0.254532	-0.254532
2017	600098	广州发展	11.2	7.07	12.32	6.88	-0.36988	1.44549	3940698773	37801277398	244	1.92742e+10	1.92742e+10	-0.361541	-0.360963
2017	600108	亚盛集团	5.76	4.11	5.96	3.88	-0.28147	2.41228	4696507254	23026760024	244	8.00182e+09	8.00182e+09	-0.280791	-0.280769
2017	600150	*ST船舶	27.72	24.67	31.63	21.56	-0.10648	2.57776	3552457480	95423203308	181	3.39982e+10	3.39982e+10	-0.106483	-0.106483
2017	600166	福田汽车	3.1	2.81	3.61	2.75	-0.09061	2.46203	16422085280	50655124580	244	1.87431e+10	1.87431e+10	-0.082348	-0.082201
2017	600252	中恒集团	4.57	4.39	4.83	3.87	-0.04148	1.72167	5982992234	25976633662	244	1.52557e+10	1.52557e+10	-0.030782	-0.031659
2017	600256	广汇能源	4.67	5.06	5.45	4.01	0.08351	1.74758	9124873951	42233662309	244	2.64204e+10	2.64204e+10	0.09142	0.089936
2017	600277	亿利洁能	7.18	6.44	7.93	5.58	-0.09423	0.73165	2003949128	14014587809	116	1.76388e+10	13456956380	-0.089188	-0.088608
2017	600315	上海家化	27.27	36.89	37.49	25.76	0.36075	1.60605	1081542222	34260114577	232	2.48423e+10	2.47624e+10	0.365114	0.364441
2017	600316	洪都航空	19.68	14.16	22.88	14.03	-0.27976	3.17538	2277114525	42678456427	244	1.01543e+10	1.01543e+10	-0.27943	-0.2794
2017	600317	营口港	3.47	3.39	4.06	3.27	-0.02305	0.60114	3891161394	14073991392	243	2.19434e+10	2.19434e+10	-0.016999	-0.016427
2017	600348	阳泉煤业	6.76	7.38	8.81	6.05	0.09658	3.15805	7595100613	56965485982	244	17748900000	17748900000	0.096582	0.096582
2017	600350	山东高速	6.53	5.99	7.22	5.86	-0.07562	0.5488	2640381865	16913147781	244	2.88189e+10	2.88189e+10	-0.046629	-0.04537
2017	600446	金证股份	25.16	15.14	25.85	14.52	-0.39753	3.51565	2935599113	57322539500	244	12642043830	12133339830	-0.394146	-0.39415
2017	600497	驰宏锌锗	7.08	7.1	8.65	5.42	0.00996	3.74067	19044827415	140994479796	244	3.61482e+10	3.06003e+10	0.009957	0.009957
2017	600578	京能电力	4.2	3.7	5.27	3.65	-0.11905	0.43434	2930379289	13039629166	244	2.49629e+10	1.70841e+10	-0.083975	-0.078571
2017	600582	天地科技	4.97	4.65	5.87	4.15	-0.06439	1.35124	5592235802	27962124815	244	1.92444e+10	1.29007e+10	-0.058829	-0.05835
2017	600597	光明乳业	13.06	15.15	16.01	11.44	0.16003	1.5186	1859512748	25354361081	244	1.8551e+10	1.85482e+10	0.174877	0.171516
2017	600600	青岛啤酒	29.5	39.33	41	29.35	0.33594	0.52333	707008649	23778346097	244	5.31342e+10	5.31342e+10	0.350059	0.347826
2017	600633	浙数文化	17.75	15.2	21.21	13.98	-0.1393	1.75216	2281177142	42452227049	205	1.97892e+10	1.96121e+10	-0.135074	-0.133918
2017	600642	申能股份	5.86	5.86	6.48	5.57	-0.0017	0.70312	3200645949	19532725905	244	2.66749e+10	2.66749e+10	0.033549	0.035775
2017	600648	外高桥	19.9	18.5	21.25	17.04	-0.06282	0.64358	730690746	14045965876	234	1.92279e+10	1.92279e+10	-0.052524	-0.052685
2017	600649	城投控股	18.31	8.8	18.31	8.79	-0.56735	1.51553	3833635519	43523385402	186	2.22603e+10	2.1303e+10	-0.567355	-0.567355
2017	600654	*ST 中安	16.56	5.29	16.56	4.85	-0.6965	1.40169	1798397172	10906308244	78	6.78718e+09	3.99418e+09	-0.6965	-0.6965
2017	600666	奥瑞德	26.93	17.4	29.93	27.05	-0.35436	2.23537	1714708730	48517487779	71	21355476576	1.39836e+10	0.033024	0.033024
2017	600685	中船防务	29.71	26.66	40.38	24.95	-0.10236	1.22547	1732215644	53864580243	181	3.76841e+10	3.04299e+10	-0.101802	-0.101818
2017	600717	天津港	10.08	10.49	18.4	9.88	0.04067	3.60504	6037611429	80782078207	244	1.75683e+10	1.75683e+10	0.059245	0.063194
2017	600718	东软集团	19.7	14.66	20.79	13.59	-0.25432	3.55624	4419264743	78054721943	244	1.82177e+10	1.81289e+10	-0.249544	-0.249237
2017	600737	中粮糖业	12.52	7.95	13.05	7.91	-0.36196	2.17915	4471350488	46431499994	244	1.63124e+10	1.63124e+10	-0.35302	-0.351525
2017	600754	锦江股份	29.5	32.29	33.82	24.59	0.09606	0.59167	566786926	16774955871	244	2.8503e+10	2.35491e+10	0.116485	0.112356
2017	600783	鲁信创投	22.68	15.35	25.36	14.28	-0.3214	1.81209	1348845201	26697527792	244	1.14259e+10	1.14259e+10	-0.314822	-0.314766
2017	600827	百联股份	14.38	13.49	20.04	12.83	-0.06058	2.2404	3997253643	64496113967	244	2.32975e+10	2.24655e+10	-0.048988	-0.04805
2017	600839	四川长虹	4.18	3.48	4.52	3.31	-0.16746	2.6475	12221518861	47779813626	244	1.60645e+10	16057731114	-0.158031	-0.157895
2017	600863	内蒙华电	3.08	2.97	3.76	2.88	-0.03571	1.06741	6199230604	20096975802	244	17249002650	17249002650	-0.028891	-0.028247
2017	600871	*ST油服	4.1	2.67	4.29	2.67	-0.34878	0.66417	9393121311	33473472818	215	3.77609e+10	1.31319e+10	-0.348781	-0.34878
2017	600873	梅花生物	6.54	5.16	7.63	5.08	-0.20859	2.9178	9069178144	57935363162	244	1.60384e+10	1.60384e+10	-0.173725	-0.162577
2017	600875	东方电气	10.9	11.23	11.77	9.07	0.04078	1.29905	3035751951	31848975521	189	2.62434e+10	2.62434e+10	0.040778	0.040778
2017	600895	张江高科	17.82	14.3	18.62	14.13	-0.193	1.13889	1763785801	30130968506	244	22146260565	22146260565	-0.185604	-0.184537
2017	601016	节能风电	8.83	3.29	9.07	3.23	-0.62825	1.36256	5662196103	25539338290	244	13671792400	13671792400	-0.252985	-0.251864
2017	601098	中南传媒	16.69	13.89	18.76	13.38	-0.16627	0.83299	1496056055	23965015038	244	24946440000	24946440000	-0.142609	-0.136255
2017	601106	*ST 一重	5.41	3.77	5.66	2.93	-0.30314	0.98909	6782973650	27948000912	243	2.58538e+10	24648260000	-0.303144	-0.303142
2017	601118	海南橡胶	7.02	5.55	8.12	5.14	-0.20259	1.78903	7032970596	46912865885	239	21818002380	21818002380	-0.202586	-0.202586
2017	601127	小康股份	26.74	20.11	26.99	17.32	-0.24794	1.08489	986386498	21730441924	233	18284012000	3619800000	-0.237341	-0.236724
2017	601158	重庆水务	7.45	6.46	8.38	6.32	-0.13055	0.2757	1323349342	9857406846	244	31008000000	31008000000	-0.097204	-0.092867
2017	601163	三角轮胎	33.96	20.38	34.68	19.79	-0.39971	1.35348	1082785041	30145847428	244	16304000000	5715423245	-0.389837	-0.387923
2017	601168	西部矿业	8.61	8.2	10.27	6.52	0.04725	3.36982	8030282238	69478927296	175	19540600000	19540600000	0.055285	0.05364
2017	601179	中国西电	5.58	4.37	6.82	4.27	-0.21685	0.74273	3807126206	22091441574	244	2.24001e+10	2.24001e+10	-0.202289	-0.198925
2017	601231	环旭电子	10.72	15.77	17.04	9.87	0.47246	1.54005	3351031163	47230954626	244	3.43143e+10	3.43143e+10	0.484463	0.483473
2017	601258	庞大集团	2.79	2.5	4.21	2.49	-0.09747	4.36348	29124741787	92452459706	244	16686658505	16346196005	-0.097473	-0.097473
2017	601375	中原证券	4.8	6.17	13.26	5.71	0.5425	4.36182	17114609470	173091033965	244	24209443099	1.20316e+10
2017	601608	中信重工	5.6	4.12	6.08	4.02	-0.2656	0.9954	4319447635	23651289622	173	1.78784e+10	1.77161e+10	-0.265597	-0.265597
2017	601699	潞安环能	8.04	11.38	11.99	6.76	0.41366	4.22518	12639248366	120744937001	244	34042236696	34042236696	0.429954	0.424845
2017	601872	招商轮船	4.94	4.39	5.63	4.34	-0.11134	0.73424	3891085845	20281396724	144	2.32646e+10	2.07248e+10	-0.09491	-0.091093
2017	601928	凤凰传媒	10.48	8.11	10.75	8.03	-0.22541	0.59099	1504021971	14606246294	244	20639139000	20639139000	-0.213072	-0.211079
2017	601929	吉视传媒	4.17	2.96	4.28	2.93	-0.29356	0.99346	3090444265	11225445793	244	9.20797e+09	9.20797e+09	-0.288424	-0.287589
2017	601966	玲珑轮胎	26.88	17.46	27.66	16.21	-0.35069	1.03523	1242271723	26876623391	239	20952000000	6886224000	-0.345682	-0.344515
2017	601969	海南矿业	12.28	8.85	13.82	8.5	-0.27696	0.68449	1337992988	15966018204	244	1.72993e+10	16520029500	-0.276961	-0.276961
2017	603000	人民网	17.67	10.83	17.94	10.72	-0.38675	1.60272	1772113314	25974704906	244	1.19746e+10	1.19746e+10	-0.384745	-0.384202
2017	603885	吉祥航空	23.33	15.29	24.86	13.17	-0.34378	0.50962	915787984	15516989604	244	2.74763e+10	8.21094e+09	-0.071155	-0.070558
2017	300058	蓝色光标	10.14	5.52	10.18	5.46	-0.45723	1.49059	3298713467	26726439884	244	1.22159e+10	8.66509e+09	-0.452694	-0.450796
2017	000039	中集集团	14.65	22.85	22.85	14.74	0.56293	1.29053	3848343782	69703217206	244	6.81384e+10	6.81218e+10	0.568186	0.567031
2017	300146	汤臣倍健	11.9	15.02	15.27	10.35	0.25796	2.96854	4364122163	58382240013	244	2.20812e+10	13099617900	0.287907	0.279732
2017	002038	双鹭药业	26.73	30.97	40.06	23.49	0.15949	1.74185	1192991460	36556321949	244	21211353000	1.75413e+10	0.167647	0.166979
2017	000712	锦龙股份	23.51	16.98	24.45	14.53	-0.2756	3.35742	3008249642	59792896246	241	15214080000	1.52015e+10	-0.271463	-0.271331
2017	600021	上海电力	12.07	9.14	13.61	9.04	-0.24712	0.91456	2203780394	27209133545	238	2.20243e+10	1.95572e+10	-0.236127	-0.23229
2017	000400	许继电气	18.04	13.19	19.61	12.95	-0.27328	1.77265	1787408911	30335928914	244	1.32998e+10	1.3298e+10	-0.269225	-0.267769
2017	002410	广联达	14.57	19.6	22.6	13.28	0.34247	1.67886	1879257278	33536634118	244	2.19395e+10	16940819000	0.369278	0.363014
2017	002049	紫光国微	33.15	47.99	52.76	23.84	0.45689	5.30875	3221446869	131117146703	144	2.91212e+10	2.89243e+10	0.459832	0.458591
2017	002152	广电运通	13.37	7.44	13.91	6.58	-0.43976	1.23864	3008520354	27766550557	244	18070909794	1.45429e+10	-0.152898	-0.152108
2017	002051	中工国际	22.76	18.43	31.39	17.91	-0.1959	1.89898	2113132464	50169545719	243	2.05084e+10	2.04189e+10	-0.021424	-0.019808
2017	002353	杰瑞股份	20.25	13.12	23.75	12.42	-0.35369	2.38355	2283090165	40207325630	244	1.2567e+10	8.75042e+09	-0.352476	-0.352217
2017	002653	海思科	15.66	11.37	16.62	11.31	-0.27255	0.39988	431977963	5914679196	244	12282669900	5.49384e+09	-0.246308	-0.243122
2017	002344	海宁皮城	11.35	7.93	11.62	7.86	-0.29947	0.8474	1086995653	10176886581	201	1.01722e+10	8.75237e+09	-0.295271	-0.295053
2017	002841	视源股份	22.87	72.5	101.5	27.45	2.80378	1.26086	512301290	40137222543	232	29457656250	2936250000
2017	000718	苏宁环球	8.6	4.33	8.59	4.28	-0.49826	0.99772	3027711525	18746673072	244	1.314e+10	9.91185e+09	-0.480961	-0.475087
2017	000825	太钢不锈	3.95	4.96	6.07	3.95	0.25888	3.25131	18520277962	94114650397	244	2.82534e+10	2.82525e+10	0.264752	0.263959
2017	002183	怡亚通	10.87	7.05	11.45	6.91	-0.35083	2.28092	4833949350	44126152732	223	1.4941e+10	1.49254e+10	-0.344654	-0.343462
2017	002195	二三四五	11.36	5.84	12.82	5.72	-0.4841	3.70547	12658214017	98393423990	244	1.995e+10	1.81729e+10	-0.118841	-0.118551
2017	000831	五矿稀土	12.45	12.38	17.5	10.02	0.01977	5.92143	5808263762	82667285462	243	1.21434e+10	1.21433e+10	0.019769	0.019769
2017	002299	圣农发展	21.3	14.4	21.15	12.58	-0.32139	1.46746	1818885564	29021325761	188	1.78485e+10	12972458880	-0.294636	-0.297832
2017	300168	万达信息	20.23	13.48	20.5	12.25	-0.33333	3.19768	3297072971	50815402978	197	1.3899e+10	13595698166	-0.331908	-0.33185
2017	300315	掌趣科技	9.27	5.56	9.41	5.43	-0.39827	2.54997	7032801145	54601328658	145	1.53344e+10	1.46931e+10	-0.396878	-0.396212
2017	000008	神州高铁	9.33	8.75	9.53	6.98	-0.06116	0.7224	2035969759	17177062823	243	2.46604e+10	1.75891e+10	-0.059839	-0.060086
2017	002570	贝因美	13.16	7.2	14.09	6.94	-0.45122	2.2326	2282881606	25669159400	205	7362144000	7.36044e+09	-0.45122	-0.45122
2017	000009	中国宝安	10.39	7.23	10.65	7.1	-0.30212	3.43993	7393586968	65573917757	244	1.55398e+10	1.53282e+10	-0.300474	-0.300193
2017	000046	泛海控股	9.3	7.46	9.7	7.07	-0.19699	0.22043	1145395143	9870860584	244	3.87637e+10	3.79838e+10	-0.182474	-0.18084
2017	000729	燕京啤酒	6.97	6.74	7.73	5.78	-0.03022	0.93529	2636152904	17671994028	244	1.8997e+10	1.69127e+10	-0.02499	-0.025036
2017	000917	电广传媒	14.38	9.06	14.75	8.64	-0.3704	2.79247	3958486783	46261002873	244	1.28431e+10	1.17293e+10	-0.36871	-0.368311
2018	000008	神州高铁	8.75	3.89	8.77	3.54	-0.55543	1.66499	4692484827	22350711659	188	1.09633e+10	9.94512e+09	-0.550445	-0.549714
2018	000009	中国宝安	7.27	4.31	7.64	3.62	-0.40387	1.87298	4025681789	22213349792	243	9.26368e+09	9.13629e+09	-0.401517	-0.401107
2018	000027	深圳能源	6.07	5.25	6.21	4.78	-0.13366	0.35858	1421572382	7855317980	243	2.08136e+10	2.08136e+10	-0.119662	-0.120462
2018	000039	中集集团	22.75	10.58	23.03	9.61	-0.53698	0.81633	2436703823	38108742416	243	3.15812e+10	3.15731e+10	-0.526809	-0.525164
2018	000046	泛海控股	7.46	4.67	8.08	4.57	-0.37399	0.33092	1719522221	10138011201	186	2.42663e+10	2.37189e+10	-0.358025	-0.353887
2018	000060	中金岭南	11.26	3.96	12.1	3.94	-0.64548	1.91196	6825086700	52691515414	243	1.4136e+10	1.41302e+10	-0.453877	-0.445837
2018	000061	农产品	7.66	4.85	8.04	3.99	-0.36684	0.70574	1197620453	7001240540	233	8.23028e+09	8.22279e+09	-0.360935	-0.360313
2018	000156	华数传媒	10.26	7.93	10.26	7.8	-0.30439	0.51656	740409342	6579111619	128	1.13665e+10	1.01527e+10	-0.287461	-0.286842
2018	000400	许继电气	13.22	8.89	13.51	7.41	-0.326	2.26013	2278949370	22460804921	243	8.96403e+09	8.96278e+09	-0.324406	-0.324488
2018	000503	海虹控股	44.05	15.88	44.11	13.21	-0.63207	3.50396	3149432756	88111349835	233	1.42733e+10	1.42733e+10	-0.632067	-0.632067
2018	000539	粤电力A	4.82	4.63	4.96	3.72	-0.03942	0.13787	723857787	3177978932	243	2.2522e+10	1.37344e+10	-0.02121	-0.022822
2018	000555	神州信息	11.81	9.34	17.37	8.93	-0.20511	3.66725	3533143499	46812452422	238	8.99845e+09	8.7321e+09	-0.203085	-0.202383
2018	000559	万向钱潮	10	5.12	10.24	4.55	-0.49557	0.68064	1873915445	13932929086	243	1.40962e+10	1.40961e+10	-0.483338	-0.475862
2018	000581	威孚高科	23.85	17.66	26.47	16.54	-0.26417	1.91593	1933075621	43396034710	243	1.68219e+10	1.68205e+10	-0.221448	-0.214167
2018	000598	兴蓉环境	5.43	4.03	5.53	3.87	-0.25783	0.82122	2452343048	11334877830	243	1.20345e+10	1.20345e+10	-0.243569	-0.243462
2018	000686	东北证券	8.79	6.26	9.48	5.11	-0.2862	1.41649	3315216522	23957828459	243	1.46512e+10	1.46512e+10	-0.275752	-0.2748
2018	000712	锦龙股份	17.03	9.08	17.46	7.29	-0.46525	2.40053	2150871111	24198424035	243	8135680000	7.22765e+09	-0.458999	-0.459364
2018	000718	苏宁环球	4.34	3.18	5.61	2.71	-0.26559	1.11441	3381839444	14103932722	243	9.65014e+09	7.28014e+09	-0.246854	-0.242494
2018	000729	燕京啤酒	6.66	5.64	9.22	5.48	-0.1632	1.22647	3456846795	25724466496	243	1.58966e+10	1.41533e+10	-0.160726	-0.160237
2018	000738	航发控制	15.29	12.06	17.49	11.26	-0.21125	2.32794	2666991560	39762913863	243	1.38164e+10	1.38164e+10	-0.209198	-0.20896
2018	000750	国海证券	4.91	4.36	5.37	2.77	-0.1102	2.95147	12442029235	55060479591	243	1.83798e+10	1.83797e+10	-0.096723	-0.097959
2018	000778	新兴铸管	5.22	4.31	5.67	4.06	-0.17433	1.5078	6017460853	29012497449	243	1.72007e+10	1.68998e+10	-0.143825	-0.145594
2018	000792	盐湖股份	14	6.98	16.3	6.98	-0.4982	2.60663	7262293821	84535698380	243	1.94469e+10	1.91943e+10	-0.498203	-0.498203
2018	000793	华闻传媒	9.99	2.97	10.1	2.61	-0.7033	3.84128	7671976729	30137372878	136	5.93182e+09	5.70355e+09	-0.702642	-0.701798
2018	000800	一汽轿车	10.74	6.62	12.26	5.23	-0.38476	1.85138	3013126161	27452750193	243	10774050000	9.34581e+09	-0.383102	-0.3829
2018	000825	太钢不锈	4.97	4.14	7.17	4.14	-0.16532	1.96019	11165730101	65993129889	136	2.35825e+10	2.35817e+10	-0.126167	-0.116331
2018	000826	启迪桑德	33.24	10.39	33.8	10.04	-0.68534	1.19289	1706525161	31430477830	229	1.48637e+10	1.2319e+10	-0.553333	-0.547365
2018	000831	五矿稀土	12.35	8.37	12.96	8.32	-0.32391	3.65169	3581899208	38981897557	243	8.21004e+09	8.21004e+09	-0.32391	-0.32391
2018	000839	中信国安	9.68	3.37	9.65	2.82	-0.64859	2.36411	9266907127	54296737623	243	1.32098e+10	1.32071e+10	-0.644688	-0.643379
2018	000878	云南铜业	14.3	7.93	14.55	7.87	-0.44116	2.04132	2891328845	31942354146	233	11232042484	1.1232e+10	-0.441156	-0.441156
2018	000883	湖北能源	4.65	3.67	4.8	3.45	-0.20734	0.2792	1816885386	7721459384	243	2.38823e+10	1.96192e+10	-0.188824	-0.185745
2018	000917	电广传媒	9.08	6.92	9.06	3.79	-0.2362	4.16648	5906224655	39616124784	243	9.80949e+09	8.95861e+09	-0.236203	-0.236203
2018	000937	冀中能源	5.82	3.77	6.32	3.67	-0.35223	0.9771	3452626282	17039732048	243	1.33215e+10	1.09579e+10	-0.336884	-0.335052
2018	000959	首钢股份	6	3.73	6.42	3.69	-0.37625	0.55079	2913366220	13128325039	243	19729423208	1.10651e+10	-0.376254	-0.376254
2018	000960	锡业股份	13.25	9.54	16.67	8.79	-0.27727	3.16941	5289041741	70026359084	243	1.59201e+10	1.34146e+10	-0.277273	-0.277273
2018	000970	中科三环	14.38	7.33	14.65	6.92	-0.49026	3.30933	3525094832	38703922387	243	7807916000	7807916000	-0.485985	-0.484006
2018	000977	浪潮信息	20	15.92	28.81	15.73	-0.1992	8.2262	10605651413	236941975095	243	2.05249e+10	2.0443e+10	-0.197788	-0.197183
2018	000983	西山煤电	10.2	5.49	11.37	5.47	-0.45858	2.18636	6889671422	56752181624	243	17300088000	1.73001e+10	-0.455333	-0.454635
2018	000999	华润三九	27	24.86	30.3	21.73	-0.08603	0.9552	935045032	24854823848	243	24335454000	2.43229e+10	-0.07073	-0.069118
2018	001965	招商公路	13.6	8.03	13.76	7.19	-0.42022	0.34926	2157801429	22510869612	243	4.9611e+10	4.45531e+09	-0.404993	-0.404404
2018	002038	双鹭药业	31.01	24.81	48.59	24.81	-0.1989	2.75016	1883587936	67558548884	243	16992369000	1.409e+10	-0.190006	-0.182758
2018	002049	紫光国微	47.66	28.9	59.1	28.9	-0.39779	10.3708	6293185153	286097474104	238	1.7537e+10	1.75204e+10	-0.397242	-0.396749
2018	002051	中工国际	18.41	11.08	18.96	10.5	-0.39881	0.69888	777621063	10999972158	126	1.23284e+10	12309981936	-0.383492	-0.379816
2018	002074	国轩高科	22.31	11.56	23.2	10.53	-0.48068	2.60702	2963267074	46796791011	243	1.31397e+10	1.16557e+10	-0.476749	-0.47619
2018	002085	万丰奥威	17.7	7.75	17.31	6.82	-0.56704	0.98176	2146984044	19922808216	195	1.69483e+10	16381450187	-0.554946	-0.550279
2018	002129	中环股份	11.51	7.23	12.02	5.4	-0.37076	4.79758	13361997980	119463672752	227	2.01367e+10	1.91178e+10	-0.369084	-0.369017
2018	002131	利欧股份	2.61	1.47	3.1	1.47	-0.43462	2.0008	11121629491	25058723139	243	8.90424e+09	5.7092e+09	-0.432002	-0.430385
2018	002152	广电运通	7.45	5.61	8.59	5.17	-0.24597	2.17239	5276478381	36355672953	243	1.3626e+10	1.11001e+10	-0.222874	-0.219086
2018	002174	游族网络	22.3	18.59	24.72	13.83	-0.16637	1.48688	1321046226	26237715034	243	1.65166e+10	1.18843e+10	-0.162197	-0.162933
2018	002183	怡亚通	7.06	5.01	7.93	4.93	-0.28936	2.00423	4254375237	28018037299	229	1.06347e+10	1.0623e+10	-0.282972	-0.281135
2018	002195	二三四五	5.85	3.69	7.55	3.68	-0.36815	4.26746	18960181611	97122994142	243	1.63945e+10	1.58382e+10	-0.173761	-0.173459
2018	002292	奥飞娱乐	14.3	5.66	14.62	4.96	-0.60392	1.83727	2493470728	23174525406	243	7.68152e+09	4.31981e+09	-0.603919	-0.603919
2018	002299	圣农发展	14.42	16.54	18.8	11.95	0.14861	1.84214	2283294273	36570496654	243	2.0501e+10	18374286000	0.148611	0.148611
2018	002344	海宁皮城	7.44	4.55	7.14	4	-0.42623	0.92047	1180729768	6350367603	217	5.83649e+09	5.80278e+09	-0.412808	-0.411097
2018	002353	杰瑞股份	13.27	15	22.84	12.7	0.14329	3.1681	3034576511	53777489404	243	14367809880	10109408505	0.1512	0.152439
2018	002375	亚厦股份	7.53	5.04	7.88	4.67	-0.32979	1.46048	1957034066	11731125460	243	6.75358e+09	6.26335e+09	-0.324562	-0.324468
2018	002385	大北农	6.1	3.2	6.93	3.15	-0.47195	0.91782	3894293302	20083946216	238	13577580368	8.43148e+09	-0.464051	-0.458746
2018	002399	海普瑞	15.29	23.05	25.49	15.16	0.50851	0.93803	1169915843	23167170414	243	2.8748e+10	2.8748e+10	0.511491	0.511453
2018	002424	贵州百灵	15.45	8.75	16.09	7.56	-0.43182	1.19983	1693203183	21435649545	243	12348000000	6.37253e+09	-0.428292	-0.426623
2018	002426	胜利精密	5.82	2.32	6.15	2.29	-0.60206	1.10293	3795740312	14624927999	233	7.98432e+09	4.99272e+09	-0.599223	-0.596913
2018	002450	康得新	22.21	7.64	22.87	7.55	-0.65586	1.26973	4495979427	62617342173	83	2.70525e+10	2.4706e+10	-0.654283	-0.652703
2018	002465	海格通信	9.98	7.8	11.48	7.27	-0.18665	2.39849	5533187292	51069158656	243	1.79942e+10	1.62847e+10	-0.180468	-0.178311
2018	002470	金正大	8.24	6.32	9.63	5.5	-0.30929	0.63817	2099964786	15783963006	210	2.07967e+10	1.71754e+10	-0.301721	-0.300546
2018	002500	山西证券	9.29	5.92	9.88	4.92	-0.35792	2.41615	6834610354	50367585470	243	1.67461e+10	1.67461e+10	-0.349914	-0.348156
2018	002568	百润股份	13.46	9.14	16.11	8	-0.31123	1.39793	743336890	9063690740	243	4860127821	3.60474e+09	-0.303597	-0.302185
2018	002570	*ST 因美	7.07	4.96	7.4	3.95	-0.31111	2.09556	2142752706	11252715058	242	5071699200	5071483440	-0.311111	-0.311111
2018	002572	索菲亚	36.77	16.75	39.35	16.75	-0.54484	1.52058	1404140849	40116839938	243	1.54674e+10	10687809180	-0.538668	-0.532609
2018	002608	江苏国信	10.1	7.65	10.37	6.43	-0.24705	0.18422	696005265	5641194853	243	2.89023e+10	4.12298e+09	-0.247047	-0.247047
2018	002653	海思科	11.37	11.89	14.86	9.8	0.04573	0.53983	583157227	7273699574	243	12844410300	5414109122	0.071647	0.070361
2018	002797	第一创业	9.81	5.42	11.32	4.19	-0.44694	4.56987	16005527858	115716586039	243	18983008000	1.0398e+10	-0.444808	-0.444898
2018	002831	裕同科技	55.93	40.06	60.32	39.69	-0.28311	0.4574	182963832	9167119208	243	16024400600	4.78267e+09	-0.27388	-0.272369
2018	002839	张家港行	11.54	5.35	14.77	4.77	-0.54352	5.02466	9082211901	72471628221	243	9.67027e+09	4.54629e+09	-0.537579	-0.534983
2018	300002	神州泰岳	6.11	3.3	7.72	2.93	-0.46078	2.13051	4178121242	21739494459	243	6.4716e+09	4649903445	-0.459882	-0.459641
2018	300027	华谊兄弟	8.88	4.69	10.49	4.15	-0.46277	3.07285	8588484497	67346611483	243	1.31083e+10	1.03704e+10	-0.460951	-0.459336
2018	300085	银之杰	13.65	7.96	18.19	7.96	-0.41471	2.9066	2053918781	27802971041	243	5.62486e+09	3.30389e+09	-0.414706	-0.414706
2018	300104	乐视网	13.8	2.49	13.8	2.08	-0.83753	9.94145	39660836123	154793732098	219	9.93371e+09	7.57945e+09	-0.837515	-0.836767
2018	300133	华策影视	10.85	8.96	13.06	8.64	-0.17343	1.79709	3186742958	35196816410	243	1.58886e+10	1.23859e+10	-0.170728	-0.170018
2018	300146	汤臣倍健	15.18	16.99	21.54	14.63	0.13116	1.99401	2928843847	54131119825	124	2.49552e+10	1.49413e+10	0.1516	0.153129
2018	300168	万达信息	13.53	11.99	26.7	10.23	-0.11053	5.71705	6103752608	100745183136	243	1.31824e+10	1.30902e+10	-0.109259	-0.107715
2018	300182	捷成股份	8.62	4.29	11.49	4.21	-0.50174	2.30913	5945917865	47144504760	243	1.10466e+10	7.45626e+09	-0.498696	-0.496864
2018	300315	掌趣科技	5.56	3.53	6.93	3.53	-0.36511	3.3994	9373797627	48643536825	243	9.73392e+09	9.14264e+09	-0.363509	-0.363309
2018	600008	首创股份	5.15	3.43	5.81	3.02	-0.33268	1.15384	6560077610	30934780774	243	1.95011e+10	1.65347e+10	-0.321701	-0.317121
2018	600021	上海电力	9.15	8.1	9.38	6.19	-0.11379	0.43022	1125947019	8814163388	243	2.1199e+10	1.73319e+10	-0.09185	-0.091904
2018	600022	山东钢铁	2.14	1.57	2.27	1.57	-0.26636	1.06906	11702533139	22679765206	146	1.71861e+10	1.71861e+10	-0.266355	-0.266355
2018	600037	歌华有线	13.02	8.59	13.74	8.16	-0.33872	0.8892	1237568474	13865765546	241	1.19554e+10	1.19554e+10	-0.328244	-0.324865
2018	600060	海信电器	15.03	8.68	16.93	8.26	-0.4221	1.67189	2187637474	28875828380	243	1.13576e+10	1.13576e+10	-0.41239	-0.407723
2018	600074	*ST 保千	9.38	1.2	9.38	1.13	-0.87842	2.06958	5045388112	8984859152	242	2.92546e+09	1.23126e+09	-0.878419	-0.878419
2018	600098	广州发展	7.06	5.66	7.34	5.21	-0.19943	0.37013	1009042388	6349400108	243	1.54303e+10	1.54303e+10	-0.186584	-0.18529
2018	600108	亚盛集团	4.12	2.64	4.19	2.48	-0.35766	1.80768	3519392620	11868060854	243	5.13986e+09	5.13986e+09	-0.356568	-0.356448
2018	600150	*ST 船舶	22.2	13.13	22.2	9.27	-0.46777	1.44955	1997653121	27949422717	191	1.80947e+10	1.80947e+10	-0.467775	-0.467775
2018	600157	永泰能源	3.03	1.34	3.02	1.27	-0.60119	0.80193	9964560380	19273361340	77	1.66506e+10	1.66506e+10	-0.60119	-0.60119
2018	600166	福田汽车	2.81	1.82	2.91	1.54	-0.35231	1.13401	7563990534	16535954668	243	1.21396e+10	1.21396e+10	-0.350678	-0.350498
2018	600252	中恒集团	4.34	2.57	4.3	2.41	-0.41458	0.89327	3104195765	10724461979	243	8.93103e+09	8.93103e+09	-0.405311	-0.400911
2018	600256	广汇能源	5.06	3.76	5.34	3.65	-0.25692	2.08966	14078250214	63731936722	230	2.53315e+10	2.53315e+10	-0.174979	-0.152482
2018	600277	亿利洁能	6.44	5.66	7.01	4.56	-0.12112	0.87719	2402570128	12847780988	233	1.55024e+10	1.51349e+10	-0.111425	-0.111801
2018	600315	上海家化	36.41	27.3	46.34	23.78	-0.25996	1.37707	924355349	32342544571	243	1.83251e+10	1.83251e+10	-0.256617	-0.255083
2018	600316	洪都航空	14.19	9.89	14.53	7.71	-0.30155	2.59531	1861136904	20958116643	243	7.09226e+09	7.09226e+09	-0.300592	-0.300636
2018	600317	营口港	3.39	2.26	3.41	2.15	-0.33333	0.24654	1595830658	4267783404	243	1.46289e+10	1.46289e+10	-0.325792	-0.325959
2018	600348	阳泉煤业	7.37	5.04	9.35	4.99	-0.31707	2.7094	6516108445	47093143197	243	12121200000	12121200000	-0.294781	-0.289295
2018	600350	山东高速	5.99	4.56	6.53	3.92	-0.23873	0.48309	2324213764	11692697439	243	2.19389e+10	2.19389e+10	-0.207652	-0.209015
2018	600373	中文传媒	16.96	13.01	17.81	8.6	-0.23154	1.13135	1558938051	21383076768	243	1.7927e+10	1.7927e+10	-0.211426	-0.207915
2018	600376	首开股份	9.31	7.19	11.06	6.14	-0.22605	0.58837	1517730852	12513893542	243	1.85471e+10	1.83044e+10	-0.162956	-0.161464
2018	600446	金证股份	15.08	9.5	18.14	8.1	-0.37252	3.67164	3132680885	39813330445	243	8105499598	7932590250	-0.370765	-0.370476
2018	600497	驰宏锌锗	7.17	4.1	8.04	3.99	-0.42254	1.55542	7919100903	48448519101	233	2.08743e+10	1.76706e+10	-0.419777	-0.41831
2018	600518	康美药业	22.28	9.21	27.95	9.21	-0.5881	1.59274	7922088839	122568081223	243	4.58093e+10	4.05534e+10	-0.583901	-0.577594
2018	600549	厦门钨业	25.75	12.08	27.11	12	-0.53069	2.24571	3173875719	67378715931	243	1.70727e+10	16985038096	-0.384231	-0.382129
2018	600578	京能电力	3.71	2.93	3.79	2.91	-0.20811	0.16626	1121721387	3705278622	243	1.97679e+10	1.56316e+10	-0.192928	-0.191892
2018	600582	天地科技	4.64	3.42	5.03	3.25	-0.26452	0.73115	3025933184	12510169254	243	1.4154e+10	1.4154e+10	-0.255944	-0.253763
2018	600597	光明乳业	15.19	8.36	15.79	7.52	-0.44818	1.52408	1866222258	21254721961	243	1.02367e+10	1.02352e+10	-0.440534	-0.437624
2018	600600	青岛啤酒	39.5	34.86	56.39	28.69	-0.11365	1.07057	1446319540	59743651445	243	4.70953e+10	4.70953e+10	-0.10416	-0.102975
2018	600633	浙数文化	15.12	8.15	15.89	7.1	-0.46382	1.32415	1723936701	19032801289	243	1.06107e+10	1.05157e+10	-0.450667	-0.451974
2018	600642	申能股份	5.89	4.88	6.12	4.73	-0.16724	0.42991	1956964753	10723045608	243	2.22139e+10	2.22139e+10	-0.134706	-0.133106
2018	600648	外高桥	18.44	13.74	19.64	12.33	-0.2573	0.56601	642621452	10629434563	243	1.45302e+10	1.45302e+10	-0.249341	-0.246486
2018	600649	城投控股	8.79	5.47	9.34	4.73	-0.37841	0.97709	2471633505	17203613073	243	1.38368e+10	1.32417e+10	-0.351754	-0.35
2018	600654	ST 中安	5.43	2	5.47	1.8	-0.62193	2.29824	2948690266	8854444655	242	2566041984	1510086308	-0.621928	-0.621928
2018	600666	奥瑞德	15.66	3.03	15.66	2.83	-0.82586	5.73725	7041480865	29576072118	164	3.7188e+09	2.43508e+09	-0.825862	-0.825862
2018	600682	南京新百	37.77	8.78	38.68	8.44	-0.76766	2.49228	3221807885	47182725476	163	1.135e+10	8.54364e+09	-0.766101	-0.765282
2018	600685	中船防务	24.05	9.56	24	9.05	-0.64141	0.77652	1097614318	16575381744	192	1.35131e+10	1.35131e+10	-0.64141	-0.64141
2018	600717	天津港	10.5	7.07	11.02	6.79	-0.32602	0.81542	1365638592	12255333719	243	1.18406e+10	1.18406e+10	-0.314179	-0.311916
2018	600718	东软集团	14.69	11.55	16.39	9.21	-0.21214	2.6588	3303212177	44739868717	243	1.43494e+10	1.43494e+10	-0.206492	-0.206003
2018	600737	中粮糖业	7.98	7.36	8.28	6.39	-0.07421	1.40239	2877528322	21849186765	243	1.51018e+10	1.51018e+10	-0.053061	-0.05283
2018	600739	辽宁成大	17.55	10.46	18.5	10	-0.40568	1.10551	1691113272	24154448806	243	1.60008e+10	1.60008e+10	-0.398415	-0.395455
2018	600754	锦江股份	32.31	21.3	39.69	21.19	-0.34035	1.02401	980936216	29698847192	243	19243977756	15976159446	-0.330109	-0.32301
2018	600783	鲁信创投	15.36	15.68	23.44	8.2	0.0215	3.38144	2517007497	39091657394	243	1.16716e+10	1.16716e+10	0.026786	0.024756
2018	600804	鹏博士	17.09	7.03	18.06	6.8	-0.5872	2.16847	3106240594	34557502895	227	1.00702e+10	1.00695e+10	-0.581079	-0.57751
2018	600820	隧道股份	8.36	6.26	8.63	5.25	-0.2512	0.88979	2797597829	18607315389	243	1.9682e+10	1.9682e+10	-0.228038	-0.229665
2018	600827	百联股份	13.49	8.45	13.85	7.6	-0.37361	0.72055	1285582234	13485594811	243	1.47479e+10	1.42267e+10	-0.362221	-0.360267
2018	600839	四川长虹	3.49	2.31	3.55	2.2	-0.33621	1.35909	6273869744	18398065988	243	1.06635e+10	1.0659e+10	-0.333362	-0.332759
2018	600871	*ST 油服	2.69	1.83	3.01	1.83	-0.31461	0.23995	4555373280	10656176018	242	3.47413e+10	2.71972e+10	-0.314607	-0.314607
2018	600873	梅花生物	5.16	4.22	5.54	3.78	-0.18217	1.13366	3523598825	16128111186	243	1.31165e+10	1.2971e+10	-0.117605	-0.118217
2018	600875	东方电气	11.23	7.89	11.52	6.51	-0.29742	0.84807	2621207565	22772267316	238	2.43864e+10	1.84381e+10	-0.297418	-0.297418
2018	600895	张江高科	14.31	14.95	18.5	7.99	0.04545	2.33794	3620736063	52788901243	243	2.31529e+10	2.31529e+10	0.055197	0.052448
2018	600909	华安证券	7.32	4.72	8.62	4.15	-0.35076	1.16798	4229240637	26897642032	243	17091120000	12753440000	-0.343789	-0.342503
2018	600959	江苏有线	8.18	4.12	8.38	4.02	-0.49633	0.38161	1881502597	10174386721	218	20313495509	1.60043e+10	-0.496332	-0.496333
2018	601016	节能风电	3.27	2.32	3.45	2.18	-0.29483	0.89613	3723915194	10871151994	243	9640899200	9640899200	-0.284856	-0.281459
2018	601098	中南传媒	13.82	12.5	14.93	10.11	-0.10007	0.58204	1045339246	13281087803	243	22450000000	22450000000	-0.05279	-0.056875
2018	601099	太平洋	3.64	2.49	3.93	1.97	-0.31215	2.58869	17645342183	49863540563	243	1.69726e+10	1.61323e+10	-0.309758	-0.309392
2018	601106	中国一重	3.79	2.67	3.86	2.56	-0.29178	0.44802	3072401759	9839498625	242	1.83103e+10	17456460000	-0.291779	-0.291777
2018	601118	海南橡胶	5.56	4.49	6.8	4.42	-0.19099	1.30555	5586992913	31967010042	130	1.92146e+10	17650960484	-0.190992	-0.190991
2018	601158	重庆水务	6.47	5.56	6.75	5.09	-0.13932	0.14671	704221858	4264586794	243	26688000000	26688000000	-0.096069	-0.092879
2018	601163	三角轮胎	20.44	11.14	20.81	10.66	-0.45339	0.68219	545754249	8388549745	243	8912000000	3124132235	-0.442146	-0.440137
2018	601168	西部矿业	8.26	5.82	8.78	5.77	-0.29024	2.25384	5370898889	37380684274	243	13869060000	13869060000	-0.280218	-0.278049
2018	601179	中国西电	4.37	3.36	4.69	3.12	-0.23112	0.31513	1615343215	6124973807	243	1.7223e+10	1.7223e+10	-0.220197	-0.218993
2018	601231	环旭电子	15.81	9	15.76	8.07	-0.4293	1.07031	2328915437	25879527611	243	19583312220	19583312220	-0.419628	-0.417565
2018	601258	庞大集团	2.51	1.4	2.62	1.4	-0.44	1.50699	10058653159	20002643948	243	9.34453e+09	9.15387e+09	-0.44	-0.44
2018	601333	广深铁路	5.6	3.16	5.78	2.95	-0.43268	0.9242	6546615440	28053108660	243	22383976920	22383976920	-0.421606	-0.418312
2018	601375	中原证券	6.15	4.26	7.64	3.41	-0.30956	1.31794	5099185406	28437307086	243	16482241182	1.27719e+10	-0.303623	-0.302269
2018	601608	中信重工	4.12	2.6	4.25	2.44	-0.36893	0.5781	2508615886	7996708501	243	1.12825e+10	1.12825e+10	-0.367509	-0.367427
2018	601611	中国核建	10.26	6.53	11.1	6.02	-0.36417	0.73209	1921747402	16825308805	243	17141250000	6280554000	-0.36005	-0.359299
2018	601699	潞安环能	11.55	6.66	14.3	6.64	-0.41476	3.41931	10228557305	108053795244	243	19922785272	19922785272	-0.397008	-0.389543
2018	601718	际华集团	6.73	3.35	6.89	3.22	-0.50223	0.70276	3086266950	14323231981	243	1.4712e+10	1.4712e+10	-0.48118	-0.476969
2018	601866	中远海发	3.41	2.28	3.54	2.07	-0.33138	0.24022	2806507645	7680193894	243	26637525000	26637525000	-0.331378	-0.331378
2018	601872	招商轮船	4.39	3.69	4.64	3.3	-0.15945	0.40299	2444803522	9581325590	243	2.23858e+10	1.74202e+10	-0.150826	-0.151481
2018	601928	凤凰传媒	8.14	7.94	8.51	5.73	-0.02096	0.54322	1382448378	9867104002	243	20206506000	20206506000	0.004184	-0.002466
2018	601958	金钼股份	7.25	5.92	8.13	5.76	-0.18119	0.84831	2737164662	18751785797	243	19101498048	19101498048	-0.175838	-0.175657
2018	601969	海南矿业	8.82	4.48	9.18	3.94	-0.49379	0.55942	1093506531	7194119985	243	8.75715e+09	8.75715e+09	-0.493786	-0.493785
2018	601991	大唐发电	4.15	3.15	4.29	2.99	-0.24096	0.16219	3001533195	10470584798	243	5.82961e+10	4.19266e+10	-0.21864	-0.219277
2018	603000	人民网	10.83	7.3	12.05	6.09	-0.32595	1.51599	1676220489	16055676777	243	8.07154e+09	8.07154e+09	-0.322275	-0.321791
2018	603885	吉祥航空	15.29	12.53	18.11	10.92	-0.18051	0.86841	1560542811	22689664735	243	2.25166e+10	2.25166e+10	-0.168984	-0.165598
2018	000623	吉林敖东	22.5	14.43	23.8	13.79	-0.35867	1.29742	1508612090	29223106878	243	1.67789e+10	1.61433e+10	-0.347501	-0.345333
2018	300058	蓝色光标	5.5	4.34	8.28	3.9	-0.21377	3.45819	7546167340	50593744052	243	9.47038e+09	7.21467e+09	-0.210574	-0.210036
2018	600863	内蒙华电	2.97	2.31	3.03	1.98	-0.22222	0.40401	2346414550	5835009244	243	1.34161e+10	1.34161e+10	-0.212377	-0.212121
2018	601127	小康股份	20.13	17.14	20.49	15.91	-0.14769	0.56127	527508571	9488225932	240	1.61999e+10	3.78577e+09	-0.135513	-0.135753
2018	601929	吉视传媒	2.96	2.05	3.08	1.85	-0.30743	0.90746	2822983544	7021740102	243	6377361892	6377361892	-0.299598	-0.298986
2018	601966	玲珑轮胎	17.52	13.65	19.42	12.93	-0.21821	0.7566	907920650	15133584266	243	1.63801e+10	5.38361e+09	-0.205739	-0.203207
2019	000008	神州高铁	3.89	3.63	4.97	3.32	-0.06684	2.75593	7663678339	31751875939	244	1.00943e+10	9.53901e+09	-0.064363	-0.064267
2019	000009	中国宝安	4.35	6.19	7.56	4.07	0.43619	3.1273	8065969166	46177339561	244	1.59653e+10	1.57464e+10	0.729817	0.728074
2019	000027	深圳能源	5.26	6.21	6.77	5.07	0.18286	0.58437	2316740014	14259059384	244	2.46195e+10	2.46195e+10	0.192847	0.192381
2019	000039	中集集团	10.62	9.82	15.95	9.4	-0.07183	0.60633	2173398760	26717661800	244	3.51998e+10	35191483753	0.161598	0.165784
2019	000046	泛海控股	4.67	4.55	8.29	4.11	-0.0257	0.74802	3886884544	22060191434	244	2.36427e+10	2.35467e+10	0.000636	0.006424
2019	000060	中金岭南	3.96	4.3	6.06	3.86	0.08586	2.35559	8408703223	40425175649	244	1.53496e+10	1.53441e+10	0.104184	0.106061
2019	000061	农产品	4.85	5.59	6.59	4.65	0.15258	1.3061	2216403422	12457902843	244	9.48603e+09	9.4774e+09	0.154704	0.154639
2019	000156	华数传媒	7.96	10.44	13.89	7.98	0.31652	1.57934	2263754576	24280732745	236	1.49642e+10	1.33663e+10	0.346104	0.344262
2019	000400	许继电气	8.93	10.77	12.35	7.76	0.21147	3.14442	3170602935	32410475730	244	1.08597e+10	1.08591e+10	0.217835	0.216873
2019	000402	金融街	6.46	8.12	9.3	6.23	0.26087	0.77974	2330594054	18484282884	244	2.42701e+10	2.42596e+10	0.312971	0.307453
2019	000408	藏格控股	11.15	7.38	12.92	6.56	-0.34225	1.31197	2615787781	23854692875	244	1.47141e+10	3.49433e+09	-0.342246	-0.342246
2019	000413	东旭光电	4.54	3.36	7.24	3.22	-0.25333	5.07649	29089572912	154147695834	229	1.88951e+10	1.6825e+10	-0.243004	-0.237778
2019	000415	渤海租赁	3.62	3.8	5.17	3.38	0.05556	1.13852	7041202982	29475704353	244	2.35012e+10	1.34801e+10	0.055556	0.055556
2019	000423	东阿阿胶	39.57	35.37	51	30	-0.10569	2.09597	1370810890	53654112564	244	2.31327e+10	2.31273e+10	-0.076425	-0.080164
2019	000503	国新健康	15.91	17.12	30.75	13.76	0.07809	4.21434	3787943916	71304459314	234	1.53878e+10	1.53878e+10	0.078086	0.078086
2019	000539	粤电力A	4.6	4.1	5.12	3.71	-0.11447	0.31994	1679760537	7474723622	244	1.99692e+10	1.21876e+10	-0.102057	-0.101512
2019	000540	中天金融	4.38	3.33	5.33	3.03	-0.3158	1.98941	13936290152	58382361934	244	2.33275e+10	2.32211e+10	-0.306167	-0.313578
2019	000553	安道麦A	9.15	10	14.11	8.95	0.09529	0.43487	1063940317	11659753479	244	2.35283e+10	5.41943e+09	0.105882	0.105915
2019	000555	神州信息	9.36	14.81	15.3	8.97	0.58565	5.32347	5165794580	64379135583	244	1.43713e+10	1.39375e+10	0.590363	0.5894
2019	000559	万向钱潮	5.14	5.37	7.62	5.01	0.04883	0.77284	2127762210	13238836595	244	1.47845e+10	1.47844e+10	0.083215	0.087891
2019	000581	威孚高科	17.65	19.05	25.7	16.38	0.07871	1.84595	1862475208	37034504487	244	1.80044e+10	1.80028e+10	0.147893	0.146659
2019	000598	兴蓉环境	4.04	4.63	5.2	4	0.14888	1.07769	3218209574	15058785688	244	1.38262e+10	1.38262e+10	0.16596	0.165261
2019	000623	吉林敖东	14.52	16.53	19.41	14.37	0.14553	1.82319	2120431059	36413328388	244	1.92249e+10	1.88779e+10	0.159441	0.15939
2019	000629	攀钢钒钛	3.01	2.92	3.99	2.69	-0.02667	1.92784	16559677616	57063614997	244	2.50821e+10	13920045953	-0.026667	-0.026667
2019	000630	铜陵有色	1.97	2.33	2.86	1.95	0.18274	1.65422	17413254494	42590976207	244	2.45268e+10	2.22761e+10	0.197403	0.19797
2019	000686	东北证券	6.28	9.3	11.15	6.28	0.48562	3.88029	9081633987	82818419387	244	2.17662e+10	2.17662e+10	0.502371	0.501597
2019	000712	锦龙股份	9.11	15.2	16.4	9.16	0.67401	4.79079	4292546452	57243629998	244	13619200000	1.20992e+10	0.674009	0.674009
2019	000718	苏宁环球	3.18	3.82	4.29	3.13	0.20126	0.82042	2489684420	9315784624	244	1.15923e+10	8.74468e+09	0.304815	0.295597
2019	000729	燕京啤酒	5.65	6.52	8.15	5.44	0.15603	1.53589	4328975043	29038101696	244	1.83769e+10	1.63613e+10	0.159947	0.159929
2019	000738	航发控制	12.11	13.07	16.4	12.13	0.08375	2.01655	2310239747	33444940868	244	1.49735e+10	1.49734e+10	0.086982	0.087065
2019	000750	国海证券	4.35	5.34	6.46	4.49	0.22477	6.60241	27832721754	151701766634	244	2.2511e+10	2.2511e+10	0.229052	0.229358
2019	000778	新兴铸管	4.35	4.17	5.49	3.8	-0.03248	1.42939	5704526239	26349696470	244	1.6642e+10	1.63521e+10	0.014032	0.013921
2019	000792	*ST 盐湖	7.01	8.8	9.75	5.58	0.26074	2.19108	6104544895	44178251598	242	2.45176e+10	24199119956	0.260745	0.260745
2019	000793	华闻集团	3.02	3.37	5.47	2.65	0.13468	5.2608	10507104460	40874572186	244	6.73072e+09	6.54676e+09	0.13468	0.13468
2019	000800	一汽轿车	6.68	9.97	12.65	6.64	0.50604	2.30744	3755365210	36334799613	234	16226175000	1.40752e+10	0.510873	0.510574
2019	000825	太钢不锈	4.18	4.09	5.66	3.74	-0.01208	1.26146	7185576467	33128986435	244	2.32977e+10	2.32969e+10	0.012018	0.012077
2019	000826	启迪环境	10.48	9.18	15.8	8.44	-0.11646	2.89343	4139275553	48430083367	244	1.31327e+10	1.09321e+10	-0.113997	-0.113571
2019	000831	五矿稀土	8.37	12.96	18.38	8.27	0.54839	9.07248	8899098458	125483492430	244	1.27123e+10	1.27123e+10	0.548387	0.548387
2019	000839	中信国安	3.4	3.54	7.07	3.22	0.05045	4.36957	17127971382	81951687001	244	1.38762e+10	1.38762e+10	0.050445	0.050445
2019	000878	云南铜业	7.96	13.66	13.88	7.92	0.72257	3.05932	5199858453	55948967001	244	2.32176e+10	1.93479e+10	0.722572	0.722573
2019	000883	湖北能源	3.66	4.17	4.52	3.59	0.13624	0.30031	1954280078	8165496577	244	2.71361e+10	2.71238e+10	0.16551	0.166213
2019	000898	鞍钢股份	5.11	3.35	6.24	2.88	-0.34698	0.53183	5002030991	24037780606	244	3.15076e+10	3.15076e+10	-0.113167	-0.108187
2019	000917	电广传媒	7	6.74	10.7	5.58	-0.02601	6.40929	9085536510	72286731468	244	9.55433e+09	8.72578e+09	-0.023463	-0.02341
2019	000937	冀中能源	3.78	3.66	4.86	3.37	-0.02918	0.88952	3143153044	12737886387	244	12932781471	1.06382e+10	-0.004157	-0.002653
2019	000959	首钢股份	3.74	3.53	4.74	3.32	-0.05362	0.39948	2112999072	8110497316	244	18671545288	1.78516e+10	-0.053619	-0.053619
2019	000960	锡业股份	9.55	10.44	13.09	9.5	0.09434	2.49659	4166248487	47270018650	244	1.7422e+10	1.74219e+10	0.09434	0.09434
2019	000970	中科三环	7.4	10.75	13.31	7.44	0.46658	6.14214	6542604164	70612833898	244	11450900000	11450900000	0.477722	0.478854
2019	000983	西山煤电	5.5	6.13	7.43	5.3	0.11658	2.15664	6796016103	42370613694	244	19316856000	1.93168e+10	0.171489	0.17122
2019	000999	华润三九	25.01	31.68	33.45	22.08	0.27434	1.19191	1166762086	33342087671	244	31011552000	3.09956e+10	0.292066	0.290024
2019	001965	招商公路	8.02	8.77	10.1	7.77	0.09215	0.1809	1117636822	9609471576	244	5.4183e+10	4.86594e+09	0.126109	0.123786
2019	002010	传化智联	6.59	6.98	9.96	6.04	0.07385	0.90024	2932806355	23114568667	244	2.27395e+10	2.22149e+10	0.087336	0.089231
2019	002038	双鹭药业	25.05	13.15	29.4	12.32	-0.46997	1.84946	1900047094	38490588995	244	13509652500	1.12005e+10	-0.194686	-0.192866
2019	002051	中工国际	11.09	9.72	16.68	8.87	-0.12274	2.06862	2559723848	33187004908	243	1.20276e+10	1.08064e+10	-0.100592	-0.095668
2019	002065	东华软件	7	10.32	11.32	6.25	0.48489	2.92426	9110471717	75554912741	244	32151778110	2.89745e+10	0.507562	0.499281
2019	002074	国轩高科	11.59	14.55	19	11.37	0.25865	3.68522	4188807958	59990029105	244	1.65383e+10	1.46832e+10	0.268414	0.267301
2019	002081	金螳螂	8.1	8.82	12.57	7.49	0.08889	1.24678	3336903057	31720631194	244	2.36059e+10	2.28939e+10	0.111456	0.11358
2019	002085	万丰奥威	7.81	7	9.18	6.79	-0.09677	0.92647	2026083371	15812004593	244	15308157746	14796148556	-0.059478	-0.057613
2019	002131	利欧股份	1.47	2.97	3	1.29	1.02041	5.8519	39099120349	82765750220	244	1.98439e+10	1.60599e+10	1.02041	1.02041
2019	002152	广电运通	5.65	9.61	10.04	5.26	0.71301	3.49986	8431136895	66538340209	244	2.31504e+10	2.30002e+10	0.743877	0.734403
2019	002174	游族网络	18.58	23.27	25.09	13.01	0.25175	3.94056	3501059238	64379213751	244	2.06746e+10	1.50065e+10	0.251748	0.251748
2019	002183	怡亚通	4.96	4.21	6.89	3.88	-0.15968	2.71039	5753349060	29694518603	244	8.93656e+09	8.92447e+09	-0.156201	-0.155689
2019	002195	二三四五	3.7	3.23	6.46	2.99	-0.12466	6.16891	35597228760	160927432044	244	1.86385e+10	1.81039e+10	0.144605	0.14607
2019	002292	奥飞娱乐	5.7	9.93	10	5.09	0.75442	3.29063	4465906520	34014686690	244	1.34766e+10	8.07772e+09	0.754417	0.754417
2019	002294	信立泰	20.86	19.94	28.7	17.97	-0.04548	1.72731	1806788795	41752617543	244	20857559040	20854633842	-0.016186	-0.00718
2019	002299	圣农发展	16.6	24.08	33.44	16.3	0.45586	4.48511	5559208077	145459943791	244	2.98467e+10	26750472000	0.51201	0.516324
2019	002310	东方园林	7.01	5.02	8.85	4.54	-0.27874	3.8657	10381185903	70770299298	239	1.3481e+10	8.27021e+09	-0.266134	-0.26523
2019	002344	海宁皮城	4.55	4.36	5.85	4	-0.04176	1.51805	1947270123	9470630914	244	5.59277e+09	5.56089e+09	-0.037549	-0.037143
2019	002353	杰瑞股份	15.01	36.96	37.29	14.97	1.464	2.55795	2450147035	61492787979	244	3.54023e+10	2.49228e+10	1.47786	1.472
2019	002375	亚厦股份	5.06	5.8	6.99	4.96	0.15079	1.14622	1535932953	9028227236	244	7.77198e+09	7.71975e+09	0.159613	0.159127
2019	002385	大北农	3.22	4.98	8.1	3.14	0.55625	4.11248	17253197352	94526522187	244	2.08927e+10	1.38622e+10	0.615158	0.597719
2019	002399	海普瑞	23.05	19.51	27.68	15.2	-0.15358	1.09728	1368532081	28855740079	244	2.43329e+10	2.43329e+10	-0.149275	-0.149241
2019	002411	延安必康	20.87	15.63	23.15	15.61	-0.25854	1.99832	3062000602	56451854350	244	2.39496e+10	2.22955e+10	-0.258539	-0.258539
2019	002424	贵州百灵	8.7	8.71	13.28	8.17	-0.00457	1.41626	1998629826	20545324809	244	12291552000	6.33912e+09	0.002941	0.004571
2019	002426	胜利精密	2.32	2.36	4.19	2.24	0.01724	4.35345	14982467551	44169871173	244	8.12198e+09	6.56321e+09	0.017241	0.017241
2019	002450	*ST 康得	7.6	3.52	7.84	2.47	-0.53927	3.85425	13647514301	72408034062	121	1.2464e+10	1.14125e+10	-0.539267	-0.539267
2019	002465	海格通信	7.97	10.83	11.15	7.64	0.38846	2.9461	6791712682	65864774192	244	2.49667e+10	2.30406e+10	0.405798	0.403846
2019	002470	金正大	6.35	2.66	8.17	2.45	-0.57911	2.12876	6995169497	26786408498	244	8.74083e+09	7.54524e+09	-0.579114	-0.579114
2019	002500	山西证券	5.94	8.29	10.31	5.94	0.40034	2.85019	8062405202	67408435968	244	2.34501e+10	2.34501e+10	0.408876	0.408784
2019	002568	百润股份	9.18	26.27	28.8	8.87	1.87418	1.87891	976664539	18086642075	244	1.36552e+10	9.16463e+09	1.93344	1.91794
2019	002570	贝因美	4.99	5.36	8.17	4.65	0.08065	2.89691	2962148647	18561409681	243	5480707200	5480413740	0.080645	0.080645
2019	002572	索菲亚	16.75	20.95	26.88	15.09	0.25075	3.20726	2926210422	57059712131	244	1.91142e+10	1.3352e+10	0.274597	0.280597
2019	002608	江苏国信	7.59	7.71	10.57	6.94	0.00784	0.3897	1472314813	13171983877	244	2.9129e+10	1.0946e+10	0.007843	0.007843
2019	002625	光启技术	9.7	9.15	13.3	8.26	-0.07576	1.2476	2688064504	28538323525	244	1.97145e+10	4.67426e+09	-0.075758	-0.075758
2019	002653	海思科	11.6	20.36	25.85	9.72	0.71236	1.36341	1478342570	25722095621	244	22076348000	9871526658	0.739163	0.728343
2019	002797	第一创业	5.42	8.28	8.68	5.4	0.52768	7.97326	27925535667	199583462465	244	28999872000	28999872000	0.530057	0.52952
2019	002831	裕同科技	39.54	26.55	59.09	17.75	-0.33724	0.76052	667049564	20236405461	244	2.3287e+10	1.13088e+10	0.476926	0.47304
2019	002839	张家港行	5.34	5.94	7.65	5.25	0.11028	3.68095	6653544986	42154648234	244	1.07369e+10	5.1418e+09	0.139862	0.138318
2019	002925	盈趣科技	43.1	43.95	60.67	33.85	0.0016	1.89664	868906454	40349353843	244	20134743180	7.29242e+09	0.022078	0.024385
2019	300002	神州泰岳	3.31	3.26	5.71	3.02	-0.01212	3.55468	6971060413	29898452545	244	6.39316e+09	5.1956e+09	-0.012121	-0.012121
2019	300017	网宿科技	7.85	9.53	17.29	7.35	0.21711	8.55468	20822233579	239555696660	244	2.31962e+10	2.0738e+10	0.219807	0.220958
2019	300024	机器人	13.27	14	21.04	13.21	0.059	2.3825	3717275227	61159411871	244	21843354638	21190775830	0.059002	0.059002
2019	300027	华谊兄弟	4.54	4.63	6.06	4.13	-0.01279	2.42167	6751513900	34622181388	244	1.29083e+10	1.02391e+10	-0.012793	-0.012793
2019	300058	蓝色光标	4.35	5.65	6.74	3.8	0.30184	5.22102	13005766171	70484423798	244	1.40744e+10	1.23034e+10	0.310531	0.309378
2019	300070	碧水源	7.9	7.6	10.5	6.03	-0.02564	2.42032	7659323245	62729510507	244	2.40509e+10	1.65772e+10	-0.020589	-0.020641
2019	300072	三聚环保	9.97	6.32	12.5	5.39	-0.35772	3.06765	7208122670	59966809548	244	1.48502e+10	1.34663e+10	-0.355351	-0.354675
2019	300085	银之杰	7.96	15.48	21.25	7.17	0.94472	7.87079	5561821818	88756054581	244	1.09388e+10	6.42515e+09	0.947463	0.947236
2019	300104	乐视网	2.74	1.69	3.21	1.69	-0.32129	3.73407	14896855561	41676520987	76	6.74215e+09	6.70179e+09	-0.321285	-0.321285
2019	300133	华策影视	8.73	7.4	8.79	6	-0.17411	1.87387	3289907273	23930735338	244	1.2992e+10	1.02499e+10	-0.172135	-0.172433
2019	300146	汤臣倍健	17	16.29	23.6	14.4	-0.0412	2.17174	3436766206	65543615953	243	2.57788e+10	1.43658e+10	-0.019999	-0.011772
2019	300168	万达信息	12.07	15.43	18.7	8.53	0.28691	5.91547	6742769898	96184817375	239	1.75879e+10	1.74514e+10	0.289551	0.288991
2019	300182	捷成股份	4.32	3.49	7.01	3.28	-0.18648	4.77792	12302954524	56423282709	244	8.98661e+09	6.35847e+09	-0.18648	-0.18648
2019	300251	光线传媒	7.68	11.8	12.21	6.55	0.55263	2.43543	7144607127	62893458962	244	3.46166e+10	3.28493e+10	0.564483	0.559211
2019	300296	利亚德	7.71	7.67	10.03	5.97	-0.0026	3.1642	8046166950	61890540569	244	1.95039e+10	1.40793e+10	0.006864	0.007802
2019	300315	掌趣科技	3.56	6.17	6.75	3.02	0.74788	5.05741	13945736540	63044976126	244	1.70137e+10	1.6044e+10	0.747875	0.747875
2019	600008	首创股份	3.49	3.29	4.38	3.19	-0.04082	0.9709	5519988861	20858567787	244	1.87051e+10	1.87051e+10	-0.018046	-0.017493
2019	600021	上海电力	8.18	8.05	9.6	7.09	-0.00617	0.59151	1548091116	13151854751	244	2.10682e+10	1.88953e+10	0.033483	0.034568
2019	600022	山东钢铁	1.57	1.43	2.13	1.32	-0.08917	1.63157	17860026861	31164480831	244	1.56536e+10	1.56536e+10	-0.089172	-0.089172
2019	600023	浙能电力	4.73	3.96	5.06	3.71	-0.16279	0.3123	4247444385	18859290983	244	5.38587e+10	5.38587e+10	-0.128227	-0.124736
2019	600037	歌华有线	8.6	9.01	13.48	8.43	0.04889	1.51401	2107164275	22256945382	244	1.25399e+10	1.25399e+10	0.066772	0.069849
2019	600060	海信视像	8.72	10.85	12.55	7.44	0.25	3.08713	4039456422	39506110288	244	1.4197e+10	1.4197e+10	0.262872	0.260369
2019	600074	*ST 保千	1.2	1.04	1.34	1.01	-0.13333	0.66174	1613235274	1928455962	76	2.5354e+09	1.0671e+09	-0.133333	-0.133333
2019	600098	广州发展	5.71	6.54	6.84	5.43	0.15548	0.36311	989909118	6212867546	244	1.78293e+10	1.78293e+10	0.174235	0.173145
2019	600100	同方股份	10.43	8.77	13.73	7.95	-0.09866	2.06122	6109242096	61358155936	244	2.59934e+10	2.59934e+10	-0.098664	-0.098664
2019	600108	亚盛集团	2.64	2.91	4.31	2.59	0.10227	4.03631	7858358761	27486829331	244	5.66552e+09	5.66552e+09	0.103818	0.103977
2019	600153	建发股份	7.07	8.99	10.53	7.05	0.27518	1.35071	3829538159	34013420523	244	2.54885e+10	2.54885e+10	0.347961	0.346099
2019	600157	永泰能源	1.34	1.43	2.61	1.29	0.06716	4.12872	51302638856	101120930681	244	1.77689e+10	1.77689e+10	0.067164	0.067164
2019	600166	福田汽车	1.84	2.09	3.18	1.71	0.14835	2.64287	17377357513	41442107930	244	1.37422e+10	1.37422e+10	0.148352	0.148352
2019	600252	中恒集团	2.57	3.26	3.64	2.52	0.26848	1.30806	4545664759	14059406300	244	1.13288e+10	1.13288e+10	0.294194	0.291829
2019	600256	广汇能源	3.78	3.31	4.61	3.18	-0.11968	1.53457	10425801487	41225226254	244	2.24881e+10	2.22998e+10	-0.094238	-0.093085
2019	600277	亿利洁能	5.64	4.56	9	3.77	-0.19435	2.71011	7422832185	41327883474	234	1.24896e+10	1.21935e+10	-0.179129	-0.179329
2019	600315	上海家化	27.36	30.94	37.05	26.32	0.13333	1.68569	1131517578	35767159840	244	2.07684e+10	2.07684e+10	0.142324	0.142491
2019	600316	洪都航空	9.97	13.03	18.25	9.99	0.31749	5.09776	3655676506	54017923038	244	9.344e+09	9.344e+09	0.318573	0.318706
2019	600317	营口港	2.26	2.55	3.21	2.28	0.12832	0.4508	2918042971	8111974824	244	1.65061e+10	1.65061e+10	0.149114	0.149115
2019	600339	中油工程	3.67	3.39	5.19	3.14	-0.06612	0.99697	5566237795	23025666265	244	1.89269e+10	5.26189e+09	-0.053304	-0.051791
2019	600348	阳泉煤业	5.05	5.53	6.7	5	0.09722	1.89097	4547793352	25991718917	244	13299650000	13299650000	0.153284	0.152778
2019	600350	山东高速	4.51	4.91	5.24	4.26	0.07675	0.44781	2154499171	10298936296	244	2.36228e+10	2.36228e+10	0.131837	0.125219
2019	600373	中文传媒	13.12	13.61	17.18	11.59	0.04612	1.48252	2008914087	27475000378	244	1.84424e+10	1.84424e+10	0.088506	0.08455
2019	600376	首开股份	7.19	7.97	10.41	7	0.10848	0.9425	2431245785	20467278646	244	2.05591e+10	2.05591e+10	0.160647	0.164117
2019	600415	小商品城	3.49	3.87	5.03	3.51	0.10888	0.62416	3397416587	14529404954	244	2.10652e+10	2.10652e+10	0.124837	0.126074
2019	600446	金证股份	9.51	20.58	30.79	9.53	1.16632	11.8896	10230260427	216334659670	244	1.77079e+10	1.75591e+10	1.16632	1.16632
2019	600485	*ST 信威	13.86	3.06	13.86	1.05	-0.79028	1.97573	5776533090	9323244527	117	8.94665e+09	5.7987e+09	-0.790273	-0.789788
2019	600497	驰宏锌锗	4.12	4.38	5.71	3.99	0.06829	1.46725	7470188448	37048214764	244	2.22999e+10	1.88774e+10	0.084873	0.085366
2019	600518	ST 康美	8.29	3.73	11.97	2.58	-0.59501	4.60695	22914342122	162694278505	243	1.85525e+10	1.64448e+10	-0.59242	-0.5924
2019	600535	天士力	19.18	15.42	24.67	14.62	-0.19688	2.05256	3104845020	56875974328	244	2.33253e+10	2.33253e+10	-0.182076	-0.18125
2019	600549	厦门钨业	12.15	13.04	16.11	11.78	0.07947	2.78199	3911602202	55868618867	244	18334842448	18334842448	0.091746	0.091887
2019	600566	济川药业	33.58	24.18	38.26	21.46	-0.27885	1.85401	1510870536	46944794043	244	1.97048e+10	1.97048e+10	-0.251529	-0.242171
2019	600578	京能电力	2.96	3.12	3.51	2.84	0.06485	0.24688	1665660773	5330214402	244	2.10498e+10	1.66453e+10	0.092327	0.09215
2019	600582	天地科技	3.42	3.19	4.45	2.99	-0.06725	1.1468	4746114912	17275358502	244	1.32021e+10	1.32021e+10	-0.053812	-0.052632
2019	600597	光明乳业	8.4	12.69	12.69	8.2	0.51794	2.20532	2700384854	28721469741	244	1.55387e+10	1.55364e+10	0.532551	0.529904
2019	600633	浙数文化	8.22	9.15	12.16	7.56	0.1227	2.16406	2817448024	27520318429	244	1.19126e+10	1.19126e+10	0.132472	0.132515
2019	600642	申能股份	4.9	5.81	6.14	4.91	0.19057	0.542	2662303434	15190274976	244	2.85389e+10	2.64473e+10	0.232792	0.231557
2019	600648	外高桥	13.72	17.37	26.08	13.21	0.26419	1.62362	1843380295	37613358616	244	1.79527e+10	1.79527e+10	0.277974	0.280204
2019	600649	城投控股	5.48	5.72	8.69	5.31	0.0457	1.06842	2702656567	18742566847	244	1.44692e+10	1.38469e+10	0.054958	0.054845
2019	600654	*ST 中安	2.01	1.9	2.69	1.15	-0.05	1.94679	2497775286	4757972959	243	2.43774e+09	1.43458e+09	-0.05	-0.05
2019	600663	陆家嘴	12.98	13.51	20	12.84	0.04003	0.2764	1115053237	18005975422	244	4.70566e+10	4.70566e+10	0.28315	0.286451
2019	600666	*ST 瑞德	3.04	2.2	5.61	1.18	-0.27393	7.24653	8893855295	27131939571	243	2700117728	1.76804e+09	-0.273928	-0.273927
2019	600682	南京新百	8.8	10.11	16.49	8.52	0.15148	3.09406	4165010826	50805222123	241	1.36094e+10	1.01318e+10	0.151481	0.151481
2019	600685	中船防务	9.56	14.75	20.46	9.45	0.54289	1.96905	2783267756	45384443250	234	2.08492e+10	2.08492e+10	0.542887	0.542887
2019	600688	上海石化	5	3.87	5.75	3.72	-0.22445	0.21587	2336562767	11484780947	244	41888158245	41888158245	-0.18439	-0.174349
2019	600704	物产中大	4.6	5.25	6.2	4.51	0.14629	0.79169	4007686053	22113210419	244	26576455710	2.26101e+10	0.198967	0.200873
2019	600717	天津港	7.11	6.28	9.52	5.83	-0.11174	0.90111	1810983519	14000976296	244	1.26211e+10	1.26211e+10	0.080603	0.081188
2019	600718	东软集团	11.04	11.35	16.74	9.88	-0.01732	2.83028	3516256708	45970467593	244	1.41009e+10	1.41009e+10	-0.017316	-0.017316
2019	600733	北汽蓝谷	8.01	5.84	11.71	5.07	-0.26633	1.42814	4989438705	41703693037	244	2.0403e+10	9.84824e+09	-0.266332	-0.266332
2019	600737	中粮糖业	7.33	8.46	11.53	6.92	0.14946	2.66062	5690661385	52475513803	244	1.80947e+10	1.73589e+10	0.149456	0.149457
2019	600739	辽宁成大	10.58	15.23	15.62	9.91	0.45602	2.37027	3625825911	50245613549	244	2.32975e+10	2.32975e+10	0.456023	0.456023
[truncated: 2,933 more rows]
